# Supplementary material for: Some data quality issues at ClinicalTrials.gov
Source: Trials. 2019 Jun 24;20:378. doi: 10.1186/s13063-019-3408-2 (PMC6591874; doi:10.1186/s13063-019-3408-2)
Supplement: Supplementary file 12 — Data in the form of individual investigators and their matching roles. The data (31,375 records from Additional file 11: Table S9) were sorted into a “LineByLine” sheet, where records that contained multiple names and roles were segregated such that each row contains one name and the corresponding role. The data are presented in the following six Recruitment Type categories: (1) Active, not recruiting (4805 records), (2) Completed (24,135), (3) Enrolling by invitation (201), (4) Recruiting (37,248), (5) Suspended (214), and (6) Terminated (4756). The sheets for these categories are numbered 1–6, respectively. (XLS 5686 kb) [file 13063_2019_3408_MOESM12_ESM.xls]

## Sheet: S10 Table_Legend
S10 Table. Data in the form of individual investigators and their matching roles. The data (31,375 records from S9 Table) was sorted into a 'LineByLine' sheet, where records that contained multiple names and roles were segregated such that each row contains one name and the corresponding role. The data is presented in the following six Recruitment Type categories: (1) Active, not recruiting (4,80…

## Sheet: 1_Active_LineByLine
NCT ID	Last name	Role
NCT00045968	Linda Liau, M.D.	Principal Investigator
NCT00045968	Marnix L. Bosch, MBA, PhD	Study Director
NCT00062868	Helen E Heslop, MD	Principal Investigator
NCT00072982	Robert B Zurier, MD	Principal Investigator
NCT00079417	Debra Friedman, MD	Principal Investigator
NCT00081263	Janet Rader	Principal Investigator
NCT00083083	Mitchell Machtay, MD	Study Chair
NCT00085098	Jeffrey C. Allen, MD	Study Chair
NCT00098787	Neal J. Meropol, MD	Study Chair
NCT00098787	Jean L. Grem, MD	Study Chair
NCT00098839	Elizabeth Raetz, MD	Principal Investigator
NCT00099086	David Marshall, MD	Principal Investigator
NCT00099437	Faslodex Medical Science Director, MD	Study Director
NCT00100061	Lynn Stothers, MD	Principal Investigator
NCT00100802	Regina Jakacki, MD	Study Chair
NCT00102908	Jeannie S. Huang, MD, MPH	Principal Investigator
NCT00103285	Kelly Maloney, MD	Principal Investigator
NCT00104923	Ann Mohrbacher, MD	Study Chair
NCT00108745	Larry Copeland	Principal Investigator
NCT00114140	Barbara J. Fisher, MD	Principal Investigator
NCT00114140	David R. Macdonald, MD, FRCPC	Study Chair
NCT00114140	Glenn J. Lesser, MD	Study Chair
NCT00114140	Stephen W. Coons, MD	Study Chair
NCT00114231	Julio Garcia-Aguilar, MD, PhD	Study Chair
NCT00114738	Wyndham H Wilson, M.D.	Principal Investigator
NCT00115778	Selim M Arcasoy, M.D.	Principal Investigator
NCT00116142	Anthony V. D'Amico, MD, PhD	Principal Investigator
NCT00117936	Nabil Dib, MD	Principal Investigator
NCT00118209	Wyndham H. Wilson, MD, PhD	Study Chair
NCT00118209	Andrew D. Zelenetz, MD, PhD	Study Chair
NCT00118274	Craig L. Slingluff, MD	Principal Investigator
NCT00118352	Brenda Sandmaier	Principal Investigator
NCT00121251	Scott Tagawa	Principal Investigator
NCT00122005	Bernard Fox, PhD	Principal Investigator
NCT00126581	Pasi Janne	Principal Investigator
NCT00126672	Sandra Dabora, MD, PhD	Study Chair
NCT00127205	Julie R. Gralow, MD	Study Chair
NCT00127205	Robert B. Livingston, MD	Study Chair
NCT00127205	James N. Ingle, MD	Study Chair
NCT00127205	Carla I. Falkson, MD	Study Chair
NCT00127205	Alexander H Paterson, MD, FRCP	Study Chair
NCT00127205	Elizabeth C. Dees, MD	Study Chair
NCT00127205	Mark J. Clemons, MD	Study Chair
NCT00129740	Jorge Cortes, MD	Principal Investigator
NCT00130117	Christos S Mantzoros, MD, ScD	Principal Investigator
NCT00132301	Daniel Lin	Study Chair
NCT00132301	Bruce Montgomery, MD	Study Chair
NCT00132743	Don Cutlip, MD	Principal Investigator
NCT00132743	Timothy Murphy, MD	Principal Investigator
NCT00134030	Neyssa Marina, MD	Principal Investigator
NCT00134056	David I. Quinn, MD	Study Chair
NCT00134056	Maha Hadi A. Hussain, MD	Study Chair
NCT00134056	Primo N. Lara, MD	Study Chair
NCT00134056	Mark Garzotto, MD	Study Chair
NCT00134082	Richard Ambinder, MD	Study Chair
NCT00135200	Mark Kaminski, MD	Principal Investigator
NCT00141921	MD	Study Director
NCT00142519	Natalia Moryl, MD	Principal Investigator
NCT00147914	Jacquelynne Corey, M.D.	Principal Investigator
NCT00150800	UCB Cares	Study Director
NCT00151203	Ruben Niesvizky, MD	Principal Investigator
NCT00154180	S Mitchell Harman, MD, PhD	Study Director
NCT00154180	Frederick Naftolin, MD, PhD	Study Director
NCT00154180	Michael Mendelsohn, MD	Principal Investigator
NCT00154180	Howard Hodis, MD	Principal Investigator
NCT00154180	Matthew Budoff, MD	Principal Investigator
NCT00154180	Sanjay Asthana, MD	Principal Investigator
NCT00154180	Dennis M Black, PhD	Principal Investigator
NCT00174525	Daniel E. Grosz, MD	Principal Investigator
NCT00175123	Bettina Jorgensen, MD	Principal Investigator
NCT00175916	UCB Cares	Study Director
NCT00179998	Robert G Castile, MD	Principal Investigator
NCT00182715	Timothy Maughan, MD	Study Chair
NCT00183872	Syma Iqbal, M.D.	Principal Investigator
NCT00184015	David Quinn, MD, PhD	Principal Investigator
NCT00185731	Dean Felsher	Principal Investigator
NCT00186888	Ibrahim Qaddoumi, M.D.	Principal Investigator
NCT00195624	Danielle M Townsley, M.D.	Principal Investigator
NCT00200161	Lisa DeAngelis, M.D	Principal Investigator
NCT00201760	Kari Kendra, MD	Principal Investigator
NCT00203411	Arash Naeim, MD, PhD	Study Chair
NCT00203411	Randy Hecht, MD	Study Chair
NCT00205504	Kai I Cheang, Pharm.D.	Principal Investigator
NCT00205504	John E Nestler, M.D.	Study Director
NCT00214747	Kurt Barnhart, MD	Principal Investigator
NCT00214838	Donald Picker, PhD	Study Director
NCT00216242	Nancy Bouveret, MD	Study Director
NCT00217594	Christopher S Hourigan, M.D.	Principal Investigator
NCT00217737	Al Benson	Principal Investigator
NCT00217763	Pr. Bruno Vellas	Principal Investigator
NCT00225537	Charles T Leach, Prof. M.D.	Principal Investigator
NCT00225537	Anastacio M Hoyumpa, Prof. M.D.	Principal Investigator
NCT00225537	Dubravko Pavlin, PhD	Study Director
NCT00227019	Heather A. Wakelee	Principal Investigator
NCT00227461	A.M. Barrett, MD	Principal Investigator
NCT00227617	Emily K. Bergsland, MD	Principal Investigator
NCT00232505	Lisa A. Carey, MD	Principal Investigator
NCT00233324	Abbot R. Laptook, MD	Principal Investigator
NCT00233324	Michele C. Walsh, MD MS	Principal Investigator
NCT00233324	Ronald N. Goldberg, MD	Principal Investigator
NCT00233324	Barbara J. Stoll, MD	Principal Investigator
NCT00233324	Brenda B. Poindexter, MD MS	Principal Investigator
NCT00233324	Abhik Das, PhD	Principal Investigator
NCT00233324	Krisa P. Van Meurs, MD	Principal Investigator
NCT00233324	Ivan D. Frantz III, MD	Principal Investigator
NCT00233324	Neil N. Finer, MD	Principal Investigator
NCT00233324	Kurt Schibler, MD	Principal Investigator
NCT00233324	Waldemar A. Carlo, MD	Principal Investigator
NCT00233324	Edward F. Bell, MD	Principal Investigator
NCT00233324	Kristi L. Watterberg, MD	Principal Investigator
NCT00233324	Pablo J. Sanchez, MD	Principal Investigator
NCT00233324	Kathleen A. Kennedy, MD MPH	Principal Investigator
NCT00233324	Roger G. Faix, MD	Principal Investigator
NCT00233324	Seetha Shankaran, MD	Principal Investigator
NCT00233324	Richard A. Ehrenkranz, MD	Principal Investigator
NCT00233454	Jason Robert Gotlib	Principal Investigator
NCT00233987	Eileen P. Smith, MD	Study Chair
NCT00233987	Patrick J. Stiff, MD	Study Chair
NCT00233987	Louis S. Constine, MD	Study Chair
NCT00234052	Jyoti D. Patel	Study Chair
NCT00234312	Joshua Boverman, MD	Principal Investigator
NCT00235053	Eli O Meltzer, MD	Principal Investigator
NCT00237068	Benjamin D. Gold, MD.	Principal Investigator
NCT00237523	Julia Kazakhin, M.D.	Study Director
NCT00238238	John P. Leonard, MD	Study Chair
NCT00238433	Richard Maziarz, MD	Study Chair
NCT00239746	John Breitner, MD	Principal Investigator
NCT00242593	Suzanne Craft, PhD	Principal Investigator
NCT00244972	David Hong	Principal Investigator
NCT00247520	Wynne H Weston-Davies, MB FRCS	Study Director
NCT00247624	W. Vaughn McCall, MD, MS	Principal Investigator
NCT00248287	Joyce A. O'Shaughnessy, MD	Principal Investigator
NCT00248495	Grace K. Dy, MD	Principal Investigator
NCT00248521	Ian R. Judson, MA, MD, FRCP	Study Chair
NCT00249691	Bankole Johnson	Principal Investigator
NCT00251433	Novartis Pharmaceuticals	Study Director
NCT00254410	William G. Wierda, MD, PHD, BS	Principal Investigator
NCT00254423	Jorge Cortes, MD	Principal Investigator
NCT00254592	Rita Mehta, M.D.	Principal Investigator
NCT00255346	Hagop M Kantarjian, MD	Principal Investigator
NCT00255801	David J. Straus, MD	Principal Investigator
NCT00255801	Steven M. Horwitz, MD	Principal Investigator
NCT00255801	Patricia L. Myskowski, MD	Principal Investigator
NCT00256308	Ignatius Ou, MD	Principal Investigator
NCT00258687	F. Stephen Hodi, MD	Principal Investigator
NCT00262067	Leonardo Faoro, MD	Study Director
NCT00263341	Ruth Merkatz, Ph.D.	Study Director
NCT00263588	Novartis Pharmaceuticals	Study Director
NCT00265278	Reese Jones, M.D.	Principal Investigator
NCT00265759	Matthew J. Ellis, MD, PhD, FRCP	Study Chair
NCT00265798	Hedy Kindler	Principal Investigator
NCT00265850	Alan Venook, MD	Study Chair
NCT00265941	David Rosenthal, MD	Principal Investigator
NCT00265941	Phuc Felix Nguyen-Tan, MD	Study Chair
NCT00266110	Jonathan S. Serody, MD	Principal Investigator
NCT00268385	Patrick Wen	Principal Investigator
NCT00270959	Douglas F. Zatzick, MD	Principal Investigator
NCT00271505	William N. William Jr., MD	Principal Investigator
NCT00272987	Novartis Pharmaceuticals	Study Director
NCT00274469	AstraZeneca Faslodex Medical Science Director, MD	Study Director
NCT00274924	Lode J. Swinnen, MD	Study Chair
NCT00274937	Carlos Rodriguez-Galindo, MD	Principal Investigator
NCT00274950	Juliet Hale, MD	Principal Investigator
NCT00275067	Jeffrey Raizer, MD	Principal Investigator
NCT00276705	Bruce Morland, MD	Study Chair
NCT00276783	Jeffrey J. Raizer, MD	Study Chair
NCT00278148	Nathan Pennell, MD	Study Chair
NCT00278343	Holger Hirte	Principal Investigator
NCT00278538	Richard Burt, MD	Principal Investigator
NCT00278629	Richard Burt, MD	Principal Investigator
NCT00278915	AstraZeneca Faslodex Medical Science Director, MD	Study Director
NCT00281658	Novartis Pharmaceuticals	Study Director
NCT00282100	Alex Chang, M.D.	Principal Investigator
NCT00287287	Kenneth B Ain, M.D.	Principal Investigator
NCT00287924	Martin W. English, MD	Study Chair
NCT00288015	Mark Agulnik, MD	Principal Investigator
NCT00288080	Howard M. Sandler, MD	Principal Investigator
NCT00288080	Seth Rosenthal, MD	Study Chair
NCT00288080	Kenneth J. Pienta, MD, FACP	Study Chair
NCT00288080	Leonard G. Gomella, MD	Study Chair
NCT00288093	Tanios Bekaii-Saab	Principal Investigator
NCT00288873	Emily M Stein, M.D.	Principal Investigator
NCT00290498	Luis E. Fayad, MD	Principal Investigator
NCT00293501	Deborah L. Ornstein, MD	Study Chair
NCT00294658	Gary Cutter, PhD	Principal Investigator
NCT00294658	Gil Wolfe, MD	Principal Investigator
NCT00295373	Robert E Hannemann, MD	Principal Investigator
NCT00295373	Michael G Flynn, PhD	Study Director
NCT00295841	Bayard L. Powell, MD	Study Chair
NCT00295893	George Somlo, MD	Principal Investigator
NCT00295932	John F. Gerecitano, MD, PhD	Study Chair
NCT00298155	R. Bruce Montgomery, MD	Principal Investigator
NCT00298155	Peter S. Nelson, MD	Principal Investigator
NCT00299962	Daniel H. Sterman, M.D.	Principal Investigator
NCT00300781	Puma	Study Director
NCT00300807	John Andrews, PhD	Study Director
NCT00301067	Timothy M. Kuzel, MD	Study Chair
NCT00301093	Martha Wadleigh, MD	Principal Investigator
NCT00301756	Amit Oza	Principal Investigator
NCT00301925	David Cameron, MD	Study Chair
NCT00302003	Frank Keller, MD	Principal Investigator
NCT00304031	Mark R. Gilbert, MD	Principal Investigator
NCT00304031	Minesh P. Mehta, MD	Study Chair
NCT00304031	Roger Stupp, MD	Study Chair
NCT00304070	Carlos Rodriguez-Galindo	Principal Investigator
NCT00306202	Bristol-Myers Squibb	Study Director
NCT00307151	Paul Palumbo, MD	Study Chair
NCT00307151	Avy Violari, MD	Study Chair
NCT00309179	Eisai Medical Services	Study Director
NCT00309907	Gregory Yanik, MD	Principal Investigator
NCT00309985	Christopher Sweeney, MBBS	Study Chair
NCT00310037	Lawrence D. Kaplan, MD	Study Chair
NCT00310180	Joseph Sparano	Principal Investigator
NCT00310388	GSK Clinical Trials	Study Director
NCT00311805	Douglas W. Losordo, M.D.	Principal Investigator
NCT00313586	Steven Gore	Principal Investigator
NCT00314366	Emerson Perin, MD, PhD	Principal Investigator
NCT00314925	Rudin Charles, MD, PhD	Study Chair
NCT00315341	Walter Ling, M.D.	Principal Investigator
NCT00315341	Andrew Saxon, M.D.	Principal Investigator
NCT00315627	Rodolfo Alejandro, M.D.	Principal Investigator
NCT00316862	David H. Ilson, MD, PhD	Study Chair
NCT00316888	Madhur K. Garg, MD	Study Chair
NCT00316888	Joseph A. Sparano, MD	Study Chair
NCT00317603	Beth Overmoyer, MD	Principal Investigator
NCT00318383	Matt Hohenboken, MD, PhD	Study Director
NCT00319839	S.-H. Ignatius Ou, MD, PhD	Principal Investigator
NCT00321685	Jerome Landry	Principal Investigator
NCT00321698	Mark Garzotto, MD	Principal Investigator
NCT00322023	Daniel C. Javitt, MD, PhD	Principal Investigator
NCT00322218	Biogen Idec, MD	Study Director
NCT00322309	Maryam Afshar, MD	Principal Investigator
NCT00323063	Deborah R. Toppmeyer, MD	Principal Investigator
NCT00324805	Heather Wakelee	Principal Investigator
NCT00325182	Ofra Sarid-Segal, MD	Principal Investigator
NCT00325286	Sriram Ramaswamy, M.D.	Principal Investigator
NCT00326872	Dusica Babovic-Vuksanovic	Principal Investigator
NCT00329043	Amado Zurita, MD	Principal Investigator
NCT00329719	Kurt Jaeckle	Principal Investigator
NCT00331162	Alan C Farney, MD, Ph.D.	Principal Investigator
NCT00331630	Virginia G. Kaklamani, MD	Principal Investigator
NCT00331760	Anuja Jhingran, MD	Study Chair
NCT00334672	Vasanta Nanduri, MD	Study Chair
NCT00334737	Robin K Ohls, MD	Principal Investigator
NCT00334737	Robert D Christensen, MD	Principal Investigator
NCT00334737	Susan Wiedmeier, MD	Principal Investigator
NCT00334737	Adam Rosenberg, MD	Principal Investigator
NCT00334789	Thehang Luu	Principal Investigator
NCT00335816	Julio Garcia-Aguilar, MD, PhD	Study Chair
NCT00335868	Ronald Paquette, MD	Study Chair
NCT00336024	Claire Mazewski, MD	Principal Investigator
NCT00336063	Wen-Son Hsieh	Principal Investigator
NCT00336947	Mamoru Tsukuda, MD	Study Chair
NCT00337207	Jeffrey J. Raizer, MD	Principal Investigator
NCT00338182	Emerging Oncology Medical Science Director, MD	Study Director
NCT00338286	Janssen Research &amp; Development, LLC C. Clinical Trial	Study Director
NCT00346164	Sheri Spunt, MD	Principal Investigator
NCT00347828	Michael B Raizman, B.A./M.D.	Principal Investigator
NCT00347828	Sandra Y Cho, B.A./M.D.	Study Director
NCT00347828	Rahul Mandiga, B.S.	Study Director
NCT00348816	Gregory P. Swanson, MD	Study Chair
NCT00348946	Judith L. Ross, M.D.	Principal Investigator
NCT00350701	Paresh Dandona, MD	Principal Investigator
NCT00351299	Gerald L Weinhouse, MD	Principal Investigator
NCT00352027	Monika Metzger, M.D.	Principal Investigator
NCT00352794	Srdan Verstovsek, MD	Principal Investigator
NCT00354744	Brenda Weigel, MD	Study Chair
NCT00354744	Carola A Arndt, MD	Study Chair
NCT00354835	Douglas Hawkins, MD	Principal Investigator
NCT00357448	Lupe Salazar	Principal Investigator
NCT00357877	Athena Papas, PhD DMD	Principal Investigator
NCT00358163	Pankaj Bhargava, MD	Principal Investigator
NCT00361244	Andrew X. Zhu, MD	Principal Investigator
NCT00361296	B. Douglas Smith, MD	Principal Investigator
NCT00364351	Clinical Sciences &amp; Operations	Study Director
NCT00364390	Bartley P Griffith, MD	Principal Investigator
NCT00364390	George Tellides, M.D., Ph.D.	Principal Investigator
NCT00364598	Kenneth B Margulies, M.D.	Principal Investigator
NCT00364598	Y. Joseph Woo, M.D.	Principal Investigator
NCT00365105	Michael J. Seider, MD, PhD, FACR	Study Chair
NCT00365157	David Quinn	Principal Investigator
NCT00367471	Novartis Pharmaceuticals	Study Director
NCT00369317	Jeffrey Taub, MD	Principal Investigator
NCT00369707	Andrew M. Evens, DO, MS	Principal Investigator
NCT00371033	John Kusek, PhD	Study Director
NCT00371033	Lee Nyberg, PhD, MD	Study Director
NCT00372515	Bruce Johnson, MD	Principal Investigator
NCT00372593	Alan S. Gamis, MD, MPH	Study Chair
NCT00372593	Richard Aplenc, MD, MSCE	Study Chair
NCT00372619	Bassem I. Razzouk, MD	Study Chair
NCT00372619	Todd Cooper, DO	Study Chair
NCT00372905	Jane Winter, MD	Principal Investigator
NCT00375674	Pfizer CT.gov Call Center	Study Director
NCT00376688	Gini Fleming	Principal Investigator
NCT00376961	Steven H. Bernstein, MD	Study Chair
NCT00376961	Richard I. Fisher, MD	Study Chair
NCT00378105	Paul Richardson, MD	Principal Investigator
NCT00378209	Paul Richardson, MD	Principal Investigator
NCT00378482	AstraZeneca AstraZeneca	Study Director
NCT00378703	Keith Flaherty	Principal Investigator
NCT00379340	David Dix, MD	Principal Investigator
NCT00380029	Raj S. Pruthi, MD	Principal Investigator
NCT00380679	William M Cassidy, MD	Principal Investigator
NCT00380679	Daniel Fishbein, MD	Principal Investigator
NCT00381108	Leland Ronningen, MD	Principal Investigator
NCT00381641	Jonas De Souza	Principal Investigator
NCT00381680	Glen Lew, MD	Principal Investigator
NCT00381797	Sridharan Gururangan	Principal Investigator
NCT00382018	Jeffrey B. Smerage, MD, PhD	Study Chair
NCT00382018	Daniel F. Hayes, MD	Study Chair
NCT00382018	Eric P. Winer, MD	Study Chair
NCT00382070	Norman Wolmark, MD	Principal Investigator
NCT00382109	Michael Pulsipher, MD	Principal Investigator
NCT00382200	Virginia Klimek, MD	Study Chair
NCT00383851	Gilad Gordon, MD	Study Director
NCT00383994	Issa F. Khouri, MD	Principal Investigator
NCT00384176	Jane Robertson	Study Director
NCT00385502	Michael H. Silverman, MD	Study Director
NCT00387075	Danna Jennings, MD	Principal Investigator
NCT00387205	Novartis Pharmaceuticals	Study Director
NCT00387530	William L. Read, MD	Study Chair
NCT00389038	Scott W. Powers, PhD, ABPP, FAHS	Principal Investigator
NCT00389610	Daniel A. Laheru, MD	Principal Investigator
NCT00390000	Julian Molina	Principal Investigator
NCT00390325	Manisha Shah	Principal Investigator
NCT00390455	Harold Burstein	Principal Investigator
NCT00390767	Sam L Teichman, MD	Study Director
NCT00390793	Farhad Ravandi-Kashani, MD	Principal Investigator
NCT00392015	Cindy Tamminga, MD, MPH	Principal Investigator
NCT00392054	Carlos A Morillo, MD	Principal Investigator
NCT00392054	Natale Andrea, MD	Principal Investigator
NCT00392340	Guy Makin, MD, PhD	Study Chair
NCT00392353	Lewis Silverman	Principal Investigator
NCT00392951	David T. Teachey, MD	Principal Investigator
NCT00392990	Leo Gordon, MD	Principal Investigator
NCT00393783	Teresa Gilewski, MD	Principal Investigator
NCT00394433	Peter Enzinger, MD	Principal Investigator
NCT00395538	Rachel I Gafni, M.D.	Principal Investigator
NCT00396019	Jean Tersak, M.D.	Principal Investigator
NCT00397579	Arthur E. Frankel, MD	Principal Investigator
NCT00397917	Jeffrey Murray, MD	Principal Investigator
NCT00398450	Gregory A. Daniels, MD, PhD	Principal Investigator
NCT00398567	Puma	Study Director
NCT00400374	Dong Shin, MD	Principal Investigator
NCT00400816	David M. Peereboom, MD	Study Chair
NCT00400946	Lewis B. Silverman, MD	Principal Investigator
NCT00401817	John P Leonard, MD	Principal Investigator
NCT00401843	Janssen Research &amp; Development, LLC Clinical Trial	Study Director
NCT00402779	Vassiliki Papadimitrakopoulou, M.D.	Principal Investigator
NCT00404417	Kevin R Cannard, MD	Principal Investigator
NCT00405327	James D Geiger, M.D.	Principal Investigator
NCT00405574	Gilad Gordon, MD	Study Director
NCT00405587	Henry Hsu, MD	Study Director
NCT00406809	Mack Mabry, MD	Study Director
NCT00407381	Diana Do, MD	Principal Investigator
NCT00407550	Julian Molina, MD, PhD	Principal Investigator
NCT00408005	Stuart Winter	Principal Investigator
NCT00408408	Norman Wolmark, MD	Principal Investigator
NCT00408499	David R. Gandara, MD	Study Chair
NCT00409383	Anna C Pavlick, MD	Principal Investigator
NCT00410462	Hans Gelderblom, MD, PhD	Study Chair
NCT00410553	Rakesh Goel	Principal Investigator
NCT00410605	Natalie Callander	Principal Investigator
NCT00410761	Clinical Sciences &amp; Operations	Study Director
NCT00410813	Anne F. Schott, MD	Study Chair
NCT00410813	Catherine Van Poznak, MD	Study Chair
NCT00410956	William R. Jarnagin, MD	Principal Investigator
NCT00411086	Nathan Fowler, MD	Principal Investigator
NCT00411632	William N. William Jr., MD	Principal Investigator
NCT00411723	Jana Preiningerova, M.D.	Principal Investigator
NCT00411723	David Mattson, M.D., Ph.D.	Principal Investigator
NCT00411723	Sharon Lynch, M.D.	Principal Investigator
NCT00411723	Christopher Bever, Jr., M.D., M.B.A.	Principal Investigator
NCT00411723	Theodore R Brown, M.D.	Principal Investigator
NCT00411723	Vijayshree Yadav, M.D.	Principal Investigator
NCT00414076	Robert Coleman, MD	Principal Investigator
NCT00414648	Frank McCormack, MD	Principal Investigator
NCT00414648	Bruce Trapnell, MD	Principal Investigator
NCT00416351	Steven M. Horwitz, MD	Principal Investigator
NCT00416455	Mostafa Atri	Principal Investigator
NCT00416598	William Blum	Principal Investigator
NCT00417560	Carolyn Bridges, MD	Principal Investigator
NCT00417794	Laura J McGuinn, PhD	Principal Investigator
NCT00418496	J. Paul Monk, M.D.	Principal Investigator
NCT00418886	Clinical Sciences &amp; Operations	Study Director
NCT00419562	Jay Skyler, M.D.	Study Chair
NCT00419562	Jeff Krischer, Ph.D.	Principal Investigator
NCT00422591	Farhad Ravandi-Kashani, MD	Principal Investigator
NCT00422799	Irene Ghobrial, MD	Principal Investigator
NCT00423293	Lisa A. Kachnic, MD	Study Chair
NCT00423397	William L. Read, MD	Study Chair
NCT00423514	Farid Boulad, MD	Principal Investigator
NCT00423735	Andrew Lassman	Principal Investigator
NCT00423891	Bristol-Myers Squibb	Study Director
NCT00423917	Winston Tan, MD, FACP	Study Chair
NCT00424164	Pierre Fumoleau, MD, PhD	Study Chair
NCT00424242	Jeffrey J. Raizer, MD	Principal Investigator
NCT00424515	F. Stephen Hodi, MD	Principal Investigator
NCT00425477	B. Douglas Smith, MD	Study Chair
NCT00425607	Mark W Kieran, MD, PhD	Study Chair
NCT00425672	Lupe Salazar	Principal Investigator
NCT00425802	Hugo R. Castro-Malaspina, MD	Principal Investigator
NCT00425802	Juliet Barker, MBBS	Principal Investigator
NCT00425802	Craig Moskowitz, MD	Principal Investigator
NCT00426764	Kenichi Takeshita, MD	Study Director
NCT00428298	Jennifer L Payne, MD	Principal Investigator
NCT00428922	Bhuvaneswari Ramaswamy, MD	Principal Investigator
NCT00430040	Paresh Dandona, MD, PhD	Principal Investigator
NCT00430183	James Eastham, MD	Study Chair
NCT00433511	Kathy Miller	Principal Investigator
NCT00433550	Robert McWilliams, MD	Study Chair
NCT00436267	Kenneth L. Pennington, MD	Study Chair
NCT00436332	Howard L. West, MD	Study Chair
NCT00436852	Elizabeth Fox, MD	Principal Investigator
NCT00438256	Theodore Hong, MD	Principal Investigator
NCT00438802	Thomas E. Witzig, MD	Study Chair
NCT00438841	William I. Bensinger, MD	Principal Investigator
NCT00439465	Kenneth Meehan, MD	Principal Investigator
NCT00439556	Issa F. Khouri, MD	Principal Investigator
NCT00439972	Robert H Knopp, MD	Principal Investigator
NCT00441142	Patrick Y Wen, MD	Principal Investigator
NCT00442130	Catherine J. Wu, MD	Principal Investigator
NCT00442533	Ebrahim Delpassand, M.D.	Principal Investigator
NCT00444535	Novartis Pharmaceuticals	Study Director
NCT00445458	Puma	Study Director
NCT00445692	Leona Holmberg	Principal Investigator
NCT00445887	Gus Rodriguez, MD	Study Chair
NCT00446446	MD	Study Director
NCT00448357	Thomas C. Shea, MD	Principal Investigator
NCT00448734	Robert Earhart, MD	Study Director
NCT00449007	Maria A. Oquendo, MD	Principal Investigator
NCT00449657	Paul Walker, MD	Principal Investigator
NCT00450398	Stefan Hemmerich, PhD	Study Director
NCT00450450	Stephan A. Grupp, MD PhD	Principal Investigator
NCT00450463	Ravi A Madan, M.D.	Principal Investigator
NCT00451555	Call 1-877-CTLILLY (1-877-285-4559) or 1-317-615-4559 Mon - Fri 9 AM - 5 PM Eastern time (UTC/GMT - 5 hours, EST)	Study Director
NCT00452023	Srdan Verstovsek, MD	Principal Investigator
NCT00452413	Call 1-877-CTLILLY (1-877-285-4559) or 1-317-615-4559 Mon - Fri 9 AM - 5PM Eastern time (UTC/GMT- 5 hours,EST)	Study Director
NCT00453154	Neal Ready	Principal Investigator
NCT00453388	Hans-Peter Kiem	Principal Investigator
NCT00454168	Craig S. Rosenfeld, MD	Study Chair
NCT00454389	Pravin Dugel, MD	Principal Investigator
NCT00454389	Jeffrey A Nau, MMS	Study Director
NCT00455312	Jakub Tolar, M.D., Ph.D.	Principal Investigator
NCT00455325	Clay F. Semenkovich, MD	Principal Investigator
NCT00455689	Hadine Joffe, M.D., M.Sc.	Principal Investigator
NCT00457639	Abhimanyu Garg, M.D.	Principal Investigator
NCT00457769	Anna M Barrett, MD	Principal Investigator
NCT00458653	David Avigan, MD	Principal Investigator
NCT00460031	Jorge Garcia, MD	Principal Investigator
NCT00460031	Matthew M. Cooney, MD	Principal Investigator
NCT00460174	William Small, MD	Study Chair
NCT00460239	Eric C Strain, M.D.	Principal Investigator
NCT00461045	Steven D Reich, MD	Study Director
NCT00463814	Emerging Oncology Medical Science Director, MD	Study Director
NCT00464620	Scott Schuetze, MD, PhD	Principal Investigator
NCT00464711	Dan Iosifescu, MD	Principal Investigator
NCT00465491	Dr. Hazel Breitz, M.D.	Study Director
NCT00466661	Bryan K Tolliver, M.D., Ph.D.	Principal Investigator
NCT00466661	Kathleen T Brady, M.D., Ph.D.	Study Director
NCT00466895	Leslie Andritsos, MD	Principal Investigator
NCT00466921	Timothy M. Kuzel, MD	Study Chair
NCT00467051	Carlos Rodriguez-Galindo, MD	Principal Investigator
NCT00468117	James F. Markmann, MD, PhD	Principal Investigator
NCT00468169	Everett E Vokes, MD	Principal Investigator
NCT00468715	Tiffany A. Traina, MD	Principal Investigator
NCT00468910	Hemant Roy	Principal Investigator
NCT00469859	Patrick A. Brown, MD	Study Chair
NCT00469859	Donald Small, MD, PhD	Study Chair
NCT00470015	Svetomir Markovic, MD, PhD	Study Chair
NCT00470496	Hassan Arshad	Principal Investigator
NCT00470704	Nancy Lin, MD	Principal Investigator
NCT00471497	Novartis Pharmaceuticals	Study Director
NCT00474747	Paolo Anderlini, MD	Principal Investigator
NCT00474929	Thomas E. Witzig, MD	Principal Investigator
NCT00474929	Shaji K. Kumar, MD	Principal Investigator
NCT00475020	Uday Popat, MD	Principal Investigator
NCT00476190	Daniel DeAngelo, MD	Principal Investigator
NCT00476996	Clinical Trials	Study Director
NCT00477412	Michael Wang, MD, MS	Principal Investigator
NCT00477750	Vivek Roy, MD, FACP	Study Chair
NCT00477750	Philip R. Greipp, MD	Principal Investigator
NCT00477750	Craig B. Reeder, MD	Principal Investigator
NCT00477815	Angela Dispenzieri, MD	Study Chair
NCT00478426	Amit Oza	Principal Investigator
NCT00478465	Jose G Montoya, MD	Principal Investigator
NCT00478946	Robert Earhart, MD, PhD	Study Director
NCT00479128	Arlene Siefker-Radtke, MD	Principal Investigator
NCT00479817	MD	Study Director
NCT00481091	Mack Mabry, MD	Study Director
NCT00481832	Wen-Kai Weng	Principal Investigator
NCT00482092	Priya Raina	Study Director
NCT00482378	Angela Dispenzieri, M.D.	Study Chair
NCT00482950	Hans-Peter Guler, MD	Study Director
NCT00483223	Steven Isakoff, MD, PhD	Principal Investigator
NCT00483366	Ralph Hauke, MD	Principal Investigator
NCT00483366	Elizabeth C. Reed, MD	Study Chair
NCT00485264	Sharon A. Nachman, MD	Study Chair
NCT00485264	Andrew Wiznia, MD	Study Chair
NCT00486603	Myrna Rosenfeld, MD, PhD	Study Chair
NCT00486642	Kim Chi	Principal Investigator
NCT00486668	Norman Wolmark, MD	Principal Investigator
NCT00486889	Medical Monitor	Study Director
NCT00487305	Eric Jacobsen, MD	Principal Investigator
NCT00489307	Sriram Yennurajalingam, MD	Principal Investigator
NCT00490061	Quynh-Thu Le	Principal Investigator
NCT00490139	Novartis Pharmaceuticals	Study Director
NCT00490529	Ronald Levy	Principal Investigator
NCT00491816	Priyanka Sharma, M.D.	Principal Investigator
NCT00492050	Sheeba Thomas, MD	Principal Investigator
NCT00492167	Shakeel Modak, MD	Study Chair
NCT00492167	Brian H. Kushner, MD	Principal Investigator
NCT00492349	L. Elliot Hong, M.D.	Principal Investigator
NCT00492999	Michael D'Angelica, MD	Principal Investigator
NCT00492999	Nancy E. Kemeny, MD	Principal Investigator
NCT00493064	Michael Gaynon, MD	Principal Investigator
NCT00493870	Joanne L Blum, MD	Principal Investigator
NCT00494182	George Blumenschein, MD	Principal Investigator
NCT00494234	James Carmichael, BSc, MBChB, MD, FRCP	Study Director
NCT00494234	Andrew Tutt, PhD MRCP FRCR	Principal Investigator
NCT00494442	James Carmichael, BSc MBChB MD FRCP	Study Director
NCT00494442	Andrew Tutt, PhD MRCP FRCR	Principal Investigator
NCT00495170	Joe Y. Chang, MD, PhD	Principal Investigator
NCT00495716	Anna Wald, MD, MPH	Principal Investigator
NCT00496366	Deborah Toppmeyer, MD	Principal Investigator
NCT00496769	Bristol-Myers Squibb	Study Director
NCT00497952	Suzanne T. Ildstad, M.D.	Study Director
NCT00497952	Joanne Kurtzberg, MD	Principal Investigator
NCT00498316	Elizabeth Shpall, MD	Principal Investigator
NCT00499083	Elizabeth C. Reed, MD	Principal Investigator
NCT00499083	Kenneth H. Cowan, MD, PhD	Principal Investigator
NCT00499135	Glenn Liu	Principal Investigator
NCT00499525	William J. Gradishar, MD	Study Chair
NCT00499603	Ana Gonzalez-Angulo, M.D.	Principal Investigator
NCT00499616	Clare Twist, MD	Study Chair
NCT00499616	Mary Lou Schmidt, MD	Study Chair
NCT00499655	Karen Reckamp	Principal Investigator
NCT00500045	Michael Gaynon, MD	Principal Investigator
NCT00500344	Rajendra S. Apte, MD, PhD	Principal Investigator
NCT00500890	Michael E. Rytting, MD	Principal Investigator
NCT00501059	Bayer Study Director	Study Director
NCT00501410	Scott Kopetz, MD	Principal Investigator
NCT00504751	Richard Furman, MD	Principal Investigator
NCT00504894	Kane Pryor, M.D.	Principal Investigator
NCT00505063	Rachel Kobos, MD	Principal Investigator
NCT00507728	Paul Cinciripini, PhD	Principal Investigator
NCT00509093	Anjali Advani, MD	Principal Investigator
NCT00509093	Brenda Cooper, MD	Principal Investigator
NCT00509899	Srdan Verstovsek, MD, PhD	Principal Investigator
NCT00509899	Ayalew Tefferi, MD	Principal Investigator
NCT00510718	Medical Director	Study Director
NCT00511992	D. Scott McMeekin, MD	Principal Investigator
NCT00513240	Dean B. Andropoulos, M.D.	Principal Investigator
NCT00513292	Aman Buzdar	Principal Investigator
NCT00513383	Lori J. Wirth, MD	Principal Investigator
NCT00513461	John Hoefs	Principal Investigator
NCT00513578	Craig S. Rosenfeld, MD	Study Chair
NCT00513695	Jennifer Specht	Principal Investigator
NCT00513747	John C. Byrd, MD	Study Chair
NCT00513786	David O'Malley, MD	Principal Investigator
NCT00514046	Brigitte C Widemann, M.D.	Principal Investigator
NCT00514072	James L. Gulley, MD, PhD, FACP	Principal Investigator
NCT00514449	Konasale Prasad, MD	Principal Investigator
NCT00514774	Penelope Hogarth, M.D.	Principal Investigator
NCT00515021	James A Muldowney, III, MD	Principal Investigator
NCT00515281	Michael D. Schreiber, M.D.	Principal Investigator
NCT00515528	Thomas Gajeweski, MD, PhD	Principal Investigator
NCT00516100	Ronald B. Natale, MD	Principal Investigator
NCT00516373	Jane Robertson, BSc, MBCHB, MD	Study Director
NCT00516373	Dr. Johann De Bono, PhD MRCP FRCR	Principal Investigator
NCT00516477	Albert M Maguire, MD	Principal Investigator
NCT00516607	Roy Rampling, MD, PhD	Study Chair
NCT00518583	John Macdonald, MD	Study Director
NCT00520104	Javelin Pharmaceuticals	Study Director
NCT00520130	Lauren M Curtis, M.D.	Principal Investigator
NCT00520767	Jeffrey A. Zonder, MD	Principal Investigator
NCT00520910	Brian Berman, M.D., Ph.D.	Principal Investigator
NCT00520975	Ingrid Mayer	Principal Investigator
NCT00524277	Elizabeth A Mittendorf, MD, FACS	Principal Investigator
NCT00524277	George E Peoples, MD, FACS	Study Director
NCT00525577	Walker Long, MD	Study Chair
NCT00526591	Jorge A. Garcia, MD	Principal Investigator
NCT00527566	Michael Wechsler, MD	Principal Investigator
NCT00528580	Jerry Krishnan, MD	Principal Investigator
NCT00528866	Mark Hurwitz, MD	Principal Investigator
NCT00528866	Oliver Sartor, MD	Study Chair
NCT00528866	Ying Xiao, PhD	Study Chair
NCT00528957	Erin Quirk, MD	Study Director
NCT00528983	Barry Skikne, M.D., FACP; FCP (SA)	Study Director
NCT00529035	John Koreth, MBBS, D.Phil	Principal Investigator
NCT00530868	Andres Forero, M.D.	Principal Investigator
NCT00531284	Naseem Zojwalla	Study Director
NCT00532675	Novartis Pharmaceuticals	Study Director
NCT00533949	Jeffrey Bradley, MD	Principal Investigator
NCT00533949	Hak Choy, MD	Study Chair
NCT00533949	Gregory A. Masters, MD	Study Chair
NCT00533949	Steven E. Schild, MD	Study Chair
NCT00533949	Alex A. Adjei, MD, PhD	Study Chair
NCT00533949	Jeffrey A. Bogart, MD	Study Chair
NCT00533949	Arthur William Blackstock, MD	Study Chair
NCT00533949	Mark A. Socinski, MD	Study Chair
NCT00536341	Ian W. Flinn, M.D.	Study Chair
NCT00536874	Eileen O'Reilly, MD	Principal Investigator
NCT00536874	Peter J. Allen, MD	Principal Investigator
NCT00536952	Bharat B. Mittal, MD	Study Chair
NCT00536991	Saby George	Principal Investigator
NCT00538720	Nancy D. Perrier, MD	Principal Investigator
NCT00538824	Ruben Niesvizky, MD	Principal Investigator
NCT00539591	Alberto Pappo, MD	Principal Investigator
NCT00540007	Todd Fehniger, M.D., Ph.D.	Principal Investigator
NCT00540930	Carol L Shields, MD	Principal Investigator
NCT00540995	Anthony Stein	Principal Investigator
NCT00542451	Eric Winer, MD	Principal Investigator
NCT00543439	Pfizer CT.gov Call Center	Study Director
NCT00543504	Funda Meric-Bernstam, MD	Principal Investigator
NCT00544830	Przemyslaw W. Twardowski, MD	Principal Investigator
NCT00547066	William Wegener, MD, PHD	Study Chair
NCT00547378	Steven Siegel, MD	Study Chair
NCT00550537	David Carbone, M.D., Ph.D.	Study Chair
NCT00550615	Julie Vose, M.D.	Principal Investigator
NCT00551070	John Farley	Principal Investigator
NCT00551460	Jeffrey E. Lancet, MD	Study Chair
NCT00551460	Rami Komrokji, MD	Study Chair
NCT00551460	Cheryl L. Willman, MD	Study Chair
NCT00551460	Marilyn L. Slovak, PhD	Study Chair
NCT00553098	Lauri Burroughs	Principal Investigator
NCT00553150	Jann N. Sarkaria, MD	Study Chair
NCT00553202	Stella M. Davies, MBBS, PhD	Study Chair
NCT00553358	Novartis Pharmaceuticals	Study Director
NCT00553410	Marco Colleoni, MD	Study Chair
NCT00553462	Rogerio Lilenbaum, MD	Study Chair
NCT00553644	Vicki Morrison	Principal Investigator
NCT00553683	Andrew N. de la Torre, MD	Study Chair
NCT00553800	Hossein Borghaei, DO	Principal Investigator
NCT00554515	David F McDermott, MD	Study Chair
NCT00554515	Kim Margolin, MD	Principal Investigator
NCT00554515	Walter Urba, MD	Principal Investigator
NCT00554515	Marc Ernstoff, MD	Principal Investigator
NCT00554515	Theodore Logan, MD	Principal Investigator
NCT00554515	Joseph Clark, MD	Principal Investigator
NCT00554515	Janice Dutcher, MD	Principal Investigator
NCT00554515	Michael Wong, MD	Principal Investigator
NCT00554515	Allen Pantuck, MD	Principal Investigator
NCT00554515	Leslie Oleksowicz, MD	Principal Investigator
NCT00554515	Leonard Appleman, MD	Principal Investigator
NCT00554515	Geoffrey Weiss, MD	Principal Investigator
NCT00554515	Jeffrey Sosman, MD	Principal Investigator
NCT00554515	Ulka Vaishampayan, MD	Principal Investigator
NCT00554788	Ira Dunkel, MD	Principal Investigator
NCT00555399	Marta Penas-Prado, MD	Principal Investigator
NCT00555399	Vinay Puduvalli, MD	Study Chair
NCT00555581	Robert Spiera, MD	Principal Investigator
NCT00557193	Joanne Hilden, MD	Principal Investigator
NCT00557349	Roger de la Torre, MD	Principal Investigator
NCT00557492	Herbert J. Zeh, MD	Principal Investigator
NCT00558519	Wendy Stock, M.D.	Study Chair
NCT00558896	Martha Q. Lacy, MD	Study Chair
NCT00559117	Pierre Triozzi, Dr.	Principal Investigator
NCT00559117	Andrew Brenner, MD	Principal Investigator
NCT00559819	Asokumar Buvanendran, MD	Study Director
NCT00560586	Leila Kheirandish, MD	Principal Investigator
NCT00562328	Clive S. Zent, MD	Study Chair
NCT00562640	Roisin O'Cearbhaill, MB, BCh	Principal Investigator
NCT00562640	Richard J. O'Reilly, MD	Principal Investigator
NCT00563212	Rany Condos, MD	Principal Investigator
NCT00563784	Ritsuko R. Komaki, MD	Principal Investigator
NCT00565487	Yixing Jiang, M.D.	Principal Investigator
NCT00565773	Antonio Guasch, MD	Principal Investigator
NCT00566488	M. Louise Markert, MD, PhD	Principal Investigator
NCT00566540	Enver Ozer, MD	Principal Investigator
NCT00566618	Stacy Moulder, MD	Principal Investigator
NCT00566696	Brandon Triplett, MD	Principal Investigator
NCT00566852	Paul D. Brown, MD	Principal Investigator
NCT00566852	Christina A. Meyers, PhD	Study Chair
NCT00566852	Sherry Fox, RN, PhD	Study Chair
NCT00566852	Deepak Khuntia, MD	Study Chair
NCT00567190	Ru Walker, M.D.	Study Director
NCT00567359	Lecia V. Sequist, MD, MPH	Principal Investigator
NCT00567567	Julie Park, MD	Principal Investigator
NCT00567580	Alan Pollack, MD, PhD	Principal Investigator
NCT00567580	Leonard G. Gomella, MD	Study Chair
NCT00567580	Joycelyn L. Speight, MD, PhD	Study Chair
NCT00569127	James Yao	Principal Investigator
NCT00570258	Issam Makhoul, MD	Principal Investigator
NCT00570674	Roy B. Tishler, MD	Principal Investigator
NCT00571298	David J Sugarbaker, MD	Principal Investigator
NCT00572065	Gail Roboz, MD	Principal Investigator
NCT00572078	Elena G Chiorean, MD	Principal Investigator
NCT00572078	Daniela E Matei, MD	Principal Investigator
NCT00572169	Gareth Morgan, MD, PhD	Principal Investigator
NCT00572897	John Mascarenhas, MD	Principal Investigator
NCT00572897	Giovanni Barosi, MD	Study Chair
NCT00572897	Damiano Rondelli, MD	Study Chair
NCT00573794	Andreas Lazar, MD	Study Director
NCT00574119	Marvin W Kronenberg, MD	Principal Investigator
NCT00574288	Janssen Research &amp; Development, LLC Clinical Trial	Study Director
NCT00574496	Miguel-Angel Perales, MD	Principal Investigator
NCT00574496	Juliet Barker, MBBS	Principal Investigator
NCT00574496	Craig Moskowitz, MD	Principal Investigator
NCT00574496	Tanya Trippett, MD	Principal Investigator
NCT00574496	Farid Boulad, MD	Principal Investigator
NCT00574587	Joseph Sparano, MD	Principal Investigator
NCT00574769	Mitchell E Gross, MD, Ph.D	Principal Investigator
NCT00575393	Julian Molina, MD, PhD	Principal Investigator
NCT00575952	D. McMeekin	Principal Investigator
NCT00576225	Jack W. Singer, M.D.	Study Director
NCT00576680	Jennifer Chan, MD, PhD	Principal Investigator
NCT00576836	M. Louise Markert, MD, PhD	Principal Investigator
NCT00576979	Anthony S. Stein, MD	Study Chair
NCT00577005	Gerardo Gonzalez, MD	Principal Investigator
NCT00577200	Asokumar Buvanendran, M.D.	Principal Investigator
NCT00577278	Auayporn P. Nademanee, MD	Study Chair
NCT00577304	Jan Ohrstrom, PhD	Study Director
NCT00577382	F. Stephen Hodi, MD	Principal Investigator
NCT00577577	Richard Moxley, M.D.	Study Chair
NCT00577629	David Rizzieri, MD	Principal Investigator
NCT00579280	David Sheehan, MD	Principal Investigator
NCT00579527	M. Louise Markert, MD, PhD	Principal Investigator
NCT00580333	Paula D. Ryan, MD	Principal Investigator
NCT00580645	Sherry A McKee, PhD	Principal Investigator
NCT00580853	Sherry A McKee, PhD	Principal Investigator
NCT00580931	Steven S Schreiber, MD	Principal Investigator
NCT00583024	David M Lubaroff, PhD	Principal Investigator
NCT00583453	Douglas VanDaele, MD	Principal Investigator
NCT00583752	David M Lubaroff, PhD	Principal Investigator
NCT00586391	Carlos Ramos, MD	Principal Investigator
NCT00588770	Athanassios (Ethan) Argiris	Principal Investigator
NCT00588991	Keith Pratz	Principal Investigator
NCT00589056	Amit Maity	Principal Investigator
NCT00589121	Dian Wang, MD, PhD	Principal Investigator
NCT00589121	Scott Okuno, MD	Study Chair
NCT00589121	Burton L. Eisenberg, MD	Study Chair
NCT00589121	John M. Kane, MD	Study Chair
NCT00589121	David G. Kirsch, MD, PhD	Study Chair
NCT00589186	Toh Han Chong, MD, MBBS, MRCP	Study Chair
NCT00589875	E. Antonio Chiocca, MD, PhD	Principal Investigator
NCT00590824	Paul M Sondel, MD, PhD	Principal Investigator
NCT00590824	Mark R Albertini, MD	Study Chair
NCT00590954	Thomas Kaley, MD	Principal Investigator
NCT00591058	Burt Nabors, MD	Principal Investigator
NCT00591058	Glenn Lesser, MD	Principal Investigator
NCT00591058	Steven Rosenfeld, MD, PhD	Principal Investigator
NCT00591058	Sean Grimm, MD	Principal Investigator
NCT00591058	Maceij Mrugala, MD	Principal Investigator
NCT00591058	Jeremy Rudnick, MD	Principal Investigator
NCT00591058	Gerry Linette, MD	Principal Investigator
NCT00591292	Jonathan Lewis, MD	Study Director
NCT00591383	Jonathan Lewis, MD	Study Director
NCT00591422	Jonathan Lewis, MD, PhD	Study Director
NCT00591630	Issa F. Khouri, MD	Principal Investigator
NCT00592150	Robert M Carey, MD	Principal Investigator
NCT00592501	Annie W Chan, MD	Principal Investigator
NCT00593242	Charles M Cotten, MD MHS	Principal Investigator
NCT00593450	Daniel F Martin, MD	Study Chair
NCT00593450	Stuart L Fine, MD	Study Chair
NCT00593450	Maureen G Maguire, PhD	Study Director
NCT00593450	Glenn Jaffe,, MD	Study Director
NCT00593450	Juan E Grunwald, MD	Principal Investigator
NCT00593554	Sherif Farag, MD/PhD	Principal Investigator
NCT00595088	Donald Lamm, MD	Principal Investigator
NCT00596011	Nagi Kumar, PhD	Principal Investigator
NCT00596531	William H Martin, Ph.D.	Principal Investigator
NCT00596531	Yongbing Shi, M.D., Ph.D.	Principal Investigator
NCT00596622	Amit Anand, MD	Principal Investigator
NCT00599170	Anil Tulpule, MD	Principal Investigator
NCT00600496	Patricia LoRusso, DO	Principal Investigator
NCT00600496	Roger Cohen, MD	Principal Investigator
NCT00600496	Jeffrey Infante, MD	Principal Investigator
NCT00600496	Kevin Kim, MD	Principal Investigator
NCT00601094	Jay M. Lee, MD	Study Chair
NCT00601705	David J. Adelstein, MD	Principal Investigator
NCT00601900	Maura Dickler	Principal Investigator
NCT00601913	Mercedes Porosnicu, MD	Principal Investigator
NCT00601913	J. D. Browne, MD	Principal Investigator
NCT00602186	SAKINEH hajebrahimi, MD	Study Director
NCT00602459	John Byrd	Principal Investigator
NCT00602641	Alexander Stewart	Principal Investigator
NCT00602693	Claudio G. Brunstein, MD, PhD	Principal Investigator
NCT00602693	Margaret L. MacMillan, MD	Principal Investigator
NCT00602836	Tait D. Shanafelt, MD	Study Chair
NCT00602836	Han Win Tun, MD	Principal Investigator
NCT00602836	Jose F. Leis, MD, PhD	Principal Investigator
NCT00604591	Edward Huey, MD	Principal Investigator
NCT00605696	Michelle Ng Gong, MD, MS	Principal Investigator
NCT00608075	Caleb M Adler, MD	Principal Investigator
NCT00608205	David J. Adelstein, MD	Principal Investigator
NCT00608205	Panayiotis Savvides, MD	Principal Investigator
NCT00609336	Andrew Coveler	Principal Investigator
NCT00609791	Arti Hurria, MD	Principal Investigator
NCT00610493	Sarina Piha-Paul, MD	Principal Investigator
NCT00611208	Arthur E Frankel, MD	Principal Investigator
NCT00611208	Madeleine Duvic, MD	Principal Investigator
NCT00611208	Cesar Rodriguez, MD	Principal Investigator
NCT00611572	Handan Gunduz-Bruce, M.D.	Principal Investigator
NCT00612274	Stuart Seropian, M.D.	Principal Investigator
NCT00613080	Michael C. Garofalo, MD	Principal Investigator
NCT00613080	Adam C. Berger, MD	Study Chair
NCT00613080	Johanna Bendell, MD	Study Chair
NCT00614809	Wu yilong, MD	Principal Investigator
NCT00614822	Michael Guarino, MD	Principal Investigator
NCT00615784	Donald E. Tsai, MD, PhD	Principal Investigator
NCT00617409	Scott Antonia, M.D.	Principal Investigator
NCT00617942	William Sikov, MD	Principal Investigator
NCT00617981	Ronnie T Poon, M.D.	Study Director
NCT00617981	Riccardo Lencioni, M.D.	Study Director
NCT00618605	Lindsey Baden, MD	Study Chair
NCT00618605	Dan Barouch, MD, PhD	Study Chair
NCT00618605	Raphael Dolin, MD	Study Chair
NCT00620633	Susan Prockop, MD	Principal Investigator
NCT00621309	David L Eaton, PhD	Principal Investigator
NCT00621686	Evanthia Galanis, MD	Study Chair
NCT00622466	Barbara B. Haley, MD	Principal Investigator
NCT00622726	Helen A. Mintz-Hittner, M.D.	Principal Investigator
NCT00624013	Mayer Davidson, M.D.	Study Director
NCT00624715	Deepak D'Souza, M.D.	Principal Investigator
NCT00624923	Francine Welty, MD	Study Director
NCT00624923	Allison B. Goldfine, MD	Principal Investigator
NCT00624923	Ernest Schaefer, MD	Principal Investigator
NCT00624923	Melvin Clouse, MD	Principal Investigator
NCT00624923	Steven E. Shoelson, MD, PhD	Principal Investigator
NCT00625820	Rajiv Saran, MD	Principal Investigator
NCT00625846	Keith Bible	Principal Investigator
NCT00626197	Clinical Trials	Study Director
NCT00626483	Gordana Vlahovic, MD	Principal Investigator
NCT00626990	Wolfgang Wick	Study Chair
NCT00626990	Warren P. Mason, MD	Study Chair
NCT00626990	Michael A. Vogelbaum, MD, PhD	Study Chair
NCT00626990	S. Erridge	Study Chair
NCT00626990	Anna Nowak, MD	Study Chair
NCT00628251	Jane Robertson, BSc, MBCHB, MD	Study Director
NCT00628251	Stan Kaye, BSc, MB, FRCP, FRCR, SMedSCi	Principal Investigator
NCT00628498	William Tappe, M.D.	Study Chair
NCT00628498	Paul Richardson, M.D.	Principal Investigator
NCT00628914	Ian A Cook, MD	Principal Investigator
NCT00629343	Robert N Taub, MD	Principal Investigator
NCT00629798	Hugo Castro-Malaspina, MD	Principal Investigator
NCT00630032	Mario Campone, MD	Principal Investigator
NCT00630097	Gantt Galloway, PharmD	Principal Investigator
NCT00631072	Steven Balk, MD, PhD	Principal Investigator
NCT00631072	F. Stephen Hodi, MD	Principal Investigator
NCT00631852	Elizabeth Peralta, M.D.	Principal Investigator
NCT00633165	Jack Singer, M.D.	Study Chair
NCT00633594	Ian W Flinn, M.D.	Study Chair
NCT00634231	Mark W Kieran, MD, PhD	Study Chair
NCT00634270	Bruce Korf, MD	Principal Investigator
NCT00634270	Brian Weiss, MD	Principal Investigator
NCT00634270	Roger Packer, MD	Study Director
NCT00634634	Antoinette Tan, MD	Principal Investigator
NCT00635557	Andrew P. Beelen, MD	Study Director
NCT00636168	Bristol-Myers Squibb	Study Director
NCT00638547	Paul Orchard, MD	Principal Investigator
NCT00639639	Gordana Vlahovic, MD	Principal Investigator
NCT00639717	Gregory Yanik, MD	Principal Investigator
NCT00639743	Guy MEYER, MD PhD	Principal Investigator
NCT00639743	Stavros Konstantinides, MD, PhD	Principal Investigator
NCT00640003	Thomas O Crawford, M.D.	Principal Investigator
NCT00641147	Francis Giardiello	Principal Investigator
NCT00641160	George Tidmarsh, MD, PhD	Study Director
NCT00643097	Gordana Vlahovic, MD	Principal Investigator
NCT00644228	Brian G. Durie	Principal Investigator
NCT00644696	Rajen Mody, MD	Principal Investigator
NCT00645710	Jeffrey Wong	Principal Investigator
NCT00646230	Barry J. Maurer, MD, PhD	Study Chair
NCT00651261	Richard M. Stone, MD	Study Chair
NCT00652574	Anne S. Tsao, MD	Principal Investigator
NCT00653068	Alyssa Reddy, MD	Principal Investigator
NCT00654160	Robert McWilliams, MD	Principal Investigator
NCT00654732	Michelle Fanale, MD	Principal Investigator
NCT00655850	Francisco Robert, M.D.	Principal Investigator
NCT00655876	Mohan Suntharalingam, MD	Principal Investigator
NCT00655876	David H. Ilson, MD, PhD	Study Chair
NCT00656058	Ronald E Gress, M.D.	Principal Investigator
NCT00656786	Maria Colavincenzo, MD	Principal Investigator
NCT00656786	Vera Hirsh, MD	Principal Investigator
NCT00656786	Milan Anadkat, MD	Principal Investigator
NCT00656786	Serena Mraz, MD	Principal Investigator
NCT00656786	Cliff Perlis, MD	Principal Investigator
NCT00656786	Madeline Duvic, MD	Principal Investigator
NCT00656786	Jennifer Temel, MD	Principal Investigator
NCT00658814	Sucha Nand	Principal Investigator
NCT00658892	Svetomir Markovic, M.D., Ph.D.	Principal Investigator
NCT00658931	John L Shuster, MD	Principal Investigator
NCT00659828	Julio Licinio, MD	Principal Investigator
NCT00660101	Henry E Schea	Study Director
NCT00660283	Renato V LaRocca, MD	Principal Investigator
NCT00660673	Janet Benesh	Study Director
NCT00661193	Primo N. Lara, MD	Study Chair
NCT00661492	Mark T. Fleming, MD	Principal Investigator
NCT00662129	Donald W. Northfelt, MD, FACP	Study Chair
NCT00662506	Tracy Batchelor	Principal Investigator
NCT00662636	Charles Erlichman	Principal Investigator
NCT00663039	Henry Holcomb, M.D.	Principal Investigator
NCT00663689	Wu Yilong, MD	Principal Investigator
NCT00664326	Bayer Study Director	Study Director
NCT00666562	Tracy Downs	Principal Investigator
NCT00667251	Novartis pharmaceuticals	Study Director
NCT00667342	Michael Bishop, MD	Principal Investigator
NCT00667615	David Straus, MD	Principal Investigator
NCT00668421	Ronald Hoffman, MD	Principal Investigator
NCT00668850	Gerald Bernstein,, MD	Study Chair
NCT00668850	Jaime Davidson, MD	Study Director
NCT00668850	Philip Raskin, MD	Principal Investigator
NCT00668941	Robert Lindsay, MD, PhD	Principal Investigator
NCT00669162	Xinglei Shen, MD	Principal Investigator
NCT00669669	Hans-Peter Kiem	Principal Investigator
NCT00669734	Elizabeth Poplin	Principal Investigator
NCT00670748	Steven A Rosenberg, M.D.	Principal Investigator
NCT00672737	Anthony Doufas	Principal Investigator
NCT00673218	Robert G Townley, MD	Principal Investigator
NCT00674297	Doruk Erkan, MD	Principal Investigator
NCT00674297	Silvia Pierangeli, PhD	Principal Investigator
NCT00674479	Farhad Ravandi-Kashani, M.D.	Principal Investigator
NCT00674648	Susan Prockop, MD	Principal Investigator
NCT00675233	Hassan Arshad, MD	Principal Investigator
NCT00676715	Clinical Trials	Study Director
NCT00676975	Francis KL Chan, MD	Principal Investigator
NCT00677092	Jonathan Kay, MD	Principal Investigator
NCT00678730	Deepak D'Souza, M.D.	Principal Investigator
NCT00678743	Kevin C. Maki, PhD	Study Director
NCT00679029	Elizabeth Reed	Principal Investigator
NCT00679289	John Kirkwood, MD	Study Chair
NCT00680901	Novartis Pharmaceuticals	Study Director
NCT00680992	MD	Study Director
NCT00682435	Andrew Chang, M.D.	Principal Investigator
NCT00683670	Gerald P. Linette, M.D., Ph.D.	Principal Investigator
NCT00683761	Karen Fink, MD	Principal Investigator
NCT00683761	Adam Mamelak, MD	Principal Investigator
NCT00683761	Steven Rosenfeld, MD	Principal Investigator
NCT00683761	Jan Drappatz, MD	Principal Investigator
NCT00683761	Patrick Wen, MD	Principal Investigator
NCT00683761	Jeffrey Olson, MD	Principal Investigator
NCT00683761	Richard Wahl, MD	Principal Investigator
NCT00683761	Heather Jacene, MD	Principal Investigator
NCT00683761	Antonio Omuro, MD	Principal Investigator
NCT00683761	Edward Pan, MD	Principal Investigator
NCT00683761	Sean Grimm, MD	Principal Investigator
NCT00683761	Jeffrey Raizer, MD	Principal Investigator
NCT00683761	Nimish Mobile, MD	Principal Investigator
NCT00683761	Marc Chamberlain, MD	Principal Investigator
NCT00683761	Jay-Jiguang Zhu, MD	Principal Investigator
NCT00683761	John Fiveash, MD	Principal Investigator
NCT00683761	David Schiff, MD	Principal Investigator
NCT00683761	Michael Edgeworth, MD	Principal Investigator
NCT00683761	Mark Malkin, MD	Principal Investigator
NCT00683761	Maciej Mrugala, MD	Principal Investigator
NCT00683761	Steven Chmura, MD	Principal Investigator
NCT00683761	Thomas Gribbin, MD	Principal Investigator
NCT00684294	Minal Barve, MD	Principal Investigator
NCT00684983	Tufia Haddad	Principal Investigator
NCT00685776	Medical Monitor	Study Director
NCT00685919	David Robertson, MD	Principal Investigator
NCT00686166	Cynthia G. Leichman, MD	Study Chair
NCT00686374	Andreas Lazar	Study Director
NCT00686972	Dariush Elahi, PhD	Principal Investigator
NCT00689572	Nassima Ait-Daoud Tiouririne, M.D.	Principal Investigator
NCT00689936	Christian Jacques, MD	Study Director
NCT00691015	Zaid Al-Kadhimi, MD	Study Chair
NCT00691106	Joseph Jorizzo, MD	Principal Investigator
NCT00693654	Alan Fleischer, MD	Principal Investigator
NCT00693693	Steve Feldman, MD, PhD	Principal Investigator
NCT00694915	Mahesh Desai, MD	Principal Investigator
NCT00694915	N K Mohanty, MD	Principal Investigator
NCT00694915	Amillal Bhat, MD	Principal Investigator
NCT00694915	Sujata Patwardhan, MD	Principal Investigator
NCT00694915	Kim Mammen, MD	Principal Investigator
NCT00694915	Sushil Bhatia, MD	Principal Investigator
NCT00694915	B. R. Srivastav, MD	Principal Investigator
NCT00694915	Jitendra Amlani, MD	Principal Investigator
NCT00694915	Anup Kundu, MD	Principal Investigator
NCT00694915	H. K. Moorthy, MD	Principal Investigator
NCT00694915	Shrawan K. Singh, MD	Principal Investigator
NCT00694915	Purshottam K. Puri, MD	Principal Investigator
NCT00694915	Rajeev Sood, MD	Principal Investigator
NCT00694915	Padmaraj Hegde, MD	Principal Investigator
NCT00694915	Yathish Kumar, MD	Principal Investigator
NCT00695409	Amrita Y. Krishnan, MD	Principal Investigator
NCT00695786	Felipe Samaniego, MD	Principal Investigator
NCT00695877	Lindsey Baden, MD	Study Chair
NCT00695877	Dan Barouch, MD	Study Chair
NCT00696449	Steve Feldman, MD, PhD	Principal Investigator
NCT00697346	Medical Monitor	Study Director
NCT00697463	Elizabeth Shane, MD	Principal Investigator
NCT00697463	Adi Cohen, MD	Study Director
NCT00697684	David E Avigan, MD	Principal Investigator
NCT00698815	Rebecca Heist	Principal Investigator
NCT00699491	Cynthia Ma	Principal Investigator
NCT00699556	Sherry A McKee, PhD	Principal Investigator
NCT00700076	Deepak C D'Souza, M.D.	Principal Investigator
NCT00700596	Mohini Ranganathan, M.D.	Principal Investigator
NCT00701233	Dennis Dykstra, MD	Principal Investigator
NCT00702962	Chandra P Belani, MD	Principal Investigator
NCT00703222	Chrystal U Louis, MD	Principal Investigator
NCT00703326	Call 1-877-CTLILLY (1-877-285-4559) or 1-317-615-4559 Mon - Fri 9 AM - 5 PM Eastern time (UTC/GMT - 5 hours, EST)	Study Director
NCT00703625	Joel Picus, M.D.	Principal Investigator
NCT00703664	Beata Holkova	Principal Investigator
NCT00705926	Eric S. Rosenberg, MD	Study Chair
NCT00705926	H.T. Banks, PhD	Principal Investigator
NCT00705926	Marie Davidian, PhD	Principal Investigator
NCT00706030	Puma	Study Director
NCT00706147	Michael Benatar, MBChB, DPhil	Principal Investigator
NCT00706147	Merit Cudkowicz, MD, MSc	Principal Investigator
NCT00707876	William Strauss, MD	Study Director
NCT00708773	Federico Innocenti, MD, PhD	Principal Investigator
NCT00708994	Deepak D'Souza, MD	Principal Investigator
NCT00709592	Amir Toor, MD	Principal Investigator
NCT00709761	Novartis Pharmaceuticals	Study Director
NCT00710697	Robert Earhart, MD, PhD	Study Director
NCT00710892	Malcolm K Brenner, MD	Principal Investigator
NCT00711243	Mary Mulcahy, MD	Principal Investigator
NCT00711412	Mary Mulcahy, MD	Principal Investigator
NCT00711828	Craig Reeder	Principal Investigator
NCT00712582	Craig Moskowitz, MD	Principal Investigator
NCT00712933	GSK Clinical Trials	Study Director
NCT00713193	Spero R Cataland, MD	Principal Investigator
NCT00714246	Chandra P. Belani, MD	Principal Investigator
NCT00715442	Eric Jonasch, MD	Principal Investigator
NCT00715988	Robert Ward, M.D.	Principal Investigator
NCT00716976	David R. Freyer, DO, MS	Study Chair
NCT00718484	Jonathan J Lewis, MD, PhD	Study Director
NCT00720226	Robert A. Wise, MD	Principal Investigator
NCT00720356	Jeffrey J. Raizer, MD	Principal Investigator
NCT00720876	Robert Chen, MD	Principal Investigator
NCT00720941	Novartis Pharmaceuticals	Study Director
NCT00721409	Pfizer CT.gov Call Center	Study Director
NCT00721513	Mercedes Porosnicu, MD	Principal Investigator
NCT00721799	Yusuf Menda, M.D.	Principal Investigator
NCT00721799	John M. Buatti, M.D.	Principal Investigator
NCT00722137	Medical Monitor	Study Director
NCT00722865	Jeremy Abramson, MD	Principal Investigator
NCT00723177	Sandra D Comer, PhD	Principal Investigator
NCT00723229	Christine Johnston, MD, MPH	Principal Investigator
NCT00723255	Edwin Alvarez	Principal Investigator
NCT00724568	Moshe Talpaz, MD	Principal Investigator
NCT00726232	Lance Leopold, MD	Study Director
NCT00726388	Javelin Pharmaceuticals	Study Director
NCT00726596	Mark Stein, MD	Principal Investigator
NCT00726687	Jonathan Lewis, MD	Study Chair
NCT00727948	Chris E Holmes, MD, PhD	Principal Investigator
NCT00728507	Susan Dorman, MD	Principal Investigator
NCT00728728	Christine Marx, MD MA	Principal Investigator
NCT00729118	Craig C. Hofmeister, MD	Principal Investigator
NCT00729586	Gini Fleming	Principal Investigator
NCT00729612	Gregory A. Otterson, MD	Principal Investigator
NCT00729716	Avner Yayon, PhD MD	Study Director
NCT00729911	Andrea Natale, MD	Principal Investigator
NCT00729911	Luigi Di Biase, MD, PhD	Principal Investigator
NCT00730639	Bristol-Myers Squibb	Study Director
NCT00731302	C M Stein, M.D.	Principal Investigator
NCT00731731	Evanthia Galanis	Principal Investigator
NCT00731952	David R Jones, MD	Principal Investigator
NCT00732121	Richard E Pratley, MD	Principal Investigator
NCT00732498	Soham D Puvvada, MD	Principal Investigator
NCT00732654	Robert Wood, MD	Principal Investigator
NCT00733408	Jennifer Specht	Principal Investigator
NCT00733746	Peter W.T. Pisters, MD	Study Chair
NCT00736645	James L. Mohler, MD	Principal Investigator
NCT00736944	Douglas Adkins, M.D.	Principal Investigator
NCT00737529	Lei Zhang, MD	Study Director
NCT00740064	Benjamin Young, MD, PhD	Principal Investigator
NCT00740441	Greg Smith, MD	Principal Investigator
NCT00740441	Harry Drabkin, MD	Principal Investigator
NCT00740805	Mark Stein	Principal Investigator
NCT00741260	Puma	Study Director
NCT00741403	Karen Gelmon, M.D.	Principal Investigator
NCT00741403	Avi Retter, M.D.	Principal Investigator
NCT00741403	Divis K Khaira, M.D.	Principal Investigator
NCT00741403	Senzer Neil, M.D.	Principal Investigator
NCT00742404	James R. Berenson, MD	Principal Investigator
NCT00742560	Louie Naumovski, MD	Study Director
NCT00742573	Carlos Blanco, MD, PhD	Principal Investigator
NCT00743340	Erin Quirk, MD	Study Director
NCT00743496	Michael Bishop, MD	Principal Investigator
NCT00745134	Sunil Krishnan, MD	Principal Investigator
NCT00745420	Mary Horowitz, MD	Study Director
NCT00745615	Giancarlo Comi	Principal Investigator
NCT00746746	Adam I Riker, MD	Principal Investigator
NCT00748189	Novartis Pharmaceuticals	Study Director
NCT00748657	Jubilee Brown	Principal Investigator
NCT00749892	Arlene Siefker-Radtke, MD	Principal Investigator
NCT00749957	J Timothy Stout, MD, PhD, MBA	Principal Investigator
NCT00752206	Kristin Baird, MD	Principal Investigator
NCT00755040	Madan Jagasia, MD	Principal Investigator
NCT00756509	Novartis Pharmaceuticals	Study Director
NCT00756600	Andrew Davidson, MD	Principal Investigator
NCT00756600	Mary Ellen McCann, MD	Principal Investigator
NCT00756600	Neil Morton, MD	Principal Investigator
NCT00757549	Jann N. Sarkaria, MD	Study Chair
NCT00759291	Joshua A. Beckman, M.D.	Principal Investigator
NCT00759642	Priyanka Sharma, MD	Principal Investigator
NCT00759772	Pouneh K Fazeli, MD	Principal Investigator
NCT00759798	William Wierda, M.D.	Principal Investigator
NCT00760981	David Miklos	Principal Investigator
NCT00761722	Barry Skikne, MD, FACP, FCP (SA)	Study Director
NCT00761774	UCB Cares	Study Director
NCT00764517	Stephen Spurgeon	Principal Investigator
NCT00765921	Ivana Kim, M.D.	Principal Investigator
NCT00766753	Frank Lieberman, MD	Principal Investigator
NCT00767624	Rachel Manber	Principal Investigator
NCT00767819	Novartis Pharmaceuticals	Study Director
NCT00767949	Glenn Stoller, MD	Study Director
NCT00769379	Melody Cobleigh	Principal Investigator
NCT00769483	Milind Javle, MD	Principal Investigator
NCT00769613	Kenneth G. Lucas, MD	Principal Investigator
NCT00770120	Sai-Hong I. Ou, MD, PhD	Study Chair
NCT00770120	Linda Garland, MD	Study Chair
NCT00770224	Jonathan W. Friedberg, MD	Study Chair
NCT00770224	Oliver W. Press, MD, PhD	Study Chair
NCT00770224	Lisa Rimsza, MD	Study Chair
NCT00770809	Lisa Carey	Principal Investigator
NCT00772486	Januario Castro, MD	Principal Investigator
NCT00772915	Shaji K. Kumar, MD	Study Chair
NCT00773422	Sherry A McKee, PhD	Principal Investigator
NCT00774345	Kenichi Takechita, MD	Study Director
NCT00775931	Paul Orchard, MD	Principal Investigator
NCT00776594	Mary-Ellen Taplin, MD	Principal Investigator
NCT00776867	Ira Dunkel, MD	Principal Investigator
NCT00777036	Bristol-Myers Squibb	Study Director
NCT00777101	Puma	Study Director
NCT00777153	Jane Robertson	Study Director
NCT00777153	Tracy Batchelor, MD, MPH	Principal Investigator
NCT00777491	John J. Coen, MD	Principal Investigator
NCT00777491	Philip J. Saylor, MD	Study Chair
NCT00777491	Cheryl T. Lee, MD	Study Chair
NCT00777491	Chin-Lee Wu, MD, PhD	Study Chair
NCT00777673	Jasgit C. Sachdev, MD	Principal Investigator
NCT00777881	Robert Redner, MD	Principal Investigator
NCT00779168	Przemyslaw W. Twardowski, MD	Principal Investigator
NCT00780234	Robert L. Keith, MD	Principal Investigator
NCT00782067	Novartis Pharmaceuticals	Study Director
NCT00782288	Pamela L Zeitlin, MD, PhD	Principal Investigator
NCT00782574	Jane Robertson, BSc, MBCHB, MD	Study Director
NCT00782574	Judy E Garber	Principal Investigator
NCT00782574	J Ballmana Gelpi	Principal Investigator
NCT00783367	Stephen J Schuster, MD	Principal Investigator
NCT00785291	Hope Rugo	Principal Investigator
NCT00787059	H. Kirk Hammond, MD	Study Director
NCT00787059	William Penny, MD	Principal Investigator
NCT00787059	Jay H Traverse, MD	Principal Investigator
NCT00787059	Clyde W Yancy, MD	Principal Investigator
NCT00787059	Matthew W Watkins, MD	Principal Investigator
NCT00787059	Eric D Adler, MD	Principal Investigator
NCT00787059	David R Murray, MD	Principal Investigator
NCT00787059	Amit Patel, MD	Principal Investigator
NCT00787969	David J. Inwards, MD	Study Chair
NCT00788112	Laura Esserman, MD, MBA	Principal Investigator
NCT00788125	Judith K. Sato, MD	Principal Investigator
NCT00788684	Mack Mabry, MD	Study Director
NCT00788775	F. Stephen Hodi, MD	Principal Investigator
NCT00789373	Call 1-877-CTLILLY (1-877-285-4559) or 1-317-615-4559 Mon - Fri 9 AM - 5 PM Eastern time (UTC/GMT - 5 hours, EST)	Study Director
NCT00789581	Denise A Yardley, M.D.	Study Chair
NCT00789633	Gaël Deplanque, MD	Principal Investigator
NCT00789776	Brenda Sandmaier	Principal Investigator
NCT00789958	Edgar Ben-Josef, MD	Principal Investigator
NCT00790010	F. Stephen Hodi, MD	Principal Investigator
NCT00790335	Suresh Vedantham, M.D.	Principal Investigator
NCT00790335	Clive Kearon, MB, MRCP, FRCP(C), PhD	Principal Investigator
NCT00790335	Samuel Z Goldhaber, M.D.	Study Chair
NCT00790582	Robert G Miller, MD	Study Director
NCT00790816	Novartis Pharmaceuticals	Study Director
NCT00790842	Joseph R. Mikhael, MD	Study Chair
NCT00790868	Michael W Otto, PhD	Study Chair
NCT00790868	David F Tolin, PhD	Principal Investigator
NCT00790868	Mark H Pollack, MD	Principal Investigator
NCT00790933	Medical Monitor	Study Director
NCT00791037	Mary Disis	Principal Investigator
NCT00791076	Dariush Elahi, PhD	Principal Investigator
NCT00791700	Pfizer CT.gov Call Center	Study Director
NCT00792142	Firoozeh Sahebi, MD	Principal Investigator
NCT00792701	Ralph G. Zinner, MD	Study Chair
NCT00792948	Farhad Ravandi-Kashani	Principal Investigator
NCT00793572	Marco Mielcarek	Principal Investigator
NCT00794339	Farrokh Dehdashti, MD	Principal Investigator
NCT00794339	David A. Mankoff, MD, PhD	Study Chair
NCT00794781	Eisai Medical Services	Study Director
NCT00794950	Alon Weizer, MD	Principal Investigator
NCT00796562	Heather Symons, M.D.	Principal Investigator
NCT00796978	Cynthia Owusu, MD, MSC	Principal Investigator
NCT00798655	Robert Ferris, MD	Principal Investigator
NCT00798720	Tien Hoang, M.D.	Principal Investigator
NCT00799110	David Avigan, MD	Principal Investigator
NCT00799617	Peter J Snyder, MD	Principal Investigator
NCT00802412	Robert M. Anthenelli, MD	Principal Investigator
NCT00803972	Jolene K Berg, MD	Principal Investigator
NCT00804336	Jennifer Ang Chan, MD, MPH	Principal Investigator
NCT00805129	Dean Bajorin, MD	Principal Investigator
NCT00805194	Boehringer Ingelheim	Study Chair
NCT00807365	Dariush Elahi, PhD	Principal Investigator
NCT00807365	Kenneth L. Minaker, MD	Principal Investigator
NCT00807586	Daniel P Melby, MD	Principal Investigator
NCT00807599	Hani Hassoun, MD	Principal Investigator
NCT00807768	Marcus Randall	Principal Investigator
NCT00807963	Emanuel P DeNoia, MD	Principal Investigator
NCT00808314	Timothy M Bateman, MD	Principal Investigator
NCT00808639	Toni Choueiri, MD	Principal Investigator
NCT00810797	George Somlo, MD	Principal Investigator
NCT00810888	Matthew L. Flaherty, MD	Principal Investigator
NCT00810888	Edward C. Jauch, MD, MS	Principal Investigator
NCT00813293	Rebecca A Miksad, MD, MPH	Principal Investigator
NCT00813423	Janice Mehnert	Principal Investigator
NCT00813826	Kevin Pojasek, PhD	Study Director
NCT00814294	Len Rosenberg, PhD, RPh	Study Director
NCT00814294	David Orloff, MD	Study Director
NCT00815035	Wesley Burks, MD	Principal Investigator
NCT00816595	Tait D. Shanafelt, MD	Study Chair
NCT00816595	Jose F. Francisco, M.D.	Principal Investigator
NCT00819546	Richard Stone, MD	Principal Investigator
NCT00820170	Monica Fornier, MD	Principal Investigator
NCT00820222	Novartis Pharmaceuticals	Study Director
NCT00820872	Edith A. Perez, MD	Study Chair
NCT00821964	Lupe Salazar	Principal Investigator
NCT00822120	Oliver W. Press, MD, PhD	Study Chair
NCT00822848	Christopher W. Ryan, MD	Principal Investigator
NCT00823212	Peter M Maurer, MPH	Study Director
NCT00823797	Maciej Mrugala	Principal Investigator
NCT00824135	Brandon Triplett, MD	Principal Investigator
NCT00824200	Theodore Johnson II, MD, MPH	Principal Investigator
NCT00824265	Novartis Pharmaceuticals	Study Director
NCT00824993	Huifang Lu, MD, PHD	Principal Investigator
NCT00825201	Mihaela Cristea, MD	Principal Investigator
NCT00825201	Mihaela Cristea, MD	Study Chair
NCT00825656	Martha White, MD	Principal Investigator
NCT00825721	Sanduk Ruit, MD	Principal Investigator
NCT00825721	Reeta Gurung, MD	Principal Investigator
NCT00825942	Ira Wong, MD	Study Director
NCT00825955	Bristol-Myers Squibb	Study Director
NCT00826202	Daniel C Javitt, MD, PhD	Principal Investigator
NCT00826241	Marta Penas-Prado, MD	Principal Investigator
NCT00826540	Axel Grothey, MD	Study Chair
NCT00827359	David F McDermott, MD	Principal Investigator
NCT00829166	Clinical Trials	Study Director
NCT00830544	Fernando Cabanillas, MD	Principal Investigator
NCT00831766	Jeffrey Lancet, M.D.	Principal Investigator
NCT00831792	Paul Corn, MD, PHD	Principal Investigator
NCT00833261	Lucien A. Nedzi, MD	Principal Investigator
NCT00834093	Jochen Lorch, MD	Principal Investigator
NCT00834665	Carl H June, MD	Study Chair
NCT00835770	Medical Director	Study Director
NCT00837928	John C. Grecula, MD	Principal Investigator
NCT00838435	Suyash Prasad, M.D.	Study Director
NCT00838656	Christopher Poole, MD	Principal Investigator
NCT00839956	Leona Holmberg	Principal Investigator
NCT00840931	Javier Pinilla, M.D., Ph.D.	Principal Investigator
NCT00841074	Catherine J Binkley, DDS, PhD	Principal Investigator
NCT00841802	Robert P Schleimer, PhD	Principal Investigator
NCT00843531	Emily K. Bergsland, MD	Principal Investigator
NCT00843882	Alan List	Principal Investigator
NCT00844831	John Wo, MD	Principal Investigator
NCT00846430	Albert S Cornelius, MD	Principal Investigator
NCT00847171	Leisha A. Emens, MD, PhD	Principal Investigator
NCT00847912	Martin A. Weinstock, MD	Study Chair
NCT00848328	Joseph M. Tuscano, MD	Principal Investigator
NCT00849121	Douglas McNeel, MD	Principal Investigator
NCT00851877	Hak Choy, MD	Principal Investigator
NCT00852787	Deepak Malhotra, MD, PhD	Principal Investigator
NCT00853125	Roger Strair, MD, PhD	Principal Investigator
NCT00853372	MD	Study Director
NCT00853580	Kathryn North, MD	Principal Investigator
NCT00853580	Maria Acosta, MD	Study Director
NCT00853580	Jonathan Payne, MD	Study Director
NCT00856245	Siddhartha Ganguly, MD	Principal Investigator
NCT00856401	John P Bilezikian, MD	Principal Investigator
NCT00856492	Zeina Nahleh, MD	Principal Investigator
NCT00857025	Marianna Koczywas, MD	Principal Investigator
NCT00857389	Laura L. Worth, MD, PhD	Principal Investigator
NCT00857545	Paul Sabbatini	Principal Investigator
NCT00858117	Olga Frankfurt, MD	Principal Investigator
NCT00858377	MD	Study Director
NCT00858429	Mary Mulcahy, MD	Principal Investigator
NCT00859222	Patrick Y. Wen, MD	Principal Investigator
NCT00859456	Robert N Taub, MD, PhD	Principal Investigator
NCT00859716	Mohamed Al-Ibrahim, MD	Principal Investigator
NCT00859937	Stuart Wong	Principal Investigator
NCT00860379	Maggie L Dylewski, PhD,RD	Principal Investigator
NCT00860522	David F Claxton, MD	Principal Investigator
NCT00861406	Wen-Jen Hwu, MD, PhD	Principal Investigator
NCT00861913	Amy Weise	Principal Investigator
NCT00862979	Novartis Pharmaceuticals	Study Director
NCT00863369	Leslie Popplewell, MD	Principal Investigator
NCT00863681	Bayer Study Director	Study Director
NCT00865566	Scott Hammer	Study Chair
NCT00865566	Magdalena Sobieszczyk	Study Chair
NCT00865566	Michael Yin	Study Chair
NCT00866697	Novartis Pharmaceuticals	Study Director
NCT00866749	Michael E. Rytting, M.D.	Principal Investigator
NCT00866879	Lorenzo Gallon, MD	Principal Investigator
NCT00866918	John Gregory, MD	Principal Investigator
NCT00867048	James D Neaton, PhD	Principal Investigator
NCT00867048	Abdel Babiker, PhD	Study Chair
NCT00867048	Sean Emery, PhD	Study Chair
NCT00867048	Fred Gordin, MD	Study Chair
NCT00867048	Jens Lundgren, MD, DMSc	Study Chair
NCT00867113	Novartis Pharmaceuticals	Study Director
NCT00867217	Qamar J Khan, MD	Principal Investigator
NCT00867529	David Maloney	Principal Investigator
NCT00868114	Emmanuel E Zervos, MD	Principal Investigator
NCT00869024	Ganesh Raveendran, MD	Principal Investigator
NCT00869206	Andrew L. Himelstein, MD	Study Chair
NCT00869401	Nadia N. Laack, MD	Study Chair
NCT00870779	David W Roberts, MD	Principal Investigator
NCT00870779	Keith Paulsen, PhD	Principal Investigator
NCT00870987	Judith Epstein, MD	Principal Investigator
NCT00871923	James Welsh, MD	Principal Investigator
NCT00872911	Elena Volpi, MD,PhD	Principal Investigator
NCT00872989	Robert L. Coleman, MD	Study Chair
NCT00873093	Terzah Horton	Principal Investigator
NCT00873275	Lily L. Lai, MD	Principal Investigator
NCT00876395	Novartis Pharmaceuticals	Study Director
NCT00876902	Stefan Hemmerich, PhD	Study Director
NCT00877006	Sponsor's Medical Expert	Study Director
NCT00877500	Funda Meric-Bernstam, MD	Principal Investigator
NCT00878163	Charles Erlichman	Principal Investigator
NCT00878709	Puma	Study Director
NCT00878904	Pamela N. Munster, MD	Principal Investigator
NCT00879177	William B White, M.D.	Principal Investigator
NCT00879489	Paul O. Schwarzenberger, M.D.	Principal Investigator
NCT00880464	Beth Overmoyer, MD	Principal Investigator
NCT00880581	Ronald Levy	Principal Investigator
NCT00880919	S. Charles Schulz, MD	Principal Investigator
NCT00881361	Judy Boughey, MD	Study Chair
NCT00881556	Angela Christiano, PhD	Principal Investigator
NCT00883129	Donald P. Tashkin, MD	Principal Investigator
NCT00883129	Robert M. Elashoff, PhD	Principal Investigator
NCT00883129	Michael D. Roth, MD	Principal Investigator
NCT00883298	Michael A. Badurddoja, MD	Principal Investigator
NCT00884312	Kanya Rajangam, MD	Study Director
NCT00884741	Mark Gilbert	Principal Investigator
NCT00885326	Julia L. Glade-Bender, MD	Principal Investigator
NCT00885495	Carl J Fichtenbaum, MD	Principal Investigator
NCT00885664	Carl J Fichtenbaum, MD	Principal Investigator
NCT00885703	Umesh G. Lalloo, MD, FRCP	Study Chair
NCT00885703	Robert A. Larsen, MD	Study Chair
NCT00886028	Enrique Estrada Lobato, M.D.	Study Chair
NCT00886028	Luis Alberto Medina Velázquez, PhD.	Study Chair
NCT00886028	Elena Arechaga Ocampo, PhD.	Study Chair
NCT00886028	Victoria López Rodrígez, Q.F.B.	Study Chair
NCT00886028	Luisa Geraldine Villanueva Rodríguez, M.D	Study Chair
NCT00886028	Miguel Angel Ríos Trejo, M.D.	Study Chair
NCT00886691	William P. Tew, MD	Study Chair
NCT00887159	Chandra Belani	Principal Investigator
NCT00887198	Janssen Research &amp; Development, LLC Clinical Trial	Study Director
NCT00887536	Norman Wolmark, MD	Principal Investigator
NCT00888173	Matthew Powell	Principal Investigator
NCT00888628	James F Markmann, MD, PhD	Principal Investigator
NCT00889408	Verokina Bachanova, MD	Principal Investigator
NCT00890032	Gordana Vlahovic, MD	Principal Investigator
NCT00890617	Frank A. Baciewicz, MD	Principal Investigator
NCT00890786	Maryam Fouladi, MD	Principal Investigator
NCT00890825	Dr Pasi Janne	Principal Investigator
NCT00890825	Gabriella Mariani	Study Director
NCT00891527	Kathy J Jenkins, MD, MPH	Principal Investigator
NCT00892177	Evanthia Galanis, MD	Study Chair
NCT00892736	Shannon Puhalla	Principal Investigator
NCT00895661	Jeremy Abramson, MD	Principal Investigator
NCT00899431	Issa F. Khouri, MD, BS	Study Chair
NCT00899847	Wen-Kai Weng	Principal Investigator
NCT00900809	Michael Boyiadzis, MD	Principal Investigator
NCT00901069	Hayslip W John, MD	Principal Investigator
NCT00901901	Bayer Study Director	Study Director
NCT00902018	James B Bussel, MD	Principal Investigator
NCT00902577	Elizabeth Gerstner	Principal Investigator
NCT00903461	Julie Bauman, MD	Principal Investigator
NCT00903968	Irene Ghobrial, MD	Principal Investigator
NCT00904033	Luke J Peppone, Ph.D.	Principal Investigator
NCT00904345	Shruti Jolly, MD	Principal Investigator
NCT00906945	Geoffrey L. Uy, M.D.	Principal Investigator
NCT00907166	Avi Retter, M.D.	Principal Investigator
NCT00907166	Neil Senzer, M.D.	Principal Investigator
NCT00908752	Bristol-Myers Squibb	Study Director
NCT00908791	Margit M McGowan, DO	Principal Investigator
NCT00909090	Billy R Hammond, Ph.D.	Principal Investigator
NCT00909831	Ravi Amaravadi, MD	Principal Investigator
NCT00910247	CNS Medical Director	Study Director
NCT00910429	Bayer Study Director	Study Director
NCT00910910	Oliver Kong, MD	Study Director
NCT00911820	Peter C. Enzinger, MD	Principal Investigator
NCT00912223	Mary Horowitz, MD, MS	Study Director
NCT00912340	Elisavet Paplomata, MD	Principal Investigator
NCT00912691	Eugene Arnold, MD	Principal Investigator
NCT00914940	Marie Bleakley, MD	Principal Investigator
NCT00914940	Warren Shlomchik, MD	Principal Investigator
NCT00915005	Zhongxing Liao, MD	Study Chair
NCT00915018	Puma	Study Director
NCT00915694	Jay F. Dorsey, MD, PhD	Principal Investigator
NCT00916123	Scott Tagawa, M.D.	Principal Investigator
NCT00916409	Roger Stupp, MD	Study Director
NCT00916409	Philip H. Gutin, MD	Study Director
NCT00916409	Eric T. Wong, MD	Study Director
NCT00916409	Herbert H. Engelhard, MD, PhD	Study Director
NCT00916409	Manfred Westphal, Prof. MD	Study Director
NCT00916578	Wendy Woodward, MD, PHD	Study Chair
NCT00916747	Mark Kieran, MD, PhD	Principal Investigator
NCT00917462	David Ilson, MD	Principal Investigator
NCT00918203	Call 1-877-CTLILLY (1-877-285-4559) or 1-317-615-4559 Mon - Fri 9 AM - 5 PM Eastern time (UTC/GMT - 5 hours, EST)	Study Director
NCT00918333	Shaji Kumar	Principal Investigator
NCT00918723	Mazyar Shadman	Principal Investigator
NCT00920023	Ralph Weissleder, MD, PhD	Principal Investigator
NCT00920699	Christopher A Ross, MD, PhD	Principal Investigator
NCT00920699	Kevin M Biglan, MD, MPH	Principal Investigator
NCT00920816	Pfizer CT.gov Call Center	Study Director
NCT00921310	Maria Baggstrom, M.D.	Principal Investigator
NCT00921557	George K. Siberry, MD	Study Chair
NCT00922883	Cynthia E Dunbar, M.D.	Principal Investigator
NCT00923247	Ravi A Madan, M.D.	Principal Investigator
NCT00923351	John Glod, M.D.	Principal Investigator
NCT00923364	Dennis D Hickstein, M.D.	Principal Investigator
NCT00923845	Daniel H Fowler, M.D.	Principal Investigator
NCT00924326	Steven A Rosenberg, M.D.	Principal Investigator
NCT00924703	Celeste Decker, MD	Study Director
NCT00925314	Gregory Daniels, MD, PhD	Principal Investigator
NCT00926380	Benjamin Z Leder, MD	Principal Investigator
NCT00926380	Robert M Neer, MD	Principal Investigator
NCT00928135	Joseph Zabner, M.D.	Principal Investigator
NCT00928135	Lakshmi Durairaj, M.D.	Study Director
NCT00928135	Jan L Launspach, R.N., CCRC	Study Chair
NCT00929214	Eric A. Strom, MD, BS	Principal Investigator
NCT00929344	Barbara J Mason, Ph.D.	Principal Investigator
NCT00930579	Dawn L Hershman, MD	Principal Investigator
NCT00931840	Richard M. Goldberg, MD	Principal Investigator
NCT00932113	Alice B. Gottlieb, M.D., PhD.	Principal Investigator
NCT00932828	Arvil W Burks, MD	Principal Investigator
NCT00934427	Jeff Gregory, MD	Study Director
NCT00934440	Peter J Van Veldhuizen, MD	Principal Investigator
NCT00934895	Deborah L. Toppmeyer, MD	Principal Investigator
NCT00936390	Alvaro A. Martinez, MD, FACR	Study Chair
NCT00936611	Irene Ghobrial, MD	Principal Investigator
NCT00936858	Jochen Lorch, MD	Principal Investigator
NCT00937937	Christopher Lao	Principal Investigator
NCT00938470	Steven R. Alberts, MD	Study Chair
NCT00939770	Yael P. Mosse, MD	Study Chair
NCT00939822	Cynthia M. Carlsson, MD, MS	Principal Investigator
NCT00940316	Al Benson, MD	Principal Investigator
NCT00940602	Novartis Pharmaceuticals	Study Director
NCT00940771	Janice Piatt, MD	Principal Investigator
NCT00941720	Ronald M. Sobecks, MD	Principal Investigator
NCT00942331	Jonathan Rosenberg	Principal Investigator
NCT00942357	Daniela Matei	Principal Investigator
NCT00942578	William L Dahut, M.D.	Principal Investigator
NCT00943319	Andrew Artz, MD	Principal Investigator
NCT00943618	Paul M Cinciripini, PhD	Principal Investigator
NCT00943722	Medical Director	Study Director
NCT00943943	Michael Andreeff, MD, PhD	Principal Investigator
NCT00944047	Qamar Khan, MD	Principal Investigator
NCT00944749	Danielle M Townsley, M.D.	Principal Investigator
NCT00945815	Anjali Advani, MD	Study Chair
NCT00946088	Deirdre Judith Lyell	Principal Investigator
NCT00946270	Srdan Verstovsek, MD	Principal Investigator
NCT00946647	Novartis Pharmaceuticals	Study Director
NCT00946673	Griffith R. Harsh	Principal Investigator
NCT00946712	Roy Herbst	Principal Investigator
NCT00947011	Dariush Elahi, PhD	Principal Investigator
NCT00948064	Guillermo Garcia-Manero, MD	Principal Investigator
NCT00948675	Call 1-877-CTLILLY (1-877-285-4559) or 1-317-615-4559 Mon - Fri 9 AM - 5 PM Eastern time (UTC/GMT - 5 hours, EST)	Study Director
NCT00948688	Lawrence Blaszkowsky, MD	Principal Investigator
NCT00948740	Jie Tang, M.D., M.Sc	Principal Investigator
NCT00948753	David Porter, MD	Principal Investigator
NCT00948922	Melissa Alsina, MD	Principal Investigator
NCT00949650	Boehringer Ingelheim	Study Chair
NCT00949702	Clinical Trials	Study Director
NCT00949949	Brian Costello	Principal Investigator
NCT00949988	Januario Castro, M.D.	Principal Investigator
NCT00949988	Thomas J Kipps, M.D., Ph.D.	Principal Investigator
NCT00950248	Bibiana Bielekova, M.D.	Principal Investigator
NCT00951015	GSK Clinical Trials	Study Director
NCT00951496	Joan Walker	Principal Investigator
NCT00954174	Matthew Powell	Principal Investigator
NCT00954226	William N. William Jr., MD	Study Chair
NCT00954278	Anne M Traynor, M.D.	Principal Investigator
NCT00954707	Daniel Simon, M.D.	Principal Investigator
NCT00954707	David Kandzari, M.D.	Principal Investigator
NCT00955006	Janine Maenza	Study Chair
NCT00956332	Sam L. Teichman, MD	Study Director
NCT00957359	Stephen Ross, MD	Principal Investigator
NCT00957359	Anthony Bossis, PhD	Study Chair
NCT00957359	Jeffrey Guss, MD	Study Director
NCT00957853	William N. William Jr., MD	Study Chair
NCT00960752	Richard Royal, MD	Principal Investigator
NCT00961220	Kevin Cooper	Principal Investigator
NCT00961961	Robert J. DeRubeis, PhD	Principal Investigator
NCT00961961	John M Zajecka, MD	Principal Investigator
NCT00962611	Bayer Study Director	Study Director
NCT00962845	Janice M. Mehnert, MD	Principal Investigator
NCT00963105	Kenichi Takeshita, M.D., MPH	Study Director
NCT00963274	Beata Holkova, MD	Principal Investigator
NCT00963274	Thomas C. Shea, MD	Principal Investigator
NCT00963274	Steven Grant, MD	Study Chair
NCT00963274	Sho Ma, MD, PhD	Principal Investigator
NCT00963274	Amy Kimball, MD, PhD	Principal Investigator
NCT00963274	Nishitha Reddy, MBBS	Principal Investigator
NCT00963781	David E Kandzari, MD	Principal Investigator
NCT00963781	Paul S. Teirstein, MD	Principal Investigator
NCT00963781	Eric J. Topol, MD	Principal Investigator
NCT00964080	Jaffer A. Ajani, MD	Principal Investigator
NCT00964353	David O Meltzer, MD, PhD	Principal Investigator
NCT00964886	Joseph H Atkinson, MD	Principal Investigator
NCT00965250	Giuseppe Giaccone, M.D.	Principal Investigator
NCT00966654	Dariush Elahi, PhD	Principal Investigator
NCT00966693	Jatin J. Shah, MD	Study Chair
NCT00967005	Marc N Potenza, MD, PhD	Principal Investigator
NCT00967005	Jon E Grant, MD, JD, MPH	Principal Investigator
NCT00967369	Michelle A. Fanale, MD	Study Chair
NCT00968110	Dale Umetsu, MD	Principal Investigator
NCT00968760	Partow Kebriaei, MD	Study Chair
NCT00968968	Novartis Pharmaceuticals	Study Director
NCT00970905	Steven Ades, MD MSc	Principal Investigator
NCT00971737	Leisha A. Emens, MD, PhD	Principal Investigator
NCT00972478	Daniel Persky	Principal Investigator
NCT00972933	Ahmad Tarhini, MD	Principal Investigator
NCT00974142	Michael Donahoe, MD	Principal Investigator
NCT00975819	Denise M Adams, MD	Principal Investigator
NCT00976131	Heather Greenlee, ND, PhD	Principal Investigator
NCT00976248	Steven Treon, MD	Principal Investigator
NCT00976573	Robert McWilliams, MD	Study Chair
NCT00977470	Lecia Sequist, MD	Principal Investigator
NCT00977574	Carol Aghajanian	Principal Investigator
NCT00977691	Courtney D Fitzhugh, M.D.	Principal Investigator
NCT00979212	Martin J. Edelman, MD	Principal Investigator
NCT00979992	John Chan	Principal Investigator
NCT00980395	Soham D Puvvada, MD	Principal Investigator
NCT00980538	Janssen R&amp;D Ireland Clinical Trial	Study Director
NCT00981058	Call 1-877-CTLILLY (1-877-285-4559) or 1-317-615-4559 Mon - Fri 9 AM - 5 PM Eastern time (UTC/GMT - 5 hours, EST)	Study Director
NCT00981747	Alicia K Gerke, MD	Principal Investigator
NCT00982111	Call 1-877-CTLILLY (1-877-285-4559) or 1-317-615-4559 Mon - Fri 9 AM - 5 PM Eastern time (UTC/GMT - 5 hours, EST)	Study Director
NCT00982787	Siegward M Elsas, M.D.	Principal Investigator
NCT00982982	Deepak C D'Souza, M.D	Principal Investigator
NCT00983580	Frank Sinicrope	Principal Investigator
NCT00984282	Bayer Study Director	Study Director
NCT00985517	Raymond T Bartus, Ph.D.	Study Director
NCT00986609	Joseph Baar, MD	Principal Investigator
NCT00987389	David Jayne, MD	Principal Investigator
NCT00987389	Peter Merkel, MD, MPH	Principal Investigator
NCT00987389	Michael Walsh, MD	Principal Investigator
NCT00987480	Faird Boulad, MD	Principal Investigator
NCT00987766	Laura Goff, MD	Principal Investigator
NCT00987948	Cecilia M Shikuma, M.D.	Principal Investigator
NCT00988052	Giancarlo Comi, Prof., MD	Principal Investigator
NCT00988208	Debora Barton, MD	Study Director
NCT00988429	Patrício Soares-da-Silva, MD, PHD	Study Director
NCT00988715	Brenda Sandmaier	Principal Investigator
NCT00989651	Katherine Bell-McGuinn	Principal Investigator
NCT00992446	Leona Holmberg	Principal Investigator
NCT00993759	Ronald Turner, MD	Principal Investigator
NCT00994643	Matthew Carabasi, MD	Principal Investigator
NCT00995150	Andrea Olariu, MD, PhD	Study Director
NCT00996073	Roger Brown	Study Director
NCT00997035	NV Prajna, DNB, FRC Ophth	Principal Investigator
NCT00997035	Nisha Acharya, MD, MS	Principal Investigator
NCT00997035	Tom Lietman, MD	Principal Investigator
NCT00997334	David Jackman, MD	Principal Investigator
NCT00998010	Albert Lai, MD, PhD	Principal Investigator
NCT00999609	Albert M Maguire, MD	Principal Investigator
NCT00999609	Stephen R Russell, MD	Principal Investigator
NCT00999804	Mothaffar Rimawi, MD	Principal Investigator
NCT01000051	Uday Popat, MD	Study Chair
NCT01000285	Lee Ratner, M.D., Ph.D.	Principal Investigator
NCT01000987	Sherry A McKee, PhD	Principal Investigator
NCT01001377	MD	Study Director
NCT01001442	Kenneth C. Anderson, MD	Study Director
NCT01001754	Jan Hillson, MD	Study Director
NCT01002547	Kenneth Cusi, PhD	Principal Investigator
NCT01002755	Alessandra Ferrajoli, MD	Study Chair
NCT01002924	Siu-Long Yao	Study Director
NCT01003912	Joanne Kurtzberg, MD	Principal Investigator
NCT01004172	Nancy Lin, MD	Principal Investigator
NCT01004874	Annick Desjardins, MD, FRCPC	Principal Investigator
NCT01004978	Jean-Francois (Jeff) Geschwind	Principal Investigator
NCT01005108	Jun J Mao, MD, MSCE	Principal Investigator
NCT01005472	Bartosz Chmielowski, MD	Principal Investigator
NCT01005576	Shalini Shenoy, MD	Principal Investigator
NCT01005797	Harry Drabkin, MD	Principal Investigator
NCT01007630	Grace S Liang, MD	Principal Investigator
NCT01008150	Norman Wolmark, MD	Principal Investigator
NCT01008917	Robin K Kelley, MD	Principal Investigator
NCT01008917	Alan P Venook, MD	Principal Investigator
NCT01009437	David A. Potter, M.D., Ph.D.	Principal Investigator
NCT01009788	Steven Isakoff, MD, PhD	Principal Investigator
NCT01009918	Maya Guglin, MD, PhD	Study Chair
NCT01009918	Pamela N. Munster, MD	Study Chair
NCT01010061	Clinical Trials	Study Director
NCT01010126	Charles Erlichman	Principal Investigator
NCT01010217	Stefan Ciurea, MD	Study Chair
NCT01011010	Hanna H. Sanoff, MD	Principal Investigator
NCT01011218	Oxana RG Palesh, PhD, MPH	Principal Investigator
NCT01011374	Lawrence J Singerman, MD	Principal Investigator
NCT01011439	Anna Petroccione, MD	Study Director
NCT01011439	Glen Weiss, MD	Principal Investigator
NCT01011439	Benjamin Besse, MD	Principal Investigator
NCT01011439	Julien Mazières, MD	Principal Investigator
NCT01011439	Silvia Novello, MD	Principal Investigator
NCT01011439	Arun Rajan, MD.	Principal Investigator
NCT01011439	Marina C Garassino, MD	Principal Investigator
NCT01013285	Albert Lai, MD	Principal Investigator
NCT01013441	Stephen J Schuster, MD	Principal Investigator
NCT01013441	Chitra Hosing, MD	Principal Investigator
NCT01013870	Claudia S Robertson, MD	Principal Investigator
NCT01014598	Chukwumere Nwogu	Principal Investigator
NCT01015118	Boehringer Ingelheim	Study Chair
NCT01015222	Filip Janku, MD,PHD	Principal Investigator
NCT01015833	Ghassan Abou-Alfa	Principal Investigator
NCT01016730	Erin Reid	Principal Investigator
NCT01016769	David Pfister, MD	Principal Investigator
NCT01017601	Julian Molina, MD, PhD	Study Chair
NCT01019187	Michael Perlis, MD	Principal Investigator
NCT01020539	Monica Bhatia, MD	Principal Investigator
NCT01021241	Anthony S Fiorino, MD, PhD	Study Director
NCT01021241	Alan Kivitz, MD	Principal Investigator
NCT01022021	Siddhartha Ganguly, MD	Principal Investigator
NCT01022138	Amy Weise, M.D.	Principal Investigator
NCT01022580	Roberta A Ballard, MD	Principal Investigator
NCT01023477	Kirsten H Edmiston, MD, FACS	Principal Investigator
NCT01023477	Priscilla McAuliffe, MD, PhD	Principal Investigator
NCT01024010	Tait Shanafelt, M.D.	Study Chair
NCT01024010	Jose Leis, M.D.	Principal Investigator
NCT01024010	Han W. Tun, M.D.	Principal Investigator
NCT01024036	Janssen Research &amp; Development, LLC Clinical Trial	Study Director
NCT01024231	Bristol-Myers Squibb	Study Director
NCT01024387	Matthew Kulke, MD	Principal Investigator
NCT01024998	Medical Monitor	Study Director
NCT01025427	Hiroyu Hatano, MD	Principal Investigator
NCT01025453	Eric Sherman, MD	Principal Investigator
NCT01026220	Kara Kelly, MD	Principal Investigator
NCT01026493	H. Ian Robins, MD, PhD	Principal Investigator
NCT01026987	John DiPersio, M.D., Ph.D.	Principal Investigator
NCT01027000	Edwin P. Alyea, MD	Study Chair
NCT01027702	Andrew Gilman, MD	Principal Investigator
NCT01027754	Shadi Nahvi, M.D., M.S.	Principal Investigator
NCT01027949	Kevin Laliberte, PharmD	Study Director
NCT01029054	Mark Kaminski, M.D.	Principal Investigator
NCT01029262	Albert Hoenekopp, MD	Study Director
NCT01030900	Wyndham H Wilson, M.D.	Principal Investigator
NCT01031069	GSK Clinical Trials	Study Director
NCT01031446	Ingrid Mayer, MD	Principal Investigator
NCT01032629	Janssen Research &amp; Development, LLC Clinical Trial	Study Director
NCT01034254	Mark C Steinhoff, MD	Principal Investigator
NCT01034631	Thomas Hutson, D.O.	Study Chair
NCT01036087	Naoto Ueno, MD, PHD	Study Chair
NCT01036113	Joyce A O'Shaughnessy, MD	Principal Investigator
NCT01036321	Nagi Kumar, Ph.D.	Principal Investigator
NCT01036594	Charles J. Ryan, MD	Principal Investigator
NCT01037621	Mary Jane Burton, M.D.	Principal Investigator
NCT01038388	Jonathan Kaufman, MD	Principal Investigator
NCT01038583	Richard Grimm, MD, PHD	Principal Investigator
NCT01038583	John McNeil, MBBS, PHD	Principal Investigator
NCT01039376	Novartis Pharmaceuticals	Study Director
NCT01040000	Philip M Arlen, M.D.	Study Director
NCT01040221	Eric Hollander, MD	Principal Investigator
NCT01041274	Donald C Goff, MD	Principal Investigator
NCT01041521	Christine A Wanke, MD	Principal Investigator
NCT01041781	Martin J. Edelman, MD	Study Chair
NCT01042158	Paul Hassoun, MD	Principal Investigator
NCT01042535	Hatem Soliman	Principal Investigator
NCT01043640	Paul Orchard, MD	Principal Investigator
NCT01044238	Walter Ling, M.D.	Principal Investigator
NCT01044238	Maureen Hillhouse, Ph.D.	Study Director
NCT01044433	Corey Langer	Principal Investigator
NCT01044745	Robert Bociek	Principal Investigator
NCT01046604	Ethan J Anderson, PhD	Principal Investigator
NCT01047319	Prof. Timothy Vollmer, MD	Principal Investigator
NCT01047722	Jeffrey A Klein, MD	Principal Investigator
NCT01048827	Thomas Martin, MD	Study Chair
NCT01049451	Regina R Berkovich, MD, PhD	Principal Investigator
NCT01049841	Ira Dunkel, MD	Principal Investigator
NCT01049854	Mitchell S Cairo, MD	Principal Investigator
NCT01049945	Shaji K. Kumar, M.D.	Study Chair
NCT01049945	Vivek Roy, M.D.	Principal Investigator
NCT01050647	Yasser Y El-Sayed, MD	Principal Investigator
NCT01050842	Erik P. Castle, M.D.	Study Chair
NCT01051557	Thomas Kaley	Principal Investigator
NCT01054079	K.C. Balaji, MD	Principal Investigator
NCT01054144	Rachid Baz, M.D.	Principal Investigator
NCT01055028	Kristen N. Ganjoo	Principal Investigator
NCT01056276	Jesus Berdeja, M.D.	Study Chair
NCT01056393	William Towner, MD	Principal Investigator
NCT01056965	Adam L. Boxer, M.D., Ph.D.	Principal Investigator
NCT01057225	Joseph R. Mikhael, M.D.	Study Chair
NCT01057862	Marc N Potenza, M.D., Ph.D.	Principal Investigator
NCT01058239	Jeremy Abramson, MD	Principal Investigator
NCT01058655	Brian Wolpin, MD	Principal Investigator
NCT01058707	Medical Monitor	Study Director
NCT01058941	Lynne Shinto, ND, MPH	Principal Investigator
NCT01059630	Clinical Trials	Study Director
NCT01059929	John P Kress, MD	Principal Investigator
NCT01060384	Julie M Vose	Principal Investigator
NCT01061411	Saby George	Principal Investigator
NCT01061775	M. Jennifer Abuzzahab, MD	Principal Investigator
NCT01061840	Minal Barve, MD	Principal Investigator
NCT01062399	Prakash Chinnaiyan, MD	Principal Investigator
NCT01062425	Tracy Batchelor	Principal Investigator
NCT01062451	Thomas F Newton, M.D.	Principal Investigator
NCT01064479	William N. William Jr., MD	Study Chair
NCT01064648	Anne Tsao	Principal Investigator
NCT01065129	Mark Schroeder, M.D.	Principal Investigator
NCT01065454	Bayer Study Director	Study Director
NCT01065467	F. Stephen Hodi, MD	Principal Investigator
NCT01065662	Susana Campos, MD	Principal Investigator
NCT01065844	John M. Buatti, M.D.	Principal Investigator
NCT01066637	Robert J Gropler, MD	Principal Investigator
NCT01067144	Ian R Carroll	Principal Investigator
NCT01067287	David Avigan, MD	Principal Investigator
NCT01067469	John DeGroot, MD	Study Chair
NCT01068249	Robert Coleman, MD	Study Chair
NCT01068327	Chi Lin	Principal Investigator
NCT01068769	Suzanne George, MD	Principal Investigator
NCT01069510	Craig Broberg, MD	Principal Investigator
NCT01071941	Kenneth K. Tanabe, MD	Principal Investigator
NCT01071954	MD	Study Director
NCT01072175	GSK Clinical Trials	Study Director
NCT01074047	C L Beach, PharmD	Study Director
NCT01074411	Don Dizon	Principal Investigator
NCT01074554	Wonder P Drake, MD	Principal Investigator
NCT01074970	Kathy D. Miller, M.D.	Study Chair
NCT01075321	Craig Reeder, M.D.	Study Chair
NCT01075321	Thomas E. Witzig, M.D.	Principal Investigator
NCT01075412	Michael M Graham, Ph.D., M.D.	Study Director
NCT01075412	Sarah McGuire, Ph.D.	Principal Investigator
NCT01076543	Sonali Smith	Principal Investigator
NCT01077154	MD	Study Director
NCT01078662	Jane Robertson, BSc, MBCHB, MD	Study Director
NCT01078662	Bella Kaufman, MD	Principal Investigator
NCT01079806	Bristol-Myers Squibb	Study Director
NCT01080391	A. Keith Stewart, MD	Principal Investigator
NCT01080391	S. Vincent Rajkumar, MD	Principal Investigator
NCT01080391	Philippe Moreau, MD	Principal Investigator
NCT01080391	Antonio Palumbo, MD	Principal Investigator
NCT01081262	David Gershenson	Principal Investigator
NCT01081951	Jane Robertson, BSc, MBCHB, MD	Study Director
NCT01081951	Amit Oza, MD	Principal Investigator
NCT01082679	Randy Brown, MD, PhD	Principal Investigator
NCT01083316	Vaishali Sanchorawala, MD	Principal Investigator
NCT01084057	Yuan Yuan, MD, PhD	Principal Investigator
NCT01084863	Investigational Site	Principal Investigator
NCT01084876	Investigational Site	Principal Investigator
NCT01086332	Sudershan K. Bhatia, M.D., PhD	Study Director
NCT01086605	Alvaro Moreno-Asptia, MD	Study Chair
NCT01087554	Filip Janku, MD, PHD	Principal Investigator
NCT01088802	Quon Harry, M.D.	Principal Investigator
NCT01088802	Arlene Forastiere, M.D.	Principal Investigator
NCT01088815	Daniel Laheru, MD	Principal Investigator
NCT01088815	Ana De Jesus-Acosta, MD	Principal Investigator
NCT01089101	Jason Fangusaro	Principal Investigator
NCT01089361	Daniel Talmor, MD, MPH	Principal Investigator
NCT01089647	Ann Romaker, MD	Principal Investigator
NCT01090128	Hung Khong, MD	Principal Investigator
NCT01090414	Siddhartha Mitra, MD	Study Director
NCT01091428	Medical Monitor	Study Director
NCT01091454	Alvaro Moreno Aspitia, MD	Study Chair
NCT01091792	Camilo E Fadul, MD	Principal Investigator
NCT01093183	Jue Wang	Principal Investigator
NCT01093521	Christopher H Goss, MD, MSc	Principal Investigator
NCT01093573	Brenda Cooper, MD	Principal Investigator
NCT01094288	Medical Monitor	Study Director
NCT01095120	Jaffer Ajani, MD	Study Chair
NCT01095224	Xia Jin, MD, PhD	Study Chair
NCT01095822	Victor Serebruany, MD, PhD	Study Director
NCT01096992	William G. Wierda, MD, PhD, BS	Study Chair
NCT01097057	Leona Holmberg	Principal Investigator
NCT01097486	Roger Brown	Study Director
NCT01097642	Jenny Chang, MD	Principal Investigator
NCT01097694	Elliot Israel, M.D	Principal Investigator
NCT01097694	Joshua Boyce, M.D	Principal Investigator
NCT01097746	Anil Sood, MD	Principal Investigator
NCT01098266	Antonio Lambiase, MD	Study Director
NCT01099358	Call 1-877-CTLILLY (1-877-285-4559) or 1-317-615-4559 Mon - Fri 9AM - 5 PM Eastern time (UTC/GMT - 5 hours, EST)	Study Director
NCT01099579	Bristol-Myers Squibb	Study Director
NCT01100502	Naomi Hunder, MD	Study Director
NCT01100528	Pierre Triozzi	Principal Investigator
NCT01100775	L. E. Hong, M.D.	Principal Investigator
NCT01100944	Arun Rajan, M.D.	Principal Investigator
NCT01101035	Medical Director	Study Director
NCT01101581	William Wegener, MD, PhD	Study Chair
NCT01101880	Pamela Becker	Principal Investigator
NCT01102374	Adit A Ginde, MD, MPH	Principal Investigator
NCT01102426	Óscar F. Ballester, M.D.	Principal Investigator
NCT01102426	Rubén Niesvizky, M.D.	Principal Investigator
NCT01103635	Robert Vonderheide, MD, DPhil	Principal Investigator
NCT01103687	Lindsey Baden	Study Chair
NCT01104155	Eisai US Medical Services	Study Director
NCT01104259	Jennifer Specht	Principal Investigator
NCT01105312	Winston Tan, MD, FACP	Study Chair
NCT01105546	Elena Santagostino, MD, PhD	Principal Investigator
NCT01106027	Mark Stegall, MD	Principal Investigator
NCT01106157	Michael J. Haller, MD	Principal Investigator
NCT01106833	Mary Horowitz, MD	Study Director
NCT01106872	Mohammed Milhem, MD	Principal Investigator
NCT01107457	Call 1-877-CTLILLY (1-877-285-4559) or 1-317-615-4559 Mon - Fri 9 AM - 5 PM Eastern time (UTC/GMT - 5 hours, EST)	Study Director
NCT01109004	Mary Horowitz, MD	Study Director
NCT01111058	Tanguy Seiwert, M.D.	Principal Investigator
NCT01111305	Amy D Klion, M.D.	Principal Investigator
NCT01111526	Lia Perez, MD	Principal Investigator
NCT01111994	Valerie Callender, MD	Principal Investigator
NCT01112306	Aline Frey	Study Director
NCT01112527	Tracy T. Batchelor, MD	Principal Investigator
NCT01113502	Noelle Frey, MD	Principal Investigator
NCT01113515	Vickie R Driver, DPM FACFAS	Principal Investigator
NCT01113970	Jonathan J. Lewis, MD, PhD	Study Director
NCT01114555	Shakeel Modak, MD	Principal Investigator
NCT01116648	Joyce Liu	Principal Investigator
NCT01118052	Ronald Alvarez	Principal Investigator
NCT01119664	Andrew Haas, MD, PhD	Principal Investigator
NCT01120184	Clinical Trials	Study Director
NCT01120236	Evan Yu	Principal Investigator
NCT01120249	Christopher W. Ryan, MD	Principal Investigator
NCT01120639	Scott Soltys	Principal Investigator
NCT01121120	Michael Schuster, MD	Principal Investigator
NCT01121224	Emmanouil S Brilakis, MD PhD	Study Chair
NCT01121588	Pfizer CT.gov Call Center	Study Director
NCT01122199	Shadia I Jalal, MD	Study Chair
NCT01122901	David Peereboom	Principal Investigator
NCT01124539	James J Vredneburgh, MD	Principal Investigator
NCT01124734	Joseph J Drabick, MD	Principal Investigator
NCT01125046	Priya Kumthekar, MD	Principal Investigator
NCT01125293	Irene Ghobrial, MD	Principal Investigator
NCT01125566	Boehringer Ingelheim	Study Chair
NCT01126736	Harish Dave	Study Director
NCT01127451	Harish Dave, MD	Study Director
NCT01127633	Call 1-877-CTLILLY (1-877-285-4559) or 1-317-615-4559 Mon - Fri 9 AM - 5 PM Eastern time (UTC/GMT - 5 hours, EST)	Study Director
NCT01128296	Herbert Zeh, MD	Principal Investigator
NCT01128582	Ronnie Fass, MD	Principal Investigator
NCT01129193	Craig Hofmeister	Principal Investigator
NCT01129453	Karen L Kotloff, M.D.	Principal Investigator
NCT01132014	Janos Tanyi, MD	Principal Investigator
NCT01132612	Novartis Pharmaceuticals	Study Director
NCT01132807	David J. Straus, MD	Principal Investigator
NCT01133275	Rami Komrokji, M.D.	Principal Investigator
NCT01133678	Everett Vokes, M.D.	Principal Investigator
NCT01134120	Call 1-877-CTLILLY (1-877-285-4559) or 1-317-615-4559 Mon - Fri 9 AM - 5 PM Eastern time (UTC/GMT - 5 hours, EST)	Study Director
NCT01134198	Wilfid N Raby, Md, PhD	Principal Investigator
NCT01134575	Hagop Kantarjian, MD	Study Chair
NCT01134614	Frank Hodi	Principal Investigator
NCT01136356	Eric Strain, M.D.	Principal Investigator
NCT01136733	Eisai Medical Services	Study Director
NCT01136772	Scott Stroup, MD, MPH	Principal Investigator
NCT01136772	Joseph P McEvoy, MD	Principal Investigator
NCT01136928	Adriana Andrade, MD, MPH	Principal Investigator
NCT01137682	Novartis Pharmaceuticals	Study Director
NCT01137695	Cheryl Rosenfeld, DO	Principal Investigator
NCT01137695	Jeffrey Rothman, MD	Principal Investigator
NCT01137695	Alan Schorr, DO	Principal Investigator
NCT01138605	Janssen R&amp;D Ireland Clinical Trial	Study Director
NCT01139294	Thomas J Abramo, MD	Principal Investigator
NCT01139970	Ivana Gojo	Principal Investigator
NCT01140178	Hassan Arshad, MD	Principal Investigator
NCT01140360	Kent Robertson, MD PhD	Principal Investigator
NCT01141309	Eric Sherman, MD	Principal Investigator
NCT01141491	William Tap, M.D.	Principal Investigator
NCT01142232	Attaya Suvannasankha, MD	Principal Investigator
NCT01142388	Steven Cohen	Principal Investigator
NCT01142401	Kerin Adelson	Principal Investigator
NCT01143402	Paul Chapman	Principal Investigator
NCT01143441	Bibiana Bielekova, M.D.	Principal Investigator
NCT01143779	Sarina Piha-Paul, MD	Principal Investigator
NCT01144338	Nardev Khurmi, MD	Study Director
NCT01145209	Inhye Ahn, M.D.	Principal Investigator
NCT01145430	Bhavana Pothuri	Principal Investigator
NCT01145495	Peter Martin	Principal Investigator
NCT01145508	Douglas McNeel	Principal Investigator
NCT01145807	Eduardo Tschen, MD	Principal Investigator
NCT01146054	Albert Koong	Principal Investigator
NCT01146652	Clinical Sciences and Operations	Study Director
NCT01147107	Van Vinh Chau Nguyen, MD, PhD	Principal Investigator
NCT01147107	Cecilia M Shikuma, M.D.	Principal Investigator
NCT01147107	Thuy Le, M.D.	Study Director
NCT01147211	Chih-Hsin Yang, MD, Ph.D	Principal Investigator
NCT01147822	Novartis Pharmaceuticals	Study Director
NCT01148225	Andy Payne, PhD	Study Director
NCT01148849	Robert Lechleider, MD	Study Director
NCT01149083	Jeffrey Weitzel	Principal Investigator
NCT01149850	Phioanh Nghiemphu	Principal Investigator
NCT01150045	Jeffrey Meyerhardt, MD, MPH	Study Chair
NCT01151605	Paresh Dandona, MBBS	Principal Investigator
NCT01152541	Peter Hersh, MD	Principal Investigator
NCT01153243	Leon Fogelfeld, MD	Study Director
NCT01153763	GSK Clinical Trials	Study Director
NCT01154140	Pfizer CT.gov Call Center	Study Director
NCT01154387	Stuart Flechner, MD	Principal Investigator
NCT01154816	Yael Mosse	Principal Investigator
NCT01154920	Vali Papadimitrakopoulou, MD	Study Chair
NCT01155180	Christos S Mantzoros, MD	Principal Investigator
NCT01155284	Alex Rabinovitch, MD	Principal Investigator
NCT01155284	Diane L Hahn, LPN	Study Director
NCT01155583	Frederic Reu	Principal Investigator
NCT01155583	Ehsan Malek, MD	Principal Investigator
NCT01155817	David Miklos	Principal Investigator
NCT01155817	George Chen	Principal Investigator
NCT01156142	Robert C. Miller, MD	Study Chair
NCT01156870	Clinical Sciences &amp; Operations	Study Director
NCT01157091	Sumanta Pal	Principal Investigator
NCT01157364	Medical Director	Study Director
NCT01157416	Michael S Scheeringa, MD, MPH	Principal Investigator
NCT01157429	Michael S Scheeringa, MD, MPH	Principal Investigator
NCT01157975	Mario Chojkier, MD	Principal Investigator
NCT01157975	Martina Buck, PhD	Principal Investigator
NCT01157975	Hesham Elkhayat, MD	Principal Investigator
NCT01158105	Alan Miller, MD, PhD	Principal Investigator
NCT01158118	Mark Schroeder, M.D.	Principal Investigator
NCT01158222	Brian Rini	Principal Investigator
NCT01158417	Paresh Dandona, MD	Principal Investigator
NCT01158651	Bruce R. Korf, MD, PhD	Study Chair
NCT01158651	Mark Kieran, MD	Principal Investigator
NCT01159028	Jorge Cortes, MD	Study Chair
NCT01159028	Maro Ohanian, MD	Principal Investigator
NCT01159522	Muh-Hwan Su, Ph.D.	Study Director
NCT01159990	Esper Kallas, MD, PhD	Study Chair
NCT01160211	Novartis Pharmaceuticals	Study Director
NCT01160458	Raffit Hassan, M.D.	Principal Investigator
NCT01160744	Call 1-877-CTLILLY (1-877-285-4559) or 1-317-615-4559 Mon - Fri 9 AM - 5 PM Eastern time (UTC/GMT - 5 hours, EST)	Study Director
NCT01161524	Haichen Yang, M.D., M.A.	Study Director
NCT01162785	Colin P. Dinney, MD	Study Chair
NCT01163084	Christopher Logothetis	Principal Investigator
NCT01163786	Manu Jain, MD, MS	Principal Investigator
NCT01163786	Jayesh Mehta, MD	Principal Investigator
NCT01165112	Ajay Gopal	Principal Investigator
NCT01166139	Robert Spiera, MD	Principal Investigator
NCT01167114	Eunice Kwak, MD, PhD	Principal Investigator
NCT01167192	Rebecca Aft, M.D.	Principal Investigator
NCT01167712	John Chan	Principal Investigator
NCT01167725	Alexander Stojadinovic, MD	Principal Investigator
NCT01168219	Ravi Vij	Principal Investigator
NCT01168232	Carolyn McCourt	Principal Investigator
NCT01168921	William G. Wierda, MD, PHD, BS	Study Chair
NCT01168973	Call 1-877-CTLILLY (1-877-285-4559) or 1-317-615-4559 Mon - Fri 9AM - 5PM Eastern time (UTC/GMT - 5 hours, EST)	Study Director
NCT01169259	JoAnn E. Manson, MD, DrPH	Principal Investigator
NCT01169259	Julie E. Buring, ScD	Principal Investigator
NCT01169402	Kevin M Watt, MD	Principal Investigator
NCT01169636	Yasuhiro Oki, MD	Principal Investigator
NCT01170663	Call 1-877-CTLILLY (1-877-285-4559) or 1-317-615-4559 Mon - Fri 9 AM - 5 PM Eastern time (UTC/GMT - 5 hours, EST)	Study Director
NCT01171092	Sunil Abhyankar, MD	Principal Investigator
NCT01171898	Aragon Pharmaceuticals, Inc Clinical Trial	Study Director
NCT01172938	Douglas Hough, MD	Study Director
NCT01173016	Paul Orchard, MD	Principal Investigator
NCT01173523	Leena Gandhi, MD, PhD	Principal Investigator
NCT01173692	Gary B. Gunn, MD	Principal Investigator
NCT01174082	Muzaffar H. Qazilbash, MD	Principal Investigator
NCT01174264	Manish Sharma	Principal Investigator
NCT01174940	Sunil Abhyankar, MD	Principal Investigator
NCT01175109	Deric M Park, MD	Principal Investigator
NCT01175148	Mehdi Hamadani, MD	Principal Investigator
NCT01175980	Patricia LoRusso	Principal Investigator
NCT01176461	Nikhil I. Khushalani, M.D.	Principal Investigator
NCT01176474	Nikhil Khushalani, M.D.	Principal Investigator
NCT01177397	Kristen Hege, M.D.	Study Director
NCT01177683	Sherif Farag, M.B., B.S.	Study Chair
NCT01178281	Robert P Gale, MD, Ph.D.	Study Director
NCT01178814	Mark Heaney, MD	Principal Investigator
NCT01180036	Fernando C. Fervenza, M.D., Ph.D.	Principal Investigator
NCT01180374	Mohini Ranganathan, M.D	Principal Investigator
NCT01180855	Richard R Bootzin, PhD	Principal Investigator
NCT01180959	Ahmed Kaseb, MBBS	Principal Investigator
NCT01181271	Yi-Bin A Chen, MD	Principal Investigator
NCT01182350	Mark W. Kieran, MD, PhD	Study Chair
NCT01182441	David R. Holmes, M.D.	Principal Investigator
NCT01182441	Vivek Y. Reddy, M.D.	Principal Investigator
NCT01183416	Brian Kushner, MD	Principal Investigator
NCT01183429	Brian Kushner, MD	Principal Investigator
NCT01183494	Manish Sharma, MD	Principal Investigator
NCT01183780	Call 1-877-CTLILLY (1-877-285-4559) or 1-317-615-4559 Mon - Fri 9 AM - 5 PM Eastern time (UTC/GMT - 5 hours, EST)	Study Director
NCT01183884	Brian Kushner, MD	Principal Investigator
NCT01183897	Brian Kushner, MD	Principal Investigator
NCT01184326	Joaquim Bellmunt, MD, PhD	Principal Investigator
NCT01185067	Scott L Hummel, MD, MS	Principal Investigator
NCT01185366	Amado Zurita, MD	Principal Investigator
NCT01185964	Call 1-877-CTLILLY (1-877-285-4559) or 1-317-615-4559 Mon - Fri 9 AM - 5 PM Eastern time (UTC/GMT - 5 hours, EST)	Study Director
NCT01186406	Annick Desjardins, MD, FRCPC	Principal Investigator
NCT01186562	Melena Bellin, MD	Principal Investigator
NCT01187199	Shannon Westin, MD	Principal Investigator
NCT01188252	Bayer Study Director	Study Director
NCT01188421	Eric C. Strain, M.D.	Principal Investigator
NCT01188876	Marcela G. del Carmen, MD, MPH	Principal Investigator
NCT01189266	Jack Su	Principal Investigator
NCT01189370	Peter J Van Veldhuizen, MD	Principal Investigator
NCT01189383	Joseph Fay, MD	Principal Investigator
NCT01190098	Nancy Foldvary-Schaefer, DO	Principal Investigator
NCT01190410	UCB Clinical Trial Call Center	Study Director
NCT01190449	Cara A. Rosenbaum, MD	Principal Investigator
NCT01191697	Peter Enzinger, MD	Principal Investigator
NCT01191801	Sunesis Medical Monitor, MD	Study Director
NCT01192555	Chrystal U. Louis, MD	Principal Investigator
NCT01192828	Johan VanHove, MD PhD MBA	Principal Investigator
NCT01193517	Michael Overman, MD	Principal Investigator
NCT01193842	Juan Ramos	Principal Investigator
NCT01194219	Irina Khanskaya, MD	Study Director
NCT01194570	Clinical Trials	Study Director
NCT01195415	Mark Zalupski	Principal Investigator
NCT01196390	Howard Safran	Principal Investigator
NCT01197170	Filip Janku, MD, PHD	Principal Investigator
NCT01197378	Craig Langman, MD	Principal Investigator
NCT01197560	Oliver Manzke, MD	Study Director
NCT01198028	Bonnie S. Glisson, MD, BS	Principal Investigator
NCT01198067	Sheeba K. Thomas, MD	Principal Investigator
NCT01198145	Robert C. Miller, MD	Study Chair
NCT01198158	George Philips	Principal Investigator
NCT01199146	Charles J Ryan, MD	Principal Investigator
NCT01199263	David Cohn	Principal Investigator
NCT01199575	Thomas J Kipps, MD, PhD	Study Director
NCT01199575	Danelle F James, MD, MAS	Principal Investigator
NCT01199614	John P Bilezikian, MD	Principal Investigator
NCT01200238	F. Stephen Hodi, MD	Principal Investigator
NCT01200329	Yago Nieto, MD, PHD	Principal Investigator
NCT01200355	Genovefa Papanicolaou, MD	Principal Investigator
NCT01201356	Novartis Pharmaceuticals	Study Director
[truncated: 2,806 more rows]

## Sheet: 2_Completed_LineByLine
NCT Number	Last name	Role
NCT00000431	David J. Margolis, MD	Principal Investigator
NCT00029614	Oscar G. Bukstein, MD	Principal Investigator
NCT00031629	Martee Hensley	Principal Investigator
NCT00039195	Craig Moskowitz, MD	Study Chair
NCT00040690	Simon Clawson	Study Chair
NCT00045305	Selina M. Luger, MD	Study Chair
NCT00054444	Peter Rose	Principal Investigator
NCT00059332	Jeffrey Saver, M.D.	Principal Investigator
NCT00059332	Sidney Starkman, M.D.	Principal Investigator
NCT00059332	Marc Eckstein, M.D.	Principal Investigator
NCT00059332	Samuel Stratton, MD	Principal Investigator
NCT00059332	Frank Pratt, MD	Principal Investigator
NCT00070109	Sylvain Baruchel, MD	Principal Investigator
NCT00071981	Craig L. Slingluff, MD	Study Chair
NCT00072384	Rima Jubran	Principal Investigator
NCT00073983	Shreyaskumar R. Patel, MD	Principal Investigator
NCT00073983	Elizabeth Fox, MD	Principal Investigator
NCT00074412	Hoosen M. Coovadia, MD, MBBS	Study Chair
NCT00074412	Laura Guay, MD	Study Chair
NCT00074412	Wafaie Fawzi, MD, PhD	Study Chair
NCT00074412	Yvonne Maldonado, MD	Study Chair
NCT00074412	Daya Moodley, MSc, PhD	Study Chair
NCT00074425	Salim Abdool Karim, MBChB, PhD	Study Chair
NCT00074425	Irving Hoffman, PA, MPH	Study Chair
NCT00074425	Lisa Maslankowski, MD	Study Chair
NCT00074425	Groesbeck Parham, MD	Study Chair
NCT00074425	Nancy Padian, PhD	Study Chair
NCT00074425	Gita Ramjee, PhD	Study Chair
NCT00074425	Taha Taha, MD	Study Chair
NCT00074581	Myron S. Cohen, MD	Study Chair
NCT00076232	Connie Celum, MD, MPH	Study Chair
NCT00076232	Anna Wald, MD, MPH	Study Chair
NCT00076817	Peter Anton, MD	Principal Investigator
NCT00077376	Stacy Moulder	Principal Investigator
NCT00077441	George Kim	Principal Investigator
NCT00078442	David Asmuth, MD	Study Chair
NCT00079040	Alan Sandler	Principal Investigator
NCT00080938	H. I. Robins, MD, PhD	Study Chair
NCT00081276	Lydia Usha	Principal Investigator
NCT00082758	Paul M Sondel, MD, PhD	Study Chair
NCT00082758	Suzanne Shusterman, MD	Study Chair
NCT00082797	Stuart A. Grossman, MD	Study Chair
NCT00082797	Jana Portnow, MD	Study Chair
NCT00083187	Francis J. Giles, MD	Study Chair
NCT00084136	Thomas B. Campbell, MD	Study Chair
NCT00084136	Timothy Flanigan, MD	Study Chair
NCT00084136	James Hakim, MscClinEpi, FRCP	Study Chair
NCT00084136	Nagalingeswaran Kumarasamy, MD	Study Chair
NCT00084721	Marwan Fakih, MD	Principal Investigator
NCT00085254	Louis Nabors, MD	Principal Investigator
NCT00085449	Sherif S. Farag, MD, PhD	Study Chair
NCT00085540	Howard Fine	Principal Investigator
NCT00085852	John J. Reilly, MD	Principal Investigator
NCT00086190	Irene Richard, MD	Principal Investigator
NCT00086190	William McDonald, MD	Principal Investigator
NCT00087100	David S. Miller, MD	Study Chair
NCT00087126	James V. Fiorica, MD	Study Chair
NCT00089505	Shahin Lockman, MD, MSc	Study Chair
NCT00089505	Frederick Sawe, MD	Study Chair
NCT00090987	Ariela Noy, MD	Study Chair
NCT00090987	Henry Koon, MD	Study Chair
NCT00091507	Harry Selker, MD, MSPH	Study Chair
NCT00091507	Ralph D'Agostino, PhD	Principal Investigator
NCT00091507	James Udelson, MD	Principal Investigator
NCT00091559	Medical Monitor	Study Director
NCT00091819	G. Ralph Corey, MD	Principal Investigator
NCT00091949	Walter N. Kernan, M.D.	Principal Investigator
NCT00092001	Pfizer CT.gov Call Center	Study Director
NCT00093496	Paul Haluska	Principal Investigator
NCT00094094	Pfizer CT.gov Call Center	Study Director
NCT00094172	Scott Zamvil, MD, PhD	Study Chair
NCT00094172	Emmanuelle Waubant, MD, PhD	Study Chair
NCT00094302	Sonja M. McKinlay, PhD	Principal Investigator
NCT00094458	Centocor Ortho Biotech Services, L.L.C. Clinical Trial	Study Director
NCT00094705	Anna Durbin, MD	Principal Investigator
NCT00094718	Anna Durbin, MD	Principal Investigator
NCT00094835	MD	Study Director
NCT00094861	MD	Study Director
NCT00095147	Bristol-Myers Squibb	Study Director
NCT00095199	Call 1-877-CTLILLY (1-877-285-4559) or 1-317-615-4559 Mon - Fri 9 AM - 5 PM Eastern time (UTC/GMT - 5 hours, EST)	Study Director
NCT00095628	Eric Winquist	Principal Investigator
NCT00095979	Don Dizon	Principal Investigator
NCT00096109	Elaina Gartner	Principal Investigator
NCT00096499	Tomasz Beer	Principal Investigator
NCT00096941	Mika Derynck, M.D.	Study Director
NCT00096954	Karin Rosen, MD, PhD	Study Director
NCT00096993	Virginia Patton, M.D.	Study Director
NCT00097019	Julie Hambleton, M.D.	Study Director
NCT00097877	Global Clinical Registry (GCR, 1452)	Study Director
NCT00097929	Medical Monitor	Study Director
NCT00097981	Johnson &amp; Johnson Pharmaceutical Research &amp; Development, L.L. C. Clinical Trial	Study Director
NCT00098046	Novartis Pharmaceuticals	Study Chair
NCT00098059	Novartis Pharmaceuticals	Study Director
NCT00098397	Massimo Cristofanilli	Principal Investigator
NCT00098761	Sri Gururangan, MRCP (UK)	Study Chair
NCT00098956	Glennwood Goss	Principal Investigator
NCT00099580	Lisa Porter, MD	Study Director
NCT00099632	Jane Hitti, MD, MPH	Study Chair
NCT00099632	Deborah McMahon, MD	Study Chair
NCT00099671	Irini Sereti, MD	Study Chair
NCT00099671	Michael M. Lederman, MD	Study Chair
NCT00099801	Novartis	Study Director
NCT00099983	John H. Krystal	Study Chair
NCT00100048	Medical Monitor	Study Director
NCT00100295	Wendy Weber, ND, MPH	Principal Investigator
NCT00100750	Banu Arun	Principal Investigator
NCT00100789	Omer Kucuk, MD	Principal Investigator
NCT00100945	Aminah Jatoi, MD	Study Chair
NCT00101010	Maria A. Rodriguez, MD	Study Chair
NCT00101153	Joseph Brandwein, MD	Study Chair
NCT00101270	Lisa McGregor	Principal Investigator
NCT00101283	Nasser H. Hanna, MD	Study Chair
NCT00101283	Scott Okuno, MD	Study Chair
NCT00101348	Alain Mita	Principal Investigator
NCT00101439	Medical Monitor	Study Director
NCT00101582	MD	Study Director
NCT00101595	Bristol-Myers Squibb	Study Director
NCT00101608	Bristol-Myers Squibb	Study Director
NCT00101660	Bristol-Myers Squibb	Study Director
NCT00101803	Novartis Pharmaceuticals	Study Director
NCT00102167	Medical Monitor	Study Director
NCT00102323	MD	Study Director
NCT00102336	MD	Study Director
NCT00102388	Novartis Pharmaceuticals	Study Director
NCT00102466	Novartis Pharmaceuticals	Study Director
NCT00102531	Renu Gupta, MD	Study Chair
NCT00102531	Richard Gorlick, MD	Principal Investigator
NCT00102609	Johnson &amp; Johnson Pharmaceutical Research and Development, LLC Clinical Trial	Study Director
NCT00102674	Steven Steinhubl, MD	Principal Investigator
NCT00102687	CL Beach	Study Director
NCT00102726	GSK Clinical Trials	Study Director
NCT00102739	GSK Clinical Trials	Study Director
NCT00102804	Call 1-877-CTLILLY (1-877-285-4559) or 1-317-615-4559 Mon - Fri 9 AM - 5 PM Eastern time (UTC/GMT - 5 hours, EST)	Study Director
NCT00102960	James McIntyre, MBChB, MRCOG	Principal Investigator
NCT00102960	Avy Violari, MBChB, FCP (SA)	Study Chair
NCT00102960	Mark F. Cotton, MBChB, MMed	Study Chair
NCT00103012	Scott R Penzak, Pharm.D.	Principal Investigator
NCT00103142	Michael A. Morse, MD	Study Chair
NCT00103194	Glenn Liu	Principal Investigator
NCT00103207	Suresh Ramalingam, MD	Study Chair
NCT00103259	Jill Gilbert	Principal Investigator
NCT00103311	Syma Iqbal, MD	Principal Investigator
NCT00103337	Maha Hussain	Principal Investigator
NCT00103402	Leroy Nyberg, MD PhD	Study Director
NCT00103402	John Kusek, PhD	Study Director
NCT00103454	GSK Clinical Trials	Study Director
NCT00103610	Medical Monitor	Study Director
NCT00103662	Medical Monitor	Study Director
NCT00103714	Amy Schaberg, BSN	Study Director
NCT00103818	Medical Monitor	Study Director
NCT00103844	Bristol-Myers Squibb	Study Director
NCT00103857	Medical Monitor	Study Director
NCT00103935	Lisa Porter, MD	Study Director
NCT00103948	Margaret Moline, Ph.D.	Study Director
NCT00104078	Medical Monitor, MD	Study Director
NCT00104182	Global Clinical Registry (GCR, 1452)	Study Director
NCT00104299	John H. Stone, MD, MPH	Study Chair
NCT00104299	Ulrich Specks, MD	Study Chair
NCT00104364	Medical Monitor	Study Director
NCT00104377	Paul H. Ratner, MD	Principal Investigator
NCT00104390	Michael J. Noonan, MD	Principal Investigator
NCT00104520	Karen McCoy, MD	Principal Investigator
NCT00104637	Steven M Kawut, M.D., M.S.	Principal Investigator
NCT00104650	MD	Study Director
NCT00104767	Edward Garon, MD	Principal Investigator
NCT00104897	Timothy Eisen	Study Chair
NCT00104910	Kathleen Moore	Principal Investigator
NCT00104962	Stacey Berg	Principal Investigator
NCT00104988	Joseph I. Clark, MD	Study Chair
NCT00104988	Laura F. Hutchins, MD	Principal Investigator
NCT00105053	Charles J. Link, M.D.	Study Chair
NCT00105079	Clinical Trials	Study Director
NCT00105092	Call 1-877-CTLILLY (1-877-285-4559) or 1-317-615-4559 Mon - Fri 9 AM to 5 PM Eastern Time (UTC/GMT - 5 hours, EST)	Study Director
NCT00105157	Medical Monitor	Study Director
NCT00105183	Elbert P Trulock III, MD	Principal Investigator
NCT00105196	Bristol-Myers Squibb	Study Director
NCT00105235	J. Richard Thistlethwaite, MD	Principal Investigator
NCT00105326	Johnson &amp; Johnson Pharmaceutical Research &amp; Development, L.L. C. Clinical Trial	Study Director
NCT00105443	Bayer Study Director	Study Director
NCT00105482	Stephanie O'Malley, PhD	Principal Investigator
NCT00105547	Ed Swabb, MD	Study Director
NCT00105950	GSK Clinical Trials	Study Director
NCT00105989	Call 1-877-CTLILLY (1-877-285-4559) or 1-317-615-4559 Mon - Fri 9 AM - 5 PM Eastern Time (UTC/GMT - 5 hours, EST)	Study Director
NCT00106002	Call 1-877-CTLILLY (1-877-285-4559) or 1-317-615-4559 Mon - Fri 9 AM - 5 PM Eastern time (UTC/GMT - 5 hours, EST)	Study Director
NCT00106119	Kong Y Chen, Ph.D.	Principal Investigator
NCT00106145	Medical Monitor	Study Director
NCT00106171	Joseph B. Margolick, MD, PhD	Principal Investigator
NCT00106184	Chester V. Oddis, MD	Principal Investigator
NCT00106184	Ann M. Reed, MD	Principal Investigator
NCT00106314	Paul A. Litka, MD	Study Director
NCT00106340	Novartis Pharmaceuticals	Study Director
NCT00106353	Pfizer CT.gov Call Center	Study Director
NCT00106366	Christoph Koenen, MD	Study Director
NCT00106392	Central Contact	Study Director
NCT00106431	Jean Nichols, Ph.D.	Study Director
NCT00106509	Medical Monitor	Study Director
NCT00106522	Clinical Trials	Study Director
NCT00106535	Clinical Trials	Study Director
NCT00106574	Clinical Trials	Study Director
NCT00106626	Medical Monitor	Study Director
NCT00106639	Pfizer CT.gov Call Center	Study Director
NCT00106704	Medical Monitor	Study Director
NCT00106860	Murray Stein, MD	Study Chair
NCT00107003	Teri N Kreisl, M.D.	Principal Investigator
NCT00107016	Novartis Pharmaceuticals	Study Director
NCT00107120	Daniel Ventura, PhD	Study Director
NCT00107159	Antoni Ribas, MD	Study Chair
NCT00107185	Joseph L. Lasky, MD	Principal Investigator
NCT00107211	Brian J. Czerniecki, MD, PhD	Principal Investigator
NCT00107263	Stephanie Hines, MD	Study Chair
NCT00107276	Anne F. Schott, MD	Study Chair
NCT00107276	Kathy S. Albain, MD	Study Chair
NCT00107341	Aminah Jatoi, MD	Study Chair
NCT00107380	Jonathan W. Friedberg, MD	Study Chair
NCT00107380	Richard I. Fisher, MD	Study Director
NCT00107419	Warren A. Chow, MD	Study Chair
NCT00107419	Ernest C. Borden, MD	Study Chair
NCT00107419	Vivien H.C. Bramwell, MB, BS, PhD, FRCP	Study Chair
NCT00107419	George D. Demetri, MD	Study Chair
NCT00107419	Margaret von Mehren, MD	Study Chair
NCT00107445	Christina Chu	Principal Investigator
NCT00107458	Jack M. Su, MD	Study Chair
NCT00107458	Heidi V. Russell, MD	Study Chair
NCT00107484	Karen A. Kurdziel, MD	Study Chair
NCT00107510	Vivek Roy, MD, FACP	Study Chair
NCT00107523	Stephen H. Petersdorf, MD	Principal Investigator
NCT00107536	Tanios Bekaii-Saab	Principal Investigator
NCT00107757	GSK Clinical Trials	Study Director
NCT00107770	Robert Ferrante, PhD MSc	Principal Investigator
NCT00107835	Alicia Barba, MD	Principal Investigator
NCT00107887	Valeria Saraceni, MD	Study Director
NCT00107887	Richard E Chaisson, M.D.	Principal Investigator
NCT00107887	Betina Durovni, M.D.	Study Chair
NCT00107952	G. Ralph Corey, MD	Principal Investigator
NCT00107978	G. Ralph Corey, MD	Principal Investigator
NCT00107991	Joel Gelfand, MD	Principal Investigator
NCT00108017	Medical Monitor	Study Director
NCT00108069	Katherine Warren, M.D.	Principal Investigator
NCT00108082	GSK Clinical Trials	Study Director
NCT00108160	Suzanne Bradley, MD	Principal Investigator
NCT00108732	Robert DiPaola	Principal Investigator
NCT00108810	David Borenstein, MD	Principal Investigator
NCT00108810	H F Farmer, MD	Principal Investigator
NCT00108810	Larry Gilderman, DO	Principal Investigator
NCT00108810	Soledad Lee, MD	Principal Investigator
NCT00108810	Joseph A Markenson, MD	Principal Investigator
NCT00108849	Global Clinical Registry (GCR, 1452)	Study Director
NCT00108914	GSK Clinical Trials	Study Director
NCT00108953	Bayer Study Director	Study Director
NCT00109005	Steven K Libutti, M.D.	Principal Investigator
NCT00109031	MD	Study Director
NCT00109096	Call 1-877-CTLILLY (1-877-285-4559) or 1-317-615-4559 Mon - Fri 9 AM - 5 PM Eastern time (UTC/GMT - 5 hours, EST)	Study Director
NCT00109135	Medical Monitor	Study Director
NCT00109161	Richard Dickson, M.D.	Principal Investigator
NCT00109161	Steven Pugh, M.D.	Principal Investigator
NCT00109161	Daniel Wynn, M.D.	Principal Investigator
NCT00109161	Theodore J. Phillips, M.D.	Principal Investigator
NCT00109161	Joanna Cooper	Principal Investigator
NCT00109161	James R. Storey	Principal Investigator
NCT00109161	Malcolm Gottesman, M.D.	Principal Investigator
NCT00109161	Herman Sullivan, M.D.	Principal Investigator
NCT00109161	Timothy Vollmer, M.D.	Principal Investigator
NCT00109161	Jeffery Dunn, M.D.	Principal Investigator
NCT00109161	S. Mitchell Freedman, M.D.	Principal Investigator
NCT00109161	Joseph Herbert, M.D.	Principal Investigator
NCT00109161	Omar Khan, M.D.	Principal Investigator
NCT00109161	Marcelo Kremenchutzky, M.D.	Principal Investigator
NCT00109161	Sharon Lynch, M.D.	Principal Investigator
NCT00109161	Alireza Minagar, M.D.	Principal Investigator
NCT00109161	Jeffrey English, M.D.	Principal Investigator
NCT00109161	Andrew Goodman, M.D.	Principal Investigator
NCT00109161	Michael Kaufman, M.D.	Principal Investigator
NCT00109161	Florian P. Thomas, M.D.	Principal Investigator
NCT00109161	Clyde Markowitz, M.D.	Principal Investigator
NCT00109161	Jayne Martin, M.D.	Principal Investigator
NCT00109161	Maria Melanson, M.D.	Principal Investigator
NCT00109161	MaryAnn Picone, M.D.	Principal Investigator
NCT00109161	Christopher Bever, M.D	Principal Investigator
NCT00109161	Gregg G. Blevins, M.D.	Principal Investigator
NCT00109161	Kasper Lloyd, M.D.	Principal Investigator
NCT00109161	Yves Lapierrre, M.D.	Principal Investigator
NCT00109161	John W. Rose, M.D.	Principal Investigator
NCT00109161	Michael Yeung, M.D.	Principal Investigator
NCT00109161	Neil Lava, M.D.	Principal Investigator
NCT00109161	Jonathan L. Carter, M.D.	Principal Investigator
NCT00109161	Francois Jacques, M.D.	Principal Investigator
NCT00109161	William Honeycutt, M.D.	Principal Investigator
NCT00109161	Istvan Pirko, M.D.	Principal Investigator
NCT00109161	Ed Fox, M.D.	Principal Investigator
NCT00109343	Medical Monitor	Study Director
NCT00109408	Clinical Trials	Study Director
NCT00109473	Lee Denson, M.D.	Principal Investigator
NCT00109486	GSK Clinical Trials	Study Director
NCT00109512	Laura Williams, MD	Study Director
NCT00109590	Russell Van Dyke, MD	Study Chair
NCT00109590	Gonzague J. Jourdain, MD	Study Chair
NCT00109681	James Pennington, MD	Study Director
NCT00109733	Sanja Dragnic, MD	Study Director
NCT00109811	H. Richard Alexander	Principal Investigator
NCT00109824	Kristie Blum	Principal Investigator
NCT00109837	Jerry Radich, MD	Study Chair
NCT00109837	Frederick R. Appelbaum, MD	Principal Investigator
NCT00109863	Mark R. Albertini, MD	Study Chair
NCT00109928	Daruka Mahadevan, MD, PhD	Study Chair
NCT00109954	Brian I. Carr, MD	Study Chair
NCT00109967	Stephen Ansell	Principal Investigator
NCT00109993	Mary Laughlin, MD	Principal Investigator
NCT00110019	Keith Flaherty	Principal Investigator
NCT00110045	Claudio Viscoli, MD	Study Chair
NCT00110058	Brenda Sandmaier, MD	Principal Investigator
NCT00110071	Ajay Gopal	Principal Investigator
NCT00110084	Vivek Roy, MD, FACP	Study Chair
NCT00110084	Philip J. Stella, MD	Study Chair
NCT00110084	Tom R. Fitch, M.D.	Principal Investigator
NCT00110084	Timothy J. Hobday, M.D.	Principal Investigator
NCT00110188	Frank Haluska, M.D.	Study Director
NCT00110214	William Kelly	Principal Investigator
NCT00110240	Novartis Pharmaceuticals	Study Director
NCT00110253	William Garland, MD	Principal Investigator
NCT00110266	Novartis Pharmaceuticals	Study Director
NCT00110279	Ruth A. Karron, MD	Principal Investigator
NCT00110305	Tibotec Pharmaceuticals, Ireland Clinical Trial	Study Director
NCT00110357	Call 1-877-CTLILLY (1-877-285-4559) or 1-317-615-4559 Mon - Fri 9 AM - 5 PM Eastern time (UTC/GMT - 5 hours, EST)	Study Director
NCT00110396	Bettina Stubinski, MD	Study Director
NCT00110422	Bristol-Myers Squibb	Study Director
NCT00110435	Medical Monitor	Study Director
NCT00110461	Margaretta Nyilas, MD	Study Director
NCT00110487	Medical Monitor	Study Director
NCT00110513	Robert C Tait, MD	Principal Investigator
NCT00110552	Barry Oken, MD	Principal Investigator
NCT00110617	Novartis Pharmaceuticals	Study Director
NCT00110695	Norman Wolmark, MD	Principal Investigator
NCT00110747	Tina Alster, MD	Principal Investigator
NCT00110760	Michael Gold, MD	Principal Investigator
NCT00110773	Tina Alster, MD	Principal Investigator
NCT00110799	GSK Clinical Trials	Study Director
NCT00110812	Jorge Tavel, MD	Study Chair
NCT00110877	Tibotec Pharmaceuticals Clinical Trial	Study Director
NCT00110942	MD	Study Director
NCT00110981	MD	Study Director
NCT00110994	Bayer Study Director	Study Director
NCT00111007	Bayer Study Director	Study Director
NCT00111020	Bayer Study Director	Study Director
NCT00111189	Johnson &amp; Johnson Pharmaceutical Research &amp; Development, L.L. C. Clinical Trial	Study Director
NCT00111579	Robert Walker, MD	Study Director
NCT00111618	Roberto Pili, MD	Principal Investigator
NCT00111631	Clinical Trials	Study Director
NCT00111644	Clinical Trials	Study Director
NCT00111670	Clinical Trials	Study Director
NCT00111683	Medical Monitor	Study Director
NCT00111696	Stergios Moschos, MD	Principal Investigator
NCT00111709	Medical Monitor	Study Director
NCT00111722	Medical Monitor	Study Director
NCT00111748	Klaus Hollmig, MD	Principal Investigator
NCT00111787	GSK Clinical Trials, MD	Study Director
NCT00111800	GSK Clinical Trials, MD	Study Director
NCT00111813	Medical Monitor	Study Director
NCT00111839	Joan Schiller, MD	Principal Investigator
NCT00111839	Mark Socinski, MD	Principal Investigator
NCT00111852	Leslie Lipka, MD	Study Director
NCT00111891	Medical Monitor	Study Director
NCT00111904	John S. MacDonald, MD	Study Chair
NCT00112021	Lisa Porter, MD	Study Director
NCT00112112	Raburn Mallory, MD	Study Director
NCT00112151	Robert S. Schwartz, MD	Principal Investigator
NCT00112346	Call 1-877-CTLILLY (1-877-285-4559) or 1-317-615-4559 Mon - Fri 9 AM - 5 PM Eastern time (UTC/GMT - 5 hours, EST)	Study Director
NCT00112359	Bruce Montgomery, MD	Study Director
NCT00112372	Frank Haluska, M.D.	Study Director
NCT00112385	Anthony A Amato, MD	Principal Investigator
NCT00112437	Medical Monitor	Study Director
NCT00112476	Gary Hudes	Principal Investigator
NCT00112489	Matthew A. Powell, MD	Study Chair
NCT00112502	Marta Penas-Prado, MD	Study Chair
NCT00112528	George P. Kim, MD	Study Chair
NCT00112580	Steven A. Rosenberg, MD, PhD	Principal Investigator
NCT00112645	Kenneth G. Lucas, MD	Principal Investigator
NCT00112671	Srikala Sridhar	Principal Investigator
NCT00112736	Patrick Wen, MD	Principal Investigator
NCT00112840	Jaime Merchan	Principal Investigator
NCT00112853	Judith Karp	Principal Investigator
NCT00112866	Mark Gilbert	Principal Investigator
NCT00112996	Ying Guo, MD, MS	Principal Investigator
NCT00113204	Sundar Jagannath, MD	Principal Investigator
NCT00113204	David S. Siegel, MD; Ph.D	Principal Investigator
NCT00113204	Ivan Borrello, MD	Principal Investigator
NCT00113204	Paul Richardson, MD	Principal Investigator
NCT00113217	Eric Jonasch, MD	Principal Investigator
NCT00113230	Christopher H. Crane, MD	Principal Investigator
NCT00113269	Central Contact	Study Director
NCT00113308	GSK Clinical Trials	Study Director
NCT00113334	Edward S. Kim, MD	Principal Investigator
NCT00113347	Bonnie S. Glisson, MD	Principal Investigator
NCT00113360	James Yao, M.D.	Principal Investigator
NCT00113373	Agustin Garcia	Principal Investigator
NCT00113490	M Pamela Griffin, M.D.	Study Director
NCT00113516	Pfizer CT.gov Call Center	Study Director
NCT00113568	Clinical Development Support	Study Director
NCT00113594	Call 1-877-CTLILLY (1-877-285-4559) or 1-317-615-4559 Mon - Fri 9 AM - 5 PM Eastern Time (UTC/GMT - 5 hours, EST)	Study Director
NCT00113607	Johnson &amp; Johnson Pharmaceutical Research &amp; Development, L.L. C. Clinical Trial	Study Director
NCT00113724	Michael Kurman, MD	Study Director
NCT00113750	Karl Jürgen Fischer von Weikersthal-Drachenberg, MD	Study Chair
NCT00113815	Johnson &amp; Johnson Pharmaceutical Research &amp; Development, L.L. C. Clinical Trial	Study Director
NCT00113893	Scios, Inc. Clinical Trial	Study Director
NCT00113984	James L Gulley, M.D.	Principal Investigator
NCT00114166	Thomas J. Herzog, MD	Study Chair
NCT00114179	Christopher Crane	Principal Investigator
NCT00114218	Brigitte Miller	Principal Investigator
NCT00114257	Jean-Pierre Issa, MD	Study Chair
NCT00114283	Christopher Thomas	Principal Investigator
NCT00114452	Joshua Hare, MD	Principal Investigator
NCT00114530	Keith Sullivan, MD	Study Chair
NCT00114530	Daniel Furst, MD	Study Chair
NCT00114530	Peter McSweeney, MD	Study Chair
NCT00114530	Leslie Crofford, MD	Principal Investigator
NCT00114530	Maureen Mayes, MD, MPH	Principal Investigator
NCT00114530	Richard Nash, MD	Principal Investigator
NCT00114569	James Chamberlain, MD	Principal Investigator
NCT00114686	AstraZeneca Seroquel Medical Science Director, MD	Study Director
NCT00114699	GSK Clinical Trials	Study Director
NCT00114777	Bristol-Myers Squibb	Study Director
NCT00115050	Tibotec Pharmaceuticals Clinical Trial	Study Director
NCT00115089	Elliott Grossbard, M.D.	Study Director
NCT00115089	Eli Meltzer, M.D.	Principal Investigator
NCT00115089	Harold Nelson, M.D.	Principal Investigator
NCT00115310	Jeffrey Tobias, MD	Study Director
NCT00115570	Dr Arethi PHILOTHEOU	Principal Investigator
NCT00115765	MD	Study Director
NCT00115804	Lesley M Arnold, M.D.	Principal Investigator
NCT00115817	Andrew Selwyn, MD	Principal Investigator
NCT00115973	William Lyness, PhD	Study Director
NCT00115999	Steven R Deitcher, MD	Study Director
NCT00116103	Astellas Medical Monitor, MD	Study Director
NCT00116129	Robert Bennett, MD	Principal Investigator
NCT00116168	Barbara White, M.D.	Study Director
NCT00116402	Imre Noth, M.D.	Principal Investigator
NCT00116506	Jeffrey Meyerhardt, MD	Principal Investigator
NCT00116519	Call 1-877-CTLILLY (1-877-285-4559) or 1-317-615-4559 Monday - Friday 9am-5pm Eastern time (UTC/GMT - 5 hours, EST)	Study Director
NCT00116610	Hazel Breitz, MD	Study Director
NCT00116610	Paul Weiden, MD	Study Director
NCT00116610	David Karlin, MD	Study Director
NCT00116649	Sharon Levy, MD	Study Director
NCT00116740	William R Shanahan, Jr., MD	Study Chair
NCT00116753	Clinical Development Support	Study Director
NCT00116805	Anuj Gaggar, MD	Study Director
NCT00116818	GSK Clinical Trials	Study Director
NCT00116831	GSK Clinical Trials	Study Director
NCT00116844	GSK Clinical Trials	Study Director
NCT00116857	Robert M. Carney, PhD	Study Chair
NCT00116883	GSK Clinical Trials	Study Director
NCT00116961	Andrzej J Jakubowiak, MD, PhD	Principal Investigator
NCT00117273	Duramed Protocol Chair	Study Chair
NCT00117286	Clinical Development Support	Study Director
NCT00117325	GSK Clinical Trials	Study Director
NCT00117338	Medical Monitor	Study Director
NCT00117403	Douglas Galasko, MD	Principal Investigator
NCT00117429	Marcus Altfeld, MD/PhD	Principal Investigator
NCT00117429	Mathias Lichterfeld, MD/PhD	Principal Investigator
NCT00117468	Duramed Protocol Chair	Study Chair
NCT00117481	Duramed Protocol Chair	Study Chair
NCT00117507	Novartis Pharmaceuticals	Study Director
NCT00117598	Pfizer CT.gov Call Center	Study Director
NCT00117611	Robert M Naclerio, MD	Principal Investigator
NCT00117637	Bayer Study Director	Study Director
NCT00117650	Medical Monitor	Study Director
NCT00117676	Anuj Gaggar, MD	Study Director
NCT00117689	Medical Monitor	Study Director
NCT00117845	Thomas A Waldmann, M.D.	Principal Investigator
NCT00117962	Ramaswamy Govindan, MD	Study Chair
NCT00117975	Myron S. Czuczman, MD	Study Chair
NCT00117988	Anas Younes	Principal Investigator
NCT00118040	Howard Bailey	Principal Investigator
NCT00118092	Elisabeth Heath	Principal Investigator
NCT00118144	David Gandara	Principal Investigator
NCT00118157	Elaina Gartner	Principal Investigator
NCT00118183	Rogerio Lilenbaum	Principal Investigator
NCT00118196	Robert K. Stuart, MD	Study Chair
NCT00118222	Robert J. Maciunas, MD	Study Chair
NCT00118261	Smitha Krishnamurthi, MD	Principal Investigator
NCT00118287	Bart Scott	Principal Investigator
NCT00118482	Robert S. Sheldon, MD PhD	Principal Investigator
NCT00118495	David M Ferguson, PhD, MD, FACCP	Study Director
NCT00118495	Julia R Heiman, PhD	Principal Investigator
NCT00118625	Deepen Patel, MD	Principal Investigator
NCT00118703	GSK Clinical Trials	Study Director
NCT00118729	GSK Clinical Trials	Study Director
NCT00118742	Clinical Trials	Study Director
NCT00118755	Clinical Trials	Study Director
NCT00118898	Eric Daar, MD	Study Chair
NCT00118898	Paul Sax, MD	Study Chair
NCT00118924	Anna Durbin, MD	Principal Investigator
NCT00118924	Peter Wright, MD	Principal Investigator
NCT00118989	Carmen E Guerra, M.D.	Principal Investigator
NCT00119080	Eric Stern, MD	Principal Investigator
NCT00119236	Archie Tse	Principal Investigator
NCT00119249	Anna Pavlick	Principal Investigator
NCT00119262	Kathy Miller	Principal Investigator
NCT00119301	Paul A. Meyers, MD	Study Chair
NCT00119340	Brenda Sandmaier, MD	Principal Investigator
NCT00119379	Grace A. McComsey, MD	Principal Investigator
NCT00119639	Bayer Study Director	Study Director
NCT00119652	AstraZeneca Seroquel Medical Science Director, MD	Study Director
NCT00119665	Deborah Grady, MD, MPH	Principal Investigator
NCT00119678	Bristol-Myers Squibb	Study Director
NCT00119730	Jennifer R Brown, MD, PhD	Principal Investigator
NCT00119756	Johnson &amp; Johnson Pharmaceutical Research &amp; Development, L.L. C. Clinical Trial	Study Director
NCT00120081	Gary Simon, M.D., Ph.D	Principal Investigator
NCT00120120	Victor Sloan, MD	Study Director
NCT00120250	Mark Pollack, M.D.	Principal Investigator
NCT00120471	Mark Mirochnick, MD	Study Chair
NCT00120471	Taha Taha, MD, PhD	Study Chair
NCT00120471	Regis Kreitchmann, MD	Study Chair
NCT00120536	Novartis Pharmaceuticals	Study Director
NCT00120874	Barry Reisberg, M.D.	Principal Investigator
NCT00120874	Sunnie Kenowsky, D.V.M.	Study Director
NCT00120900	GSK Clinical Trials	Study Director
NCT00120926	Reese Clark, MD	Principal Investigator
NCT00121199	Alison Stopeck	Principal Investigator
NCT00121225	Naomi Balzer-Haas	Principal Investigator
NCT00121238	Maha Hussain	Principal Investigator
NCT00121264	Ulka Vaishampayan	Principal Investigator
NCT00121277	Eric X. Chen, MD, PhD	Principal Investigator
NCT00121290	Igor Puzanov	Principal Investigator
NCT00121381	Novartis Pharmaceuticals	Study Chair
NCT00121602	MD	Study Director
NCT00121628	MD	Study Director
NCT00121680	Eisai Inc.	Study Director
NCT00121732	Jenny Zhang, M.D.	Study Director
NCT00121836	Clinical Trials	Study Director
NCT00121849	Iván D Vélez Bernal, MD, PhD	Principal Investigator
NCT00121862	Franco M Piazza, MD, MPH	Study Director
NCT00122070	David J Rissmiller, DO	Principal Investigator
NCT00122278	Benjamin W. Friedman, MD, MS	Principal Investigator
NCT00122343	Frank Haluska, M.D., Ph.D.	Study Chair
NCT00122382	Bristol-Myers Squibb	Study Director
NCT00122837	Call 1-877-CTLILLY (1-877-285-4559) or 1-317-615-4559 Mon-Fri 9am-5pm Eastern time (UTC/GMT - 5 hours, EST)	Study Director
NCT00122863	Call 1-877-CTLILLY (1-877-285-4559) or 1-317-615-4559 Mon-Fri 9 AM - 5 PM Eastern time (UTC/GMT- 5 hours, EST)	Study Director
NCT00122876	Sy-Shi Wang, PhD	Study Director
NCT00122954	Lynne Shinto, ND, MPH	Principal Investigator
NCT00123110	Anne R. Cappola, MD, ScM	Principal Investigator
NCT00123162	Richard Legro, M.D.	Principal Investigator
NCT00123201	Global Clinical Director Solvay	Study Director
NCT00123253	Steven Grinspoon, MD	Principal Investigator
NCT00123461	Medical Monitor	Study Director
NCT00123474	Bristol-Myers Squibb	Study Director
NCT00123487	Bristol-Myers Squibb	Study Director
NCT00123630	John C. Fang, M.D.	Principal Investigator
NCT00123734	Jim Douketis, MD FRCPC	Principal Investigator
NCT00123734	Jeff Ginsberg, MD FRCPC	Principal Investigator
NCT00123903	GSK Clinical Trials, MD	Study Director
NCT00123955	Dalane W. Kitzman, MD	Principal Investigator
NCT00123968	Merlin Robb, MD	Study Chair
NCT00124007	Job Bwayo, MD, PhD	Principal Investigator
NCT00124007	Etienne Karita, MD	Principal Investigator
NCT00124020	G. Ralph Corey, MD	Principal Investigator
NCT00124124	Sylvia Adams, MD	Study Director
NCT00124124	Nina Bhardwaj, MD, PhD	Principal Investigator
NCT00124189	Stephen Kelsey, MD	Study Director
NCT00124280	Novartis Pharmaceuticals	Study Director
NCT00124306	Leroy M. Nyberg, Jr., Ph.D, M.D.	Study Director
NCT00124332	ICD CSD	Study Director
NCT00124384	Michael Perlis, PhD	Principal Investigator
NCT00124449	Bristol-Myers Squibb	Study Director
NCT00124605	Przemyslaw Twardowski	Principal Investigator
NCT00124618	Aminah Jatoi, MD	Study Chair
NCT00124657	Alberto Broniscer, MD	Principal Investigator
NCT00124865	David Tribble, MD, DrPH	Principal Investigator
NCT00124943	Jose' Iglesias, MD	Study Director
NCT00124982	Bristol-Myers Squibb	Study Director
NCT00125125	Novartis Pharmaceuticals	Study Chair
NCT00125138	Email contact via H. Lundbeck A/S	Study Director
NCT00125190	Ipsen Study Director, M.D.	Study Director
NCT00125255	Susan T. Verghese, MD	Principal Investigator
NCT00125255	Navil Sethna, MD	Principal Investigator
NCT00125255	Andrew Wiznia, MD	Principal Investigator
NCT00125333	Andria Langenberg, MD	Study Director
NCT00125359	Konstantin H Dragnev, MD	Principal Investigator
NCT00125385	Medical Monitor	Study Director
NCT00125398	James Jones, MD, PharmD	Study Director
NCT00125424	James Jones, PharmD, MD	Study Director
NCT00125515	Adam Bisaga, M.D.	Principal Investigator
NCT00125528	Thomas J Schnitzer, M.D., Ph.D.	Principal Investigator
NCT00125528	Vania Apkarian, Ph.D.	Principal Investigator
NCT00125749	Anna Karolina Palucka, MD, PhD	Study Director
NCT00125879	Medical Monitor	Study Director
NCT00125892	Call 1-877-CTLILLY (1-877-285-4559) or 1-317-615-4559 Mon-Fri 9 AM to 5 PM Eastern Time (UTC/GMT - 5 hours, EST)	Study Director
NCT00125918	Call 1-877-CTLILLY (1-877-285-4559) or 1-317-615-4559 Mon - Fri 9 AM - 5 PM Eastern time (UTC/GMT - 5 hours, EST)	Study Director
NCT00125931	Beth L Murphy, MD, PhD	Principal Investigator
NCT00125944	Robert Walker, MD	Principal Investigator
NCT00125957	Beth L Murphy, MD, PhD	Principal Investigator
NCT00125970	Michael Keefer, MD	Study Chair
NCT00125970	Gavin Churchyard, MBBCh, FCP, MMed, PhD	Study Chair
NCT00126373	Eric L Altschuler, M.D., Ph.D.	Principal Investigator
NCT00126425	John Lombard	Study Director
NCT00126438	John Strohmeyer	Study Director
NCT00126490	Mayer Fishman	Principal Investigator
NCT00126503	Jeffrey Sosman	Principal Investigator
NCT00126542	Gini Fleming	Principal Investigator
NCT00126555	Randal Weber	Principal Investigator
NCT00126594	Eric Jonasch	Principal Investigator
NCT00126620	Lillian L. Siu, MD, FRCPC	Study Chair
NCT00126646	Robert Kreitman, MD	Principal Investigator
NCT00126880	Susan W Cox, Ph D	Study Director
NCT00127270	Novartis Pharmaceuticals Corp.	Study Director
NCT00127283	Global Clinical Registry (GCR, 1452)	Study Director
NCT00127530	Andrew Blight, PhD	Study Director
NCT00127634	Call 1-877-CTLILLY (1-877-285-4559) or 1-317-615-4559 Mon-Fri 9 AM - 5 PM Eastern time (UTC/GMT - 5 hours, EST)	Study Director
NCT00127686	Ian M Paul, MD, MSc	Principal Investigator
NCT00127803	Thomas Marbury, MD	Principal Investigator
NCT00127803	Richard Greenberg, MD	Principal Investigator
NCT00127933	Clinical Trials	Study Director
NCT00128128	Kalpana Gupta, MD, MPH	Principal Investigator
NCT00128271	Eliot W Godofsky, MD, FACP	Principal Investigator
NCT00128401	Jennifer A Cameron, C.R.N.P.	Principal Investigator
NCT00128492	Bruce Montgomery, MD	Study Director
NCT00128505	Katherine Beebe, PhD	Study Director
NCT00128622	Michael A. Morse, MD	Study Chair
NCT00128700	Alba A. Brandes, MD	Study Chair
NCT00128830	Tibotec Pharmaceuticals, Ireland Clinical Trial	Study Director
NCT00128934	Medical Monitor, MD	Study Director
NCT00129259	Kevan Herold, MD	Principal Investigator
NCT00129337	Nuhad Ibrahim, MD	Principal Investigator
NCT00129337	Linda Garland, MD	Principal Investigator
NCT00129337	Lee Rosen, MD	Principal Investigator
NCT00129337	Lucas Wong, MD	Principal Investigator
NCT00129337	Lee S Schwartzberg, MD, FACP	Principal Investigator
NCT00129337	David E Gerber, MD	Principal Investigator
NCT00129441	David A Lewis, MD	Principal Investigator
NCT00129545	David Holmes, MD	Principal Investigator
NCT00129623	Clinical Trials	Study Director
NCT00129727	Richard T Penson, MRCP MD	Principal Investigator
NCT00129844	Robert Natale, M.D.	Study Chair
NCT00130169	Naseem Zojwalla, M.D.	Study Director
NCT00130182	Amy Schaberg, BSN	Study Director
NCT00130208	Edmund J Lewis, M.D.	Study Director
NCT00130208	Robert C Atkins, M.D.	Principal Investigator
NCT00130208	Dick deZeeuw, M.D.	Principal Investigator
NCT00130208	Itamar Raz, M.D.	Principal Investigator
NCT00130221	Robert A Weinstein, MD	Principal Investigator
NCT00130286	Marshall J Glesby, MD, PhD	Principal Investigator
NCT00130442	Michael Millward, MD	Study Chair
NCT00130442	Anne Hamilton, PhD	Principal Investigator
NCT00130442	Damien Thomson, MD	Principal Investigator
NCT00130520	David S Alberts, MD	Principal Investigator
NCT00130689	Jennifer A. Chan, MD	Principal Investigator
NCT00130702	Daniel J DeAngelo, MD, PhD	Principal Investigator
NCT00130728	Paula O'Connor, M.D.	Study Director
NCT00130780	Naiyer Rizvi, M.D.	Principal Investigator
NCT00130793	Medical Monitor	Study Director
NCT00130923	Alan I. Green, MD	Principal Investigator
NCT00131261	enquiries@topotarget.com	Study Chair
NCT00131430	Medical Monitor	Study Director
NCT00131469	Eric S Orwoll, M.D.	Principal Investigator
NCT00131469	Jay Shapiro, M.D.	Principal Investigator
NCT00131469	Brendan Lee, M.D., PhD	Principal Investigator
NCT00131469	Sandra Veith, CRA	Principal Investigator
NCT00131638	MD	Study Director
NCT00131677	Kata L Chillag, PhD	Principal Investigator
NCT00131677	Lisa A Grohskopf, MD, MPH	Principal Investigator
NCT00131677	Susan Buchbinder, MD	Principal Investigator
NCT00131677	Melanie Thompson, MD	Principal Investigator
NCT00131677	Kenneth H. Mayer, MD	Principal Investigator
NCT00131885	Patricia A. Murphy, DrPH	Principal Investigator
NCT00131911	Timothy Hobday	Principal Investigator
NCT00131937	Sandra Horning	Principal Investigator
NCT00131989	B. Smith	Principal Investigator
NCT00132015	Antonio T. Fojo, MD, PhD	Principal Investigator
NCT00132028	Mark Kirschbaum	Principal Investigator
NCT00132067	Susan Modesitt	Principal Investigator
NCT00132119	Philip Jochelson, MD	Study Director
NCT00132158	Lisa M McGregor, MD, PhD	Principal Investigator
NCT00132314	Robert A. Rosenheck, AB MD	Study Chair
NCT00132379	Suzanne Kilany	Study Director
NCT00132444	Kimberly Workowski, MD	Principal Investigator
NCT00132496	Yufang Lu	Study Director
NCT00132522	Joseph O'Connor, MD	Principal Investigator
NCT00132600	Joseph Fowler, Prof.	Principal Investigator
NCT00132678	Johnson &amp; Johnson Pharmaceutical Research &amp; Development, L.L. C. Clinical Trial	Study Director
NCT00132691	Douglas Jabs, MD, MBA	Study Chair
NCT00132691	John Kempen, MD, PhD	Study Chair
NCT00132691	Janet T Holbrook, PhD, MPH	Study Director
NCT00132691	Michael Altaweel, MD	Study Director
NCT00133367	Karen K Ballen, MD	Principal Investigator
NCT00133380	Call 1-877-CTLILLY (1-877-285-4559) or 1-317-615-4559 Mon - Fri 9 AM - 5 PM Eastern time (UTC/GMT - 5 hours, EST)	Study Director
NCT00133952	Karl Beutner	Study Director
NCT00133991	Yvette L. Kasamon, MD	Study Chair
NCT00134043	Manisha Shah	Principal Investigator
NCT00134069	Wells Messersmith	Principal Investigator
NCT00134134	Bruce Strober, MD, PhD	Principal Investigator
NCT00134147	Pfizer CT.gov Call Center	Study Director
NCT00134199	Pfizer CT.gov Call Center	Study Director
NCT00134355	Kathleen W. Beekman, MD	Principal Investigator
NCT00134394	Melissa Magliocco, MD	Principal Investigator
NCT00134459	Medical Monitor, MD	Study Director
NCT00134485	Pfizer CT.gov Call Center	Study Director
NCT00134498	Pfizer CT.gov Call Center	Study Director
NCT00134511	Pfizer CT.gov Call Center	Study Director
NCT00134719	GSK Clinical Trials	Study Director
NCT00135005	Novartis Pharmaceuticals	Study Director
NCT00135135	Wayne L Furman, MD	Principal Investigator
NCT00135304	MD	Study Director
NCT00135330	James Malone, MD	Study Director
NCT00135356	Bristol-Myers Squibb	Study Director
NCT00135421	Bristol-Myers Squibb	Study Director
NCT00135668	Gregory Hammer, MD	Principal Investigator
NCT00135668	Scott Schulman, MD	Principal Investigator
NCT00135694	Abraham Shaked, MD, PhD	Study Chair
NCT00135759	Paolo Mannelli, M.D.	Principal Investigator
NCT00135785	Steve Shoptaw, Ph.D.	Principal Investigator
NCT00135798	Gregory T. Everson, MD	Study Chair
NCT00135798	James Everhart, MD	Study Director
NCT00135902	Uma Reddy, MD	Principal Investigator
NCT00135902	Elizabeth A Thom, PhD	Principal Investigator
NCT00135902	Margaret Harper, MD	Principal Investigator
NCT00135941	Lisa Jean-Louis	Study Director
NCT00135993	UCB Clinical Trial Call Center	Study Director
NCT00136045	UCB Clinical Trial Call Center	Study Director
NCT00136266	Paul L. Geltman, MD, MPH	Principal Investigator
NCT00136383	Wei Zhang, M.D., Ph.D.	Principal Investigator
NCT00136643	Michel G. Bergeron, MD, FRCPC	Principal Investigator
NCT00136786	Adam Bisaga, M.D.	Principal Investigator
NCT00136903	Philip McCarthy, MD	Principal Investigator
NCT00136968	Pfizer CT.gov Call Center	Study Director
NCT00137072	Pfizer CT.gov Call Center	Study Director
NCT00137371	Medical Monitor	Principal Investigator
NCT00137423	Pfizer CT.gov Call Center	Study Director
NCT00137436	Pfizer CT.gov Call Center	Study Director
NCT00137449	Pfizer CT.gov Call Center	Study Director
NCT00137969	Paul Brunetta, M.D.	Study Director
NCT00138177	Marwan Fakih	Principal Investigator
NCT00138203	Anne Traynor	Principal Investigator
NCT00138216	Lars M. Wagner, MD	Study Chair
NCT00138216	John P. Perentesis, MD	Study Chair
NCT00138567	Novartis Pharmaceuticals	Study Director
NCT00138606	Novartis Pharmaceuticals	Study Director
NCT00138632	Novartis Customer Information	Study Chair
NCT00139061	Pfizer CT.gov Call Center	Study Director
NCT00139152	Robert G Townley, MD	Principal Investigator
NCT00139152	Muhammad A Pasha, M.D.	Principal Investigator
NCT00139776	Pfizer CT.gov Call Center	Study Director
NCT00139789	UCB Clinical Trial Call Center	Study Director
NCT00139880	UCB Clinical Trial Call Center	Study Director
NCT00139906	Global Clinical Director Solvay	Study Director
NCT00139919	Global Clinical Director Solvay	Study Director
NCT00140218	Lawrence H Phillips, M.D.	Principal Investigator
NCT00140452	Elijah Stommel	Principal Investigator
NCT00140478	Mary-Ellen Taplin, MD	Principal Investigator
NCT00140556	David M Brizel, MD	Principal Investigator
NCT00140712	GSK Clinical Trials	Study Director
NCT00141024	Xia Jin, MD, PhD	Study Chair
NCT00141024	Jorge Sanchez, MD	Study Chair
NCT00141050	Matthew Brams, MD	Principal Investigator
NCT00141063	Ann Childress, MD	Principal Investigator
NCT00141167	Pfizer CT.gov Call Center	Study Director
NCT00141271	Pfizer CT.gov Call Center	Study Director
NCT00141284	Pfizer CT.gov Call Center	Study Director
NCT00141349	Pfizer CT.gov Call Center	Study Director
NCT00141479	Global Clinical Director Solvay	Study Director
NCT00141505	Global Clinical Director Solvay	Study Director
NCT00141661	Pfizer CT.gov Call Center	Study Director
NCT00141778	Nancy J. Brown, M.D.	Principal Investigator
NCT00141791	Medical Monitor	Study Director
NCT00141817	Medical Monitor	Study Director
NCT00141830	Medical Monitor	Study Director
NCT00141830	Trial Manager	Principal Investigator
NCT00142103	Pfizer CT.gov Call Center	Study Director
NCT00142428	Andrew X. Zhu, MD	Principal Investigator
NCT00142454	Nina Bhardwaj, MD, PhD	Principal Investigator
NCT00142454	Sylvia Adams, MD	Study Director
NCT00142506	Michael J Zelefsky, M.D.	Principal Investigator
NCT00142584	Betty S Riggs, MD, MBA	Study Director
NCT00142753	Stephen Obaro, MBBS, PhD	Study Chair
NCT00142818	Kyle M. Kampman, M.D.	Principal Investigator
NCT00142870	David M Penetar	Principal Investigator
NCT00142896	Eric C. Strain, MD	Principal Investigator
NCT00142909	Rajita Sinha	Principal Investigator
NCT00142948	Thomas R. Kosten, MD	Principal Investigator
NCT00142961	Frances R Levin, M.D.	Principal Investigator
NCT00143065	John C. Byrd, M.D.	Principal Investigator
NCT00143156	Pfizer CT.gov Call Center	Study Director
NCT00143260	Pfizer CT.gov Call Center	Study Director
NCT00143325	Pfizer CT.gov Call Center	Study Director
NCT00143481	Pfizer CT.gov Call Center	Study Director
NCT00143559	Gregory Hale, M.D.	Principal Investigator
NCT00143611	VP Clinical Science	Study Director
NCT00143663	Medical Director	Study Director
NCT00143676	Medical Director	Study Director
NCT00143741	Pradeep Kadambi, MD	Principal Investigator
NCT00143819	Melissa Magliocco, MD	Principal Investigator
NCT00144014	Michael Hill	Principal Investigator
NCT00144300	Boehringer Ingelheim	Study Chair
NCT00144313	Laura L Hammitt, MD	Principal Investigator
NCT00144365	Heiner Grosskurth, MD, PhD	Principal Investigator
NCT00144365	Rebecca Bunnell, ScD, MEd	Principal Investigator
NCT00144365	Shabbar Jaffar, PhD	Principal Investigator
NCT00144365	Alex Coutinho, MBChB, MSc	Principal Investigator
NCT00144417	Richard E Chaisson, MD	Study Chair
NCT00144417	Susan E Dorman, MD	Principal Investigator
NCT00144417	John L Johnson, MD	Principal Investigator
NCT00144690	Santiago Arroyo, M.D., Ph.D.	Study Director
NCT00145041	Agop Bedikian, MD	Principal Investigator
NCT00145210	Betty S. Riggs, MD, MBA	Study Director
NCT00145327	Novartis Pharmaceuticals	Study Chair
NCT00146003	Melissa Magliocco, MD	Principal Investigator
NCT00146185	Eliot Krane, MD	Principal Investigator
NCT00146211	Ira Shoulson, MD	Principal Investigator
NCT00146211	Christopher Ross, MD, PhD	Principal Investigator
NCT00146211	Blair Leavitt, MD	Principal Investigator
NCT00146224	MD	Study Director
NCT00146289	Boehringer Ingelheim Study Coordinator	Study Chair
NCT00146523	Katherine Beebe, PhD	Study Director
NCT00147225	Saroj Vadhan-Raj, MD	Principal Investigator
NCT00147329	Alan Mentor, MD	Principal Investigator
NCT00147329	Gerald Krueger	Principal Investigator
NCT00147498	Pfizer CT.gov Call Center	Study Director
NCT00147537	Pfizer CT.gov Call Center	Study Director
NCT00147628	Pfizer CT.gov Call Center	Study Director
NCT00147966	Arthur Kavanaugh, MD	Principal Investigator
NCT00148109	Rashmi Chugh, M.D.	Principal Investigator
NCT00148317	Ruben Niesvizky, MD	Principal Investigator
NCT00148382	Lawrence Galitz	Principal Investigator
NCT00148759	Igho Ofotokun, MD, MSc	Principal Investigator
NCT00148772	Daniel Shevrin, MD	Principal Investigator
NCT00148785	Igho Ofotokun, MD, MSc	Principal Investigator
NCT00148915	HoffmannLaRoche Clinical Trials, MD	Study Director
NCT00148941	GSK Clinical Trials	Study Director
NCT00149630	Thomas R. Kosten, MD	Principal Investigator
NCT00149799	Sabine Wilhelm, PhD	Principal Investigator
NCT00149799	Katharine Phillips, MD	Principal Investigator
NCT00149838	Mark S. George, MD	Principal Investigator
NCT00150215	Pfizer CT.gov Call Center	Study Director
NCT00150397	Pfizer CT.gov Call Center	Study Director
NCT00150462	Mai Le, MD	Study Director
NCT00151333	Medical Monitor	Study Director
NCT00151398	Medical Monitor	Study Director
NCT00151489	Pfizer CT.gov Call Center	Study Director
NCT00151528	Pfizer CT.gov Call Center	Study Director
NCT00151541	Steven Garrett, MS, DDS, FACS	Study Director
NCT00151879	UCB Clinical Trial Call Center	Study Director
NCT00151892	William J Sandborn, MD	Principal Investigator
NCT00151892	Professor Geert D'Haens	Principal Investigator
NCT00152113	Wing Leung, M.D.	Principal Investigator
NCT00152386	UCB Clinical Trial Call Center	Study Director
NCT00152451	Barbara Bennett, PhD	Study Director
NCT00152503	Barbara Bennett, PhD	Study Director
NCT00152542	Michael D Schreiber, M.D.	Principal Investigator
NCT00153179	Mark Creager, M.D.	Principal Investigator
NCT00153790	Conrad Earnest, PhD	Principal Investigator
NCT00153803	James R Rigas, MD	Study Chair
NCT00154063	Julia Young, M.D., Ph.D.	Study Director
NCT00156013	Chadi Nabhan, MD	Principal Investigator
NCT00156247	Melissa A. Magliocco, MD	Principal Investigator
NCT00156403	David C Whitcomb, MD, PhD	Study Director
NCT00156520	Peter L Bailey, MD`	Principal Investigator
NCT00156533	Michael L Perlis, Ph.D.	Principal Investigator
NCT00156689	Gary W. Duncan, M.D.	Principal Investigator
NCT00156910	Medical Director	Study Chair
NCT00156949	MD	Study Director
NCT00157326	Call 1-877-CTLILLY (1-877-285-4559) or 1-317-615-4559 Mon - Fri 9 AM - 5 PM Eastern time (UTC/GMT - 5 hours, EST)	Study Director
NCT00157339	Call 1-877-CTLILLY (1-877-285-4559) or 1-317-615-4559 Mon-Fri 9 AM to 5 PM Eastern Time (UTC/GMT - 5 hour, EST)	Study Director
NCT00157703	Axel Mescheder, M.D.	Study Director
NCT00158158	Dorothy Hatsukami, Ph.D.	Principal Investigator
NCT00158210	Steve Shoptaw, PhD	Principal Investigator
NCT00158249	Scott E. Lukas, PhD	Principal Investigator
NCT00158600	Medical Monitor	Study Director
NCT00159432	Syma Iqbal, M.D.	Principal Investigator
NCT00159653	Pfizer CT.gov Call Center	Study Director
NCT00159705	Pfizer CT.gov Call Center	Study Director
NCT00159731	Pfizer CT.gov Call Center	Study Director
NCT00160121	Julio Casoy, MD	Study Director
NCT00160303	Joanne P Borg-Stein, MD	Principal Investigator
NCT00160303	Alexios G Carayannopoulos, DO, MPH	Study Director
NCT00160342	Global Clinical Director Solvay	Study Director
NCT00160355	Kimberly Kasow, DO	Principal Investigator
NCT00160602	UCB Clinical Trial Call Center	Study Director
NCT00160641	UCB Clinical Trial Call Center	Study Director
NCT00161213	Elizabeth A. Poplin, MD	Principal Investigator
NCT00161291	Andres Forero-Torres, MD	Principal Investigator
NCT00161421	William J Bremner, MD, PhD	Principal Investigator
NCT00161681	Medical Monitor, MD	Study Director
NCT00162032	Qi Zhu, MD,	Study Director
NCT00162045	Qi Zhu, MD	Study Director
NCT00162123	Bristol-Myers Squibb	Study Director
NCT00162136	Bristol-Myers Squibb	Study Director
NCT00162149	Bristol-Myers Squibb	Study Director
NCT00162292	Bristol-Myers Squibb	Study Director
NCT00162305	Bristol Myers Squibb	Study Director
NCT00162318	Call 1-877-CTLILLY (1-877-285-4559) or 1-317-615-4559 Mon - Fri 9 AM - 5 PM Eastern time (UTC/GMT - 5 hours, EST)	Study Director
NCT00162331	Qi Zhu, MD	Study Director
NCT00162734	Ralph T. Doyle	Study Director
NCT00162981	Email contact via H. Lundbeck A/S	Study Director
NCT00163046	Pfizer CT.gov Call Center	Study Director
NCT00163085	Pfizer CT.gov Call Center	Study Director
NCT00163488	Mark A. Wingertzahn, Ph.D.	Study Chair
NCT00164359	Rachel N Bronzan, MD, MPH	Principal Investigator
NCT00164424	Gabriela Paz Bailey, MD	Principal Investigator
NCT00164424	David Lewis, MD	Principal Investigator
NCT00164710	Rachel N Bronzan, MD, MPH	Principal Investigator
NCT00165295	Steven P. Treon, MD, MA, PhD	Principal Investigator
NCT00165334	Pasi A Janne, MD, PhD	Principal Investigator
NCT00165477	Patrick Y. Wen, MD	Principal Investigator
NCT00165568	David Ryan, MD	Principal Investigator
NCT00165789	Santiago Arroyo, M.D., Ph.D	Study Director
NCT00165802	Jenny Zhang	Study Director
NCT00166413	Angela Dispenzieri, M.D.	Principal Investigator
NCT00166439	Patrick B. Johnston, M.D., Ph.D.	Principal Investigator
NCT00166452	Keith A Bengtson, M.D.	Principal Investigator
NCT00166556	Russell H. Wiesner, M.D.	Principal Investigator
NCT00167310	Jeffrey K Yao, Ph.D., FACB	Principal Investigator
NCT00167544	Nehal A. Parikh, D.O., M.S.	Principal Investigator
NCT00167648	R. Bruce Montgomery, MD	Principal Investigator
NCT00167687	Tracy Simpson, PhD	Principal Investigator
NCT00167687	Andrew Saxon, MD	Principal Investigator
NCT00167687	Charles Meredith, MD	Principal Investigator
NCT00168051	Medical Monitor	Study Director
NCT00168051	Trial Manager	Principal Investigator
NCT00168051	Trial Manager	Principal Investigator
NCT00168051	Trial Manager	Principal Investigator
NCT00168051	Trial Manager	Principal Investigator
NCT00168051	Trial Manager	Principal Investigator
NCT00168051	Trial Manager	Principal Investigator
NCT00168064	Stuart Lessin, M.D.	Study Director
NCT00168103	Program Director, Clinical R&amp;D	Study Director
NCT00168337	Medical Director	Study Director
NCT00168389	Medical Director	Study Director
NCT00168415	Medical Director	Study Director
NCT00168428	Medical Director	Study Director
NCT00168454	Medical Director	Study Director
NCT00168779	Boehringer Ingelheim	Study Chair
NCT00170053	Thomas A. Gonwa, M.D.	Principal Investigator
NCT00170157	Eugene D. Kwon, M.D.	Principal Investigator
NCT00170456	Timothy Mant, MD	Principal Investigator
NCT00170469	Lawrence Currie, MD	Principal Investigator
NCT00170768	Novartis	Study Chair
NCT00171184	Novartis	Study Chair
NCT00171405	Novartis Pharmaceuticals	Study Director
NCT00171457	Novartis	Study Director
NCT00171470	Novartis	Study Director
NCT00171613	Novartis	Study Chair
NCT00172185	Clinical Development	Study Director
NCT00174434	Pfizer CT.gov Call Center	Study Director
NCT00174499	Elisabeth A Kruse, PhD	Study Director
NCT00174538	Stacy S. Shord, PharmD	Principal Investigator
NCT00174720	ICD CSD	Study Director
NCT00174733	ICD CSD	Study Director
NCT00174746	ICD CSD	Study Director
NCT00174785	International Clinical Development	Study Director
NCT00174798	Clinical Sciences &amp; Operations	Study Director
NCT00174837	ICD CSD	Study Director
NCT00174928	Medical Director	Study Director
NCT00174980	M. R Bullock, M.D.	Principal Investigator
NCT00175825	UCB Clinical Trial Call Center	Study Director
NCT00175877	UCB Clinical Trial Call Center	Study Director
NCT00176306	Richard S Morehead, MD	Principal Investigator
NCT00176605	Mark Stein, MD	Principal Investigator
NCT00176748	Francis Worden, M.D.	Principal Investigator
NCT00177307	Nathan Bahary, MD	Principal Investigator
NCT00177333	M Reeves, MD	Principal Investigator
NCT00177372	Mitchell D Creinin, MD	Principal Investigator
NCT00177398	Mary T Korytkowski, MD	Principal Investigator
NCT00177710	Shahid Husain, MD	Principal Investigator
NCT00178269	Yuhchyau Chen, MD, Ph.D	Principal Investigator
NCT00178464	Norma B. Lerner, MD	Principal Investigator
NCT00178490	Marc B. Lande, MD	Principal Investigator
NCT00178503	Deborah A. Pearson, PhD	Principal Investigator
NCT00178841	John A Zic, MD	Principal Investigator
NCT00179179	Alp Ikizler, MD	Principal Investigator
NCT00179218	Alp Ikizler, MD	Principal Investigator
NCT00179309	James L Gulley, M.D., Ph.D.	Principal Investigator
NCT00179621	Jay Backstrom, MD	Study Director
NCT00179647	Robert Knight, MD	Study Director
NCT00179673	Robert Knight, MD	Study Director
NCT00179959	Amy Paller, MD	Principal Investigator
NCT00180011	Emily DiMango, MD	Principal Investigator
NCT00181116	Eric H Kossoff, MD	Principal Investigator
NCT00181623	Corrine K Welt, MD	Principal Investigator
NCT00181844	Janet Wozniak, MD	Principal Investigator
NCT00181870	Janet Wozniak, MD	Principal Investigator
NCT00181883	Janet Wozniak, MD	Principal Investigator
NCT00182689	Barbara Gitlitz	Principal Investigator
NCT00182702	Edwin Posadas	Principal Investigator
NCT00182754	Aminah Jatoi, MD	Study Chair
NCT00182767	Ellen Chuang	Principal Investigator
NCT00182793	George Somlo, MD	Principal Investigator
NCT00182845	Malaz Boustani, MD, MPH	Principal Investigator
NCT00183092	Michael Geschwind, MD, PhD	Principal Investigator
NCT00183092	Bruce L. Miller, MD	Principal Investigator
NCT00183222	Raymond F Anton, MD	Principal Investigator
NCT00183235	Raymond F. Anton, MD	Principal Investigator
NCT00183261	Susan Little, MD	Study Chair
NCT00183261	Douglas D. Richman, MD	Study Chair
NCT00183339	Linmarie Sikich, MD	Study Chair
NCT00183443	Trisha Suppes, MD, PhD	Principal Investigator
NCT00183729	Eric J. Lenze, MD	Principal Investigator
NCT00183937	David Quinn, MD	Principal Investigator
NCT00185562	Mark C Genovese, MD	Principal Investigator
NCT00186017	Terence Arthur Ketter	Principal Investigator
NCT00186043	Terence Ketter, MD	Principal Investigator
NCT00186628	David Miklos	Principal Investigator
NCT00187148	Pat Flynn, MD	Principal Investigator
NCT00187941	Herwig-Ulf Meier-Kriesche, MD	Principal Investigator
NCT00188617	Thomas Waddell, MD FRCSC	Principal Investigator
NCT00189150	Jeong M Park, MS, PharmD	Principal Investigator
NCT00189488	MD	Study Director
NCT00189514	Lisa Porter, MD	Study Director
NCT00190671	Call 1-877-CTLILLY (1-877-285-4559) or 1-317-615-4559 Mon-Fri from 9am- 5pm Eastern time (UTC/GMT - 5 hours, EST)	Study Director
NCT00190853	Call 1-877-CTLILLY (1-877-285-4559) or 1-317-615-4559 Mon-Fri 9 AM – 5 PM Eastern time (UTC/GMT - 5 hours, EST)	Study Director
NCT00190866	Call 1-877-CTLILLY (1-877-285-4559) or 1-317-615-4559 Mon-Fri 9 AM - 5 PM Eastern time (UTC/GMT - 5 hours, EST)	Study Director
NCT00190879	Call 1-877-CTLILLY (1-877-285-4559) or 317-615-4559 Mon-Fri 9 AM - 5 PM Eastern Time (UTC/GMT - 5 hours,EST)	Study Director
NCT00190918	David Miller, MD	Study Chair
NCT00190983	David Miller, MD	Study Chair
NCT00191412	Call 1-877-CTLILLY (1-877-285-4559) or 1-317-615-4559 Mon - Fri 9 AM - 5 PM Eastern time (UTC/GMT) - 5 hours, EST)	Study Director
NCT00193180	Denise A. Yardley, MD	Principal Investigator
NCT00193206	Denise A. Yardley, MD	Principal Investigator
NCT00193219	David R. Spigel, MD	Principal Investigator
NCT00193414	David R. Spigel, MD	Principal Investigator
NCT00193453	David R. Spigel, MD	Principal Investigator
NCT00193492	John D Hainsworth, MD	Principal Investigator
NCT00193648	Howard Trachtman, MD	Principal Investigator
NCT00193648	Debbie Gipson, MD	Principal Investigator
NCT00193648	Tom Greene, PhD	Principal Investigator
NCT00193687	Global Clinical Director Solvay	Study Director
NCT00193713	Global Clinical Director Solvay	Study Director
NCT00194649	John Amory	Principal Investigator
NCT00194675	Alvin M Matsumoto, MD	Principal Investigator
NCT00195208	Medical Monitor	Study Director
NCT00195351	Medical Monitor	Study Director
NCT00195546	Medical Monitor	Study Director
NCT00195546	Trial Manager	Principal Investigator
NCT00195546	Trial Manager	Principal Investigator
NCT00195546	Trial Manager	Principal Investigator
NCT00195546	Trial Manager	Principal Investigator
NCT00195546	Trial Manager	Principal Investigator
NCT00195546	Trial Manager	Principal Investigator
NCT00195546	Trial Manager	Principal Investigator
NCT00195546	Trial Manager	Principal Investigator
NCT00195637	William A Gahl, M.D.	Principal Investigator
NCT00195728	Rita Jain, MD	Study Director
NCT00196326	Duramed Protocol Chair	Study Chair
NCT00196339	Duramed Protocol Chair	Study Chair
NCT00196365	Duramed Protocol Chair	Study Chair
NCT00196391	Duramed Protocol Chair	Study Chair
NCT00196989	GSK Clinical Trials	Study Director
NCT00197028	GSK Clinical Trials	Study Director
NCT00197054	GSK Clinical Trials	Study Director
NCT00197080	GSK Clinical Trials	Study Director
NCT00197223	GSK Clinical Trials	Study Director
NCT00197262	GSK Clinical Trials	Study Director
NCT00197288	GSK Clinical Trials	Study Director
NCT00198055	Kimberly A. Stigler, MD	Principal Investigator
NCT00198107	Christopher J. McDougle, MD	Principal Investigator
NCT00198133	Patrick Loehrer, M.D.	Principal Investigator
NCT00198198	Amit Anand, MD	Principal Investigator
NCT00198289	Seth Hetherington, M.D.	Study Director
NCT00198471	Jon Williams, PhD	Study Director
NCT00198523	Tim McNamara, PharmD	Study Director
NCT00198536	Tim McNamara, PharmD	Study Director
NCT00199433	Neil Sussman, MD	Study Director
NCT00199446	James Williams, MD	Study Director
NCT00199888	Chaitanya R Divgi, MD	Principal Investigator
NCT00199888	Pual Russo, MD	Principal Investigator
NCT00201123	William Rom, MD, MPH	Principal Investigator
NCT00201864	Ewa Mrozek, MD	Principal Investigator
NCT00202696	Philip Jochelson, MD	Study Director
NCT00202878	Medical Director	Study Director
NCT00203320	Edward L. Tobinick, M.D.	Principal Investigator
NCT00203372	Fairooz Kabbinavar, MD	Study Chair
NCT00203424	Fairooz Kabbinavar, MD	Study Chair
NCT00203476	Raela B Williford, PharmD	Principal Investigator
NCT00203502	Issam Makhoul, MD	Principal Investigator
NCT00203567	Lori L Davis, MD	Principal Investigator
NCT00203957	Arif Dalvi, M.D.	Principal Investigator
NCT00204776	Sherry Morgan-Meadows	Principal Investigator
NCT00205179	Carey E Gleason, PhD	Principal Investigator
NCT00205426	Robert Love, MD	Principal Investigator
NCT00205660	John W. Newcomer, MD	Principal Investigator
NCT00205946	Diego A Pizzagalli, PhD	Principal Investigator
NCT00206076	David J Reich, MD	Principal Investigator
NCT00206141	AstraZeneca Seroquel Medical Science Director, MD	Study Director
NCT00206154	AstraZeneca Symbicort Medical Science Director, MD	Study Director
NCT00206167	AstraZeneca Symbicort Medical Science Director, MD	Study Director
NCT00206388	Peter Zage, MD	Principal Investigator
NCT00206583	Bayer Study Director	Study Director
NCT00206726	Bayer Study Director	Study Director
NCT00207051	Bristol-Myers Squibb	Study Director
NCT00207077	Call 1-877-CTLILLY (1-877-285-4559) or 1-317-615-4559 Mon - Fri 9 AM - 5 PM Eastern time (UTC/GMT - 5 hours, EST)	Study Director
NCT00207090	Bristol-Myers Squibb	Study Director
NCT00207116	Call 1-877-CTLILLY (1-877-285-4559) or 1-317-615-4559 Mon - Fri 9 AM - 5 PM Eastern time (UTC/GMT - 5 hours, EST)	Study Director
NCT00207311	Stephen A Harrison, MD	Principal Investigator
NCT00207402	Stephen A Harrison, MD	Principal Investigator
NCT00207402	Shane Mills, MD	Principal Investigator
NCT00208026	Albert C Yan, MD	Principal Investigator
NCT00208156	Katherine Beebe, PhD	Study Director
NCT00208169	Pirzada S. Sattar, M.D.	Principal Investigator
NCT00208767	Arshed Quyyumi, MD	Principal Investigator
NCT00208793	Roberd M Bostick, MD, MPH	Principal Investigator
NCT00209092	Amelia Zelnak, MD	Principal Investigator
NCT00209313	Francois-Xavier Mbopi-Keou, M.Sc, PhD	Principal Investigator
NCT00210470	Jeffrey S. Moyer, MD	Principal Investigator
NCT00210496	Janssen Ortho LLC Clinical Trial	Study Director
NCT00210522	Johnson &amp; Johnson Pharmaceutical Research &amp; Development, L.L. C. Clinical Trial	Study Director
NCT00210535	Johnson &amp; Johnson Pharmaceutical Research &amp; Development, L.L. C. Clinical Trial	Study Director
NCT00210548	Johnson &amp; Johnson Pharmaceutical Research &amp; Development, L.L. C. Clinical Trial	Study Director
NCT00210574	Johnson &amp; Johnson Pharmaceutical Research &amp; Development, L.L. C. Clinical Trial	Study Director
NCT00210587	Johnson &amp; Johnson Pharmaceutical Research &amp; Development, L.L. C. Clinical Trial	Study Director
NCT00210600	Johnson &amp; Johnson Pharmaceutical Research &amp; Development, L.L. C. Clinical Trial	Study Director
NCT00210704	Johnson &amp; Johnson Pharmaceutical Research &amp; Development, L.L. C. Clinical Trial	Study Director
NCT00210717	Johnson &amp; Johnson Pharmaceutical Research &amp; Development, L.L. C. Clinical Trial	Study Director
NCT00210899	Johnson &amp; Johnson Pharmaceutical Research &amp; Development, L.L. C. Clinical Trial	Study Director
NCT00210964	Johnson &amp; Johnson Pharmaceutical Research &amp; Development, L.L. C. Clinical Trial	Study Director
NCT00211250	Cosme O Lozano, M.D.	Principal Investigator
NCT00211276	Myron Czuczman, MD	Principal Investigator
NCT00211393	K. Bailey Freund, MD	Principal Investigator
NCT00211432	Lawrence Yannuzzi, MD	Principal Investigator
NCT00211458	Jason S Slakter, MD	Principal Investigator
NCT00211692	Samuel B. Ho, M.D.	Principal Investigator
NCT00211887	Fred Lublin, MD	Principal Investigator
NCT00211900	Matt Hohenboken, MD, PhD	Study Director
NCT00211939	Wajeh Y Qunibi, M.D.	Study Chair
NCT00211978	Wajeh Y Qunibi, M.D.	Study Chair
NCT00211991	Matt Hohenboken, MD, PhD	Study Director
NCT00212316	Steven M. Hersch, MD, PhD	Principal Investigator
NCT00212316	Karl Kieburtz, MD, MPH	Principal Investigator
NCT00212641	Joseph G Bisaha, Ph.D.	Study Director
NCT00212758	Amira Y Al-Uzri, M.D.	Principal Investigator
NCT00212810	Ortho McNeil Neurologics, Inc. Clinical Trial	Study Director
NCT00212875	Johnson &amp; Johnson Pharmaceutical Research &amp; Development, L.L. C. Clinical Trial	Study Director
NCT00213135	Steven J. Greenberg, M.D.	Study Director
NCT00213148	Donald R Tredway, M.D., PhD	Study Director
NCT00213993	Paul R Hutson, PharmD	Principal Investigator
NCT00214266	Hans Sollinger, MD	Principal Investigator
NCT00214461	Thomas P Marbury, MD	Principal Investigator
NCT00214461	Richard Greenberg, MD	Principal Investigator
NCT00214500	Karin Ludwig, M.D.	Study Director
NCT00214604	AstraZeneca Crestor Medical Sciences Director, MD	Study Director
NCT00214617	Anh Le, PhD	Principal Investigator
NCT00214786	Marlon Levy, MD	Principal Investigator
NCT00214890	Richard H Haubrich, MD	Study Chair
NCT00215228	Wei Zhang, M.D., Ph. D	Principal Investigator
NCT00216099	Christopher Sweeney, M.B.B.S.	Study Chair
NCT00216203	Nasser Hanna, M.D.	Study Chair
NCT00216294	Anantha Shekhar, MD, PhD	Principal Investigator
NCT00216879	T A Luger, Dr. med.	Principal Investigator
NCT00217048	Adil E Bharucha, MBBS, M.D.	Principal Investigator
NCT00217165	Beth L Murphy, MD, PhD	Principal Investigator
NCT00217204	McNeil Consumer &amp; Specialty Pharmaceuticals, a Division of Mc Neil-PPC, Inc. Clinical Trial	Study Director
NCT00217373	William Carson	Principal Investigator
NCT00217399	Claudine Isaacs	Principal Investigator
NCT00217412	Maryam Fouladi	Principal Investigator
NCT00217425	Kristen N. Ganjoo, MD	Study Chair
NCT00217438	William Bensinger	Principal Investigator
NCT00217503	Richard F. Little, MD	Principal Investigator
NCT00217516	Michael R. Kuettel, MD, PhD	Principal Investigator
NCT00217542	Mario Sznol	Principal Investigator
NCT00217568	Leona A. Holmberg, MD, PhD	Principal Investigator
NCT00217620	Margaret von Mehren, MD	Study Chair
NCT00217620	George D. Demetri, MD	Study Chair
NCT00217646	Jorge Cortes	Principal Investigator
NCT00217672	Sara Hurvitz, MD	Principal Investigator
NCT00217971	Frances R Levin, MD	Principal Investigator
NCT00218062	Joy M. Schmitz, PhD	Principal Investigator
NCT00218283	Dorothy Hatsukami, PhD	Principal Investigator
NCT00218296	Dorothy Hatsukami, PhD	Principal Investigator
NCT00218426	George Woody, MD	Principal Investigator
NCT00218465	Maurizio Fava, M.D.	Principal Investigator
NCT00218465	Eden Evins, M.D., M.P.H.	Principal Investigator
NCT00218491	Robert Malcolm, M.D.	Principal Investigator
NCT00218517	Brent A Moore, Ph.D.	Principal Investigator
NCT00219011	Novartis Pharmaceuticals	Study Director
NCT00219050	Novartis Pharmaceuticals	Study Director
NCT00219063	Novartis Pharmaceuticals	Study Director
NCT00219076	Novartis Pharmaceuticals	Study Director
NCT00219102	Novartis Pharmaceuticals	Study Director
NCT00219115	Novartis Pharmaceuticals	Study Director
NCT00219141	Novartis Pharmaceuticals	Study Director
NCT00219154	Novartis Pharmaceuticals	Study Director
NCT00219167	Novartis Pharmaceuticals	Study Director
NCT00219180	Novartis Pharmaceuticals	Study Director
NCT00219193	Novartis Pharmaceuticals	Study Director
NCT00219297	Novartis Pharmaceuticals	Study Director
NCT00219349	Franklin R. Schneier, M.D.	Principal Investigator
NCT00219349	Kenneth D Belzer, Ph.D.	Principal Investigator
NCT00219557	Pfizer CT.gov Call Center	Study Director
NCT00219609	Pfizer CT.gov Call Center	Study Director
NCT00219635	Pfizer CT.gov Call Center	Study Director
NCT00219817	William Polvino, MD	Study Director
NCT00219843	Eric Wachter, Ph.D.	Study Director
NCT00219882	Chris Goss, MD, MSc	Principal Investigator
NCT00220584	Allan L Reiss	Principal Investigator
NCT00220636	David J. Hellerstein, MD	Principal Investigator
NCT00220818	Medical Director	Study Director
NCT00220857	Robert S Fisher, MD	Principal Investigator
NCT00221299	Nancy E Lane, MD	Principal Investigator
NCT00221325	James L. Rubenstein, MD PhD	Study Chair
NCT00221338	Jacqueline M Leung, MD, MPH	Principal Investigator
NCT00221416	Robert A Kowatch, MD	Principal Investigator
NCT00221442	Susan L McElroy, MD	Principal Investigator
NCT00221962	Robert L Findling, MD	Principal Investigator
NCT00222170	Jerzy Sarosiek, PhD	Principal Investigator
NCT00222170	Mojtaba S. Olyaee, MD	Principal Investigator
NCT00222469	Mehrdad Jafari, MD, PhD	Principal Investigator
NCT00222729	Julie Bauman, MD	Principal Investigator
NCT00222872	Mara J. Horwitz, M.D.	Principal Investigator
NCT00223210	Sherwood Brown, MD, PhD	Principal Investigator
NCT00223223	E. Sherwood Brown, M.D., Ph.D.	Principal Investigator
NCT00223236	E. Sherwood Brown, PH.D., M.D.	Principal Investigator
NCT00223275	Edson S Brown, MD, PhD	Principal Investigator
NCT00223509	Vivek - Singh, MD	Principal Investigator
NCT00223509	Charles L Bowden, MD	Principal Investigator
NCT00223626	Bankole A. Johnson, DSc,MD.PhD	Principal Investigator
NCT00223639	Bankole A Johnson, DSc,MD,PhD	Principal Investigator
NCT00223704	Mias Pretorius, MBChB	Principal Investigator
NCT00223951	Jack V Greiner, OD, DO, PhD	Principal Investigator
NCT00223990	Bernhards Ogutu, M.D.	Principal Investigator
NCT00224107	Lawrence Hill, PharmD, RPh	Study Director
NCT00224120	Lawrence Hill, PharmD, RPh	Study Director
NCT00224133	Lawrence Hill, Pharm D, RPh	Study Director
NCT00224289	Bruce Shields, MD	Principal Investigator
NCT00224445	John Flaherty	Study Director
NCT00224770	Daniel F. Hanley, MD	Study Chair
NCT00224770	Mario Zuccarello, MD	Principal Investigator
NCT00224770	Paul Vespa, MD	Principal Investigator
NCT00224874	Mary Horowitz, MD	Study Director
NCT00225017	Robert L Murphy, MD	Study Chair
NCT00225017	James H Stein, MD	Study Chair
NCT00225095	Michelle Williams, Ph.D.	Study Director
NCT00225121	Pfizer CT.gov Call Center	Study Director
NCT00225147	Anurag Relan, MD	Study Director
NCT00225420	Young Whang, MD, PhD	Principal Investigator
NCT00225433	Kurt T Barnhart, MD, MSCE	Principal Investigator
NCT00225615	Alex Dorenbaum, MD	Study Chair
NCT00225784	J Marc Pipas, MD	Principal Investigator
NCT00225823	GSK Clinical Trials	Study Director
NCT00225862	GSK Clinical Trials	Study Director
NCT00226005	Tomislav Dragovich, MD, PhD	Principal Investigator
NCT00226057	Eric L Simpson, MD	Principal Investigator
NCT00226239	Julie Bauman, MD	Principal Investigator
NCT00226655	William Shapiro, MD	Principal Investigator
NCT00226772	Scott Houston	Study Director
NCT00226811	Pfizer CT.gov Call Center	Study Director
NCT00227266	Kathryn J Swoboda, M.D.	Principal Investigator
NCT00227513	George Wilding	Principal Investigator
NCT00227539	Renato Martins, MD, MPH	Principal Investigator
NCT00227565	James R. Jett, MD	Study Chair
NCT00227591	Ayalew Tefferi	Principal Investigator
NCT00227630	Paul Van Schil, MD, PhD	Study Chair
NCT00227760	Srikala Sridhar	Principal Investigator
NCT00228059	Novartis Pharmcuticals	Study Chair
NCT00228449	Affymax	Study Director
NCT00228462	AstraZeneca Seroquel Medical Science Director, MD	Study Director
NCT00228566	Sponsor's Medical Expert, MD	Study Director
NCT00228605	Gwendolyn Neibler, DO	Study Director
NCT00229008	Johnson &amp; Johnson Pharmaceutical Research &amp; Development, L.L. C. Clinical Trial	Study Director
NCT00229138	Novartis	Study Director
NCT00229203	Paul Richardson, MD	Study Chair
NCT00229437	Medical Director	Study Director
NCT00229593	William J Bremner, MD, PhD	Principal Investigator
NCT00229593	Christina Wang, MD	Principal Investigator
NCT00229619	Sabrina Martyr, MD	Principal Investigator
NCT00229632	Kenneth H Fischbeck, M.D.	Principal Investigator
NCT00230126	Miguel Villalona, M.D.	Principal Investigator
NCT00230516	Nexium Medical Science Director, MD	Study Director
NCT00230542	Ursula Matulonis, MD	Principal Investigator
NCT00230568	James Prodafikas	Study Director
NCT00230776	Pfizer CT.gov Call Center	Study Director
NCT00230789	Pfizer CT.gov Call Center	Study Director
NCT00230828	Global Clinical Director Solvay	Study Director
NCT00231166	Novartis Pharmaceuticals	Study Director
NCT00231166	Novartis Pharmaceuticals	Study Director
NCT00231218	michael l macknin, m.d.	Study Director
NCT00231335	Dragan Bugarski-Kirola, MD	Principal Investigator
NCT00231413	GSK Clinical Trials	Study Director
NCT00231478	Clinical Trials	Study Director
NCT00231569	Medical Monitor	Study Director
NCT00231725	Call 1-877-CTLILLY (1-877-285-4559) or 1-317-615-4559 Mon - Fri 9 AM - 5 PM Eastern time (UTC/GMT - 5 hours, EST)	Study Director
NCT00231777	Medical Monitor	Study Director
NCT00231790	Medical Monitor	Study Director
NCT00231816	Medical Monitor	Study Director
NCT00232141	Pfizer CT.gov Call Center	Study Director
NCT00232154	Pfizer CT.gov Call Center	Study Director
NCT00232180	Pfizer CT.gov Call Center	Study Director
NCT00232297	ICD CSD	Study Director
NCT00232310	ICD CSD	Study Director
NCT00232414	Melissa DelBello, MD	Principal Investigator
NCT00232479	Judith Hurley	Principal Investigator
NCT00232596	GSK Clinical Trials	Study Director
NCT00232635	Stephen MacKinnon	Principal Investigator
NCT00232726	Svein Dueland, MD, Ph.D	Principal Investigator
NCT00232947	Nancy Bouveret, MD	Study Director
NCT00233012	Johnson &amp; Johnson Pharmaceutical Research &amp; Development, L.L. C. Clinical Trial	Study Director
NCT00233025	Call 1-877-CTLILLY (1-877-285-4559) or 1-317-615-4559 Mon - Fri 9 AM - 5 PM Eastern time (UTC/GMT - 5 hours, EST)	Study Director
NCT00233064	Genny Losonsky, MD	Study Director
NCT00233155	Jeffrey Tobias, MD	Study Director
NCT00233402	H Barton Grossman	Principal Investigator
NCT00233480	Tamara B Horwich, MD	Principal Investigator
NCT00233519	Richard T. Moxley, III, M.D.	Principal Investigator
NCT00233883	Clinical Trials	Study Director
NCT00233935	Charles Lightdale	Principal Investigator
NCT00233961	Gwen L. Nichols, MD	Study Chair
NCT00234039	Eila C. Skinner, MD	Study Chair
NCT00234091	Kiat Ruxrungtham, MD, MPH	Study Chair
NCT00234091	Saphonn Vonthanak, MD, PhD	Study Chair
NCT00234195	Rajnish Mago, MD	Principal Investigator
NCT00234494	Christopher Sweeney, M.B.B.S.	Study Chair
NCT00234663	John P Clancy, MD	Principal Investigator
NCT00234702	Dr. William F Finn	Principal Investigator
NCT00234819	Medical Monitor	Study Director
NCT00235274	Anantha Shekhar, MD, PhD	Principal Investigator
NCT00235391	Novartis Pharmaceuticals	Study Director
NCT00235625	Joel M Gelfand, MD/MSCE	Principal Investigator
NCT00235716	Maurice Dysken	Study Chair
NCT00235729	Charles W. Gorodetzky	Study Chair
NCT00235755	GSK Clinical Trials	Study Director
NCT00235820	Global Medical Information	Study Director
NCT00236080	Gwendolyn Neibler, DO	Study Director
NCT00236093	John Messina	Study Director
NCT00236184	Yufang Lu, MD, PhD	Study Director
NCT00236197	Yufang Lu	Study Director
NCT00237237	Novartis Pharmaceuticals	Study Director
NCT00237250	Novartis Pharmaceuticals	Study Director
NCT00237354	Eric Wachter, Ph.D.	Study Director
NCT00237354	Chris Wynne, M.D.	Principal Investigator
NCT00237640	Steve M Blevins, M.D.	Principal Investigator
NCT00237666	Michael R Liebowitz, MD	Principal Investigator
NCT00237718	Jonathan Himmelfarb, MD	Principal Investigator
NCT00237718	Alp Ikizler, MD	Principal Investigator
NCT00238108	Frank AJ Scheer, PhD	Principal Investigator
NCT00238121	Gini Fleming	Principal Investigator
NCT00238212	Anthony El-Khoueiry	Principal Investigator
NCT00238303	Evanthia Galanis	Principal Investigator
NCT00238394	Steven Alberts	Principal Investigator
NCT00238420	M. Dror Michaelson	Principal Investigator
NCT00238485	Novartis Customer Care information	Study Chair
NCT00238732	Medical Monitor	Study Director
NCT00239135	Lawrence Anderson, MD, F.A.C.P	Principal Investigator
NCT00239148	Aleksandra Pastrak, M.D.	Study Director
NCT00239187	Aleksandra Pastrak, M.D.	Study Director
NCT00239239	MD	Study Director
NCT00239551	Qiang Cai, MD, PhD	Principal Investigator
NCT00239551	Vincent W Yang, MD, PhD	Study Director
NCT00239564	James W. Tetrud, MD	Principal Investigator
NCT00239577	GSK Clinical Trials	Study Director
NCT00239642	David Bregman, M.D., Ph.D.	Study Director
NCT00239876	Novartis	Study Director
NCT00239915	Jon F. Heiser, M.D.	Principal Investigator
NCT00239967	ICD CSD	Study Director
NCT00239993	MerriKay Oleen-Burkey, Ph.D	Study Director
NCT00240071	Carla Falkson, MD	Principal Investigator
NCT00240097	Francisco Robert, MD	Principal Investigator
NCT00240110	Ihsan M Salloum, MD, MPH	Principal Investigator
NCT00240253	Lisa Porter, MD	Study Director
NCT00240617	GSK Clinical Trials	Study Director
NCT00240630	GSK Clinical Trials	Study Director
NCT00240643	GSK Clinical Trials	Study Director
NCT00240981	Shalender Bhasin, MD	Principal Investigator
NCT00240981	Shehzad Basaria, MD	Study Director
NCT00240981	Wildon Farwell, MD, MPH	Principal Investigator
NCT00240994	William Harmon, MD	Study Chair
NCT00241176	Barbara J Coffey, M.D, M.S.	Principal Investigator
NCT00241319	Ingerman Avner, MD	Study Director
NCT00241423	James Malone, MD	Study Director
NCT00241436	AstraZeneca Arimidex Medical Sciences Director, MD	Study Director
NCT00241722	GSK Clinical Trials, MD	Study Director
NCT00241839	Mark S. Segal, MD, PhD	Principal Investigator
NCT00242164	Panduranga S Rao, MD, DNB, MS	Principal Investigator
NCT00242281	Susan P Clausen, PhD	Study Director
NCT00242385	Jeff Garrett, MD	Principal Investigator
NCT00242424	Janet A Englund, MD	Study Chair
NCT00242476	Medical Monitor	Study Director
NCT00242502	Ahmed Kaseb, M.D.	Principal Investigator
NCT00242580	Novartis Pharmaceuticals	Study Chair
NCT00242710	Pfizer CT.gov Call Center	Study Director
NCT00242736	AstraZeneca Nexium Medical Sciences Director, MD	Study Director
NCT00243061	Elaine McWhirter	Principal Investigator
NCT00243074	Linda Garland	Principal Investigator
NCT00243100	Gauri Varadhachary	Principal Investigator
NCT00243191	Scott Schuetze, MD, PhD	Principal Investigator
NCT00243243	Myung S Park, MD	Principal Investigator
NCT00243347	AstraZeneca Oncology Medical Sciences Director, MD	Study Director
NCT00243386	Peter Collins, MD	Principal Investigator
NCT00243412	William Reiss, Pharm.D.	Study Director
NCT00243503	Pfizer CT.gov Call Center	Study Director
NCT00243542	Steven Garrett, MS, DDS	Study Director
NCT00243659	Medical Monitor	Study Director
NCT00243711	Mark Curtis, O.D.	Principal Investigator
NCT00243789	Diana Escolar, MD	Study Chair
NCT00243854	Higinia Cardenes, M.D., PhD	Principal Investigator
NCT00243854	Gabriela Chiorean, M.D.	Principal Investigator
NCT00243867	Robert Bellet, MD	Study Director
NCT00243880	Mitchell Elkind, MD, MS	Principal Investigator
NCT00243880	Ji Chong, MD	Principal Investigator
NCT00243932	Petra Kaufmann, MD	Principal Investigator
NCT00243932	J. L. P. Thompson, Ph.D.	Principal Investigator
NCT00243932	Hiroshi Mitsumoto	Principal Investigator
NCT00244140	Bayer Study Director	Study Director
NCT00244244	Merit Cudkowicz, MD	Principal Investigator
NCT00244244	Jeremy Shefner, MD	Principal Investigator
NCT00244309	Jay P Ciezki, MD	Principal Investigator
NCT00244322	Call 1-877-CTLILLY (1-877-285-4559) or 1-317-615-4559 Mon - Fri 9 AM - 5 PM Eastern time (UTC/GMT - 5 hours, EST)	Study Director
NCT00244361	Michael R Pranzatelli, M.D.	Principal Investigator
NCT00244543	Ingerman Avner, MD	Study Director
NCT00244569	Mitchell L. Shiffman, MD	Principal Investigator
NCT00244712	GSK Clinical Trials	Study Director
NCT00244725	GSK Clinical Trials	Study Director
NCT00244751	GSK Clinical Trials	Study Director
NCT00244764	GSK Clinical Trials	Study Director
NCT00244816	Agop Bedikian, MD	Study Director
NCT00244881	Harold Burstein	Principal Investigator
NCT00244985	Myron S. Czuczman, MD	Principal Investigator
NCT00244998	Donald L. Trump, MD	Principal Investigator
NCT00245024	Patricia Thompson, PhD	Study Chair
NCT00245037	Richard Maziarz, MD	Study Chair
NCT00245063	Marianna Koczywas	Principal Investigator
NCT00245102	Robert Maki	Principal Investigator
NCT00245206	Dilip V. Jeste, MD	Principal Investigator
NCT00245245	Josef N Mueksch, MD, MBA	Principal Investigator
NCT00245258	Pfizer CT.gov Call Center	Study Director
NCT00245336	Thomas C Reynolds, MD, PhD	Study Director
NCT00245336	William Chapman, MD	Principal Investigator
NCT00245336	Kenneth Renkens, MD	Principal Investigator
NCT00245336	Fred Weaver, MD	Principal Investigator
NCT00245518	Shehzad Basaria, M.D.	Principal Investigator
NCT00245570	Medical Monitor	Study Director
NCT00245622	Edward J Fox, M.D., Ph.D.	Study Chair
NCT00245622	Jaye Thompson, Ph.D.	Study Director
NCT00245973	Medical Monitor, MD	Study Director
NCT00246012	Centocor, Inc. Clinical Trial	Study Director
NCT00246090	Dale Shuster, Ph.D.	Study Director
NCT00246207	Janssen-Ortho Inc. Clinical Trial	Study Director
NCT00246233	Janssen-Ortho Inc. Clinical Trial	Study Director
NCT00246337	Medical Monitor	Study Director
NCT00246363	Henry Sacks, Ph.D., MD	Principal Investigator
NCT00246467	Eric Sheldon, MD	Principal Investigator
NCT00246519	Julie A Johnson, PharmD	Principal Investigator
NCT00246532	Lawrence F Chu, MD, MS	Principal Investigator
NCT00246571	Pfizer CT.gov Call Center	Study Director
NCT00246610	Pfizer CT.gov Call Center	Study Director
NCT00246623	Pfizer CT.gov Call Center	Study Director
NCT00246636	GSK Clinical Trials	Study Director
NCT00246662	Glenn Michelson, MD	Study Director
NCT00246701	GSK Clinical Trials	Study Director
NCT00246753	Young Whang, MD, PhD	Principal Investigator
NCT00246909	Hartmut Heinze, PhD	Study Chair
NCT00247078	Richard C Dart, MD PhD	Principal Investigator
NCT00247078	Walter Garcia, MD	Study Director
NCT00247273	Sal Bartelmo, MD	Study Director
NCT00247390	Medical Director Clinical Science	Study Director
NCT00247416	John Rinehart	Principal Investigator
NCT00247572	Donald Jasinski, MD	Principal Investigator
NCT00247676	Pfizer CT.gov Call Center	Study Director
NCT00248092	Donald R. Jasinski, MD	Principal Investigator
NCT00248170	Novartis Pharmaceuticals	Study Director
NCT00248248	Jeffrey F Hines, MD, FACOG	Principal Investigator
NCT00248534	Lauren E. Abrey, MD	Study Chair
NCT00248560	Ammar Sukari, M.D.	Principal Investigator
NCT00248638	Thomas R Ziegler, MD	Principal Investigator
NCT00248651	Earnest P Bouras, M.D.	Principal Investigator
NCT00248651	John K. DiBaise, M.D.	Principal Investigator
NCT00248651	Colin P Howden, M.D.	Principal Investigator
NCT00248651	Charlene M Prather, M.D.	Principal Investigator
NCT00248651	Nicholas J Talley, M.D.,Ph.D.	Study Chair
NCT00248651	Brian E. Lacy, M.D., Ph.D.	Principal Investigator
NCT00248651	G. R. Locke, III, M.D.	Principal Investigator
NCT00248651	Bincy P Abraham, M.D., M.S.	Principal Investigator
NCT00248651	Hashem El-Serag, M.D.	Principal Investigator
NCT00248651	Paul Moayyedi, M.D.	Principal Investigator
NCT00248833	Barnett Gibbs, MD	Principal Investigator
NCT00249041	MD	Study Director
NCT00249262	Agop Bedikian, MD	Study Director
NCT00249405	Robert M. Anthenelli, MD	Principal Investigator
NCT00249444	Herbert Kleber, MD	Principal Investigator
NCT00249782	Steven Garrett, MS, DDS	Study Director
NCT00249912	Medical Director	Study Director
NCT00249938	Sunny Linnebur, Pharm.D.	Principal Investigator
NCT00250172	Masahiro Fujita, M.D.	Principal Investigator
NCT00250276	GSK Clinical Trials	Study Director
NCT00250341	Michelle Zeidler, MD	Principal Investigator
NCT00250419	Medical Monitor	Study Director
NCT00250432	Medical Monitor	Study Director
NCT00250458	Medical Monitor	Study Director
NCT00250601	Clinical Sciences &amp; Operations	Study Director
NCT00250614	Lisa ARVANITIS, MD	Study Director
NCT00250653	Clinical Sciences &amp; Operations	Study Director
NCT00250679	Sepracor Medical Director	Study Director
NCT00250822	Yehuda Patt, MD	Principal Investigator
NCT00250926	Steven P. Treon, MD, MA, PhD	Principal Investigator
NCT00250978	Christopher G. Azzoli, M.D.	Principal Investigator
NCT00251004	Novartis	Study Director
NCT00251030	Pfizer CT.gov Call Center	Study Director
NCT00251225	Leonard J Appleman, MD	Principal Investigator
NCT00251303	Susan E Swedo, MD	Principal Investigator
NCT00251316	Monica C Skarulis, M.D.	Principal Investigator
NCT00251446	Marcos Joppert, MD	Principal Investigator
NCT00251459	Tsontcho Ianchulev, M.D.	Study Director
NCT00251472	Barry Mirtsching, MD	Principal Investigator
NCT00251524	John Waples, MD	Principal Investigator
NCT00251680	Medical Director	Study Director
NCT00251693	Medical Director	Study Chair
NCT00251719	Medical Director	Study Director
NCT00251732	Ronnie Fass, MD	Principal Investigator
NCT00251745	Medical Director	Study Director
NCT00251758	Medical Director	Study Director
NCT00252148	David Ho, MD	Principal Investigator
NCT00252148	Michael Keefer, MD	Principal Investigator
NCT00252148	Soe Than, MD	Study Director
NCT00252291	David Pearlman, MD	Principal Investigator
NCT00252330	ICD CSD	Study Director
NCT00252343	ICD CSD	Study Director
NCT00252356	ICD CSD	Study Director
NCT00252382	Glenn Michelson, MD	Study Director
NCT00252564	Allen Cohn, MD	Principal Investigator
NCT00252564	Leonard Saltz, M.D.	Principal Investigator
NCT00253344	Matthew M. Cooney, MD	Study Chair
NCT00253370	Weijing Sun, MD	Study Chair
NCT00253435	Gregory Yanik, MD	Study Chair
NCT00253435	Katherine K. Matthay, MD	Principal Investigator
NCT00253435	John M. Maris, MD	Principal Investigator
NCT00253474	Brigitte C. Widemann, MD	Principal Investigator
NCT00253513	Eneida Nemecek, MD	Principal Investigator
NCT00253578	Mohamad Hussein	Principal Investigator
NCT00253591	Matthew Hatton, MD	Study Chair
NCT00253630	Leslie Popplewell	Principal Investigator
NCT00253747	Eugene Somoza, M.D., Ph.D.	Principal Investigator
NCT00253747	Theresa Winhusen, Ph.D.	Principal Investigator
NCT00253890	Michael D Stein, MD	Principal Investigator
NCT00253890	Rogers Griffith, MD	Study Director
NCT00253903	ICD CSD	Study Director
NCT00253968	ICD	Study Director
NCT00254046	Tibotec Pharmaceuticals Clinical Trial	Study Director
NCT00254254	Lisa Porter, MD	Study Director
NCT00254293	Bristol-Myers Squibb	Study Director
NCT00254397	Patrick Hwu, MD	Principal Investigator
NCT00254449	Jeffrey Tobias, MD	Study Director
NCT00254449	William R. Kennedy, MD	Principal Investigator
NCT00254462	Christopher J. Kratochvil, MD	Principal Investigator
NCT00254488	Robert Young, MD	Study Chair
NCT00254800	James Malone, MD	Study Director
NCT00254826	Mark J. Mulligan, MD	Principal Investigator
NCT00255047	Medical Director	Study Director
NCT00255073	Terence Sanger, md,phd	Principal Investigator
NCT00255086	J. Wesson Ashford Jr., MD, PhD	Study Director
NCT00255086	Jerome A Yesavage	Principal Investigator
NCT00255099	Tibotec Pharmaceuticals Clinical Trial	Study Director
NCT00255125	Peter Vanveldhuizen, MD	Principal Investigator
NCT00255151	Medical Director	Study Chair
NCT00255164	Medical Director	Study Director
NCT00255177	Bruce Bacon, M.D.	Principal Investigator
NCT00255177	Pablo Tebas, M.D.	Principal Investigator
NCT00255177	George Wu, MD	Principal Investigator
NCT00255177	Thomas Marbury, MD	Principal Investigator
NCT00255190	Medical Director	Study Director
NCT00255294	Christine K Mauck, MD	Study Director
NCT00255606	Pirkko Kellokumpu-Lehtinen	Principal Investigator
NCT00255658	Muralidhar Beeram	Principal Investigator
NCT00255749	John A. Glaspy, MD, MPH	Principal Investigator
NCT00255762	Svetomir Markovic	Principal Investigator
NCT00255788	Susan Ellard, MD	Study Chair
NCT00255788	Karen A. Gelmon, MD	Study Chair
NCT00255827	Mary Mulcahy, M.D.	Principal Investigator
NCT00256191	Sandra Silberman, MD	Study Director
NCT00256204	Yoni Weiss, MD	Study Director
NCT00256269	Sai-Hong Ignatius Ou, MD	Principal Investigator
NCT00256334	Randall Holcombe, MD	Principal Investigator
NCT00256451	David Oslin, MD	Principal Investigator
NCT00256542	C. Lowell Parsons, MD	Principal Investigator
NCT00256750	Bristol-Myers Squibb	Study Director
NCT00256854	GSK Clinical Trials	Study Director
NCT00256867	GSK Clinical Trials, MD, PhD	Study Director
NCT00256880	GSK Clinical Trials	Study Director
NCT00256932	GSK Clinical Trials, MD	Study Director
NCT00257010	Janssen Ortho LLC Clinical Trial	Study Director
NCT00257166	Pfizer CT.gov Call Center	Study Director
NCT00257257	ICD CSD	Study Director
NCT00257426	Bert H. O'Neil, MD	Principal Investigator
NCT00257465	David Berd, MD	Principal Investigator
NCT00257608	Donald Strickland, M.D.	Study Director
NCT00257660	Jean-Loic Robin	Study Director
NCT00257673	Stephen Murray, MD, PhD	Study Director
NCT00257712	Michael V. Vitiello, PhD	Principal Investigator
NCT00257712	Suzanne Barsness, RN,MSN,CCRC	Study Director
NCT00257725	Laurence L Greenhill, MD	Principal Investigator
NCT00257933	Joseph J Zorc, MD	Principal Investigator
NCT00258180	David M. Loeb, MD, PhD	Principal Investigator
NCT00258180	Maria Oliva-Hemker, MD	Principal Investigator
NCT00258193	Michael Camilleri, MD	Principal Investigator
NCT00258245	Jeffrey A. Zonder, MD	Study Chair
NCT00258271	Camille Abboud, MD	Principal Investigator
NCT00258323	David J. Adelstein, MD	Study Chair
NCT00258349	Ramona Swaby	Principal Investigator
NCT00258362	Melissa A. Geller, MD	Principal Investigator
NCT00258375	Stephen Chia, MD	Study Chair
NCT00258557	Tibotec Pharmaceuticals Clinical Trial	Study Director
NCT00258778	Eithan Galun, MD	Principal Investigator
NCT00258817	Clinical Trials	Study Director
NCT00258830	Medical Director	Study Director
NCT00258856	Medical Monitor	Study Director
NCT00258895	Medical Director	Study Director
NCT00259012	Medical Monitor	Study Director
NCT00259012	Trial Manager	Principal Investigator
NCT00259012	Trial Manager	Principal Investigator
NCT00259012	Trial Manager	Principal Investigator
NCT00259012	Trial Manager	Principal Investigator
NCT00259012	Trial Manager	Principal Investigator
NCT00259012	Trial Manager	Principal Investigator
NCT00259012	Trial Manager	Principal Investigator
NCT00259129	Bayer Study Director	Study Director
NCT00259311	Call 1-877-CTLILLY (1-877-285-4559) or 1-317-615-4559 Mon-Fri 9 AM - 5 PM Eastern time (UTC/GMT - 5 hours, EST)	Study Director
NCT00259740	MD	Study Director
NCT00259753	Denis O'Shaughnessy, PHD	Study Director
NCT00259805	Kenneth D Laxer, M.D.	Principal Investigator
NCT00259870	GSK Clinical Trials	Study Director
NCT00259922	GSK Clinical Trials, MD	Study Director
NCT00259987	GSK Clinical Trials, MD	Study Director
NCT00260039	Medical Monitor	Study Director
NCT00260065	Eisai US Medical Services	Study Director
NCT00260078	Jennifer King, PharmD	Study Chair
NCT00260078	Ram Yogev, MD	Study Chair
NCT00260156	Novartis Pharmaceuticals	Study Director
NCT00260338	Jens Kastrup, MD DMSc	Principal Investigator
NCT00260481	Walter Ling, M.D.	Principal Investigator
NCT00260533	Murray B Stein, M.D.	Principal Investigator
NCT00260689	Danielle M Townsley, M.D.	Principal Investigator
NCT00260832	Eisai Medical Services	Study Director
NCT00260923	Novartis Pharmaceuticals	Study Director
NCT00261131	Philip E. Gates, MD	Principal Investigator
NCT00261209	Marie A Badalamente, PhD	Principal Investigator
NCT00261209	Edward Wang, MD	Principal Investigator
NCT00261287	Mark A. Wingertzahn, PhD	Study Chair
NCT00261365	Bristol-Myers Squibb	Study Director
NCT00261443	Bristol-Myers Squibb	Study Director
NCT00261547	Nina Tolkoff-Rubin, M.D.	Principal Investigator
NCT00261599	James Jones, MD, PharmD	Study Director
NCT00261833	Senior Director Immonology &amp; Pulmonology, Clinical R&amp;D	Study Director
NCT00261846	Pfizer CT.gov Call Center	Study Director
NCT00261950	MD	Study Director
NCT00262028	Novartis Vaccines	Study Chair
NCT00262106	Sheena McCormack, MBBS, MSc, FRCP	Principal Investigator
NCT00262145	Michael D Levitt, M.D.	Principal Investigator
NCT00262223	Denise A. Hien, PhD	Principal Investigator
NCT00262236	Novartis Pharmaceutical	Study Director
NCT00262483	Medical Monitor	Study Director
NCT00262522	Daniel E Cohen, MD	Study Director
NCT00262600	Boehringer Ingelheim	Study Chair
NCT00262639	Raymond F Anton, MD	Principal Investigator
NCT00262730	Myrna Rosenfeld, MD, PhD	Study Chair
NCT00262743	Tait D. Shanafelt, MD	Study Chair
NCT00262743	Jose F Leis, MD	Principal Investigator
NCT00262821	Paul DiSilvestro	Principal Investigator
NCT00262847	Robert Burger	Principal Investigator
NCT00262860	Jonathan W. Friedberg, MD	Principal Investigator
NCT00262873	Jane L. Liesveld, MD	Study Chair
NCT00262990	Novartis Pharmaceuticals	Study Director
NCT00263068	UCB Clinical Trial Call Center	Study Director
NCT00263185	Antonella Rastelli, M.D.	Principal Investigator
NCT00263211	Katherine Weilbaecher, M.D.	Principal Investigator
NCT00263276	Bristol Myers Squibb	Study Director
NCT00263328	Pfizer CT.gov Call Center	Study Director
NCT00263562	Charles Macias, MD, MPH	Principal Investigator
NCT00263575	Julian Howell	Study Director
NCT00263796	Evdokia Anagnostou, MD	Principal Investigator
NCT00263822	Antonio Jimeno	Study Chair
NCT00264147	Medical Monitor	Study Director
NCT00264290	Peter W. Hunt, M.D.	Principal Investigator
NCT00264420	Roger Macklis, MD	Principal Investigator
NCT00264537	Centocor, Inc. Clinical Trial	Study Director
NCT00264550	Centocor, Inc. Clinical Trial	Study Director
NCT00264576	Novartis Vaccines	Study Chair
NCT00264615	GSK Clinical Trials	Study Director
NCT00264797	Paula Riggs, M.D.	Principal Investigator
NCT00264797	Theresa Winhusen, Ph.D.	Principal Investigator
NCT00264875	Pfizer CT.gov Call Center	Study Director
NCT00264888	Richard Finkel, MD	Principal Investigator
NCT00264901	Global Clinical Registry (GCR, 1452)	Study Director
NCT00264914	ICD CSD	Study Director
NCT00265083	Centocor, Inc. Clinical Trial	Study Director
NCT00265096	Centocor, Inc. Clinical Trial	Study Director
NCT00265265	Louis Cantilena, M.D.	Principal Investigator
NCT00265304	IDEA AG Clinical Trial	Study Director
NCT00265317	Pfizer CT.gov Call Center	Study Director
NCT00265330	Pfizer CT.gov Call Center	Study Director
NCT00265473	Bernhard J. Hering, M.D.	Principal Investigator
NCT00265551	Medical Monitor	Study Director
NCT00265655	Joyce O'Shaughnessy, MD	Principal Investigator
NCT00265733	Edith A. Perez, MD	Study Chair
NCT00265876	Malcolm J. Moore, MD	Study Chair
NCT00265876	Sharlene Gill, MD	Study Chair
NCT00266058	Francesca Aweeka, Pharm.D.	Principal Investigator
NCT00266227	Anshu Vashishtha, MD PhD	Study Director
NCT00266240	Clinical Trials	Study Director
NCT00266253	Clinical Trials	Study Director
NCT00266279	Damian Laber, M.D.	Principal Investigator
NCT00266318	Henry C. Bodenheimer, M.D.	Principal Investigator
NCT00266409	UCB Clinical Trial Call Center	Study Director
NCT00266461	Shunji Mochida, PhD	Study Director
NCT00266604	Johnson &amp; Johnson Pharmaceutical Research &amp; Development, L.L. C. Clinical Trial	Study Director
NCT00266643	Call 1-877-CTLILLY (1-877-285-4559) or 1-317-615-4559 Mon-Fri 9 AM - 5 PM Eastern time UTC/GMT - 5 hours, EST	Study Director
NCT00266656	Call 1-877-CTLILLY (1-877-285-4559) or 1-317-615-4559 Mon-Fri 9 AM - 5 PM Eastern Time (UTC/GMT - 5 hrs)	Study Director
NCT00266695	Karl Beutner	Study Director
NCT00266786	Lincoln Bynum, MD	Study Chair
NCT00266825	Susan E Carlson, PhD	Principal Investigator
NCT00266825	John Colombo, PhD	Principal Investigator
NCT00266851	David L Hahn, MD, MS	Principal Investigator
NCT00266877	Puma	Study Director
NCT00267020	Call 1-877-CTLILLY (1-877-285-4559) or 1-317-615-4559 Mon - Fri 9 AM - 5 PM Eastern time (UTC/GMT - 5 hours, EST)	Study Director
NCT00267046	Saroj Vadhan-Raj, M.D.	Principal Investigator
NCT00267059	Alessandra Ferrajoli, MD	Principal Investigator
NCT00267085	Jorge E. Cortes, M.D.	Principal Investigator
NCT00267176	Bradkey Sakran, MD	Principal Investigator
NCT00267202	Novartis	Study Chair
NCT00267254	Pfizer CT.gov Call Center	Study Director
NCT00267293	Ian M Paul, MD	Principal Investigator
NCT00267358	William Polvino, MD	Study Director
NCT00267488	GSK Clinical Trials	Study Director
NCT00267670	Mary E Rinella, MD	Principal Investigator
NCT00267696	Larry J. Copeland, MD	Principal Investigator
NCT00267748	Pfizer CT.gov Call Center	Study Director
NCT00267930	Greg Beatch, PhD	Study Director
NCT00267956	Centocor, Inc. Clinical Trial	Study Director
NCT00267969	Centocor Research &amp; Development, Inc. Clinical Trial	Study Director
NCT00268307	Jay Traverse, MD	Principal Investigator
NCT00268333	Laurent Mineur, MD	Study Chair
NCT00268346	David J. Adelstein, MD	Study Chair
NCT00268359	James J. Vredenburgh, MD	Study Chair
NCT00268450	Andrew S. Kraft, MD	Study Chair
NCT00268489	Alex A. Adjei, MD, PhD	Study Chair
NCT00268593	Gavin Marx, MD	Study Chair
NCT00268593	Nick Pavlakis, MD	Study Chair
NCT00268827	Marsden K. Rawlings, MD	Principal Investigator
NCT00268853	Gabor Jurida, M.D.	Study Director
NCT00268879	Anthony Lembo	Principal Investigator
NCT00268892	Clinical Development Support	Study Director
NCT00268905	Eisai US Medical Services	Study Director
NCT00268918	Susana M. Campos, MD	Principal Investigator
NCT00268957	Medical Monitor	Study Director
NCT00269048	GSK Clinical Trials	Study Director
NCT00269204	Medical Monitor	Study Director
NCT00269217	Medical Monitor	Study Director
NCT00269477	Medical Monitor	Study Director
NCT00269516	Global Clinical Director Solvay	Study Director
NCT00269594	Jon E Grant, JD, MD	Principal Investigator
NCT00269620	Mitchell D Creinin, MD	Principal Investigator
NCT00270205	Benigno Rodriguez, MD	Study Chair
NCT00270218	Stephen De Rosa, MD	Study Chair
NCT00270218	Spyros A. Kalams, MD	Study Chair
NCT00270257	David Metzger, PhD	Study Chair
NCT00270296	Roger Shapiro, MD, MPH	Principal Investigator
NCT00270296	Claire Moffat, MD, MPH	Principal Investigator
NCT00270452	Gregory J Kato, M.D.	Principal Investigator
NCT00270478	John F Tisdale, M.D.	Principal Investigator
NCT00270634	Daniel Abramowicz, MD, PhD	Study Director
NCT00270634	Philip Belitsky, MD	Study Director
NCT00270634	Arthur Matas, MD	Study Director
NCT00270634	Mark Pescovitz, MD	Study Director
NCT00270634	A. Osama Gaber, MD	Study Director
NCT00270699	Anna Durbin, MD	Principal Investigator
NCT00270894	Lee S Schwartzberg, MD, FACP	Study Chair
NCT00270907	Marjorie Green, MD	Principal Investigator
NCT00271024	Andrea C King, PhD	Principal Investigator
NCT00271219	Hendree E. Jones, PhD	Principal Investigator
NCT00271596	Leigh J Beglinger, Ph.D.	Principal Investigator
NCT00271596	Jess G Fiedorowicz, M.D., Ph.D.	Principal Investigator
NCT00271596	Kevin Biglan, M.D., M.P.H.	Principal Investigator
NCT00271596	John Caviness, M.D.	Principal Investigator
NCT00271596	Ricardo Jorge, M.D.	Principal Investigator
NCT00271609	Teri Kreisl, M.D.	Principal Investigator
NCT00271817	Medical Monitor	Study Director
NCT00272038	Chadi Nabhan, MD	Principal Investigator
NCT00272311	Charles H Hennekens, MD, DrPH	Principal Investigator
NCT00272311	Wendy R Schneider, MSN, CCRC	Study Director
NCT00272337	Charles H Hennekens, MD, DrPH	Principal Investigator
NCT00272337	Wendy R Schneider, MSN, CCRC	Study Director
NCT00272350	Teri N Kreisl, M.D.	Principal Investigator
NCT00272649	Terry Chew, MD	Study Chair
NCT00272779	Bristol-Myers Squibb	Study Director
NCT00272805	James E. Udelson, M.D.	Principal Investigator
NCT00272935	Duramed Research Protocol Chair	Study Chair
NCT00273039	GSK Clinical Trials	Study Director
NCT00273052	GSK Clinical Trials	Study Director
NCT00273299	Novartis Pharmaceuticals	Study Director
NCT00273312	Novartis Pharmaceuticals	Study Director
NCT00273351	Kenneth L. Marek, MD	Principal Investigator
NCT00273429	William C. Stewart, MD	Study Director
NCT00273429	Jay Mulaney, MD	Principal Investigator
NCT00273429	Sriram Sonty, MD, FACS	Principal Investigator
NCT00273442	William C. Stewart, MD	Study Director
NCT00273442	Mark J. Weiss, MD	Principal Investigator
NCT00273442	Douglas G. Day, MD	Principal Investigator
NCT00273442	Sriram Sonty, MD, FACS	Principal Investigator
NCT00273442	J. Charles Henry, MD	Principal Investigator
NCT00273442	Elizabeth D. Sharpe, MD	Principal Investigator
NCT00273455	William C. Stewart, MD	Study Director
NCT00273455	Robert D. Williams, MD	Principal Investigator
NCT00273455	Robert H. Stewart, MD	Principal Investigator
NCT00273455	Elizabeth D. Sharpe, MD	Principal Investigator
NCT00273650	Robert L Hendren, D.O.	Principal Investigator
NCT00273689	Hengameh H Raissy, PharmD	Principal Investigator
NCT00273689	William Kelly, PharmD	Study Director
NCT00273702	Jon E Grant, MD, JD	Principal Investigator
NCT00273884	Steven Allen, MD	Principal Investigator
NCT00273910	Steven A Rosenberg, M.D.	Principal Investigator
NCT00274287	Chadi Nabhan, MD	Principal Investigator
NCT00274326	Daniel Ter-Minassian, MD	Study Chair
NCT00274352	Robert J Pariser, MD	Principal Investigator
NCT00274456	Jose Iglesias, MD	Study Chair
NCT00274690	GSK Clinical Trials	Study Director
NCT00274716	Medical Monitor	Study Director
NCT00274820	Mikkael A. Sekeres, MD, MS	Study Chair
NCT00274833	David M. Peereboom, MD	Study Chair
NCT00274846	Jeffrey Miller, MD	Study Chair
NCT00275002	Katherine Warren, MD	Study Chair
NCT00275028	Ursula Matulonis	Principal Investigator
NCT00275041	Timothy Hobday, MD	Study Chair
NCT00275080	Karen Yee	Principal Investigator
NCT00275093	John Sarantopoulos	Principal Investigator
NCT00275197	Pfizer CT.gov Call Center	Study Director
NCT00275236	UCB Clinical Trial Call Center	Study Director
NCT00275275	Rajesh Pahwa, MD	Principal Investigator
NCT00275431	Lance Leopold, MD	Study Director
NCT00275522	Mark D. Stegall, M.D.	Principal Investigator
NCT00275561	Jeffrey A. Alexander, M.D.	Principal Investigator
NCT00275613	John J. Dillon, M.D., M.S.	Principal Investigator
NCT00275704	Sandhya Pruthi, M.D.	Principal Investigator
NCT00276055	Claire Verschraegen, MD	Principal Investigator
NCT00276094	Shionogi Clinical Trials Administrator Clinical Support Help Line	Study Director
NCT00276250	Christian P Larsen, MD, D.Phil	Principal Investigator
NCT00276250	Thomas C Pearson, MD, D,Phil	Principal Investigator
NCT00276250	Sallie C Carpentier, RN, BSN	Study Director
NCT00276250	Nicole Turgeon, MD	Principal Investigator
NCT00276302	George D Demetri, MD, PhD	Principal Investigator
NCT00276406	Adil E. Bharucha, MBBS, MD	Principal Investigator
NCT00276458	Medical Monitor	Study Director
NCT00276484	Medical Monitor	Study Director
NCT00276549	Robert Dreicer, MD, FACP	Study Chair
NCT00276575	Herbert I. Hurwitz, MD	Principal Investigator
NCT00276588	Julie Brahmer, MD	Principal Investigator
NCT00276614	Matthew B. Rettig, MD	Study Chair
NCT00276744	Daniel A. Laheru, MD	Study Chair
NCT00276835	Timothy M. Kuzel, MD	Study Chair
NCT00276874	Craig R. Rush, PhD	Principal Investigator
NCT00276874	Paul E Glaser, MD, PhD	Principal Investigator
NCT00276874	Lon R. Hays, MD	Principal Investigator
NCT00276874	Joshua A. Lile, PhD	Principal Investigator
NCT00276965	Lori Altshuler, MD	Principal Investigator
NCT00277212	Bristol-Myers Squibb	Study Director
NCT00277238	Pfizer CT.gov Call Center	Study Director
NCT00277355	Merit E. Cudkowicz, MD	Principal Investigator
NCT00277472	Novartis 862-778-8300 Pharmaceuticals	Study Director
NCT00277498	Pfizer CT.gov Call Center	Study Director
NCT00277576	Henry LY Chan	Principal Investigator
NCT00277576	Nancy Leung	Principal Investigator
NCT00277576	Seng Gee Lim	Principal Investigator
NCT00277576	Wan Cheng Chow	Principal Investigator
NCT00277576	Sien-Sing Yang	Principal Investigator
NCT00277576	I Shyan-Sheen	Principal Investigator
NCT00277576	Satawat Thongsawat	Principal Investigator
NCT00277576	Tawesak Tandwandee	Principal Investigator
NCT00277576	Man Fung Yuen	Principal Investigator
NCT00277641	Susan L. McElroy, MD	Principal Investigator
NCT00277810	Medical Monitor	Study Director
NCT00277810	Trial Manager	Principal Investigator
NCT00277810	Trial Manager	Principal Investigator
NCT00277810	Trial Manager	Principal Investigator
NCT00277810	Trial Manager	Principal Investigator
NCT00277810	Trial Manager	Principal Investigator
NCT00277810	Trial Manager	Principal Investigator
NCT00277810	Trial Manager	Principal Investigator
NCT00277810	Trial Manager	Principal Investigator
NCT00277810	Trial Manager	Principal Investigator
NCT00277823	Medical Monitor	Study Director
NCT00277914	Boehringer Ingelheim	Study Chair
NCT00278161	Lode J. Swinnen, MD	Study Chair
NCT00278174	Ronald M. Bukowski, MD	Study Chair
NCT00278330	Steven Grant	Principal Investigator
NCT00278369	Timothy M. Kuzel, MD	Study Chair
NCT00278382	Meyer Heyman	Principal Investigator
NCT00278395	John Sarantopoulos	Principal Investigator
NCT00278525	Richard Burt, MD	Principal Investigator
NCT00278941	AstraZeneca Seroquel Medical Science Director, MD	Study Director
NCT00278954	Melvin Berger, MD	Principal Investigator
NCT00278967	Michael Goldstein, M.D.	Principal Investigator
NCT00278993	Asha Das	Study Director
NCT00279162	S Tyring, MD	Principal Investigator
NCT00279201	Call 1-877-CTLILLY (1-877-285-4559) or 1-317-615-4559 Mon-Fri 9 AM - 5 PM Eastern time (UTC/GMT - 5 hours, EST)	Study Director
NCT00279214	Call 1-877-CTLILLY (1-877-285-4559) or 1-317-651-4559 Mon - Fri 9 AM - 5 PM Eastern time (UTC/GMT - 5 hours, EST)	Study Director
NCT00279305	Carla Greenbaum, MD	Study Chair
NCT00279617	Paul Keck, MD	Principal Investigator
NCT00279708	Joseph R Fontana, M.D.	Principal Investigator
NCT00279890	Mark V. Dahl, M.D.	Principal Investigator
NCT00279903	Andrea J. Boon, M.D.	Principal Investigator
NCT00279916	Laura J. Orvidas, M.D.	Principal Investigator
NCT00280150	Thomas Stinchcombe, MD	Principal Investigator
NCT00280150	Thomas A. Stinchcombe, MD	Principal Investigator
NCT00280293	E. Sherwood Brown, M.D., Ph.D.	Principal Investigator
NCT00280423	GSK Clinical Trials	Study Director
NCT00280436	GSK Clinical Trials	Study Director
NCT00280540	Novartis Pharmaceuticals	Study Director
NCT00280566	Pfizer CT.gov Call Center	Study Director
NCT00280631	Gail Brown, MD	Study Director
NCT00280748	Thomas E. Stinchcombe, MD	Principal Investigator
NCT00280774	Sherwood Brown, Ph.D., M.D.	Principal Investigator
NCT00280826	Robert Nussenblatt, MD, MPH	Principal Investigator
NCT00280917	Michael H Silverman, MD	Study Director
NCT00280995	Medical Monitor	Study Director
NCT00281008	Medical Monitor	Study Director
NCT00281541	D. Buell, MD	Study Director
NCT00281554	Use Central Contact	Study Director
NCT00281580	Boehringer Ingelheim	Study Chair
NCT00281593	Boehringer Ingelheim	Study Chair
NCT00281606	Eric Daar, MD	Principal Investigator
NCT00281632	GSK Clinical Trials, MD	Study Director
NCT00281697	Leo Faoro, MD	Study Director
NCT00281840	Panayiotis Savvides, MD	Study Chair
NCT00281866	Michael K. Gibson, MD	Study Chair
NCT00281944	Lia Gore	Principal Investigator
NCT00281957	Kim Margolin	Principal Investigator
NCT00282048	Pfizer CT.gov Call Center	Study Director
NCT00282087	Martee L. Hensley, MD	Principal Investigator
NCT00282282	Vincent Ho, MD	Principal Investigator
NCT00282295	GSK Clinical Trials	Study Director
NCT00282308	Ariella Kelman, M.D.	Study Director
NCT00282347	Paul Brunetta, MD	Study Director
NCT00282464	Pfizer CT.gov Call Center	Study Director
NCT00282607	James L Yeager, RPh., Ph.D.	Study Director
NCT00282607	Harin Padma-Nathan, MD	Principal Investigator
NCT00282828	Mark H. Pollack, MD	Principal Investigator
NCT00282828	Murray B. Stein, MD, MPH	Principal Investigator
NCT00282828	Michael Van Ameringen, MD, FRCPC	Principal Investigator
NCT00282867	Karen Johnston, MD	Principal Investigator
NCT00282919	Pfizer CT.gov Call Center	Study Director
NCT00282984	Pfizer CT.gov Call Center	Study Director
NCT00282997	Pfizer CT.gov Call Center	Study Director
NCT00283075	Barry H Smith, MD, PhD	Principal Investigator
NCT00283101	Jonathan Drachman, MD	Study Director
NCT00283114	Eric Sievers, M.D.	Study Director
NCT00283244	Thomas E Stinchcombe, MD	Principal Investigator
NCT00283387	Carla G Monico, M.D.	Principal Investigator
NCT00283439	MD	Study Director
NCT00283504	MARIPAZ B MORALES, MD	Principal Investigator
NCT00283595	Anne Klibanski, MD	Principal Investigator
NCT00283686	Robert Schrier, M.D.	Study Chair
NCT00283686	Arlene Chapman, M.D.	Principal Investigator
NCT00283686	Ronald Perrone, M.D.	Principal Investigator
NCT00283686	Vicente Torres, M.D.	Principal Investigator
NCT00283686	Marva Moxey-Mims, M.D.	Study Director
NCT00283686	Charity G Moore, MS,PhD	Principal Investigator
NCT00283712	Russell P. Hall, MD	Study Chair
NCT00283712	E. William St. Clair, MD	Study Chair
NCT00283712	Garnett Kelsoe, DSci	Principal Investigator
NCT00283712	Victoria Werth, MD	Principal Investigator
NCT00283712	Janet Fairley, MD	Principal Investigator
NCT00283712	David Woodley, MD	Principal Investigator
NCT00283790	Phyllis Diener	Study Director
NCT00283816	Kathleen Hoeger, MD	Principal Investigator
NCT00284128	Clinical Sciences &amp; Operations	Study Director
NCT00284141	ICD CSD	Study Director
NCT00284154	David R. Spigel, MD	Principal Investigator
NCT00284180	Denise A Yardley, MD	Principal Investigator
NCT00284206	Andrew J Saxon	Principal Investigator
NCT00284427	Jeanne Drisko, MD	Principal Investigator
NCT00284505	Anthony H Guarino, MD	Principal Investigator
NCT00284739	Hyo-Chun Yoon, MD, PhD	Principal Investigator
NCT00284752	Tatjana Kolevska, MD	Principal Investigator
NCT00284804	Medarex Medical Monitor	Study Director
NCT00284908	Dennis A Ruff, MD	Principal Investigator
NCT00284908	Patrick Cohen, MD	Study Director
NCT00284908	Christof Kreutz, MD	Study Director
NCT00284986	Joanne Kurtzberg, M.D.	Principal Investigator
NCT00285012	Pfizer CT.gov Call Center	Study Director
NCT00285103	Betrand Coiffier, Prof. MD	Principal Investigator
NCT00285207	John A Burigo, MD	Principal Investigator
NCT00285207	Ramon Cestero, MD	Principal Investigator
NCT00285207	Paul M Fine, MD	Principal Investigator
NCT00285207	Keith A Aqua, MD	Principal Investigator
NCT00285207	Steven C Blank, MD	Principal Investigator
NCT00285207	Douglas G Young, MD	Principal Investigator
NCT00285207	Allan T Sawyer, MD	Principal Investigator
NCT00285207	Mark H Einstein, MD	Principal Investigator
NCT00285207	Robert M Spitz, MD	Principal Investigator
NCT00285207	Thomas A deHoop, MD	Principal Investigator
NCT00285207	Lance R Bruck, MD	Principal Investigator
NCT00285207	Warner K Huh, MD	Principal Investigator
NCT00285207	Giuseppe Del Priore, MD	Principal Investigator
NCT00285207	Michael A Gold, MD	Principal Investigator
NCT00285207	Richard S Guido, MD	Principal Investigator
NCT00285207	Philip E Young, MD	Principal Investigator
NCT00285207	Daron G. Ferris, MD	Principal Investigator
NCT00285207	Cynthia J Goldberg, MD	Principal Investigator
NCT00285207	Ana Eduardo, MD	Principal Investigator
NCT00285207	Phyllis Gee, MD	Principal Investigator
NCT00285207	Robert Pfeffer, MD	Principal Investigator
NCT00285207	Jonathan A Cosin, MD	Principal Investigator
NCT00285207	James A Williams, MD	Principal Investigator
NCT00285207	Vincent A Culotta, Jr, MD	Principal Investigator
NCT00285207	G. Michael Swor, MD	Principal Investigator
NCT00285207	Garn R Mabey, MD	Principal Investigator
NCT00285207	Martin Martino, MD	Principal Investigator
NCT00285207	Robert Klein, MD	Principal Investigator
NCT00285207	William J Mann, MD	Principal Investigator
NCT00285259	Richard T. Kenney, MD	Study Chair
NCT00285298	Robert M Perkins, MD	Study Director
[truncated: 22,136 more rows]

## Sheet: 3_Enrolling_LineByLine
NCT Number	Last name	Role
NCT00384124	Nicole M Owens, MD	Principal Investigator
NCT00554840	Elaine Weiner, M.D.	Principal Investigator
NCT00564538	Wendy Grant, MD	Principal Investigator
NCT00582504	Ronald Reisler, MD	Principal Investigator
NCT00584805	Robert Rivard, MD	Principal Investigator
NCT00623168	Laura M Cashin, DO	Principal Investigator
NCT00634972	Fabien G Eyal, M.D.	Principal Investigator
NCT00781612	Clinical Trials	Study Director
NCT00787826	Anthony Cardile, DO	Principal Investigator
NCT00798590	Dariush Elahi, PhD	Principal Investigator
NCT00817557	Milton M Hom, OD FAAO	Principal Investigator
NCT00826020	David F Mercer, MD, PhD	Principal Investigator
NCT00869232	Frits van Rhee, MD, PhD	Principal Investigator
NCT00869713	Ronald Reisler, MD	Principal Investigator
NCT00896012	Mark R Laftavi, MD, FACS	Principal Investigator
NCT00896012	Oleh G. Pankewycz, MD	Principal Investigator
NCT00900497	Dipnarine Maharaj, MD	Principal Investigator
NCT00923715	Rubina A Heptulla, MD	Principal Investigator
NCT00936663	James T. Lane, MD	Principal Investigator
NCT00938912	UCB Cares	Study Director
NCT00946309	Daniel W Lin, MD	Principal Investigator
NCT00950430	Val Lowe, M.D.	Principal Investigator
NCT00957190	Mark R Lesk, MSc,MD	Principal Investigator
NCT00972569	Dr Horng H Chen, MD	Principal Investigator
NCT00977028	Jeffrey A Klein, MD	Principal Investigator
NCT00992693	Elizabeth Rini, MD	Principal Investigator
NCT01066364	Rohit Loomba, MD, M.H.Sc	Principal Investigator
NCT01137773	Rainer Lenhardt, MD	Principal Investigator
NCT01156129	Laurel Williams, MSN,RN	Principal Investigator
NCT01216332	Natasha Halasa, M.D.	Principal Investigator
NCT01227226	Milton M Hom, OD FAAO	Principal Investigator
NCT01244737	Frederick D Grant, MD	Principal Investigator
NCT01247207	Edward O'Mara, MD	Study Director
NCT01248715	Julio A Ramirez, MD	Principal Investigator
NCT01280149	Paul A Greenberger, M.D.	Principal Investigator
NCT01288521	Sony Tuteja, PharmD	Principal Investigator
NCT01316770	Ilias G Alevizos, D.M.D.	Principal Investigator
NCT01337557	Milton M Hom, OD FAAO	Principal Investigator
NCT01364597	UCB Clinical Trial Call Center	Study Director
NCT01365195	Roya Yumul, MD PhD	Principal Investigator
NCT01365195	Roya Yumul, MD., PhD	Study Director
NCT01404754	Michael M Mithoefer, MD	Principal Investigator
NCT01412359	Jeffrey A Rudolph, MD	Principal Investigator
NCT01453127	Bradley Boeve, MD	Principal Investigator
NCT01454739	Medical Director	Study Director
NCT01474785	Naji Abumrad, MD	Principal Investigator
NCT01474785	Robyn Tamboli, PhD	Study Director
NCT01479348	Karen A Kurdziel, M.D.	Principal Investigator
NCT01483248	Charlie Xiang, Professor	Principal Investigator
NCT01514175	Khalid Athar, MD	Principal Investigator
NCT01543750	Joanna C Jen, MD PhD	Principal Investigator
NCT01571817	Andrew M Posselt, M.D., Ph.D.	Principal Investigator
NCT01576783	Sarah Keim	Principal Investigator
NCT01589523	Kenneth D.R. Setchell, Ph.D.	Principal Investigator
NCT01589523	James E. Heubi, M.D.	Principal Investigator
NCT01592695	Mark VanderWeg, PhD	Principal Investigator
NCT01601652	Ian J Griffin, MD	Principal Investigator
NCT01630889	Lona Poole, MD	Study Director
NCT01662297	Albert J Arias, MD, MS	Principal Investigator
NCT01662297	Elizabeth Ralevski, Ph.D.	Study Director
NCT01665547	Alaa M Ismail, M.D	Principal Investigator
NCT01678872	Peter Campochiaro, MD	Principal Investigator
NCT01705899	Amer Rajab, MD, PhD	Principal Investigator
NCT01708707	Gregory Martin, MD	Principal Investigator
NCT01720316	Deborah L Levy, PhD	Principal Investigator
NCT01728636	Louanne M Carabini, MD	Principal Investigator
NCT01731236	Stanley L Hazen, MD, PhD	Principal Investigator
NCT01732718	Kenneth I Ataga, MBBS	Principal Investigator
NCT01736059	Susanna s Park, MD PhD	Principal Investigator
NCT01736592	David Wilson, MD	Principal Investigator
NCT01736592	José-Alain Sahel, MD	Principal Investigator
NCT01759407	Nicole Elsey, MD	Principal Investigator
NCT01769001	Einat Almon, PhD	Study Director
NCT01770236	Prem Rabindra, MD	Principal Investigator
NCT01770236	Kym Culp, MD	Principal Investigator
NCT01770236	Korey Zellner, PA-C	Principal Investigator
NCT01781936	Glenn J. Jaffe, MD	Principal Investigator
NCT01794897	Vishwajit Nimgaonkar, MD, PhD	Principal Investigator
NCT01794897	Smita Deshpande, MD	Principal Investigator
NCT01800526	Barbara A Konkle, M.D.	Principal Investigator
NCT01804686	Janssen Research &amp; Development, LLC Clinical Trial	Study Director
NCT01808521	Barbara A Konkle, MD	Principal Investigator
NCT01843504	John J. Wilson, MD, MS	Principal Investigator
NCT01843504	Stephen J. Almasi, MD	Principal Investigator
NCT01843504	Kenneth S. Lee, MD	Principal Investigator
NCT01843751	Randall T Brown, MD, PhD	Principal Investigator
NCT01854125	Fangyu Wang, MD/PhD	Study Director
NCT01854125	Fangyu Wang, MD/PhD	Study Director
NCT01854359	Bibiana Bielekova, M.D.	Principal Investigator
NCT01854723	Elizabeth Stephens, MD	Principal Investigator
NCT01868373	David Y Graham, MD	Principal Investigator
NCT01894308	Shern L. Chew, M.D., Ph.D.	Principal Investigator
NCT01903486	Karthik Ravi, MD	Principal Investigator
NCT01905202	Prateek Sharma, M.D.	Principal Investigator
NCT01928082	Murray J Favus, MD	Principal Investigator
NCT01936480	Christopher Newton-Cheh, MD, MPH	Principal Investigator
NCT01949311	Clinical Trial Management	Study Director
NCT01964560	UCB Cares	Study Director
NCT01968798	Anne Murray, MD, MSc	Principal Investigator
NCT01968798	Richard Grimm, Jr., MD, PhD	Principal Investigator
NCT01979965	Raj Baljepally, MD	Principal Investigator
NCT01981720	Einat Almon, PhD	Study Chair
NCT02000388	Edward L Davis, M.D.	Principal Investigator
NCT02011750	Hader Mansour, MD	Principal Investigator
NCT02012465	Garry Tobin, MD	Principal Investigator
NCT02012465	Anna Roshal, MD	Principal Investigator
NCT02013037	Jignesh Patel, M.D., Ph.D.	Principal Investigator
NCT02013128	Jeff Sharman, MD	Study Chair
NCT02022644	Nicholas Butowski, MD	Principal Investigator
NCT02022644	Susan Chang, MD	Study Director
NCT02023866	Bruce H. Cohen, MD	Principal Investigator
NCT02025855	Thomas L Smoot, PharmD	Principal Investigator
NCT02029846	Hsin-Chieh Yeh, PhD	Principal Investigator
NCT02051062	Jason S Richardson, PhD	Study Chair
NCT02051062	Matt Cromie, MSc	Study Chair
NCT02051062	Christine Hall, PhD	Study Chair
NCT02051764	Chief Medical Officer	Study Chair
NCT02054052	Haihong Yang, MD	Principal Investigator
NCT02055157	Medical Director, MD	Study Director
NCT02065011	Richard Weleber, MD	Principal Investigator
NCT02065700	Pille Harrison, MD	Study Director
NCT02072668	Kenneth I Ataga, MBBS	Principal Investigator
NCT02079246	Email contact via H. Lundbeck A/S	Study Director
NCT02082717	Mavel Arinal, RN	Principal Investigator
NCT02090959	Robert Spiegel, M.D.	Study Director
NCT02108002	Prashant Chittiboina, M.D.	Principal Investigator
NCT02114697	John Oshinski, PhD	Principal Investigator
NCT02124265	Stephen M Milner, MBBS	Principal Investigator
NCT02124746	Caroline Roudet, PharmD	Study Director
NCT02126020	James Chodosh, MD, MPH	Principal Investigator
NCT02126020	Claes H Dohlman, MD, PhD	Study Chair
NCT02126020	Mona Harissi-Dagher, MD	Study Chair
NCT02126020	Marie-Claude Robert, MD	Study Chair
NCT02127892	Neena Kapoor, M.D.	Principal Investigator
NCT02137850	Global Clinical Registry (GCR, 1452)	Study Director
NCT02138331	Wael F Nassar, MD	Study Chair
NCT02138331	Mervat El Ansary, MD	Study Director
NCT02138331	Abdelnaser A Saad, MSc	Principal Investigator
NCT02138331	Mosaad A Hamid, MD	Principal Investigator
NCT02138331	Wael M Esa, MSc	Principal Investigator
NCT02138331	Sameh Shawki, MSc	Principal Investigator
NCT02138331	Marwa Mohammad, MSc	Principal Investigator
NCT02138331	Tamer Shehab, MRCP	Principal Investigator
NCT02138331	Heba A Ghaffar, MSc	Principal Investigator
NCT02141399	Sanjeev Pathak, MD	Study Director
NCT02149537	Bamidele O Tayo, PhD	Principal Investigator
NCT02149537	Victor R Gordeuk, MD	Principal Investigator
NCT02149537	Titilola S Akingbola, MBBS, FWACP	Principal Investigator
NCT02149537	Richard S Cooper, MD	Principal Investigator
NCT02149537	Lewis Hsu, MD	Principal Investigator
NCT02151903	Daniel Vlock, MD	Study Director
NCT02155309	Willliam J Becker, Phd	Principal Investigator
NCT02174848	Elliott Vichinsky, MD	Principal Investigator
NCT02174848	Thomas Klopstock, MD	Principal Investigator
NCT02174848	Nardo Nardocci, MD	Principal Investigator
NCT02174848	Patrick Chinnery, MD	Principal Investigator
NCT02178553	James D Hannon, MD	Principal Investigator
NCT02179255	David H Barad, MD	Principal Investigator
NCT02179255	Norbert Gleicher	Study Chair
NCT02182115	Susan E Kline, MD, MPH	Principal Investigator
NCT02185014	Alexandra Song, MD	Study Director
NCT02195895	Thomas J Schnitzer, MD, PhD	Principal Investigator
NCT02203799	Carla M Davis, MD	Principal Investigator
NCT02214160	Jason Cataldo, DO	Study Director
NCT02214615	Stephen Waxman, MD, PhD	Principal Investigator
NCT02219906	John A Oates, MD	Principal Investigator
NCT02225132	Courtney D Fitzhugh, M.D.	Principal Investigator
NCT02235844	Maurice HV Strickland, MD	Principal Investigator
NCT02239562	Christopher B. O'Brien, MD, AGAF, FRMCI	Principal Investigator
NCT02241460	Eugene Y Rhee, MD, MBA	Principal Investigator
NCT02243124	Rami Komrokji, MD	Principal Investigator
NCT02247973	Yang Xiao, MD	Study Chair
NCT02251938	Lanita Scott, MD	Study Director
NCT02262806	Rebecca J Brown, M.D.	Principal Investigator
NCT02262832	Rebecca J Brown, M.D.	Principal Investigator
NCT02265575	Brett D. Nelson, MD,MPH,DTM&amp;H	Principal Investigator
NCT02270606	Emma C Fields, MD	Principal Investigator
NCT02271698	Stuart A Grant, MB ChB	Principal Investigator
NCT02289365	Chih-Jen Huang, MD-PhD	Principal Investigator
NCT02289365	Cheng-Ying Shiau, MD	Principal Investigator
NCT02289365	Chin-Nan Chu, MD	Principal Investigator
NCT02290444	Ralph HB Benedict, PhD	Principal Investigator
NCT02297204	Rahul Khurana, MD	Principal Investigator
NCT02297256	Peter Passias, MD	Principal Investigator
NCT02299271	Brian Vaughan, MD	Principal Investigator
NCT02318433	Sanjeev Kakar, M.D., M.B.A	Principal Investigator
NCT02324725	Daniel Langleben, MD	Principal Investigator
NCT02347813	Alice P. Pentland, M.D.	Principal Investigator
NCT02352896	Bruce Cohen, MD	Principal Investigator
NCT02363439	Mark Cornfeld, MD, MPH	Study Director
NCT02368756	W. Lloyd Clark, MD	Principal Investigator
NCT02430363	Jann Lee, PhD	Principal Investigator
NCT02474472	Kristofer M Charlton-Ouw, MD	Principal Investigator
NCT02497911	Jaime L Baratta, MD	Principal Investigator
NCT02566577	Arshed Quyyumi, MD, FACC	Principal Investigator
NCT02575638	Zhisong Cao, Ph. D.	Principal Investigator
NCT02597712	Julian A Abrams, MD MS	Principal Investigator
NCT02604134	Arwa I Owais, BDS, MS	Principal Investigator
NCT02604134	MIchael Kanellis, DDS, MS	Principal Investigator
NCT02694653	Craig V. Towers, MD	Principal Investigator
NCT02702505	Carolyn A Kerins, DDS, PhD	Principal Investigator

## Sheet: 4_Recruiting_LineByLine
NCT Number	Last name	Role
NCT00006205	Bankole Johnson, DSc, MD, PhD	Principal Investigator
NCT00006205	Bankole Johnson, DSc, MD, PhD	Principal Investigator
NCT00006205	Nassima Ait-Daoud Tiouririne, MD	Sub-Investigator
NCT00006205	Bankole Johnson, DSc, MD, PhD	Principal Investigator
NCT00006205	Nassima Ait-Daoud Tiouririne, MD	Sub-Investigator
NCT00100165	Robert Freedman, MD	Principal Investigator
NCT00100165	Robert Freedman, MD	Principal Investigator
NCT00117728	Louise Kuhn, Ph.D.	Principal Investigator
NCT00121095	Michael J Morris, M.D.	Principal Investigator
NCT00121095	Michael J Morris, MD	Principal Investigator
NCT00124358	Ruth Finkelstein, ScD	Principal Investigator
NCT00124358	David Fiellin, MD	Principal Investigator
NCT00124358	Kevin Carmichael, MD	Principal Investigator
NCT00124358	Diana Sylvestre	Principal Investigator
NCT00124358	Paula Lum, MD, MPH	Principal Investigator
NCT00124358	Jacqueline Tulsky, MD	Principal Investigator
NCT00124358	Frederick Altice, MD	Principal Investigator
NCT00124358	Lynn Sullivan, MD	Principal Investigator
NCT00124358	Margaret Fischl, MD	Principal Investigator
NCT00124358	Lisa Metsch, PhD	Principal Investigator
NCT00124358	Jeffrey Watts, MD	Principal Investigator
NCT00124358	David Barker, MD	Sub-Investigator
NCT00124358	Greg Lucas, MD, PhD	Principal Investigator
NCT00124358	Yngveld Olsen, MD	Sub-Investigator
NCT00124358	William Ruby, DO	Sub-Investigator
NCT00124358	Jeffrey Hsu, MD	Sub-Investigator
NCT00124358	Jeanne Keruly, CRNP	Sub-Investigator
NCT00124358	Richard Moore, MD	Sub-Investigator
NCT00124358	Chinazo Cunningham, MD	Principal Investigator
NCT00124358	Nancy Sohler, PhD, MPH	Sub-Investigator
NCT00124358	P. Todd Korthuis, MD, MPH	Principal Investigator
NCT00124358	Dennis McCarty, PhD	Sub-Investigator
NCT00124358	Timothy Flanigan, MD	Principal Investigator
NCT00124358	Peter Friedman, MD, MPH	Sub-Investigator
NCT00132821	Gary Swan	Principal Investigator
NCT00133406	Richard L Guerrant, MD	Principal Investigator
NCT00148083	Steven M Silverstein, Ph.D.	Principal Investigator
NCT00148083	Steven M Silverstein, Ph.D.	Principal Investigator
NCT00148083	Adam Savitz, M.D., Ph.D.	Principal Investigator
NCT00183391	Jeffrey H. Newcorn, MD	Principal Investigator
NCT00183391	Mark A. Stein, PhD	Principal Investigator
NCT00183391	Elizabeth Charney, MD	Principal Investigator
NCT00183391	Edwin Cook, MD	Principal Investigator
NCT00183391	Mark A. Stein, PhD	Principal Investigator
NCT00183391	Jeffrey H. Newcorn, MD	Principal Investigator
NCT00186927	Elisabeth Adderson, MD	Principal Investigator
NCT00186927	Elisabeth Adderson, MD	Principal Investigator
NCT00199875	Robert Motzer, MD	Principal Investigator
NCT00199875	Neeta Pandit-Taskar, MD	Principal Investigator
NCT00199875	Joseph O'Donoghue, PhD	Principal Investigator
NCT00199875	Steve Larson, MD	Principal Investigator
NCT00199875	Steve Larson, MD	Principal Investigator
NCT00199875	Joseph O'Donoghue, PhD	Principal Investigator
NCT00199875	Neeta Pandit-Taskar, M D	Principal Investigator
NCT00199875	Robert Mozter, MD	Principal Investigator
NCT00202930	Jean M Tersak, M.D.	Principal Investigator
NCT00202930	Jean M Tersak, MD	Principal Investigator
NCT00218023	Joy Schmitz, PhD	Principal Investigator
NCT00218036	Joy M Schmitz, PhD	Principal Investigator
NCT00218036	F. Gerard Moeller, M.D.	Study Chair
NCT00218036	Richard Meisch, MD, PhD	Principal Investigator
NCT00219869	Alan Rapoport, MD	Principal Investigator
NCT00219869	Alan Rapoport, MD	Principal Investigator
NCT00219869	Stewart Tepper, MD	Sub-Investigator
NCT00219869	Fred Sheftell, MD	Sub-Investigator
NCT00219869	Marcelo Bigal, MD, PhD	Sub-Investigator
NCT00229918	Felipe de Alba, MD	Principal Investigator
NCT00229918	Anuradha Khanna, MD	Principal Investigator
NCT00229918	Felipe de Alba, MD	Principal Investigator
NCT00229918	Anuradha Khanna, MD	Principal Investigator
NCT00229918	John Galasso, MD, PhD	Sub-Investigator
NCT00230607	Medical Monitor	Study Director
NCT00244218	Reuben Matalon, MD, PhD	Principal Investigator
NCT00244218	Reuben Matalon, MD, PHD	Principal Investigator
NCT00244686	GSK Clinical Trials	Study Director
NCT00246727	Henry S Sacks, MD, Ph.D	Principal Investigator
NCT00246727	Henry S Sacks, MD, Ph.D	Principal Investigator
NCT00252174	John H Halpern, MD	Principal Investigator
NCT00252174	John H Halpern, MD	Principal Investigator
NCT00257738	Martin J. Edelman, MD	Principal Investigator
NCT00257738	Martin J. Edelman, MD	Principal Investigator
NCT00267865	Robert Yarchoan, M.D.	Principal Investigator
NCT00270517	Study Director	Study Director
NCT00271063	Gary Jacob, PhD	Study Director
NCT00271063	Samir Parekh, MD	Principal Investigator
NCT00271063	Meir Wetzler, MD	Principal Investigator
NCT00271063	Hagop Kantarjian, MD	Principal Investigator
NCT00273364	Richard Burt, MD	Principal Investigator
NCT00273364	Richard Burt, MD	Principal Investigator
NCT00274170	Alex Rosin, MD	Principal Investigator
NCT00275509	Robert A Montgomery, M.D., Ph.D.	Principal Investigator
NCT00275509	Christopher E Simpkins, M.D.	Study Director
NCT00275509	Robert A Montgomery, M.D., Ph.D.	Principal Investigator
NCT00275509	Andrea A Zachary, Ph.D.	Sub-Investigator
NCT00275509	Christopher E Simpkins, M.D.	Sub-Investigator
NCT00275509	Mary S. Leffell, Ph.D.	Sub-Investigator
NCT00275509	Mark Haas, M.D., Ph.D.	Sub-Investigator
NCT00275509	Daniel Warren, Ph.D.	Sub-Investigator
NCT00275509	Jayme Locke, M.D.	Sub-Investigator
NCT00281502	Sam Sigal, M.D.	Principal Investigator
NCT00281502	Sam Sigal, M.D.	Principal Investigator
NCT00281502	Brian P. Bosworth, M.D.	Sub-Investigator
NCT00281502	Ilan Weisberg, M.D.	Sub-Investigator
NCT00282620	Jeffrey Kluger, MD	Principal Investigator
NCT00282620	Jeffrey Kluger, MD	Principal Investigator
NCT00282620	Charles M White, PharmD	Sub-Investigator
NCT00282620	Nickole N Henyan, PharmD	Sub-Investigator
NCT00282620	Stephen D Sander, PharmD	Sub-Investigator
NCT00282620	Craig I Coleman, PharmD	Sub-Investigator
NCT00282620	Effie L Gillespie, PharmD	Sub-Investigator
NCT00282620	Christopher A Clyne, MD	Sub-Investigator
NCT00282620	William L Baker, PharmD	Sub-Investigator
NCT00282659	Charles M White, PharmD	Principal Investigator
NCT00282659	Charles M White, PharmD	Principal Investigator
NCT00282659	Jeffrey Kluger, MD	Sub-Investigator
NCT00282659	Nickole N Henyan, PharmD	Sub-Investigator
NCT00282659	Stephen D Sander, PharmD	Sub-Investigator
NCT00282659	Effie L Gillespie, PharmD	Sub-Investigator
NCT00282659	Christopher A Clyne, MD	Sub-Investigator
NCT00282659	Craig I Coleman, PharmD	Sub-Investigator
NCT00285935	Owen Wolkowitz, MD	Principal Investigator
NCT00290823	Theodore E. Nash, MD	Principal Investigator
NCT00290823	Hector H. Garcia, MD, PhD	Study Director
NCT00290823	Theodore E. Nash, MD	Principal Investigator
NCT00290823	Hector H. Garcia, MD, PhD	Principal Investigator
NCT00292955	Linda R. Duska, M.D.	Principal Investigator
NCT00293475	Edward Neuwelt	Principal Investigator
NCT00293475	Edward A. Neuwelt	Principal Investigator
NCT00293475	Robert E. Albright	Principal Investigator
NCT00293475	David M. Peereboom	Principal Investigator
NCT00293475	Edward A. Neuwelt	Principal Investigator
NCT00293475	Edward A. Neuwelt	Principal Investigator
NCT00300495	Malcolm M DeCamp, MD	Principal Investigator
NCT00300495	Malcolm M DeCamp, MD	Principal Investigator
NCT00302692	Randall Friese, MD	Principal Investigator
NCT00302692	Randall Friese, MD	Principal Investigator
NCT00303849	Edward Neuwelt	Principal Investigator
NCT00303849	Matthew A. Hunt	Principal Investigator
NCT00303849	Edward A. Neuwelt	Principal Investigator
NCT00304707	David Kalman, PhD	Principal Investigator
NCT00305682	Claudio G. Brunstein, MD, PhD	Principal Investigator
NCT00309842	Claudio G. Brunstein, MD, PhD	Study Chair
NCT00314821	Robert T Dunn, MD,PhD	Principal Investigator
NCT00319228	Paul J Pinciaro, PhD	Study Director
NCT00319878	Ronald Paquette, MD	Principal Investigator
NCT00319878	Alan List, MD	Principal Investigator
NCT00319878	Hussain Saba, MD	Principal Investigator
NCT00319878	Jaroslaw P. Maciejewski, MD	Principal Investigator
NCT00319878	Mikkael Sekeres, MD	Principal Investigator
NCT00319878	Thomas Loughran, MD	Principal Investigator
NCT00321555	Robert J Kreitman, M.D.	Principal Investigator
NCT00338377	Patrick Hwu, MD	Principal Investigator
NCT00338377	Patrick Hwu, MD	Principal Investigator
NCT00345345	Stefan F Cordes, M.D.	Principal Investigator
NCT00345865	Veronika Bachanova, MD	Principal Investigator
NCT00351611	Pfizer CT.gov Call Center	Study Director
NCT00352976	Margaret L MacMillan, M.D.	Principal Investigator
NCT00353379	Larry J. Siever, MD	Principal Investigator
NCT00356031	Yen-Lin Chen, MD	Principal Investigator
NCT00357331	Naina Sinha, M.D.	Principal Investigator
NCT00357331	Naina Sinha, M.D.	Principal Investigator
NCT00357565	Michael R. Verneris, MD	Principal Investigator
NCT00357565	Michael R. Verneris, M.D.	Principal Investigator
NCT00358657	Lauri Burroughs	Principal Investigator
NCT00358657	Haydar A. Frangoul	Principal Investigator
NCT00358657	Lauri M. Burroughs	Principal Investigator
NCT00363649	B. Douglas Smith, MD	Principal Investigator
NCT00373399	Margaret Haney, Ph.D.	Principal Investigator
NCT00373399	Efrat Aharonovich, Ph.D.	Principal Investigator
NCT00373399	Margaret Haney, Ph.D.	Principal Investigator
NCT00378638	Linnea I. Chap, MD	Principal Investigator
NCT00378638	Linnea I. Chap, M.D.	Principal Investigator
NCT00382265	Andrew C Meltzer, MD	Principal Investigator
NCT00382265	Andrew C Meltzer, MD	Principal Investigator
NCT00382265	Thomas Jarrett, MD	Sub-Investigator
NCT00382265	Judd Hollander, MD	Principal Investigator
NCT00382265	Allan B Wolfson, MD	Principal Investigator
NCT00390299	Evanthia Galanis	Principal Investigator
NCT00390299	Evanthia Galanis	Principal Investigator
NCT00391170	Sawa Ito, M.D.	Principal Investigator
NCT00392327	James Olson, MD, PhD	Principal Investigator
NCT00392327	Jeffrey S. Lobel	Principal Investigator
NCT00392327	Steven L. Halpern	Principal Investigator
NCT00392327	Peter G. Steinherz	Principal Investigator
NCT00392327	Janice F. Olson	Principal Investigator
NCT00392327	Nichole L. Bryant	Principal Investigator
NCT00392327	Carol Portwine	Principal Investigator
NCT00397735	Catalin S Buhimschi, MD	Principal Investigator
NCT00397813	Brenda Sandmaier	Principal Investigator
NCT00397813	Finn B. Petersen	Principal Investigator
NCT00397813	Thomas R. Chauncey	Principal Investigator
NCT00397813	Brenda M. Sandmaier	Principal Investigator
NCT00398034	David AN Siegel, M.D.	Principal Investigator
NCT00398034	David AN Siegel, M.D.	Principal Investigator
NCT00398034	Christopher Cardoza, M.D.	Sub-Investigator
NCT00398034	William Bauman, M.D.	Sub-Investigator
NCT00398034	Ann Spungen, Ed.D	Sub-Investigator
NCT00399243	Seymour Diamond, MD	Principal Investigator
NCT00399243	Fred G Freitag, DO	Sub-Investigator
NCT00399243	George Nissan, DO	Sub-Investigator
NCT00399243	Merle Diamond, MD	Sub-Investigator
NCT00399243	George Urban, MD	Sub-Investigator
NCT00399243	Betsy Pepper, MD	Sub-Investigator
NCT00405847	Sairam Parthasarathy, MD	Principal Investigator
NCT00405847	Sairam Parthasarathy, MD	Principal Investigator
NCT00406094	Jonathan A Bernstein, MD	Principal Investigator
NCT00406094	Jonathan A Bernstein, MD	Principal Investigator
NCT00408525	Harry E Gwirtsman, M.D.	Principal Investigator
NCT00408525	Harry E Gwirtsman, M.D.	Principal Investigator
NCT00413699	Pfizer CT.gov Call Center	Study Director
NCT00418262	Thomas M Lock, M.D.	Principal Investigator
NCT00418262	Thomas M Lock, M.D.	Principal Investigator
NCT00418262	Mark L Wolraich, M.D.	Sub-Investigator
NCT00418262	Laura J McGuinn, M.D.	Sub-Investigator
NCT00418457	Daniel I Sessler, MD	Principal Investigator
NCT00418457	Edith Fleischmann, MD	Principal Investigator
NCT00418457	Tanja A Meyer-Treschan, M.D.	Principal Investigator
NCT00418457	Donal J Buggy, MD	Principal Investigator
NCT00418821	Medical Monitor	Study Director
NCT00419731	Marc E Mooney, Ph.D.	Principal Investigator
NCT00419731	Marc E Mooney, Ph.D.	Principal Investigator
NCT00426517	Elizabeth M Kang, M.D.	Principal Investigator
NCT00432094	Brian McClune, DO	Principal Investigator
NCT00432549	Fred D Sheftell, M.D.	Principal Investigator
NCT00432549	Fred D Sheftell, M.D.	Principal Investigator
NCT00441818	Anas Younes, MD	Principal Investigator
NCT00441818	Craig Moskowitz, MD	Principal Investigator
NCT00441818	Craig Moskowitz, MD	Principal Investigator
NCT00441818	Anas Younes, MD	Principal Investigator
NCT00444964	Merlin G Butler, MD	Principal Investigator
NCT00444964	Merlin G Butler, MD	Principal Investigator
NCT00445354	Paul F Crawford, MD	Principal Investigator
NCT00445354	Paul F Crawford, MD	Principal Investigator
NCT00445354	Karen L Weis, PhD	Sub-Investigator
NCT00448071	Zeev Katzir, MD	Principal Investigator
NCT00448071	Shay Efrati, MD	Principal Investigator
NCT00448071	Zeev Katzir, MD	Principal Investigator
NCT00448071	Shay Efrati, MD	Principal Investigator
NCT00448825	Bankole Johnson, DSc, MD, PhD	Principal Investigator
NCT00448825	Bankole Johnson, DSc,MD,PhD	Principal Investigator
NCT00448825	Nassima Ait-Daoud, MD	Sub-Investigator
NCT00448825	Bankole Johnson, DSc,MD,PhD	Principal Investigator
NCT00448825	Nassima Ait-Daoud, MD	Sub-Investigator
NCT00450814	Angela Dispenzieri	Principal Investigator
NCT00450814	Angela Dispenzieri	Principal Investigator
NCT00451672	Kwan-Dun Wu, MD, PhD	Principal Investigator
NCT00451672	Vin-Cent Wu, MD	Study Director
NCT00455104	Michael L West, MD	Principal Investigator
NCT00455104	Aneal Khan, MD	Principal Investigator
NCT00455104	Sandra Sirrs, MD, FRCPC	Principal Investigator
NCT00455104	Michael L West, MD	Principal Investigator
NCT00455104	Mark R Iwanochko, MD, FRCPC	Principal Investigator
NCT00455104	Daniel Bichet, MD	Principal Investigator
NCT00461773	Gina Chung, M.D.	Principal Investigator
NCT00466128	Jolene S Seibel-Seamon, MD	Principal Investigator
NCT00466128	Jolene S Seibel-Seamon, MD	Principal Investigator
NCT00466531	Jae Park, MD	Principal Investigator
NCT00466843	Alan List, MD	Principal Investigator
NCT00466843	Ronald Paquette, MD	Principal Investigator
NCT00466843	Alan List, MD	Principal Investigator
NCT00466843	Jaroslaw P. Maciejewski, MD, PhD	Principal Investigator
NCT00466843	Thomas P. Loughran, Jr., MD	Principal Investigator
NCT00472186	Manali Amin, MD	Principal Investigator
NCT00472186	Manali Amin, MD	Principal Investigator
NCT00472329	Mark W Brunvand, MD	Principal Investigator
NCT00472329	Mark W Brunvand, MD	Principal Investigator
NCT00472329	Robert M Rifkin, MD	Sub-Investigator
NCT00472329	Jeffrey V Matous, MD	Sub-Investigator
NCT00472329	Peter A McSweeney, MD	Sub-Investigator
NCT00472329	Scott I Bearman, MD	Sub-Investigator
NCT00472329	Michael B Maris, MD	Sub-Investigator
NCT00479193	Charles Yowler, MD	Principal Investigator
NCT00479193	Charles Yowler, MD	Principal Investigator
NCT00479596	Leonard S Marks, M.D.	Principal Investigator
NCT00479596	Leonard S Marks, M.D.	Principal Investigator
NCT00484874	Richard L Wahl, MD	Principal Investigator
NCT00484874	Heather A Jacene, MD	Sub-Investigator
NCT00484874	Richard L Wahl, MD	Principal Investigator
NCT00484874	Richard Ambinder, MD, PhD	Sub-Investigator
NCT00484874	Yvette Kasamon, MD	Sub-Investigator
NCT00484874	George Sgouros, PhD	Sub-Investigator
NCT00484874	Eric Frey, PhD	Sub-Investigator
NCT00484874	Wayne Kasecamp, CNMT	Sub-Investigator
NCT00484874	Donna Serena, RN	Sub-Investigator
NCT00484874	Steven Piantadosi, MD, PhD	Sub-Investigator
NCT00489281	Javier Bolanos-Meade, MD	Study Chair
NCT00491790	Jeffrey L. Blumer, M.D., Ph.D.	Principal Investigator
NCT00491790	Jeffrey Blumer, Ph.D., M.D.	Principal Investigator
NCT00492778	Jonathan Feddock	Principal Investigator
NCT00492778	John K. Chan	Principal Investigator
NCT00492778	John K. Chan	Principal Investigator
NCT00492778	John K. Chan	Principal Investigator
NCT00492778	Alison K. Conlin	Principal Investigator
NCT00492778	John K. Chan	Principal Investigator
NCT00492778	John K. Chan	Principal Investigator
NCT00492778	John K. Chan	Principal Investigator
NCT00492778	John K. Chan	Principal Investigator
NCT00492778	Higinia R. Cardenes Perera	Principal Investigator
NCT00492778	Scott E. Lentz	Principal Investigator
NCT00492778	John K. Chan	Principal Investigator
NCT00492778	John K. Chan	Principal Investigator
NCT00492778	John K. Chan	Principal Investigator
NCT00492778	John K. Chan	Principal Investigator
NCT00492778	John K. Chan	Principal Investigator
NCT00492778	John K. Chan	Principal Investigator
NCT00492778	John K. Chan	Principal Investigator
NCT00492778	John K. Chan	Principal Investigator
NCT00492778	John K. Chan	Principal Investigator
NCT00492778	John K. Chan	Principal Investigator
NCT00492778	John K. Chan	Principal Investigator
NCT00492778	John K. Chan	Principal Investigator
NCT00492778	John K. Chan	Principal Investigator
NCT00492778	John K. Chan	Principal Investigator
NCT00492778	Philip J. Stella	Principal Investigator
NCT00492778	Mark E. Borowsky	Principal Investigator
NCT00492778	Mark E. Borowsky	Principal Investigator
NCT00492778	Mark E. Borowsky	Principal Investigator
NCT00492778	Mark E. Borowsky	Principal Investigator
NCT00492778	Mark E. Borowsky	Principal Investigator
NCT00492778	Mark E. Borowsky	Principal Investigator
NCT00492778	Mark E. Borowsky	Principal Investigator
NCT00492778	Mark E. Borowsky	Principal Investigator
NCT00492778	Mark E. Borowsky	Principal Investigator
NCT00492778	Mark E. Borowsky	Principal Investigator
NCT00492778	Mildred R. Chernofsky	Principal Investigator
NCT00492778	James V. Fiorica	Principal Investigator
NCT00492778	Guilherme Henrique C. Cantuaria	Principal Investigator
NCT00492778	Sharad A. Ghamande	Principal Investigator
NCT00492778	Andrew E. Green	Principal Investigator
NCT00492778	James J. Burke	Principal Investigator
NCT00492778	William E. Richards	Principal Investigator
NCT00492778	Philip J. Stella	Principal Investigator
NCT00492778	Benjamin T. Marchello	Principal Investigator
NCT00492778	Benjamin T. Marchello	Principal Investigator
NCT00492778	Benjamin T. Marchello	Principal Investigator
NCT00492778	Jessica Zhou	Principal Investigator
NCT00492778	Nguyet A. Le-Lindqwister	Principal Investigator
NCT00492778	LaToya J. Perry	Principal Investigator
NCT00492778	Sudarshan K. Sharma	Principal Investigator
NCT00492778	Matthew M. Harkenrider	Principal Investigator
NCT00492778	David M. Spector	Principal Investigator
NCT00492778	David M. Spector	Principal Investigator
NCT00492778	David M. Spector	Principal Investigator
NCT00492778	LaToya J. Perry	Principal Investigator
NCT00492778	Nonyem A. Onujiogu	Principal Investigator
NCT00492778	Nonyem A. Onujiogu	Principal Investigator
NCT00492778	David M. Spector	Principal Investigator
NCT00492778	David P. Bender	Principal Investigator
NCT00492778	Donald B. Wender	Principal Investigator
NCT00492778	Shaker R. Dakhil	Principal Investigator
NCT00492778	Shaker R. Dakhil	Principal Investigator
NCT00492778	Shaker R. Dakhil	Principal Investigator
NCT00492778	Shaker R. Dakhil	Principal Investigator
NCT00492778	Shaker R. Dakhil	Principal Investigator
NCT00492778	Shaker R. Dakhil	Principal Investigator
NCT00492778	Shaker R. Dakhil	Principal Investigator
NCT00492778	Shaker R. Dakhil	Principal Investigator
NCT00492778	Shaker R. Dakhil	Principal Investigator
NCT00492778	Shaker R. Dakhil	Principal Investigator
NCT00492778	Shaker R. Dakhil	Principal Investigator
NCT00492778	Shaker R. Dakhil	Principal Investigator
NCT00492778	Shaker R. Dakhil	Principal Investigator
NCT00492778	Shaker R. Dakhil	Principal Investigator
NCT00492778	Shaker R. Dakhil	Principal Investigator
NCT00492778	Shaker R. Dakhil	Principal Investigator
NCT00492778	Shaker R. Dakhil	Principal Investigator
NCT00492778	Shaker R. Dakhil	Principal Investigator
NCT00492778	Shaker R. Dakhil	Principal Investigator
NCT00492778	Jack B. Basil	Principal Investigator
NCT00492778	Frederick R. Ueland	Principal Investigator
NCT00492778	Giles Fort	Principal Investigator
NCT00492778	Christopher J. Darus	Principal Investigator
NCT00492778	Christopher J. Darus	Principal Investigator
NCT00492778	Philip J. Stella	Principal Investigator
NCT00492778	Philip J. Stella	Principal Investigator
NCT00492778	Robert T. Morris	Principal Investigator
NCT00492778	Philip J. Stella	Principal Investigator
NCT00492778	Robert T. Morris	Principal Investigator
NCT00492778	Philip J. Stella	Principal Investigator
NCT00492778	Philip J. Stella	Principal Investigator
NCT00492778	Philip J. Stella	Principal Investigator
NCT00492778	Raymond S. Lord	Principal Investigator
NCT00492778	Raymond S. Lord	Principal Investigator
NCT00492778	Raymond S. Lord	Principal Investigator
NCT00492778	Philip J. Stella	Principal Investigator
NCT00492778	Philip J. Stella	Principal Investigator
NCT00492778	Philip J. Stella	Principal Investigator
NCT00492778	Philip J. Stella	Principal Investigator
NCT00492778	Philip J. Stella	Principal Investigator
NCT00492778	James T. Thigpen	Principal Investigator
NCT00492778	James E. Clarkson	Principal Investigator
NCT00492778	Akm Mosharraf Hossain	Principal Investigator
NCT00492778	David G. Mutch	Principal Investigator
NCT00492778	Jay W. Carlson	Principal Investigator
NCT00492778	Jay W. Carlson	Principal Investigator
NCT00492778	Benjamin T. Marchello	Principal Investigator
NCT00492778	Benjamin T. Marchello	Principal Investigator
NCT00492778	Benjamin T. Marchello	Principal Investigator
NCT00492778	Benjamin T. Marchello	Principal Investigator
NCT00492778	Benjamin T. Marchello	Principal Investigator
NCT00492778	Benjamin T. Marchello	Principal Investigator
NCT00492778	Benjamin T. Marchello	Principal Investigator
NCT00492778	Benjamin T. Marchello	Principal Investigator
NCT00492778	Benjamin T. Marchello	Principal Investigator
NCT00492778	Benjamin T. Marchello	Principal Investigator
NCT00492778	Benjamin T. Marchello	Principal Investigator
NCT00492778	Benjamin T. Marchello	Principal Investigator
NCT00492778	Peter C. Morris	Principal Investigator
NCT00492778	John A. Ellerton	Principal Investigator
NCT00492778	John A. Ellerton	Principal Investigator
NCT00492778	John A. Ellerton	Principal Investigator
NCT00492778	John A. Ellerton	Principal Investigator
NCT00492778	John A. Ellerton	Principal Investigator
NCT00492778	John A. Ellerton	Principal Investigator
NCT00492778	John A. Ellerton	Principal Investigator
NCT00492778	John A. Ellerton	Principal Investigator
NCT00492778	John A. Ellerton	Principal Investigator
NCT00492778	John A. Ellerton	Principal Investigator
NCT00492778	John A. Ellerton	Principal Investigator
NCT00492778	John A. Ellerton	Principal Investigator
NCT00492778	John A. Ellerton	Principal Investigator
NCT00492778	John A. Ellerton	Principal Investigator
NCT00492778	John A. Ellerton	Principal Investigator
NCT00492778	John A. Ellerton	Principal Investigator
NCT00492778	John A. Ellerton	Principal Investigator
NCT00492778	John A. Ellerton	Principal Investigator
NCT00492778	John A. Ellerton	Principal Investigator
NCT00492778	John A. Ellerton	Principal Investigator
NCT00492778	John A. Ellerton	Principal Investigator
NCT00492778	John A. Ellerton	Principal Investigator
NCT00492778	John A. Ellerton	Principal Investigator
NCT00492778	John A. Ellerton	Principal Investigator
NCT00492778	Nicola M. Spirtos	Principal Investigator
NCT00492778	John A. Ellerton	Principal Investigator
NCT00492778	John O. Schorge	Principal Investigator
NCT00492778	Leslie R. DeMars	Principal Investigator
NCT00492778	Brian R. Knab	Principal Investigator
NCT00492778	David P. Warshal	Principal Investigator
NCT00492778	Randolph B. Deger	Principal Investigator
NCT00492778	Noah A. Goldman	Principal Investigator
NCT00492778	David F. Silver	Principal Investigator
NCT00492778	Noah A. Goldman	Principal Investigator
NCT00492778	David P. Warshal	Principal Investigator
NCT00492778	Randolph B. Deger	Principal Investigator
NCT00492778	Noah A. Goldman	Principal Investigator
NCT00492778	Teresa L. Rutledge	Principal Investigator
NCT00492778	Teresa L. Rutledge	Principal Investigator
NCT00492778	Ovadia Abulafia	Principal Investigator
NCT00492778	Veena S. John	Principal Investigator
NCT00492778	Veena S. John	Principal Investigator
NCT00492778	Veena S. John	Principal Investigator
NCT00492778	Joyce Varughese	Principal Investigator
NCT00492778	Mary J. Cunningham	Principal Investigator
NCT00492778	John M. McDonald	Principal Investigator
NCT00492778	James N. Atkins	Principal Investigator
NCT00492778	James N. Atkins	Principal Investigator
NCT00492778	James N. Atkins	Principal Investigator
NCT00492778	James N. Atkins	Principal Investigator
NCT00492778	James N. Atkins	Principal Investigator
NCT00492778	John P. Kuebler	Principal Investigator
NCT00492778	Michael P. Hopkins	Principal Investigator
NCT00492778	John P. Kuebler	Principal Investigator
NCT00492778	James C. Pavelka	Principal Investigator
NCT00492778	James C. Pavelka	Principal Investigator
NCT00492778	Thomas J. Reid	Principal Investigator
NCT00492778	Steven E. Waggoner	Principal Investigator
NCT00492778	David M. O'Malley	Principal Investigator
NCT00492778	John P. Kuebler	Principal Investigator
NCT00492778	John P. Kuebler	Principal Investigator
NCT00492778	John P. Kuebler	Principal Investigator
NCT00492778	John P. Kuebler	Principal Investigator
NCT00492778	John P. Kuebler	Principal Investigator
NCT00492778	John P. Kuebler	Principal Investigator
NCT00492778	John P. Kuebler	Principal Investigator
NCT00492778	John P. Kuebler	Principal Investigator
NCT00492778	John P. Kuebler	Principal Investigator
NCT00492778	John P. Kuebler	Principal Investigator
NCT00492778	John P. Kuebler	Principal Investigator
NCT00492778	John P. Kuebler	Principal Investigator
NCT00492778	John P. Kuebler	Principal Investigator
NCT00492778	John P. Kuebler	Principal Investigator
NCT00492778	Steven E. Waggoner	Principal Investigator
NCT00492778	John P. Kuebler	Principal Investigator
NCT00492778	John P. Kuebler	Principal Investigator
NCT00492778	John P. Kuebler	Principal Investigator
NCT00492778	John P. Kuebler	Principal Investigator
NCT00492778	John P. Kuebler	Principal Investigator
NCT00492778	John P. Kuebler	Principal Investigator
NCT00492778	John P. Kuebler	Principal Investigator
NCT00492778	Robert S. Mannel	Principal Investigator
NCT00492778	Robert S. Mannel	Principal Investigator
NCT00492778	Parviz Hanjani	Principal Investigator
NCT00492778	Alyson F. McIntosh	Principal Investigator
NCT00492778	Radhika P. Gogoi	Principal Investigator
NCT00492778	Mark A. Miller	Principal Investigator
NCT00492778	Mark A. Miller	Principal Investigator
NCT00492778	Bernice L. Robinson-Bennett	Principal Investigator
NCT00492778	Radhika P. Gogoi	Principal Investigator
NCT00492778	Paul B. Gilman	Principal Investigator
NCT00492778	Mark A. Miller	Principal Investigator
NCT00492778	Mark A. Miller	Principal Investigator
NCT00492778	Jeffrey W. Elder	Principal Investigator
NCT00492778	Jeffrey W. Elder	Principal Investigator
NCT00492778	Jeffrey W. Elder	Principal Investigator
NCT00492778	Jeffrey W. Elder	Principal Investigator
NCT00492778	Jeffrey W. Elder	Principal Investigator
NCT00492778	Jeffrey W. Elder	Principal Investigator
NCT00492778	Jeffrey W. Elder	Principal Investigator
NCT00492778	Jeffrey W. Elder	Principal Investigator
NCT00492778	Jeffrey W. Elder	Principal Investigator
NCT00492778	Luis A. Rojas-Espaillat	Principal Investigator
NCT00492778	Larry C. Kilgore	Principal Investigator
NCT00492778	Ahmad Raza	Principal Investigator
NCT00492778	Ahmad Raza	Principal Investigator
NCT00492778	Daniel E. Lehane	Principal Investigator
NCT00492778	Daniel E. Lehane	Principal Investigator
NCT00492778	Andrew P. Soisson	Principal Investigator
NCT00492778	Cheung Wong	Principal Investigator
NCT00492778	Jonathan E. Tammela	Principal Investigator
NCT00492778	Jonathan E. Tammela	Principal Investigator
NCT00492778	Jonathan E. Tammela	Principal Investigator
NCT00492778	Jonathan E. Tammela	Principal Investigator
NCT00492778	Alcee J. Jumonville	Principal Investigator
NCT00492778	David M. Kushner	Principal Investigator
NCT00492778	Ali Mahdavi	Principal Investigator
NCT00492778	Ali Mahdavi	Principal Investigator
NCT00492778	Benjamin T. Marchello	Principal Investigator
NCT00492778	Benjamin T. Marchello	Principal Investigator
NCT00492778	Benjamin T. Marchello	Principal Investigator
NCT00494572	Jeffrey Blumer, MD	Principal Investigator
NCT00494572	Jeffrey Blumer, Ph.D., M.D.	Principal Investigator
NCT00497926	Joseph Leventhal, MD	Principal Investigator
NCT00497926	Kadiyala Ravindra, MD	Principal Investigator
NCT00497926	Joseph Leventhal, M.D.	Principal Investigator
NCT00501826	Farhad Ravandi-Kashani, M.D.	Principal Investigator
NCT00504413	Rheem A Totah, PhD	Principal Investigator
NCT00504413	Rheem A Totah, PhD	Principal Investigator
NCT00504413	Danny Shen, PhD	Principal Investigator
NCT00504413	Gregory Terman, MD	Sub-Investigator
NCT00504413	Kristin K Patton, MD	Sub-Investigator
NCT00504413	Jean C Dinh, BS	Sub-Investigator
NCT00504972	John P Leonard, MD	Principal Investigator
NCT00504972	Peter Martin, MD	Sub-Investigator
NCT00504972	Stanley Goldsmith, MD	Sub-Investigator
NCT00504972	Shankar Vallabhajosula, PhD	Sub-Investigator
NCT00504972	Richard Furman, MD	Sub-Investigator
NCT00504972	Jia Ruan, MD, PhD	Sub-Investigator
NCT00504972	John P Leonard, MD	Principal Investigator
NCT00506259	William A Gahl, M.D.	Principal Investigator
NCT00506532	MordechaI R Kramer, Prof	Principal Investigator
NCT00506532	Anat Amital, Dr	Sub-Investigator
NCT00506532	David Shitrit, Dr	Sub-Investigator
NCT00506532	Ilana Bakal	Sub-Investigator
NCT00506532	Yael Raviv, Dr	Sub-Investigator
NCT00513552	Timothy R Koch, MD	Principal Investigator
NCT00513552	Timothy R Koch, MD	Principal Investigator
NCT00515411	Yelena Janjigian, MD	Principal Investigator
NCT00515411	Yelena Janjigian, MD	Principal Investigator
NCT00516464	Gregory M Fox, MD	Principal Investigator
NCT00516464	Gregory M Fox, MD	Principal Investigator
NCT00524173	Marc G Ghany, M.D.	Principal Investigator
NCT00530686	Nicholas Onaca, MD	Principal Investigator
NCT00530686	Nicholas Onaca, MD	Principal Investigator
NCT00538668	Scott Tagawa, M.D.	Principal Investigator
NCT00538668	David Nanus, M.D.	Sub-Investigator
NCT00538668	Scott Tagawa, M.D.	Principal Investigator
NCT00538668	Shankar Vallabhajosula, Ph.D.	Sub-Investigator
NCT00538668	Stanley Goldsmith, M.D.	Sub-Investigator
NCT00538733	Ruben Niesvizky, MD	Principal Investigator
NCT00539071	Herbert Meltzer, M.D.	Principal Investigator
NCT00539071	Herbert Meltzer, M.D.	Principal Investigator
NCT00542191	Paul Walker, MD	Principal Investigator
NCT00545532	Clinical Trials	Study Director
NCT00546455	Mario Chojkier, M.D.	Principal Investigator
NCT00546936	Kevin J. Blinder, MD	Principal Investigator
NCT00546936	Thomas Ciulla, MD	Principal Investigator
NCT00546936	Kevin J Blinder, MD	Principal Investigator
NCT00549848	Sima Jeha, MD	Principal Investigator
NCT00549848	Sima Jeha, MD	Principal Investigator
NCT00552461	Mani S Kavuru, MD	Principal Investigator
NCT00552461	Mani S Kavuru, MD	Principal Investigator
NCT00553592	Mark Roffman, PhD	Study Director
NCT00553592	Jesse Wallace, MD	Principal Investigator
NCT00553618	Jason A Chesney, MD	Principal Investigator
NCT00553618	Kelly M McMasters, MD	Sub-Investigator
NCT00553618	Donald M Miller, MD	Sub-Investigator
NCT00555555	Paul J Pinciaro, PhD	Study Director
NCT00565851	Robert Coleman	Principal Investigator
NCT00565851	Paul G. Montgomery	Principal Investigator
NCT00565851	Paul G. Montgomery	Principal Investigator
NCT00565851	Paul G. Montgomery	Principal Investigator
NCT00565851	Paul G. Montgomery	Principal Investigator
NCT00565851	Paul G. Montgomery	Principal Investigator
NCT00565851	Paul G. Montgomery	Principal Investigator
NCT00565851	Paul G. Montgomery	Principal Investigator
NCT00565851	Paul G. Montgomery	Principal Investigator
NCT00565851	Mehmet S. Copur	Principal Investigator
NCT00565851	Paul G. Montgomery	Principal Investigator
NCT00565851	Scott E. Lentz	Principal Investigator
NCT00565851	Jonathan S. Berek	Principal Investigator
NCT00565851	Lee-May Chen	Principal Investigator
NCT00565851	Keren Sturtz	Principal Investigator
NCT00565851	Keren Sturtz	Principal Investigator
NCT00565851	Saketh R. Guntupalli	Principal Investigator
NCT00565851	Keren Sturtz	Principal Investigator
NCT00565851	Keren Sturtz	Principal Investigator
NCT00565851	Keren Sturtz	Principal Investigator
NCT00565851	Keren Sturtz	Principal Investigator
NCT00565851	Keren Sturtz	Principal Investigator
NCT00565851	Keren Sturtz	Principal Investigator
NCT00565851	Keren Sturtz	Principal Investigator
NCT00565851	Keren Sturtz	Principal Investigator
NCT00565851	Keren Sturtz	Principal Investigator
NCT00565851	Keren Sturtz	Principal Investigator
NCT00565851	Keren Sturtz	Principal Investigator
NCT00565851	Keren Sturtz	Principal Investigator
NCT00565851	Keren Sturtz	Principal Investigator
NCT00565851	Keren Sturtz	Principal Investigator
NCT00565851	Keren Sturtz	Principal Investigator
NCT00565851	Keren Sturtz	Principal Investigator
NCT00565851	Keren Sturtz	Principal Investigator
NCT00565851	Keren Sturtz	Principal Investigator
NCT00565851	Keren Sturtz	Principal Investigator
NCT00565851	Keren Sturtz	Principal Investigator
NCT00565851	Keren Sturtz	Principal Investigator
NCT00565851	Keren Sturtz	Principal Investigator
NCT00565851	Keren Sturtz	Principal Investigator
NCT00565851	Keren Sturtz	Principal Investigator
NCT00565851	Keren Sturtz	Principal Investigator
NCT00565851	Keren Sturtz	Principal Investigator
NCT00565851	Keren Sturtz	Principal Investigator
NCT00565851	Keren Sturtz	Principal Investigator
NCT00565851	Keren Sturtz	Principal Investigator
NCT00565851	Keren Sturtz	Principal Investigator
NCT00565851	Keren Sturtz	Principal Investigator
NCT00565851	Keren Sturtz	Principal Investigator
NCT00565851	Keren Sturtz	Principal Investigator
NCT00565851	Keren Sturtz	Principal Investigator
NCT00565851	Paul E. Berard	Principal Investigator
NCT00565851	Amy K. Brown	Principal Investigator
NCT00565851	Susanna Hong	Principal Investigator
NCT00565851	Amy K. Brown	Principal Investigator
NCT00565851	Mark E. Borowsky	Principal Investigator
NCT00565851	Mark E. Borowsky	Principal Investigator
NCT00565851	Mark E. Borowsky	Principal Investigator
NCT00565851	Mark E. Borowsky	Principal Investigator
NCT00565851	Mark E. Borowsky	Principal Investigator
NCT00565851	Mark E. Borowsky	Principal Investigator
NCT00565851	Mark E. Borowsky	Principal Investigator
NCT00565851	Mark E. Borowsky	Principal Investigator
NCT00565851	Mark E. Borowsky	Principal Investigator
NCT00565851	Edward C. Grendys	Principal Investigator
NCT00565851	Sharad A. Ghamande	Principal Investigator
NCT00565851	Andrew E. Green	Principal Investigator
NCT00565851	William E. Richards	Principal Investigator
NCT00565851	Philip J. Stella	Principal Investigator
NCT00565851	Paul G. Montgomery	Principal Investigator
NCT00565851	Paul G. Montgomery	Principal Investigator
NCT00565851	Paul G. Montgomery	Principal Investigator
NCT00565851	Paul G. Montgomery	Principal Investigator
NCT00565851	Paul G. Montgomery	Principal Investigator
NCT00565851	James L. Wade	Principal Investigator
NCT00565851	James L. Wade	Principal Investigator
NCT00565851	James L. Wade	Principal Investigator
NCT00565851	James L. Wade	Principal Investigator
NCT00565851	James L. Wade	Principal Investigator
NCT00565851	James L. Wade	Principal Investigator
NCT00565851	Emily Berry	Principal Investigator
NCT00565851	James L. Wade	Principal Investigator
NCT00565851	James L. Wade	Principal Investigator
NCT00565851	James L. Wade	Principal Investigator
NCT00565851	James L. Wade	Principal Investigator
NCT00565851	James L. Wade	Principal Investigator
NCT00565851	James L. Wade	Principal Investigator
NCT00565851	James L. Wade	Principal Investigator
NCT00565851	James L. Wade	Principal Investigator
NCT00565851	Jay W. Carlson	Principal Investigator
NCT00565851	James L. Wade	Principal Investigator
NCT00565851	James L. Wade	Principal Investigator
NCT00565851	James L. Wade	Principal Investigator
NCT00565851	James L. Wade	Principal Investigator
NCT00565851	James L. Wade	Principal Investigator
NCT00565851	James L. Wade	Principal Investigator
NCT00565851	James L. Wade	Principal Investigator
NCT00565851	James L. Wade	Principal Investigator
NCT00565851	James L. Wade	Principal Investigator
NCT00565851	James L. Wade	Principal Investigator
NCT00565851	James L. Wade	Principal Investigator
NCT00565851	James L. Wade	Principal Investigator
NCT00565851	James L. Wade	Principal Investigator
NCT00565851	James L. Wade	Principal Investigator
NCT00565851	James L. Wade	Principal Investigator
NCT00565851	Mohamad Kassar	Principal Investigator
NCT00565851	Howard M. Gross	Principal Investigator
NCT00565851	Michael Rodriguez	Principal Investigator
NCT00565851	Mehmet S. Copur	Principal Investigator
NCT00565851	Mehmet S. Copur	Principal Investigator
NCT00565851	Mehmet S. Copur	Principal Investigator
NCT00565851	Mehmet S. Copur	Principal Investigator
NCT00565851	Robert J. Behrens	Principal Investigator
NCT00565851	Robert J. Behrens	Principal Investigator
NCT00565851	Robert J. Behrens	Principal Investigator
NCT00565851	Mehmet S. Copur	Principal Investigator
NCT00565851	Mehmet S. Copur	Principal Investigator
NCT00565851	Robert J. Behrens	Principal Investigator
NCT00565851	David P. Bender	Principal Investigator
NCT00565851	Robert J. Behrens	Principal Investigator
NCT00565851	Mehmet S. Copur	Principal Investigator
NCT00565851	Shaker R. Dakhil	Principal Investigator
NCT00565851	Shaker R. Dakhil	Principal Investigator
NCT00565851	Shaker R. Dakhil	Principal Investigator
NCT00565851	Shaker R. Dakhil	Principal Investigator
NCT00565851	Shaker R. Dakhil	Principal Investigator
NCT00565851	Robert L. Coleman	Principal Investigator
NCT00565851	Shaker R. Dakhil	Principal Investigator
NCT00565851	Shaker R. Dakhil	Principal Investigator
NCT00565851	Rakesh Gaur	Principal Investigator
NCT00565851	Rakesh Gaur	Principal Investigator
NCT00565851	Shaker R. Dakhil	Principal Investigator
NCT00565851	Shaker R. Dakhil	Principal Investigator
NCT00565851	Rakesh Gaur	Principal Investigator
NCT00565851	Rakesh Gaur	Principal Investigator
NCT00565851	Shaker R. Dakhil	Principal Investigator
NCT00565851	Shaker R. Dakhil	Principal Investigator
NCT00565851	Shaker R. Dakhil	Principal Investigator
NCT00565851	Shaker R. Dakhil	Principal Investigator
NCT00565851	Shaker R. Dakhil	Principal Investigator
NCT00565851	Shaker R. Dakhil	Principal Investigator
NCT00565851	Shaker R. Dakhil	Principal Investigator
NCT00565851	Shaker R. Dakhil	Principal Investigator
NCT00565851	Shaker R. Dakhil	Principal Investigator
NCT00565851	Mehmet S. Copur	Principal Investigator
NCT00565851	Mehmet S. Copur	Principal Investigator
NCT00565851	Mehmet S. Copur	Principal Investigator
NCT00565851	Mehmet S. Copur	Principal Investigator
NCT00565851	Mehmet S. Copur	Principal Investigator
NCT00565851	Mehmet S. Copur	Principal Investigator
NCT00565851	Mehmet S. Copur	Principal Investigator
NCT00565851	Mehmet S. Copur	Principal Investigator
NCT00565851	William R. Robinson	Principal Investigator
NCT00565851	William R. Robinson	Principal Investigator
NCT00565851	Giles Fort	Principal Investigator
NCT00565851	William R. Robinson	Principal Investigator
NCT00565851	Fouad M. Abbas	Principal Investigator
NCT00565851	William J. Lowery	Principal Investigator
NCT00565851	Fouad M. Abbas	Principal Investigator
NCT00565851	Philip J. Stella	Principal Investigator
NCT00565851	Carolyn M. Johnston	Principal Investigator
NCT00565851	Kathleen J. Yost	Principal Investigator
NCT00565851	Philip J. Stella	Principal Investigator
NCT00565851	Robert T. Morris	Principal Investigator
NCT00565851	Philip J. Stella	Principal Investigator
NCT00565851	Jonathan E. Tammela	Principal Investigator
NCT00565851	Robert T. Morris	Principal Investigator
NCT00565851	Philip J. Stella	Principal Investigator
NCT00565851	Philip J. Stella	Principal Investigator
NCT00565851	Kathleen J. Yost	Principal Investigator
NCT00565851	Kathleen J. Yost	Principal Investigator
NCT00565851	Jonathan E. Tammela	Principal Investigator
NCT00565851	Philip J. Stella	Principal Investigator
NCT00565851	Kathleen J. Yost	Principal Investigator
NCT00565851	Kathleen J. Yost	Principal Investigator
NCT00565851	Kathleen J. Yost	Principal Investigator
NCT00565851	Philip J. Stella	Principal Investigator
NCT00565851	Philip J. Stella	Principal Investigator
NCT00565851	Kathleen J. Yost	Principal Investigator
NCT00565851	Kathleen J. Yost	Principal Investigator
NCT00565851	Philip J. Stella	Principal Investigator
NCT00565851	Kathleen J. Yost	Principal Investigator
NCT00565851	Philip J. Stella	Principal Investigator
NCT00565851	Kathleen J. Yost	Principal Investigator
NCT00565851	Kathleen J. Yost	Principal Investigator
NCT00565851	Philip J. Stella	Principal Investigator
NCT00565851	Kathleen J. Yost	Principal Investigator
NCT00565851	Maria C. Bell	Principal Investigator
NCT00565851	Rachel E. Lerner	Principal Investigator
NCT00565851	Rachel E. Lerner	Principal Investigator
NCT00565851	Rachel E. Lerner	Principal Investigator
NCT00565851	Rachel E. Lerner	Principal Investigator
NCT00565851	Rachel E. Lerner	Principal Investigator
NCT00565851	Rachel E. Lerner	Principal Investigator
NCT00565851	Rachel E. Lerner	Principal Investigator
NCT00565851	Rachel E. Lerner	Principal Investigator
NCT00565851	Rachel E. Lerner	Principal Investigator
NCT00565851	Rachel E. Lerner	Principal Investigator
NCT00565851	Rachel E. Lerner	Principal Investigator
NCT00565851	Rachel E. Lerner	Principal Investigator
NCT00565851	Rachel E. Lerner	Principal Investigator
NCT00565851	Rachel E. Lerner	Principal Investigator
NCT00565851	Rachel E. Lerner	Principal Investigator
NCT00565851	Rachel E. Lerner	Principal Investigator
NCT00565851	Rachel E. Lerner	Principal Investigator
NCT00565851	James T. Thigpen	Principal Investigator
NCT00565851	Jay W. Carlson	Principal Investigator
NCT00565851	James L. Wade	Principal Investigator
NCT00565851	Jay W. Carlson	Principal Investigator
NCT00565851	James L. Wade	Principal Investigator
NCT00565851	James L. Wade	Principal Investigator
NCT00565851	Rakesh Gaur	Principal Investigator
NCT00565851	James L. Wade	Principal Investigator
NCT00565851	Jay W. Carlson	Principal Investigator
NCT00565851	Jay W. Carlson	Principal Investigator
NCT00565851	Rakesh Gaur	Principal Investigator
NCT00565851	Rakesh Gaur	Principal Investigator
NCT00565851	Rakesh Gaur	Principal Investigator
NCT00565851	Rakesh Gaur	Principal Investigator
NCT00565851	Rakesh Gaur	Principal Investigator
NCT00565851	Jay W. Carlson	Principal Investigator
NCT00565851	Jay W. Carlson	Principal Investigator
NCT00565851	Rakesh Gaur	Principal Investigator
NCT00565851	Jay W. Carlson	Principal Investigator
NCT00565851	James L. Wade	Principal Investigator
NCT00565851	Jay W. Carlson	Principal Investigator
NCT00565851	James L. Wade	Principal Investigator
NCT00565851	Jay W. Carlson	Principal Investigator
NCT00565851	Jay W. Carlson	Principal Investigator
NCT00565851	James L. Wade	Principal Investigator
NCT00565851	James L. Wade	Principal Investigator
NCT00565851	Mehmet S. Copur	Principal Investigator
NCT00565851	Mehmet S. Copur	Principal Investigator
NCT00565851	Mehmet S. Copur	Principal Investigator
NCT00565851	Mehmet S. Copur	Principal Investigator
NCT00565851	Mehmet S. Copur	Principal Investigator
NCT00565851	Mehmet S. Copur	Principal Investigator
NCT00565851	Mehmet S. Copur	Principal Investigator
NCT00565851	Mehmet S. Copur	Principal Investigator
NCT00565851	Mehmet S. Copur	Principal Investigator
NCT00565851	Nicola M. Spirtos	Principal Investigator
NCT00565851	Peter C. Lim	Principal Investigator
NCT00565851	Peter C. Lim	Principal Investigator
NCT00565851	Donna T. McNamara	Principal Investigator
NCT00565851	Daniel H. Tobias	Principal Investigator
NCT00565851	Randolph B. Deger	Principal Investigator
NCT00565851	Karim S. ElSahwi	Principal Investigator
NCT00565851	Lorna Rodriguez-Rodriguez	Principal Investigator
NCT00565851	David F. Silver	Principal Investigator
NCT00565851	Daniel H. Tobias	Principal Investigator
NCT00565851	Randolph B. Deger	Principal Investigator
NCT00565851	Carolyn Y. Muller	Principal Investigator
NCT00565851	Carolyn Y. Muller	Principal Investigator
NCT00565851	Carolyn Y. Muller	Principal Investigator
NCT00565851	Daniel C. Kredentser	Principal Investigator
NCT00565851	Ovadia Abulafia	Principal Investigator
NCT00565851	Katherine Economos	Principal Investigator
NCT00565851	Veena S. John	Principal Investigator
NCT00565851	Veena S. John	Principal Investigator
NCT00565851	Veena S. John	Principal Investigator
NCT00565851	Jamal Rahaman	Principal Investigator
NCT00565851	Richard G. Moore	Principal Investigator
NCT00565851	Michael L. Pearl	Principal Investigator
NCT00565851	Mary J. Cunningham	Principal Investigator
NCT00565851	Raymond Thertulien	Principal Investigator
NCT00565851	Robert V. Higgins	Principal Investigator
NCT00565851	John M. McDonald	Principal Investigator
NCT00565851	John M. McDonald	Principal Investigator
NCT00565851	John M. McDonald	Principal Investigator
NCT00565851	Angeles A. Secord	Principal Investigator
NCT00565851	Raymond Thertulien	Principal Investigator
NCT00565851	John M. McDonald	Principal Investigator
NCT00565851	John M. McDonald	Principal Investigator
NCT00565851	John M. McDonald	Principal Investigator
NCT00565851	John M. McDonald	Principal Investigator
NCT00565851	John M. McDonald	Principal Investigator
NCT00565851	Michael J. Sundborg	Principal Investigator
NCT00565851	Angeles A. Secord	Principal Investigator
NCT00565851	Maria C. Bell	Principal Investigator
NCT00565851	Maria C. Bell	Principal Investigator
NCT00565851	Maria C. Bell	Principal Investigator
NCT00565851	Maria C. Bell	Principal Investigator
NCT00565851	John P. Kuebler	Principal Investigator
NCT00565851	Michael P. Hopkins	Principal Investigator
NCT00565851	Howard M. Gross	Principal Investigator
NCT00565851	Howard M. Gross	Principal Investigator
NCT00565851	John P. Kuebler	Principal Investigator
NCT00565851	Mehmet S. Copur	Principal Investigator
NCT00565851	Howard M. Gross	Principal Investigator
NCT00565851	Mehmet S. Copur	Principal Investigator
NCT00565851	Mehmet S. Copur	Principal Investigator
NCT00565851	Mehmet S. Copur	Principal Investigator
NCT00565851	Steven E. Waggoner	Principal Investigator
NCT00565851	Peter G. Rose	Principal Investigator
NCT00565851	Peter G. Rose	Principal Investigator
NCT00565851	David M. O'Malley	Principal Investigator
NCT00565851	John P. Kuebler	Principal Investigator
NCT00565851	John P. Kuebler	Principal Investigator
NCT00565851	John P. Kuebler	Principal Investigator
NCT00565851	John P. Kuebler	Principal Investigator
NCT00565851	John P. Kuebler	Principal Investigator
NCT00565851	John P. Kuebler	Principal Investigator
NCT00565851	John P. Kuebler	Principal Investigator
NCT00565851	Howard M. Gross	Principal Investigator
NCT00565851	Howard M. Gross	Principal Investigator
NCT00565851	Howard M. Gross	Principal Investigator
NCT00565851	Howard M. Gross	Principal Investigator
NCT00565851	John P. Kuebler	Principal Investigator
NCT00565851	John P. Kuebler	Principal Investigator
NCT00565851	John P. Kuebler	Principal Investigator
NCT00565851	Howard M. Gross	Principal Investigator
NCT00565851	Howard M. Gross	Principal Investigator
NCT00565851	Howard M. Gross	Principal Investigator
NCT00565851	Howard M. Gross	Principal Investigator
NCT00565851	Howard M. Gross	Principal Investigator
NCT00565851	Howard M. Gross	Principal Investigator
NCT00565851	Howard M. Gross	Principal Investigator
NCT00565851	Howard M. Gross	Principal Investigator
NCT00565851	Howard M. Gross	Principal Investigator
NCT00565851	John P. Kuebler	Principal Investigator
NCT00565851	John P. Kuebler	Principal Investigator
NCT00565851	John P. Kuebler	Principal Investigator
NCT00565851	John P. Kuebler	Principal Investigator
NCT00565851	Peter G. Rose	Principal Investigator
NCT00565851	Steven E. Waggoner	Principal Investigator
NCT00565851	Howard M. Gross	Principal Investigator
NCT00565851	John P. Kuebler	Principal Investigator
NCT00565851	John P. Kuebler	Principal Investigator
NCT00565851	John P. Kuebler	Principal Investigator
NCT00565851	John P. Kuebler	Principal Investigator
NCT00565851	Howard M. Gross	Principal Investigator
NCT00565851	Howard M. Gross	Principal Investigator
NCT00565851	Howard M. Gross	Principal Investigator
NCT00565851	Howard M. Gross	Principal Investigator
NCT00565851	Howard M. Gross	Principal Investigator
NCT00565851	John P. Kuebler	Principal Investigator
NCT00565851	Yovanni Casablanca	Principal Investigator
NCT00565851	John P. Kuebler	Principal Investigator
NCT00565851	Robert S. Mannel	Principal Investigator
NCT00565851	Robert S. Mannel	Principal Investigator
NCT00565851	Paul G. Montgomery	Principal Investigator
NCT00565851	Paul G. Montgomery	Principal Investigator
NCT00565851	Paul G. Montgomery	Principal Investigator
NCT00565851	Paul G. Montgomery	Principal Investigator
NCT00565851	Paul G. Montgomery	Principal Investigator
NCT00565851	Paul G. Montgomery	Principal Investigator
NCT00565851	Paul G. Montgomery	Principal Investigator
NCT00565851	Paul G. Montgomery	Principal Investigator
NCT00565851	Parviz Hanjani	Principal Investigator
NCT00565851	Nicholas P. Taylor	Principal Investigator
NCT00565851	Radhika P. Gogoi	Principal Investigator
NCT00565851	Radhika P. Gogoi	Principal Investigator
NCT00565851	Joshua P. Kesterson	Principal Investigator
NCT00565851	Thomas C. Krivak	Principal Investigator
NCT00565851	Robert A. Burger	Principal Investigator
NCT00565851	Stephen C. Rubin	Principal Investigator
NCT00565851	Stephen C. Rubin	Principal Investigator
NCT00565851	Thomas C. Krivak	Principal Investigator
NCT00565851	Radhika P. Gogoi	Principal Investigator
NCT00565851	Bernice L. Robinson-Bennett	Principal Investigator
NCT00565851	Radhika P. Gogoi	Principal Investigator
NCT00565851	Paul A. DiSilvestro	Principal Investigator
NCT00565851	Maria C. Bell	Principal Investigator
NCT00565851	Maria C. Bell	Principal Investigator
NCT00565851	Asheesh Shipstone	Principal Investigator
NCT00565851	Asheesh Shipstone	Principal Investigator
NCT00565851	Mehmet S. Copur	Principal Investigator
NCT00565851	Mehmet S. Copur	Principal Investigator
NCT00565851	Asheesh Shipstone	Principal Investigator
NCT00565851	Asheesh Shipstone	Principal Investigator
NCT00565851	Asheesh Shipstone	Principal Investigator
NCT00565851	Mehmet S. Copur	Principal Investigator
NCT00565851	Jayanthi S. Lea	Principal Investigator
NCT00565851	Jayanthi S. Lea	Principal Investigator
NCT00565851	Robert L. Coleman	Principal Investigator
NCT00565851	Aparna A. Kamat	Principal Investigator
NCT00565851	Aparna A. Kamat	Principal Investigator
NCT00565851	Theresa L. Werner	Principal Investigator
NCT00565851	Cheung Wong	Principal Investigator
NCT00565851	Cheung Wong	Principal Investigator
NCT00565851	Cheung Wong	Principal Investigator
NCT00565851	Asheesh Shipstone	Principal Investigator
NCT00565851	Susan C. Modesitt	Principal Investigator
NCT00565851	Asheesh Shipstone	Principal Investigator
NCT00565851	Weldon E. Chafe	Principal Investigator
NCT00565851	Janet L. Osborne	Principal Investigator
NCT00565851	Paul G. Montgomery	Principal Investigator
NCT00565851	Paul G. Montgomery	Principal Investigator
NCT00565851	Paul G. Montgomery	Principal Investigator
NCT00565851	Mehmet S. Copur	Principal Investigator
NCT00565851	Mehmet S. Copur	Principal Investigator
NCT00565851	Mehmet S. Copur	Principal Investigator
NCT00565851	Paul G. Montgomery	Principal Investigator
NCT00565851	Paul G. Montgomery	Principal Investigator
NCT00565851	Mehmet S. Copur	Principal Investigator
NCT00565851	Paul G. Montgomery	Principal Investigator
NCT00565851	Mehmet S. Copur	Principal Investigator
NCT00565851	Keith S. Lanier	Principal Investigator
NCT00565851	Paul G. Montgomery	Principal Investigator
NCT00565851	Mehmet S. Copur	Principal Investigator
NCT00565851	Paul G. Montgomery	Principal Investigator
NCT00565851	Mehmet S. Copur	Principal Investigator
NCT00565851	Amy D. Brockmeyer	Principal Investigator
NCT00565851	Paul G. Montgomery	Principal Investigator
NCT00565851	Paul G. Montgomery	Principal Investigator
NCT00565851	Heidi J. Gray	Principal Investigator
NCT00565851	Heidi J. Gray	Principal Investigator
NCT00565851	Paul G. Montgomery	Principal Investigator
NCT00565851	Paul G. Montgomery	Principal Investigator
NCT00565851	Heidi J. Gray	Principal Investigator
NCT00565851	Heidi J. Gray	Principal Investigator
NCT00565851	Heidi J. Gray	Principal Investigator
NCT00565851	Paul G. Montgomery	Principal Investigator
NCT00565851	Paul G. Montgomery	Principal Investigator
NCT00565851	Paul G. Montgomery	Principal Investigator
NCT00565851	Paul G. Montgomery	Principal Investigator
NCT00565851	Mehmet S. Copur	Principal Investigator
NCT00565851	Mehmet S. Copur	Principal Investigator
NCT00565851	Paul G. Montgomery	Principal Investigator
NCT00565851	Paul G. Montgomery	Principal Investigator
NCT00565851	Paul G. Montgomery	Principal Investigator
NCT00565851	Elizabeth L. Dickson Michelson	Principal Investigator
NCT00565851	Jonathan E. Tammela	Principal Investigator
NCT00565851	Jonathan E. Tammela	Principal Investigator
NCT00565851	Jonathan E. Tammela	Principal Investigator
NCT00565851	Jonathan E. Tammela	Principal Investigator
NCT00565851	Elizabeth L. Dickson Michelson	Principal Investigator
NCT00565851	David M. Kushner	Principal Investigator
NCT00565851	Elizabeth L. Dickson Michelson	Principal Investigator
NCT00565851	Elizabeth L. Dickson Michelson	Principal Investigator
NCT00565851	Elizabeth L. Dickson Michelson	Principal Investigator
NCT00565851	Robert L. Coleman	Principal Investigator
NCT00565851	William H. Bradley	Principal Investigator
NCT00565851	Rachel E. Lerner	Principal Investigator
NCT00565851	Jonathan E. Tammela	Principal Investigator
NCT00565851	Elizabeth L. Dickson Michelson	Principal Investigator
NCT00565851	Elizabeth L. Dickson Michelson	Principal Investigator
NCT00565851	Jonathan E. Tammela	Principal Investigator
NCT00565851	Elizabeth L. Dickson Michelson	Principal Investigator
NCT00565851	Elizabeth L. Dickson Michelson	Principal Investigator
NCT00565851	Keren Sturtz	Principal Investigator
NCT00565851	Nobuo Yaegashi	Principal Investigator
NCT00565851	Noriaki Sakuragi	Principal Investigator
NCT00565851	Satoshi Takeuchi	Principal Investigator
NCT00565851	Toshiaki Nakamura	Principal Investigator
NCT00565851	Takayuki Enomoto	Principal Investigator
NCT00565851	Nobuyuki Susumu	Principal Investigator
NCT00565851	Yoshiki Kudo	Principal Investigator
NCT00565851	Kazuhiro Takehara	Principal Investigator
NCT00565851	Aikou Okamoto	Principal Investigator
NCT00565851	Masaki Mandai	Principal Investigator
NCT00565851	Keiichi Fujiwara	Principal Investigator
NCT00565851	Kenji Tamura	Principal Investigator
NCT00565851	Tetsuro Oishi	Principal Investigator
NCT00565851	Chi-Heum Cho	Principal Investigator
NCT00565851	Sang Y. Park	Principal Investigator
NCT00565851	Yong Beom Kim	Principal Investigator
NCT00565851	Kwang-Beom Lee	Principal Investigator
NCT00565851	Jae W. Kim	Principal Investigator
NCT00565851	Jong-Min Lee	Principal Investigator
NCT00565851	Jae-Hoon Kim	Principal Investigator
NCT00565851	Young-Tak Kim	Principal Investigator
NCT00565851	Moon-Hong Kim	Principal Investigator
NCT00565851	Suk-Joon Chang	Principal Investigator
NCT00570323	Mothaffar Rimawi, MD	Principal Investigator
NCT00570323	Mothaffar Rimawi, MD	Sub-Investigator
NCT00570323	Kent Osborne, MD	Sub-Investigator
NCT00570323	Julie Nangia, MD	Sub-Investigator
NCT00570323	Polly Niravath, MD	Sub-Investigator
NCT00570323	Sao Jiralerspong, MD	Sub-Investigator
NCT00575419	Edward A Neuwelt, MD	Principal Investigator
NCT00575419	Edward A Neuwelt, MD	Principal Investigator
NCT00576654	Patricia LoRusso	Principal Investigator
NCT00576654	Patricia M. LoRusso	Principal Investigator
NCT00576654	Patricia M. LoRusso	Principal Investigator
NCT00576654	Sara M. Tolaney	Principal Investigator
NCT00576654	Amy M. Weise	Principal Investigator
NCT00576654	Jordan D. Berlin	Principal Investigator
NCT00578266	Shakila P. Khan, M.D.	Principal Investigator
NCT00578266	Shakila P Khan, M.D	Principal Investigator
NCT00578721	Jason Zell, MD	Principal Investigator
NCT00578721	Jason Zell, MD	Principal Investigator
NCT00581893	Erik K St. Louis, M.D.	Principal Investigator
NCT00581893	Erik K. St. Louis, M.D.	Principal Investigator
NCT00581893	Matthew Rizzo, M.D.	Sub-Investigator
NCT00581893	Mark A. Granner, M.D.	Sub-Investigator
NCT00581893	Miriam B. Zimmerman, Ph.D.	Sub-Investigator
NCT00581893	Gary Milavetz, Pharm.D.	Sub-Investigator
NCT00583193	Jose M Canive, M.D.	Principal Investigator
NCT00583193	Jose M Canive, M.D.	Principal Investigator
NCT00583349	James M McKiernan, MD	Principal Investigator
NCT00583349	James M McKiernan, MD	Principal Investigator
NCT00583466	Sergey V. Kantsevoy, M.D., Ph.D.	Principal Investigator
NCT00584571	Satish SC Rao, MD, PhD	Principal Investigator
NCT00585195	Pfizer CT.gov Call Center	Study Director
NCT00585754	Rajita Sinha, PhD	Principal Investigator
NCT00585780	Rajita Sinha, PhD	Principal Investigator
NCT00587496	Herbert E Kaufman, MD	Principal Investigator
NCT00587496	Herbert E Kaufman, MD	Principal Investigator
NCT00589316	Johnnie Orozco	Principal Investigator
NCT00589316	Johnnie J. Orozco	Principal Investigator
NCT00590187	Judy H. Chiao, M.D.	Study Director
NCT00590187	James Foran, M.D.	Principal Investigator
NCT00590187	Gary Schiller, M.D.	Principal Investigator
NCT00590187	Martha Arellano, M.D.	Principal Investigator
NCT00590187	Jessica Altman, M.D.	Principal Investigator
NCT00590187	Parameswaran Venugopal, M.D.	Principal Investigator
NCT00590187	Wendy Stock, M.D.	Principal Investigator
NCT00590187	Lori Maness, M.D.	Principal Investigator
NCT00590187	Stuart Goldberg, M.D.	Principal Investigator
NCT00590187	Meir Wetzler, M.D.	Principal Investigator
NCT00590187	Karen Seiter, M.D.	Principal Investigator
NCT00590187	David Claxton, M.D.	Principal Investigator
NCT00590187	Selina Luger, M.D.	Principal Investigator
NCT00590187	Madan Jagasia, M.D.	Principal Investigator
NCT00590187	Hagop Kantarjian, M.D.	Principal Investigator
NCT00591318	Brian A Fallon, MD	Principal Investigator
NCT00591318	Brian A Fallon, MD	Principal Investigator
NCT00591318	Jeffrey Lieberman, MD	Sub-Investigator
NCT00591318	Lawrence Kegeles, MD	Sub-Investigator
NCT00592306	Rajan Saggar, MD	Principal Investigator
NCT00592306	Rajan Saggar, M.D.	Principal Investigator
NCT00592306	David J Ross, M.D.	Sub-Investigator
NCT00592306	John Belperio, M.D.	Sub-Investigator
NCT00592306	Joseph P Lynch, III, M.D.	Sub-Investigator
NCT00592306	Abbas Ardehali, M.D.	Sub-Investigator
NCT00592306	Bernard Kubak, MD	Sub-Investigator
NCT00592306	Rajeev Saggar, MD	Sub-Investigator
NCT00592306	Sam Weigt, MD	Sub-Investigator
NCT00592306	Aric Gregson, MD	Sub-Investigator
NCT00594334	james liu, md	Principal Investigator
NCT00594334	leena palomo, dds msd	Principal Investigator
NCT00594334	james liu, md	Principal Investigator
NCT00594503	Paul G Harch, M.D.	Principal Investigator
NCT00594503	Paul G Harch, M.D.	Principal Investigator
NCT00595491	Andrew D Luster, MD, PhD	Principal Investigator
NCT00595491	Andrew D Luster, MD, Ph.D	Principal Investigator
NCT00595491	Daniel L Hamilos, MD	Sub-Investigator
NCT00595491	Benjamin D Medoff, MD	Sub-Investigator
NCT00596180	Paul G Harch, M.D.	Principal Investigator
NCT00596180	Paul G Harch, M.D.	Principal Investigator
NCT00597766	John Chae, MD	Principal Investigator
NCT00597766	John Chae, MD	Principal Investigator
NCT00601003	Giselle Sholler, MD	Study Chair
NCT00601003	William Roberts, MD	Principal Investigator
NCT00601003	Michael Isakoff, MD	Principal Investigator
NCT00601003	Don Eslin, MD	Principal Investigator
NCT00601003	Randal Wada, MD	Principal Investigator
NCT00601003	Michael Kelly, MD	Principal Investigator
NCT00601003	Deanna Mitchell, MD	Principal Investigator
NCT00601003	Giselle Sholler, MD	Principal Investigator
NCT00601003	Jawhar Rawwas, MD	Principal Investigator
NCT00601003	Kathleen Neville, MD	Principal Investigator
NCT00601003	William Ferguson, MD	Principal Investigator
NCT00601003	Javier Oesterheld, MD	Principal Investigator
NCT00601003	Valerie Brown, MD	Principal Investigator
NCT00601003	Jaqueline Kraveka, MD	Principal Investigator
NCT00601003	Ted Laetsch, MD	Principal Investigator
NCT00601003	Peter Zage, MD, PhD	Principal Investigator
NCT00601003	Mark Fluchel, MD	Principal Investigator
NCT00602160	Julie Wang, M.D.	Principal Investigator
NCT00602160	Xiu-Min Li	Study Director
NCT00602160	Stacie Jones, MD	Principal Investigator
NCT00602160	Julie Wang, M.D.	Principal Investigator
NCT00602797	Apar Ganti	Principal Investigator
NCT00602797	Mehmet S. Copur	Principal Investigator
NCT00602797	Irfan A. Vaziri	Principal Investigator
NCT00602797	Apar K. Ganti	Principal Investigator
NCT00602797	Apar K. Ganti	Principal Investigator
NCT00602797	Addison R. Tolentino	Principal Investigator
NCT00603109	Roja Motaghedi, MD	Principal Investigator
NCT00603109	Moris Angulo, MD	Principal Investigator
NCT00603109	Roja Motaghedi, MD	Principal Investigator
NCT00603109	Elizabeth G Diaz, CPNP	Sub-Investigator
NCT00603616	Scott D Lee, MD	Principal Investigator
NCT00603616	Scott D Lee, MD	Principal Investigator
NCT00603616	Michael Saunders, MD	Sub-Investigator
NCT00603616	Kindra Clark-Snustad, DNP, ARNP	Sub-Investigator
NCT00603616	Allison Fairbanks, DNP, ARNP	Sub-Investigator
NCT00603616	Scott Etter, RN	Sub-Investigator
NCT00603616	Cory Cullinan, RN	Sub-Investigator
NCT00603616	Adam Templeton, MD	Sub-Investigator
NCT00605319	Alexis Te, MD	Principal Investigator
NCT00605319	Alexis Te, MD	Principal Investigator
NCT00606411	John W Winkelman, MD, PhD	Principal Investigator
NCT00609154	Daniel Stein, MD	Principal Investigator
NCT00609154	Daniel Stein, MD	Principal Investigator
NCT00613561	Morris Kletzel, MD	Principal Investigator
NCT00614679	Barbara Trautmer, MD, PhD	Sub-Investigator
NCT00618397	Cindy Darnell, MD	Principal Investigator
NCT00618397	Cindy Darnell, MD	Principal Investigator
NCT00618657	Rita Mehta, M.D.	Principal Investigator
NCT00618657	Rita Mehta, M.D.	Principal Investigator
NCT00619879	Morris Kletzel, MD	Principal Investigator
NCT00619879	Morris Kletzel, MD	Principal Investigator
NCT00622895	George Georges	Principal Investigator
NCT00622895	Richard A. Nash	Principal Investigator
NCT00622895	George E. Georges	Principal Investigator
NCT00624429	Peggy Radford, MD	Principal Investigator
NCT00624429	Peggy Radford, MD	Principal Investigator
NCT00625079	Rajan Saggar, MD	Study Director
NCT00625378	Bayer Study Director	Study Director
NCT00625469	Rajan Saggar, MD	Principal Investigator
NCT00625469	Rajan Saggar, M.D.	Principal Investigator
NCT00625469	David J Ross, M.D.	Sub-Investigator
NCT00625469	John Belperio, M.D.	Sub-Investigator
NCT00625469	Joseph P Lynch, III, M.D.	Sub-Investigator
NCT00625469	Abbas Ardehali, M.D.	Sub-Investigator
NCT00625469	Rajeev Saggar, MD	Sub-Investigator
NCT00625469	David Zisman, MD	Sub-Investigator
NCT00625703	Jane Siegel, MD	Principal Investigator
NCT00625703	Roberto Santos, MD	Sub-Investigator
NCT00625703	Claude Prestidge, MD	Sub-Investigator
NCT00625703	Michael E Brown, MD	Sub-Investigator
NCT00625703	Chonnamet Techasaensiri, MD	Sub-Investigator
NCT00625703	Pablo J. Sanchez, MD	Sub-Investigator
NCT00625703	Steven Copenhaver, MD	Sub-Investigator
NCT00625703	Andrew Gelfand, MD	Sub-Investigator
NCT00627978	Linda Vahdat, MD	Principal Investigator
NCT00628238	Thomas J Kipps, M.D., Ph.D	Study Director
NCT00628238	Danelle F James, M.D.	Principal Investigator
NCT00628238	Thomas J Kipps, M.D., Ph.D.	Principal Investigator
NCT00628238	Danelle F James, M.D.	Principal Investigator
NCT00628238	Jennifer R Brown, M.D.,Ph.D	Principal Investigator
NCT00628238	Kanti Rai, M.D.	Principal Investigator
NCT00628238	Michael Grever, M.D.	Principal Investigator
NCT00628238	John Byrd, M.D.	Principal Investigator
NCT00628238	Thomas Lin, M.D.	Sub-Investigator
NCT00628238	William G Wierda, M.D., Ph.D.	Principal Investigator
NCT00628238	Michael J Keating, M.D., B.S.	Principal Investigator
NCT00628550	Tia Tortoriello Raymond, M.D.	Principal Investigator
NCT00628550	Tia Tortoriello Raymond, M.D.	Principal Investigator
NCT00628550	Timothy G Carroll, M.D.	Sub-Investigator
NCT00628550	Vivian Dimas, M.D.	Sub-Investigator
NCT00628550	Daniel Stromberg, M.D.	Sub-Investigator
NCT00628550	Craig Huang, M.D.	Sub-Investigator
NCT00630565	Daniel J. Weisdorf, MD	Principal Investigator
NCT00630565	Daniel J. Weisdorf, M.D.	Principal Investigator
NCT00632853	Jeffrey A. Bogart, MD	Study Chair
NCT00633685	Paul B Hicks, M.D., Ph.D.	Principal Investigator
NCT00633685	Michael Adams, Ph.D.	Principal Investigator
NCT00634803	Richard S Schottenfeld, MD	Principal Investigator
NCT00640744	Joel D Morrisett, PhD	Principal Investigator
NCT00640744	Addison M Taylor, MD, PhD	Study Director
NCT00640744	William Insull, MD	Study Chair
NCT00640744	Joel D Morrisett, PhD	Principal Investigator
NCT00654355	Steve Feldman, MD, PHD	Principal Investigator
NCT00654355	Steve R Feldman, MD, PHD	Principal Investigator
NCT00655967	Florian Birkmayer, M.D.	Principal Investigator
NCT00655967	Michael Bogenschutz, M.D.	Sub-Investigator
NCT00655993	Lennard Specht, M.D.	Principal Investigator
NCT00655993	Hemal J. Parekh, M.D.	Principal Investigator
NCT00655993	James D. Anholm, M.D.	Principal Investigator
NCT00656292	Michael J. Brown, M.D.	Principal Investigator
NCT00656292	Daryl Kor, M.D.	Principal Investigator
NCT00656292	Michael J. Brown, M.D.	Principal Investigator
NCT00659126	Edward Neuwelt	Principal Investigator
NCT00659126	Edward A. Neuwelt	Principal Investigator
NCT00659204	Mary S McCarthy, RN, PhD, CNSN	Principal Investigator
NCT00659204	Mary S. McCarthy, RN, PhD, CNSN	Principal Investigator
NCT00659204	Michael L Schlicher, RN, PhDc	Sub-Investigator
NCT00659204	Elizabeth J. Bridges, RN, PhD, C	Sub-Investigator
NCT00660218	Seung Shin Hahn, MD	Principal Investigator
NCT00660621	Renato V. LaRocca, MD	Principal Investigator
NCT00660621	Renato V. LaRocca, MD	Principal Investigator
NCT00662259	Martin P Paulus, MD	Principal Investigator
NCT00662259	Gregory Brown, PhD	Sub-Investigator
NCT00664755	Kevin Gray, MD	Principal Investigator
NCT00664755	Michael E Saladin, PhD	Principal Investigator
NCT00664755	Kevin Gray, MD	Principal Investigator
NCT00664755	Michael Saladin, PhD	Principal Investigator
NCT00669747	Jane Doerr, RN, MSN	Study Director
NCT00670202	Anju Nohria, MD	Principal Investigator
NCT00670202	Mark A. Creager, MD	Principal Investigator
NCT00670202	Anju Nohria, MD	Sub-Investigator
NCT00670202	Christopher Owens, MD	Sub-Investigator
NCT00670358	Grzegorz S. Nowakowski, M.D.	Study Chair
NCT00670358	Craig B. Reeder, M.D.	Principal Investigator
NCT00670358	Candido E. Rivera, M.D.	Principal Investigator
NCT00670358	Judy Olmos, R.N.	Study Chair
NCT00670358	Michele Maharaj, R.N.	Study Chair
NCT00670358	Grzegorz S. Nowakowski, M.D.	Principal Investigator
NCT00672139	Bob Rolleri	Study Director
NCT00679042	Jose Oberholzer, MD	Principal Investigator
NCT00679042	Jose Oberholzer, MD	Principal Investigator
NCT00679536	Sonali Chaudhury, MD	Principal Investigator
NCT00684970	Dan Goldstaub, PhD	Study Director
NCT00684970	Prof. Ofer Nativ, MD	Principal Investigator
NCT00684970	Dr. Avivit Peer, MD	Principal Investigator
NCT00684970	Dr. Raanan Berger, MD, PhD	Principal Investigator
NCT00684970	Dr. Eliahu Gez, MD	Principal Investigator
NCT00684970	Prof. Avishay Sella, MD	Principal Investigator
NCT00685295	Stephen H Thomas, MD, MPH	Principal Investigator
NCT00686556	Michael R. Verneris, MD	Principal Investigator
NCT00690924	Samjot Dhillon, MD	Principal Investigator
NCT00691067	Julia A Golier, M.D.	Principal Investigator
NCT00691067	Julia A Golier, M.D.	Principal Investigator
NCT00691132	Jian-Min Yuan, PhD	Principal Investigator
NCT00691132	Jian-Min Yuan, MD	Principal Investigator
NCT00692939	Paul Szabolcs, MD	Principal Investigator
NCT00692939	Paul Szabolcs, MD	Principal Investigator
NCT00693849	Anthony Harris, MD	Principal Investigator
NCT00693849	Barbara A. Cohen, PhD	Principal Investigator
NCT00693849	Bruce Russell, PhD	Principal Investigator
NCT00693849	Charles Debattista, MD	Principal Investigator
NCT00693849	Con Stough, PhD	Principal Investigator
NCT00693849	Elizabeth Wallis, PhD	Principal Investigator
NCT00693849	Harbans Multani, MD	Principal Investigator
NCT00693849	Jayashri Kulkarni, Prof	Principal Investigator
NCT00693849	Jeffrey Wilson, PhD	Principal Investigator
NCT00693849	Kamran Fallahpour, PhD	Principal Investigator
NCT00693849	Larry Hirshberg, PhD	Principal Investigator
NCT00693849	Martijn Arns, PhD	Principal Investigator
NCT00693849	Mona Ismail, MD	Principal Investigator
NCT00693849	Paul Fitzgerald, PhD	Principal Investigator
NCT00693849	Richard Clark, PhD	Principal Investigator
NCT00693849	Roger deBeus, PhD	Principal Investigator
NCT00693849	Steven Bruce, PhD	Principal Investigator
NCT00693849	Subhdeep Virk, MD	Principal Investigator
NCT00693849	Tim Usherwood, MD	Principal Investigator
NCT00693849	XiaoLei Yu Baran, MD	Principal Investigator
NCT00693849	Radu V Saveanu, MD	Principal Investigator
NCT00693849	Martijn Arns, PhD	Principal Investigator
NCT00694330	William Curry, MD	Principal Investigator
NCT00694330	William Curry, MD	Principal Investigator
NCT00694330	Patrick Wen, MD	Principal Investigator
NCT00695682	Paul M Beer, MD	Principal Investigator
NCT00695682	Paul M Beer, MD	Principal Investigator
NCT00699036	Dawn M Torres, MD	Principal Investigator
NCT00699036	Dawn M Torres, MD	Principal Investigator
NCT00699036	Stephen A Harrison, MD	Sub-Investigator
NCT00700882	Donald P. Lawrence, MD	Study Chair
NCT00700882	Kevin Kalinsky, MD	Principal Investigator
NCT00701701	Medical Monitor	Study Director
NCT00701987	Timothy Kuzel, MD	Principal Investigator
NCT00701987	Timothy Kuzel, MD	Principal Investigator
NCT00701987	Mario LaCouture, MD	Sub-Investigator
NCT00703105	Patrick Stiff, MD	Principal Investigator
NCT00703105	Brian Nickoloff, MD PhD	Sub-Investigator
NCT00703105	Cheryl Czerlanis, MD	Sub-Investigator
NCT00703105	Ronald Potkul, MD	Sub-Investigator
NCT00703105	Donna Smith, MD	Sub-Investigator
NCT00703105	Margo Shoup, MD	Sub-Investigator
NCT00703105	Amir Elmishad, MD	Sub-Investigator
NCT00703105	Alia Salhadar, MD	Sub-Investigator
NCT00703820	Jeffrey Rubnitz, MD	Principal Investigator
NCT00703820	Gary Dahl, MD	Principal Investigator
NCT00703820	Deborah E. Schiff, MD	Principal Investigator
NCT00703820	John Cunningham, MD	Principal Investigator
NCT00703820	Barbara Degar, MD	Principal Investigator
NCT00703820	Jeffrey Taub, MD	Principal Investigator
NCT00703820	Jeffrey Rubnitz, MD	Principal Investigator
NCT00703820	Paul Bowman, MD	Principal Investigator
NCT00703820	Allen Eng-Juh Yeoh, MD	Principal Investigator
NCT00704041	Martin J Edelman, MD	Principal Investigator
NCT00704041	Scott Strome, MD	Sub-Investigator
NCT00704041	Jeffrey Wolf, MD	Sub-Investigator
NCT00704041	Rodney Taylor, MD	Sub-Investigator
NCT00704041	Duane Sewell, MD	Sub-Investigator
NCT00705133	Rajan Saggar, MD	Principal Investigator
NCT00705133	David Zisman, MD	Principal Investigator
NCT00705133	Rajan Saggar, MD	Principal Investigator
NCT00705133	David Zisman, MD	Principal Investigator
NCT00705133	Rajeev Saggar, MD	Sub-Investigator
NCT00705133	Shelley Shapiro, MD PhD	Sub-Investigator
NCT00706576	Eric T Kimchi, MD	Principal Investigator
NCT00706576	Eric T Kimchi, MD	Principal Investigator
NCT00706576	Kevin F Staveley-O'Carroll, MD, PhD	Sub-Investigator
NCT00706576	Niraj J Gusani, MD	Sub-Investigator
NCT00706576	Yixing Jiang, MD, PhD	Sub-Investigator
NCT00706576	Jill Smith, MD	Sub-Investigator
NCT00706576	Ian Schreibman, MD	Sub-Investigator
NCT00706576	Harold Harvey, MD	Sub-Investigator
NCT00706576	Peter Waybill, MD	Sub-Investigator
NCT00706576	Ian Zagon, PhD	Sub-Investigator
NCT00706862	Karen Reckamp	Principal Investigator
NCT00706862	Missak Haigentz	Principal Investigator
NCT00706862	Jeffrey Crawford	Principal Investigator
NCT00706862	Davey Daniel	Principal Investigator
NCT00706862	David Spigel	Principal Investigator
NCT00707473	Ehab Y. Hanna, MD	Principal Investigator
NCT00707681	Cheng-Yuan Peng, MD	Principal Investigator
NCT00707681	Cheng-Yuan Peng, MD	Principal Investigator
NCT00708565	James D Anholm, MD	Principal Investigator
NCT00709202	Robert C Smith, M.D.	Principal Investigator
NCT00709202	Robert C Smith, M.D.	Principal Investigator
NCT00709215	Swaminathan Padmanabhan, MD	Principal Investigator
NCT00709215	Daneil J DeAngelo, MD, PhD.	Principal Investigator
NCT00709215	Daneil J DeAngelo, MD, PhD.	Principal Investigator
NCT00709215	Richard Stone, MD	Sub-Investigator
NCT00709215	L. Andres Sirulnik, MD	Sub-Investigator
NCT00709215	Martha Wadleigh, MD	Sub-Investigator
NCT00709215	Gregory Abel, MD, MPH	Sub-Investigator
NCT00709215	Susan L Buchanan, PA	Sub-Investigator
NCT00709215	Adriana Penicaud, PA	Sub-Investigator
NCT00709215	Ilene Galinsky, APRN	Sub-Investigator
NCT00709215	Eyal Attar, MD	Sub-Investigator
NCT00709215	Philip Amrein, MD	Sub-Investigator
NCT00709215	Karen Kuhn Ballen, MD	Sub-Investigator
NCT00709215	Monica Mita, MD	Sub-Investigator
NCT00709215	Alain Mita, MD	Principal Investigator
NCT00709735	Roger K Pitman, M.D.	Principal Investigator
NCT00709735	Lawrence Herz, M.D.	Sub-Investigator
NCT00709735	Scott P Orr, Ph.D.	Sub-Investigator
NCT00713739	Brian K. Auge, M.D.	Principal Investigator
NCT00713739	Sean P. Stroup, M.D.	Principal Investigator
NCT00713739	Brian K. Auge, M.D.	Principal Investigator
NCT00713739	Sean P. Stroup, M.D.	Principal Investigator
NCT00714142	Jeffrey L Lacy, PhD	Principal Investigator
NCT00714142	Charles K Stone, MD	Principal Investigator
NCT00714142	Charles K Stones, MD	Principal Investigator
NCT00715611	Andreas Rimner, MD	Principal Investigator
NCT00715611	Andreas Rimner, MD	Principal Investigator
NCT00715832	Paul Schwarzenberger, MD	Principal Investigator
NCT00715832	Joseph Coggin, PhD	Sub-Investigator
NCT00716066	George Georges	Principal Investigator
NCT00716066	Richard A. Nash	Principal Investigator
NCT00716066	George E. Georges	Principal Investigator
NCT00716066	James Bowen	Principal Investigator
NCT00716586	Gerald A Fishman, MD	Principal Investigator
NCT00718263	Novartis Pharmaceuticals	Study Director
NCT00718263	John A. Davis	Principal Investigator
NCT00719875	Maysa Abu-Khalaf, M.D.	Principal Investigator
NCT00719875	Maysa Abu-Khalaf, M.D.	Principal Investigator
NCT00719888	Ann Dahlberg	Principal Investigator
NCT00719888	Thomas R. Chauncey	Principal Investigator
NCT00719888	Ann Dahlberg	Principal Investigator
NCT00720785	Richard W Childs, M.D.	Principal Investigator
NCT00728520	Amit Verma, MD	Principal Investigator
NCT00728520	Suman Kambhampati, MD	Principal Investigator
NCT00728520	Peter J. Van Veldhuizen, MD	Sub-Investigator
NCT00728520	Chao H. Huang, MD	Sub-Investigator
NCT00728520	Chester Stone, MD	Sub-Investigator
NCT00730158	Edward Chu, MD	Principal Investigator
NCT00730158	Howard Hochester, MD	Principal Investigator
NCT00730158	Edward Chu, MD	Principal Investigator
NCT00732511	Nathaniel Winer, M.D.	Principal Investigator
NCT00734877	Gareth Morgan, MD, PhD	Principal Investigator
NCT00734877	Gareth Morgan, MD, PhD	Study Director
NCT00734877	Frits van Rhee, MD, PhD	Sub-Investigator
NCT00734877	Michele Fox, MD	Sub-Investigator
NCT00734877	Maurizio Zangari, MD	Sub-Investigator
NCT00734877	Atul Kothari, MD	Sub-Investigator
NCT00734877	Carolina Schinke, MD	Sub-Investigator
NCT00734877	Faith Davies, MD	Sub-Investigator
NCT00734877	Gareth Morgan, MD	Sub-Investigator
NCT00734877	Juan Crescencio, MD	Sub-Investigator
NCT00734877	Mary Burgess, MD	Sub-Investigator
NCT00734877	Meera Mohan, MD	Sub-Investigator
NCT00734877	Muthukumar Radhakrishnan, MD	Sub-Investigator
NCT00734877	Pankaj Mathur, MD	Sub-Investigator
NCT00734877	Sharmilan Thanendrajan, MD	Sub-Investigator
NCT00734877	Shadiqul Hogue, MD	Sub-Investigator
NCT00734877	Sandra Susanibar-Adaniya, MD	Sub-Investigator
NCT00736463	Craig D Williams	Principal Investigator
NCT00736463	Craig D Williams, PharmD	Principal Investigator
NCT00737256	Thomas P Beresford, MD	Principal Investigator
NCT00737893	Arthur L Burnett, MD	Principal Investigator
NCT00737893	Arthur L Burnett, M.D., MBA	Principal Investigator
NCT00737893	Patrick C Walsh, MD	Sub-Investigator
NCT00737893	Mohamad E Allaf, MD	Sub-Investigator
NCT00737893	Trinity Bivalacqua, M.D., Ph.D.	Sub-Investigator
NCT00737893	Jordan Dimitrakoff, M.D., Ph.D.	Sub-Investigator
NCT00737893	Brian Le, M.D.	Sub-Investigator
NCT00738413	Robert W Grady, Ph.D.	Principal Investigator
NCT00738413	Robert W Grady, Ph.D.	Principal Investigator
NCT00738413	Patricia J Giardina, M.D.	Sub-Investigator
NCT00745953	Ronald G Victor, MD	Principal Investigator
NCT00745953	Lidia S Szczepaniak, PhD	Study Director
NCT00746811	Kevin C. Maki, PhD	Study Director
NCT00748904	Samuel Sigal, MD	Principal Investigator
NCT00748904	Amy Tilara, MD	Sub-Investigator
NCT00748904	Ilan Weisberg, MD	Sub-Investigator
NCT00748904	Melanie Starcic, PA	Sub-Investigator
NCT00749203	Dennis Charney, MD	Principal Investigator
NCT00749203	Dennis Charney, MD	Principal Investigator
NCT00751153	Peter J Ruane, MB	Principal Investigator
NCT00752154	Dinesh Khanna, M.D.	Principal Investigator
NCT00752154	Dinesh Khanna, M.D., MS	Principal Investigator
NCT00752323	Andrew Sloan, MD	Principal Investigator
NCT00754208	Joan Daughton, MD	Principal Investigator
NCT00761098	Samuel H Sigal, MD	Principal Investigator
NCT00761098	Ilan S Weisberg, MD	Study Director
NCT00761098	Samuel H Sigal, MD	Principal Investigator
NCT00761098	Ilan S Weisberg, MD	Sub-Investigator
NCT00761098	Arun Jesudian, MD	Sub-Investigator
NCT00761098	Samuel H Sigal, MD	Principal Investigator
NCT00761098	Ilan S Weisberg, MD	Sub-Investigator
NCT00761098	Reem Sharaiha, MD	Sub-Investigator
NCT00761098	Brian Kim, MD	Sub-Investigator
NCT00761098	Robert Brown, MD, MPH	Sub-Investigator
NCT00761098	Lorna Dove, MD, MPH	Sub-Investigator
NCT00761098	Scott Fink, MD	Sub-Investigator
NCT00761267	Pfizer CT.gov Call Center	Study Director
NCT00762710	Tracy L Simpson, Ph.D.	Principal Investigator
NCT00768716	Michael H Court, BVSc, PhD	Principal Investigator
NCT00773357	Sherry A McKee, PhD	Principal Investigator
NCT00773357	Sherry A McKee, PhD	Principal Investigator
NCT00777114	Mark Kaminski, MD	Principal Investigator
NCT00777114	Rebecca Elstrom, MD	Principal Investigator
NCT00780494	Pamela Kunz, MD	Principal Investigator
NCT00780494	George Albert Fisher M.D. Ph.D.	Sub-Investigator
NCT00780494	James M Ford	Sub-Investigator
NCT00780494	Pamela Kunz	Principal Investigator
NCT00780962	Stephen J Traub, MD	Principal Investigator
NCT00788164	Cornelia L. Trimble, MD	Principal Investigator
NCT00788307	Brian J. Davis, M.D.	Study Chair
NCT00788307	Brian J. Davis, M.D.	Principal Investigator
NCT00791089	Hakan Oral, MD	Principal Investigator
NCT00792662	Prasad R Padala, M.D.	Principal Investigator
NCT00792662	Prasad R Padala, M.D.	Principal Investigator
NCT00793091	Ira Wong, MD	Study Director
NCT00793091	Lee Schwartz, MD	Principal Investigator
NCT00793091	John Hunkeler, MD	Principal Investigator
NCT00793091	David Hardten, MD	Principal Investigator
NCT00793091	Michael Rotberg, MD	Principal Investigator
NCT00793208	Mark A Socinski, MD	Principal Investigator
NCT00794040	Ellen Leibenluft, M.D.	Principal Investigator
NCT00794625	Joseph C. Blader, PhD, MSc	Principal Investigator
NCT00794625	Vivian Kafantaris, MD	Principal Investigator
NCT00794625	Joseph C. Blader, PhD, MSc	Principal Investigator
NCT00794625	Steven Pliszka, MD	Principal Investigator
NCT00794625	Thomas L. Matthews, M.D.	Sub-Investigator
NCT00796068	Filippo Milano	Principal Investigator
NCT00796068	Filippo Milano	Principal Investigator
NCT00797784	Francisco A Kerdel, M.D.	Principal Investigator
NCT00799513	Andrés J. Ferreri, MD	Study Chair
NCT00799513	Roberto Crocchiolo, MD	Sub-Investigator
NCT00799513	Silvia Govi, MD	Sub-Investigator
NCT00799864	Janssen Sciences Ireland UC Clinical Trial	Study Director
NCT00801086	James Metz, MD	Study Chair
NCT00801086	Baldassarre Stea, MD,PhD	Principal Investigator
NCT00801086	Jim Metz, MD	Principal Investigator
NCT00801216	Andrés J. Ferreri, MD	Study Chair
NCT00801216	Andrea Assanelli, MD	Sub-Investigator
NCT00801216	Roberto Crocchiolo, MD	Sub-Investigator
NCT00801216	Silvia Govi, MD	Sub-Investigator
NCT00801489	Gautam Borthakur, MD	Principal Investigator
NCT00801489	Gautam Borthakur, MD	Principal Investigator
NCT00802919	Robert C. Smith, MD, PhD	Principal Investigator
NCT00802919	Lawrence Maayan, MD	Principal Investigator
NCT00802919	Revital Amiaz, MD	Principal Investigator
NCT00803452	Gary N Foulks, MD	Principal Investigator
NCT00803452	Gary N Foulks, MD	Principal Investigator
NCT00805636	Eric Wong, MD	Principal Investigator
NCT00805636	Stephanie E Weiss, MD	Principal Investigator
NCT00805636	Kathryn Beal, MD	Principal Investigator
NCT00805636	Heron Dwight, MD	Principal Investigator
NCT00806221	Eric Simpson, MD	Principal Investigator
NCT00806221	Eric Simpson, MD	Principal Investigator
NCT00806221	Jon Hanifin, MD	Sub-Investigator
NCT00806221	Alfons Krol, MD	Sub-Investigator
NCT00806221	Susan Tofte, RN, MS, FNP	Sub-Investigator
NCT00808522	Alan S Klapper, MD	Sub-Investigator
NCT00808522	Steven Freidman, MD	Sub-Investigator
NCT00808522	Joseph Bottino, MD	Sub-Investigator
NCT00808522	Raffi Chalian, MD	Sub-Investigator
NCT00810524	Gao zhiliang, M. D.	Study Director
NCT00810524	gao zhiliang, doctor	Principal Investigator
NCT00810940	Michael Lekawa, MD	Principal Investigator
NCT00810940	John McGregor, MD	Principal Investigator
NCT00811785	Stephen G Kaler, M.D.	Principal Investigator
NCT00812240	Antoine Adenis, MD	Principal Investigator
NCT00812838	Mohit Khera, MD, MBA	Principal Investigator
NCT00812838	Larry I. Lipshultz, MD	Sub-Investigator
NCT00812838	Christopher P. Smith, MD	Sub-Investigator
NCT00813332	Kai LI, professor	Principal Investigator
NCT00813332	Kai LI, Professor	Principal Investigator
NCT00813449	Guo Jun, PI	Principal Investigator
NCT00813449	Jun Guo, professor	Principal Investigator
NCT00814073	Olivier Lortholary, MD, PhD	Principal Investigator
NCT00819507	Eric L Simpson, MD	Principal Investigator
NCT00821301	Bruce A Silver, M.D., FACP	Study Director
NCT00821301	Ed Stadtmauer, MD	Principal Investigator
NCT00821301	Suzanne Lentzsch, MD	Principal Investigator
NCT00821301	Swaminathan Padmanabhan, MD	Principal Investigator
NCT00822679	Sairam Parthasarathy, MD	Principal Investigator
NCT00822679	Sairam Parthasarathy, MD	Principal Investigator
NCT00823433	John E Uckele, MD	Principal Investigator
NCT00823433	John E Uckele, MD	Principal Investigator
NCT00823602	razieh firouzabadi, MD	Study Chair
NCT00823602	shahnaz ahmadi, MD	Principal Investigator
NCT00826527	Jeffrey M Frankel, MD	Principal Investigator
NCT00826527	Jeffrey M Frankel, MD	Principal Investigator
NCT00828009	Jyoti D. Patel	Study Chair
NCT00829647	Darren Sigal, MD	Principal Investigator
NCT00829647	Darren Sigal, MD	Principal Investigator
NCT00829647	Alan Saven, MD	Sub-Investigator
NCT00830531	Janet Soul, MD,CM	Principal Investigator
NCT00830531	Jonathan Davis, MD	Principal Investigator
NCT00830531	Kevin J Staley, MD	Principal Investigator
NCT00830531	Janet Soul, MD, CM	Principal Investigator
NCT00830531	Helen Christou, MD	Principal Investigator
NCT00831324	Susan M. Chang, MD	Principal Investigator
NCT00833339	Julia A Golier, MD	Principal Investigator
NCT00833339	Julia A. Golier, M.D.	Principal Investigator
NCT00834834	Barbara H. Stanley, PhD	Principal Investigator
NCT00835328	Diva D De Leon, MD	Principal Investigator
NCT00835328	Diva D De Leon, MD	Principal Investigator
NCT00835328	Charles A Stanley, MD	Sub-Investigator
NCT00837863	Dr Stephen Kemp	Principal Investigator
NCT00837863	Dr. Jorge Daaboul	Principal Investigator
NCT00837863	Dr Edward Reiter	Principal Investigator
NCT00837863	Dr. Leslie Soyka	Principal Investigator
NCT00837863	Dr. Finen Ugrasbul	Principal Investigator
NCT00837863	Dr. Lawrence Silverman	Principal Investigator
NCT00837863	Dr. Phyllis Speiser	Principal Investigator
NCT00837863	Dr Susan Rose	Principal Investigator
NCT00837863	Dr. Paul Thornton	Principal Investigator
NCT00837863	Dr Patricia Fetchner	Principal Investigator
NCT00837863	Dr. Gad Kletter	Principal Investigator
NCT00838955	Danielle Shafer, DO	Principal Investigator
NCT00838955	Danielle Shafer, DO	Principal Investigator
NCT00838955	Kevin Barton	Sub-Investigator
NCT00838955	Laura Michaelis	Sub-Investigator
NCT00838955	Sucha Nand	Sub-Investigator
NCT00838955	Tulio Rodriguez	Sub-Investigator
NCT00838955	Scott Smith	Sub-Investigator
NCT00838955	Patrick Stiff	Sub-Investigator
NCT00838955	David Vesole	Sub-Investigator
NCT00839865	Li Shufa, doctor	Study Chair
NCT00840177	Anjali Advani, MD	Study Chair
NCT00841386	James J Reidy, M.D.	Principal Investigator
NCT00841386	Michael Endl, M.D.	Principal Investigator
NCT00841386	Thomas R Elmer, M.D.	Sub-Investigator
NCT00841386	James J Reidy, M.D.	Principal Investigator
NCT00841386	Sandra L Everett, M.D.	Sub-Investigator
NCT00841789	Michael A Portman, MD	Principal Investigator
NCT00841789	Nadine Choueiter, MD	Principal Investigator
NCT00841789	Carolyn A. Altman, MD	Principal Investigator
NCT00841789	Michael A Portman, MD	Principal Investigator
NCT00841789	Nagib Dahdah, MD	Principal Investigator
NCT00842309	Sabine Wilhelm, PhD	Principal Investigator
NCT00843921	Mendel Tuchman, MD	Principal Investigator
NCT00843921	Mendel Tuchman, MD	Principal Investigator
NCT00845351	Mary Lee Vance, MD	Principal Investigator
NCT00845351	Mary Lee Vance, MD	Principal Investigator
NCT00846690	Femme L Ambrosio, DDS	Principal Investigator
NCT00846690	Arthur H Jeske, DDS, PhD	Study Chair
NCT00846690	Robert Tate, DDS MS	Sub-Investigator
NCT00846742	Monika Metzger, MD, MSc	Principal Investigator
NCT00846742	Michael Link, MD	Principal Investigator
NCT00846742	Amy E Geddis, MD, Ph.D	Principal Investigator
NCT00846742	Anne Rossi, MD	Principal Investigator
NCT00846742	Alison Friedmann, MD	Principal Investigator
NCT00846742	Amy Billett, MD	Principal Investigator
NCT00846742	Monika Metzger, MD, MSc	Principal Investigator
NCT00846742	Angela Punnett, MD	Principal Investigator
NCT00855335	Janssen Scientific Affairs, LLC Clinical Trial	Study Director
NCT00856037	Apar Ganti	Principal Investigator
NCT00856037	Apar K. Ganti	Principal Investigator
NCT00856596	Jeffrey Weinberg, MD	Principal Investigator
NCT00856596	Jeffrey Weinberg, MD	Principal Investigator
NCT00857597	Blair A Jobe, MD	Principal Investigator
NCT00857597	Nicole D Bouvy, MD, PhD	Principal Investigator
NCT00857597	Blair A Jobe, MD	Principal Investigator
NCT00857597	Nicole D Bouvy, MD, PhD	Principal Investigator
NCT00858364	MD	Study Director
NCT00859495	Robert N Taub, MD, PhD	Principal Investigator
NCT00859781	Scott T Tagawa, M.D.	Principal Investigator
NCT00859781	David Quinn, MD, PhD	Principal Investigator
NCT00859781	George K Philips, MD	Principal Investigator
NCT00859781	Julio Hajdenberg, MD	Principal Investigator
NCT00859781	Omer Kucuk, MD	Principal Investigator
NCT00859781	Noah Hahn, M.D.	Principal Investigator
NCT00859781	Daniel Vaena, M.D.	Principal Investigator
NCT00859781	Peter Van Velduizen, MD	Principal Investigator
NCT00859781	Scott T Tagawa, M.D.	Principal Investigator
NCT00862446	William F Walsh, MD	Principal Investigator
NCT00863122	Jaishri O Blakeley, MD	Principal Investigator
NCT00863122	William H Slattery, MD	Principal Investigator
NCT00863122	Marco Giovannini, MD	Sub-Investigator
NCT00863122	Jaishri O Blakeley, MD	Principal Investigator
NCT00863122	John Niparko, MD	Sub-Investigator
NCT00863122	Scott Plotkin, MD	Principal Investigator
NCT00863122	David Tran, MD	Principal Investigator
NCT00863122	Matthias Karajannis, MD	Principal Investigator
NCT00863122	Jeffrey Allen, MD	Sub-Investigator
NCT00863122	J T Roland, MD	Sub-Investigator
NCT00863122	John Golfinos, MD	Sub-Investigator
NCT00863122	Pamela Roehm, MD	Sub-Investigator
NCT00863122	David Zagzag, PhD	Sub-Investigator
NCT00863122	Kaleb Yohay, MD	Principal Investigator
NCT00863122	D. Bradley Welling, MD	Principal Investigator
NCT00863122	Abraham Jacob, MD	Sub-Investigator
NCT00863122	Edward E Dodson, MD	Sub-Investigator
NCT00863499	Barbara A. Cohen, PhD	Principal Investigator
NCT00863499	Harbans Multani, MD	Principal Investigator
NCT00863499	Kamran Fallahpour, PhD	Principal Investigator
NCT00863499	Martijn Arns, PhD	Principal Investigator
NCT00863499	Mona Ismail, MD	Principal Investigator
NCT00863499	Roger deBeus, PhD	Principal Investigator
NCT00863499	Simon Clarke, MD	Principal Investigator
NCT00863499	Simon Clarke, MD	Principal Investigator
NCT00863499	Martijn Arns, PhD	Principal Investigator
NCT00867737	Rogelio Menendez, MD	Principal Investigator
NCT00867737	Rogelio Menendez, MD	Principal Investigator
NCT00867815	Bayer Study Director	Study Director
NCT00868010	Ellen M Whyte, MD	Principal Investigator
NCT00868010	Nancy Landgraff, PhD	Principal Investigator
NCT00868010	Howard Aizenstein, MD, PhD	Sub-Investigator
NCT00868010	Ellen M Whyte, MD	Principal Investigator
NCT00868010	Meryl Butters, PhD	Sub-Investigator
NCT00868010	Ariel Gildengers, MD	Sub-Investigator
NCT00868010	Jordan Karp, MD	Sub-Investigator
NCT00868010	Oscar Lopez, MD	Sub-Investigator
NCT00868010	Sati Mazumdar, MD	Sub-Investigator
NCT00868010	Michael Munin, MD	Sub-Investigator
NCT00868010	Charles Reynolds, MD	Sub-Investigator
NCT00868010	Elizabeth Skidmore, PhD	Sub-Investigator
NCT00870974	David Russell, MD	Principal Investigator
NCT00870974	David Russell, MD,PhD	Principal Investigator
NCT00870974	Danna Jennings, MD	Sub-Investigator
NCT00871013	Gareth Morgan, MD, PhD	Principal Investigator
NCT00871013	Frits van Rhee, M.D.,Ph.D.	Sub-Investigator
NCT00871013	Maurizio Zangari, MD	Sub-Investigator
NCT00871013	Atul Kothari, MD	Sub-Investigator
NCT00871013	Carolina Schinke, MD	Sub-Investigator
NCT00871013	Faith Davies, MD	Sub-Investigator
NCT00871013	Gareth Morgan, MD	Sub-Investigator
NCT00871013	Juan Crescencio, MD	Sub-Investigator
NCT00871013	Mary Burgess, MD	Sub-Investigator
NCT00871013	Meera Mohan, MD	Sub-Investigator
NCT00871013	Muthukumar Radhakrishnan, MD	Sub-Investigator
NCT00871013	Pankaj Mathur, MD	Sub-Investigator
NCT00871013	Sharmilan Thanendrajan, MD	Sub-Investigator
NCT00871533	Ahmad Tarhini, MD	Principal Investigator
NCT00871845	Hossam M Kandil, MD, PhD	Principal Investigator
NCT00872378	Patrick J McCarthy, M.D.	Principal Investigator
NCT00872378	Ngocthuy Hughes, MD	Sub-Investigator
NCT00872378	Stephen B Archer, MD FACS	Sub-Investigator
NCT00872378	Patrick J McCarthy, MD	Principal Investigator
NCT00872378	Travis L Monchamp, MD	Sub-Investigator
NCT00875693	Usama Gergis, MD	Principal Investigator
NCT00875693	Usama Gergis, MD	Principal Investigator
NCT00877110	Shakeel Modak, MD	Principal Investigator
NCT00877110	Shakeel Modak, MD	Principal Investigator
NCT00878254	Izidore S. Lossos, MD	Principal Investigator
NCT00878254	Izidore S Lossos, MD	Principal Investigator
NCT00879060	Martin S Maron, MD	Principal Investigator
NCT00881920	Carlos Ramos, MD	Principal Investigator
NCT00882895	Keith Stockerl-Goldstein, MD	Principal Investigator
NCT00882895	Keith Stockerl-Goldstein, MD	Principal Investigator
NCT00882895	Amanda Cashen, M.D.	Sub-Investigator
NCT00882895	Nancy Bartlett, M.D.	Sub-Investigator
NCT00882895	Camille Abboud, M.D.	Sub-Investigator
NCT00882895	John DiPersio, M.D., Ph.D.	Sub-Investigator
NCT00882895	Michael Tomasson, M.D.	Sub-Investigator
NCT00882895	Geoffrey Uy, M.D.	Sub-Investigator
NCT00882895	Ravi Vij, M.D.	Sub-Investigator
NCT00882895	Matthew Walter, M.D.	Sub-Investigator
NCT00882895	Peter Westervelt, M.D., Ph.D.	Sub-Investigator
NCT00882960	Alan R Janssen, D.O.	Study Chair
NCT00882960	Ryan P Kirby, M.D.	Principal Investigator
NCT00882960	Stuart Etengoff, D.O.	Study Director
NCT00882960	Ryan P Kirby, M.D.	Principal Investigator
NCT00882960	Stuart Etengoff, D.O.	Sub-Investigator
NCT00882960	Alan R Janssen, D.O.	Sub-Investigator
NCT00887068	Richard E. Champlin, MD, BS	Principal Investigator
NCT00887146	Kurt Jaeckle, MD	Study Chair
NCT00888615	Bradley Monk	Principal Investigator
NCT00888615	Bradley J. Monk	Principal Investigator
NCT00888615	Babak Edraki	Principal Investigator
NCT00888615	Bradley J. Monk	Principal Investigator
NCT00888615	Susan A. Davidson	Principal Investigator
NCT00888615	Mark M. Hoffman	Principal Investigator
NCT00888615	Philip J. Stella	Principal Investigator
NCT00888615	Mark M. Hoffman	Principal Investigator
NCT00888615	John W. McBroom	Principal Investigator
NCT00888615	William E. Richards	Principal Investigator
NCT00888615	Philip J. Stella	Principal Investigator
NCT00888615	Jacob Rotmensch	Principal Investigator
NCT00888615	Meaghan E. Tenney	Principal Investigator
NCT00888615	James L. Wade	Principal Investigator
NCT00888615	James L. Wade	Principal Investigator
NCT00888615	James L. Wade	Principal Investigator
NCT00888615	Sudarshan K. Sharma	Principal Investigator
NCT00888615	Meaghan E. Tenney	Principal Investigator
NCT00888615	Jeanne M. Schilder	Principal Investigator
NCT00888615	Gregory P. Sutton	Principal Investigator
NCT00888615	Joseph J. Merchant	Principal Investigator
NCT00888615	Shaker R. Dakhil	Principal Investigator
NCT00888615	Shaker R. Dakhil	Principal Investigator
NCT00888615	Shaker R. Dakhil	Principal Investigator
NCT00888615	Shaker R. Dakhil	Principal Investigator
NCT00888615	Shaker R. Dakhil	Principal Investigator
NCT00888615	Shaker R. Dakhil	Principal Investigator
NCT00888615	Shaker R. Dakhil	Principal Investigator
NCT00888615	Shaker R. Dakhil	Principal Investigator
NCT00888615	Shaker R. Dakhil	Principal Investigator
NCT00888615	Shaker R. Dakhil	Principal Investigator
NCT00888615	Shaker R. Dakhil	Principal Investigator
NCT00888615	Shaker R. Dakhil	Principal Investigator
NCT00888615	Shaker R. Dakhil	Principal Investigator
NCT00888615	Shaker R. Dakhil	Principal Investigator
NCT00888615	Shaker R. Dakhil	Principal Investigator
NCT00888615	Shaker R. Dakhil	Principal Investigator
NCT00888615	Shaker R. Dakhil	Principal Investigator
NCT00888615	Frederick R. Ueland	Principal Investigator
NCT00888615	Giles Fort	Principal Investigator
NCT00888615	Paul Celano	Principal Investigator
NCT00888615	Philip J. Stella	Principal Investigator
NCT00888615	Philip J. Stella	Principal Investigator
NCT00888615	Raymond S. Lord	Principal Investigator
NCT00888615	Raymond S. Lord	Principal Investigator
NCT00888615	Raymond S. Lord	Principal Investigator
NCT00888615	Philip J. Stella	Principal Investigator
NCT00888615	Philip J. Stella	Principal Investigator
NCT00888615	James T. Thigpen	Principal Investigator
NCT00888615	James L. Wade	Principal Investigator
NCT00888615	David G. Mutch	Principal Investigator
NCT00888615	Jay W. Carlson	Principal Investigator
NCT00888615	Jay W. Carlson	Principal Investigator
NCT00888615	Nicola M. Spirtos	Principal Investigator
NCT00888615	David P. Warshal	Principal Investigator
NCT00888615	Michael L. Pearl	Principal Investigator
NCT00888615	James M. Granfortuna	Principal Investigator
NCT00888615	James M. Granfortuna	Principal Investigator
NCT00888615	John M. McDonald	Principal Investigator
NCT00888615	James M. Granfortuna	Principal Investigator
NCT00888615	James E. Radford	Principal Investigator
NCT00888615	James E. Radford	Principal Investigator
NCT00888615	Charles H. Pippitt	Principal Investigator
NCT00888615	Charles H. Pippitt	Principal Investigator
NCT00888615	James M. Granfortuna	Principal Investigator
NCT00888615	Charles H. Pippitt	Principal Investigator
NCT00888615	James M. Granfortuna	Principal Investigator
NCT00888615	Charles H. Pippitt	Principal Investigator
NCT00888615	Charles H. Pippitt	Principal Investigator
NCT00888615	Charles H. Pippitt	Principal Investigator
NCT00888615	Charles H. Pippitt	Principal Investigator
NCT00888615	Samuel S. Lentz	Principal Investigator
NCT00888615	Esther H. Rehmus	Principal Investigator
NCT00888615	Peter G. Rose	Principal Investigator
NCT00888615	Peter G. Rose	Principal Investigator
NCT00888615	John P. Kuebler	Principal Investigator
NCT00888615	John P. Kuebler	Principal Investigator
NCT00888615	Thomas J. Reid	Principal Investigator
NCT00888615	Peter G. Rose	Principal Investigator
NCT00888615	Robert S. Mannel	Principal Investigator
NCT00888615	Robert S. Mannel	Principal Investigator
NCT00888615	Parviz Hanjani	Principal Investigator
NCT00888615	Albert S. DeNittis	Principal Investigator
NCT00888615	Albert S. DeNittis	Principal Investigator
NCT00888615	Albert S. DeNittis	Principal Investigator
NCT00888615	Paul A. DiSilvestro	Principal Investigator
NCT00888615	Helen L. Frederickson	Principal Investigator
NCT00888615	Helen L. Frederickson	Principal Investigator
NCT00888615	Asheesh Shipstone	Principal Investigator
NCT00888615	Asheesh Shipstone	Principal Investigator
NCT00888615	Asheesh Shipstone	Principal Investigator
NCT00888615	Asheesh Shipstone	Principal Investigator
NCT00888615	Lois M. Ramondetta	Principal Investigator
NCT00888615	Lois M. Ramondetta	Principal Investigator
NCT00888615	Lois M. Ramondetta	Principal Investigator
NCT00888615	Cheung Wong	Principal Investigator
NCT00888615	Susan C. Modesitt	Principal Investigator
NCT00888615	Asheesh Shipstone	Principal Investigator
NCT00888615	Jori S. Carter	Principal Investigator
NCT00888615	Janet L. Osborne	Principal Investigator
NCT00888615	Benjamin E. Greer	Principal Investigator
NCT00888615	Benjamin E. Greer	Principal Investigator
NCT00888615	Benjamin E. Greer	Principal Investigator
NCT00888615	Benjamin E. Greer	Principal Investigator
NCT00888615	Benjamin E. Greer	Principal Investigator
NCT00888615	Benjamin E. Greer	Principal Investigator
NCT00888615	Benjamin E. Greer	Principal Investigator
NCT00888615	Jonathan E. Tammela	Principal Investigator
NCT00888615	Jonathan E. Tammela	Principal Investigator
NCT00888615	Jonathan E. Tammela	Principal Investigator
NCT00888615	David M. Kushner	Principal Investigator
NCT00888615	Jonathan E. Tammela	Principal Investigator
NCT00888615	Jonathan E. Tammela	Principal Investigator
NCT00889629	Mariana Markell, MD	Principal Investigator
NCT00889629	Mariana Markell, MD	Principal Investigator
NCT00889629	Sima Terebelo, MPH, RPA-C	Sub-Investigator
NCT00890162	Melody C Carter, M.D.	Principal Investigator
NCT00891280	Study Director	Study Director
NCT00891280	Donald Northfelt, MD	Principal Investigator
NCT00891280	Robert F Marschke, MD	Principal Investigator
NCT00891280	R. McFarland, MD	Principal Investigator
NCT00891280	R. Alvarez, MD	Principal Investigator
NCT00892385	Jennifer Eads, MD	Principal Investigator
NCT00892606	Anupama Wadhwa, MD	Principal Investigator
NCT00892606	Anupama Wadhwa, MD	Principal Investigator
NCT00892606	Jim Jackson, MD	Sub-Investigator
NCT00892606	David Seligson, MD	Sub-Investigator
NCT00892606	Heidi Koenig, MD	Sub-Investigator
NCT00892606	Laura Clark, MD	Sub-Investigator
NCT00893074	Ryan Vandrey, Ph.D.	Principal Investigator
NCT00893074	Ryan Vandrey, Ph.D.	Principal Investigator
NCT00894751	Junzheng wu, MD	Principal Investigator
NCT00895531	Anupama Wadhwa, MD	Principal Investigator
NCT00895531	Anupama Wadhwa, MD	Principal Investigator
NCT00896181	Alexander Colevas	Principal Investigator
NCT00896181	Alexander D. Colevas	Principal Investigator
NCT00896493	Wen-Kai Weng	Principal Investigator
NCT00896493	Wen-Kai Weng	Principal Investigator
NCT00896493	Ranjana Hira Advani	Sub-Investigator
NCT00896493	Sally Arai	Sub-Investigator
NCT00896493	Jonathan Benjamin	Sub-Investigator
NCT00896493	Richard T. Hoppe	Sub-Investigator
NCT00896493	Laura A Johnson	Sub-Investigator
NCT00896493	Youn H Kim	Sub-Investigator
NCT00896493	Robert Lowsky	Sub-Investigator
NCT00896493	David Miklos	Sub-Investigator
NCT00896493	Robert S Negrin	Sub-Investigator
NCT00896493	Judith Anne Shizuru	Sub-Investigator
NCT00897676	Diva D DeLeon, MD	Principal Investigator
NCT00897676	Diva D De Leon, MD	Principal Investigator
NCT00897676	Charles A Stanley, MD	Sub-Investigator
NCT00900744	Myra Barginear, MD	Principal Investigator
NCT00902044	Nabil M Ahmed, MD	Principal Investigator
NCT00904488	Jo E. Rodgers, PharmD	Principal Investigator
NCT00906269	James Graydon, MD	Principal Investigator
NCT00906308	Mary Tagliaferri, M.D, L.Ac.	Study Director
NCT00906529	Steve Fordan, MD	Principal Investigator
NCT00906529	John Richard, MD	Study Director
NCT00906529	Philip Raskin, MD	Study Chair
NCT00906529	Steve Fordan, MD	Principal Investigator
NCT00906529	John Richard, MD	Sub-Investigator
NCT00906529	Chanhaeng Rhee, MD	Sub-Investigator
NCT00906529	Philip Raskin, MD	Principal Investigator
NCT00906529	Alok Mohan, MD	Sub-Investigator
NCT00908050	William G Ondo, MD	Principal Investigator
NCT00908050	William G Ondo, MD	Principal Investigator
NCT00908466	Quan D Nguyen, MD, MSc	Principal Investigator
NCT00908778	Hugo Quiroz-Mercado, MD	Principal Investigator
NCT00908778	Naresh Mandova, MD	Principal Investigator
NCT00909363	James B Bussel, MD	Principal Investigator
NCT00910650	Antoni Ribas, MD	Principal Investigator
NCT00910650	Bartosz Chmielowski, MD, PhD	Principal Investigator
NCT00910650	James S Economou, MD, PhD	Principal Investigator
NCT00910650	John A Glaspy, MD, MPH	Principal Investigator
NCT00911560	Brian Kushner, MD	Principal Investigator
NCT00911560	Brian Kushner, MD	Principal Investigator
NCT00914017	Marie E Wood, MD	Principal Investigator
NCT00914017	Laura Esserman, MD	Principal Investigator
NCT00914017	Stephen Grubbs, MD	Principal Investigator
NCT00914017	Judy Garber, MD, MPH	Principal Investigator
NCT00914017	John Ellerton, MD	Principal Investigator
NCT00914017	Victoria Seewaldt, MD	Principal Investigator
NCT00914017	James Atkins, MD	Principal Investigator
NCT00914017	Marie E Wood, MD	Principal Investigator
NCT00914823	Stephanie B. Seminara, MD	Principal Investigator
NCT00914823	Stephanie B. Seminara, MD	Principal Investigator
NCT00914823	Yee-Ming Chan, MD, PhD	Sub-Investigator
NCT00914823	Margaret Lippincott, MD	Sub-Investigator
NCT00915369	D Raghunadharao, DM	Principal Investigator
NCT00915369	Govind Babu, DM	Principal Investigator
NCT00915369	Anish Maru, DM	Principal Investigator
NCT00915681	Todd Mitchell, MD	Principal Investigator
NCT00915681	Todd Mitchell, MD	Principal Investigator
NCT00916058	Tsiporah Shore, M.D.	Principal Investigator
NCT00916058	Tsiporah Shore, M.D.	Principal Investigator
NCT00916058	Eric Feldman, M.D.	Sub-Investigator
NCT00916058	Ruben Niesvizky, M.D.	Sub-Investigator
NCT00916058	Tomer Mark, M.D.	Sub-Investigator
NCT00916058	Usama Gergis, M.D.	Sub-Investigator
NCT00918463	Rebecca Elstrom, MD	Principal Investigator
NCT00918463	Rebecca Elstrom, MD	Principal Investigator
NCT00919503	Lauri Burroughs	Principal Investigator
NCT00919503	Lauri M. Burroughs	Principal Investigator
NCT00919503	Julie-An M. Talano	Principal Investigator
NCT00921115	Qamar Khan, MD	Principal Investigator
NCT00921115	Qamar Khan, MD	Principal Investigator
NCT00921115	Brian Petroff, PhD	Sub-Investigator
NCT00921115	Priyanka Sharma, MD	Sub-Investigator
NCT00921115	Carol Fabian, MD	Sub-Investigator
NCT00923013	Robert J Kreitman, M.D.	Principal Investigator
NCT00923936	Robert Yarchoan, M.D.	Principal Investigator
NCT00924118	Steven P Schulman, MD	Principal Investigator
NCT00924118	Steven P Schulman, MD	Principal Investigator
NCT00924170	Robert J Kreitman, M.D.	Principal Investigator
NCT00925002	Pfizer CT.gov Call Center	Study Director
NCT00925119	Amber L. Beitelshees, PharmD, MPH	Principal Investigator
NCT00925119	Alan Shuldiner, MD	Sub-Investigator
NCT00925119	Richard Horenstein, MD	Sub-Investigator
NCT00925119	Stephen Liggett, MD	Sub-Investigator
NCT00925119	John C. McLenithan, PhD	Sub-Investigator
NCT00925119	John Gottdiener, MD	Sub-Investigator
NCT00927771	Valerie D Callender, MD	Principal Investigator
NCT00927771	Valerie D Callender, MD	Principal Investigator
NCT00927771	Cheshana Kindred, MD, MBA	Sub-Investigator
NCT00927771	Cherie Young, MD	Sub-Investigator
NCT00929045	Peter D Patrick, PhD	Principal Investigator
NCT00930072	Miriam Treggiari, MD	Principal Investigator
NCT00931255	Abdolreza Haririan, MD, MPH	Principal Investigator
NCT00931255	David Klassen, MD	Sub-Investigator
NCT00931255	Matthew Cooper, MD	Sub-Investigator
NCT00931931	Timothy Cripe, M.D., PhD.	Study Director
NCT00931931	Timothy Cripe, MD, PhD	Principal Investigator
NCT00934219	Charles Glueck, MD	Principal Investigator
NCT00935597	Keren Osman, M.D.	Principal Investigator
NCT00935597	Keren Osman, MD	Principal Investigator
NCT00936520	Diana V Do, MD	Principal Investigator
NCT00936520	Diana V Do, MD	Principal Investigator
NCT00936520	Peter A Campochiaro, MD	Sub-Investigator
NCT00936520	Peter L Gehlbach, MD, PhD	Sub-Investigator
NCT00936520	Gulnar Hafiz, MD	Sub-Investigator
NCT00936520	James T Handa, MD	Sub-Investigator
NCT00936520	Quan D Nguyen, MD, MSc	Sub-Investigator
NCT00936520	Howard C Ying, MD, PhD	Sub-Investigator
NCT00936520	Ingrid Zimmer-Galler, MD	Sub-Investigator
NCT00936936	Yago Nieto, MD, PHD	Study Chair
NCT00936936	Yago Nieto, MD, PHD	Principal Investigator
NCT00937261	Steven G Potkin, M.D.	Principal Investigator
NCT00937261	Steven G Potkin, M.D.	Principal Investigator
NCT00939523	Odelia Cooper, MD	Principal Investigator
NCT00939523	Odelia Cooper, MD	Principal Investigator
NCT00939913	Arthur G Grant, MD	Principal Investigator
NCT00941642	Edward A Mena, MD	Principal Investigator
[truncated: 35,249 more rows]

## Sheet: 5_Suspended_LineByLine
NCT Number	Last name	Role
NCT00200902	Andrew F. Leuchter, MD	Principal Investigator
NCT00243984	Frederick Whittier, MD	Principal Investigator
NCT00264472	Howard Burris, III, MD	Principal Investigator
NCT00275405	Howard S Smith, MD	Principal Investigator
NCT00275405	Shaker A Mousa, PhD	Principal Investigator
NCT00275405	Ahmad Aljada, PhD	Principal Investigator
NCT00278122	William W. Grosh, MD	Principal Investigator
NCT00332124	Randy Ross, MD	Principal Investigator
NCT00346502	Tapas K. Das Gupta, MD, PhD, DSc	Principal Investigator
NCT00387478	Deepen Patel, MD, CCFP	Principal Investigator
NCT00392106	Warren Jackman, MD	Principal Investigator
NCT00392106	Hugh Calkins, MD	Principal Investigator
NCT00443573	Ted Love, MD	Study Chair
NCT00499499	Ewa Matczak	Study Director
NCT00541333	Richard B Rosen, MD	Principal Investigator
NCT00582088	Ronald Reisler, MD	Principal Investigator
NCT00584454	Mark Goldberg, MD	Principal Investigator
NCT00587457	Ramy Ibrahim, M.D.	Study Director
NCT00591357	Daniel M Musher, MD	Principal Investigator
NCT00591682	Jennifer J. Wheler, MD	Principal Investigator
NCT00607711	Sachin Shah, MD	Study Director
NCT00610051	Richard Pacher, MD	Principal Investigator
NCT00664196	Richard P Junghans, PhD, MD	Principal Investigator
NCT00665652	Elijah W. Stommel, MD, PhD	Principal Investigator
NCT00673829	Richard P Junghans, PhD, MD	Principal Investigator
NCT00701207	Elliott D. Crouser, M.D.	Principal Investigator
NCT00704821	Gary Schwartz, MD	Principal Investigator
NCT00712296	Juan P Wisnivesky, MD, MPH	Principal Investigator
NCT00712322	Herman Ellman, MD	Study Director
NCT00723099	Rachel Salit	Principal Investigator
NCT00735124	Badie Mansour, MD	Principal Investigator
NCT00747669	ZARS Clinical Development	Study Chair
NCT00761228	Elkan R Gamzu, PhD	Principal Investigator
NCT00761228	Ross D Zafonte, DO	Principal Investigator
NCT00775476	Andras Perl, M.D., Ph.D.	Principal Investigator
NCT00777816	Alan Solinger, M.D.	Study Director
NCT00790764	Gabriel P. Lasala, MD	Principal Investigator
NCT00804154	John D Heiss, M.D.	Principal Investigator
NCT00853502	Anne Klibanski, MD	Principal Investigator
NCT00865488	Eran Kurman, B.med.Sc, MBA	Study Chair
NCT00879190	Natali Aziz MD	Principal Investigator
NCT00901290	Eleanor Lisbon, MD, MPH	Principal Investigator
NCT00903630	Levi S. Downs, MD	Principal Investigator
NCT00909558	David Korn, D.O., M.D.	Principal Investigator
NCT00911248	Jay Barth, MD	Principal Investigator
NCT00926640	Anish Thomas, M.D.	Principal Investigator
NCT00935012	Pfizer CT.gov Call Center	Study Director
NCT00939549	Justin McArthur, MBBS, MPH	Principal Investigator
NCT00939549	Robert Brodsky, M.D	Principal Investigator
NCT00939549	Daniel Harrison, MD	Study Director
NCT00940641	Raj Chetty, MBBS, MD, FRCPath.	Principal Investigator
NCT00945009	Peter Ehrlich, MD MSC	Principal Investigator
NCT00947193	Jay Barth, MD	Principal Investigator
NCT00964561	Ralph A. Schutz, M.D.	Principal Investigator
NCT00968162	John Horan, MD	Principal Investigator
NCT01006369	Rebecca A. Moss, MD	Principal Investigator
NCT01012817	Andrea Wahner Hendrickson	Principal Investigator
NCT01014767	Johannes Wolff, MD	Principal Investigator
NCT01028560	Gabriele de Vos, M.D., M.Sc.	Principal Investigator
NCT01067118	Bruce A. Buckingham	Principal Investigator
NCT01076699	Robert Hardi, M.D., CPI	Principal Investigator
NCT01083966	John Boockvar, MD	Principal Investigator
NCT01087294	James N Kochenderfer, M.D.	Principal Investigator
NCT01122342	Sabrina M Witherby, MD	Principal Investigator
NCT01122342	Hyman Muss, MD	Principal Investigator
NCT01122342	Marie Wood, MD	Principal Investigator
NCT01125449	G D Murphy, MD	Principal Investigator
NCT01125449	J Bolt, PhD	Study Director
NCT01147016	Amy Weise, M.D.	Principal Investigator
NCT01153919	Howard Liebman	Principal Investigator
NCT01164098	Alessia Fornoni, M.D.	Principal Investigator
NCT01164098	George W. Burke, M.D.	Study Director
NCT01168908	Daniel P Judge, MD	Principal Investigator
NCT01168908	Kathryn R. Wagner, M.D., Ph.D.	Principal Investigator
NCT01170650	Binh Nguyen, MD	Study Director
NCT01192568	Branka Palic	Study Director
NCT01211691	Morgan Lam	Study Director
NCT01231906	Patrick Leavey, MD	Principal Investigator
NCT01240629	Jacek Pinski	Principal Investigator
NCT01266460	Warner Huh	Principal Investigator
NCT01267253	John K. Chan, MD	Principal Investigator
NCT01267643	Ramon V. Tiu, M.D.	Principal Investigator
NCT01279616	Sandeep Soni, MD	Study Chair
NCT01287078	Nicole J Gormley, M.D.	Principal Investigator
NCT01313416	Samir N. Khleif, MD	Principal Investigator
NCT01332331	GSK Clinical Trials	Study Director
NCT01337518	Aby Buchbinder, MD	Study Director
NCT01337518	Daniel Danila, MD	Principal Investigator
NCT01337518	Johann de Bono, MD	Principal Investigator
NCT01340183	Mark Yen, MD	Principal Investigator
NCT01340183	David Melnick	Study Director
NCT01343394	James E. Baumgartner, MD	Principal Investigator
NCT01343394	Linda S. Baumgartner, CCC-SLP, LSLS CERT.AVT	Principal Investigator
NCT01343394	Samir Fakhri, MD	Principal Investigator
NCT01345565	Ira J Fox, MD	Principal Investigator
NCT01345578	Ira J Fox, MD	Principal Investigator
NCT01351103	Novartis Pharmaceuticals	Study Director
NCT01368887	Shay Marcus	Study Director
NCT01368887	Nelli Konnikov, M.D.	Principal Investigator
NCT01368887	Nancy Naguib, M.D.	Principal Investigator
NCT01368887	Carolyn Stanger	Principal Investigator
NCT01386710	John Boockvar, MD	Principal Investigator
NCT01402817	Chie-Schin Shih, MD	Principal Investigator
NCT01420965	Samir N. Khleif, MD	Principal Investigator
NCT01445041	Charles M Cotten, MD MHS	Principal Investigator
NCT01452126	Nicholas Lam, MD	Principal Investigator
NCT01463215	Robert Johnston	Study Chair
NCT01465100	Ira J Fox, MD	Principal Investigator
NCT01468831	Catherine A Cukras, M.D.	Principal Investigator
NCT01468844	Catherine A Cukras, M.D.	Principal Investigator
NCT01472809	Rajendrakumar H Jani, PhD(Medical)	Study Director
NCT01472809	Kevinkumar Kansagra, MD	Principal Investigator
NCT01497444	Mitesh J. Borad, MD	Study Chair
NCT01504659	Demitri Papolos, MD	Principal Investigator
NCT01508832	Ronald Miller, MD	Principal Investigator
NCT01514357	Alessandro Cataliotti, MD, PhD	Principal Investigator
NCT01515384	Chief Medical Officer	Study Director
NCT01537107	Charles Erlichman, M.D.	Principal Investigator
NCT01553149	Katherine Warren	Principal Investigator
NCT01572493	Kevin C Conlon, M.D.	Principal Investigator
NCT01577199	Owen Davis, MD	Principal Investigator
NCT01595061	Neil Horowitz	Principal Investigator
NCT01604863	GSK Clinical Trials	Study Director
NCT01618656	Deepak C D'Souza, MD	Principal Investigator
NCT01628640	Mitesh Borad	Principal Investigator
NCT01653028	Mark Dickson	Principal Investigator
NCT01655524	Rami Doukky, MD	Principal Investigator
NCT01662895	Magdy Selim, MD, PhD	Principal Investigator
NCT01665573	Mohini Ranganathan, MD	Principal Investigator
NCT01684657	Gerald Maguire, M.D.	Principal Investigator
NCT01702714	Clinical Trials	Study Director
NCT01706965	Jeffrey A Lieberman, M.D.	Principal Investigator
NCT01711528	Shaji Kumar	Principal Investigator
NCT01720836	Arjun Pennathur, MD	Principal Investigator
NCT01722305	Han Tun	Principal Investigator
NCT01729923	Stacey Cohen	Principal Investigator
NCT01738672	Manuel Vallejo, DMD MD	Principal Investigator
NCT01762410	Anthony El-Khoueiry, MD	Principal Investigator
NCT01764750	Terrence F Holekamp, MD, PhD	Principal Investigator
NCT01764750	Lawrence G Lenke, MD	Study Chair
NCT01769222	Holbrook Kohrt	Principal Investigator
NCT01779336	Dr Anthony El-Khoueiry, MD	Principal Investigator
NCT01780662	Peter Cole	Principal Investigator
NCT01811212	Manisha Shah	Principal Investigator
NCT01812759	Knox H. Todd, MD	Principal Investigator
NCT01817075	Danielle Zerr, MD MPH	Principal Investigator
NCT01818063	Edith Mitchell, MD	Principal Investigator
NCT01818479	Michael Boyer, MD	Principal Investigator
NCT01824693	Christopher Dvorak	Principal Investigator
NCT01841463	Adil Daud, MD	Principal Investigator
NCT01841463	Kevin B Kim, MD	Principal Investigator
NCT01841736	Emily Bergsland	Principal Investigator
NCT01842308	Suzanne Hayman	Principal Investigator
NCT01847573	Diana M Escolar, MD	Study Director
NCT01853644	Mario Pineda, MD, PhD	Principal Investigator
NCT01864018	Shaji Kumar	Principal Investigator
NCT01897077	Robert Wood, MD	Principal Investigator
NCT01897077	Corinne Keet, MD, MS	Principal Investigator
NCT01897077	Hugh Sampson, MD	Principal Investigator
NCT01922076	Sabine Mueller	Principal Investigator
NCT01922921	Lupe Salazar	Principal Investigator
NCT01929239	Richard P Junghans, PhD, MD	Principal Investigator
NCT01932697	Daniel Ma	Principal Investigator
NCT01938833	Laura Austin, MD	Principal Investigator
NCT01950195	Michael Lim, MD	Principal Investigator
NCT01956864	Kirti Shetty, MD	Principal Investigator
NCT01958658	Amit Oza	Principal Investigator
NCT01959490	Paula Silverman, MD	Principal Investigator
NCT01964300	Stewart Goldman	Principal Investigator
NCT01964755	Juan Carlos Ramos, MD	Principal Investigator
NCT01964755	Dirk Dittmer, PhD	Principal Investigator
NCT01978366	Diana M Escolar, MD	Study Director
NCT01990326	Michael S Singer, M.D., Ph.D.	Study Director
NCT02011971	Kimford J Meador, MD	Principal Investigator
NCT02015117	Evan Wuthrick	Principal Investigator
NCT02018250	Mohamed S Al-Ibrahim, MD, ChB, FACP	Principal Investigator
NCT02046551	Albert Arias, MD	Principal Investigator
NCT02054104	David S Schrump, M.D.	Principal Investigator
NCT02059265	David Hyman	Principal Investigator
NCT02065687	Victoria Bae-Jump	Principal Investigator
NCT02066181	Mrinal Gounder	Principal Investigator
NCT02069080	Joshua M Farber, M.D.	Principal Investigator
NCT02074410	Steve Whitaker, MD	Study Director
NCT02075034	Mark Heaney, MD	Principal Investigator
NCT02077010	Nicholas Haglund, MD	Principal Investigator
NCT02077010	Zachary L Cox, PharmD	Principal Investigator
NCT02079740	Ryan Corcoran	Principal Investigator
NCT02080260	John S Salmon, MD	Principal Investigator
NCT02080260	Edward Kim, MD	Principal Investigator
NCT02100150	Wesley R Cole, Ph.D	Principal Investigator
NCT02100150	Kurt Denninghoff, MD	Principal Investigator
NCT02100150	Alex Hishaw, MD	Principal Investigator
NCT02100150	Brian O'Neil, MD	Principal Investigator
NCT02101944	Craig Hofmeister	Principal Investigator
NCT02117336	Dr Alexey V Danilov, MD, PhD	Principal Investigator
NCT02117336	Dr Jennifer R Brown, MD, PhD	Principal Investigator
NCT02134080	Michael H. Bloch, MD, MS	Principal Investigator
NCT02135133	Jennifer Brown, MD, PhD	Principal Investigator
NCT02152137	Robert Smallridge, M.D.	Study Chair
NCT02153905	Steven A Rosenberg, M.D.	Principal Investigator
NCT02162225	Natalia Dixon, MD	Principal Investigator
NCT02162225	Daniel B Kim-Shapiro, PhD	Study Director
NCT02168725	Antonio Jimeno, MD, PhD	Principal Investigator
NCT02173093	Maxim Yankelevich	Principal Investigator
NCT02203526	Kieron M Dunleavy, M.D.	Principal Investigator
NCT02204345	Clinical Trials	Study Director
NCT02225106	Eric M Wassermann, M.D.	Principal Investigator
NCT02231853	Pawel J Muranski, M.D.	Principal Investigator
NCT02233829	Gene-Jack Wang, M.D.	Principal Investigator
NCT02249949	Michael Pishvaian, MD, PhD	Study Chair
NCT02289300	Kai-Wen Huang, MD	Principal Investigator
NCT02296346	Benjamin Segal, MD	Principal Investigator
NCT02296346	Daniel Couriel, MD	Principal Investigator
NCT02623439	Grace Ku, MD	Principal Investigator

## Sheet: 6_Terminated_LineByLine
NCT Number	Last name	Role
NCT00020722	Lawrence G. Lum, MD, DSc	Study Chair
NCT00057954	Francine M. Foss, MD	Study Chair
NCT00068094	Steve Solga, MD	Principal Investigator
NCT00070291	Ranjana Advani, MD	Study Chair
NCT00090779	Christine Hogan, MD	Study Chair
NCT00091078	Jonathan Trent	Principal Investigator
NCT00093704	Sven De Vos, MD	Principal Investigator
NCT00098111	Bruce E Sands, M.D.,M.S.	Principal Investigator
NCT00098371	John Byrd	Principal Investigator
NCT00098488	Thomas Lin	Principal Investigator
NCT00099177	Clinical Trials	Study Director
NCT00099203	Clinical Trials	Study Director
NCT00099346	Medical Monitor	Study Director
NCT00100152	Medical Monitor	Study Director
NCT00100685	Mihail Obrocea, MD	Study Director
NCT00101088	Tiong Ong	Principal Investigator
NCT00101361	William Bauman, MD	Study Chair
NCT00102024	Andres Forero, M.D.	Principal Investigator
NCT00102635	Edward S Kim, MD	Principal Investigator
NCT00102791	Jonathan W Stocker, Ph.D.	Study Director
NCT00102895	Pfizer CT.gov Call Center	Study Director
NCT00103090	Edward S. Kim	Study Chair
NCT00103103	Heinz-Josef Lenz, MD	Study Chair
NCT00103272	Kristie Blum	Principal Investigator
NCT00104351	Medical Monitor	Study Director
NCT00104884	David H. Lawson, MD	Study Chair
NCT00105222	Gregory J Kato, M.D.	Principal Investigator
NCT00106054	Pfizer CT.gov Call Center	Study Director
NCT00106262	Don S Dizon, MD	Principal Investigator
NCT00107471	Patricia L. Robertson, MD	Study Chair
NCT00107471	Richard A. Axtell, MD	Study Chair
NCT00107666	Walter Newman, Ph.D.	Study Director
NCT00108056	Teri N Kreisl, M.D.	Principal Investigator
NCT00108108	Novartis Pharmaceuticals	Study Director
NCT00108108	Novartis	Study Chair
NCT00108433	Pfizer CT.gov Call Center	Study Director
NCT00108485	Ronald Goldberg, MD	Principal Investigator
NCT00109577	Bonnie J Kaplan, PhD	Principal Investigator
NCT00109772	Donald C Manning, MD, PhD	Study Director
NCT00109850	Charles R. Thomas, MD	Study Chair
NCT00109850	Charles D. Blanke, MD, FACP	Study Chair
NCT00109850	James L. Abbruzzese, MD	Study Chair
NCT00109850	Lisa Hammond, MD	Study Chair
NCT00109850	Vivek Mehta, MD	Study Chair
NCT00110032	Stephen Michael Hahn	Principal Investigator
NCT00110123	Serge Leyvraz, MD	Study Chair
NCT00110136	Michelle Naughton, PhD	Study Chair
NCT00110344	Bayer Study Director	Study Director
NCT00111150	Dawn K Smith, MD, MS, MPH	Study Chair
NCT00111150	Lynn A Paxton, MD, MPH	Study Chair
NCT00111306	Anna Barry	Study Director
NCT00111917	Lisa A Maier, MD,MSPH	Principal Investigator
NCT00112164	Michael Matthay	Study Chair
NCT00112281	Judith S. Hochman, M.D.	Study Chair
NCT00112619	Susan M. Blaney, MD	Study Chair
NCT00112684	Manisha Shah	Principal Investigator
NCT00112723	Jeffrey Jones	Principal Investigator
NCT00112749	Patricia A. Ganz, MD	Principal Investigator
NCT00112905	Robert Dreicer	Principal Investigator
NCT00113321	Hagop Kantarjian, MD	Principal Investigator
NCT00113386	Maria Werner-Wasik, MD	Principal Investigator
NCT00113386	Howard L. West, MD	Principal Investigator
NCT00113386	Jeffrey Crawford, MD	Study Chair
NCT00113386	Chandra P. Belani, MD	Study Chair
NCT00113386	James R. Jett, MD	Study Chair
NCT00113399	Stuart J. Wong, MD	Principal Investigator
NCT00113503	Stephen B Hanauer, MD	Principal Investigator
NCT00113971	Anna Barry	Study Director
NCT00114062	Amy Schaberg, BSN	Study Director
NCT00114374	Naomi M Simon, MD	Principal Investigator
NCT00114946	Mary Sugrue, M.D.	Study Director
NCT00114959	Adam R Craig, M.D., PhD	Study Director
NCT00114959	Jorge Cortes, M.D.	Principal Investigator
NCT00115063	Donna H Ryan, MD	Principal Investigator
NCT00115336	Charles T. Quinn, MD	Study Chair
NCT00115349	John Porter, MD	Principal Investigator
NCT00115349	Patricia J. Giardina, MD	Study Chair
NCT00115349	Ellis J. Neufeld, MD	Study Chair
NCT00115349	Elliott P, Vichinsky, MD	Study Chair
NCT00115349	Sonja McKinlay, Ph.D.	Study Chair
NCT00115661	Dan I Lebovic, MD, MA	Principal Investigator
NCT00116571	Graeme Boniface, PhD	Study Director
NCT00117884	Medical Director	Study Director
NCT00118053	Deborah L. Toppmeyer, MD	Principal Investigator
NCT00119015	Robert M Naclerio, MD	Principal Investigator
NCT00119210	Nancy A Rigotti, MD	Principal Investigator
NCT00120172	Stuart Lichtman, MD	Study Chair
NCT00120198	Lodovico Balducci, MD	Study Chair
NCT00120289	Ruth McBride	Study Director
NCT00120289	William E. Boden, MD	Principal Investigator
NCT00120289	Jeffrey Probstfield, MD	Principal Investigator
NCT00120328	Jessica Mann, MD, PhD	Study Director
NCT00121186	Patrick J. Stiff, MD	Study Chair
NCT00121186	Scott E. Smith, MD, PhD, FACP	Study Chair
NCT00121784	Clinical Trials	Study Chair
NCT00122980	Russell E. Ware, MD, PhD	Principal Investigator
NCT00122980	Ronald W. Helms, PhD	Principal Investigator
NCT00123877	John H. Ward, MD	Principal Investigator
NCT00123890	GSK Clinical Trials, Ph.D.	Study Director
NCT00124579	Gordan Srkalovic, MD, PhD	Principal Investigator
NCT00124579	Mohamad A. Hussein, MD	Principal Investigator
NCT00124644	William G. Blum, MD	Principal Investigator
NCT00124748	Novartis Pharmaceuticals	Study Director
NCT00124891	Medical Monitor, MD	Study Director
NCT00124891	Trial Manager	Principal Investigator
NCT00124891	Trial Manager	Principal Investigator
NCT00124891	Trial Manager	Principal Investigator
NCT00124891	Trial Manager	Principal Investigator
NCT00124891	Trial Manager	Principal Investigator
NCT00124891	Trial Manager	Principal Investigator
NCT00124891	Trial Manager	Principal Investigator
NCT00124891	Trial Manager	Principal Investigator
NCT00125411	George Wilding, MD	Principal Investigator
NCT00126191	Ann S. La Casce, MD	Principal Investigator
NCT00126568	Panayiotis Savvides	Principal Investigator
NCT00126607	Madeleine Kane	Principal Investigator
NCT00126659	Eric Jonasch	Principal Investigator
NCT00126763	Richard Rauck, MD	Principal Investigator
NCT00126789	Richard Rauck, MD	Principal Investigator
NCT00127101	Medical Monitor	Study Director
NCT00127335	Paul S Phillips, MD	Principal Investigator
NCT00127335	Harminder Sikand, PharmD	Study Director
NCT00128115	Medical Monitor	Study Director
NCT00128921	Maurizio Zangari, MD	Principal Investigator
NCT00129870	Yasir Nagarwala, M.D.	Study Director
NCT00129948	Francis Giles, MD	Principal Investigator
NCT00130260	Matt Hohenboken, MD, PhD	Study Director
NCT00130312	Edmund J Lewis, MD	Study Director
NCT00130312	Robert C Atkins, M.D.	Principal Investigator
NCT00130312	Dick deZeeuw, M.D.	Principal Investigator
NCT00130312	Itamar Raz, M.D.	Principal Investigator
NCT00130390	Maria Carrion, MD	Study Director
NCT00130806	Medical Monitor	Study Director
NCT00131391	Medical Monitor	Study Director
NCT00131404	Medical Monitor	Study Director
NCT00132002	Thehang Luu	Principal Investigator
NCT00133679	Roberta L Keller, MD	Principal Investigator
NCT00137293	Medical Monitor	Study Director
NCT00137332	Medical Monitor	Study Director
NCT00137345	Medical Monitor	Study Director
NCT00137345	Trial Manager	Principal Investigator
NCT00137345	Trial Manager	Principal Investigator
NCT00137345	Trial Manager	Principal Investigator
NCT00137345	Trial Manager	Principal Investigator
NCT00137345	Trial Manager	Principal Investigator
NCT00137345	Trial manager	Principal Investigator
NCT00137345	Trial Manager	Principal Investigator
NCT00137345	Trial Manager	Principal Investigator
NCT00137345	Trial Manager	Principal Investigator
NCT00137345	Trial Manager	Principal Investigator
NCT00137345	Trial Manager	Principal Investigator
NCT00138125	Richard J. Pietras, MD, PhD	Principal Investigator
NCT00138229	Steven A. Rosenberg, MD, PhD	Principal Investigator
NCT00139256	Lucky Jain, M.D.	Principal Investigator
NCT00140855	Robert G Maki, MD PhD	Principal Investigator
NCT00141011	Warren Wasiewski, M.D.	Study Director
NCT00142051	Debra Weiner, MD, PhD	Principal Investigator
NCT00143091	Pfizer CT.gov Call Center	Study Director
NCT00145184	Wafaie Fawzi, MD, DrPH	Principal Investigator
NCT00145418	Chadi Nabhan, MD	Principal Investigator
NCT00145431	Pfizer CT.gov Call Center	Study Director
NCT00147355	Sarah L Pett, M.D	Principal Investigator
NCT00150319	Pfizer CT.gov Call Center	Study Director
NCT00153777	Lut Van Damme, MD, MSc, PhD	Principal Investigator
NCT00156962	MD	Study Director
NCT00160147	Global Clinical Director Solvay	Study Director
NCT00161356	Hadar J. Merhav, MD	Principal Investigator
NCT00162071	E Gordon DePuey, MD	Principal Investigator
NCT00162084	Mark Hibberd, MD, PhD	Study Director
NCT00164099	David S Seres, MD	Principal Investigator
NCT00166127	Jerrold H Levy, MD	Principal Investigator
NCT00166712	Joseph R Leventhal, MD, PhD	Principal Investigator
NCT00174369	Pfizer CT.gov Call Center	Study Director
NCT00174603	Philip G Janicak, MD	Principal Investigator
NCT00174811	ICD CSD	Study Director
NCT00176241	Susanne Arnold, MD	Principal Investigator
NCT00176293	John Rinehart, MD	Principal Investigator
NCT00176475	Roger Strair, MD, PhD	Principal Investigator
NCT00176631	Robert S. DiPaola, MD	Principal Investigator
NCT00176644	Mark Stein, MD	Principal Investigator
NCT00177255	Nathan Bahary, MD	Principal Investigator
NCT00177775	Peter Veldkamp, MD	Principal Investigator
NCT00177853	A. J. Moser, MD	Principal Investigator
NCT00178581	Margaret M McQuiggan, MS, RD, CNSD	Principal Investigator
NCT00179205	Alp Ikizler, MD	Principal Investigator
NCT00181272	Jerry A Krishnan, MD, PhD	Principal Investigator
NCT00181896	Joseph Biederman, MD	Principal Investigator
NCT00183963	Dennis Holmes	Principal Investigator
NCT00183976	Anil Tulpule, MD	Principal Investigator
NCT00184548	Global Clinical Registry (GCR, 1452)	Study Director
NCT00194792	Hannah Linden	Principal Investigator
NCT00195312	Medical Monitor, MD	Study Director
NCT00195312	Trial Manager	Principal Investigator
NCT00195312	Trial Manager	Principal Investigator
NCT00197145	GSK Clinical Trials, Ph.D.	Study Director
NCT00197197	GSK Clinical Trials, Ph.D.	Study Director
NCT00198081	Christian M. Schmidt, MD	Principal Investigator
NCT00199381	Neil Sussman, MD	Study Director
NCT00201448	Stuart Adler, M.D.	Principal Investigator
NCT00201734	Tony Bekaii-Saab	Principal Investigator
NCT00203047	Jean-Louis Stril, MD	Study Chair
NCT00203151	Dan Goldsatub, Ph.D.	Study Director
NCT00203723	Randall Espinoza, MD, MPH	Principal Investigator
NCT00203931	Michael Maitland, M.D.	Principal Investigator
NCT00205049	Michael R Lucey, MD	Principal Investigator
NCT00206089	AstraZeneca Medical Science Director, MD	Study Director
NCT00206440	Mothaffar Rimawi, MD	Principal Investigator
NCT00208117	Karina W Davidson, PhD	Principal Investigator
NCT00209417	Judith A Johnson, MS, MBA	Study Director
NCT00209599	James Jones, MD,PharmD	Study Director
NCT00210561	Johnson &amp; Johnson Pharmaceutical Research and Development, L.L.C. Clinical Trial	Study Director
NCT00210626	Tracy McGowan	Study Director
NCT00211562	Peter Buckley, M.D.	Principal Investigator
NCT00215527	Patricia I Dickson, M.D.	Principal Investigator
NCT00215540	Carlos Guardia, MD	Study Director
NCT00215540	Matthew M Laughon, MD, MPH	Principal Investigator
NCT00215852	David R Strayer, MD	Study Director
NCT00216008	Chris Garrett, MD	Principal Investigator
NCT00216047	Kathy Miller, M.D.	Study Chair
NCT00216086	Elena Gabriela Chiorean, M.D.	Study Chair
NCT00216151	Attaya Suvannasankha, M.D.	Study Chair
NCT00216164	Michael Robertson, M.D.	Study Chair
NCT00216216	Nasser Hanna, M.D.	Study Chair
NCT00216281	Anantha Shekhar, MD, PhD	Principal Investigator
NCT00216424	Ismail Kazem, MD	Principal Investigator
NCT00216762	Clifton O. Bingham, III, MD	Principal Investigator
NCT00217152	Mark D. Stegall, M.D.	Principal Investigator
NCT00220909	Robert S Fisher, MD	Principal Investigator
NCT00225758	Gary N Schwartz, MD	Principal Investigator
NCT00226330	Galida Medical Science Director, MD	Study Director
NCT00226824	Donald S Higgins, M.D.	Principal Investigator
NCT00227032	Celeste Lindley, PharmD	Principal Investigator
NCT00227032	Frances A. Collichio, MD	Principal Investigator
NCT00227656	Morris D. Groves, MD, JD	Principal Investigator
NCT00228176	John JP Kastelein, MD	Study Chair
NCT00229710	AstraZeneca Galida Medical Science Director, MD	Study Director
NCT00229749	Mark Holodniy, M.D.	Principal Investigator
NCT00230490	Ralph T. Doyle	Study Director
NCT00232206	Brendan Curti, MD	Principal Investigator
NCT00232349	Andre Tapp, M.D.	Principal Investigator
NCT00233090	Wayne A Gordon, Ph.D.	Principal Investigator
NCT00233207	Margaret Neff, MD	Study Chair
NCT00233948	Warren Chow	Principal Investigator
NCT00234000	Gary J. Schiller, MD	Principal Investigator
NCT00235495	Myron D. Ginsberg, MD	Study Chair
NCT00235495	Michael D. Hill, MD MSc	Principal Investigator
NCT00235495	Yuko Y Palesch, PhD	Principal Investigator
NCT00235651	Shahid Husain, MD	Principal Investigator
NCT00236405	Johnson &amp; Johnson Pharmaceutical Research &amp; Development, L.L. C. Clinical Trial	Study Director
NCT00237445	Phyllis Diener	Study Director
NCT00237575	John Rinehart, MD	Study Chair
NCT00237783	Aldo J Peixoto, MD	Principal Investigator
NCT00239720	Marcus Clark, MD	Principal Investigator
NCT00240162	Ravi Vij, M.D.	Principal Investigator
NCT00240734	Johnson &amp; Johnson Pharmaceutical Research &amp; Development, L.L. C. Clinical Trial	Study Director
NCT00241371	Ravi Vij, M.D.	Principal Investigator
NCT00242827	Peter Brown	Study Director
NCT00242879	GSK Clinical Trials, MD	Study Director
NCT00243009	Brandon M. Hayes-Lattin, MD	Study Chair
NCT00243035	Darrin Beaupre	Principal Investigator
NCT00243308	Alexandra Lucas, MD	Study Director
NCT00243308	Jean-Claude Tardif, MD	Study Chair
NCT00244257	Medical Monitor	Study Director
NCT00245128	Michael Mauro, MD	Principal Investigator
NCT00245440	Jerome J Schentag, Pharm.D.	Principal Investigator
NCT00245440	Joseph Paladino, Pharm.D.	Study Director
NCT00245544	Medical Monitor	Study Director
NCT00246298	Johnson &amp; Johnson Pharmaceutical Research &amp; Development, L.L. C. Clinical Trial	Study Director
NCT00248118	Eric T. Moolchan, M.D.	Principal Investigator
NCT00248157	Novartis Pharmaceuticals	Study Director
NCT00249002	Jose Iglesias, MD	Study Director
NCT00249379	Michael F. Weaver, MD	Principal Investigator
NCT00249704	Pfizer CT.gov Call Center	Study Director
NCT00249899	Medical Director	Study Director
NCT00250861	Stephanie Williams, MD	Principal Investigator
NCT00251186	Elizabeth Poplin, MD	Principal Investigator
NCT00251589	Medical Monitor	Study Director
NCT00252239	E. Clarke Haley, Jr., M.D.	Principal Investigator
NCT00252239	John L. P. Thompson, Ph.D.	Principal Investigator
NCT00252967	Samuel D. Dudley, Jr., MD, PhD	Principal Investigator
NCT00252993	Ray Clouse, MD	Principal Investigator
NCT00253318	Stacy Moulder, MD	Principal Investigator
NCT00254618	William Aronstein, MD, PhD	Study Director
NCT00254891	Pfizer CT.gov Call Center	Study Director
NCT00254904	Pfizer CT.gov Call Center	Study Director
NCT00255333	Casey Cunningham, MD	Principal Investigator
NCT00255333	Edward Sausville, M.D., Ph.D.	Principal Investigator
NCT00255983	Roger M Echols, MD	Study Director
NCT00256295	Ignatius Ou, MD	Principal Investigator
NCT00257192	Pfizer CT.gov Call Center	Study Director
NCT00257894	Damaris Rohsenow, PhD	Principal Investigator
NCT00258258	Asher A. Chanan-Khan, MD	Principal Investigator
NCT00259714	Aldo J Peixoto, MD	Principal Investigator
NCT00260208	Novartis Pharmaceuticals	Study Director
NCT00260234	Sherwyn Schwartz, M.D.	Principal Investigator
NCT00260234	Paraic Mulgrew, M.D.	Principal Investigator
NCT00262652	Donald Tashkin, M.D.	Principal Investigator
NCT00262925	Peter Wiernik	Principal Investigator
NCT00262951	Edward W. Greeno, MD	Study Chair
NCT00263042	Eric Topol, MD	Study Chair
NCT00263042	Deepak L. Bhatt, MD	Principal Investigator
NCT00263081	Medical Director	Study Director
NCT00263198	Cynthia Ma, M.D., Ph.D.	Principal Investigator
NCT00265005	Janice E Sullivan, MD	Principal Investigator
NCT00265200	Goetz H Kloecker, MD, MSPH	Principal Investigator
NCT00265382	Pfizer CT.gov Call Center	Study Director
NCT00265616	Andrea O. Rossetti, MD	Principal Investigator
NCT00265785	Derick H. Lau, MD	Principal Investigator
NCT00265785	Rachel E. Sanborn, MD	Principal Investigator
NCT00265915	Ian W. Flinn, MD, PhD	Study Chair
NCT00266214	PPD	Study Director
NCT00267007	Johnson &amp; Johnson Pharmaceutical Research &amp; Development, L.L. C. Clinical Trial	Study Director
NCT00267267	Pfizer CT.gov Call Center	Study Director
NCT00267280	Pfizer CT.gov Call Center	Study Director
NCT00267332	Stuart A Grossman, MD	Principal Investigator
NCT00267371	Robert Sommer, MD	Principal Investigator
NCT00267371	David Dodick, MD	Principal Investigator
NCT00267553	Peter Langecker, MD, PhD	Study Director
NCT00268151	Goetz H Kloecker, MD, MSPH	Principal Investigator
NCT00268242	Anjali Advani, MD	Study Chair
NCT00268372	David J. Adelstein, MD	Study Chair
NCT00268372	Gregory T. Wolf, MD	Study Director
NCT00268372	P. G. Shankar Giri, MD, MB, BS	Study Chair
NCT00268437	Aminah Jatoi, MD	Study Chair
NCT00268463	Norman Wolmark, MD	Principal Investigator
NCT00270829	Stephen S Gottlieb	Principal Investigator
NCT00271011	Mark Zalupski, M.D.	Principal Investigator
NCT00271804	Karen Ballen, M	Principal Investigator
NCT00271947	Robert Craig, MD	Principal Investigator
NCT00272181	Wendy Cuthbert	Study Director
NCT00272870	Punam Malik, MD	Study Director
NCT00272961	Pfizer CT.gov Call Center	Study Director
NCT00273338	Howard I. Scher, MD	Study Chair
NCT00273338	Kim N. Chi, M.D.	Study Chair
NCT00273338	Ronald De-Wit, M.D.	Study Chair
NCT00274495	Douglas Meyer, M.D.	Principal Investigator
NCT00274495	Henry C. Bodenheimer, M.D.	Study Director
NCT00274651	e-mail contact via enquiries@topotarget.com	Study Director
NCT00275314	David L Paterson, MD	Principal Investigator
NCT00276159	Sarah Cooley, MD	Principal Investigator
NCT00276419	Robin L. Smith, M.D.	Principal Investigator
NCT00276861	Caio Max S. Rocha Lima, MD	Study Chair
NCT00277290	Lynne A. Bui, MD	Study Director
NCT00277303	Lynne Bui, MD	Study Director
NCT00277316	Lynne A. Bui, MD	Study Director
NCT00277329	Paul Woodard, MD	Study Director
NCT00278434	Karen Smith-McCune, MD, PhD	Study Chair
NCT00278564	Richard Burt, MD	Principal Investigator
NCT00278824	Lynn R Webster, MD	Principal Investigator
NCT00279409	Laurence L Greenhill, MD	Principal Investigator
NCT00280280	P. David Charles, MD	Principal Investigator
NCT00281021	Goetz H Kloecker, MD, MSPH	Principal Investigator
NCT00281125	Sunil Sharma, MD	Principal Investigator
NCT00281294	Mark C. Genovese, MD	Principal Investigator
NCT00281294	Jerry Molitor, MD, PhD	Principal Investigator
NCT00281294	Michael H. Schiff, MD	Principal Investigator
NCT00281294	Alan Kivitz, MD	Principal Investigator
NCT00281294	Craig Wiesenhutter, MD	Principal Investigator
NCT00281294	Justus J. Fiechtner, MD	Principal Investigator
NCT00281294	Daniel Wallace, MD	Principal Investigator
NCT00281294	Joel Kremer, MD	Principal Investigator
NCT00281294	Robert S. Katz, MD	Principal Investigator
NCT00281528	Andrew Seidman, MD	Principal Investigator
NCT00281671	John M Costello, MD	Principal Investigator
NCT00281879	Richard Maziarz, MD	Study Chair
NCT00281996	Mary Mulcahy, MD	Principal Investigator
NCT00282425	Richard Burt, MD	Principal Investigator
NCT00282581	Margaret Fischl, MD	Principal Investigator
NCT00282581	Rafael E Campo, MD	Principal Investigator
NCT00282581	Cecilia Shikuma, MD	Principal Investigator
NCT00282581	Daniel Pearce, DO	Principal Investigator
NCT00282581	Jacob Lalezari, MD	Principal Investigator
NCT00282581	Scott D Parker, MD	Principal Investigator
NCT00282763	Medical Monitor	Study Director
NCT00282971	Pfizer CT.gov Call Center	Study Director
NCT00283049	Lisa Jean-Louis	Study Director
NCT00283309	Sherwood Brown	Principal Investigator
NCT00283842	Medical Monitor	Study Director
NCT00285779	David F Fiorentino, MD, PhD	Principal Investigator
NCT00285779	David F Fiorentino, MD, PhD	Study Director
NCT00285857	James Ford, MD	Principal Investigator
NCT00286988	Donald W Lewis, MD	Principal Investigator
NCT00287066	Pfizer CT.gov Call Center	Study Director
NCT00287326	Michael J Stella, MD	Principal Investigator
NCT00288054	Yuhchyau Chen, MD, PhD	Principal Investigator
NCT00288054	Kishan J. Pandya, MD	Principal Investigator
NCT00288054	Derick H. Lau, MD	Principal Investigator
NCT00288054	Karen Kelly, MD	Principal Investigator
NCT00288054	Laurie E. Gaspar, MD, MBA	Principal Investigator
NCT00288067	Ajay Gopal	Principal Investigator
NCT00288171	Daniel I Feig, MD, PhD	Principal Investigator
NCT00288353	Tianlai Tang, M.D.	Principal Investigator
NCT00288444	John Kauh, MD	Principal Investigator
NCT00289601	Daniel I Simon, MD	Principal Investigator
NCT00290407	Roger H Herzig, MD	Principal Investigator
NCT00290537	Vassiliki Papadimitrakopoulou, M.D.	Principal Investigator
NCT00290550	Medical Monitor	Study Director
NCT00290706	Leo Gordon, MD	Principal Investigator
NCT00290719	Andrew Ko, MD	Study Chair
NCT00290771	David Reardon, Dr.	Principal Investigator
NCT00293202	George Kaysen, MD, PhD	Principal Investigator
NCT00293332	Sarita Dubey, MD	Study Chair
NCT00293371	Eric J. Small, MD	Study Chair
NCT00294372	Boehringer Ingelheim Study Coordinator	Study Chair
NCT00294541	Jonathan W Stocker, PhD	Study Director
NCT00294723	Global Clinical Registry (GCR, 1452)	Study Director
NCT00295165	Medical Monitor	Study Director
NCT00295776	Perry K. Richardson, M.D.	Principal Investigator
NCT00296062	Smitha Krishnamurthi, MD	Principal Investigator
NCT00297076	GSK Clinical Trials, Ph.D.	Study Director
NCT00298272	Medical Director	Study Director
NCT00298298	Henry E Schea	Study Director
NCT00298857	Alan Ettinger, MD	Principal Investigator
NCT00299234	Donald W Lewis, MD	Principal Investigator
NCT00299611	Wei Zhang, MD, PhD	Principal Investigator
NCT00300196	Warren Wasiewski, M.D.	Study Director
NCT00300391	Eric B Milbrandt, MD, MPH	Principal Investigator
NCT00300885	Bayer Study Director	Study Director
NCT00301080	Judith Paice, PhD, RN	Principal Investigator
NCT00301080	Jamie Von Roenn, MD	Principal Investigator
NCT00301405	Kenneth Peters, MD	Principal Investigator
NCT00301431	Medical Monitor	Study Director
NCT00301769	Farhad Ravandi-Kashani	Principal Investigator
NCT00301795	Barbara Grant	Principal Investigator
NCT00302211	Robyn J Barst, MD	Study Chair
NCT00302211	David B Badesch, MD, FACP, FCCP	Study Chair
NCT00302211	Ardeschir Ghofrani, MD	Principal Investigator
NCT00302211	Nazzareno Galie, MD	Principal Investigator
NCT00302341	Judith Aberg, MD	Principal Investigator
NCT00302341	Preston Church, MD	Principal Investigator
NCT00302341	Laurence Huang, MD	Principal Investigator
NCT00302341	Amanda Peppercorn, MD	Principal Investigator
NCT00302341	Carl Fichtenbaum, MD	Principal Investigator
NCT00302341	Kathleen Mullane, DO	Principal Investigator
NCT00302341	Jose Vazquez, MD	Principal Investigator
NCT00303303	William P Kerns, MD	Principal Investigator
NCT00303433	Michael R Privitera, MD	Principal Investigator
NCT00303615	Nathalie Johnson, MD	Principal Investigator
NCT00303628	Al Benson	Principal Investigator
NCT00303836	Steven Rosenberg	Principal Investigator
NCT00303862	Walter Stadler	Principal Investigator
NCT00303966	Wendy Stock	Principal Investigator
NCT00304200	Lynn E. Spitler, MD	Principal Investigator
NCT00304317	Manoj Monga, MD	Principal Investigator
NCT00304590	Lynne Bui, MD	Study Director
NCT00305162	Deepak L. Bhatt, MD	Principal Investigator
NCT00305162	Robert A. Harrington, MD	Principal Investigator
NCT00305162	Simona Skerjanec, PharmD	Study Director
NCT00305383	Ralph T. Doyle	Study Director
NCT00305643	Scott Kopetz, MD	Principal Investigator
NCT00306137	Bayer Study Director	Study Director
NCT00306150	Bayer Study Director	Study Director
NCT00306267	Johnson &amp; Johnson Pharmaceutical Research &amp; Development, L.L. C. Clinical Trial	Study Director
NCT00306670	Craig Kessler, MD	Principal Investigator
NCT00307723	Lawrence S. Blaszkowsky, MD	Principal Investigator
NCT00307827	Mihail Obrocea, MD	Study Director
NCT00308087	Medical Monitor	Study Director
NCT00308113	Paula R Clemens, M.D.	Study Chair
NCT00308464	Pfizer CT.gov Call Center	Study Director
NCT00308620	David R Boulware, MD, MPH	Principal Investigator
NCT00309023	Bristol-Myers Squibb	Study Director
NCT00310050	Arthur William Blackstock, MD	Study Chair
NCT00310765	Ann L Silverman, MD	Principal Investigator
NCT00311246	Nadera J. Sweiss, M.D.	Principal Investigator
NCT00311558	Ernest C. Borden, MD	Study Chair
NCT00311766	David R Crockford	Study Director
NCT00311987	Annabelle Rodriguez, MD	Principal Investigator
NCT00312286	Medical Director	Study Director
NCT00312546	David M. Margolis, MD	Principal Investigator
NCT00312650	Paul A DiSilvestro, MD	Principal Investigator
NCT00313144	Adupa Rao, MD	Principal Investigator
NCT00313196	Irina M Kline, MD	Study Director
NCT00313456	Michael Petrone, MD	Study Director
NCT00313482	Evan R Berger, MD	Principal Investigator
NCT00313534	Charles Ryan, MD	Study Chair
NCT00313612	Amy Tiersten	Principal Investigator
NCT00313768	Pfizer CT.gov Call Center	Study Director
NCT00314327	Delbert G Robinson, M.D.	Principal Investigator
NCT00314353	Norman Wolmark, MD	Principal Investigator
NCT00314457	Harshad Gurnaney, MD	Principal Investigator
NCT00314613	William H Wilson, PhD	Principal Investigator
NCT00314613	Joseph P McEvoy, MD	Principal Investigator
NCT00314938	Pfizer CT.gov Call Center	Study Director
NCT00315003	ICD CSD	Study Director
NCT00315549	ICD CSD	Study Director
NCT00315601	Keith A. Rodvold, Pharm.D.	Principal Investigator
NCT00315601	Mark H. Gotfried, M.D.	Principal Investigator
NCT00315601	Larry H. Danziger, Pharm.D.	Principal Investigator
NCT00316004	Myron L Weisfeldt, MD	Study Chair
NCT00316017	Myron L Weisfeldt, MD	Study Chair
NCT00316433	Howard (Jack) West, MD	Principal Investigator
NCT00316537	Henry Hsu, MD	Study Director
NCT00316550	Joao Siffert, MD	Study Director
NCT00316550	Kirsten Tillisch, MD	Principal Investigator
NCT00317434	Ronald D. Alvarez, MD	Principal Investigator
NCT00318214	Robert L. Rolleri, Pharm.D.	Study Director
NCT00318331	Michael DePietro, M.D.	Principal Investigator
NCT00318747	David Broide, MD	Study Chair
NCT00318747	Peter Creticos, MD	Principal Investigator
NCT00321100	Steven Cohen, MD	Principal Investigator
NCT00321308	Pfizer CT.gov Call Center	Study Director
NCT00322036	Mark Laughlin, MD	Study Director
NCT00322257	Gabriele Sonnenberg	Study Director
NCT00322673	Lynne Bui, MD	Study Director
NCT00322881	Ursula Matulonis, MD	Principal Investigator
NCT00323011	Syma Iqbal, MD	Principal Investigator
NCT00323310	Gianpaolo Pirovano, M.D.	Study Director
NCT00323362	Mika Sovak, MD, PhD	Principal Investigator
NCT00323635	Quentin R Regestein, M.D.	Principal Investigator
NCT00323778	Lisa A Mandl, MD MPH	Principal Investigator
NCT00323791	Mark Stein, MD	Principal Investigator
NCT00324025	Novartis Pharmaceuticals, MD	Study Director
NCT00324324	Joseph Bubalo, PharmD, BCPS, BCOP	Principal Investigator
NCT00324740	David Nanus	Principal Investigator
NCT00325078	Suk S De Ravin, M.D.	Principal Investigator
NCT00325455	Medical Monitor	Study Director
NCT00325650	ICD CSD	Study Director
NCT00326911	E-mail: ClinicalTrials@ ImClone.com	Study Chair
NCT00327080	Henry Masur, M.D.	Principal Investigator
NCT00328926	Medical Responsible	Study Director
NCT00329329	William Gradishar, MD	Principal Investigator
NCT00329537	Medical Monitor	Study Director
NCT00330200	Isis Pharmaceuticals	Study Chair
NCT00330564	Eric Jonasch, MD	Principal Investigator
NCT00330668	Sr Vice President, Clinical Development and Medical Affairs	Study Director
NCT00331422	Melissa A. Geller, MD	Study Chair
NCT00332085	Ryan Bradley, ND	Principal Investigator
NCT00332319	GSK Clinical Trials	Study Director
NCT00332657	Terry Wiernas, PhD	Study Director
NCT00332839	Novartis Pharmaceuticals	Study Director
NCT00332839	Novartis	Study Director
NCT00333216	Terry Wiernas, PhD	Study Director
NCT00333229	Novartis Pharmaceuticals	Study Director
NCT00333229	Novartis Pharmaceuticals	Study Director
NCT00333996	Allergan Inc.	Study Chair
NCT00334243	Marcelle I Cedars, MD	Principal Investigator
NCT00334646	GSK Clinical Trials	Study Director
NCT00334763	Jyoti D. Patel	Principal Investigator
NCT00335959	Lawrence P. Leichman, MD	Study Chair
NCT00335959	Syed A. Ahmad, MD	Study Chair
NCT00335972	Ehab Farag, MD	Principal Investigator
NCT00336700	Herb Zeh, M.D.	Principal Investigator
NCT00337272	Edward J. Stepanski, Ph.D.	Study Chair
NCT00337376	Maysa Abu-Khalaf, M.D.	Principal Investigator
NCT00337415	Medical Monitor	Study Director
NCT00338455	Scios, Inc. Clinical Trial	Study Director
NCT00338585	Mohammad Hirmand, MD	Study Director
NCT00343187	Steven Garrett, MS, DDS	Study Director
NCT00343395	Joseph B Muhlestein, MD	Principal Investigator
NCT00343655	Pfizer CT.gov Call Center	Study Director
NCT00344448	Gabor G Illei, MD, PhD, MHS	Principal Investigator
NCT00344786	Chris Storgard, MD	Study Chair
NCT00346151	Flavio Vincenti, MD	Principal Investigator
NCT00346151	Christian Larsen, MD	Principal Investigator
NCT00346229	Kimberly L. Blackwell, MD	Principal Investigator
NCT00346632	Matt Fujimori, MD	Study Director
NCT00346749	GSK Clinical Trials, MD	Study Director
NCT00346983	Oliver D. Schein, MD, MPH, MBA	Principal Investigator
NCT00347438	Olufunmilayo I Olopade, MD	Principal Investigator
NCT00348556	Horng H. Chen, M.D.	Principal Investigator
NCT00348634	Henry Parkman, MD	Study Chair
NCT00348634	William Chey, MD	Study Chair
NCT00348894	Pfizer CT.gov Call Center	Study Director
NCT00349752	UCB Clinical Trial Call Center	Study Director
NCT00350519	Johnson &amp; Johnson Pharmaceutical Research &amp; Development, L.L. C. Clinical Trial	Study Director
NCT00350623	Medical Monitor	Study Director
NCT00350844	Robert I Liem, MD	Principal Investigator
NCT00350948	Gail L. Brown, MD, MBA	Study Director
NCT00351039	George Simon, MD	Principal Investigator
NCT00351325	Bristol-Myers Squibb	Study Director
NCT00352118	Frank G. Ondrey, MD, PhD	Principal Investigator
NCT00352651	Karin L. Petersen, MD	Principal Investigator
NCT00352690	Ramaswamy Govindan, M.D.	Principal Investigator
NCT00352742	Gilad Gordon, MD	Study Director
NCT00352755	James Fleshman, M.D.	Principal Investigator
NCT00352859	Bayer Study Director	Study Director
NCT00353808	Pfizer CT.gov Call Center	Study Director
NCT00354094	Pfizer CT.gov Call Center	Study Director
NCT00354107	John Sandlund	Principal Investigator
NCT00354172	Jeffrey Miller, MD	Principal Investigator
NCT00354185	George Wilding	Principal Investigator
NCT00354419	Ann Woolfrey	Principal Investigator
NCT00354562	Helen Eliopoulos, MD	Study Director
NCT00354601	Brigitte E. Miller, MD	Study Chair
NCT00354900	Gary N Schwartz, MD	Principal Investigator
NCT00356200	Alice B Gottlieb, MD, PhD	Principal Investigator
NCT00356421	Pfizer CT.gov Call Center	Study Director
NCT00356525	Call 1-877-CTLILLY (1-877-285-4559) or 1-317-615-4559 Mon - Fri 9 AM - 5 PM Eastern time (UTC/GMT - 5 hours, EST)	Study Director
NCT00356681	MD	Study Director
NCT00356941	L. Chinsoo Cho, MD	Study Chair
NCT00358319	Adil Daud, M.D.	Principal Investigator
NCT00358397	Luis A Diaz, MD	Principal Investigator
NCT00358423	Diana V. Do, MD	Principal Investigator
NCT00358566	Ask Aabenhus, MSc. (Pharm)	Study Director
NCT00358722	Simon Roe, MB ChB	Principal Investigator
NCT00358982	Gregory Reid, MSc, MBA	Study Director
NCT00359151	Pfizer CT.gov Call Center	Study Director
NCT00359294	Nancy Lewis, MD	Principal Investigator
NCT00359424	Joseph P. Broderick, MD	Principal Investigator
NCT00359424	Thomas A. Tomsick, MD	Principal Investigator
NCT00359437	ICD CSD	Study Director
NCT00359476	Bristol-Myers Squibb	Study Director
NCT00359632	Pfizer CT.gov Call Center	Study Director
NCT00359671	Medical Monitor	Study Director
NCT00360412	David Squillacote, M.D.	Study Director
NCT00360776	Thomas Loughran	Principal Investigator
NCT00360828	Edward Pan, MD	Principal Investigator
NCT00360867	MD	Study Director
NCT00360971	David I. Rosenthal, MD	Study Chair
NCT00361088	Melissa Alsina, M.D.	Principal Investigator
NCT00361257	Ned Sacktor, MD	Study Chair
NCT00361439	Jayant M Pinto, MD	Principal Investigator
NCT00361621	Ann LaCasce, MD	Principal Investigator
NCT00361972	Kathryn Peterson, MD	Principal Investigator
NCT00362466	Bristol-Myers Squibb	Study Director
NCT00363636	Medical Director	Study Director
NCT00363779	Thomas Waldmann, M.D.	Principal Investigator
NCT00363883	David Quinn, MD	Principal Investigator
NCT00364364	Richard Wahl, MD	Principal Investigator
NCT00364533	Johnson &amp; Johnson Pharmaceutical Research &amp; Development, L.L. C. Clinical Trial	Study Director
NCT00365183	Martin Edelman, MD	Study Chair
NCT00365222	Marc Chamberlain, MD	Principal Investigator
NCT00365274	Michelle Fanale, MD	Principal Investigator
NCT00365820	Novartis Pharma AG	Study Chair
NCT00366106	Johnetta Blakely, MD	Principal Investigator
NCT00366301	Paul M Ridker, MD, MPH	Study Chair
NCT00366301	Aruna Das Pradhan, MD, MPH	Principal Investigator
NCT00366327	Medical Monitor	Study Director
NCT00366704	Medical Monitor	Study Director
NCT00366795	ICD CSD	Study Director
NCT00367692	Medical Monitor	Study Director
NCT00367783	Pfizer CT.gov Call Center	Study Director
NCT00368017	Alp Ikizler, MD	Principal Investigator
NCT00368329	Daniel T Chang	Principal Investigator
NCT00368602	Rivkah R Isseroff, MD	Principal Investigator
NCT00368641	Baxter Healthcare Corporation	Study Chair
NCT00369200	Patricia LoRusso	Principal Investigator
NCT00369265	Robert T Sataloff, MD, DMA	Principal Investigator
NCT00369395	Mihail Obrocea, MD	Study Director
NCT00369551	Everett Vokes	Principal Investigator
NCT00369603	Jeffrey N Browndyke, PhD	Principal Investigator
NCT00369603	Roberto Cabeza, PhD	Principal Investigator
NCT00369603	James R Burke, PhD	Principal Investigator
NCT00369603	Kathleen Welsh-Bohmer, PhD	Principal Investigator
NCT00369629	Timothy M. Kuzel, MD	Principal Investigator
NCT00369915	Maura L Furey, Ph.D.	Principal Investigator
NCT00372073	Chandra Belani, M.D.	Study Chair
NCT00372489	Vice President, Clinical Development	Study Director
NCT00372567	Pfizer CT.gov Call Center	Study Director
NCT00372996	Pfizer CT.gov Call Center	Study Director
NCT00373113	Pfizer CT.gov Call Center	Study Director
NCT00373204	Kishan Pandya, MD	Study Chair
NCT00373217	Craig L Slingluff, MD	Study Director
NCT00373581	Margaret Haney, Ph.D.	Principal Investigator
NCT00373789	Linda Brubaker, MD	Study Chair
NCT00374296	Gregory Reid, MSc, MBA	Study Director
NCT00374543	Naomi M. Simon, M.D.	Principal Investigator
NCT00375401	Pfizer CT.gov Call Center	Study Director
NCT00376103	Allen K Sills, MD	Principal Investigator
NCT00376181	VP Clinical Science Strategy	Study Director
NCT00376519	Claudio G. Brunstein, MD, PhD	Principal Investigator
NCT00376805	Jeffrey Miller, MD	Study Chair
NCT00376805	Sarah Cooley, MD	Principal Investigator
NCT00377104	Leslie Andritsos	Principal Investigator
NCT00377247	Jonas T Johnson, M.D.	Principal Investigator
NCT00377455	Virginia D Steen, MD	Principal Investigator
NCT00378573	Phyllis Diener, BS, MT (ASCP)	Study Director
NCT00379197	Douglas Yee, MD	Principal Investigator
NCT00379860	Medical Monitor	Study Director
NCT00379912	Larry Cripe, M.D.	Study Chair
NCT00380198	Robert Mittleman, MD	Study Director
NCT00380276	Mark Laughlin, MD	Study Director
NCT00380874	Pfizer CT.gov Call Center	Study Director
NCT00381095	Pfizer CT.gov Call Center	Study Director
NCT00381602	Graeme R Boniface	Study Director
NCT00381654	Manuel Hidalgo, MD, PhD	Principal Investigator
NCT00381654	Justina L Martinez, MD	Principal Investigator
NCT00381654	Carmen S. Puparelli, MD	Principal Investigator
NCT00381654	Belén R. Viquiera, M.D.	Principal Investigator
NCT00381693	Ruben A. Mesa, MD	Study Chair
NCT00381810	Paul Brunetta, M.D.	Study Director
NCT00382863	William T. Abraham, MD	Principal Investigator
NCT00383071	H. Clifford Lane, M.D.	Principal Investigator
NCT00383214	Anna Barry	Study Director
NCT00383266	Maria Q. Baggstrom, M.D.	Principal Investigator
NCT00383331	Call 1-877-CTLILLY (1-877-285-4559) or 1-317-615-4559 Mon - Fri 9 AM - 5 PM Eastern time (UTC/GMT - 5 hours, EST)	Study Director
NCT00383487	Dr. Sandy Srinivas	Principal Investigator
NCT00383565	Jorge Romaguera	Principal Investigator
NCT00383630	Yoshifumi Naka, MD	Principal Investigator
NCT00383942	Scott Graziano, MD	Principal Investigator
NCT00384111	Igor Gorbatchevsky, M.D.	Study Director
NCT00384150	Medical Director	Study Director
NCT00384293	Medical Monitor	Study Director
NCT00384371	Jack W Tsao, MD	Principal Investigator
NCT00384527	Carol Kauffman, MD	Principal Investigator
NCT00384527	Adam Bressler, MD	Principal Investigator
NCT00384527	Wesley Bray, MD	Principal Investigator
NCT00384527	James Grendell, MD	Principal Investigator
NCT00384527	Bradley Allen, MD	Principal Investigator
NCT00384527	Partha Nandi, MD	Principal Investigator
NCT00384527	Daniel Musher, MD	Principal Investigator
NCT00384527	Julia Garcia-Diaz, MD	Principal Investigator
NCT00384527	David Rand, MD	Principal Investigator
NCT00384527	David Johnson, MD	Principal Investigator
NCT00384579	Jack W Tsao, MD	Principal Investigator
NCT00384605	Medical Monitor	Study Director
NCT00384865	Steven M Kawut, MD, MS	Principal Investigator
NCT00384865	David J Lederer, MD, MS	Principal Investigator
NCT00384865	Reda E Girgis, MB, BCh	Principal Investigator
NCT00384865	Kari E Roberts, MD	Principal Investigator
NCT00385021	Petra Ketterl, MD	Principal Investigator
NCT00385138	Simona Skerjanec, PharmD	Study Director
NCT00385138	Deepak L. Bhatt, MD	Principal Investigator
NCT00385138	Robert A. Harrington, MD	Principal Investigator
NCT00385450	Andrew D. Badley, M.D.	Principal Investigator
NCT00385827	Centocor, Inc. Clinical Trial	Study Director
NCT00386152	Johnson &amp; Johnson Pharmaceutical Research &amp; Development, L.L. C. Clinical Trial	Study Director
NCT00387153	Richard Wenstrup, MD	Study Director
NCT00387348	William F. Pirl, MD	Study Chair
NCT00387426	Srdan Verstovsek	Principal Investigator
NCT00387686	Pfizer CT.gov Call Center	Study Director
NCT00387738	Eduardo Martins, MD, DPhil	Study Director
NCT00387894	Michael D. Prados, MD	Principal Investigator
NCT00388609	Bristol-Myers Squibb	Study Director
NCT00388804	Andrew K. Lee, MD	Principal Investigator
NCT00389090	Jennifer Quinn, MD	Study Chair
NCT00389688	Paul Germonpre, MD	Study Chair
NCT00390364	Manuel Hidalgo, MD, PhD	Principal Investigator
NCT00390975	Novartis Pharmaceutical Corporation	Study Chair
NCT00391001	Jean Frazier, MD	Principal Investigator
NCT00391066	Medical Director	Study Director
NCT00391196	Pfizer CT.gov Call Center	Study Director
NCT00391586	Dennie V Jones, MD	Principal Investigator
NCT00391755	Patricia J Shipley, MD	Principal Investigator
NCT00393094	Howard A Fine, M.D.	Principal Investigator
NCT00393380	Karen K. Ballen, MD	Principal Investigator
NCT00393380	Joseph Antin, MD	Principal Investigator
NCT00393380	David Avigan, MD	Principal Investigator
NCT00393380	Elizabeth J Shpall, MD	Principal Investigator
NCT00393380	Colleen Delaney, MD	Principal Investigator
NCT00393380	Ram Kamble, MD	Principal Investigator
NCT00393380	Katarzyna Jamieson, M.D.	Principal Investigator
NCT00393380	Philip McCarthy, M.D.	Principal Investigator
NCT00393380	Edward Ball, M.D.	Principal Investigator
NCT00393380	Richard Maziarz, M.D.	Principal Investigator
NCT00393796	Maha H. Hussain, M.D.	Principal Investigator
NCT00394147	Ranee Mehra, MD	Principal Investigator
NCT00394316	Elizabeth M Kang, M.D.	Principal Investigator
NCT00395057	Medical Director	Study Director
NCT00395161	Joseph Carcillo, MD	Principal Investigator
NCT00395967	Medical Monitor	Study Director
NCT00396214	Global Clinical Director Solvay	Study Director
NCT00396448	Pfizer CT.gov Call Center	Study Director
NCT00396812	Christopher Striebich, MD, PhD	Study Chair
NCT00396812	Robert D. D'Ambrosia, MD	Principal Investigator
NCT00396955	Medical Monitor	Study Director
NCT00396955	Trial Manager	Principal Investigator
NCT00396955	Trial Manager	Principal Investigator
NCT00396955	Trial Manager	Principal Investigator
NCT00396955	Trial Manager	Principal Investigator
NCT00396955	Trial Manager	Principal Investigator
NCT00396955	Trial Manager	Principal Investigator
NCT00396955	Trial Manager	Principal Investigator
NCT00396955	Trial Manager	Principal Investigator
NCT00396955	Trial Manager	Principal Investigator
NCT00397358	Baxter Healthcare Corporation	Study Director
NCT00397657	Allen J Taylor, MD	Principal Investigator
NCT00397683	Medical Monitor	Study Director
NCT00397878	Cathy Eng	Principal Investigator
NCT00398632	Lorrin M Koran	Principal Investigator
NCT00399659	Novartis Pharmaceuticals Corp.	Study Chair
NCT00400205	Nabil Saba, MD	Principal Investigator
NCT00400764	Chia Portera, PhD., M.D	Study Director
NCT00401310	Medical Monitor	Study Director
NCT00401401	Vincent Gregoire, MD professor	Principal Investigator
NCT00401882	David E Haines, MD	Principal Investigator
NCT00401921	Robert Friedlander, MD	Principal Investigator
NCT00401947	John Pottage, MD	Study Director
NCT00401960	Kyu Y Rhee, MD, PhD	Principal Investigator
NCT00402415	Mario Sznol, M.D.	Principal Investigator
NCT00402662	Mario Sznol, M.D.	Principal Investigator
NCT00402883	David Spigel, MD	Principal Investigator
NCT00402896	Carlos Jimenez, M.D.	Principal Investigator
NCT00403052	Eduardo Martins, MD, DPhil	Study Director
NCT00404313	Medical Monitor	Study Director
NCT00404521	Mark Ratain, MD	Principal Investigator
NCT00405054	Medical Monitor	Study Director
NCT00406276	Suresh Ramalingam, MD	Principal Investigator
NCT00406419	Wolfgang Dummer, M.D.	Study Director
NCT00406575	Thomas Dschietzig, MD	Principal Investigator
NCT00406653	Bristol-Myers Squibb	Study Director
NCT00406874	David R Meldrum, M.D.	Principal Investigator
NCT00407407	Robert Coleman, MD	Principal Investigator
NCT00408070	Carolyn Runowicz, MD	Principal Investigator
NCT00408967	Jean Henslee-Downey	Study Chair
NCT00409331	Mark Chambers, MD	Principal Investigator
NCT00409344	Ulrich Schmidt, MD,PhD	Principal Investigator
NCT00409526	Michael D Schreiber, MD	Principal Investigator
NCT00409695	Amin M. Alousi, MD	Principal Investigator
NCT00410150	Derek S Wheeler, M.D.	Principal Investigator
NCT00410566	Medical Monitor	Study Director
NCT00410774	Andrew Ko, MD	Study Chair
NCT00411801	Wolfgang Frenzel, M.D.	Study Director
NCT00411892	Theresa Brennan	Study Director
NCT00412620	Beatrice Rendenbach-Mueller, PhD	Study Director
NCT00413478	Zeev Estrov, MD	Principal Investigator
NCT00413959	Chadi Nabhan, MD	Principal Investigator
NCT00414024	Novartis Pharmaceuticals Corp.	Principal Investigator
NCT00414037	Martin P Paulus, M.D.	Principal Investigator
NCT00414206	Carl Grove	Study Director
NCT00414284	Calvin J Cohen, MD, MSc	Principal Investigator
NCT00414453	Robert H. Dworkin, PhD	Principal Investigator
NCT00414726	Aneesh B Singhal, MD	Principal Investigator
NCT00415311	Alison Freifeld, MD	Principal Investigator
NCT00415857	Jorge E. Cortes, MD	Principal Investigator
NCT00415909	Jorge E. Cortes, MD	Principal Investigator
NCT00417248	Nasser Hanna, M.D.	Study Chair
NCT00417677	Medical Monitor	Study Director
NCT00417690	David P. Jacobus, MD	Study Chair
NCT00417690	Kathy L. Ales, MD	Study Director
NCT00417690	Daniel Present, MD	Principal Investigator
NCT00417690	Stephen B. Hanauer, MD	Principal Investigator
NCT00417690	John Hanson, MD	Principal Investigator
NCT00417690	Iris Dotan, MD	Principal Investigator
NCT00417690	Rami Eliakim, MD	Principal Investigator
NCT00417885	Pfizer CT.gov Call Center	Study Director
NCT00418093	Neil Horowitz, MD	Principal Investigator
NCT00418574	Jacobus Pfisterer, MD	Study Chair
NCT00418574	Paul Sabbatini, MD	Principal Investigator
NCT00418574	Jonathan Berek, MD	Principal Investigator
NCT00418574	Giovanni Scambia, MD	Principal Investigator
NCT00418574	Antonio Casado, MD	Principal Investigator
NCT00418574	Anna Pluzanska, MD	Principal Investigator
NCT00418574	Karel Cwiertka, MD	Principal Investigator
NCT00418574	Tamás Pintér, MD	Principal Investigator
NCT00418574	Eric Pujade-Lauraine, MD	Principal Investigator
NCT00418678	Ralph Boccia, M.D.	Principal Investigator
NCT00418782	Pfizer CT.gov Call Center	Study Director
NCT00419081	Auro del Giglio, MD	Principal Investigator
NCT00419081	Belinda Pinto Simoes, MD	Principal Investigator
NCT00419081	Carlos Sergio Chiattone, MD	Principal Investigator
NCT00419081	Carmino Antonio de Souza, MD	Principal Investigator
NCT00419081	David Barqueti Jendiroba, MD	Principal Investigator
NCT00419081	Ernesto de Meis, MD	Principal Investigator
NCT00419081	Fernando Antonio Sellos Ribeiro, MD	Principal Investigator
NCT00419081	Ines Guterres, MD	Principal Investigator
NCT00419081	Johnny Francisco Cordeiro Camargo, MD	Principal Investigator
NCT00419081	Jose Salvador Rodrigues Oliveira, MD	Principal Investigator
NCT00419081	Lucia Mariano da Rocha Silla, MD	Principal Investigator
NCT00419081	Mair Pedro de Souza, MD	Principal Investigator
NCT00419081	Maria Aparecida Zanichelli, MD	Principal Investigator
NCT00419081	Maria Lucia de Martino Lee, MD	Principal Investigator
NCT00419081	Ricardo Pasquini, MD	Principal Investigator
NCT00419081	Nicholas Novitzky, MD	Principal Investigator
NCT00419081	Vernon Louw, MD	Principal Investigator
NCT00419081	Farhad Ravandi, MD	Principal Investigator
NCT00419081	Karen Seiter, MD	Principal Investigator
NCT00419081	Francesco Turturro, MD	Principal Investigator
NCT00419081	Luis Isola, MD	Principal Investigator
NCT00419081	Wendy Stock, MD	Principal Investigator
NCT00419081	Francisco Gonzalez, MD	Principal Investigator
NCT00419081	James Foran, MD	Principal Investigator
NCT00419081	Ellen Ritchie, MD	Principal Investigator
NCT00419081	Leonard Heffner, MD	Principal Investigator
NCT00419081	Madan Jagasia, MD	Principal Investigator
NCT00419081	Katarzyna Jamieson, MD	Principal Investigator
NCT00419081	Gary Schiller, MD	Principal Investigator
NCT00419081	Anjali Advani, MD	Principal Investigator
NCT00419081	Kellie Sprague, MD	Principal Investigator
NCT00419081	Tanya Trippett, MD	Principal Investigator
NCT00419081	Meir Wetzler, MD	Principal Investigator
NCT00419081	Alexander Gaiger, MD	Principal Investigator
NCT00419081	Werner Linkersch, MD	Principal Investigator
NCT00419081	David Nachbaur, MD	Principal Investigator
NCT00419081	Agnes Buzin, MD	Principal Investigator
NCT00419081	Stephane de Botton, MD	Principal Investigator
NCT00419081	Jacques Delaunnay, MD	Principal Investigator
NCT00419081	Herve Dombret, MD	Principal Investigator
NCT00419081	Francoise Huguet-Rigal, MD	Principal Investigator
NCT00419081	Norbert Ifrah, MD	Principal Investigator
NCT00419081	Arnaud Pigneux, MD	Principal Investigator
NCT00419081	Bruno Quesnel, MD	Principal Investigator
NCT00419081	Houmedaly Reman, MD	Principal Investigator
NCT00419081	Xavier Thomas, MD	Principal Investigator
NCT00419081	Norbert Vey, MD	Principal Investigator
NCT00419081	Francis Witz, MD	Principal Investigator
NCT00419081	Genadi Iosava, MD	Principal Investigator
NCT00419081	Mamia Zodelava, MD	Principal Investigator
NCT00419081	Reinhard Andreesen, MD	Principal Investigator
NCT00419081	Walter Aulitzky, MD	Principal Investigator
NCT00419081	Ulrich Duehrsen, MD	Principal Investigator
NCT00419081	Gerhard Ehninger, MD	Principal Investigator
NCT00419081	Arnold Ganser, MD	Principal Investigator
NCT00419081	R. Haas, MD	Principal Investigator
NCT00419081	Dieter Hoelzer, MD	Principal Investigator
NCT00419081	W-D Ludwig, MD	Principal Investigator
NCT00419081	Deiter Niederwieser, MD	Principal Investigator
NCT00419081	Michael Pfreunschuh, MD	Principal Investigator
NCT00419081	Mathias Schmid, MD	Principal Investigator
NCT00419081	Norbert Schmitz, MD	Principal Investigator
NCT00419081	Peter Staib, MD	Principal Investigator
NCT00419081	Matthias Stelljes, MD	Principal Investigator
NCT00419081	Michele Baccarani, MD	Principal Investigator
NCT00419081	Renato Bassan, MD	Principal Investigator
NCT00419081	Alberto Bosi, MD	Principal Investigator
NCT00419081	Felicetto Ferrara, MD	Principal Investigator
NCT00419081	Roberto Foa, MD	Principal Investigator
NCT00419081	Eugenio Gallo, MD	Principal Investigator
NCT00419081	Vincenzo Liso, MD	Principal Investigator
NCT00419081	Salvatore Mirto, MD	Principal Investigator
NCT00419081	Enrica Morra, MD	Principal Investigator
NCT00419081	Enrico Pogliani, MD	Principal Investigator
NCT00419081	Bob Lowenberg, MD	Principal Investigator
NCT00419081	Jerzy Holowiecki, MD	Principal Investigator
NCT00419081	Wieslaw Jedrzejczak, MD	Principal Investigator
NCT00419081	Kazimierz Kuliczkowski, MD	Principal Investigator
NCT00419081	Tadeusz Robak, MD	Principal Investigator
NCT00419081	Aleksander Skotnicki, MD	Principal Investigator
NCT00419081	K. Abdulkadyrov, MD	Principal Investigator
NCT00419081	Anatoli Golenkov, MD	Principal Investigator
NCT00419081	S. Moiseev, MD	Principal Investigator
NCT00419081	Valerie Savchenko, MD	Principal Investigator
NCT00419081	J. Ribera, MD	Principal Investigator
NCT00419120	Sunita Sheth, MD	Study Director
NCT00420355	R. Chris Rathbun, Pharm.D.	Principal Investigator
NCT00420589	Medical Monitor	Study Director
NCT00420706	Medical Monitor	Study Director
NCT00420732	Charles J. Link, Jr., M.D.	Study Chair
NCT00420810	Medical Monitor	Study Director
NCT00422201	Lynnette K Nieman, M.D.	Principal Investigator
NCT00422513	Clinical Trials	Study Director
NCT00423189	David M Brown, M.D.	Principal Investigator
NCT00423683	Myra Barginear, MD	Principal Investigator
NCT00423683	Daniel R. Budman, MD	Principal Investigator
NCT00424138	Wolfgang Weber, MD	Study Chair
NCT00424138	Denise R. Aberle, MD	Study Chair
NCT00424138	Barry A. Siegel, MD	Study Chair
NCT00424138	Anthony F. Shields, MD, PhD	Study Chair
NCT00424138	Karen Rickard	Study Chair
NCT00424138	Ramaswamy Govindan, MD	Study Chair
NCT00424138	Steven M. Dubinett, MD	Study Chair
NCT00424138	Joel Karp, PhD	Study Chair
NCT00424294	Pfizer CT.gov Call Center	Study Director
NCT00424424	Medical Monitor	Study Director
NCT00424645	Saroj Vadhan-Raj, MD	Principal Investigator
NCT00424749	Fernando C. Fervenza, M.D., Ph.D.	Principal Investigator
NCT00425919	Medical Monitor	Study Director
NCT00425919	Trial Manager	Principal Investigator
NCT00425919	Trial Manager	Principal Investigator
NCT00425919	Trial Manager	Principal Investigator
NCT00425919	Trial Manager	Principal Investigator
NCT00425919	Trial Manager	Principal Investigator
NCT00425919	Trial Manager	Principal Investigator
NCT00425919	Trial Manager	Principal Investigator
NCT00425919	Trial Manager	Principal Investigator
NCT00425919	Trial Manager	Principal Investigator
NCT00425919	Trial Manager	Principal Investigator
NCT00425919	Trial Manager	Principal Investigator
NCT00425919	Trial Manager	Principal Investigator
NCT00425919	Trial Manager	Principal Investigator
NCT00425919	Trial Manager	Principal Investigator
NCT00425919	Trial Manager	Principal Investigator
NCT00425919	Trial Manager	Principal Investigator
NCT00425919	Trial Manager	Principal Investigator
NCT00425919	Trial Manager	Principal Investigator
NCT00426127	Daniel J. Berg, MD	Principal Investigator
NCT00426829	Sunil Krishnan, MD	Principal Investigator
NCT00426985	PPD	Study Director
NCT00427011	David Squillacote, MD	Study Director
NCT00427102	Gopal Bajaj, M.D.	Principal Investigator
NCT00427154	Yizhen Xu, M.D., Ph.D.	Study Director
NCT00427297	Grace C John-Stewart, MD, PhD	Principal Investigator
NCT00427297	Dalton Wamalwa, MMed, MPH	Principal Investigator
NCT00427414	Juan Carlos Ramos, MD	Study Chair
NCT00427414	Dirk Dittmer, PhD	Study Chair
NCT00427414	Tamara Newman Lobato Souza	Principal Investigator
NCT00427414	Luis Carlos Pereira, MD	Principal Investigator
NCT00427427	Helena R Chang, M.D, Ph.D.	Principal Investigator
NCT00427609	Elias Rosenberg, MD	Principal Investigator
NCT00427648	Frank F. Tu, MD, MPH	Principal Investigator
NCT00427674	John P Seibyl, MD	Principal Investigator
NCT00427934	Pfizer CT.gov Call Center	Study Director
NCT00427973	Andrew Zhu	Principal Investigator
NCT00428077	Michael Deininger, MD, PhD	Study Chair
NCT00428272	Crystal L Mackall, M.D.	Principal Investigator
NCT00428597	Pfizer CT.gov Call Center	Study Director
NCT00429403	Naoto Ueno, MD, PhD	Principal Investigator
NCT00429702	Haydar Frangoul, MD	Study Chair
NCT00429858	Andrew Ko, MD	Study Chair
NCT00430014	Razelle Kurzrock, MD	Principal Investigator
NCT00430300	Pfizer CT.gov Call Center	Study Director
NCT00430443	Gary Jacob, Ph.D.	Study Director
NCT00430677	Bristol-Myers Squibb	Study Director
NCT00430716	Pfizer CT.gov Call Center	Study Director
NCT00430742	Medical Monitor	Study Director
NCT00431626	Kevin T. McVary, MD	Principal Investigator
NCT00433043	Marrick L Kukin, MD	Principal Investigator
NCT00433953	Alexander A. Vinks, Pharm.D., Ph.D.	Principal Investigator
NCT00434226	Julie Hambleton, M.D.	Study Director
NCT00434278	Michelle Freemer, M.D.	Study Director
NCT00434356	Jai Balkissoon, M.D.	Study Director
NCT00434993	Michael A. Matthay, MD	Principal Investigator
NCT00434993	Roy Brower, MD	Study Chair
NCT00435578	Gerold Bepler, MD, PhD	Principal Investigator
NCT00435578	John C Ruckdeschel, MD	Principal Investigator
NCT00435578	Peter D Eisenberg, MD	Principal Investigator
NCT00436579	Michael Maitland	Principal Investigator
NCT00436748	MD	Study Director
NCT00437034	Ruben Niesvizky-Iszaevich	Principal Investigator
NCT00437073	GSK Clinical Trials	Study Director
NCT00437164	GSK Clinical Trials	Study Director
NCT00437203	Pfizer CT.gov Call Center	Study Director
NCT00437294	Call 1-877-CTLILLY (1-877-285-4559) or 1-317-615-4559 Mon-Fri 9 AM - 5 PM Eastern time (UTC/GMT - 5 hours, EST)	Study Director
NCT00437398	Yogish C. Kudva, M.B.B.S.	Principal Investigator
NCT00437489	Pfizer CT.gov Call Center	Study Director
NCT00437671	Kumar Alagappan, MD	Principal Investigator
NCT00437957	Sajeel Chowdhary, MD	Principal Investigator
NCT00437957	Jade Homsi, MD	Principal Investigator
NCT00438204	Antoinette J. Wozniak, MD	Principal Investigator
NCT00439140	Medical Director	Study Director
NCT00439218	René Gonin, PhD	Principal Investigator
NCT00439218	Peter R Gilbert, ScM	Study Director
NCT00439296	Paul S Gaynon, MD	Study Chair
NCT00439374	William Grobman, MD, MBA	Principal Investigator
NCT00439569	René Gonin, PhD	Principal Investigator
NCT00439569	Peter R. Gilbert, ScM	Study Director
NCT00439634	ICD CSD	Study Director
NCT00439946	Remzi Bag, MD	Principal Investigator
NCT00439946	Evelyn Horn, MD	Principal Investigator
NCT00439946	Teresa DeMarco, MD	Principal Investigator
NCT00439959	GSK Clinical Trials	Study Director
NCT00440180	Ahmad O Hammoud, MD	Principal Investigator
NCT00440271	Boehringer Ingelheim	Study Chair
NCT00440973	Robert J. Amato, D.O.	Principal Investigator
[truncated: 3,722 more rows]
