# Supplementary material for: Some data quality issues at ClinicalTrials.gov
Source: Trials. 2019 Jun 24;20:378. doi: 10.1186/s13063-019-3408-2 (PMC6591874; doi:10.1186/s13063-019-3408-2)
Supplement: Supplementary file 13 — Data with real persons. The data (71,359 records from Additional file 12: Table S10) were sorted into a “Person” sheet with the records that had the names of real people in the “Last name” field, and a “NonPerson” sheet with the remaining junk records. The data are presented in the following six Recruitment Type categories: (1) Active, not recruiting (4112 selected records with 693 leftovers), (2) Completed (17,081; 7054), (3) Enrolling by invitation (190; 11), (4) Recruiting (35,447; 1801), (5) Suspended (206; 8), and (6) Terminated (3751; 1005). The sheets for these categories are numbered 1–6, respectively. (XLS 5690 kb) [file 13063_2019_3408_MOESM13_ESM.xls]

## Sheet: S11 Table_Legend
S11 Table. Data with real persons. The data (71,359 records from S10 Table) was sorted into a 'Person' sheet with the records that had the names of real people in the 'Last name' field, and a 'NonPerson' sheet with the remaining junk records. The data is presented in the following six Recruitment Type categories: (1) Active, not recruiting (4,112 selected records with 693 leftovers), (2) Complete…

## Sheet: 1_Active_Person
NCT ID	Last name	Role
NCT00045968	Linda Liau, M.D.	Principal Investigator
NCT00045968	Marnix L. Bosch, MBA, PhD	Study Director
NCT00062868	Helen E Heslop, MD	Principal Investigator
NCT00072982	Robert B Zurier, MD	Principal Investigator
NCT00079417	Debra Friedman, MD	Principal Investigator
NCT00081263	Janet Rader	Principal Investigator
NCT00083083	Mitchell Machtay, MD	Study Chair
NCT00085098	Jeffrey C. Allen, MD	Study Chair
NCT00098787	Jean L. Grem, MD	Study Chair
NCT00098787	Neal J. Meropol, MD	Study Chair
NCT00098839	Elizabeth Raetz, MD	Principal Investigator
NCT00099086	David Marshall, MD	Principal Investigator
NCT00100061	Lynn Stothers, MD	Principal Investigator
NCT00100802	Regina Jakacki, MD	Study Chair
NCT00102908	Jeannie S. Huang, MD, MPH	Principal Investigator
NCT00103285	Kelly Maloney, MD	Principal Investigator
NCT00104923	Ann Mohrbacher, MD	Study Chair
NCT00108745	Larry Copeland	Principal Investigator
NCT00114140	Barbara J. Fisher, MD	Principal Investigator
NCT00114140	David R. Macdonald, MD, FRCPC	Study Chair
NCT00114140	Glenn J. Lesser, MD	Study Chair
NCT00114140	Stephen W. Coons, MD	Study Chair
NCT00114231	Julio Garcia-Aguilar, MD, PhD	Study Chair
NCT00114738	Wyndham H Wilson, M.D.	Principal Investigator
NCT00115778	Selim M Arcasoy, M.D.	Principal Investigator
NCT00116142	Anthony V. D'Amico, MD, PhD	Principal Investigator
NCT00117936	Nabil Dib, MD	Principal Investigator
NCT00118209	Andrew D. Zelenetz, MD, PhD	Study Chair
NCT00118209	Wyndham H. Wilson, MD, PhD	Study Chair
NCT00118274	Craig L. Slingluff, MD	Principal Investigator
NCT00118352	Brenda Sandmaier	Principal Investigator
NCT00121251	Scott Tagawa	Principal Investigator
NCT00122005	Bernard Fox, PhD	Principal Investigator
NCT00126581	Pasi Janne	Principal Investigator
NCT00126672	Sandra Dabora, MD, PhD	Study Chair
NCT00127205	Alexander H Paterson, MD, FRCP	Study Chair
NCT00127205	Carla I. Falkson, MD	Study Chair
NCT00127205	Elizabeth C. Dees, MD	Study Chair
NCT00127205	James N. Ingle, MD	Study Chair
NCT00127205	Julie R. Gralow, MD	Study Chair
NCT00127205	Mark J. Clemons, MD	Study Chair
NCT00127205	Robert B. Livingston, MD	Study Chair
NCT00129740	Jorge Cortes, MD	Principal Investigator
NCT00130117	Christos S Mantzoros, MD, ScD	Principal Investigator
NCT00132301	Bruce Montgomery, MD	Study Chair
NCT00132301	Daniel Lin	Study Chair
NCT00132743	Don Cutlip, MD	Principal Investigator
NCT00132743	Timothy Murphy, MD	Principal Investigator
NCT00134030	Neyssa Marina, MD	Principal Investigator
NCT00134056	David I. Quinn, MD	Study Chair
NCT00134056	Maha Hadi A. Hussain, MD	Study Chair
NCT00134056	Mark Garzotto, MD	Study Chair
NCT00134056	Primo N. Lara, MD	Study Chair
NCT00134082	Richard Ambinder, MD	Study Chair
NCT00135200	Mark Kaminski, MD	Principal Investigator
NCT00142519	Natalia Moryl, MD	Principal Investigator
NCT00147914	Jacquelynne Corey, M.D.	Principal Investigator
NCT00151203	Ruben Niesvizky, MD	Principal Investigator
NCT00154180	Dennis M Black, PhD	Principal Investigator
NCT00154180	Frederick Naftolin, MD, PhD	Study Director
NCT00154180	Howard Hodis, MD	Principal Investigator
NCT00154180	Matthew Budoff, MD	Principal Investigator
NCT00154180	Michael Mendelsohn, MD	Principal Investigator
NCT00154180	S Mitchell Harman, MD, PhD	Study Director
NCT00154180	Sanjay Asthana, MD	Principal Investigator
NCT00174525	Daniel E. Grosz, MD	Principal Investigator
NCT00175123	Bettina Jorgensen, MD	Principal Investigator
NCT00179998	Robert G Castile, MD	Principal Investigator
NCT00182715	Timothy Maughan, MD	Study Chair
NCT00183872	Syma Iqbal, M.D.	Principal Investigator
NCT00184015	David Quinn, MD, PhD	Principal Investigator
NCT00185731	Dean Felsher	Principal Investigator
NCT00186888	Ibrahim Qaddoumi, M.D.	Principal Investigator
NCT00195624	Danielle M Townsley, M.D.	Principal Investigator
NCT00200161	Lisa DeAngelis, M.D	Principal Investigator
NCT00201760	Kari Kendra, MD	Principal Investigator
NCT00203411	Arash Naeim, MD, PhD	Study Chair
NCT00203411	Randy Hecht, MD	Study Chair
NCT00205504	John E Nestler, M.D.	Study Director
NCT00205504	Kai I Cheang, Pharm.D.	Principal Investigator
NCT00214747	Kurt Barnhart, MD	Principal Investigator
NCT00214838	Donald Picker, PhD	Study Director
NCT00216242	Nancy Bouveret, MD	Study Director
NCT00217594	Christopher S Hourigan, M.D.	Principal Investigator
NCT00217737	Al Benson	Principal Investigator
NCT00217763	Pr. Bruno Vellas	Principal Investigator
NCT00225537	Anastacio M Hoyumpa, Prof. M.D.	Principal Investigator
NCT00225537	Charles T Leach, Prof. M.D.	Principal Investigator
NCT00225537	Dubravko Pavlin, PhD	Study Director
NCT00227019	Heather A. Wakelee	Principal Investigator
NCT00227461	A.M. Barrett, MD	Principal Investigator
NCT00227617	Emily K. Bergsland, MD	Principal Investigator
NCT00232505	Lisa A. Carey, MD	Principal Investigator
NCT00233324	Abbot R. Laptook, MD	Principal Investigator
NCT00233324	Abhik Das, PhD	Principal Investigator
NCT00233324	Barbara J. Stoll, MD	Principal Investigator
NCT00233324	Brenda B. Poindexter, MD MS	Principal Investigator
NCT00233324	Edward F. Bell, MD	Principal Investigator
NCT00233324	Ivan D. Frantz III, MD	Principal Investigator
NCT00233324	Kathleen A. Kennedy, MD MPH	Principal Investigator
NCT00233324	Krisa P. Van Meurs, MD	Principal Investigator
NCT00233324	Kristi L. Watterberg, MD	Principal Investigator
NCT00233324	Kurt Schibler, MD	Principal Investigator
NCT00233324	Michele C. Walsh, MD MS	Principal Investigator
NCT00233324	Neil N. Finer, MD	Principal Investigator
NCT00233324	Pablo J. Sanchez, MD	Principal Investigator
NCT00233324	Richard A. Ehrenkranz, MD	Principal Investigator
NCT00233324	Roger G. Faix, MD	Principal Investigator
NCT00233324	Ronald N. Goldberg, MD	Principal Investigator
NCT00233324	Seetha Shankaran, MD	Principal Investigator
NCT00233324	Waldemar A. Carlo, MD	Principal Investigator
NCT00233454	Jason Robert Gotlib	Principal Investigator
NCT00233987	Eileen P. Smith, MD	Study Chair
NCT00233987	Louis S. Constine, MD	Study Chair
NCT00233987	Patrick J. Stiff, MD	Study Chair
NCT00234052	Jyoti D. Patel	Study Chair
NCT00234312	Joshua Boverman, MD	Principal Investigator
NCT00235053	Eli O Meltzer, MD	Principal Investigator
NCT00237068	Benjamin D. Gold, MD.	Principal Investigator
NCT00237523	Julia Kazakhin, M.D.	Study Director
NCT00238238	John P. Leonard, MD	Study Chair
NCT00238433	Richard Maziarz, MD	Study Chair
NCT00239746	John Breitner, MD	Principal Investigator
NCT00242593	Suzanne Craft, PhD	Principal Investigator
NCT00244972	David Hong	Principal Investigator
NCT00247520	Wynne H Weston-Davies, MB FRCS	Study Director
NCT00247624	W. Vaughn McCall, MD, MS	Principal Investigator
NCT00248287	Joyce A. O'Shaughnessy, MD	Principal Investigator
NCT00248495	Grace K. Dy, MD	Principal Investigator
NCT00248521	Ian R. Judson, MA, MD, FRCP	Study Chair
NCT00249691	Bankole Johnson	Principal Investigator
NCT00254410	William G. Wierda, MD, PHD, BS	Principal Investigator
NCT00254423	Jorge Cortes, MD	Principal Investigator
NCT00254592	Rita Mehta, M.D.	Principal Investigator
NCT00255346	Hagop M Kantarjian, MD	Principal Investigator
NCT00255801	David J. Straus, MD	Principal Investigator
NCT00255801	Patricia L. Myskowski, MD	Principal Investigator
NCT00255801	Steven M. Horwitz, MD	Principal Investigator
NCT00256308	Ignatius Ou, MD	Principal Investigator
NCT00258687	F. Stephen Hodi, MD	Principal Investigator
NCT00262067	Leonardo Faoro, MD	Study Director
NCT00263341	Ruth Merkatz, Ph.D.	Study Director
NCT00265278	Reese Jones, M.D.	Principal Investigator
NCT00265759	Matthew J. Ellis, MD, PhD, FRCP	Study Chair
NCT00265798	Hedy Kindler	Principal Investigator
NCT00265850	Alan Venook, MD	Study Chair
NCT00265941	David Rosenthal, MD	Principal Investigator
NCT00265941	Phuc Felix Nguyen-Tan, MD	Study Chair
NCT00266110	Jonathan S. Serody, MD	Principal Investigator
NCT00268385	Patrick Wen	Principal Investigator
NCT00270959	Douglas F. Zatzick, MD	Principal Investigator
NCT00271505	William N. William Jr., MD	Principal Investigator
NCT00274924	Lode J. Swinnen, MD	Study Chair
NCT00274937	Carlos Rodriguez-Galindo, MD	Principal Investigator
NCT00274950	Juliet Hale, MD	Principal Investigator
NCT00275067	Jeffrey Raizer, MD	Principal Investigator
NCT00276705	Bruce Morland, MD	Study Chair
NCT00276783	Jeffrey J. Raizer, MD	Study Chair
NCT00278148	Nathan Pennell, MD	Study Chair
NCT00278343	Holger Hirte	Principal Investigator
NCT00278538	Richard Burt, MD	Principal Investigator
NCT00278629	Richard Burt, MD	Principal Investigator
NCT00282100	Alex Chang, M.D.	Principal Investigator
NCT00287287	Kenneth B Ain, M.D.	Principal Investigator
NCT00287924	Martin W. English, MD	Study Chair
NCT00288015	Mark Agulnik, MD	Principal Investigator
NCT00288080	Howard M. Sandler, MD	Principal Investigator
NCT00288080	Kenneth J. Pienta, MD, FACP	Study Chair
NCT00288080	Leonard G. Gomella, MD	Study Chair
NCT00288080	Seth Rosenthal, MD	Study Chair
NCT00288093	Tanios Bekaii-Saab	Principal Investigator
NCT00288873	Emily M Stein, M.D.	Principal Investigator
NCT00290498	Luis E. Fayad, MD	Principal Investigator
NCT00293501	Deborah L. Ornstein, MD	Study Chair
NCT00294658	Gary Cutter, PhD	Principal Investigator
NCT00294658	Gil Wolfe, MD	Principal Investigator
NCT00295373	Michael G Flynn, PhD	Study Director
NCT00295373	Robert E Hannemann, MD	Principal Investigator
NCT00295841	Bayard L. Powell, MD	Study Chair
NCT00295893	George Somlo, MD	Principal Investigator
NCT00295932	John F. Gerecitano, MD, PhD	Study Chair
NCT00298155	Peter S. Nelson, MD	Principal Investigator
NCT00298155	R. Bruce Montgomery, MD	Principal Investigator
NCT00299962	Daniel H. Sterman, M.D.	Principal Investigator
NCT00300807	John Andrews, PhD	Study Director
NCT00301067	Timothy M. Kuzel, MD	Study Chair
NCT00301093	Martha Wadleigh, MD	Principal Investigator
NCT00301756	Amit Oza	Principal Investigator
NCT00301925	David Cameron, MD	Study Chair
NCT00302003	Frank Keller, MD	Principal Investigator
NCT00304031	Mark R. Gilbert, MD	Principal Investigator
NCT00304031	Minesh P. Mehta, MD	Study Chair
NCT00304031	Roger Stupp, MD	Study Chair
NCT00304070	Carlos Rodriguez-Galindo	Principal Investigator
NCT00307151	Avy Violari, MD	Study Chair
NCT00307151	Paul Palumbo, MD	Study Chair
NCT00309907	Gregory Yanik, MD	Principal Investigator
NCT00309985	Christopher Sweeney, MBBS	Study Chair
NCT00310037	Lawrence D. Kaplan, MD	Study Chair
NCT00310180	Joseph Sparano	Principal Investigator
NCT00311805	Douglas W. Losordo, M.D.	Principal Investigator
NCT00313586	Steven Gore	Principal Investigator
NCT00314366	Emerson Perin, MD, PhD	Principal Investigator
NCT00314925	Rudin Charles, MD, PhD	Study Chair
NCT00315341	Andrew Saxon, M.D.	Principal Investigator
NCT00315341	Walter Ling, M.D.	Principal Investigator
NCT00315627	Rodolfo Alejandro, M.D.	Principal Investigator
NCT00316862	David H. Ilson, MD, PhD	Study Chair
NCT00316888	Joseph A. Sparano, MD	Study Chair
NCT00316888	Madhur K. Garg, MD	Study Chair
NCT00317603	Beth Overmoyer, MD	Principal Investigator
NCT00318383	Matt Hohenboken, MD, PhD	Study Director
NCT00319839	S.-H. Ignatius Ou, MD, PhD	Principal Investigator
NCT00321685	Jerome Landry	Principal Investigator
NCT00321698	Mark Garzotto, MD	Principal Investigator
NCT00322023	Daniel C. Javitt, MD, PhD	Principal Investigator
NCT00322309	Maryam Afshar, MD	Principal Investigator
NCT00323063	Deborah R. Toppmeyer, MD	Principal Investigator
NCT00324805	Heather Wakelee	Principal Investigator
NCT00325182	Ofra Sarid-Segal, MD	Principal Investigator
NCT00325286	Sriram Ramaswamy, M.D.	Principal Investigator
NCT00326872	Dusica Babovic-Vuksanovic	Principal Investigator
NCT00329043	Amado Zurita, MD	Principal Investigator
NCT00329719	Kurt Jaeckle	Principal Investigator
NCT00331162	Alan C Farney, MD, Ph.D.	Principal Investigator
NCT00331630	Virginia G. Kaklamani, MD	Principal Investigator
NCT00331760	Anuja Jhingran, MD	Study Chair
NCT00334672	Vasanta Nanduri, MD	Study Chair
NCT00334737	Adam Rosenberg, MD	Principal Investigator
NCT00334737	Robert D Christensen, MD	Principal Investigator
NCT00334737	Robin K Ohls, MD	Principal Investigator
NCT00334737	Susan Wiedmeier, MD	Principal Investigator
NCT00334789	Thehang Luu	Principal Investigator
NCT00335816	Julio Garcia-Aguilar, MD, PhD	Study Chair
NCT00335868	Ronald Paquette, MD	Study Chair
NCT00336024	Claire Mazewski, MD	Principal Investigator
NCT00336063	Wen-Son Hsieh	Principal Investigator
NCT00336947	Mamoru Tsukuda, MD	Study Chair
NCT00337207	Jeffrey J. Raizer, MD	Principal Investigator
NCT00346164	Sheri Spunt, MD	Principal Investigator
NCT00347828	Michael B Raizman, B.A./M.D.	Principal Investigator
NCT00347828	Rahul Mandiga, B.S.	Study Director
NCT00347828	Sandra Y Cho, B.A./M.D.	Study Director
NCT00348816	Gregory P. Swanson, MD	Study Chair
NCT00348946	Judith L. Ross, M.D.	Principal Investigator
NCT00350701	Paresh Dandona, MD	Principal Investigator
NCT00351299	Gerald L Weinhouse, MD	Principal Investigator
NCT00352027	Monika Metzger, M.D.	Principal Investigator
NCT00352794	Srdan Verstovsek, MD	Principal Investigator
NCT00354744	Brenda Weigel, MD	Study Chair
NCT00354744	Carola A Arndt, MD	Study Chair
NCT00354835	Douglas Hawkins, MD	Principal Investigator
NCT00357448	Lupe Salazar	Principal Investigator
NCT00357877	Athena Papas, PhD DMD	Principal Investigator
NCT00358163	Pankaj Bhargava, MD	Principal Investigator
NCT00361244	Andrew X. Zhu, MD	Principal Investigator
NCT00361296	B. Douglas Smith, MD	Principal Investigator
NCT00364390	Bartley P Griffith, MD	Principal Investigator
NCT00364390	George Tellides, M.D., Ph.D.	Principal Investigator
NCT00364598	Kenneth B Margulies, M.D.	Principal Investigator
NCT00364598	Y. Joseph Woo, M.D.	Principal Investigator
NCT00365105	Michael J. Seider, MD, PhD, FACR	Study Chair
NCT00365157	David Quinn	Principal Investigator
NCT00369317	Jeffrey Taub, MD	Principal Investigator
NCT00369707	Andrew M. Evens, DO, MS	Principal Investigator
NCT00371033	John Kusek, PhD	Study Director
NCT00371033	Lee Nyberg, PhD, MD	Study Director
NCT00372515	Bruce Johnson, MD	Principal Investigator
NCT00372593	Alan S. Gamis, MD, MPH	Study Chair
NCT00372593	Richard Aplenc, MD, MSCE	Study Chair
NCT00372619	Bassem I. Razzouk, MD	Study Chair
NCT00372619	Todd Cooper, DO	Study Chair
NCT00372905	Jane Winter, MD	Principal Investigator
NCT00376688	Gini Fleming	Principal Investigator
NCT00376961	Richard I. Fisher, MD	Study Chair
NCT00376961	Steven H. Bernstein, MD	Study Chair
NCT00378105	Paul Richardson, MD	Principal Investigator
NCT00378209	Paul Richardson, MD	Principal Investigator
NCT00378703	Keith Flaherty	Principal Investigator
NCT00379340	David Dix, MD	Principal Investigator
NCT00380029	Raj S. Pruthi, MD	Principal Investigator
NCT00380679	Daniel Fishbein, MD	Principal Investigator
NCT00380679	William M Cassidy, MD	Principal Investigator
NCT00381108	Leland Ronningen, MD	Principal Investigator
NCT00381641	Jonas De Souza	Principal Investigator
NCT00381680	Glen Lew, MD	Principal Investigator
NCT00381797	Sridharan Gururangan	Principal Investigator
NCT00382018	Daniel F. Hayes, MD	Study Chair
NCT00382018	Eric P. Winer, MD	Study Chair
NCT00382018	Jeffrey B. Smerage, MD, PhD	Study Chair
NCT00382070	Norman Wolmark, MD	Principal Investigator
NCT00382109	Michael Pulsipher, MD	Principal Investigator
NCT00382200	Virginia Klimek, MD	Study Chair
NCT00383851	Gilad Gordon, MD	Study Director
NCT00383994	Issa F. Khouri, MD	Principal Investigator
NCT00384176	Jane Robertson	Study Director
NCT00385502	Michael H. Silverman, MD	Study Director
NCT00387075	Danna Jennings, MD	Principal Investigator
NCT00387530	William L. Read, MD	Study Chair
NCT00389038	Scott W. Powers, PhD, ABPP, FAHS	Principal Investigator
NCT00389610	Daniel A. Laheru, MD	Principal Investigator
NCT00390000	Julian Molina	Principal Investigator
NCT00390325	Manisha Shah	Principal Investigator
NCT00390455	Harold Burstein	Principal Investigator
NCT00390767	Sam L Teichman, MD	Study Director
NCT00390793	Farhad Ravandi-Kashani, MD	Principal Investigator
NCT00392015	Cindy Tamminga, MD, MPH	Principal Investigator
NCT00392054	Carlos A Morillo, MD	Principal Investigator
NCT00392054	Natale Andrea, MD	Principal Investigator
NCT00392340	Guy Makin, MD, PhD	Study Chair
NCT00392353	Lewis Silverman	Principal Investigator
NCT00392951	David T. Teachey, MD	Principal Investigator
NCT00392990	Leo Gordon, MD	Principal Investigator
NCT00393783	Teresa Gilewski, MD	Principal Investigator
NCT00394433	Peter Enzinger, MD	Principal Investigator
NCT00395538	Rachel I Gafni, M.D.	Principal Investigator
NCT00396019	Jean Tersak, M.D.	Principal Investigator
NCT00397579	Arthur E. Frankel, MD	Principal Investigator
NCT00397917	Jeffrey Murray, MD	Principal Investigator
NCT00398450	Gregory A. Daniels, MD, PhD	Principal Investigator
NCT00400374	Dong Shin, MD	Principal Investigator
NCT00400816	David M. Peereboom, MD	Study Chair
NCT00400946	Lewis B. Silverman, MD	Principal Investigator
NCT00401817	John P Leonard, MD	Principal Investigator
NCT00402779	Vassiliki Papadimitrakopoulou, M.D.	Principal Investigator
NCT00404417	Kevin R Cannard, MD	Principal Investigator
NCT00405327	James D Geiger, M.D.	Principal Investigator
NCT00405574	Gilad Gordon, MD	Study Director
NCT00405587	Henry Hsu, MD	Study Director
NCT00406809	Mack Mabry, MD	Study Director
NCT00407381	Diana Do, MD	Principal Investigator
NCT00407550	Julian Molina, MD, PhD	Principal Investigator
NCT00408005	Stuart Winter	Principal Investigator
NCT00408408	Norman Wolmark, MD	Principal Investigator
NCT00408499	David R. Gandara, MD	Study Chair
NCT00409383	Anna C Pavlick, MD	Principal Investigator
NCT00410462	Hans Gelderblom, MD, PhD	Study Chair
NCT00410553	Rakesh Goel	Principal Investigator
NCT00410605	Natalie Callander	Principal Investigator
NCT00410813	Anne F. Schott, MD	Study Chair
NCT00410813	Catherine Van Poznak, MD	Study Chair
NCT00410956	William R. Jarnagin, MD	Principal Investigator
NCT00411086	Nathan Fowler, MD	Principal Investigator
NCT00411632	William N. William Jr., MD	Principal Investigator
NCT00411723	Christopher Bever, Jr., M.D., M.B.A.	Principal Investigator
NCT00411723	David Mattson, M.D., Ph.D.	Principal Investigator
NCT00411723	Jana Preiningerova, M.D.	Principal Investigator
NCT00411723	Sharon Lynch, M.D.	Principal Investigator
NCT00411723	Theodore R Brown, M.D.	Principal Investigator
NCT00411723	Vijayshree Yadav, M.D.	Principal Investigator
NCT00414076	Robert Coleman, MD	Principal Investigator
NCT00414648	Bruce Trapnell, MD	Principal Investigator
NCT00414648	Frank McCormack, MD	Principal Investigator
NCT00416351	Steven M. Horwitz, MD	Principal Investigator
NCT00416455	Mostafa Atri	Principal Investigator
NCT00416598	William Blum	Principal Investigator
NCT00417560	Carolyn Bridges, MD	Principal Investigator
NCT00417794	Laura J McGuinn, PhD	Principal Investigator
NCT00418496	J. Paul Monk, M.D.	Principal Investigator
NCT00419562	Jay Skyler, M.D.	Study Chair
NCT00419562	Jeff Krischer, Ph.D.	Principal Investigator
NCT00422591	Farhad Ravandi-Kashani, MD	Principal Investigator
NCT00422799	Irene Ghobrial, MD	Principal Investigator
NCT00423293	Lisa A. Kachnic, MD	Study Chair
NCT00423397	William L. Read, MD	Study Chair
NCT00423514	Farid Boulad, MD	Principal Investigator
NCT00423735	Andrew Lassman	Principal Investigator
NCT00423917	Winston Tan, MD, FACP	Study Chair
NCT00424164	Pierre Fumoleau, MD, PhD	Study Chair
NCT00424242	Jeffrey J. Raizer, MD	Principal Investigator
NCT00424515	F. Stephen Hodi, MD	Principal Investigator
NCT00425477	B. Douglas Smith, MD	Study Chair
NCT00425607	Mark W Kieran, MD, PhD	Study Chair
NCT00425672	Lupe Salazar	Principal Investigator
NCT00425802	Craig Moskowitz, MD	Principal Investigator
NCT00425802	Hugo R. Castro-Malaspina, MD	Principal Investigator
NCT00425802	Juliet Barker, MBBS	Principal Investigator
NCT00426764	Kenichi Takeshita, MD	Study Director
NCT00428298	Jennifer L Payne, MD	Principal Investigator
NCT00428922	Bhuvaneswari Ramaswamy, MD	Principal Investigator
NCT00430040	Paresh Dandona, MD, PhD	Principal Investigator
NCT00430183	James Eastham, MD	Study Chair
NCT00433511	Kathy Miller	Principal Investigator
NCT00433550	Robert McWilliams, MD	Study Chair
NCT00436267	Kenneth L. Pennington, MD	Study Chair
NCT00436332	Howard L. West, MD	Study Chair
NCT00436852	Elizabeth Fox, MD	Principal Investigator
NCT00438256	Theodore Hong, MD	Principal Investigator
NCT00438802	Thomas E. Witzig, MD	Study Chair
NCT00438841	William I. Bensinger, MD	Principal Investigator
NCT00439465	Kenneth Meehan, MD	Principal Investigator
NCT00439556	Issa F. Khouri, MD	Principal Investigator
NCT00439972	Robert H Knopp, MD	Principal Investigator
NCT00441142	Patrick Y Wen, MD	Principal Investigator
NCT00442130	Catherine J. Wu, MD	Principal Investigator
NCT00442533	Ebrahim Delpassand, M.D.	Principal Investigator
NCT00445692	Leona Holmberg	Principal Investigator
NCT00445887	Gus Rodriguez, MD	Study Chair
NCT00448357	Thomas C. Shea, MD	Principal Investigator
NCT00448734	Robert Earhart, MD	Study Director
NCT00449007	Maria A. Oquendo, MD	Principal Investigator
NCT00449657	Paul Walker, MD	Principal Investigator
NCT00450398	Stefan Hemmerich, PhD	Study Director
NCT00450450	Stephan A. Grupp, MD PhD	Principal Investigator
NCT00450463	Ravi A Madan, M.D.	Principal Investigator
NCT00452023	Srdan Verstovsek, MD	Principal Investigator
NCT00453154	Neal Ready	Principal Investigator
NCT00453388	Hans-Peter Kiem	Principal Investigator
NCT00454168	Craig S. Rosenfeld, MD	Study Chair
NCT00454389	Jeffrey A Nau, MMS	Study Director
NCT00454389	Pravin Dugel, MD	Principal Investigator
NCT00455312	Jakub Tolar, M.D., Ph.D.	Principal Investigator
NCT00455325	Clay F. Semenkovich, MD	Principal Investigator
NCT00455689	Hadine Joffe, M.D., M.Sc.	Principal Investigator
NCT00457639	Abhimanyu Garg, M.D.	Principal Investigator
NCT00457769	Anna M Barrett, MD	Principal Investigator
NCT00458653	David Avigan, MD	Principal Investigator
NCT00460031	Jorge Garcia, MD	Principal Investigator
NCT00460031	Matthew M. Cooney, MD	Principal Investigator
NCT00460174	William Small, MD	Study Chair
NCT00460239	Eric C Strain, M.D.	Principal Investigator
NCT00461045	Steven D Reich, MD	Study Director
NCT00464620	Scott Schuetze, MD, PhD	Principal Investigator
NCT00464711	Dan Iosifescu, MD	Principal Investigator
NCT00465491	Dr. Hazel Breitz, M.D.	Study Director
NCT00466661	Bryan K Tolliver, M.D., Ph.D.	Principal Investigator
NCT00466661	Kathleen T Brady, M.D., Ph.D.	Study Director
NCT00466895	Leslie Andritsos, MD	Principal Investigator
NCT00466921	Timothy M. Kuzel, MD	Study Chair
NCT00467051	Carlos Rodriguez-Galindo, MD	Principal Investigator
NCT00468117	James F. Markmann, MD, PhD	Principal Investigator
NCT00468169	Everett E Vokes, MD	Principal Investigator
NCT00468715	Tiffany A. Traina, MD	Principal Investigator
NCT00468910	Hemant Roy	Principal Investigator
NCT00469859	Donald Small, MD, PhD	Study Chair
NCT00469859	Patrick A. Brown, MD	Study Chair
NCT00470015	Svetomir Markovic, MD, PhD	Study Chair
NCT00470496	Hassan Arshad	Principal Investigator
NCT00470704	Nancy Lin, MD	Principal Investigator
NCT00474747	Paolo Anderlini, MD	Principal Investigator
NCT00474929	Shaji K. Kumar, MD	Principal Investigator
NCT00474929	Thomas E. Witzig, MD	Principal Investigator
NCT00475020	Uday Popat, MD	Principal Investigator
NCT00476190	Daniel DeAngelo, MD	Principal Investigator
NCT00477412	Michael Wang, MD, MS	Principal Investigator
NCT00477750	Craig B. Reeder, MD	Principal Investigator
NCT00477750	Philip R. Greipp, MD	Principal Investigator
NCT00477750	Vivek Roy, MD, FACP	Study Chair
NCT00477815	Angela Dispenzieri, MD	Study Chair
NCT00478426	Amit Oza	Principal Investigator
NCT00478465	Jose G Montoya, MD	Principal Investigator
NCT00478946	Robert Earhart, MD, PhD	Study Director
NCT00479128	Arlene Siefker-Radtke, MD	Principal Investigator
NCT00481091	Mack Mabry, MD	Study Director
NCT00481832	Wen-Kai Weng	Principal Investigator
NCT00482092	Priya Raina	Study Director
NCT00482378	Angela Dispenzieri, M.D.	Study Chair
NCT00482950	Hans-Peter Guler, MD	Study Director
NCT00483223	Steven Isakoff, MD, PhD	Principal Investigator
NCT00483366	Elizabeth C. Reed, MD	Study Chair
NCT00483366	Ralph Hauke, MD	Principal Investigator
NCT00485264	Andrew Wiznia, MD	Study Chair
NCT00485264	Sharon A. Nachman, MD	Study Chair
NCT00486603	Myrna Rosenfeld, MD, PhD	Study Chair
NCT00486642	Kim Chi	Principal Investigator
NCT00486668	Norman Wolmark, MD	Principal Investigator
NCT00487305	Eric Jacobsen, MD	Principal Investigator
NCT00489307	Sriram Yennurajalingam, MD	Principal Investigator
NCT00490061	Quynh-Thu Le	Principal Investigator
NCT00490529	Ronald Levy	Principal Investigator
NCT00491816	Priyanka Sharma, M.D.	Principal Investigator
NCT00492050	Sheeba Thomas, MD	Principal Investigator
NCT00492167	Brian H. Kushner, MD	Principal Investigator
NCT00492167	Shakeel Modak, MD	Study Chair
NCT00492349	L. Elliot Hong, M.D.	Principal Investigator
NCT00492999	Michael D'Angelica, MD	Principal Investigator
NCT00492999	Nancy E. Kemeny, MD	Principal Investigator
NCT00493064	Michael Gaynon, MD	Principal Investigator
NCT00493870	Joanne L Blum, MD	Principal Investigator
NCT00494182	George Blumenschein, MD	Principal Investigator
NCT00494234	Andrew Tutt, PhD MRCP FRCR	Principal Investigator
NCT00494234	James Carmichael, BSc, MBChB, MD, FRCP	Study Director
NCT00494442	Andrew Tutt, PhD MRCP FRCR	Principal Investigator
NCT00494442	James Carmichael, BSc MBChB MD FRCP	Study Director
NCT00495170	Joe Y. Chang, MD, PhD	Principal Investigator
NCT00495716	Anna Wald, MD, MPH	Principal Investigator
NCT00496366	Deborah Toppmeyer, MD	Principal Investigator
NCT00497952	Joanne Kurtzberg, MD	Principal Investigator
NCT00497952	Suzanne T. Ildstad, M.D.	Study Director
NCT00498316	Elizabeth Shpall, MD	Principal Investigator
NCT00499083	Elizabeth C. Reed, MD	Principal Investigator
NCT00499083	Kenneth H. Cowan, MD, PhD	Principal Investigator
NCT00499135	Glenn Liu	Principal Investigator
NCT00499525	William J. Gradishar, MD	Study Chair
NCT00499603	Ana Gonzalez-Angulo, M.D.	Principal Investigator
NCT00499616	Clare Twist, MD	Study Chair
NCT00499616	Mary Lou Schmidt, MD	Study Chair
NCT00499655	Karen Reckamp	Principal Investigator
NCT00500045	Michael Gaynon, MD	Principal Investigator
NCT00500344	Rajendra S. Apte, MD, PhD	Principal Investigator
NCT00500890	Michael E. Rytting, MD	Principal Investigator
NCT00501410	Scott Kopetz, MD	Principal Investigator
NCT00504751	Richard Furman, MD	Principal Investigator
NCT00504894	Kane Pryor, M.D.	Principal Investigator
NCT00505063	Rachel Kobos, MD	Principal Investigator
NCT00507728	Paul Cinciripini, PhD	Principal Investigator
NCT00509093	Anjali Advani, MD	Principal Investigator
NCT00509093	Brenda Cooper, MD	Principal Investigator
NCT00509899	Ayalew Tefferi, MD	Principal Investigator
NCT00509899	Srdan Verstovsek, MD, PhD	Principal Investigator
NCT00511992	D. Scott McMeekin, MD	Principal Investigator
NCT00513240	Dean B. Andropoulos, M.D.	Principal Investigator
NCT00513292	Aman Buzdar	Principal Investigator
NCT00513383	Lori J. Wirth, MD	Principal Investigator
NCT00513461	John Hoefs	Principal Investigator
NCT00513578	Craig S. Rosenfeld, MD	Study Chair
NCT00513695	Jennifer Specht	Principal Investigator
NCT00513747	John C. Byrd, MD	Study Chair
NCT00513786	David O'Malley, MD	Principal Investigator
NCT00514046	Brigitte C Widemann, M.D.	Principal Investigator
NCT00514072	James L. Gulley, MD, PhD, FACP	Principal Investigator
NCT00514449	Konasale Prasad, MD	Principal Investigator
NCT00514774	Penelope Hogarth, M.D.	Principal Investigator
NCT00515021	James A Muldowney, III, MD	Principal Investigator
NCT00515281	Michael D. Schreiber, M.D.	Principal Investigator
NCT00515528	Thomas Gajeweski, MD, PhD	Principal Investigator
NCT00516100	Ronald B. Natale, MD	Principal Investigator
NCT00516373	Dr. Johann De Bono, PhD MRCP FRCR	Principal Investigator
NCT00516373	Jane Robertson, BSc, MBCHB, MD	Study Director
NCT00516477	Albert M Maguire, MD	Principal Investigator
NCT00516607	Roy Rampling, MD, PhD	Study Chair
NCT00518583	John Macdonald, MD	Study Director
NCT00520130	Lauren M Curtis, M.D.	Principal Investigator
NCT00520767	Jeffrey A. Zonder, MD	Principal Investigator
NCT00520910	Brian Berman, M.D., Ph.D.	Principal Investigator
NCT00520975	Ingrid Mayer	Principal Investigator
NCT00524277	Elizabeth A Mittendorf, MD, FACS	Principal Investigator
NCT00524277	George E Peoples, MD, FACS	Study Director
NCT00525577	Walker Long, MD	Study Chair
NCT00526591	Jorge A. Garcia, MD	Principal Investigator
NCT00527566	Michael Wechsler, MD	Principal Investigator
NCT00528580	Jerry Krishnan, MD	Principal Investigator
NCT00528866	Mark Hurwitz, MD	Principal Investigator
NCT00528866	Oliver Sartor, MD	Study Chair
NCT00528866	Ying Xiao, PhD	Study Chair
NCT00528957	Erin Quirk, MD	Study Director
NCT00528983	Barry Skikne, M.D., FACP; FCP (SA)	Study Director
NCT00529035	John Koreth, MBBS, D.Phil	Principal Investigator
NCT00530868	Andres Forero, M.D.	Principal Investigator
NCT00531284	Naseem Zojwalla	Study Director
NCT00533949	Alex A. Adjei, MD, PhD	Study Chair
NCT00533949	Arthur William Blackstock, MD	Study Chair
NCT00533949	Gregory A. Masters, MD	Study Chair
NCT00533949	Hak Choy, MD	Study Chair
NCT00533949	Jeffrey A. Bogart, MD	Study Chair
NCT00533949	Jeffrey Bradley, MD	Principal Investigator
NCT00533949	Mark A. Socinski, MD	Study Chair
NCT00533949	Steven E. Schild, MD	Study Chair
NCT00536341	Ian W. Flinn, M.D.	Study Chair
NCT00536874	Eileen O'Reilly, MD	Principal Investigator
NCT00536874	Peter J. Allen, MD	Principal Investigator
NCT00536952	Bharat B. Mittal, MD	Study Chair
NCT00536991	Saby George	Principal Investigator
NCT00538720	Nancy D. Perrier, MD	Principal Investigator
NCT00538824	Ruben Niesvizky, MD	Principal Investigator
NCT00539591	Alberto Pappo, MD	Principal Investigator
NCT00540007	Todd Fehniger, M.D., Ph.D.	Principal Investigator
NCT00540930	Carol L Shields, MD	Principal Investigator
NCT00540995	Anthony Stein	Principal Investigator
NCT00542451	Eric Winer, MD	Principal Investigator
NCT00543504	Funda Meric-Bernstam, MD	Principal Investigator
NCT00544830	Przemyslaw W. Twardowski, MD	Principal Investigator
NCT00547066	William Wegener, MD, PHD	Study Chair
NCT00547378	Steven Siegel, MD	Study Chair
NCT00550537	David Carbone, M.D., Ph.D.	Study Chair
NCT00550615	Julie Vose, M.D.	Principal Investigator
NCT00551070	John Farley	Principal Investigator
NCT00551460	Cheryl L. Willman, MD	Study Chair
NCT00551460	Jeffrey E. Lancet, MD	Study Chair
NCT00551460	Marilyn L. Slovak, PhD	Study Chair
NCT00551460	Rami Komrokji, MD	Study Chair
NCT00553098	Lauri Burroughs	Principal Investigator
NCT00553150	Jann N. Sarkaria, MD	Study Chair
NCT00553202	Stella M. Davies, MBBS, PhD	Study Chair
NCT00553410	Marco Colleoni, MD	Study Chair
NCT00553462	Rogerio Lilenbaum, MD	Study Chair
NCT00553644	Vicki Morrison	Principal Investigator
NCT00553683	Andrew N. de la Torre, MD	Study Chair
NCT00553800	Hossein Borghaei, DO	Principal Investigator
NCT00554515	Allen Pantuck, MD	Principal Investigator
NCT00554515	David F McDermott, MD	Study Chair
NCT00554515	Geoffrey Weiss, MD	Principal Investigator
NCT00554515	Janice Dutcher, MD	Principal Investigator
NCT00554515	Jeffrey Sosman, MD	Principal Investigator
NCT00554515	Joseph Clark, MD	Principal Investigator
NCT00554515	Kim Margolin, MD	Principal Investigator
NCT00554515	Leonard Appleman, MD	Principal Investigator
NCT00554515	Leslie Oleksowicz, MD	Principal Investigator
NCT00554515	Marc Ernstoff, MD	Principal Investigator
NCT00554515	Michael Wong, MD	Principal Investigator
NCT00554515	Theodore Logan, MD	Principal Investigator
NCT00554515	Ulka Vaishampayan, MD	Principal Investigator
NCT00554515	Walter Urba, MD	Principal Investigator
NCT00554788	Ira Dunkel, MD	Principal Investigator
NCT00555399	Marta Penas-Prado, MD	Principal Investigator
NCT00555399	Vinay Puduvalli, MD	Study Chair
NCT00555581	Robert Spiera, MD	Principal Investigator
NCT00557193	Joanne Hilden, MD	Principal Investigator
NCT00557349	Roger de la Torre, MD	Principal Investigator
NCT00557492	Herbert J. Zeh, MD	Principal Investigator
NCT00558519	Wendy Stock, M.D.	Study Chair
NCT00558896	Martha Q. Lacy, MD	Study Chair
NCT00559117	Andrew Brenner, MD	Principal Investigator
NCT00559117	Pierre Triozzi, Dr.	Principal Investigator
NCT00559819	Asokumar Buvanendran, MD	Study Director
NCT00560586	Leila Kheirandish, MD	Principal Investigator
NCT00562328	Clive S. Zent, MD	Study Chair
NCT00562640	Richard J. O'Reilly, MD	Principal Investigator
NCT00562640	Roisin O'Cearbhaill, MB, BCh	Principal Investigator
NCT00563212	Rany Condos, MD	Principal Investigator
NCT00563784	Ritsuko R. Komaki, MD	Principal Investigator
NCT00565487	Yixing Jiang, M.D.	Principal Investigator
NCT00565773	Antonio Guasch, MD	Principal Investigator
NCT00566488	M. Louise Markert, MD, PhD	Principal Investigator
NCT00566540	Enver Ozer, MD	Principal Investigator
NCT00566618	Stacy Moulder, MD	Principal Investigator
NCT00566696	Brandon Triplett, MD	Principal Investigator
NCT00566852	Christina A. Meyers, PhD	Study Chair
NCT00566852	Deepak Khuntia, MD	Study Chair
NCT00566852	Paul D. Brown, MD	Principal Investigator
NCT00566852	Sherry Fox, RN, PhD	Study Chair
NCT00567190	Ru Walker, M.D.	Study Director
NCT00567359	Lecia V. Sequist, MD, MPH	Principal Investigator
NCT00567567	Julie Park, MD	Principal Investigator
NCT00567580	Alan Pollack, MD, PhD	Principal Investigator
NCT00567580	Joycelyn L. Speight, MD, PhD	Study Chair
NCT00567580	Leonard G. Gomella, MD	Study Chair
NCT00569127	James Yao	Principal Investigator
NCT00570258	Issam Makhoul, MD	Principal Investigator
NCT00570674	Roy B. Tishler, MD	Principal Investigator
NCT00571298	David J Sugarbaker, MD	Principal Investigator
NCT00572065	Gail Roboz, MD	Principal Investigator
NCT00572078	Daniela E Matei, MD	Principal Investigator
NCT00572078	Elena G Chiorean, MD	Principal Investigator
NCT00572169	Gareth Morgan, MD, PhD	Principal Investigator
NCT00572897	Damiano Rondelli, MD	Study Chair
NCT00572897	Giovanni Barosi, MD	Study Chair
NCT00572897	John Mascarenhas, MD	Principal Investigator
NCT00573794	Andreas Lazar, MD	Study Director
NCT00574119	Marvin W Kronenberg, MD	Principal Investigator
NCT00574496	Craig Moskowitz, MD	Principal Investigator
NCT00574496	Farid Boulad, MD	Principal Investigator
NCT00574496	Juliet Barker, MBBS	Principal Investigator
NCT00574496	Miguel-Angel Perales, MD	Principal Investigator
NCT00574496	Tanya Trippett, MD	Principal Investigator
NCT00574587	Joseph Sparano, MD	Principal Investigator
NCT00574769	Mitchell E Gross, MD, Ph.D	Principal Investigator
NCT00575393	Julian Molina, MD, PhD	Principal Investigator
NCT00575952	D. McMeekin	Principal Investigator
NCT00576225	Jack W. Singer, M.D.	Study Director
NCT00576680	Jennifer Chan, MD, PhD	Principal Investigator
NCT00576836	M. Louise Markert, MD, PhD	Principal Investigator
NCT00576979	Anthony S. Stein, MD	Study Chair
NCT00577005	Gerardo Gonzalez, MD	Principal Investigator
NCT00577200	Asokumar Buvanendran, M.D.	Principal Investigator
NCT00577278	Auayporn P. Nademanee, MD	Study Chair
NCT00577304	Jan Ohrstrom, PhD	Study Director
NCT00577382	F. Stephen Hodi, MD	Principal Investigator
NCT00577577	Richard Moxley, M.D.	Study Chair
NCT00577629	David Rizzieri, MD	Principal Investigator
NCT00579280	David Sheehan, MD	Principal Investigator
NCT00579527	M. Louise Markert, MD, PhD	Principal Investigator
NCT00580333	Paula D. Ryan, MD	Principal Investigator
NCT00580645	Sherry A McKee, PhD	Principal Investigator
NCT00580853	Sherry A McKee, PhD	Principal Investigator
NCT00580931	Steven S Schreiber, MD	Principal Investigator
NCT00583024	David M Lubaroff, PhD	Principal Investigator
NCT00583453	Douglas VanDaele, MD	Principal Investigator
NCT00583752	David M Lubaroff, PhD	Principal Investigator
NCT00586391	Carlos Ramos, MD	Principal Investigator
NCT00588770	Athanassios (Ethan) Argiris	Principal Investigator
NCT00588991	Keith Pratz	Principal Investigator
NCT00589056	Amit Maity	Principal Investigator
NCT00589121	Burton L. Eisenberg, MD	Study Chair
NCT00589121	David G. Kirsch, MD, PhD	Study Chair
NCT00589121	Dian Wang, MD, PhD	Principal Investigator
NCT00589121	John M. Kane, MD	Study Chair
NCT00589121	Scott Okuno, MD	Study Chair
NCT00589186	Toh Han Chong, MD, MBBS, MRCP	Study Chair
NCT00589875	E. Antonio Chiocca, MD, PhD	Principal Investigator
NCT00590824	Mark R Albertini, MD	Study Chair
NCT00590824	Paul M Sondel, MD, PhD	Principal Investigator
NCT00590954	Thomas Kaley, MD	Principal Investigator
NCT00591058	Burt Nabors, MD	Principal Investigator
NCT00591058	Gerry Linette, MD	Principal Investigator
NCT00591058	Glenn Lesser, MD	Principal Investigator
NCT00591058	Jeremy Rudnick, MD	Principal Investigator
NCT00591058	Maceij Mrugala, MD	Principal Investigator
NCT00591058	Sean Grimm, MD	Principal Investigator
NCT00591058	Steven Rosenfeld, MD, PhD	Principal Investigator
NCT00591292	Jonathan Lewis, MD	Study Director
NCT00591383	Jonathan Lewis, MD	Study Director
NCT00591422	Jonathan Lewis, MD, PhD	Study Director
NCT00591630	Issa F. Khouri, MD	Principal Investigator
NCT00592150	Robert M Carey, MD	Principal Investigator
NCT00592501	Annie W Chan, MD	Principal Investigator
NCT00593242	Charles M Cotten, MD MHS	Principal Investigator
NCT00593450	Daniel F Martin, MD	Study Chair
NCT00593450	Glenn Jaffe,, MD	Study Director
NCT00593450	Juan E Grunwald, MD	Principal Investigator
NCT00593450	Maureen G Maguire, PhD	Study Director
NCT00593450	Stuart L Fine, MD	Study Chair
NCT00593554	Sherif Farag, MD/PhD	Principal Investigator
NCT00595088	Donald Lamm, MD	Principal Investigator
NCT00596011	Nagi Kumar, PhD	Principal Investigator
NCT00596531	William H Martin, Ph.D.	Principal Investigator
NCT00596531	Yongbing Shi, M.D., Ph.D.	Principal Investigator
NCT00596622	Amit Anand, MD	Principal Investigator
NCT00599170	Anil Tulpule, MD	Principal Investigator
NCT00600496	Jeffrey Infante, MD	Principal Investigator
NCT00600496	Kevin Kim, MD	Principal Investigator
NCT00600496	Patricia LoRusso, DO	Principal Investigator
NCT00600496	Roger Cohen, MD	Principal Investigator
NCT00601094	Jay M. Lee, MD	Study Chair
NCT00601705	David J. Adelstein, MD	Principal Investigator
NCT00601900	Maura Dickler	Principal Investigator
NCT00601913	J. D. Browne, MD	Principal Investigator
NCT00601913	Mercedes Porosnicu, MD	Principal Investigator
NCT00602186	SAKINEH hajebrahimi, MD	Study Director
NCT00602459	John Byrd	Principal Investigator
NCT00602641	Alexander Stewart	Principal Investigator
NCT00602693	Claudio G. Brunstein, MD, PhD	Principal Investigator
NCT00602693	Margaret L. MacMillan, MD	Principal Investigator
NCT00602836	Han Win Tun, MD	Principal Investigator
NCT00602836	Jose F. Leis, MD, PhD	Principal Investigator
NCT00602836	Tait D. Shanafelt, MD	Study Chair
NCT00604591	Edward Huey, MD	Principal Investigator
NCT00605696	Michelle Ng Gong, MD, MS	Principal Investigator
NCT00608075	Caleb M Adler, MD	Principal Investigator
NCT00608205	David J. Adelstein, MD	Principal Investigator
NCT00608205	Panayiotis Savvides, MD	Principal Investigator
NCT00609336	Andrew Coveler	Principal Investigator
NCT00609791	Arti Hurria, MD	Principal Investigator
NCT00610493	Sarina Piha-Paul, MD	Principal Investigator
NCT00611208	Arthur E Frankel, MD	Principal Investigator
NCT00611208	Cesar Rodriguez, MD	Principal Investigator
NCT00611208	Madeleine Duvic, MD	Principal Investigator
NCT00611572	Handan Gunduz-Bruce, M.D.	Principal Investigator
NCT00612274	Stuart Seropian, M.D.	Principal Investigator
NCT00613080	Adam C. Berger, MD	Study Chair
NCT00613080	Johanna Bendell, MD	Study Chair
NCT00613080	Michael C. Garofalo, MD	Principal Investigator
NCT00614809	Wu yilong, MD	Principal Investigator
NCT00614822	Michael Guarino, MD	Principal Investigator
NCT00615784	Donald E. Tsai, MD, PhD	Principal Investigator
NCT00617409	Scott Antonia, M.D.	Principal Investigator
NCT00617942	William Sikov, MD	Principal Investigator
NCT00617981	Riccardo Lencioni, M.D.	Study Director
NCT00617981	Ronnie T Poon, M.D.	Study Director
NCT00618605	Dan Barouch, MD, PhD	Study Chair
NCT00618605	Lindsey Baden, MD	Study Chair
NCT00618605	Raphael Dolin, MD	Study Chair
NCT00620633	Susan Prockop, MD	Principal Investigator
NCT00621309	David L Eaton, PhD	Principal Investigator
NCT00621686	Evanthia Galanis, MD	Study Chair
NCT00622466	Barbara B. Haley, MD	Principal Investigator
NCT00622726	Helen A. Mintz-Hittner, M.D.	Principal Investigator
NCT00624013	Mayer Davidson, M.D.	Study Director
NCT00624715	Deepak D'Souza, M.D.	Principal Investigator
NCT00624923	Allison B. Goldfine, MD	Principal Investigator
NCT00624923	Ernest Schaefer, MD	Principal Investigator
NCT00624923	Francine Welty, MD	Study Director
NCT00624923	Melvin Clouse, MD	Principal Investigator
NCT00624923	Steven E. Shoelson, MD, PhD	Principal Investigator
NCT00625820	Rajiv Saran, MD	Principal Investigator
NCT00625846	Keith Bible	Principal Investigator
NCT00626483	Gordana Vlahovic, MD	Principal Investigator
NCT00626990	Anna Nowak, MD	Study Chair
NCT00626990	Michael A. Vogelbaum, MD, PhD	Study Chair
NCT00626990	S. Erridge	Study Chair
NCT00626990	Warren P. Mason, MD	Study Chair
NCT00626990	Wolfgang Wick	Study Chair
NCT00628251	Jane Robertson, BSc, MBCHB, MD	Study Director
NCT00628251	Stan Kaye, BSc, MB, FRCP, FRCR, SMedSCi	Principal Investigator
NCT00628498	Paul Richardson, M.D.	Principal Investigator
NCT00628498	William Tappe, M.D.	Study Chair
NCT00628914	Ian A Cook, MD	Principal Investigator
NCT00629343	Robert N Taub, MD	Principal Investigator
NCT00629798	Hugo Castro-Malaspina, MD	Principal Investigator
NCT00630032	Mario Campone, MD	Principal Investigator
NCT00630097	Gantt Galloway, PharmD	Principal Investigator
NCT00631072	F. Stephen Hodi, MD	Principal Investigator
NCT00631072	Steven Balk, MD, PhD	Principal Investigator
NCT00631852	Elizabeth Peralta, M.D.	Principal Investigator
NCT00633165	Jack Singer, M.D.	Study Chair
NCT00633594	Ian W Flinn, M.D.	Study Chair
NCT00634231	Mark W Kieran, MD, PhD	Study Chair
NCT00634270	Brian Weiss, MD	Principal Investigator
NCT00634270	Bruce Korf, MD	Principal Investigator
NCT00634270	Roger Packer, MD	Study Director
NCT00634634	Antoinette Tan, MD	Principal Investigator
NCT00635557	Andrew P. Beelen, MD	Study Director
NCT00638547	Paul Orchard, MD	Principal Investigator
NCT00639639	Gordana Vlahovic, MD	Principal Investigator
NCT00639717	Gregory Yanik, MD	Principal Investigator
NCT00639743	Guy MEYER, MD PhD	Principal Investigator
NCT00639743	Stavros Konstantinides, MD, PhD	Principal Investigator
NCT00640003	Thomas O Crawford, M.D.	Principal Investigator
NCT00641147	Francis Giardiello	Principal Investigator
NCT00641160	George Tidmarsh, MD, PhD	Study Director
NCT00643097	Gordana Vlahovic, MD	Principal Investigator
NCT00644228	Brian G. Durie	Principal Investigator
NCT00644696	Rajen Mody, MD	Principal Investigator
NCT00645710	Jeffrey Wong	Principal Investigator
NCT00646230	Barry J. Maurer, MD, PhD	Study Chair
NCT00651261	Richard M. Stone, MD	Study Chair
NCT00652574	Anne S. Tsao, MD	Principal Investigator
NCT00653068	Alyssa Reddy, MD	Principal Investigator
NCT00654160	Robert McWilliams, MD	Principal Investigator
NCT00654732	Michelle Fanale, MD	Principal Investigator
NCT00655850	Francisco Robert, M.D.	Principal Investigator
NCT00655876	David H. Ilson, MD, PhD	Study Chair
NCT00655876	Mohan Suntharalingam, MD	Principal Investigator
NCT00656058	Ronald E Gress, M.D.	Principal Investigator
NCT00656786	Cliff Perlis, MD	Principal Investigator
NCT00656786	Jennifer Temel, MD	Principal Investigator
NCT00656786	Madeline Duvic, MD	Principal Investigator
NCT00656786	Maria Colavincenzo, MD	Principal Investigator
NCT00656786	Milan Anadkat, MD	Principal Investigator
NCT00656786	Serena Mraz, MD	Principal Investigator
NCT00656786	Vera Hirsh, MD	Principal Investigator
NCT00658814	Sucha Nand	Principal Investigator
NCT00658892	Svetomir Markovic, M.D., Ph.D.	Principal Investigator
NCT00658931	John L Shuster, MD	Principal Investigator
NCT00659828	Julio Licinio, MD	Principal Investigator
NCT00660101	Henry E Schea	Study Director
NCT00660283	Renato V LaRocca, MD	Principal Investigator
NCT00660673	Janet Benesh	Study Director
NCT00661193	Primo N. Lara, MD	Study Chair
NCT00661492	Mark T. Fleming, MD	Principal Investigator
NCT00662129	Donald W. Northfelt, MD, FACP	Study Chair
NCT00662506	Tracy Batchelor	Principal Investigator
NCT00662636	Charles Erlichman	Principal Investigator
NCT00663039	Henry Holcomb, M.D.	Principal Investigator
NCT00663689	Wu Yilong, MD	Principal Investigator
NCT00666562	Tracy Downs	Principal Investigator
NCT00667342	Michael Bishop, MD	Principal Investigator
NCT00667615	David Straus, MD	Principal Investigator
NCT00668421	Ronald Hoffman, MD	Principal Investigator
NCT00668850	Gerald Bernstein,, MD	Study Chair
NCT00668850	Jaime Davidson, MD	Study Director
NCT00668850	Philip Raskin, MD	Principal Investigator
NCT00668941	Robert Lindsay, MD, PhD	Principal Investigator
NCT00669162	Xinglei Shen, MD	Principal Investigator
NCT00669669	Hans-Peter Kiem	Principal Investigator
NCT00669734	Elizabeth Poplin	Principal Investigator
NCT00670748	Steven A Rosenberg, M.D.	Principal Investigator
NCT00672737	Anthony Doufas	Principal Investigator
NCT00673218	Robert G Townley, MD	Principal Investigator
NCT00674297	Doruk Erkan, MD	Principal Investigator
NCT00674297	Silvia Pierangeli, PhD	Principal Investigator
NCT00674479	Farhad Ravandi-Kashani, M.D.	Principal Investigator
NCT00674648	Susan Prockop, MD	Principal Investigator
NCT00675233	Hassan Arshad, MD	Principal Investigator
NCT00676975	Francis KL Chan, MD	Principal Investigator
NCT00677092	Jonathan Kay, MD	Principal Investigator
NCT00678730	Deepak D'Souza, M.D.	Principal Investigator
NCT00678743	Kevin C. Maki, PhD	Study Director
NCT00679029	Elizabeth Reed	Principal Investigator
NCT00679289	John Kirkwood, MD	Study Chair
NCT00682435	Andrew Chang, M.D.	Principal Investigator
NCT00683670	Gerald P. Linette, M.D., Ph.D.	Principal Investigator
NCT00683761	Adam Mamelak, MD	Principal Investigator
NCT00683761	Antonio Omuro, MD	Principal Investigator
NCT00683761	David Schiff, MD	Principal Investigator
NCT00683761	Edward Pan, MD	Principal Investigator
NCT00683761	Heather Jacene, MD	Principal Investigator
NCT00683761	Jan Drappatz, MD	Principal Investigator
NCT00683761	Jay-Jiguang Zhu, MD	Principal Investigator
NCT00683761	Jeffrey Olson, MD	Principal Investigator
NCT00683761	Jeffrey Raizer, MD	Principal Investigator
NCT00683761	John Fiveash, MD	Principal Investigator
NCT00683761	Karen Fink, MD	Principal Investigator
NCT00683761	Maciej Mrugala, MD	Principal Investigator
NCT00683761	Marc Chamberlain, MD	Principal Investigator
NCT00683761	Mark Malkin, MD	Principal Investigator
NCT00683761	Michael Edgeworth, MD	Principal Investigator
NCT00683761	Nimish Mobile, MD	Principal Investigator
NCT00683761	Patrick Wen, MD	Principal Investigator
NCT00683761	Richard Wahl, MD	Principal Investigator
NCT00683761	Sean Grimm, MD	Principal Investigator
NCT00683761	Steven Chmura, MD	Principal Investigator
NCT00683761	Steven Rosenfeld, MD	Principal Investigator
NCT00683761	Thomas Gribbin, MD	Principal Investigator
NCT00684294	Minal Barve, MD	Principal Investigator
NCT00684983	Tufia Haddad	Principal Investigator
NCT00685919	David Robertson, MD	Principal Investigator
NCT00686166	Cynthia G. Leichman, MD	Study Chair
NCT00686374	Andreas Lazar	Study Director
NCT00686972	Dariush Elahi, PhD	Principal Investigator
NCT00689572	Nassima Ait-Daoud Tiouririne, M.D.	Principal Investigator
NCT00689936	Christian Jacques, MD	Study Director
NCT00691015	Zaid Al-Kadhimi, MD	Study Chair
NCT00691106	Joseph Jorizzo, MD	Principal Investigator
NCT00693654	Alan Fleischer, MD	Principal Investigator
NCT00693693	Steve Feldman, MD, PhD	Principal Investigator
NCT00694915	Amillal Bhat, MD	Principal Investigator
NCT00694915	Anup Kundu, MD	Principal Investigator
NCT00694915	B. R. Srivastav, MD	Principal Investigator
NCT00694915	H. K. Moorthy, MD	Principal Investigator
NCT00694915	Jitendra Amlani, MD	Principal Investigator
NCT00694915	Kim Mammen, MD	Principal Investigator
NCT00694915	Mahesh Desai, MD	Principal Investigator
NCT00694915	N K Mohanty, MD	Principal Investigator
NCT00694915	Padmaraj Hegde, MD	Principal Investigator
NCT00694915	Purshottam K. Puri, MD	Principal Investigator
NCT00694915	Rajeev Sood, MD	Principal Investigator
NCT00694915	Shrawan K. Singh, MD	Principal Investigator
NCT00694915	Sujata Patwardhan, MD	Principal Investigator
NCT00694915	Sushil Bhatia, MD	Principal Investigator
NCT00694915	Yathish Kumar, MD	Principal Investigator
NCT00695409	Amrita Y. Krishnan, MD	Principal Investigator
NCT00695786	Felipe Samaniego, MD	Principal Investigator
NCT00695877	Dan Barouch, MD	Study Chair
NCT00695877	Lindsey Baden, MD	Study Chair
NCT00696449	Steve Feldman, MD, PhD	Principal Investigator
NCT00697463	Adi Cohen, MD	Study Director
NCT00697463	Elizabeth Shane, MD	Principal Investigator
NCT00697684	David E Avigan, MD	Principal Investigator
NCT00698815	Rebecca Heist	Principal Investigator
NCT00699491	Cynthia Ma	Principal Investigator
NCT00699556	Sherry A McKee, PhD	Principal Investigator
NCT00700076	Deepak C D'Souza, M.D.	Principal Investigator
NCT00700596	Mohini Ranganathan, M.D.	Principal Investigator
NCT00701233	Dennis Dykstra, MD	Principal Investigator
NCT00702962	Chandra P Belani, MD	Principal Investigator
NCT00703222	Chrystal U Louis, MD	Principal Investigator
NCT00703625	Joel Picus, M.D.	Principal Investigator
NCT00703664	Beata Holkova	Principal Investigator
NCT00705926	Eric S. Rosenberg, MD	Study Chair
NCT00705926	H.T. Banks, PhD	Principal Investigator
NCT00705926	Marie Davidian, PhD	Principal Investigator
NCT00706147	Merit Cudkowicz, MD, MSc	Principal Investigator
NCT00706147	Michael Benatar, MBChB, DPhil	Principal Investigator
NCT00707876	William Strauss, MD	Study Director
NCT00708773	Federico Innocenti, MD, PhD	Principal Investigator
NCT00708994	Deepak D'Souza, MD	Principal Investigator
NCT00709592	Amir Toor, MD	Principal Investigator
NCT00710697	Robert Earhart, MD, PhD	Study Director
NCT00710892	Malcolm K Brenner, MD	Principal Investigator
NCT00711243	Mary Mulcahy, MD	Principal Investigator
NCT00711412	Mary Mulcahy, MD	Principal Investigator
NCT00711828	Craig Reeder	Principal Investigator
NCT00712582	Craig Moskowitz, MD	Principal Investigator
NCT00713193	Spero R Cataland, MD	Principal Investigator
NCT00714246	Chandra P. Belani, MD	Principal Investigator
NCT00715442	Eric Jonasch, MD	Principal Investigator
NCT00715988	Robert Ward, M.D.	Principal Investigator
NCT00716976	David R. Freyer, DO, MS	Study Chair
NCT00718484	Jonathan J Lewis, MD, PhD	Study Director
NCT00720226	Robert A. Wise, MD	Principal Investigator
NCT00720356	Jeffrey J. Raizer, MD	Principal Investigator
NCT00720876	Robert Chen, MD	Principal Investigator
NCT00721513	Mercedes Porosnicu, MD	Principal Investigator
NCT00721799	John M. Buatti, M.D.	Principal Investigator
NCT00721799	Yusuf Menda, M.D.	Principal Investigator
NCT00722865	Jeremy Abramson, MD	Principal Investigator
NCT00723177	Sandra D Comer, PhD	Principal Investigator
NCT00723229	Christine Johnston, MD, MPH	Principal Investigator
NCT00723255	Edwin Alvarez	Principal Investigator
NCT00724568	Moshe Talpaz, MD	Principal Investigator
NCT00726232	Lance Leopold, MD	Study Director
NCT00726596	Mark Stein, MD	Principal Investigator
NCT00726687	Jonathan Lewis, MD	Study Chair
NCT00727948	Chris E Holmes, MD, PhD	Principal Investigator
NCT00728507	Susan Dorman, MD	Principal Investigator
NCT00728728	Christine Marx, MD MA	Principal Investigator
NCT00729118	Craig C. Hofmeister, MD	Principal Investigator
NCT00729586	Gini Fleming	Principal Investigator
NCT00729612	Gregory A. Otterson, MD	Principal Investigator
NCT00729716	Avner Yayon, PhD MD	Study Director
NCT00729911	Andrea Natale, MD	Principal Investigator
NCT00729911	Luigi Di Biase, MD, PhD	Principal Investigator
NCT00731302	C M Stein, M.D.	Principal Investigator
NCT00731731	Evanthia Galanis	Principal Investigator
NCT00731952	David R Jones, MD	Principal Investigator
NCT00732121	Richard E Pratley, MD	Principal Investigator
NCT00732498	Soham D Puvvada, MD	Principal Investigator
NCT00732654	Robert Wood, MD	Principal Investigator
NCT00733408	Jennifer Specht	Principal Investigator
NCT00733746	Peter W.T. Pisters, MD	Study Chair
NCT00736645	James L. Mohler, MD	Principal Investigator
NCT00736944	Douglas Adkins, M.D.	Principal Investigator
NCT00737529	Lei Zhang, MD	Study Director
NCT00740064	Benjamin Young, MD, PhD	Principal Investigator
NCT00740441	Greg Smith, MD	Principal Investigator
NCT00740441	Harry Drabkin, MD	Principal Investigator
NCT00740805	Mark Stein	Principal Investigator
NCT00741403	Avi Retter, M.D.	Principal Investigator
NCT00741403	Divis K Khaira, M.D.	Principal Investigator
NCT00741403	Karen Gelmon, M.D.	Principal Investigator
NCT00741403	Senzer Neil, M.D.	Principal Investigator
NCT00742404	James R. Berenson, MD	Principal Investigator
NCT00742560	Louie Naumovski, MD	Study Director
NCT00742573	Carlos Blanco, MD, PhD	Principal Investigator
NCT00743340	Erin Quirk, MD	Study Director
NCT00743496	Michael Bishop, MD	Principal Investigator
NCT00745134	Sunil Krishnan, MD	Principal Investigator
NCT00745420	Mary Horowitz, MD	Study Director
NCT00745615	Giancarlo Comi	Principal Investigator
NCT00746746	Adam I Riker, MD	Principal Investigator
NCT00748657	Jubilee Brown	Principal Investigator
NCT00749892	Arlene Siefker-Radtke, MD	Principal Investigator
NCT00749957	J Timothy Stout, MD, PhD, MBA	Principal Investigator
NCT00752206	Kristin Baird, MD	Principal Investigator
NCT00755040	Madan Jagasia, MD	Principal Investigator
NCT00756600	Andrew Davidson, MD	Principal Investigator
NCT00756600	Mary Ellen McCann, MD	Principal Investigator
NCT00756600	Neil Morton, MD	Principal Investigator
NCT00757549	Jann N. Sarkaria, MD	Study Chair
NCT00759291	Joshua A. Beckman, M.D.	Principal Investigator
NCT00759642	Priyanka Sharma, MD	Principal Investigator
NCT00759772	Pouneh K Fazeli, MD	Principal Investigator
NCT00759798	William Wierda, M.D.	Principal Investigator
NCT00760981	David Miklos	Principal Investigator
NCT00761722	Barry Skikne, MD, FACP, FCP (SA)	Study Director
NCT00764517	Stephen Spurgeon	Principal Investigator
NCT00765921	Ivana Kim, M.D.	Principal Investigator
NCT00766753	Frank Lieberman, MD	Principal Investigator
NCT00767624	Rachel Manber	Principal Investigator
NCT00767949	Glenn Stoller, MD	Study Director
NCT00769379	Melody Cobleigh	Principal Investigator
NCT00769483	Milind Javle, MD	Principal Investigator
NCT00769613	Kenneth G. Lucas, MD	Principal Investigator
NCT00770120	Linda Garland, MD	Study Chair
NCT00770120	Sai-Hong I. Ou, MD, PhD	Study Chair
NCT00770224	Jonathan W. Friedberg, MD	Study Chair
NCT00770224	Lisa Rimsza, MD	Study Chair
NCT00770224	Oliver W. Press, MD, PhD	Study Chair
NCT00770809	Lisa Carey	Principal Investigator
NCT00772486	Januario Castro, MD	Principal Investigator
NCT00772915	Shaji K. Kumar, MD	Study Chair
NCT00773422	Sherry A McKee, PhD	Principal Investigator
NCT00774345	Kenichi Takechita, MD	Study Director
NCT00775931	Paul Orchard, MD	Principal Investigator
NCT00776594	Mary-Ellen Taplin, MD	Principal Investigator
NCT00776867	Ira Dunkel, MD	Principal Investigator
NCT00777153	Jane Robertson	Study Director
NCT00777153	Tracy Batchelor, MD, MPH	Principal Investigator
NCT00777491	Cheryl T. Lee, MD	Study Chair
NCT00777491	Chin-Lee Wu, MD, PhD	Study Chair
NCT00777491	John J. Coen, MD	Principal Investigator
NCT00777491	Philip J. Saylor, MD	Study Chair
NCT00777673	Jasgit C. Sachdev, MD	Principal Investigator
NCT00777881	Robert Redner, MD	Principal Investigator
NCT00779168	Przemyslaw W. Twardowski, MD	Principal Investigator
NCT00780234	Robert L. Keith, MD	Principal Investigator
NCT00782288	Pamela L Zeitlin, MD, PhD	Principal Investigator
NCT00782574	J Ballmana Gelpi	Principal Investigator
NCT00782574	Jane Robertson, BSc, MBCHB, MD	Study Director
NCT00782574	Judy E Garber	Principal Investigator
NCT00783367	Stephen J Schuster, MD	Principal Investigator
NCT00785291	Hope Rugo	Principal Investigator
NCT00787059	Amit Patel, MD	Principal Investigator
NCT00787059	Clyde W Yancy, MD	Principal Investigator
NCT00787059	David R Murray, MD	Principal Investigator
NCT00787059	Eric D Adler, MD	Principal Investigator
NCT00787059	H. Kirk Hammond, MD	Study Director
NCT00787059	Jay H Traverse, MD	Principal Investigator
NCT00787059	Matthew W Watkins, MD	Principal Investigator
NCT00787059	William Penny, MD	Principal Investigator
NCT00787969	David J. Inwards, MD	Study Chair
NCT00788112	Laura Esserman, MD, MBA	Principal Investigator
NCT00788125	Judith K. Sato, MD	Principal Investigator
NCT00788684	Mack Mabry, MD	Study Director
NCT00788775	F. Stephen Hodi, MD	Principal Investigator
NCT00789581	Denise A Yardley, M.D.	Study Chair
NCT00789633	Gaël Deplanque, MD	Principal Investigator
NCT00789776	Brenda Sandmaier	Principal Investigator
NCT00789958	Edgar Ben-Josef, MD	Principal Investigator
NCT00790010	F. Stephen Hodi, MD	Principal Investigator
NCT00790335	Clive Kearon, MB, MRCP, FRCP(C), PhD	Principal Investigator
NCT00790335	Samuel Z Goldhaber, M.D.	Study Chair
NCT00790335	Suresh Vedantham, M.D.	Principal Investigator
NCT00790582	Robert G Miller, MD	Study Director
NCT00790842	Joseph R. Mikhael, MD	Study Chair
NCT00790868	David F Tolin, PhD	Principal Investigator
NCT00790868	Mark H Pollack, MD	Principal Investigator
NCT00790868	Michael W Otto, PhD	Study Chair
NCT00791037	Mary Disis	Principal Investigator
NCT00791076	Dariush Elahi, PhD	Principal Investigator
NCT00792142	Firoozeh Sahebi, MD	Principal Investigator
NCT00792701	Ralph G. Zinner, MD	Study Chair
NCT00792948	Farhad Ravandi-Kashani	Principal Investigator
NCT00793572	Marco Mielcarek	Principal Investigator
NCT00794339	David A. Mankoff, MD, PhD	Study Chair
NCT00794339	Farrokh Dehdashti, MD	Principal Investigator
NCT00794950	Alon Weizer, MD	Principal Investigator
NCT00796562	Heather Symons, M.D.	Principal Investigator
NCT00796978	Cynthia Owusu, MD, MSC	Principal Investigator
NCT00798655	Robert Ferris, MD	Principal Investigator
NCT00798720	Tien Hoang, M.D.	Principal Investigator
NCT00799110	David Avigan, MD	Principal Investigator
NCT00799617	Peter J Snyder, MD	Principal Investigator
NCT00802412	Robert M. Anthenelli, MD	Principal Investigator
NCT00803972	Jolene K Berg, MD	Principal Investigator
NCT00804336	Jennifer Ang Chan, MD, MPH	Principal Investigator
NCT00805129	Dean Bajorin, MD	Principal Investigator
NCT00807365	Dariush Elahi, PhD	Principal Investigator
NCT00807365	Kenneth L. Minaker, MD	Principal Investigator
NCT00807586	Daniel P Melby, MD	Principal Investigator
NCT00807599	Hani Hassoun, MD	Principal Investigator
NCT00807768	Marcus Randall	Principal Investigator
NCT00807963	Emanuel P DeNoia, MD	Principal Investigator
NCT00808314	Timothy M Bateman, MD	Principal Investigator
NCT00808639	Toni Choueiri, MD	Principal Investigator
NCT00810797	George Somlo, MD	Principal Investigator
NCT00810888	Edward C. Jauch, MD, MS	Principal Investigator
NCT00810888	Matthew L. Flaherty, MD	Principal Investigator
NCT00813293	Rebecca A Miksad, MD, MPH	Principal Investigator
NCT00813423	Janice Mehnert	Principal Investigator
NCT00813826	Kevin Pojasek, PhD	Study Director
NCT00814294	David Orloff, MD	Study Director
NCT00814294	Len Rosenberg, PhD, RPh	Study Director
NCT00815035	Wesley Burks, MD	Principal Investigator
NCT00816595	Jose F. Francisco, M.D.	Principal Investigator
NCT00816595	Tait D. Shanafelt, MD	Study Chair
NCT00819546	Richard Stone, MD	Principal Investigator
NCT00820170	Monica Fornier, MD	Principal Investigator
NCT00820872	Edith A. Perez, MD	Study Chair
NCT00821964	Lupe Salazar	Principal Investigator
NCT00822120	Oliver W. Press, MD, PhD	Study Chair
NCT00822848	Christopher W. Ryan, MD	Principal Investigator
NCT00823212	Peter M Maurer, MPH	Study Director
NCT00823797	Maciej Mrugala	Principal Investigator
NCT00824135	Brandon Triplett, MD	Principal Investigator
NCT00824200	Theodore Johnson II, MD, MPH	Principal Investigator
NCT00824993	Huifang Lu, MD, PHD	Principal Investigator
NCT00825201	Mihaela Cristea, MD	Principal Investigator
NCT00825201	Mihaela Cristea, MD	Study Chair
NCT00825656	Martha White, MD	Principal Investigator
NCT00825721	Reeta Gurung, MD	Principal Investigator
NCT00825721	Sanduk Ruit, MD	Principal Investigator
NCT00825942	Ira Wong, MD	Study Director
NCT00826202	Daniel C Javitt, MD, PhD	Principal Investigator
NCT00826241	Marta Penas-Prado, MD	Principal Investigator
NCT00826540	Axel Grothey, MD	Study Chair
NCT00827359	David F McDermott, MD	Principal Investigator
NCT00830544	Fernando Cabanillas, MD	Principal Investigator
NCT00831766	Jeffrey Lancet, M.D.	Principal Investigator
NCT00831792	Paul Corn, MD, PHD	Principal Investigator
NCT00833261	Lucien A. Nedzi, MD	Principal Investigator
NCT00834093	Jochen Lorch, MD	Principal Investigator
NCT00834665	Carl H June, MD	Study Chair
NCT00837928	John C. Grecula, MD	Principal Investigator
NCT00838435	Suyash Prasad, M.D.	Study Director
NCT00838656	Christopher Poole, MD	Principal Investigator
NCT00839956	Leona Holmberg	Principal Investigator
NCT00840931	Javier Pinilla, M.D., Ph.D.	Principal Investigator
NCT00841074	Catherine J Binkley, DDS, PhD	Principal Investigator
NCT00841802	Robert P Schleimer, PhD	Principal Investigator
NCT00843531	Emily K. Bergsland, MD	Principal Investigator
NCT00843882	Alan List	Principal Investigator
NCT00844831	John Wo, MD	Principal Investigator
NCT00846430	Albert S Cornelius, MD	Principal Investigator
NCT00847171	Leisha A. Emens, MD, PhD	Principal Investigator
NCT00847912	Martin A. Weinstock, MD	Study Chair
NCT00848328	Joseph M. Tuscano, MD	Principal Investigator
NCT00849121	Douglas McNeel, MD	Principal Investigator
NCT00851877	Hak Choy, MD	Principal Investigator
NCT00852787	Deepak Malhotra, MD, PhD	Principal Investigator
NCT00853125	Roger Strair, MD, PhD	Principal Investigator
NCT00853580	Jonathan Payne, MD	Study Director
NCT00853580	Kathryn North, MD	Principal Investigator
NCT00853580	Maria Acosta, MD	Study Director
NCT00856245	Siddhartha Ganguly, MD	Principal Investigator
NCT00856401	John P Bilezikian, MD	Principal Investigator
NCT00856492	Zeina Nahleh, MD	Principal Investigator
NCT00857025	Marianna Koczywas, MD	Principal Investigator
NCT00857389	Laura L. Worth, MD, PhD	Principal Investigator
NCT00857545	Paul Sabbatini	Principal Investigator
NCT00858117	Olga Frankfurt, MD	Principal Investigator
NCT00858429	Mary Mulcahy, MD	Principal Investigator
NCT00859222	Patrick Y. Wen, MD	Principal Investigator
NCT00859456	Robert N Taub, MD, PhD	Principal Investigator
NCT00859716	Mohamed Al-Ibrahim, MD	Principal Investigator
NCT00859937	Stuart Wong	Principal Investigator
NCT00860379	Maggie L Dylewski, PhD,RD	Principal Investigator
NCT00860522	David F Claxton, MD	Principal Investigator
NCT00861406	Wen-Jen Hwu, MD, PhD	Principal Investigator
NCT00861913	Amy Weise	Principal Investigator
NCT00863369	Leslie Popplewell, MD	Principal Investigator
NCT00865566	Magdalena Sobieszczyk	Study Chair
NCT00865566	Michael Yin	Study Chair
NCT00865566	Scott Hammer	Study Chair
NCT00866749	Michael E. Rytting, M.D.	Principal Investigator
NCT00866879	Lorenzo Gallon, MD	Principal Investigator
NCT00866918	John Gregory, MD	Principal Investigator
NCT00867048	Abdel Babiker, PhD	Study Chair
NCT00867048	Fred Gordin, MD	Study Chair
NCT00867048	James D Neaton, PhD	Principal Investigator
NCT00867048	Jens Lundgren, MD, DMSc	Study Chair
NCT00867048	Sean Emery, PhD	Study Chair
NCT00867217	Qamar J Khan, MD	Principal Investigator
NCT00867529	David Maloney	Principal Investigator
NCT00868114	Emmanuel E Zervos, MD	Principal Investigator
NCT00869024	Ganesh Raveendran, MD	Principal Investigator
NCT00869206	Andrew L. Himelstein, MD	Study Chair
NCT00869401	Nadia N. Laack, MD	Study Chair
NCT00870779	David W Roberts, MD	Principal Investigator
NCT00870779	Keith Paulsen, PhD	Principal Investigator
NCT00870987	Judith Epstein, MD	Principal Investigator
NCT00871923	James Welsh, MD	Principal Investigator
NCT00872911	Elena Volpi, MD,PhD	Principal Investigator
NCT00872989	Robert L. Coleman, MD	Study Chair
NCT00873093	Terzah Horton	Principal Investigator
NCT00873275	Lily L. Lai, MD	Principal Investigator
NCT00876902	Stefan Hemmerich, PhD	Study Director
NCT00877500	Funda Meric-Bernstam, MD	Principal Investigator
NCT00878163	Charles Erlichman	Principal Investigator
NCT00878904	Pamela N. Munster, MD	Principal Investigator
NCT00879177	William B White, M.D.	Principal Investigator
NCT00879489	Paul O. Schwarzenberger, M.D.	Principal Investigator
NCT00880464	Beth Overmoyer, MD	Principal Investigator
NCT00880581	Ronald Levy	Principal Investigator
NCT00880919	S. Charles Schulz, MD	Principal Investigator
NCT00881361	Judy Boughey, MD	Study Chair
NCT00881556	Angela Christiano, PhD	Principal Investigator
NCT00883129	Donald P. Tashkin, MD	Principal Investigator
NCT00883129	Michael D. Roth, MD	Principal Investigator
NCT00883129	Robert M. Elashoff, PhD	Principal Investigator
NCT00883298	Michael A. Badurddoja, MD	Principal Investigator
NCT00884312	Kanya Rajangam, MD	Study Director
NCT00884741	Mark Gilbert	Principal Investigator
NCT00885326	Julia L. Glade-Bender, MD	Principal Investigator
NCT00885495	Carl J Fichtenbaum, MD	Principal Investigator
NCT00885664	Carl J Fichtenbaum, MD	Principal Investigator
NCT00885703	Robert A. Larsen, MD	Study Chair
NCT00885703	Umesh G. Lalloo, MD, FRCP	Study Chair
NCT00886028	Elena Arechaga Ocampo, PhD.	Study Chair
NCT00886028	Enrique Estrada Lobato, M.D.	Study Chair
NCT00886028	Luis Alberto Medina Velázquez, PhD.	Study Chair
NCT00886028	Luisa Geraldine Villanueva Rodríguez, M.D	Study Chair
NCT00886028	Miguel Angel Ríos Trejo, M.D.	Study Chair
NCT00886028	Victoria López Rodrígez, Q.F.B.	Study Chair
NCT00886691	William P. Tew, MD	Study Chair
NCT00887159	Chandra Belani	Principal Investigator
NCT00887536	Norman Wolmark, MD	Principal Investigator
NCT00888173	Matthew Powell	Principal Investigator
NCT00888628	James F Markmann, MD, PhD	Principal Investigator
NCT00889408	Verokina Bachanova, MD	Principal Investigator
NCT00890032	Gordana Vlahovic, MD	Principal Investigator
NCT00890617	Frank A. Baciewicz, MD	Principal Investigator
NCT00890786	Maryam Fouladi, MD	Principal Investigator
NCT00890825	Dr Pasi Janne	Principal Investigator
NCT00890825	Gabriella Mariani	Study Director
NCT00891527	Kathy J Jenkins, MD, MPH	Principal Investigator
NCT00892177	Evanthia Galanis, MD	Study Chair
NCT00892736	Shannon Puhalla	Principal Investigator
NCT00895661	Jeremy Abramson, MD	Principal Investigator
NCT00899431	Issa F. Khouri, MD, BS	Study Chair
NCT00899847	Wen-Kai Weng	Principal Investigator
NCT00900809	Michael Boyiadzis, MD	Principal Investigator
NCT00901069	Hayslip W John, MD	Principal Investigator
NCT00902018	James B Bussel, MD	Principal Investigator
NCT00902577	Elizabeth Gerstner	Principal Investigator
NCT00903461	Julie Bauman, MD	Principal Investigator
NCT00903968	Irene Ghobrial, MD	Principal Investigator
NCT00904033	Luke J Peppone, Ph.D.	Principal Investigator
NCT00904345	Shruti Jolly, MD	Principal Investigator
NCT00906945	Geoffrey L. Uy, M.D.	Principal Investigator
NCT00907166	Avi Retter, M.D.	Principal Investigator
NCT00907166	Neil Senzer, M.D.	Principal Investigator
NCT00908791	Margit M McGowan, DO	Principal Investigator
NCT00909090	Billy R Hammond, Ph.D.	Principal Investigator
NCT00909831	Ravi Amaravadi, MD	Principal Investigator
NCT00910910	Oliver Kong, MD	Study Director
NCT00911820	Peter C. Enzinger, MD	Principal Investigator
NCT00912223	Mary Horowitz, MD, MS	Study Director
NCT00912340	Elisavet Paplomata, MD	Principal Investigator
NCT00912691	Eugene Arnold, MD	Principal Investigator
NCT00914940	Marie Bleakley, MD	Principal Investigator
NCT00914940	Warren Shlomchik, MD	Principal Investigator
NCT00915005	Zhongxing Liao, MD	Study Chair
NCT00915694	Jay F. Dorsey, MD, PhD	Principal Investigator
NCT00916123	Scott Tagawa, M.D.	Principal Investigator
NCT00916409	Eric T. Wong, MD	Study Director
NCT00916409	Herbert H. Engelhard, MD, PhD	Study Director
NCT00916409	Manfred Westphal, Prof. MD	Study Director
NCT00916409	Philip H. Gutin, MD	Study Director
NCT00916409	Roger Stupp, MD	Study Director
NCT00916578	Wendy Woodward, MD, PHD	Study Chair
NCT00916747	Mark Kieran, MD, PhD	Principal Investigator
NCT00917462	David Ilson, MD	Principal Investigator
NCT00918333	Shaji Kumar	Principal Investigator
NCT00918723	Mazyar Shadman	Principal Investigator
NCT00920023	Ralph Weissleder, MD, PhD	Principal Investigator
NCT00920699	Christopher A Ross, MD, PhD	Principal Investigator
NCT00920699	Kevin M Biglan, MD, MPH	Principal Investigator
NCT00921310	Maria Baggstrom, M.D.	Principal Investigator
NCT00921557	George K. Siberry, MD	Study Chair
NCT00922883	Cynthia E Dunbar, M.D.	Principal Investigator
NCT00923247	Ravi A Madan, M.D.	Principal Investigator
NCT00923351	John Glod, M.D.	Principal Investigator
NCT00923364	Dennis D Hickstein, M.D.	Principal Investigator
NCT00923845	Daniel H Fowler, M.D.	Principal Investigator
NCT00924326	Steven A Rosenberg, M.D.	Principal Investigator
NCT00924703	Celeste Decker, MD	Study Director
NCT00925314	Gregory Daniels, MD, PhD	Principal Investigator
NCT00926380	Benjamin Z Leder, MD	Principal Investigator
NCT00926380	Robert M Neer, MD	Principal Investigator
NCT00928135	Jan L Launspach, R.N., CCRC	Study Chair
NCT00928135	Joseph Zabner, M.D.	Principal Investigator
NCT00928135	Lakshmi Durairaj, M.D.	Study Director
NCT00929214	Eric A. Strom, MD, BS	Principal Investigator
NCT00929344	Barbara J Mason, Ph.D.	Principal Investigator
NCT00930579	Dawn L Hershman, MD	Principal Investigator
NCT00931840	Richard M. Goldberg, MD	Principal Investigator
NCT00932113	Alice B. Gottlieb, M.D., PhD.	Principal Investigator
NCT00932828	Arvil W Burks, MD	Principal Investigator
NCT00934427	Jeff Gregory, MD	Study Director
NCT00934440	Peter J Van Veldhuizen, MD	Principal Investigator
NCT00934895	Deborah L. Toppmeyer, MD	Principal Investigator
NCT00936390	Alvaro A. Martinez, MD, FACR	Study Chair
NCT00936611	Irene Ghobrial, MD	Principal Investigator
NCT00936858	Jochen Lorch, MD	Principal Investigator
NCT00937937	Christopher Lao	Principal Investigator
NCT00938470	Steven R. Alberts, MD	Study Chair
NCT00939770	Yael P. Mosse, MD	Study Chair
NCT00939822	Cynthia M. Carlsson, MD, MS	Principal Investigator
NCT00940316	Al Benson, MD	Principal Investigator
NCT00940771	Janice Piatt, MD	Principal Investigator
NCT00941720	Ronald M. Sobecks, MD	Principal Investigator
NCT00942331	Jonathan Rosenberg	Principal Investigator
NCT00942357	Daniela Matei	Principal Investigator
NCT00942578	William L Dahut, M.D.	Principal Investigator
NCT00943319	Andrew Artz, MD	Principal Investigator
NCT00943618	Paul M Cinciripini, PhD	Principal Investigator
NCT00943943	Michael Andreeff, MD, PhD	Principal Investigator
NCT00944047	Qamar Khan, MD	Principal Investigator
NCT00944749	Danielle M Townsley, M.D.	Principal Investigator
NCT00945815	Anjali Advani, MD	Study Chair
NCT00946088	Deirdre Judith Lyell	Principal Investigator
NCT00946270	Srdan Verstovsek, MD	Principal Investigator
NCT00946673	Griffith R. Harsh	Principal Investigator
NCT00946712	Roy Herbst	Principal Investigator
NCT00947011	Dariush Elahi, PhD	Principal Investigator
NCT00948064	Guillermo Garcia-Manero, MD	Principal Investigator
NCT00948688	Lawrence Blaszkowsky, MD	Principal Investigator
NCT00948740	Jie Tang, M.D., M.Sc	Principal Investigator
NCT00948753	David Porter, MD	Principal Investigator
NCT00948922	Melissa Alsina, MD	Principal Investigator
NCT00949949	Brian Costello	Principal Investigator
NCT00949988	Januario Castro, M.D.	Principal Investigator
NCT00949988	Thomas J Kipps, M.D., Ph.D.	Principal Investigator
NCT00950248	Bibiana Bielekova, M.D.	Principal Investigator
NCT00951496	Joan Walker	Principal Investigator
NCT00954174	Matthew Powell	Principal Investigator
NCT00954226	William N. William Jr., MD	Study Chair
NCT00954278	Anne M Traynor, M.D.	Principal Investigator
NCT00954707	Daniel Simon, M.D.	Principal Investigator
NCT00954707	David Kandzari, M.D.	Principal Investigator
NCT00955006	Janine Maenza	Study Chair
NCT00956332	Sam L. Teichman, MD	Study Director
NCT00957359	Anthony Bossis, PhD	Study Chair
NCT00957359	Jeffrey Guss, MD	Study Director
NCT00957359	Stephen Ross, MD	Principal Investigator
NCT00957853	William N. William Jr., MD	Study Chair
NCT00960752	Richard Royal, MD	Principal Investigator
NCT00961220	Kevin Cooper	Principal Investigator
NCT00961961	John M Zajecka, MD	Principal Investigator
NCT00961961	Robert J. DeRubeis, PhD	Principal Investigator
NCT00962845	Janice M. Mehnert, MD	Principal Investigator
NCT00963105	Kenichi Takeshita, M.D., MPH	Study Director
NCT00963274	Amy Kimball, MD, PhD	Principal Investigator
NCT00963274	Beata Holkova, MD	Principal Investigator
NCT00963274	Nishitha Reddy, MBBS	Principal Investigator
NCT00963274	Sho Ma, MD, PhD	Principal Investigator
NCT00963274	Steven Grant, MD	Study Chair
NCT00963274	Thomas C. Shea, MD	Principal Investigator
NCT00963781	David E Kandzari, MD	Principal Investigator
NCT00963781	Eric J. Topol, MD	Principal Investigator
NCT00963781	Paul S. Teirstein, MD	Principal Investigator
NCT00964080	Jaffer A. Ajani, MD	Principal Investigator
NCT00964353	David O Meltzer, MD, PhD	Principal Investigator
NCT00964886	Joseph H Atkinson, MD	Principal Investigator
NCT00965250	Giuseppe Giaccone, M.D.	Principal Investigator
NCT00966654	Dariush Elahi, PhD	Principal Investigator
NCT00966693	Jatin J. Shah, MD	Study Chair
NCT00967005	Jon E Grant, MD, JD, MPH	Principal Investigator
NCT00967005	Marc N Potenza, MD, PhD	Principal Investigator
NCT00967369	Michelle A. Fanale, MD	Study Chair
NCT00968110	Dale Umetsu, MD	Principal Investigator
NCT00968760	Partow Kebriaei, MD	Study Chair
NCT00970905	Steven Ades, MD MSc	Principal Investigator
NCT00971737	Leisha A. Emens, MD, PhD	Principal Investigator
NCT00972478	Daniel Persky	Principal Investigator
NCT00972933	Ahmad Tarhini, MD	Principal Investigator
NCT00974142	Michael Donahoe, MD	Principal Investigator
NCT00975819	Denise M Adams, MD	Principal Investigator
NCT00976131	Heather Greenlee, ND, PhD	Principal Investigator
NCT00976248	Steven Treon, MD	Principal Investigator
NCT00976573	Robert McWilliams, MD	Study Chair
NCT00977470	Lecia Sequist, MD	Principal Investigator
NCT00977574	Carol Aghajanian	Principal Investigator
NCT00977691	Courtney D Fitzhugh, M.D.	Principal Investigator
NCT00979212	Martin J. Edelman, MD	Principal Investigator
NCT00979992	John Chan	Principal Investigator
NCT00980395	Soham D Puvvada, MD	Principal Investigator
NCT00981747	Alicia K Gerke, MD	Principal Investigator
NCT00982787	Siegward M Elsas, M.D.	Principal Investigator
NCT00982982	Deepak C D'Souza, M.D	Principal Investigator
NCT00983580	Frank Sinicrope	Principal Investigator
NCT00985517	Raymond T Bartus, Ph.D.	Study Director
NCT00986609	Joseph Baar, MD	Principal Investigator
NCT00987389	David Jayne, MD	Principal Investigator
NCT00987389	Michael Walsh, MD	Principal Investigator
NCT00987389	Peter Merkel, MD, MPH	Principal Investigator
NCT00987480	Faird Boulad, MD	Principal Investigator
NCT00987766	Laura Goff, MD	Principal Investigator
NCT00987948	Cecilia M Shikuma, M.D.	Principal Investigator
NCT00988052	Giancarlo Comi, Prof., MD	Principal Investigator
NCT00988208	Debora Barton, MD	Study Director
NCT00988429	Patrício Soares-da-Silva, MD, PHD	Study Director
NCT00988715	Brenda Sandmaier	Principal Investigator
NCT00989651	Katherine Bell-McGuinn	Principal Investigator
NCT00992446	Leona Holmberg	Principal Investigator
NCT00993759	Ronald Turner, MD	Principal Investigator
NCT00994643	Matthew Carabasi, MD	Principal Investigator
NCT00995150	Andrea Olariu, MD, PhD	Study Director
NCT00996073	Roger Brown	Study Director
NCT00997035	Nisha Acharya, MD, MS	Principal Investigator
NCT00997035	NV Prajna, DNB, FRC Ophth	Principal Investigator
NCT00997035	Tom Lietman, MD	Principal Investigator
NCT00997334	David Jackman, MD	Principal Investigator
NCT00998010	Albert Lai, MD, PhD	Principal Investigator
NCT00999609	Albert M Maguire, MD	Principal Investigator
NCT00999609	Stephen R Russell, MD	Principal Investigator
NCT00999804	Mothaffar Rimawi, MD	Principal Investigator
NCT01000051	Uday Popat, MD	Study Chair
NCT01000285	Lee Ratner, M.D., Ph.D.	Principal Investigator
NCT01000987	Sherry A McKee, PhD	Principal Investigator
NCT01001442	Kenneth C. Anderson, MD	Study Director
NCT01001754	Jan Hillson, MD	Study Director
NCT01002547	Kenneth Cusi, PhD	Principal Investigator
NCT01002755	Alessandra Ferrajoli, MD	Study Chair
NCT01002924	Siu-Long Yao	Study Director
NCT01003912	Joanne Kurtzberg, MD	Principal Investigator
NCT01004172	Nancy Lin, MD	Principal Investigator
NCT01004874	Annick Desjardins, MD, FRCPC	Principal Investigator
NCT01004978	Jean-Francois (Jeff) Geschwind	Principal Investigator
NCT01005108	Jun J Mao, MD, MSCE	Principal Investigator
NCT01005472	Bartosz Chmielowski, MD	Principal Investigator
NCT01005576	Shalini Shenoy, MD	Principal Investigator
NCT01005797	Harry Drabkin, MD	Principal Investigator
NCT01007630	Grace S Liang, MD	Principal Investigator
NCT01008150	Norman Wolmark, MD	Principal Investigator
NCT01008917	Alan P Venook, MD	Principal Investigator
NCT01008917	Robin K Kelley, MD	Principal Investigator
NCT01009437	David A. Potter, M.D., Ph.D.	Principal Investigator
NCT01009788	Steven Isakoff, MD, PhD	Principal Investigator
NCT01009918	Maya Guglin, MD, PhD	Study Chair
NCT01009918	Pamela N. Munster, MD	Study Chair
NCT01010126	Charles Erlichman	Principal Investigator
NCT01010217	Stefan Ciurea, MD	Study Chair
NCT01011010	Hanna H. Sanoff, MD	Principal Investigator
NCT01011218	Oxana RG Palesh, PhD, MPH	Principal Investigator
NCT01011374	Lawrence J Singerman, MD	Principal Investigator
NCT01011439	Anna Petroccione, MD	Study Director
NCT01011439	Arun Rajan, MD.	Principal Investigator
NCT01011439	Benjamin Besse, MD	Principal Investigator
NCT01011439	Glen Weiss, MD	Principal Investigator
NCT01011439	Julien Mazières, MD	Principal Investigator
NCT01011439	Marina C Garassino, MD	Principal Investigator
NCT01011439	Silvia Novello, MD	Principal Investigator
NCT01013285	Albert Lai, MD	Principal Investigator
NCT01013441	Chitra Hosing, MD	Principal Investigator
NCT01013441	Stephen J Schuster, MD	Principal Investigator
NCT01013870	Claudia S Robertson, MD	Principal Investigator
NCT01014598	Chukwumere Nwogu	Principal Investigator
NCT01015222	Filip Janku, MD,PHD	Principal Investigator
NCT01015833	Ghassan Abou-Alfa	Principal Investigator
NCT01016730	Erin Reid	Principal Investigator
NCT01016769	David Pfister, MD	Principal Investigator
NCT01017601	Julian Molina, MD, PhD	Study Chair
NCT01019187	Michael Perlis, MD	Principal Investigator
NCT01020539	Monica Bhatia, MD	Principal Investigator
NCT01021241	Alan Kivitz, MD	Principal Investigator
NCT01021241	Anthony S Fiorino, MD, PhD	Study Director
NCT01022021	Siddhartha Ganguly, MD	Principal Investigator
NCT01022138	Amy Weise, M.D.	Principal Investigator
NCT01022580	Roberta A Ballard, MD	Principal Investigator
NCT01023477	Kirsten H Edmiston, MD, FACS	Principal Investigator
NCT01023477	Priscilla McAuliffe, MD, PhD	Principal Investigator
NCT01024010	Han W. Tun, M.D.	Principal Investigator
NCT01024010	Jose Leis, M.D.	Principal Investigator
NCT01024010	Tait Shanafelt, M.D.	Study Chair
NCT01024387	Matthew Kulke, MD	Principal Investigator
NCT01025427	Hiroyu Hatano, MD	Principal Investigator
NCT01025453	Eric Sherman, MD	Principal Investigator
NCT01026220	Kara Kelly, MD	Principal Investigator
NCT01026493	H. Ian Robins, MD, PhD	Principal Investigator
NCT01026987	John DiPersio, M.D., Ph.D.	Principal Investigator
NCT01027000	Edwin P. Alyea, MD	Study Chair
NCT01027702	Andrew Gilman, MD	Principal Investigator
NCT01027754	Shadi Nahvi, M.D., M.S.	Principal Investigator
NCT01027949	Kevin Laliberte, PharmD	Study Director
NCT01029054	Mark Kaminski, M.D.	Principal Investigator
NCT01029262	Albert Hoenekopp, MD	Study Director
NCT01030900	Wyndham H Wilson, M.D.	Principal Investigator
NCT01031446	Ingrid Mayer, MD	Principal Investigator
NCT01034254	Mark C Steinhoff, MD	Principal Investigator
NCT01034631	Thomas Hutson, D.O.	Study Chair
NCT01036087	Naoto Ueno, MD, PHD	Study Chair
NCT01036113	Joyce A O'Shaughnessy, MD	Principal Investigator
NCT01036321	Nagi Kumar, Ph.D.	Principal Investigator
NCT01036594	Charles J. Ryan, MD	Principal Investigator
NCT01037621	Mary Jane Burton, M.D.	Principal Investigator
NCT01038388	Jonathan Kaufman, MD	Principal Investigator
NCT01038583	John McNeil, MBBS, PHD	Principal Investigator
NCT01038583	Richard Grimm, MD, PHD	Principal Investigator
NCT01040000	Philip M Arlen, M.D.	Study Director
NCT01040221	Eric Hollander, MD	Principal Investigator
NCT01041274	Donald C Goff, MD	Principal Investigator
NCT01041521	Christine A Wanke, MD	Principal Investigator
NCT01041781	Martin J. Edelman, MD	Study Chair
NCT01042158	Paul Hassoun, MD	Principal Investigator
NCT01042535	Hatem Soliman	Principal Investigator
NCT01043640	Paul Orchard, MD	Principal Investigator
NCT01044238	Maureen Hillhouse, Ph.D.	Study Director
NCT01044238	Walter Ling, M.D.	Principal Investigator
NCT01044433	Corey Langer	Principal Investigator
NCT01044745	Robert Bociek	Principal Investigator
NCT01046604	Ethan J Anderson, PhD	Principal Investigator
NCT01047319	Prof. Timothy Vollmer, MD	Principal Investigator
NCT01047722	Jeffrey A Klein, MD	Principal Investigator
NCT01048827	Thomas Martin, MD	Study Chair
NCT01049451	Regina R Berkovich, MD, PhD	Principal Investigator
NCT01049841	Ira Dunkel, MD	Principal Investigator
NCT01049854	Mitchell S Cairo, MD	Principal Investigator
NCT01049945	Shaji K. Kumar, M.D.	Study Chair
NCT01049945	Vivek Roy, M.D.	Principal Investigator
NCT01050647	Yasser Y El-Sayed, MD	Principal Investigator
NCT01050842	Erik P. Castle, M.D.	Study Chair
NCT01051557	Thomas Kaley	Principal Investigator
NCT01054079	K.C. Balaji, MD	Principal Investigator
NCT01054144	Rachid Baz, M.D.	Principal Investigator
NCT01055028	Kristen N. Ganjoo	Principal Investigator
NCT01056276	Jesus Berdeja, M.D.	Study Chair
NCT01056393	William Towner, MD	Principal Investigator
NCT01056965	Adam L. Boxer, M.D., Ph.D.	Principal Investigator
NCT01057225	Joseph R. Mikhael, M.D.	Study Chair
NCT01057862	Marc N Potenza, M.D., Ph.D.	Principal Investigator
NCT01058239	Jeremy Abramson, MD	Principal Investigator
NCT01058655	Brian Wolpin, MD	Principal Investigator
NCT01058941	Lynne Shinto, ND, MPH	Principal Investigator
NCT01059929	John P Kress, MD	Principal Investigator
NCT01060384	Julie M Vose	Principal Investigator
NCT01061411	Saby George	Principal Investigator
NCT01061775	M. Jennifer Abuzzahab, MD	Principal Investigator
NCT01061840	Minal Barve, MD	Principal Investigator
NCT01062399	Prakash Chinnaiyan, MD	Principal Investigator
NCT01062425	Tracy Batchelor	Principal Investigator
NCT01062451	Thomas F Newton, M.D.	Principal Investigator
NCT01064479	William N. William Jr., MD	Study Chair
NCT01064648	Anne Tsao	Principal Investigator
NCT01065129	Mark Schroeder, M.D.	Principal Investigator
NCT01065467	F. Stephen Hodi, MD	Principal Investigator
NCT01065662	Susana Campos, MD	Principal Investigator
NCT01065844	John M. Buatti, M.D.	Principal Investigator
NCT01066637	Robert J Gropler, MD	Principal Investigator
NCT01067144	Ian R Carroll	Principal Investigator
NCT01067287	David Avigan, MD	Principal Investigator
NCT01067469	John DeGroot, MD	Study Chair
NCT01068249	Robert Coleman, MD	Study Chair
NCT01068327	Chi Lin	Principal Investigator
NCT01068769	Suzanne George, MD	Principal Investigator
NCT01069510	Craig Broberg, MD	Principal Investigator
NCT01071941	Kenneth K. Tanabe, MD	Principal Investigator
NCT01074047	C L Beach, PharmD	Study Director
NCT01074411	Don Dizon	Principal Investigator
NCT01074554	Wonder P Drake, MD	Principal Investigator
NCT01074970	Kathy D. Miller, M.D.	Study Chair
NCT01075321	Craig Reeder, M.D.	Study Chair
NCT01075321	Thomas E. Witzig, M.D.	Principal Investigator
NCT01075412	Michael M Graham, Ph.D., M.D.	Study Director
NCT01075412	Sarah McGuire, Ph.D.	Principal Investigator
NCT01076543	Sonali Smith	Principal Investigator
NCT01078662	Bella Kaufman, MD	Principal Investigator
NCT01078662	Jane Robertson, BSc, MBCHB, MD	Study Director
NCT01080391	A. Keith Stewart, MD	Principal Investigator
NCT01080391	Antonio Palumbo, MD	Principal Investigator
NCT01080391	Philippe Moreau, MD	Principal Investigator
NCT01080391	S. Vincent Rajkumar, MD	Principal Investigator
NCT01081262	David Gershenson	Principal Investigator
NCT01081951	Amit Oza, MD	Principal Investigator
NCT01081951	Jane Robertson, BSc, MBCHB, MD	Study Director
NCT01082679	Randy Brown, MD, PhD	Principal Investigator
NCT01083316	Vaishali Sanchorawala, MD	Principal Investigator
NCT01084057	Yuan Yuan, MD, PhD	Principal Investigator
NCT01086332	Sudershan K. Bhatia, M.D., PhD	Study Director
NCT01086605	Alvaro Moreno-Asptia, MD	Study Chair
NCT01087554	Filip Janku, MD, PHD	Principal Investigator
NCT01088802	Arlene Forastiere, M.D.	Principal Investigator
NCT01088802	Quon Harry, M.D.	Principal Investigator
NCT01088815	Ana De Jesus-Acosta, MD	Principal Investigator
NCT01088815	Daniel Laheru, MD	Principal Investigator
NCT01089101	Jason Fangusaro	Principal Investigator
NCT01089361	Daniel Talmor, MD, MPH	Principal Investigator
NCT01089647	Ann Romaker, MD	Principal Investigator
NCT01090128	Hung Khong, MD	Principal Investigator
NCT01090414	Siddhartha Mitra, MD	Study Director
NCT01091454	Alvaro Moreno Aspitia, MD	Study Chair
NCT01091792	Camilo E Fadul, MD	Principal Investigator
NCT01093183	Jue Wang	Principal Investigator
NCT01093521	Christopher H Goss, MD, MSc	Principal Investigator
NCT01093573	Brenda Cooper, MD	Principal Investigator
NCT01095120	Jaffer Ajani, MD	Study Chair
NCT01095224	Xia Jin, MD, PhD	Study Chair
NCT01095822	Victor Serebruany, MD, PhD	Study Director
NCT01096992	William G. Wierda, MD, PhD, BS	Study Chair
NCT01097057	Leona Holmberg	Principal Investigator
NCT01097486	Roger Brown	Study Director
NCT01097642	Jenny Chang, MD	Principal Investigator
NCT01097694	Elliot Israel, M.D	Principal Investigator
NCT01097694	Joshua Boyce, M.D	Principal Investigator
NCT01097746	Anil Sood, MD	Principal Investigator
NCT01098266	Antonio Lambiase, MD	Study Director
NCT01100502	Naomi Hunder, MD	Study Director
NCT01100528	Pierre Triozzi	Principal Investigator
NCT01100775	L. E. Hong, M.D.	Principal Investigator
NCT01100944	Arun Rajan, M.D.	Principal Investigator
NCT01101581	William Wegener, MD, PhD	Study Chair
NCT01101880	Pamela Becker	Principal Investigator
NCT01102374	Adit A Ginde, MD, MPH	Principal Investigator
NCT01102426	Óscar F. Ballester, M.D.	Principal Investigator
NCT01102426	Rubén Niesvizky, M.D.	Principal Investigator
NCT01103635	Robert Vonderheide, MD, DPhil	Principal Investigator
NCT01103687	Lindsey Baden	Study Chair
NCT01104259	Jennifer Specht	Principal Investigator
NCT01105312	Winston Tan, MD, FACP	Study Chair
NCT01105546	Elena Santagostino, MD, PhD	Principal Investigator
NCT01106027	Mark Stegall, MD	Principal Investigator
NCT01106157	Michael J. Haller, MD	Principal Investigator
NCT01106833	Mary Horowitz, MD	Study Director
NCT01106872	Mohammed Milhem, MD	Principal Investigator
NCT01109004	Mary Horowitz, MD	Study Director
NCT01111058	Tanguy Seiwert, M.D.	Principal Investigator
NCT01111305	Amy D Klion, M.D.	Principal Investigator
NCT01111526	Lia Perez, MD	Principal Investigator
NCT01111994	Valerie Callender, MD	Principal Investigator
NCT01112306	Aline Frey	Study Director
NCT01112527	Tracy T. Batchelor, MD	Principal Investigator
NCT01113502	Noelle Frey, MD	Principal Investigator
NCT01113515	Vickie R Driver, DPM FACFAS	Principal Investigator
NCT01113970	Jonathan J. Lewis, MD, PhD	Study Director
NCT01114555	Shakeel Modak, MD	Principal Investigator
NCT01116648	Joyce Liu	Principal Investigator
NCT01118052	Ronald Alvarez	Principal Investigator
NCT01119664	Andrew Haas, MD, PhD	Principal Investigator
NCT01120236	Evan Yu	Principal Investigator
NCT01120249	Christopher W. Ryan, MD	Principal Investigator
NCT01120639	Scott Soltys	Principal Investigator
NCT01121120	Michael Schuster, MD	Principal Investigator
NCT01121224	Emmanouil S Brilakis, MD PhD	Study Chair
NCT01122199	Shadia I Jalal, MD	Study Chair
NCT01122901	David Peereboom	Principal Investigator
NCT01124539	James J Vredneburgh, MD	Principal Investigator
NCT01124734	Joseph J Drabick, MD	Principal Investigator
NCT01125046	Priya Kumthekar, MD	Principal Investigator
NCT01125293	Irene Ghobrial, MD	Principal Investigator
NCT01126736	Harish Dave	Study Director
NCT01127451	Harish Dave, MD	Study Director
NCT01128296	Herbert Zeh, MD	Principal Investigator
NCT01128582	Ronnie Fass, MD	Principal Investigator
NCT01129193	Craig Hofmeister	Principal Investigator
NCT01129453	Karen L Kotloff, M.D.	Principal Investigator
NCT01132014	Janos Tanyi, MD	Principal Investigator
NCT01132807	David J. Straus, MD	Principal Investigator
NCT01133275	Rami Komrokji, M.D.	Principal Investigator
NCT01133678	Everett Vokes, M.D.	Principal Investigator
NCT01134198	Wilfid N Raby, Md, PhD	Principal Investigator
NCT01134575	Hagop Kantarjian, MD	Study Chair
NCT01134614	Frank Hodi	Principal Investigator
NCT01136356	Eric Strain, M.D.	Principal Investigator
NCT01136772	Joseph P McEvoy, MD	Principal Investigator
NCT01136772	Scott Stroup, MD, MPH	Principal Investigator
NCT01136928	Adriana Andrade, MD, MPH	Principal Investigator
NCT01137695	Alan Schorr, DO	Principal Investigator
NCT01137695	Cheryl Rosenfeld, DO	Principal Investigator
NCT01137695	Jeffrey Rothman, MD	Principal Investigator
NCT01139294	Thomas J Abramo, MD	Principal Investigator
NCT01139970	Ivana Gojo	Principal Investigator
NCT01140178	Hassan Arshad, MD	Principal Investigator
NCT01140360	Kent Robertson, MD PhD	Principal Investigator
NCT01141309	Eric Sherman, MD	Principal Investigator
NCT01141491	William Tap, M.D.	Principal Investigator
NCT01142232	Attaya Suvannasankha, MD	Principal Investigator
NCT01142388	Steven Cohen	Principal Investigator
NCT01142401	Kerin Adelson	Principal Investigator
NCT01143402	Paul Chapman	Principal Investigator
NCT01143441	Bibiana Bielekova, M.D.	Principal Investigator
NCT01143779	Sarina Piha-Paul, MD	Principal Investigator
NCT01144338	Nardev Khurmi, MD	Study Director
NCT01145209	Inhye Ahn, M.D.	Principal Investigator
NCT01145430	Bhavana Pothuri	Principal Investigator
NCT01145495	Peter Martin	Principal Investigator
NCT01145508	Douglas McNeel	Principal Investigator
NCT01145807	Eduardo Tschen, MD	Principal Investigator
NCT01146054	Albert Koong	Principal Investigator
NCT01147107	Cecilia M Shikuma, M.D.	Principal Investigator
NCT01147107	Thuy Le, M.D.	Study Director
NCT01147107	Van Vinh Chau Nguyen, MD, PhD	Principal Investigator
NCT01147211	Chih-Hsin Yang, MD, Ph.D	Principal Investigator
NCT01148225	Andy Payne, PhD	Study Director
NCT01148849	Robert Lechleider, MD	Study Director
NCT01149083	Jeffrey Weitzel	Principal Investigator
NCT01149850	Phioanh Nghiemphu	Principal Investigator
NCT01150045	Jeffrey Meyerhardt, MD, MPH	Study Chair
NCT01151605	Paresh Dandona, MBBS	Principal Investigator
NCT01152541	Peter Hersh, MD	Principal Investigator
NCT01153243	Leon Fogelfeld, MD	Study Director
NCT01154387	Stuart Flechner, MD	Principal Investigator
NCT01154816	Yael Mosse	Principal Investigator
NCT01154920	Vali Papadimitrakopoulou, MD	Study Chair
NCT01155180	Christos S Mantzoros, MD	Principal Investigator
NCT01155284	Alex Rabinovitch, MD	Principal Investigator
NCT01155284	Diane L Hahn, LPN	Study Director
NCT01155583	Ehsan Malek, MD	Principal Investigator
NCT01155583	Frederic Reu	Principal Investigator
NCT01155817	David Miklos	Principal Investigator
NCT01155817	George Chen	Principal Investigator
NCT01156142	Robert C. Miller, MD	Study Chair
NCT01157091	Sumanta Pal	Principal Investigator
NCT01157416	Michael S Scheeringa, MD, MPH	Principal Investigator
NCT01157429	Michael S Scheeringa, MD, MPH	Principal Investigator
NCT01157975	Hesham Elkhayat, MD	Principal Investigator
NCT01157975	Mario Chojkier, MD	Principal Investigator
NCT01157975	Martina Buck, PhD	Principal Investigator
NCT01158105	Alan Miller, MD, PhD	Principal Investigator
NCT01158118	Mark Schroeder, M.D.	Principal Investigator
NCT01158222	Brian Rini	Principal Investigator
NCT01158417	Paresh Dandona, MD	Principal Investigator
NCT01158651	Bruce R. Korf, MD, PhD	Study Chair
NCT01158651	Mark Kieran, MD	Principal Investigator
NCT01159028	Jorge Cortes, MD	Study Chair
NCT01159028	Maro Ohanian, MD	Principal Investigator
NCT01159522	Muh-Hwan Su, Ph.D.	Study Director
NCT01159990	Esper Kallas, MD, PhD	Study Chair
NCT01160458	Raffit Hassan, M.D.	Principal Investigator
NCT01161524	Haichen Yang, M.D., M.A.	Study Director
NCT01162785	Colin P. Dinney, MD	Study Chair
NCT01163084	Christopher Logothetis	Principal Investigator
NCT01163786	Jayesh Mehta, MD	Principal Investigator
NCT01163786	Manu Jain, MD, MS	Principal Investigator
NCT01165112	Ajay Gopal	Principal Investigator
NCT01166139	Robert Spiera, MD	Principal Investigator
NCT01167114	Eunice Kwak, MD, PhD	Principal Investigator
NCT01167192	Rebecca Aft, M.D.	Principal Investigator
NCT01167712	John Chan	Principal Investigator
NCT01167725	Alexander Stojadinovic, MD	Principal Investigator
NCT01168219	Ravi Vij	Principal Investigator
NCT01168232	Carolyn McCourt	Principal Investigator
NCT01168921	William G. Wierda, MD, PHD, BS	Study Chair
NCT01169259	JoAnn E. Manson, MD, DrPH	Principal Investigator
NCT01169259	Julie E. Buring, ScD	Principal Investigator
NCT01169402	Kevin M Watt, MD	Principal Investigator
NCT01169636	Yasuhiro Oki, MD	Principal Investigator
NCT01171092	Sunil Abhyankar, MD	Principal Investigator
NCT01172938	Douglas Hough, MD	Study Director
NCT01173016	Paul Orchard, MD	Principal Investigator
NCT01173523	Leena Gandhi, MD, PhD	Principal Investigator
NCT01173692	Gary B. Gunn, MD	Principal Investigator
NCT01174082	Muzaffar H. Qazilbash, MD	Principal Investigator
NCT01174264	Manish Sharma	Principal Investigator
NCT01174940	Sunil Abhyankar, MD	Principal Investigator
NCT01175109	Deric M Park, MD	Principal Investigator
NCT01175148	Mehdi Hamadani, MD	Principal Investigator
NCT01175980	Patricia LoRusso	Principal Investigator
NCT01176461	Nikhil I. Khushalani, M.D.	Principal Investigator
NCT01176474	Nikhil Khushalani, M.D.	Principal Investigator
NCT01177397	Kristen Hege, M.D.	Study Director
NCT01177683	Sherif Farag, M.B., B.S.	Study Chair
NCT01178281	Robert P Gale, MD, Ph.D.	Study Director
NCT01178814	Mark Heaney, MD	Principal Investigator
NCT01180036	Fernando C. Fervenza, M.D., Ph.D.	Principal Investigator
NCT01180374	Mohini Ranganathan, M.D	Principal Investigator
NCT01180855	Richard R Bootzin, PhD	Principal Investigator
NCT01180959	Ahmed Kaseb, MBBS	Principal Investigator
NCT01181271	Yi-Bin A Chen, MD	Principal Investigator
NCT01182350	Mark W. Kieran, MD, PhD	Study Chair
NCT01182441	David R. Holmes, M.D.	Principal Investigator
NCT01182441	Vivek Y. Reddy, M.D.	Principal Investigator
NCT01183416	Brian Kushner, MD	Principal Investigator
NCT01183429	Brian Kushner, MD	Principal Investigator
NCT01183494	Manish Sharma, MD	Principal Investigator
NCT01183884	Brian Kushner, MD	Principal Investigator
NCT01183897	Brian Kushner, MD	Principal Investigator
NCT01184326	Joaquim Bellmunt, MD, PhD	Principal Investigator
NCT01185067	Scott L Hummel, MD, MS	Principal Investigator
NCT01185366	Amado Zurita, MD	Principal Investigator
NCT01186406	Annick Desjardins, MD, FRCPC	Principal Investigator
NCT01186562	Melena Bellin, MD	Principal Investigator
NCT01187199	Shannon Westin, MD	Principal Investigator
NCT01188421	Eric C. Strain, M.D.	Principal Investigator
NCT01188876	Marcela G. del Carmen, MD, MPH	Principal Investigator
NCT01189266	Jack Su	Principal Investigator
NCT01189370	Peter J Van Veldhuizen, MD	Principal Investigator
NCT01189383	Joseph Fay, MD	Principal Investigator
NCT01190098	Nancy Foldvary-Schaefer, DO	Principal Investigator
NCT01190449	Cara A. Rosenbaum, MD	Principal Investigator
NCT01191697	Peter Enzinger, MD	Principal Investigator
NCT01192555	Chrystal U. Louis, MD	Principal Investigator
NCT01192828	Johan VanHove, MD PhD MBA	Principal Investigator
NCT01193517	Michael Overman, MD	Principal Investigator
NCT01193842	Juan Ramos	Principal Investigator
NCT01194219	Irina Khanskaya, MD	Study Director
NCT01195415	Mark Zalupski	Principal Investigator
NCT01196390	Howard Safran	Principal Investigator
NCT01197170	Filip Janku, MD, PHD	Principal Investigator
NCT01197378	Craig Langman, MD	Principal Investigator
NCT01197560	Oliver Manzke, MD	Study Director
NCT01198028	Bonnie S. Glisson, MD, BS	Principal Investigator
NCT01198067	Sheeba K. Thomas, MD	Principal Investigator
NCT01198145	Robert C. Miller, MD	Study Chair
NCT01198158	George Philips	Principal Investigator
NCT01199146	Charles J Ryan, MD	Principal Investigator
NCT01199263	David Cohn	Principal Investigator
NCT01199575	Danelle F James, MD, MAS	Principal Investigator
NCT01199575	Thomas J Kipps, MD, PhD	Study Director
NCT01199614	John P Bilezikian, MD	Principal Investigator
NCT01200238	F. Stephen Hodi, MD	Principal Investigator
NCT01200329	Yago Nieto, MD, PHD	Principal Investigator
NCT01200355	Genovefa Papanicolaou, MD	Principal Investigator
NCT01202409	Michael Overman, MD	Principal Investigator
NCT01202994	Kevin Duff, Ph.D.	Principal Investigator
NCT01204918	Carlos Zarate, MD	Principal Investigator
NCT01204918	Gerard Sanacora, MD PhD	Principal Investigator
NCT01204918	Maurizio Fava, MD	Principal Investigator
NCT01204918	Sanjay Matthew, MD	Principal Investigator
NCT01206166	Daren K. Heyland, MD	Study Chair
NCT01207050	Anthony Lequerica, PhD	Principal Investigator
NCT01207323	Andrea Pirzkall, M.D.	Study Director
NCT01207492	Andrew J. Wagner, MD, PhD	Principal Investigator
NCT01207908	Meilan Rutter, MD	Principal Investigator
NCT01207921	Todd Fehniger, M.D., Ph.D.	Principal Investigator
NCT01208051	Jonas De Souza	Principal Investigator
NCT01208103	Michael Overman, MD	Principal Investigator
NCT01208389	Albert M Maguire, MD	Principal Investigator
NCT01209325	Joel Palefsky, MD	Principal Investigator
NCT01209442	Douglas Ney, M.D	Principal Investigator
NCT01209598	Mark Dickson, MD	Principal Investigator
NCT01210222	Kathleen Moore	Principal Investigator
NCT01210664	Jeffrey Bluestone, PhD	Study Director
NCT01210664	Kevan Herold, MD	Principal Investigator
NCT01210664	Stephen E Gitelman, MD	Study Chair
NCT01211262	Namir Hassan, PhD	Study Director
NCT01211405	Michael C Mithoefer, MD	Principal Investigator
NCT01211730	Mark E Molitch, M.D.	Principal Investigator
NCT01212757	Douglas Hough, M.D.	Study Director
NCT01212770	Douglas Hough, MD	Study Director
NCT01212822	Barbara Burtness	Principal Investigator
NCT01212900	David A Bluemke, M.D.	Principal Investigator
NCT01212952	Joseph R. Mikhael, M.D.	Principal Investigator
NCT01212952	Martha Lacy, M.D.	Study Chair
NCT01212952	Vivek Roy, M.D.	Principal Investigator
NCT01213082	Susanna S Park, MD PhD	Principal Investigator
NCT01213238	Apostolia M. Tsimberidou, MD, PHD	Principal Investigator
NCT01214083	Gihyun Yoon, MD	Principal Investigator
NCT01214187	Joe GN Garcia, MD	Principal Investigator
NCT01214187	Rosas O Ivan, MD	Principal Investigator
NCT01215136	Matthew Galsky, M.D.	Study Chair
NCT01215253	Wojciech Zareba, MD PhD	Principal Investigator
NCT01215344	Madan Jagasia, MD	Principal Investigator
NCT01216280	Longgui Wang, MD	Study Director
NCT01216982	Daniel T Johnston, MD, MPH	Principal Investigator
NCT01217060	Steven H. Lin, MD, PHD	Principal Investigator
NCT01217385	Bruce J. Tromberg, MD	Principal Investigator
NCT01217437	Adam Levy	Principal Investigator
NCT01217931	Amado Zurita, MD	Principal Investigator
NCT01218048	Rober L Ferris, MD, PhD	Principal Investigator
NCT01218555	Taofeek Owonikoko, PhD/MD	Principal Investigator
NCT01220154	David O'Malley, MD	Principal Investigator
NCT01220609	Linda Duska	Principal Investigator
NCT01220973	Susan Goodin, PhD, FCCP, BCOP	Principal Investigator
NCT01221181	Gerald B Appel, MD	Principal Investigator
NCT01221402	Emmanouil S Brilakis, MD, PhD	Principal Investigator
NCT01221792	Arifulla Khan, MD	Study Director
NCT01222260	Suzanne Lentzsch, MD, PhD	Principal Investigator
NCT01222689	Andrew Ko	Principal Investigator
NCT01222754	Katherine E Warren, M.D.	Principal Investigator
NCT01224067	Gustavo D Kinrys, MD	Principal Investigator
NCT01224730	Ed Cullen, PhD	Study Director
NCT01225055	Thomas J Schnizter, MD, PhD	Principal Investigator
NCT01225887	Don Dizon	Principal Investigator
NCT01227044	Lynn E Sullivan (Fiellin), MD	Principal Investigator
NCT01228175	Kent Hutchison, Ph.D	Principal Investigator
NCT01228318	Igho Ofotokun, MD, MSc	Principal Investigator
NCT01228318	Mervyn N Weitzmann, PhD	Principal Investigator
NCT01229150	Arun Rajan, M.D.	Principal Investigator
NCT01229566	Kevin C Maki, PhD	Principal Investigator
NCT01229761	Roger L Shapiro, MD, MPH	Principal Investigator
NCT01229761	Shahin Lockman, MD, MS	Principal Investigator
NCT01229943	Matthew Kulke	Principal Investigator
NCT01231412	Brenda Sandmaier	Principal Investigator
NCT01232283	Irina Khanskaya, MD	Study Director
NCT01232738	Yunxia Wang, MD	Principal Investigator
NCT01233687	Ahmad Tarhini, MD	Principal Investigator
NCT01233960	Priya Raina	Study Director
NCT01234467	Steven Park, MD	Principal Investigator
NCT01234766	Frederick Lansigan, MD	Principal Investigator
NCT01234935	Richard Finn	Principal Investigator
NCT01236560	Maryam Fouladi	Principal Investigator
NCT01237067	Jung-Min Lee, M.D.	Principal Investigator
NCT01237457	Ebrahim S Delpassand, M.D	Principal Investigator
NCT01237951	Yago Nieto, MD, PhD	Study Chair
NCT01238211	Guido Marcucci	Principal Investigator
NCT01238237	John Boockvar, MD	Principal Investigator
NCT01239342	Eric Jonasch	Principal Investigator
NCT01239394	Jeremy S. Abramson, MD	Principal Investigator
NCT01240304	Issam Makhoul, MD	Principal Investigator
NCT01240590	James Gulley, M.D.	Principal Investigator
NCT01241500	Steven M. Fruchtman, MD	Study Chair
NCT01241734	Tatyana Feldman, MD	Principal Investigator
NCT01242267	Scott D Rowley, MD	Principal Investigator
NCT01243190	William G. Weirda, MD, PhD, BS	Study Chair
NCT01243944	Mark Jones, MD	Study Director
NCT01243944	Srdan Verstovsek, MD,PhD	Study Director
NCT01245101	Rafael E Campo, MD	Principal Investigator
NCT01245673	Aaron Rapoport, M.D.	Study Chair
NCT01245673	Ed Stadtmauer, MD	Principal Investigator
NCT01246622	Elizabeth Griffiths, MD	Principal Investigator
NCT01247246	Israel Rios, MD	Study Director
NCT01248273	Paul Sabbatini, MD	Principal Investigator
NCT01248962	Roisin O'Cearbhaill, MD BCh	Principal Investigator
NCT01249430	Rebecca Klisovic	Principal Investigator
NCT01249443	Missak Haigentz	Principal Investigator
NCT01250925	Christine Sindt, OD	Principal Investigator
NCT01250925	Pedram Hamrah, MD	Principal Investigator
NCT01251861	Anna Ferrari	Principal Investigator
NCT01251874	Bhuvaneswari Ramaswamy	Principal Investigator
NCT01252953	Louise Bowman	Principal Investigator
NCT01252953	Martin Landray	Principal Investigator
NCT01253070	Geoffrey Uy	Principal Investigator
NCT01253161	Jonathan Strosberg, M.D.	Principal Investigator
NCT01253460	William G. Wierda, MD, PHD, BS	Principal Investigator
NCT01253473	Barry J Make, MD	Principal Investigator
NCT01253473	Edwin K Silverman, MD, PhD	Principal Investigator
NCT01253473	James D Crapo, MD	Principal Investigator
NCT01253642	Tomasz Beer	Principal Investigator
NCT01254578	Leslie Andritsos	Principal Investigator
NCT01254617	Erin Bertino	Principal Investigator
NCT01254864	Christopher Logothetis, MD	Principal Investigator
NCT01256268	Robert Wenham, M.D.	Principal Investigator
NCT01256398	Matthew Wieduwilt	Principal Investigator
NCT01257737	Colleen Canavan, BS	Study Chair
NCT01258855	Ahmad Tarhini	Principal Investigator
NCT01258933	William G Wierda, MD	Principal Investigator
NCT01259063	Guido Dalbagni, MD	Principal Investigator
NCT01259089	Melissa Johnson	Principal Investigator
NCT01260688	Sebastien Hotte	Principal Investigator
NCT01261247	Patrick Johnston, M.D.	Study Chair
NCT01261299	Chong-xian Pan, MD, PhD	Study Chair
NCT01262300	Adit A Ginde, MD, MPH	Principal Investigator
NCT01263145	Funda Meric-Bernstam	Principal Investigator
NCT01263769	Christopher Wood, MD	Principal Investigator
NCT01263782	John Heymach, MD, PHD	Principal Investigator
NCT01263938	Ronald G Collman, MD	Principal Investigator
NCT01263951	Marcia Brose, MD, PhD	Principal Investigator
NCT01264432	Nilofer Azad	Principal Investigator
NCT01264705	Adam C Yopp, MD	Principal Investigator
NCT01265433	Marjorie Zauderer, MD	Principal Investigator
NCT01265550	Stuart J Spechler, MD	Study Chair
NCT01265563	Paolo Fanti, MD	Principal Investigator
NCT01266031	Mark R Gilbert, M.D.	Principal Investigator
NCT01266083	Peter Maslak, MD	Principal Investigator
NCT01266317	Michael Donahoe, MD	Principal Investigator
NCT01266603	Wen-Jen Hwu, MD,PHD	Principal Investigator
NCT01267240	Eric Chen	Principal Investigator
NCT01267955	Antoine Italiano	Principal Investigator
NCT01268553	Ronald J Oudiz, MD	Principal Investigator
NCT01269346	Sam Misir	Study Director
NCT01269385	Steven Ansell, M.D.	Study Chair
NCT01270321	Taofeek Owonikoko, MD, PhD	Principal Investigator
NCT01271374	Bobby V Khan, MD, PhD	Principal Investigator
NCT01271374	Keith C Ferdinand, MD	Study Director
NCT01271504	Melissa J Versola, RN	Study Director
NCT01272245	Hagop Kantarjian, MD	Principal Investigator
NCT01272830	Mark W Kovacik, BS	Study Director
NCT01272830	Thomas F Bear, MD	Principal Investigator
NCT01273337	James M Hinson, MD	Study Director
NCT01273610	Arti Hurria, MD	Principal Investigator
NCT01273662	Ann-Lii Cheng, MD, PhD	Principal Investigator
NCT01273805	Brian Wolpin, MD, MPH	Principal Investigator
NCT01274338	Ahmad Tarhini	Principal Investigator
NCT01274429	Wesley Burks, MD	Principal Investigator
NCT01275586	Melissa Markel, MD	Study Chair
NCT01275677	Louis Fehrenbacher	Principal Investigator
NCT01276041	Chau Dang, MD	Principal Investigator
[truncated: 2,113 more rows]

## Sheet: 1_Active_NonPerson
NCT ID	Last name	Role
NCT00099437	Faslodex Medical Science Director, MD	Study Director
NCT00141921	MD	Study Director
NCT00150800	UCB Cares	Study Director
NCT00175916	UCB Cares	Study Director
NCT00251433	Novartis Pharmaceuticals	Study Director
NCT00263588	Novartis Pharmaceuticals	Study Director
NCT00272987	Novartis Pharmaceuticals	Study Director
NCT00274469	AstraZeneca Faslodex Medical Science Director, MD	Study Director
NCT00278915	AstraZeneca Faslodex Medical Science Director, MD	Study Director
NCT00281658	Novartis Pharmaceuticals	Study Director
NCT00300781	Puma	Study Director
NCT00306202	Bristol-Myers Squibb	Study Director
NCT00309179	Eisai Medical Services	Study Director
NCT00310388	GSK Clinical Trials	Study Director
NCT00322218	Biogen Idec, MD	Study Director
NCT00338182	Emerging Oncology Medical Science Director, MD	Study Director
NCT00338286	Janssen Research &amp; Development, LLC C. Clinical Trial	Study Director
NCT00364351	Clinical Sciences &amp; Operations	Study Director
NCT00367471	Novartis Pharmaceuticals	Study Director
NCT00375674	Pfizer CT.gov Call Center	Study Director
NCT00378482	AstraZeneca AstraZeneca	Study Director
NCT00387205	Novartis Pharmaceuticals	Study Director
NCT00398567	Puma	Study Director
NCT00401843	Janssen Research &amp; Development, LLC Clinical Trial	Study Director
NCT00410761	Clinical Sciences &amp; Operations	Study Director
NCT00418886	Clinical Sciences &amp; Operations	Study Director
NCT00423891	Bristol-Myers Squibb	Study Director
NCT00444535	Novartis Pharmaceuticals	Study Director
NCT00445458	Puma	Study Director
NCT00446446	MD	Study Director
NCT00451555	Call 1-877-CTLILLY (1-877-285-4559) or 1-317-615-4559 Mon - Fri 9 AM - 5 PM Eastern time (UTC/GMT - 5 hours, EST)	Study Director
NCT00452413	Call 1-877-CTLILLY (1-877-285-4559) or 1-317-615-4559 Mon - Fri 9 AM - 5PM Eastern time (UTC/GMT- 5 hours,EST)	Study Director
NCT00463814	Emerging Oncology Medical Science Director, MD	Study Director
NCT00471497	Novartis Pharmaceuticals	Study Director
NCT00476996	Clinical Trials	Study Director
NCT00479817	MD	Study Director
NCT00486889	Medical Monitor	Study Director
NCT00490139	Novartis Pharmaceuticals	Study Director
NCT00496769	Bristol-Myers Squibb	Study Director
NCT00501059	Bayer Study Director	Study Director
NCT00510718	Medical Director	Study Director
NCT00520104	Javelin Pharmaceuticals	Study Director
NCT00532675	Novartis Pharmaceuticals	Study Director
NCT00543439	Pfizer CT.gov Call Center	Study Director
NCT00553358	Novartis Pharmaceuticals	Study Director
NCT00574288	Janssen Research &amp; Development, LLC Clinical Trial	Study Director
NCT00626197	Clinical Trials	Study Director
NCT00636168	Bristol-Myers Squibb	Study Director
NCT00664326	Bayer Study Director	Study Director
NCT00667251	Novartis pharmaceuticals	Study Director
NCT00676715	Clinical Trials	Study Director
NCT00680901	Novartis Pharmaceuticals	Study Director
NCT00680992	MD	Study Director
NCT00685776	Medical Monitor	Study Director
NCT00697346	Medical Monitor	Study Director
NCT00703326	Call 1-877-CTLILLY (1-877-285-4559) or 1-317-615-4559 Mon - Fri 9 AM - 5 PM Eastern time (UTC/GMT - 5 hours, EST)	Study Director
NCT00706030	Puma	Study Director
NCT00709761	Novartis Pharmaceuticals	Study Director
NCT00712933	GSK Clinical Trials	Study Director
NCT00720941	Novartis Pharmaceuticals	Study Director
NCT00721409	Pfizer CT.gov Call Center	Study Director
NCT00722137	Medical Monitor	Study Director
NCT00726388	Javelin Pharmaceuticals	Study Director
NCT00730639	Bristol-Myers Squibb	Study Director
NCT00741260	Puma	Study Director
NCT00748189	Novartis Pharmaceuticals	Study Director
NCT00756509	Novartis Pharmaceuticals	Study Director
NCT00761774	UCB Cares	Study Director
NCT00767819	Novartis Pharmaceuticals	Study Director
NCT00777036	Bristol-Myers Squibb	Study Director
NCT00777101	Puma	Study Director
NCT00782067	Novartis Pharmaceuticals	Study Director
NCT00789373	Call 1-877-CTLILLY (1-877-285-4559) or 1-317-615-4559 Mon - Fri 9 AM - 5 PM Eastern time (UTC/GMT - 5 hours, EST)	Study Director
NCT00790816	Novartis Pharmaceuticals	Study Director
NCT00790933	Medical Monitor	Study Director
NCT00791700	Pfizer CT.gov Call Center	Study Director
NCT00794781	Eisai Medical Services	Study Director
NCT00805194	Boehringer Ingelheim	Study Chair
NCT00820222	Novartis Pharmaceuticals	Study Director
NCT00824265	Novartis Pharmaceuticals	Study Director
NCT00825955	Bristol-Myers Squibb	Study Director
NCT00829166	Clinical Trials	Study Director
NCT00835770	Medical Director	Study Director
NCT00853372	MD	Study Director
NCT00858377	MD	Study Director
NCT00862979	Novartis Pharmaceuticals	Study Director
NCT00863681	Bayer Study Director	Study Director
NCT00866697	Novartis Pharmaceuticals	Study Director
NCT00867113	Novartis Pharmaceuticals	Study Director
NCT00876395	Novartis Pharmaceuticals	Study Director
NCT00877006	Sponsor's Medical Expert	Study Director
NCT00878709	Puma	Study Director
NCT00887198	Janssen Research &amp; Development, LLC Clinical Trial	Study Director
NCT00901901	Bayer Study Director	Study Director
NCT00908752	Bristol-Myers Squibb	Study Director
NCT00910247	CNS Medical Director	Study Director
NCT00910429	Bayer Study Director	Study Director
NCT00915018	Puma	Study Director
NCT00918203	Call 1-877-CTLILLY (1-877-285-4559) or 1-317-615-4559 Mon - Fri 9 AM - 5 PM Eastern time (UTC/GMT - 5 hours, EST)	Study Director
NCT00920816	Pfizer CT.gov Call Center	Study Director
NCT00940602	Novartis Pharmaceuticals	Study Director
NCT00943722	Medical Director	Study Director
NCT00946647	Novartis Pharmaceuticals	Study Director
NCT00948675	Call 1-877-CTLILLY (1-877-285-4559) or 1-317-615-4559 Mon - Fri 9 AM - 5 PM Eastern time (UTC/GMT - 5 hours, EST)	Study Director
NCT00949650	Boehringer Ingelheim	Study Chair
NCT00949702	Clinical Trials	Study Director
NCT00951015	GSK Clinical Trials	Study Director
NCT00962611	Bayer Study Director	Study Director
NCT00968968	Novartis Pharmaceuticals	Study Director
NCT00980538	Janssen R&amp;D Ireland Clinical Trial	Study Director
NCT00981058	Call 1-877-CTLILLY (1-877-285-4559) or 1-317-615-4559 Mon - Fri 9 AM - 5 PM Eastern time (UTC/GMT - 5 hours, EST)	Study Director
NCT00982111	Call 1-877-CTLILLY (1-877-285-4559) or 1-317-615-4559 Mon - Fri 9 AM - 5 PM Eastern time (UTC/GMT - 5 hours, EST)	Study Director
NCT00984282	Bayer Study Director	Study Director
NCT01001377	MD	Study Director
NCT01010061	Clinical Trials	Study Director
NCT01015118	Boehringer Ingelheim	Study Chair
NCT01024036	Janssen Research &amp; Development, LLC Clinical Trial	Study Director
NCT01024231	Bristol-Myers Squibb	Study Director
NCT01024998	Medical Monitor	Study Director
NCT01031069	GSK Clinical Trials	Study Director
NCT01032629	Janssen Research &amp; Development, LLC Clinical Trial	Study Director
NCT01039376	Novartis Pharmaceuticals	Study Director
NCT01058707	Medical Monitor	Study Director
NCT01059630	Clinical Trials	Study Director
NCT01065454	Bayer Study Director	Study Director
NCT01071954	MD	Study Director
NCT01072175	GSK Clinical Trials	Study Director
NCT01077154	MD	Study Director
NCT01079806	Bristol-Myers Squibb	Study Director
NCT01084863	Investigational Site	Principal Investigator
NCT01084876	Investigational Site	Principal Investigator
NCT01091428	Medical Monitor	Study Director
NCT01094288	Medical Monitor	Study Director
NCT01099358	Call 1-877-CTLILLY (1-877-285-4559) or 1-317-615-4559 Mon - Fri 9AM - 5 PM Eastern time (UTC/GMT - 5 hours, EST)	Study Director
NCT01099579	Bristol-Myers Squibb	Study Director
NCT01101035	Medical Director	Study Director
NCT01104155	Eisai US Medical Services	Study Director
NCT01107457	Call 1-877-CTLILLY (1-877-285-4559) or 1-317-615-4559 Mon - Fri 9 AM - 5 PM Eastern time (UTC/GMT - 5 hours, EST)	Study Director
NCT01120184	Clinical Trials	Study Director
NCT01121588	Pfizer CT.gov Call Center	Study Director
NCT01125566	Boehringer Ingelheim	Study Chair
NCT01127633	Call 1-877-CTLILLY (1-877-285-4559) or 1-317-615-4559 Mon - Fri 9 AM - 5 PM Eastern time (UTC/GMT - 5 hours, EST)	Study Director
NCT01132612	Novartis Pharmaceuticals	Study Director
NCT01134120	Call 1-877-CTLILLY (1-877-285-4559) or 1-317-615-4559 Mon - Fri 9 AM - 5 PM Eastern time (UTC/GMT - 5 hours, EST)	Study Director
NCT01136733	Eisai Medical Services	Study Director
NCT01137682	Novartis Pharmaceuticals	Study Director
NCT01138605	Janssen R&amp;D Ireland Clinical Trial	Study Director
NCT01146652	Clinical Sciences and Operations	Study Director
NCT01147822	Novartis Pharmaceuticals	Study Director
NCT01153763	GSK Clinical Trials	Study Director
NCT01154140	Pfizer CT.gov Call Center	Study Director
NCT01156870	Clinical Sciences &amp; Operations	Study Director
NCT01157364	Medical Director	Study Director
NCT01160211	Novartis Pharmaceuticals	Study Director
NCT01160744	Call 1-877-CTLILLY (1-877-285-4559) or 1-317-615-4559 Mon - Fri 9 AM - 5 PM Eastern time (UTC/GMT - 5 hours, EST)	Study Director
NCT01168973	Call 1-877-CTLILLY (1-877-285-4559) or 1-317-615-4559 Mon - Fri 9AM - 5PM Eastern time (UTC/GMT - 5 hours, EST)	Study Director
NCT01170663	Call 1-877-CTLILLY (1-877-285-4559) or 1-317-615-4559 Mon - Fri 9 AM - 5 PM Eastern time (UTC/GMT - 5 hours, EST)	Study Director
NCT01171898	Aragon Pharmaceuticals, Inc Clinical Trial	Study Director
NCT01183780	Call 1-877-CTLILLY (1-877-285-4559) or 1-317-615-4559 Mon - Fri 9 AM - 5 PM Eastern time (UTC/GMT - 5 hours, EST)	Study Director
NCT01185964	Call 1-877-CTLILLY (1-877-285-4559) or 1-317-615-4559 Mon - Fri 9 AM - 5 PM Eastern time (UTC/GMT - 5 hours, EST)	Study Director
NCT01188252	Bayer Study Director	Study Director
NCT01190410	UCB Clinical Trial Call Center	Study Director
NCT01191801	Sunesis Medical Monitor, MD	Study Director
NCT01194570	Clinical Trials	Study Director
NCT01201356	Novartis Pharmaceuticals	Study Director
NCT01204749	MD	Study Director
NCT01204775	Bristol-Myers Squibb	Study Director
NCT01210495	Pfizer CT.gov Call Center	Study Director
NCT01213472	GSK Clinical Trials	Study Director
NCT01217957	Medical Monitor	Study Director
NCT01219699	Novartis Pharmaceuticals	Study Director
NCT01220271	Call 1-877-CTLILLY (1-877-285-4559) or 1-317-615-4559 Mon - Fri 9 AM - 5 PM Eastern time (UTC/GMT - 5 hours, EST)	Study Director
NCT01224106	Clinical Trials	Study Director
NCT01226485	Call 1-858-255-5959 Mon - Fri 9 AM - 5 PM Pacific Time (PST)	Study Director
NCT01226628	Janssen Research &amp; Development, LLC Clinical Trial	Study Director
NCT01227824	GSK Clinical Trials	Study Director
NCT01227889	GSK Clinical Trials	Study Director
NCT01231516	GSK Clinical Trials	Study Director
NCT01231659	Novartis Pharmaceuticals	Study Director
NCT01234337	Bayer Study Director	Study Director
NCT01234402	Call 1-877-CTLILLY (1-877-285-4559) or 1-317-615-4559 Mon - Fri 9 AM - 5 PM Eastern time (UTC/GMT - 5 hours, EST)	Study Director
NCT01235962	Novartis Pharmaceuticals	Study Director
NCT01237236	Novartis Pharmaceuticals	Study Director
NCT01239797	Bristol-Myers Squibb	Study Director
NCT01243424	Boehringer Ingelheim	Study Chair
NCT01245062	GSK Clinical Trials	Study Director
NCT01247324	Clinical Trials	Study Director
NCT01253707	MD	Study Director
NCT01258608	GSK Clinical Trials	Study Director
NCT01266902	Janssen R&amp;D Ireland Clinical Trial	Study Director
NCT01271712	Bayer Study Director	Study Director
NCT01271803	Clinical Trials	Study Director
NCT01274351	Novartis Pharmaceuticals	Study Director
NCT01281254	MD	Study Director
NCT01281423	Clinical Trials	Study Director
NCT01285609	Bristol-Myers Squibb	Study Director
NCT01286987	Medical Director	Study Director
NCT01287546	Call 1-877-CTLILLY (1-877-285-4559) or 1-317-615-4559 Mon - Fri 9 AM - 5 PM Eastern time (UTC/GMT - 5 hours, EST)	Study Director
NCT01287598	Bayer Study Director	Study Director
NCT01287741	Clinical Trials	Study Director
NCT01288911	Associate Medical Science Director	Study Director
NCT01288911	Principal Investigator	Principal Investigator
NCT01292655	Bristol-Myers Squibb	Study Director
NCT01294579	Novartis Pharmaceuticals	Study Director
NCT01295827	Medical Director	Study Director
NCT01296932	Boehringer Ingelheim	Study Chair
NCT01300026	MD	Study Director
NCT01308567	Clinical Sciences &amp; Operations	Study Director
NCT01314118	Janssen Services, LLC. Clinical Trial	Study Director
NCT01318902	Medical Monitor	Study Director
NCT01320085	Array BioPharma	Study Director
NCT01321554	Eisa Inc	Study Director
NCT01324479	Novartis Pharmaceuticals	Study Director
NCT01327053	Novartis Pharmaceuticals	Study Director
NCT01327612	MD	Study Director
NCT01331239	Novartis Pharmaceuticals	Study Director
NCT01332968	Clinical Trials	Study Director
NCT01335399	Bristol-Myers Squibb	Study Director
NCT01335685	Medical Monitor	Study Director
NCT01335698	Bristol-Myers Squibb	Study Director
NCT01336634	GSK Clinical Trials	Study Director
NCT01339559	UCB Cares	Study Director
NCT01345019	MD	Study Director
NCT01345253	GSK Clinical Trials	Study Director
NCT01345682	Boehringer Ingelheim	Study Chair
NCT01354431	Bristol-Myers Squibb	Study Director
NCT01356927	Principal Investigator	Principal Investigator
NCT01358175	Novartis Pharmaceuticals	Study Director
NCT01358721	Bristol-Myers Squibb	Study Director
NCT01358877	Clinical Trials	Study Director
NCT01363232	Array BioPharma	Study Director
NCT01363297	Pfizer CT.gov Call Center	Study Director
NCT01363817	Bristol-Myers Squibb	Study Director
NCT01369355	Janssen Research &amp; Development, LLC Clinical Trial	Study Director
NCT01373164	Call 1-877-CTLILLY (1-877-285-4559) or 1-317-615-4559 Mon - Fri 9 AM - 5 PM Eastern time (UTC/GMT - 5 hours, EST)	Study Director
NCT01373281	Medical Director	Study Director
NCT01374516	Medical Director	Study Director
NCT01374906	Novartis Pharmaceuticals	Study Director
NCT01376167	GSK Clinical Trials	Study Director
NCT01381874	Janssen Research &amp; Development, LLC Clinical Trial	Study Director
NCT01384734	Bristol-Myers Squibb	Study Director
NCT01386658	Study Physician	Study Director
NCT01389596	Pfizer CT.gov Call Center	Study Director
NCT01391130	Call 1-877-CTLILLY (1-877-285-4559) or 1-317-615-4559 Mon - Fri 9 AM - 5 PM Eastern time (UTC/GMT - 5 hours, EST)	Study Director
NCT01392443	Novartis Pharmaceuticals	Study Director
NCT01394016	Call 1-877-CTLILLY (1-877-285-4559) or 1-317-615-4559 Mon - Fri 9 AM - 5 PM Eastern time (UTC/GMT - 5 hours, EST)	Study Director
NCT01394952	Call 1-877-CTLILLY (1-877-285-4559 or 1-317-615-4559 Mon - Fri 9 AM - 5PM Eastern time (UTC/GMT - 5 hours, EST)	Study Director
NCT01397825	Medical Monitor	Study Director
NCT01400503	Janssen Research &amp; Development, LLC Clinical Trial	Study Director
NCT01400555	Cougar Biotechnology, Inc. Clinical Trial	Study Director
NCT01404325	Novartis Pharmceuticals	Study Director
NCT01412333	Clinical Trials	Study Director
NCT01412957	MD	Study Director
NCT01414855	Clinical Trials	Study Director
NCT01425723	Medical Director	Study Director
NCT01430416	Novartis Pharmaceuticals	Study Director
NCT01433445	Novartis Pharmaceuticals	Study Director
NCT01434186	Bristol-Myers Squibb	Study Director
NCT01435772	Medical Monitor	Study Director
NCT01436656	Array BioPharma	Study Director
NCT01439152	Bayer Study Director	Study Director
NCT01439165	Medical Director	Study Director
NCT01439568	Call 1-877-CTLILLY (1-877-285-4559) or 1-317-615-4559 Mon - Fri 9AM - 5 PM Eastern time (UTC/GMT - 5 hours, EST)	Study Director
NCT01439880	MD	Study Director
NCT01441973	Bristol-Myers Squibb	Study Director
NCT01446159	MedImmune LLC	Study Director
NCT01449058	Array BioPharma	Study Director
NCT01449370	Medical Monitor	Study Director
NCT01449929	GSK Clinical Trials	Study Director
NCT01450761	Bristol-Myers Squibb	Study Director
NCT01454076	Medical Monitor	Study Director
NCT01454102	Bristol-Myers Squibb	Study Director
NCT01456689	Novartis Pharmaceuticals	Study Director
NCT01460160	Bristol-Myers Squibb	Study Director
NCT01461317	Clinical Trials	Study Director
NCT01465997	UCB Cares	Study Director
NCT01467427	Global Clinical Registry (GCR, 1452)	Study Director
NCT01468688	Novartis Pharmaceuticals	Study Director
NCT01469130	Array BioPharma	Study Director
NCT01472081	Bristol-Myers Squibb	Study Director
NCT01472887	Clinical Sciences &amp; Operations	Study Director
NCT01473901	Novartis Pharmaceuticals	Study Director
NCT01474512	Call 1-877-CTLILLY (1-877-285-4559) or 1-317-615-4559 Mon - Fri 9 AM - 5 PM Eastern time (UTC/GMT - 5 hours, EST)	Study Director
NCT01478048	Bristol-Myers Squibb	Study Director
NCT01480180	Global Clinical Registry (GCR, 1452)	Study Director
NCT01482962	Medical Monitor	Study Director
NCT01484275	Janssen Research &amp; Development, LLC Clinical Trial	Study Director
NCT01485861	Clinical Trials	Study Director
NCT01492088	Medical Monitor	Study Director
NCT01493505	MD	Study Director
NCT01493778	Global Clinical Registry (GCR, 1452)	Study Director
NCT01494688	Clinical Trials	Study Director
NCT01496131	Medical Responsible	Study Director
NCT01514123	Clinical Research	Study Director
NCT01515189	Bristol-Myers Squibb	Study Director
NCT01515306	Call 1-877-CTLILLY (1-877-285-4559) or 1-317-615-4559 Mon - Fri 9 AM - 5 PM Eastern time (UTC/GMT - 5 hours, EST)	Study Director
NCT01517802	Janssen Research &amp; Development, LLC Clinical Trial	Study Director
NCT01519960	Clinical Trials	Study Director
NCT01520220	Call 1-877-CTLILLY (1-877-285-4559) or 1-317-615-4559 Mon-Fri 9 AM - 5 PM Eastern time (UTC/GMT - 5 hours, EST)	Study Director
NCT01523587	Boehringer Ingelheim	Study Chair
NCT01524783	Novartis Pharmaceuticals	Study Director
NCT01524978	Clinical Trials	Study Director
NCT01525550	Pfizer CT.gov Call Center	Study Director
NCT01534052	Clinical Study Manager	Study Chair
NCT01543698	Array BioPharma Clinical Trial Call Center	Study Director
NCT01544491	Novartis Pharmaceuticals	Study Director
NCT01544595	Novartis Pharmaceuticals	Study Director
NCT01550003	UCB Cares	Study Director
NCT01555125	Novartis Pharmaceuticals	Study Director
NCT01564251	Clinical Trials	Study Director
NCT01564537	Medical Monitor	Study Director
NCT01564784	Pfizer CT.gov Call Center	Study Director
NCT01565928	Medical Director	Study Director
NCT01568892	GSK Clinical Trials	Study Director
NCT01571284	Clinical Sciences &amp; Operations	Study Director
NCT01575834	MD	Study Director
NCT01575873	MD	Study Director
NCT01576484	Clinical Trial Management	Study Director
NCT01578499	Medical Monitor	Study Director
NCT01580293	Bayer Study Director	Study Director
NCT01582061	Novartis Pharmaceuticals	Study Director
NCT01582269	Call 1-877-CTLILLY (1-877-285-4559) or 1-317-615-4559 Mon - Fri 9 AM - 5 PM Eastern time (UTC/GMT - 5 hours, EST)	Study Director
NCT01584648	GSK Clinical Trials	Study Director
NCT01587040	Clinical Sciences &amp; Operations	Study Director
NCT01594723	Call 1-877-CTLilly (1-877-285-4559) or 1-317-615-4559 Mon- Fri 9 AM - 5 PM Eastern time (UTC/GMT -5 hours, EST)	Study Director
NCT01597193	Medical Director	Study Director
NCT01597245	Call 1-877-CTLILLY (1-877-285-4559) or 1-317-615-4559 Mon - Fri 9 AM - 5 PM Eastern time (UTC/GMT - 5 hours, EST)	Study Director
NCT01597908	GSK Clinical Trials	Study Director
NCT01602120	Clinical Trials	Study Director
NCT01602406	Novartis Pharmaceuticals	Study Director
NCT01604343	Janssen Research &amp; Development, LLC Clinical Trial	Study Director
NCT01604824	Clinical Trial Management	Study Director
NCT01610284	Novartis Pharmaceuticals	Study Director
NCT01610414	GSK Clinical Trials	Study Director
NCT01611090	Janssen Research &amp; Development, LLC Clinical Trial	Study Director
NCT01611558	Bristol-Myers Squibb	Study Director
NCT01615029	Janssen Research &amp; Development, LLC Clinical Trial	Study Director
NCT01619085	Boehringer Ingelheim	Study Chair
NCT01621178	Call 1-877-CTLILLY (1-877-285-4559) or 1-317-615-4559 Mon - Fri 9 AM - 5 PM Eastern time (UTC/GMT - 5 hours, EST)	Study Director
NCT01621490	Bristol-Myers Squibb	Study Director
NCT01621542	Vice President Clinical Development and Medical Affairs, MD	Study Director
NCT01624142	MD	Study Director
NCT01625182	Novartis Pharmaceuticals	Study Director
NCT01631214	MD	Study Director
NCT01633060	Novartis Pharmaceuticals	Study Director
NCT01634555	Call 1-877-CTLILLY (1-877-285-4559) or 1-317-615-4559 Mon - Fri 9 AM - 5 PM Eastern time (UTC/GMT - 5 hours, EST)	Study Director
NCT01636687	Novartis Pharmaceuticals	Study Director
NCT01639001	Pfizer CT.gov Call Center	Study Director
NCT01640951	Novartis Pharmaceuticals	Study Director
NCT01641809	GSK Clinical Trials	Study Director
NCT01642004	Bristol-Myers Squibb	Study Director
NCT01646021	Janssen Research &amp; Development, LLC Clinical Trial	Study Director
NCT01646177	Call 1-877-CTLILLY (1-877-285-4559) or 1-317-615-4559 Mon - Fri 9 AM - 5 PM Eastern time (UTC/GMT - 5 hours, EST)	Study Director
NCT01647971	TG Therapeutics Clinical Trials	Study Director
NCT01649375	Novartis Pharmaceuticals	Study Director
NCT01650194	Associate Medical Director	Study Director
NCT01652872	MD	Study Director
NCT01653470	Bristol-Myers Squibb	Study Director
NCT01660451	Bayer Study Director	Study Director
NCT01663623	GSK Clinical Trials	Study Director
NCT01663727	Clinical Trials	Study Director
NCT01663857	Call 1-877-CTLILLY (1-877-285-4559) or 1-317-615-4559 Mon-Fri 9am-5pm Eastern time *UTC/GMT-5 hours, EST)	Study Director
NCT01664923	Medical Director	Study Director
NCT01665144	Novartis Pharmaceuticals	Study Director
NCT01667419	Clinical Trials	Study Director
NCT01668784	Bristol-Myers Squibb	Study Director
NCT01672775	Medical Director	Study Director
NCT01673867	Bristol-Myers Squibb	Study Director
NCT01677572	Medical Director	Study Director
NCT01677780	Clinical Trials	Study Director
NCT01682083	GSK Clinical Trials	Study Director
NCT01682187	Call 1-877-CTLILLY (1-877-285-4559) or 1-317-615-4559 Mon - Fri 9 AM - 5 PM Eastern time (UTC/GMT - 5 hours, EST)	Study Director
NCT01682512	Boehringer Ingelheim	Study Chair
NCT01684215	Pfizer CT.gov Call Center	Study Director
NCT01685138	Novartis Pharmaceuticals	Study Director
NCT01685892	Clinical Trials	Study Director
NCT01689519	Clinical Trials	Study Director
NCT01691859	GSK Clinical Trials	Study Director
NCT01693614	Novartis Pharmaceuticals	Study Director
NCT01694485	MD	Study Director
NCT01695135	Janssen Research &amp; Development, LLC Clinical Trial	Study Director
NCT01695239	Call 1-877-CTLILLY (1-877-285-4559) or 1-317-615-4559 Mon - Fri 9 AM - 5 PM Eastern time (UTC/GMT - 5 hours, EST)	Study Director
NCT01696396	MD	Study Director
NCT01697579	Medical Director	Study Director
NCT01698905	Novartis Pharmaceuticals	Study Director
NCT01698918	Novartis Pharmaceuticals	Study Director
NCT01703481	Janssen Research &amp; Development, LLC Clinical Trial	Study Director
NCT01707992	Teva Medical Expert, MD	Study Director
NCT01708161	Novartis Pharmaceuticals	Study Director
NCT01708174	Novartis Pharmaceuticals	Study Director
NCT01709513	Clinical Trial Management	Study Director
NCT01712490	Medical Monitor	Study Director
NCT01713946	Novartis Pharmaceuticals	Study Director
NCT01714817	Bristol-Myers Squibb	Study Director
NCT01719380	Array BioPharma	Study Director
NCT01721746	Bristol-Myers Squibb	Study Director
NCT01721759	Bristol-Myers Squibb	Study Director
NCT01721876	Boehringer Ingelheim	Study Chair
NCT01722331	Medical Director	Study Director
NCT01723020	MD	Study Director
NCT01723826	Clinical Trials	Study Director
NCT01728311	Bayer Study Director	Study Director
NCT01729754	Medical Director	Study Director
NCT01731600	Global Clinical Registry (GCR, 1452)	Study Director
NCT01731951	Janssen Research &amp; Development, LLC Clinical Trial	Study Director
NCT01735955	Novartis Pharmaceuticals	Study Director
NCT01735968	Novartis Pharmaceuticals	Study Director
NCT01739348	Medical Director	Study Director
NCT01740297	MD	Study Director
NCT01740336	Clinical Trials	Study Director
NCT01740427	Pfizer CT.gov Call Center	Study Director
NCT01742299	Novartis Pharmaceuticals	Study Director
NCT01744665	Novartis Pharmaceuticals	Study Director
NCT01747876	Novartis Pharmaceuticals	Study Director
NCT01749969	Clinical Sciences &amp; Operations	Study Director
NCT01750918	GSK Clinical Trials	Study Director
NCT01752634	Novartis Pharmaceuticals	Study Director
NCT01760525	Novartis Pharmaceuticals	Study Director
NCT01762761	Novartis Pharmaceuticals	Study Director
NCT01763164	Array BioPharma	Study Director
NCT01764633	MD	Study Director
NCT01767467	GSK Clinical Trials	Study Director
NCT01769391	Call 1-877-CTLILLY (1-877-285-4559) or 1-317-615-4559 Mon - Fri 9 AM - 5 PM Eastern time (UTC/GMT - 5 hours, EST)	Study Director
NCT01771809	Pfizer CT.gov Call Center	Study Director
NCT01772563	Boehringer Ingelheim	Study Chair
NCT01774344	Bayer Study Director	Study Director
NCT01774786	Clinical Trials	Study Director
NCT01775618	Bayer Study Director	Study Director
NCT01776840	Janssen Research &amp; Development, LLC Clinical Trial	Study Director
NCT01780844	Senior Medical Director	Study Director
NCT01783444	Novartis Pharmaceuticals	Study Director
NCT01783938	Bristol-Myers Squibb	Study Director
NCT01784068	Novartis Pharmaceuticals	Study Director
NCT01790126	Aragon Pharmaceuticals, Inc Clinical Trial	Study Director
NCT01791153	Clinical Trials	Study Director
NCT01791491	Bristol-Myers Squibb	Study Director
NCT01792687	Aragon Pharmaceuticals, Inc Clinical Trial	Study Director
NCT01793441	Clinical Trials	Study Director
NCT01797965	Medical Director	Study Director
NCT01801111	Clinical Trials	Study Director
NCT01802879	Novartis Pharmaceuticals	Study Director
NCT01806597	Novartis Pharmaceuticals	Study Director
NCT01807520	Novartis Pharmaceuticals	Study Director
NCT01814826	Medical Monitor	Study Director
NCT01815840	Clinical Trials	Study Director
NCT01828099	Novartis Pharmaceuticals	Study Director
NCT01828112	Novartis Pharmaceuticals	Study Director
NCT01829711	MedImmune LLC	Study Director
NCT01830816	Medical Monitor	Study Director
NCT01833169	Novartis Pharmaceuticals	Study Director
NCT01837641	Call 1-877-CTLILLY (1-877-285-4559) or 1-317-615-4559 Mon - Fri 9 AM - 5 PM Eastern time (UTC/GMT - 5 hours, EST)	Study Director
NCT01844505	Bristol-Myers Squibb	Study Director
NCT01844518	Bristol-Myers Squibb	Study Director
NCT01844765	Novartis Pharmaceuticals	Study Director
NCT01846416	Clinical Trials	Study Director
NCT01849874	Array BioPharma	Study Director
NCT01850524	Medical Monitor	Study Director
NCT01852292	Novartis Pharmaceuticals	Study Director
NCT01853878	GSK Clinical Trials	Study Director
NCT01854606	Novartis Pharmaceuticals	Study Director
NCT01854918	MD	Study Director
NCT01855750	Janssen Research &amp; Development, LLC Clinical Trial	Study Director
NCT01855789	Clinical Trials	Study Director
NCT01856309	Janssen Research &amp; Development, LLC Clinical Trial	Study Director
NCT01860976	Bristol-Myers Squibb	Study Director
NCT01862328	Medical Monitor	Study Director
NCT01863732	Novartis Pharmaceuticals	Study Director
NCT01866319	Medical Director	Study Director
NCT01867125	Clinical Trials	Study Director
NCT01868061	Clinical Trials	Study Director
NCT01870778	Novartis Pharmaceuticals	Study Director
NCT01871805	Clinical Trials	Study Director
NCT01877655	Medical Director	Study Director
NCT01885195	Array BioPharma	Study Director
NCT01887912	Medical Director	Study Director
NCT01888432	Novartis Pharmaceuticals	Study Director
NCT01890421	Bayer Study Director	Study Director
NCT01890434	Bayer Study Director	Study Director
NCT01890746	Novartis Pharmaceuticals	Study Director
NCT01891643	Bristol-Myers Squibb	Study Director
NCT01892436	Novartis Pharmaceuticals	Study Director
NCT01896531	Clinical Trials	Study Director
NCT01896895	Merz Medical Expert	Study Director
NCT01897532	Boehringer Ingelheim	Study Chair
NCT01897896	Teva Medical Expert, MD	Study Director
NCT01898078	Medical Monitor	Study Director
NCT01900574	Janssen Research &amp; Development, LLC Clinical Trial	Study Director
NCT01900665	Call 1-877-CTLILLY (1-877-285-4559) or 1-317-615-4559 Mon - Fri 9 AM - 5 PM Eastern time (UTC/GMT - 5 hours, EST)	Study Director
NCT01903993	Clinical Trials	Study Director
NCT01905657	Medical Director	Study Director
NCT01905683	Merz Medical Expert	Study Director
NCT01909453	Array BioPharma	Study Director
NCT01910402	GSK Clinical Trials	Study Director
NCT01911598	Clinical Trials	Study Director
NCT01915303	Novartis Pharmaceuticals	Study Director
NCT01915576	Bayer Study Director	Study Director
NCT01915602	Bayer Study Director	Study Director
NCT01921205	UCB Cares	Study Director
NCT01922011	Medical Director	Study Director
NCT01927419	Bristol-Myers Squibb	Study Director
NCT01928368	MD	Study Director
NCT01928459	Novartis Pharmaceuticals	Study Director
NCT01931566	Medical Director	Study Director
NCT01934790	Bayer Study Director	Study Director
NCT01936363	Medical Responsible	Study Director
NCT01938638	Bayer Study Director	Study Director
NCT01939899	Medical Monitor	Study Director
NCT01942135	Pfizer CT.gov Call Center	Study Director
NCT01945489	Medical Director	Study Director
NCT01950819	Novartis Pharmaceuticals	Study Director
NCT01951586	MD	Study Director
NCT01952574	MD	Study Director
NCT01953783	Medical Monitor	Study Director
NCT01954043	GSK Clinical Trials	Study Director
NCT01954394	Clinical Sciences &amp; Operations	Study Director
NCT01955733	Boehringer Ingelheim	Study Chair
NCT01956110	Clinical Development Support	Study Director
NCT01956123	Clinical Development Support	Study Director
NCT01957150	GSK Clinical Trials	Study Director
NCT01958021	Novartis Pharmaceuticals	Study Director
NCT01965652	Shionogi Clinical Trials Administrator Clinical Support Help Line	Study Director
NCT01966471	Clinical Trials	Study Director
NCT01968031	Kyowa Hakko Kirin Pharma, Inc.	Study Chair
NCT01971476	Boehringer Ingelheim	Study Chair
NCT01972568	Medical Responsible	Study Director
NCT01973868	Bayer Study Director	Study Director
NCT01974206	Medical Director	Study Director
NCT01974440	Janssen Research &amp; Development, LLC Clinical Trial	Study Director
NCT01975389	Pfizer CT.gov Call Center	Study Director
NCT01975701	Novartis Pharmaceuticals	Study Director
NCT01977651	Sr. Medical Director	Study Director
NCT01984242	Clinical Trials	Study Director
NCT01984424	MD	Study Director
NCT01984697	Medical Director	Study Director
NCT01985126	Janssen Research &amp; Development, LLC Clinical Trial	Study Director
NCT01986010	Medical Director	Study Director
NCT01989468	Novartis Pharmaceuticals	Study Director
NCT01989676	Pfizer CT.gov Call Center	Study Director
NCT01989754	Janssen Research &amp; Development, LLC Clinical Trial	Study Director
NCT01991184	Clinical Trials	Study Director
NCT01991210	Clinical Trials	Study Director
NCT01994889	Pfizer CT.gov Call Center	Study Director
NCT01995188	Clinical Trials	Study Director
NCT01995513	Medical Director	Study Director
NCT01998880	Clinical Trials	Study Director
NCT01999218	Medical Director	Study Director
NCT02000427	MD	Study Director
NCT02003573	Boehringer Ingelheim	Study Chair
NCT02005471	Clinical Trials	Study Director
NCT02006641	Email contact via H. Lundbeck A/S	Study Director
NCT02006654	Email contact via H. Lundbeck A/S	Study Director
NCT02007512	Medical Director	Study Director
NCT02007629	Bayer Study Director	Study Director
NCT02008227	Clinical Trials	Study Director
NCT02008916	Novartis Pharmaceuticals	Study Director
NCT02009488	Janssen Research &amp; Development, LLC Clinical Trial	Study Director
NCT02013167	MD	Study Director
NCT02014116	Call 1-877-CTLILLY (1-877-285-4559 or 1-317-615-4559 Mon-Fri 9 AM to 5 PM Eastern time (UTC/GMT - 5 hours, EST	Study Director
NCT02014441	MD	Study Director
NCT02014558	Executive Medical Director	Study Director
NCT02016534	MD	Study Director
NCT02019602	UCB Cares	Study Director
NCT02020889	GSK Clinical Trials	Study Director
NCT02022215	Meiji Study Director	Study Director
NCT02023697	Bayer Study Director	Study Director
NCT02023879	Clinical Sciences &amp; Operations	Study Director
NCT02027961	MedImmune LLC	Study Director
NCT02031276	Boehringer Ingelheim	Study Chair
NCT02031458	Clinical Trials	Study Director
NCT02033889	Medical Director	Study Director
NCT02034552	Bayer Study Director	Study Director
NCT02038647	Medical Monitor	Study Director
NCT02038764	Pfizer CT.gov Call Center	Study Director
NCT02038933	Bristol-Myers Squibb	Study Director
NCT02038946	Bristol-Myers Squibb	Study Director
NCT02039947	GSK Clinical Trials	Study Director
NCT02040584	Novartis Pharmaceuticals	Study Director
NCT02041533	Bristol-Myers Squibb	Study Director
NCT02043678	Bayer Study Director	Study Director
NCT02045862	Medical Director	Study Director
NCT02046070	Medical Monitor	Study Director
NCT02051608	Clinical Trials	Study Director
NCT02053610	Clinical Trials	Study Director
NCT02054130	MedImmune LLC	Study Director
NCT02054806	Medical Director	Study Director
NCT02055118	Shire Study Physician	Study Director
NCT02057380	Executive Medical Director	Study Director
NCT02057692	Shire Study Physician	Study Director
NCT02059291	Novartis Pharmaceuticals	Study Director
NCT02064426	Bayer Study Director	Study Director
NCT02064439	Bayer Study Director	Study Director
NCT02066636	Bristol-Myers Squibb	Study Director
NCT02070978	Medical Responsible	Study Director
NCT02075840	Clinical Trials	Study Director
NCT02076009	Janssen Research &amp; Development, LLC Clinical Trial	Study Director
NCT02076412	Rigel Pharmaceuticals, Inc.	Study Director
NCT02089685	Medical Director	Study Director
NCT02091739	Merz Medical Expert	Study Director
NCT02092792	Clinical Trials	Study Director
NCT02096263	GSK Clinical Trials	Study Director
NCT02099656	Clinical Trials	Study Director
NCT02100228	Pfizer CT.gov Call Center	Study Director
NCT02102204	MD	Study Director
NCT02102490	Call 1-877-CTLILLY (1-877-285-4559) or 1-317-615-4559 Mon - Fri 9 AM - 5 PM Eastern time (UTC/GMT - 5 hours, EST)	Study Director
NCT02104947	Boehringer Ingelheim	Study Chair
NCT02105636	Bristol-Myers Squibb	Study Director
NCT02105688	Medical Director	Study Director
NCT02105948	GSK Clinical Trials	Study Director
NCT02105961	GSK Clinical Trials	Study Director
NCT02106832	Bayer Study Director	Study Director
NCT02107703	Call 1-877-CTLILLY (1-877-285-4559) or 1-317-615-4559 Mon - Fri 9 AM - 5 PM Eastern time (UTC/GMT - 5 hours, EST)	Study Director
NCT02108652	Clinical Trials	Study Director
NCT02110082	Bristol-Myers Squibb	Study Director
NCT02116803	Novartis Pharmaceuticals	Study Director
NCT02117570	Pfizer CT.gov Call Center	Study Director
NCT02120352	GSK Clinical Trials	Study Director
NCT02129205	Pfizer CT.gov Call Center	Study Director
NCT02130193	GSK Clinical Trials	Study Director
NCT02131064	Clinical Trials	Study Director
NCT02131233	Medical Director	Study Director
NCT02132949	Clinical Trials	Study Director
NCT02133742	Pfizer CT.gov Call Center	Study Director
NCT02135692	GSK Clinical Trials	Study Director
NCT02136134	Janssen Research &amp; Development, LLC Clinical trial	Study Director
NCT02137772	Medical Director	Study Director
NCT02142738	Medical Director	Study Director
NCT02149420	Novartis Pharmaceuticals	Study Director
NCT02150967	Novartis Pharmaceuticals	Study Director
NCT02154776	Novartis Pharmaceuticals	Study Director
NCT02159066	Array BioPharma	Study Director
NCT02159365	Bristol-Myers Squibb	Study Director
NCT02164513	GSK Clinical Trials	Study Director
NCT02174861	MD	Study Director
NCT02179918	Pfizer CT.gov Call Center	Study Director
NCT02181413	Medical Director Clinical Science	Study Director
NCT02181673	Janssen Research &amp; Development, LLC Clinical Trial	Study Director
NCT02186873	Janssen Research &amp; Development, LLC Clinical Trial	Study Director
NCT02187861	Clinical Trials	Study Director
NCT02191579	Medical Director	Study Director
NCT02194985	Medical Monitor, Clinical Research, MD	Study Director
NCT02197572	Medical Director Clinical Science	Study Director
NCT02199691	Medical Director	Study Director
NCT02202551	Clinical Trials Director	Study Director
NCT02202759	Medical Director Clinical Science	Study Director
NCT02202785	Medical Director Clinical Science	Study Director
NCT02203331	Bayer Study Director	Study Director
NCT02203838	Indivior Inc.	Study Director
NCT02203851	Boehringer Ingelheim	Study Chair
NCT02205398	Novartis Pharmaceuticals	Study Director
NCT02207231	Janssen Research &amp; Development, LLC Clinical Trial	Study Director
NCT02207244	Janssen Research &amp; Development, LLC Clinical Trial	Study Director
NCT02207634	MD	Study Director
NCT02217566	Janssen Research &amp; Development, LLC Clinical Trial	Study Director
NCT02221882	Call 1-877-CTLILLY (1-877-285-4559) or 1-317-615-4559 Mon - Fri 9 AM - 5 PM Eastern time (UTC/GMT - 5 hours, EST)	Study Director
NCT02221960	Medimmune Medimmune	Study Director
NCT02222493	Pfizer CT.gov Call Center	Study Director
NCT02229851	Global Clinical Registry (GCR, 1452)	Study Director
NCT02231749	Bristol-Myers Squibb	Study Director
NCT02240680	Boehringer Ingelheim	Study Chair
NCT02242942	Clinical Trials	Study Director
NCT02246621	Call 1-877-CTLILLY (1-877-285-4559) or 1-317-615-4559 Mon - Fri 9 AM - 5 PM Eastern time (UTC/GMT - 5 hours, EST)	Study Director
NCT02252042	Medical Director	Study Director
NCT02252263	Bristol-Myers Squibb	Study Director
NCT02255097	Medical Director	Study Director
NCT02256436	Medical Director	Study Director
NCT02257736	Janssen Research &amp; Development, LLC Clinical Trial	Study Director
NCT02259114	Medical Director	Study Director
NCT02260986	Clinical Trial Management	Study Director
NCT02261467	Medical Director	Study Director
NCT02261493	Medical Director	Study Director
NCT02262728	Janssen Research &amp; Development, LLC Clinical Trial	Study Director
NCT02262741	MedImmune LLC	Study Director
NCT02275780	Medical Director	Study Director
NCT02278120	Novartis Pharmaceuticals	Study Director
NCT02278133	Clinical Trial Call Center	Study Director
NCT02279173	MD	Study Director
NCT02279862	Bristol-Myers Squibb	Study Director
NCT02284893	AstraZeneca	Study Director
NCT02295748	Marathon Bioscience Center	Study Director
NCT02302066	Program Medical Director	Study Director
NCT02304484	MD	Study Director
NCT02307656	Bristol-Myers Squibb	Study Director
NCT02309671	Clinical Development Support	Study Director
NCT02310802	Clinical Study Director	Study Director
NCT02315703	Crucell Holland BV Clinical Trials	Study Director
NCT02316353	Global Clinical Program Director	Study Director
NCT02321800	Shionogi Clinical Trials Administrator Clinical Support Help Line	Study Director
NCT02326272	UCB Cares	Study Director
NCT02326298	UCB Cares	Study Director
NCT02327013	Email contact via H. Lundbeck A/S	Study Director
NCT02338609	Novartis Pharmaceuticals	Study Director
NCT02349295	Call 1-877-CTLILLY (1-877-285-4559) or 1-317-615-4559 Mon - Fri 9 AM - 5 PM Eastern time (UTC/GMT - 5 hours, EST)	Study Director
NCT02784002	Medical Director	Study Director

## Sheet: 2_Completed_Person
NCT Number	Last name	Role
NCT00000431	David J. Margolis, MD	Principal Investigator
NCT00029614	Oscar G. Bukstein, MD	Principal Investigator
NCT00031629	Martee Hensley	Principal Investigator
NCT00039195	Craig Moskowitz, MD	Study Chair
NCT00040690	Simon Clawson	Study Chair
NCT00045305	Selina M. Luger, MD	Study Chair
NCT00054444	Peter Rose	Principal Investigator
NCT00059332	Frank Pratt, MD	Principal Investigator
NCT00059332	Jeffrey Saver, M.D.	Principal Investigator
NCT00059332	Marc Eckstein, M.D.	Principal Investigator
NCT00059332	Samuel Stratton, MD	Principal Investigator
NCT00059332	Sidney Starkman, M.D.	Principal Investigator
NCT00070109	Sylvain Baruchel, MD	Principal Investigator
NCT00071981	Craig L. Slingluff, MD	Study Chair
NCT00072384	Rima Jubran	Principal Investigator
NCT00073983	Elizabeth Fox, MD	Principal Investigator
NCT00073983	Shreyaskumar R. Patel, MD	Principal Investigator
NCT00074412	Daya Moodley, MSc, PhD	Study Chair
NCT00074412	Hoosen M. Coovadia, MD, MBBS	Study Chair
NCT00074412	Laura Guay, MD	Study Chair
NCT00074412	Wafaie Fawzi, MD, PhD	Study Chair
NCT00074412	Yvonne Maldonado, MD	Study Chair
NCT00074425	Gita Ramjee, PhD	Study Chair
NCT00074425	Groesbeck Parham, MD	Study Chair
NCT00074425	Irving Hoffman, PA, MPH	Study Chair
NCT00074425	Lisa Maslankowski, MD	Study Chair
NCT00074425	Nancy Padian, PhD	Study Chair
NCT00074425	Salim Abdool Karim, MBChB, PhD	Study Chair
NCT00074425	Taha Taha, MD	Study Chair
NCT00074581	Myron S. Cohen, MD	Study Chair
NCT00076232	Anna Wald, MD, MPH	Study Chair
NCT00076232	Connie Celum, MD, MPH	Study Chair
NCT00076817	Peter Anton, MD	Principal Investigator
NCT00077376	Stacy Moulder	Principal Investigator
NCT00077441	George Kim	Principal Investigator
NCT00078442	David Asmuth, MD	Study Chair
NCT00079040	Alan Sandler	Principal Investigator
NCT00080938	H. I. Robins, MD, PhD	Study Chair
NCT00081276	Lydia Usha	Principal Investigator
NCT00082758	Paul M Sondel, MD, PhD	Study Chair
NCT00082758	Suzanne Shusterman, MD	Study Chair
NCT00082797	Jana Portnow, MD	Study Chair
NCT00082797	Stuart A. Grossman, MD	Study Chair
NCT00083187	Francis J. Giles, MD	Study Chair
NCT00084136	James Hakim, MscClinEpi, FRCP	Study Chair
NCT00084136	Nagalingeswaran Kumarasamy, MD	Study Chair
NCT00084136	Thomas B. Campbell, MD	Study Chair
NCT00084136	Timothy Flanigan, MD	Study Chair
NCT00084721	Marwan Fakih, MD	Principal Investigator
NCT00085254	Louis Nabors, MD	Principal Investigator
NCT00085449	Sherif S. Farag, MD, PhD	Study Chair
NCT00085540	Howard Fine	Principal Investigator
NCT00085852	John J. Reilly, MD	Principal Investigator
NCT00086190	Irene Richard, MD	Principal Investigator
NCT00086190	William McDonald, MD	Principal Investigator
NCT00087100	David S. Miller, MD	Study Chair
NCT00087126	James V. Fiorica, MD	Study Chair
NCT00089505	Frederick Sawe, MD	Study Chair
NCT00089505	Shahin Lockman, MD, MSc	Study Chair
NCT00090987	Ariela Noy, MD	Study Chair
NCT00090987	Henry Koon, MD	Study Chair
NCT00091507	Harry Selker, MD, MSPH	Study Chair
NCT00091507	James Udelson, MD	Principal Investigator
NCT00091507	Ralph D'Agostino, PhD	Principal Investigator
NCT00091819	G. Ralph Corey, MD	Principal Investigator
NCT00091949	Walter N. Kernan, M.D.	Principal Investigator
NCT00093496	Paul Haluska	Principal Investigator
NCT00094172	Emmanuelle Waubant, MD, PhD	Study Chair
NCT00094172	Scott Zamvil, MD, PhD	Study Chair
NCT00094302	Sonja M. McKinlay, PhD	Principal Investigator
NCT00094705	Anna Durbin, MD	Principal Investigator
NCT00094718	Anna Durbin, MD	Principal Investigator
NCT00095628	Eric Winquist	Principal Investigator
NCT00095979	Don Dizon	Principal Investigator
NCT00096109	Elaina Gartner	Principal Investigator
NCT00096499	Tomasz Beer	Principal Investigator
NCT00096941	Mika Derynck, M.D.	Study Director
NCT00096954	Karin Rosen, MD, PhD	Study Director
NCT00096993	Virginia Patton, M.D.	Study Director
NCT00097019	Julie Hambleton, M.D.	Study Director
NCT00098397	Massimo Cristofanilli	Principal Investigator
NCT00098761	Sri Gururangan, MRCP (UK)	Study Chair
NCT00098956	Glennwood Goss	Principal Investigator
NCT00099580	Lisa Porter, MD	Study Director
NCT00099632	Deborah McMahon, MD	Study Chair
NCT00099632	Jane Hitti, MD, MPH	Study Chair
NCT00099671	Irini Sereti, MD	Study Chair
NCT00099671	Michael M. Lederman, MD	Study Chair
NCT00099983	John H. Krystal	Study Chair
NCT00100295	Wendy Weber, ND, MPH	Principal Investigator
NCT00100750	Banu Arun	Principal Investigator
NCT00100789	Omer Kucuk, MD	Principal Investigator
NCT00100945	Aminah Jatoi, MD	Study Chair
NCT00101010	Maria A. Rodriguez, MD	Study Chair
NCT00101153	Joseph Brandwein, MD	Study Chair
NCT00101270	Lisa McGregor	Principal Investigator
NCT00101283	Nasser H. Hanna, MD	Study Chair
NCT00101283	Scott Okuno, MD	Study Chair
NCT00101348	Alain Mita	Principal Investigator
NCT00102531	Renu Gupta, MD	Study Chair
NCT00102531	Richard Gorlick, MD	Principal Investigator
NCT00102674	Steven Steinhubl, MD	Principal Investigator
NCT00102687	CL Beach	Study Director
NCT00102960	Avy Violari, MBChB, FCP (SA)	Study Chair
NCT00102960	James McIntyre, MBChB, MRCOG	Principal Investigator
NCT00102960	Mark F. Cotton, MBChB, MMed	Study Chair
NCT00103012	Scott R Penzak, Pharm.D.	Principal Investigator
NCT00103142	Michael A. Morse, MD	Study Chair
NCT00103194	Glenn Liu	Principal Investigator
NCT00103207	Suresh Ramalingam, MD	Study Chair
NCT00103259	Jill Gilbert	Principal Investigator
NCT00103311	Syma Iqbal, MD	Principal Investigator
NCT00103337	Maha Hussain	Principal Investigator
NCT00103402	John Kusek, PhD	Study Director
NCT00103402	Leroy Nyberg, MD PhD	Study Director
NCT00103714	Amy Schaberg, BSN	Study Director
NCT00103935	Lisa Porter, MD	Study Director
NCT00103948	Margaret Moline, Ph.D.	Study Director
NCT00104299	John H. Stone, MD, MPH	Study Chair
NCT00104299	Ulrich Specks, MD	Study Chair
NCT00104377	Paul H. Ratner, MD	Principal Investigator
NCT00104390	Michael J. Noonan, MD	Principal Investigator
NCT00104520	Karen McCoy, MD	Principal Investigator
NCT00104637	Steven M Kawut, M.D., M.S.	Principal Investigator
NCT00104767	Edward Garon, MD	Principal Investigator
NCT00104897	Timothy Eisen	Study Chair
NCT00104910	Kathleen Moore	Principal Investigator
NCT00104962	Stacey Berg	Principal Investigator
NCT00104988	Joseph I. Clark, MD	Study Chair
NCT00104988	Laura F. Hutchins, MD	Principal Investigator
NCT00105053	Charles J. Link, M.D.	Study Chair
NCT00105183	Elbert P Trulock III, MD	Principal Investigator
NCT00105235	J. Richard Thistlethwaite, MD	Principal Investigator
NCT00105482	Stephanie O'Malley, PhD	Principal Investigator
NCT00105547	Ed Swabb, MD	Study Director
NCT00106119	Kong Y Chen, Ph.D.	Principal Investigator
NCT00106171	Joseph B. Margolick, MD, PhD	Principal Investigator
NCT00106184	Ann M. Reed, MD	Principal Investigator
NCT00106184	Chester V. Oddis, MD	Principal Investigator
NCT00106314	Paul A. Litka, MD	Study Director
NCT00106366	Christoph Koenen, MD	Study Director
NCT00106431	Jean Nichols, Ph.D.	Study Director
NCT00106860	Murray Stein, MD	Study Chair
NCT00107003	Teri N Kreisl, M.D.	Principal Investigator
NCT00107120	Daniel Ventura, PhD	Study Director
NCT00107159	Antoni Ribas, MD	Study Chair
NCT00107185	Joseph L. Lasky, MD	Principal Investigator
NCT00107211	Brian J. Czerniecki, MD, PhD	Principal Investigator
NCT00107263	Stephanie Hines, MD	Study Chair
NCT00107276	Anne F. Schott, MD	Study Chair
NCT00107276	Kathy S. Albain, MD	Study Chair
NCT00107341	Aminah Jatoi, MD	Study Chair
NCT00107380	Jonathan W. Friedberg, MD	Study Chair
NCT00107380	Richard I. Fisher, MD	Study Director
NCT00107419	Ernest C. Borden, MD	Study Chair
NCT00107419	George D. Demetri, MD	Study Chair
NCT00107419	Margaret von Mehren, MD	Study Chair
NCT00107419	Vivien H.C. Bramwell, MB, BS, PhD, FRCP	Study Chair
NCT00107419	Warren A. Chow, MD	Study Chair
NCT00107445	Christina Chu	Principal Investigator
NCT00107458	Heidi V. Russell, MD	Study Chair
NCT00107458	Jack M. Su, MD	Study Chair
NCT00107484	Karen A. Kurdziel, MD	Study Chair
NCT00107510	Vivek Roy, MD, FACP	Study Chair
NCT00107523	Stephen H. Petersdorf, MD	Principal Investigator
NCT00107536	Tanios Bekaii-Saab	Principal Investigator
NCT00107770	Robert Ferrante, PhD MSc	Principal Investigator
NCT00107835	Alicia Barba, MD	Principal Investigator
NCT00107887	Betina Durovni, M.D.	Study Chair
NCT00107887	Richard E Chaisson, M.D.	Principal Investigator
NCT00107887	Valeria Saraceni, MD	Study Director
NCT00107952	G. Ralph Corey, MD	Principal Investigator
NCT00107978	G. Ralph Corey, MD	Principal Investigator
NCT00107991	Joel Gelfand, MD	Principal Investigator
NCT00108069	Katherine Warren, M.D.	Principal Investigator
NCT00108160	Suzanne Bradley, MD	Principal Investigator
NCT00108732	Robert DiPaola	Principal Investigator
NCT00108810	David Borenstein, MD	Principal Investigator
NCT00108810	H F Farmer, MD	Principal Investigator
NCT00108810	Joseph A Markenson, MD	Principal Investigator
NCT00108810	Larry Gilderman, DO	Principal Investigator
NCT00108810	Soledad Lee, MD	Principal Investigator
NCT00109005	Steven K Libutti, M.D.	Principal Investigator
NCT00109161	Alireza Minagar, M.D.	Principal Investigator
NCT00109161	Andrew Goodman, M.D.	Principal Investigator
NCT00109161	Christopher Bever, M.D	Principal Investigator
NCT00109161	Clyde Markowitz, M.D.	Principal Investigator
NCT00109161	Daniel Wynn, M.D.	Principal Investigator
NCT00109161	Ed Fox, M.D.	Principal Investigator
NCT00109161	Florian P. Thomas, M.D.	Principal Investigator
NCT00109161	Francois Jacques, M.D.	Principal Investigator
NCT00109161	Gregg G. Blevins, M.D.	Principal Investigator
NCT00109161	Herman Sullivan, M.D.	Principal Investigator
NCT00109161	Istvan Pirko, M.D.	Principal Investigator
NCT00109161	James R. Storey	Principal Investigator
NCT00109161	Jayne Martin, M.D.	Principal Investigator
NCT00109161	Jeffery Dunn, M.D.	Principal Investigator
NCT00109161	Jeffrey English, M.D.	Principal Investigator
NCT00109161	Joanna Cooper	Principal Investigator
NCT00109161	John W. Rose, M.D.	Principal Investigator
NCT00109161	Jonathan L. Carter, M.D.	Principal Investigator
NCT00109161	Joseph Herbert, M.D.	Principal Investigator
NCT00109161	Kasper Lloyd, M.D.	Principal Investigator
NCT00109161	Malcolm Gottesman, M.D.	Principal Investigator
NCT00109161	Marcelo Kremenchutzky, M.D.	Principal Investigator
NCT00109161	Maria Melanson, M.D.	Principal Investigator
NCT00109161	MaryAnn Picone, M.D.	Principal Investigator
NCT00109161	Michael Kaufman, M.D.	Principal Investigator
NCT00109161	Michael Yeung, M.D.	Principal Investigator
NCT00109161	Neil Lava, M.D.	Principal Investigator
NCT00109161	Omar Khan, M.D.	Principal Investigator
NCT00109161	Richard Dickson, M.D.	Principal Investigator
NCT00109161	S. Mitchell Freedman, M.D.	Principal Investigator
NCT00109161	Sharon Lynch, M.D.	Principal Investigator
NCT00109161	Steven Pugh, M.D.	Principal Investigator
NCT00109161	Theodore J. Phillips, M.D.	Principal Investigator
NCT00109161	Timothy Vollmer, M.D.	Principal Investigator
NCT00109161	William Honeycutt, M.D.	Principal Investigator
NCT00109161	Yves Lapierrre, M.D.	Principal Investigator
NCT00109473	Lee Denson, M.D.	Principal Investigator
NCT00109512	Laura Williams, MD	Study Director
NCT00109590	Gonzague J. Jourdain, MD	Study Chair
NCT00109590	Russell Van Dyke, MD	Study Chair
NCT00109681	James Pennington, MD	Study Director
NCT00109733	Sanja Dragnic, MD	Study Director
NCT00109811	H. Richard Alexander	Principal Investigator
NCT00109824	Kristie Blum	Principal Investigator
NCT00109837	Frederick R. Appelbaum, MD	Principal Investigator
NCT00109837	Jerry Radich, MD	Study Chair
NCT00109863	Mark R. Albertini, MD	Study Chair
NCT00109928	Daruka Mahadevan, MD, PhD	Study Chair
NCT00109954	Brian I. Carr, MD	Study Chair
NCT00109967	Stephen Ansell	Principal Investigator
NCT00109993	Mary Laughlin, MD	Principal Investigator
NCT00110019	Keith Flaherty	Principal Investigator
NCT00110045	Claudio Viscoli, MD	Study Chair
NCT00110058	Brenda Sandmaier, MD	Principal Investigator
NCT00110071	Ajay Gopal	Principal Investigator
NCT00110084	Philip J. Stella, MD	Study Chair
NCT00110084	Timothy J. Hobday, M.D.	Principal Investigator
NCT00110084	Tom R. Fitch, M.D.	Principal Investigator
NCT00110084	Vivek Roy, MD, FACP	Study Chair
NCT00110188	Frank Haluska, M.D.	Study Director
NCT00110214	William Kelly	Principal Investigator
NCT00110253	William Garland, MD	Principal Investigator
NCT00110279	Ruth A. Karron, MD	Principal Investigator
NCT00110396	Bettina Stubinski, MD	Study Director
NCT00110461	Margaretta Nyilas, MD	Study Director
NCT00110513	Robert C Tait, MD	Principal Investigator
NCT00110552	Barry Oken, MD	Principal Investigator
NCT00110695	Norman Wolmark, MD	Principal Investigator
NCT00110747	Tina Alster, MD	Principal Investigator
NCT00110760	Michael Gold, MD	Principal Investigator
NCT00110773	Tina Alster, MD	Principal Investigator
NCT00110812	Jorge Tavel, MD	Study Chair
NCT00111579	Robert Walker, MD	Study Director
NCT00111618	Roberto Pili, MD	Principal Investigator
NCT00111696	Stergios Moschos, MD	Principal Investigator
NCT00111748	Klaus Hollmig, MD	Principal Investigator
NCT00111839	Joan Schiller, MD	Principal Investigator
NCT00111839	Mark Socinski, MD	Principal Investigator
NCT00111852	Leslie Lipka, MD	Study Director
NCT00111904	John S. MacDonald, MD	Study Chair
NCT00112021	Lisa Porter, MD	Study Director
NCT00112112	Raburn Mallory, MD	Study Director
NCT00112151	Robert S. Schwartz, MD	Principal Investigator
NCT00112359	Bruce Montgomery, MD	Study Director
NCT00112372	Frank Haluska, M.D.	Study Director
NCT00112385	Anthony A Amato, MD	Principal Investigator
NCT00112476	Gary Hudes	Principal Investigator
NCT00112489	Matthew A. Powell, MD	Study Chair
NCT00112502	Marta Penas-Prado, MD	Study Chair
NCT00112528	George P. Kim, MD	Study Chair
NCT00112580	Steven A. Rosenberg, MD, PhD	Principal Investigator
NCT00112645	Kenneth G. Lucas, MD	Principal Investigator
NCT00112671	Srikala Sridhar	Principal Investigator
NCT00112736	Patrick Wen, MD	Principal Investigator
NCT00112840	Jaime Merchan	Principal Investigator
NCT00112853	Judith Karp	Principal Investigator
NCT00112866	Mark Gilbert	Principal Investigator
NCT00112996	Ying Guo, MD, MS	Principal Investigator
NCT00113204	David S. Siegel, MD; Ph.D	Principal Investigator
NCT00113204	Ivan Borrello, MD	Principal Investigator
NCT00113204	Paul Richardson, MD	Principal Investigator
NCT00113204	Sundar Jagannath, MD	Principal Investigator
NCT00113217	Eric Jonasch, MD	Principal Investigator
NCT00113230	Christopher H. Crane, MD	Principal Investigator
NCT00113334	Edward S. Kim, MD	Principal Investigator
NCT00113347	Bonnie S. Glisson, MD	Principal Investigator
NCT00113360	James Yao, M.D.	Principal Investigator
NCT00113373	Agustin Garcia	Principal Investigator
NCT00113490	M Pamela Griffin, M.D.	Study Director
NCT00113724	Michael Kurman, MD	Study Director
NCT00113750	Karl Jürgen Fischer von Weikersthal-Drachenberg, MD	Study Chair
NCT00113984	James L Gulley, M.D.	Principal Investigator
NCT00114166	Thomas J. Herzog, MD	Study Chair
NCT00114179	Christopher Crane	Principal Investigator
NCT00114218	Brigitte Miller	Principal Investigator
NCT00114257	Jean-Pierre Issa, MD	Study Chair
NCT00114283	Christopher Thomas	Principal Investigator
NCT00114452	Joshua Hare, MD	Principal Investigator
NCT00114530	Daniel Furst, MD	Study Chair
NCT00114530	Keith Sullivan, MD	Study Chair
NCT00114530	Leslie Crofford, MD	Principal Investigator
NCT00114530	Maureen Mayes, MD, MPH	Principal Investigator
NCT00114530	Peter McSweeney, MD	Study Chair
NCT00114530	Richard Nash, MD	Principal Investigator
NCT00114569	James Chamberlain, MD	Principal Investigator
NCT00115089	Eli Meltzer, M.D.	Principal Investigator
NCT00115089	Elliott Grossbard, M.D.	Study Director
NCT00115089	Harold Nelson, M.D.	Principal Investigator
NCT00115310	Jeffrey Tobias, MD	Study Director
NCT00115570	Dr Arethi PHILOTHEOU	Principal Investigator
NCT00115804	Lesley M Arnold, M.D.	Principal Investigator
NCT00115817	Andrew Selwyn, MD	Principal Investigator
NCT00115973	William Lyness, PhD	Study Director
NCT00115999	Steven R Deitcher, MD	Study Director
NCT00116129	Robert Bennett, MD	Principal Investigator
NCT00116168	Barbara White, M.D.	Study Director
NCT00116402	Imre Noth, M.D.	Principal Investigator
NCT00116506	Jeffrey Meyerhardt, MD	Principal Investigator
NCT00116610	David Karlin, MD	Study Director
NCT00116610	Hazel Breitz, MD	Study Director
NCT00116610	Paul Weiden, MD	Study Director
NCT00116649	Sharon Levy, MD	Study Director
NCT00116740	William R Shanahan, Jr., MD	Study Chair
NCT00116805	Anuj Gaggar, MD	Study Director
NCT00116857	Robert M. Carney, PhD	Study Chair
NCT00116961	Andrzej J Jakubowiak, MD, PhD	Principal Investigator
NCT00117403	Douglas Galasko, MD	Principal Investigator
NCT00117429	Marcus Altfeld, MD/PhD	Principal Investigator
NCT00117429	Mathias Lichterfeld, MD/PhD	Principal Investigator
NCT00117611	Robert M Naclerio, MD	Principal Investigator
NCT00117676	Anuj Gaggar, MD	Study Director
NCT00117845	Thomas A Waldmann, M.D.	Principal Investigator
NCT00117962	Ramaswamy Govindan, MD	Study Chair
NCT00117975	Myron S. Czuczman, MD	Study Chair
NCT00117988	Anas Younes	Principal Investigator
NCT00118040	Howard Bailey	Principal Investigator
NCT00118092	Elisabeth Heath	Principal Investigator
NCT00118144	David Gandara	Principal Investigator
NCT00118157	Elaina Gartner	Principal Investigator
NCT00118183	Rogerio Lilenbaum	Principal Investigator
NCT00118196	Robert K. Stuart, MD	Study Chair
NCT00118222	Robert J. Maciunas, MD	Study Chair
NCT00118261	Smitha Krishnamurthi, MD	Principal Investigator
NCT00118287	Bart Scott	Principal Investigator
NCT00118482	Robert S. Sheldon, MD PhD	Principal Investigator
NCT00118495	David M Ferguson, PhD, MD, FACCP	Study Director
NCT00118495	Julia R Heiman, PhD	Principal Investigator
NCT00118625	Deepen Patel, MD	Principal Investigator
NCT00118898	Eric Daar, MD	Study Chair
NCT00118898	Paul Sax, MD	Study Chair
NCT00118924	Anna Durbin, MD	Principal Investigator
NCT00118924	Peter Wright, MD	Principal Investigator
NCT00118989	Carmen E Guerra, M.D.	Principal Investigator
NCT00119080	Eric Stern, MD	Principal Investigator
NCT00119236	Archie Tse	Principal Investigator
NCT00119249	Anna Pavlick	Principal Investigator
NCT00119262	Kathy Miller	Principal Investigator
NCT00119301	Paul A. Meyers, MD	Study Chair
NCT00119340	Brenda Sandmaier, MD	Principal Investigator
NCT00119379	Grace A. McComsey, MD	Principal Investigator
NCT00119665	Deborah Grady, MD, MPH	Principal Investigator
NCT00119730	Jennifer R Brown, MD, PhD	Principal Investigator
NCT00120081	Gary Simon, M.D., Ph.D	Principal Investigator
NCT00120120	Victor Sloan, MD	Study Director
NCT00120250	Mark Pollack, M.D.	Principal Investigator
NCT00120471	Mark Mirochnick, MD	Study Chair
NCT00120471	Regis Kreitchmann, MD	Study Chair
NCT00120471	Taha Taha, MD, PhD	Study Chair
NCT00120874	Barry Reisberg, M.D.	Principal Investigator
NCT00120874	Sunnie Kenowsky, D.V.M.	Study Director
NCT00120926	Reese Clark, MD	Principal Investigator
NCT00121199	Alison Stopeck	Principal Investigator
NCT00121225	Naomi Balzer-Haas	Principal Investigator
NCT00121238	Maha Hussain	Principal Investigator
NCT00121264	Ulka Vaishampayan	Principal Investigator
NCT00121277	Eric X. Chen, MD, PhD	Principal Investigator
NCT00121290	Igor Puzanov	Principal Investigator
NCT00121732	Jenny Zhang, M.D.	Study Director
NCT00121849	Iván D Vélez Bernal, MD, PhD	Principal Investigator
NCT00121862	Franco M Piazza, MD, MPH	Study Director
NCT00122070	David J Rissmiller, DO	Principal Investigator
NCT00122278	Benjamin W. Friedman, MD, MS	Principal Investigator
NCT00122343	Frank Haluska, M.D., Ph.D.	Study Chair
NCT00122876	Sy-Shi Wang, PhD	Study Director
NCT00122954	Lynne Shinto, ND, MPH	Principal Investigator
NCT00123110	Anne R. Cappola, MD, ScM	Principal Investigator
NCT00123162	Richard Legro, M.D.	Principal Investigator
NCT00123253	Steven Grinspoon, MD	Principal Investigator
NCT00123630	John C. Fang, M.D.	Principal Investigator
NCT00123734	Jeff Ginsberg, MD FRCPC	Principal Investigator
NCT00123734	Jim Douketis, MD FRCPC	Principal Investigator
NCT00123955	Dalane W. Kitzman, MD	Principal Investigator
NCT00123968	Merlin Robb, MD	Study Chair
NCT00124007	Etienne Karita, MD	Principal Investigator
NCT00124007	Job Bwayo, MD, PhD	Principal Investigator
NCT00124020	G. Ralph Corey, MD	Principal Investigator
NCT00124124	Nina Bhardwaj, MD, PhD	Principal Investigator
NCT00124124	Sylvia Adams, MD	Study Director
NCT00124189	Stephen Kelsey, MD	Study Director
NCT00124306	Leroy M. Nyberg, Jr., Ph.D, M.D.	Study Director
NCT00124384	Michael Perlis, PhD	Principal Investigator
NCT00124605	Przemyslaw Twardowski	Principal Investigator
NCT00124618	Aminah Jatoi, MD	Study Chair
NCT00124657	Alberto Broniscer, MD	Principal Investigator
NCT00124865	David Tribble, MD, DrPH	Principal Investigator
NCT00124943	Jose' Iglesias, MD	Study Director
NCT00125255	Andrew Wiznia, MD	Principal Investigator
NCT00125255	Navil Sethna, MD	Principal Investigator
NCT00125255	Susan T. Verghese, MD	Principal Investigator
NCT00125333	Andria Langenberg, MD	Study Director
NCT00125359	Konstantin H Dragnev, MD	Principal Investigator
NCT00125398	James Jones, MD, PharmD	Study Director
NCT00125424	James Jones, PharmD, MD	Study Director
NCT00125515	Adam Bisaga, M.D.	Principal Investigator
NCT00125528	Thomas J Schnitzer, M.D., Ph.D.	Principal Investigator
NCT00125528	Vania Apkarian, Ph.D.	Principal Investigator
NCT00125749	Anna Karolina Palucka, MD, PhD	Study Director
NCT00125931	Beth L Murphy, MD, PhD	Principal Investigator
NCT00125944	Robert Walker, MD	Principal Investigator
NCT00125957	Beth L Murphy, MD, PhD	Principal Investigator
NCT00125970	Gavin Churchyard, MBBCh, FCP, MMed, PhD	Study Chair
NCT00125970	Michael Keefer, MD	Study Chair
NCT00126373	Eric L Altschuler, M.D., Ph.D.	Principal Investigator
NCT00126425	John Lombard	Study Director
NCT00126438	John Strohmeyer	Study Director
NCT00126490	Mayer Fishman	Principal Investigator
NCT00126503	Jeffrey Sosman	Principal Investigator
NCT00126542	Gini Fleming	Principal Investigator
NCT00126555	Randal Weber	Principal Investigator
NCT00126594	Eric Jonasch	Principal Investigator
NCT00126620	Lillian L. Siu, MD, FRCPC	Study Chair
NCT00126646	Robert Kreitman, MD	Principal Investigator
NCT00126880	Susan W Cox, Ph D	Study Director
NCT00127530	Andrew Blight, PhD	Study Director
NCT00127686	Ian M Paul, MD, MSc	Principal Investigator
NCT00127803	Richard Greenberg, MD	Principal Investigator
NCT00127803	Thomas Marbury, MD	Principal Investigator
NCT00128128	Kalpana Gupta, MD, MPH	Principal Investigator
NCT00128271	Eliot W Godofsky, MD, FACP	Principal Investigator
NCT00128401	Jennifer A Cameron, C.R.N.P.	Principal Investigator
NCT00128492	Bruce Montgomery, MD	Study Director
NCT00128505	Katherine Beebe, PhD	Study Director
NCT00128622	Michael A. Morse, MD	Study Chair
NCT00128700	Alba A. Brandes, MD	Study Chair
NCT00129259	Kevan Herold, MD	Principal Investigator
NCT00129337	David E Gerber, MD	Principal Investigator
NCT00129337	Lee Rosen, MD	Principal Investigator
NCT00129337	Lee S Schwartzberg, MD, FACP	Principal Investigator
NCT00129337	Linda Garland, MD	Principal Investigator
NCT00129337	Lucas Wong, MD	Principal Investigator
NCT00129337	Nuhad Ibrahim, MD	Principal Investigator
NCT00129441	David A Lewis, MD	Principal Investigator
NCT00129545	David Holmes, MD	Principal Investigator
NCT00129727	Richard T Penson, MRCP MD	Principal Investigator
NCT00129844	Robert Natale, M.D.	Study Chair
NCT00130169	Naseem Zojwalla, M.D.	Study Director
NCT00130182	Amy Schaberg, BSN	Study Director
NCT00130208	Dick deZeeuw, M.D.	Principal Investigator
NCT00130208	Edmund J Lewis, M.D.	Study Director
NCT00130208	Itamar Raz, M.D.	Principal Investigator
NCT00130208	Robert C Atkins, M.D.	Principal Investigator
NCT00130221	Robert A Weinstein, MD	Principal Investigator
NCT00130286	Marshall J Glesby, MD, PhD	Principal Investigator
NCT00130442	Anne Hamilton, PhD	Principal Investigator
NCT00130442	Damien Thomson, MD	Principal Investigator
NCT00130442	Michael Millward, MD	Study Chair
NCT00130520	David S Alberts, MD	Principal Investigator
NCT00130689	Jennifer A. Chan, MD	Principal Investigator
NCT00130702	Daniel J DeAngelo, MD, PhD	Principal Investigator
NCT00130728	Paula O'Connor, M.D.	Study Director
NCT00130780	Naiyer Rizvi, M.D.	Principal Investigator
NCT00130923	Alan I. Green, MD	Principal Investigator
NCT00131469	Brendan Lee, M.D., PhD	Principal Investigator
NCT00131469	Eric S Orwoll, M.D.	Principal Investigator
NCT00131469	Jay Shapiro, M.D.	Principal Investigator
NCT00131469	Sandra Veith, CRA	Principal Investigator
NCT00131677	Kata L Chillag, PhD	Principal Investigator
NCT00131677	Kenneth H. Mayer, MD	Principal Investigator
NCT00131677	Lisa A Grohskopf, MD, MPH	Principal Investigator
NCT00131677	Melanie Thompson, MD	Principal Investigator
NCT00131677	Susan Buchbinder, MD	Principal Investigator
NCT00131885	Patricia A. Murphy, DrPH	Principal Investigator
NCT00131911	Timothy Hobday	Principal Investigator
NCT00131937	Sandra Horning	Principal Investigator
NCT00131989	B. Smith	Principal Investigator
NCT00132015	Antonio T. Fojo, MD, PhD	Principal Investigator
NCT00132028	Mark Kirschbaum	Principal Investigator
NCT00132067	Susan Modesitt	Principal Investigator
NCT00132119	Philip Jochelson, MD	Study Director
NCT00132158	Lisa M McGregor, MD, PhD	Principal Investigator
NCT00132314	Robert A. Rosenheck, AB MD	Study Chair
NCT00132379	Suzanne Kilany	Study Director
NCT00132444	Kimberly Workowski, MD	Principal Investigator
NCT00132496	Yufang Lu	Study Director
NCT00132522	Joseph O'Connor, MD	Principal Investigator
NCT00132600	Joseph Fowler, Prof.	Principal Investigator
NCT00132691	Douglas Jabs, MD, MBA	Study Chair
NCT00132691	Janet T Holbrook, PhD, MPH	Study Director
NCT00132691	John Kempen, MD, PhD	Study Chair
NCT00132691	Michael Altaweel, MD	Study Director
NCT00133367	Karen K Ballen, MD	Principal Investigator
NCT00133952	Karl Beutner	Study Director
NCT00133991	Yvette L. Kasamon, MD	Study Chair
NCT00134043	Manisha Shah	Principal Investigator
NCT00134069	Wells Messersmith	Principal Investigator
NCT00134134	Bruce Strober, MD, PhD	Principal Investigator
NCT00134355	Kathleen W. Beekman, MD	Principal Investigator
NCT00134394	Melissa Magliocco, MD	Principal Investigator
NCT00135135	Wayne L Furman, MD	Principal Investigator
NCT00135330	James Malone, MD	Study Director
NCT00135668	Gregory Hammer, MD	Principal Investigator
NCT00135668	Scott Schulman, MD	Principal Investigator
NCT00135694	Abraham Shaked, MD, PhD	Study Chair
NCT00135759	Paolo Mannelli, M.D.	Principal Investigator
NCT00135785	Steve Shoptaw, Ph.D.	Principal Investigator
NCT00135798	Gregory T. Everson, MD	Study Chair
NCT00135798	James Everhart, MD	Study Director
NCT00135902	Elizabeth A Thom, PhD	Principal Investigator
NCT00135902	Margaret Harper, MD	Principal Investigator
NCT00135902	Uma Reddy, MD	Principal Investigator
NCT00135941	Lisa Jean-Louis	Study Director
NCT00136266	Paul L. Geltman, MD, MPH	Principal Investigator
NCT00136383	Wei Zhang, M.D., Ph.D.	Principal Investigator
NCT00136643	Michel G. Bergeron, MD, FRCPC	Principal Investigator
NCT00136786	Adam Bisaga, M.D.	Principal Investigator
NCT00136903	Philip McCarthy, MD	Principal Investigator
NCT00137969	Paul Brunetta, M.D.	Study Director
NCT00138177	Marwan Fakih	Principal Investigator
NCT00138203	Anne Traynor	Principal Investigator
NCT00138216	John P. Perentesis, MD	Study Chair
NCT00138216	Lars M. Wagner, MD	Study Chair
NCT00139152	Muhammad A Pasha, M.D.	Principal Investigator
NCT00139152	Robert G Townley, MD	Principal Investigator
NCT00140218	Lawrence H Phillips, M.D.	Principal Investigator
NCT00140452	Elijah Stommel	Principal Investigator
NCT00140478	Mary-Ellen Taplin, MD	Principal Investigator
NCT00140556	David M Brizel, MD	Principal Investigator
NCT00141024	Jorge Sanchez, MD	Study Chair
NCT00141024	Xia Jin, MD, PhD	Study Chair
NCT00141050	Matthew Brams, MD	Principal Investigator
NCT00141063	Ann Childress, MD	Principal Investigator
NCT00141778	Nancy J. Brown, M.D.	Principal Investigator
NCT00142428	Andrew X. Zhu, MD	Principal Investigator
NCT00142454	Nina Bhardwaj, MD, PhD	Principal Investigator
NCT00142454	Sylvia Adams, MD	Study Director
NCT00142506	Michael J Zelefsky, M.D.	Principal Investigator
NCT00142584	Betty S Riggs, MD, MBA	Study Director
NCT00142753	Stephen Obaro, MBBS, PhD	Study Chair
NCT00142818	Kyle M. Kampman, M.D.	Principal Investigator
NCT00142870	David M Penetar	Principal Investigator
NCT00142896	Eric C. Strain, MD	Principal Investigator
NCT00142909	Rajita Sinha	Principal Investigator
NCT00142948	Thomas R. Kosten, MD	Principal Investigator
NCT00142961	Frances R Levin, M.D.	Principal Investigator
NCT00143065	John C. Byrd, M.D.	Principal Investigator
NCT00143559	Gregory Hale, M.D.	Principal Investigator
NCT00143741	Pradeep Kadambi, MD	Principal Investigator
NCT00143819	Melissa Magliocco, MD	Principal Investigator
NCT00144014	Michael Hill	Principal Investigator
NCT00144313	Laura L Hammitt, MD	Principal Investigator
NCT00144365	Alex Coutinho, MBChB, MSc	Principal Investigator
NCT00144365	Heiner Grosskurth, MD, PhD	Principal Investigator
NCT00144365	Rebecca Bunnell, ScD, MEd	Principal Investigator
NCT00144365	Shabbar Jaffar, PhD	Principal Investigator
NCT00144417	John L Johnson, MD	Principal Investigator
NCT00144417	Richard E Chaisson, MD	Study Chair
NCT00144417	Susan E Dorman, MD	Principal Investigator
NCT00144690	Santiago Arroyo, M.D., Ph.D.	Study Director
NCT00145041	Agop Bedikian, MD	Principal Investigator
NCT00145210	Betty S. Riggs, MD, MBA	Study Director
NCT00146003	Melissa Magliocco, MD	Principal Investigator
NCT00146185	Eliot Krane, MD	Principal Investigator
NCT00146211	Blair Leavitt, MD	Principal Investigator
NCT00146211	Christopher Ross, MD, PhD	Principal Investigator
NCT00146211	Ira Shoulson, MD	Principal Investigator
NCT00146523	Katherine Beebe, PhD	Study Director
NCT00147225	Saroj Vadhan-Raj, MD	Principal Investigator
NCT00147329	Alan Mentor, MD	Principal Investigator
NCT00147329	Gerald Krueger	Principal Investigator
NCT00147966	Arthur Kavanaugh, MD	Principal Investigator
NCT00148109	Rashmi Chugh, M.D.	Principal Investigator
NCT00148317	Ruben Niesvizky, MD	Principal Investigator
NCT00148382	Lawrence Galitz	Principal Investigator
NCT00148759	Igho Ofotokun, MD, MSc	Principal Investigator
NCT00148772	Daniel Shevrin, MD	Principal Investigator
NCT00148785	Igho Ofotokun, MD, MSc	Principal Investigator
NCT00149630	Thomas R. Kosten, MD	Principal Investigator
NCT00149799	Katharine Phillips, MD	Principal Investigator
NCT00149799	Sabine Wilhelm, PhD	Principal Investigator
NCT00149838	Mark S. George, MD	Principal Investigator
NCT00150462	Mai Le, MD	Study Director
NCT00151541	Steven Garrett, MS, DDS, FACS	Study Director
NCT00151892	Professor Geert D'Haens	Principal Investigator
NCT00151892	William J Sandborn, MD	Principal Investigator
NCT00152113	Wing Leung, M.D.	Principal Investigator
NCT00152451	Barbara Bennett, PhD	Study Director
NCT00152503	Barbara Bennett, PhD	Study Director
NCT00152542	Michael D Schreiber, M.D.	Principal Investigator
NCT00153179	Mark Creager, M.D.	Principal Investigator
NCT00153790	Conrad Earnest, PhD	Principal Investigator
NCT00153803	James R Rigas, MD	Study Chair
NCT00154063	Julia Young, M.D., Ph.D.	Study Director
NCT00156013	Chadi Nabhan, MD	Principal Investigator
NCT00156247	Melissa A. Magliocco, MD	Principal Investigator
NCT00156403	David C Whitcomb, MD, PhD	Study Director
NCT00156520	Peter L Bailey, MD`	Principal Investigator
NCT00156533	Michael L Perlis, Ph.D.	Principal Investigator
NCT00156689	Gary W. Duncan, M.D.	Principal Investigator
NCT00157703	Axel Mescheder, M.D.	Study Director
NCT00158158	Dorothy Hatsukami, Ph.D.	Principal Investigator
NCT00158210	Steve Shoptaw, PhD	Principal Investigator
NCT00158249	Scott E. Lukas, PhD	Principal Investigator
NCT00159432	Syma Iqbal, M.D.	Principal Investigator
NCT00160121	Julio Casoy, MD	Study Director
NCT00160303	Alexios G Carayannopoulos, DO, MPH	Study Director
NCT00160303	Joanne P Borg-Stein, MD	Principal Investigator
NCT00160355	Kimberly Kasow, DO	Principal Investigator
NCT00161213	Elizabeth A. Poplin, MD	Principal Investigator
NCT00161291	Andres Forero-Torres, MD	Principal Investigator
NCT00161421	William J Bremner, MD, PhD	Principal Investigator
NCT00162032	Qi Zhu, MD,	Study Director
NCT00162045	Qi Zhu, MD	Study Director
NCT00162331	Qi Zhu, MD	Study Director
NCT00162734	Ralph T. Doyle	Study Director
NCT00163488	Mark A. Wingertzahn, Ph.D.	Study Chair
NCT00164359	Rachel N Bronzan, MD, MPH	Principal Investigator
NCT00164424	David Lewis, MD	Principal Investigator
NCT00164424	Gabriela Paz Bailey, MD	Principal Investigator
NCT00164710	Rachel N Bronzan, MD, MPH	Principal Investigator
NCT00165295	Steven P. Treon, MD, MA, PhD	Principal Investigator
NCT00165334	Pasi A Janne, MD, PhD	Principal Investigator
NCT00165477	Patrick Y. Wen, MD	Principal Investigator
NCT00165568	David Ryan, MD	Principal Investigator
NCT00165789	Santiago Arroyo, M.D., Ph.D	Study Director
NCT00165802	Jenny Zhang	Study Director
NCT00166413	Angela Dispenzieri, M.D.	Principal Investigator
NCT00166439	Patrick B. Johnston, M.D., Ph.D.	Principal Investigator
NCT00166452	Keith A Bengtson, M.D.	Principal Investigator
NCT00166556	Russell H. Wiesner, M.D.	Principal Investigator
NCT00167310	Jeffrey K Yao, Ph.D., FACB	Principal Investigator
NCT00167544	Nehal A. Parikh, D.O., M.S.	Principal Investigator
NCT00167648	R. Bruce Montgomery, MD	Principal Investigator
NCT00167687	Andrew Saxon, MD	Principal Investigator
NCT00167687	Charles Meredith, MD	Principal Investigator
NCT00167687	Tracy Simpson, PhD	Principal Investigator
NCT00168064	Stuart Lessin, M.D.	Study Director
NCT00170053	Thomas A. Gonwa, M.D.	Principal Investigator
NCT00170157	Eugene D. Kwon, M.D.	Principal Investigator
NCT00170456	Timothy Mant, MD	Principal Investigator
NCT00170469	Lawrence Currie, MD	Principal Investigator
NCT00174499	Elisabeth A Kruse, PhD	Study Director
NCT00174538	Stacy S. Shord, PharmD	Principal Investigator
NCT00174980	M. R Bullock, M.D.	Principal Investigator
NCT00176306	Richard S Morehead, MD	Principal Investigator
NCT00176605	Mark Stein, MD	Principal Investigator
NCT00176748	Francis Worden, M.D.	Principal Investigator
NCT00177307	Nathan Bahary, MD	Principal Investigator
NCT00177333	M Reeves, MD	Principal Investigator
NCT00177372	Mitchell D Creinin, MD	Principal Investigator
NCT00177398	Mary T Korytkowski, MD	Principal Investigator
NCT00177710	Shahid Husain, MD	Principal Investigator
NCT00178269	Yuhchyau Chen, MD, Ph.D	Principal Investigator
NCT00178464	Norma B. Lerner, MD	Principal Investigator
NCT00178490	Marc B. Lande, MD	Principal Investigator
NCT00178503	Deborah A. Pearson, PhD	Principal Investigator
NCT00178841	John A Zic, MD	Principal Investigator
NCT00179179	Alp Ikizler, MD	Principal Investigator
NCT00179218	Alp Ikizler, MD	Principal Investigator
NCT00179309	James L Gulley, M.D., Ph.D.	Principal Investigator
NCT00179621	Jay Backstrom, MD	Study Director
NCT00179647	Robert Knight, MD	Study Director
NCT00179673	Robert Knight, MD	Study Director
NCT00179959	Amy Paller, MD	Principal Investigator
NCT00180011	Emily DiMango, MD	Principal Investigator
NCT00181116	Eric H Kossoff, MD	Principal Investigator
NCT00181623	Corrine K Welt, MD	Principal Investigator
NCT00181844	Janet Wozniak, MD	Principal Investigator
NCT00181870	Janet Wozniak, MD	Principal Investigator
NCT00181883	Janet Wozniak, MD	Principal Investigator
NCT00182689	Barbara Gitlitz	Principal Investigator
NCT00182702	Edwin Posadas	Principal Investigator
NCT00182754	Aminah Jatoi, MD	Study Chair
NCT00182767	Ellen Chuang	Principal Investigator
NCT00182793	George Somlo, MD	Principal Investigator
NCT00182845	Malaz Boustani, MD, MPH	Principal Investigator
NCT00183092	Bruce L. Miller, MD	Principal Investigator
NCT00183092	Michael Geschwind, MD, PhD	Principal Investigator
NCT00183222	Raymond F Anton, MD	Principal Investigator
NCT00183235	Raymond F. Anton, MD	Principal Investigator
NCT00183261	Douglas D. Richman, MD	Study Chair
NCT00183261	Susan Little, MD	Study Chair
NCT00183339	Linmarie Sikich, MD	Study Chair
NCT00183443	Trisha Suppes, MD, PhD	Principal Investigator
NCT00183729	Eric J. Lenze, MD	Principal Investigator
NCT00183937	David Quinn, MD	Principal Investigator
NCT00185562	Mark C Genovese, MD	Principal Investigator
NCT00186017	Terence Arthur Ketter	Principal Investigator
NCT00186043	Terence Ketter, MD	Principal Investigator
NCT00186628	David Miklos	Principal Investigator
NCT00187148	Pat Flynn, MD	Principal Investigator
NCT00187941	Herwig-Ulf Meier-Kriesche, MD	Principal Investigator
NCT00188617	Thomas Waddell, MD FRCSC	Principal Investigator
NCT00189150	Jeong M Park, MS, PharmD	Principal Investigator
NCT00189514	Lisa Porter, MD	Study Director
NCT00190918	David Miller, MD	Study Chair
NCT00190983	David Miller, MD	Study Chair
NCT00193180	Denise A. Yardley, MD	Principal Investigator
NCT00193206	Denise A. Yardley, MD	Principal Investigator
NCT00193219	David R. Spigel, MD	Principal Investigator
NCT00193414	David R. Spigel, MD	Principal Investigator
NCT00193453	David R. Spigel, MD	Principal Investigator
NCT00193492	John D Hainsworth, MD	Principal Investigator
NCT00193648	Debbie Gipson, MD	Principal Investigator
NCT00193648	Howard Trachtman, MD	Principal Investigator
NCT00193648	Tom Greene, PhD	Principal Investigator
NCT00194649	John Amory	Principal Investigator
NCT00194675	Alvin M Matsumoto, MD	Principal Investigator
NCT00195637	William A Gahl, M.D.	Principal Investigator
NCT00195728	Rita Jain, MD	Study Director
NCT00198055	Kimberly A. Stigler, MD	Principal Investigator
NCT00198107	Christopher J. McDougle, MD	Principal Investigator
NCT00198133	Patrick Loehrer, M.D.	Principal Investigator
NCT00198198	Amit Anand, MD	Principal Investigator
NCT00198289	Seth Hetherington, M.D.	Study Director
NCT00198471	Jon Williams, PhD	Study Director
NCT00198523	Tim McNamara, PharmD	Study Director
NCT00198536	Tim McNamara, PharmD	Study Director
NCT00199433	Neil Sussman, MD	Study Director
NCT00199446	James Williams, MD	Study Director
NCT00199888	Chaitanya R Divgi, MD	Principal Investigator
NCT00199888	Pual Russo, MD	Principal Investigator
NCT00201123	William Rom, MD, MPH	Principal Investigator
NCT00201864	Ewa Mrozek, MD	Principal Investigator
NCT00202696	Philip Jochelson, MD	Study Director
NCT00203320	Edward L. Tobinick, M.D.	Principal Investigator
NCT00203372	Fairooz Kabbinavar, MD	Study Chair
NCT00203424	Fairooz Kabbinavar, MD	Study Chair
NCT00203476	Raela B Williford, PharmD	Principal Investigator
NCT00203502	Issam Makhoul, MD	Principal Investigator
NCT00203567	Lori L Davis, MD	Principal Investigator
NCT00203957	Arif Dalvi, M.D.	Principal Investigator
NCT00204776	Sherry Morgan-Meadows	Principal Investigator
NCT00205179	Carey E Gleason, PhD	Principal Investigator
NCT00205426	Robert Love, MD	Principal Investigator
NCT00205660	John W. Newcomer, MD	Principal Investigator
NCT00205946	Diego A Pizzagalli, PhD	Principal Investigator
NCT00206076	David J Reich, MD	Principal Investigator
NCT00206388	Peter Zage, MD	Principal Investigator
NCT00207311	Stephen A Harrison, MD	Principal Investigator
NCT00207402	Shane Mills, MD	Principal Investigator
NCT00207402	Stephen A Harrison, MD	Principal Investigator
NCT00208026	Albert C Yan, MD	Principal Investigator
NCT00208156	Katherine Beebe, PhD	Study Director
NCT00208169	Pirzada S. Sattar, M.D.	Principal Investigator
NCT00208767	Arshed Quyyumi, MD	Principal Investigator
NCT00208793	Roberd M Bostick, MD, MPH	Principal Investigator
NCT00209092	Amelia Zelnak, MD	Principal Investigator
NCT00209313	Francois-Xavier Mbopi-Keou, M.Sc, PhD	Principal Investigator
NCT00210470	Jeffrey S. Moyer, MD	Principal Investigator
NCT00211250	Cosme O Lozano, M.D.	Principal Investigator
NCT00211276	Myron Czuczman, MD	Principal Investigator
NCT00211393	K. Bailey Freund, MD	Principal Investigator
NCT00211432	Lawrence Yannuzzi, MD	Principal Investigator
NCT00211458	Jason S Slakter, MD	Principal Investigator
NCT00211692	Samuel B. Ho, M.D.	Principal Investigator
NCT00211887	Fred Lublin, MD	Principal Investigator
NCT00211900	Matt Hohenboken, MD, PhD	Study Director
NCT00211939	Wajeh Y Qunibi, M.D.	Study Chair
NCT00211978	Wajeh Y Qunibi, M.D.	Study Chair
NCT00211991	Matt Hohenboken, MD, PhD	Study Director
NCT00212316	Karl Kieburtz, MD, MPH	Principal Investigator
NCT00212316	Steven M. Hersch, MD, PhD	Principal Investigator
NCT00212641	Joseph G Bisaha, Ph.D.	Study Director
NCT00212758	Amira Y Al-Uzri, M.D.	Principal Investigator
NCT00213135	Steven J. Greenberg, M.D.	Study Director
NCT00213148	Donald R Tredway, M.D., PhD	Study Director
NCT00213993	Paul R Hutson, PharmD	Principal Investigator
NCT00214266	Hans Sollinger, MD	Principal Investigator
NCT00214461	Richard Greenberg, MD	Principal Investigator
NCT00214461	Thomas P Marbury, MD	Principal Investigator
NCT00214500	Karin Ludwig, M.D.	Study Director
NCT00214617	Anh Le, PhD	Principal Investigator
NCT00214786	Marlon Levy, MD	Principal Investigator
NCT00214890	Richard H Haubrich, MD	Study Chair
NCT00215228	Wei Zhang, M.D., Ph. D	Principal Investigator
NCT00216099	Christopher Sweeney, M.B.B.S.	Study Chair
NCT00216203	Nasser Hanna, M.D.	Study Chair
NCT00216294	Anantha Shekhar, MD, PhD	Principal Investigator
NCT00216879	T A Luger, Dr. med.	Principal Investigator
NCT00217048	Adil E Bharucha, MBBS, M.D.	Principal Investigator
NCT00217165	Beth L Murphy, MD, PhD	Principal Investigator
NCT00217373	William Carson	Principal Investigator
NCT00217399	Claudine Isaacs	Principal Investigator
NCT00217412	Maryam Fouladi	Principal Investigator
NCT00217425	Kristen N. Ganjoo, MD	Study Chair
NCT00217438	William Bensinger	Principal Investigator
NCT00217503	Richard F. Little, MD	Principal Investigator
NCT00217516	Michael R. Kuettel, MD, PhD	Principal Investigator
NCT00217542	Mario Sznol	Principal Investigator
NCT00217568	Leona A. Holmberg, MD, PhD	Principal Investigator
NCT00217620	George D. Demetri, MD	Study Chair
NCT00217620	Margaret von Mehren, MD	Study Chair
NCT00217646	Jorge Cortes	Principal Investigator
NCT00217672	Sara Hurvitz, MD	Principal Investigator
NCT00217971	Frances R Levin, MD	Principal Investigator
NCT00218062	Joy M. Schmitz, PhD	Principal Investigator
NCT00218283	Dorothy Hatsukami, PhD	Principal Investigator
NCT00218296	Dorothy Hatsukami, PhD	Principal Investigator
NCT00218426	George Woody, MD	Principal Investigator
NCT00218465	Eden Evins, M.D., M.P.H.	Principal Investigator
NCT00218465	Maurizio Fava, M.D.	Principal Investigator
NCT00218491	Robert Malcolm, M.D.	Principal Investigator
NCT00218517	Brent A Moore, Ph.D.	Principal Investigator
NCT00219349	Franklin R. Schneier, M.D.	Principal Investigator
NCT00219349	Kenneth D Belzer, Ph.D.	Principal Investigator
NCT00219817	William Polvino, MD	Study Director
NCT00219843	Eric Wachter, Ph.D.	Study Director
NCT00219882	Chris Goss, MD, MSc	Principal Investigator
NCT00220584	Allan L Reiss	Principal Investigator
NCT00220636	David J. Hellerstein, MD	Principal Investigator
NCT00220857	Robert S Fisher, MD	Principal Investigator
NCT00221299	Nancy E Lane, MD	Principal Investigator
NCT00221325	James L. Rubenstein, MD PhD	Study Chair
NCT00221338	Jacqueline M Leung, MD, MPH	Principal Investigator
NCT00221416	Robert A Kowatch, MD	Principal Investigator
NCT00221442	Susan L McElroy, MD	Principal Investigator
NCT00221962	Robert L Findling, MD	Principal Investigator
NCT00222170	Jerzy Sarosiek, PhD	Principal Investigator
NCT00222170	Mojtaba S. Olyaee, MD	Principal Investigator
NCT00222469	Mehrdad Jafari, MD, PhD	Principal Investigator
NCT00222729	Julie Bauman, MD	Principal Investigator
NCT00222872	Mara J. Horwitz, M.D.	Principal Investigator
NCT00223210	Sherwood Brown, MD, PhD	Principal Investigator
NCT00223223	E. Sherwood Brown, M.D., Ph.D.	Principal Investigator
NCT00223236	E. Sherwood Brown, PH.D., M.D.	Principal Investigator
NCT00223275	Edson S Brown, MD, PhD	Principal Investigator
NCT00223509	Charles L Bowden, MD	Principal Investigator
NCT00223509	Vivek - Singh, MD	Principal Investigator
NCT00223626	Bankole A. Johnson, DSc,MD.PhD	Principal Investigator
NCT00223639	Bankole A Johnson, DSc,MD,PhD	Principal Investigator
NCT00223704	Mias Pretorius, MBChB	Principal Investigator
NCT00223951	Jack V Greiner, OD, DO, PhD	Principal Investigator
NCT00223990	Bernhards Ogutu, M.D.	Principal Investigator
NCT00224107	Lawrence Hill, PharmD, RPh	Study Director
NCT00224120	Lawrence Hill, PharmD, RPh	Study Director
NCT00224133	Lawrence Hill, Pharm D, RPh	Study Director
NCT00224289	Bruce Shields, MD	Principal Investigator
NCT00224445	John Flaherty	Study Director
NCT00224770	Daniel F. Hanley, MD	Study Chair
NCT00224770	Mario Zuccarello, MD	Principal Investigator
NCT00224770	Paul Vespa, MD	Principal Investigator
NCT00224874	Mary Horowitz, MD	Study Director
NCT00225017	James H Stein, MD	Study Chair
NCT00225017	Robert L Murphy, MD	Study Chair
NCT00225095	Michelle Williams, Ph.D.	Study Director
NCT00225147	Anurag Relan, MD	Study Director
NCT00225420	Young Whang, MD, PhD	Principal Investigator
NCT00225433	Kurt T Barnhart, MD, MSCE	Principal Investigator
NCT00225615	Alex Dorenbaum, MD	Study Chair
NCT00225784	J Marc Pipas, MD	Principal Investigator
NCT00226005	Tomislav Dragovich, MD, PhD	Principal Investigator
NCT00226057	Eric L Simpson, MD	Principal Investigator
NCT00226239	Julie Bauman, MD	Principal Investigator
NCT00226655	William Shapiro, MD	Principal Investigator
NCT00226772	Scott Houston	Study Director
NCT00227266	Kathryn J Swoboda, M.D.	Principal Investigator
NCT00227513	George Wilding	Principal Investigator
NCT00227539	Renato Martins, MD, MPH	Principal Investigator
NCT00227565	James R. Jett, MD	Study Chair
NCT00227591	Ayalew Tefferi	Principal Investigator
NCT00227630	Paul Van Schil, MD, PhD	Study Chair
NCT00227760	Srikala Sridhar	Principal Investigator
NCT00228605	Gwendolyn Neibler, DO	Study Director
NCT00229203	Paul Richardson, MD	Study Chair
NCT00229593	Christina Wang, MD	Principal Investigator
NCT00229593	William J Bremner, MD, PhD	Principal Investigator
NCT00229619	Sabrina Martyr, MD	Principal Investigator
NCT00229632	Kenneth H Fischbeck, M.D.	Principal Investigator
NCT00230126	Miguel Villalona, M.D.	Principal Investigator
NCT00230542	Ursula Matulonis, MD	Principal Investigator
NCT00230568	James Prodafikas	Study Director
NCT00231218	michael l macknin, m.d.	Study Director
NCT00231335	Dragan Bugarski-Kirola, MD	Principal Investigator
NCT00232414	Melissa DelBello, MD	Principal Investigator
NCT00232479	Judith Hurley	Principal Investigator
NCT00232635	Stephen MacKinnon	Principal Investigator
NCT00232726	Svein Dueland, MD, Ph.D	Principal Investigator
NCT00232947	Nancy Bouveret, MD	Study Director
NCT00233064	Genny Losonsky, MD	Study Director
NCT00233155	Jeffrey Tobias, MD	Study Director
NCT00233402	H Barton Grossman	Principal Investigator
NCT00233480	Tamara B Horwich, MD	Principal Investigator
NCT00233519	Richard T. Moxley, III, M.D.	Principal Investigator
NCT00233935	Charles Lightdale	Principal Investigator
NCT00233961	Gwen L. Nichols, MD	Study Chair
NCT00234039	Eila C. Skinner, MD	Study Chair
NCT00234091	Kiat Ruxrungtham, MD, MPH	Study Chair
NCT00234091	Saphonn Vonthanak, MD, PhD	Study Chair
NCT00234195	Rajnish Mago, MD	Principal Investigator
NCT00234494	Christopher Sweeney, M.B.B.S.	Study Chair
NCT00234663	John P Clancy, MD	Principal Investigator
NCT00234702	Dr. William F Finn	Principal Investigator
NCT00235274	Anantha Shekhar, MD, PhD	Principal Investigator
NCT00235625	Joel M Gelfand, MD/MSCE	Principal Investigator
NCT00235716	Maurice Dysken	Study Chair
NCT00235729	Charles W. Gorodetzky	Study Chair
NCT00236080	Gwendolyn Neibler, DO	Study Director
NCT00236093	John Messina	Study Director
NCT00236184	Yufang Lu, MD, PhD	Study Director
NCT00236197	Yufang Lu	Study Director
NCT00237354	Chris Wynne, M.D.	Principal Investigator
NCT00237354	Eric Wachter, Ph.D.	Study Director
NCT00237640	Steve M Blevins, M.D.	Principal Investigator
NCT00237666	Michael R Liebowitz, MD	Principal Investigator
NCT00237718	Alp Ikizler, MD	Principal Investigator
NCT00237718	Jonathan Himmelfarb, MD	Principal Investigator
NCT00238108	Frank AJ Scheer, PhD	Principal Investigator
NCT00238121	Gini Fleming	Principal Investigator
NCT00238212	Anthony El-Khoueiry	Principal Investigator
NCT00238303	Evanthia Galanis	Principal Investigator
NCT00238394	Steven Alberts	Principal Investigator
NCT00238420	M. Dror Michaelson	Principal Investigator
NCT00239135	Lawrence Anderson, MD, F.A.C.P	Principal Investigator
NCT00239148	Aleksandra Pastrak, M.D.	Study Director
NCT00239187	Aleksandra Pastrak, M.D.	Study Director
NCT00239551	Qiang Cai, MD, PhD	Principal Investigator
NCT00239551	Vincent W Yang, MD, PhD	Study Director
NCT00239564	James W. Tetrud, MD	Principal Investigator
NCT00239642	David Bregman, M.D., Ph.D.	Study Director
NCT00239915	Jon F. Heiser, M.D.	Principal Investigator
NCT00239993	MerriKay Oleen-Burkey, Ph.D	Study Director
NCT00240071	Carla Falkson, MD	Principal Investigator
NCT00240097	Francisco Robert, MD	Principal Investigator
NCT00240110	Ihsan M Salloum, MD, MPH	Principal Investigator
NCT00240253	Lisa Porter, MD	Study Director
NCT00240981	Shalender Bhasin, MD	Principal Investigator
NCT00240981	Shehzad Basaria, MD	Study Director
NCT00240981	Wildon Farwell, MD, MPH	Principal Investigator
NCT00240994	William Harmon, MD	Study Chair
NCT00241176	Barbara J Coffey, M.D, M.S.	Principal Investigator
NCT00241319	Ingerman Avner, MD	Study Director
NCT00241423	James Malone, MD	Study Director
NCT00241839	Mark S. Segal, MD, PhD	Principal Investigator
NCT00242164	Panduranga S Rao, MD, DNB, MS	Principal Investigator
NCT00242281	Susan P Clausen, PhD	Study Director
NCT00242385	Jeff Garrett, MD	Principal Investigator
NCT00242424	Janet A Englund, MD	Study Chair
NCT00242502	Ahmed Kaseb, M.D.	Principal Investigator
NCT00243061	Elaine McWhirter	Principal Investigator
NCT00243074	Linda Garland	Principal Investigator
NCT00243100	Gauri Varadhachary	Principal Investigator
NCT00243191	Scott Schuetze, MD, PhD	Principal Investigator
NCT00243243	Myung S Park, MD	Principal Investigator
NCT00243386	Peter Collins, MD	Principal Investigator
NCT00243412	William Reiss, Pharm.D.	Study Director
NCT00243542	Steven Garrett, MS, DDS	Study Director
NCT00243711	Mark Curtis, O.D.	Principal Investigator
NCT00243789	Diana Escolar, MD	Study Chair
NCT00243854	Gabriela Chiorean, M.D.	Principal Investigator
NCT00243854	Higinia Cardenes, M.D., PhD	Principal Investigator
NCT00243867	Robert Bellet, MD	Study Director
NCT00243880	Ji Chong, MD	Principal Investigator
NCT00243880	Mitchell Elkind, MD, MS	Principal Investigator
NCT00243932	Hiroshi Mitsumoto	Principal Investigator
NCT00243932	J. L. P. Thompson, Ph.D.	Principal Investigator
NCT00243932	Petra Kaufmann, MD	Principal Investigator
NCT00244244	Jeremy Shefner, MD	Principal Investigator
NCT00244244	Merit Cudkowicz, MD	Principal Investigator
NCT00244309	Jay P Ciezki, MD	Principal Investigator
NCT00244361	Michael R Pranzatelli, M.D.	Principal Investigator
NCT00244543	Ingerman Avner, MD	Study Director
NCT00244569	Mitchell L. Shiffman, MD	Principal Investigator
NCT00244816	Agop Bedikian, MD	Study Director
NCT00244881	Harold Burstein	Principal Investigator
NCT00244985	Myron S. Czuczman, MD	Principal Investigator
NCT00244998	Donald L. Trump, MD	Principal Investigator
NCT00245024	Patricia Thompson, PhD	Study Chair
NCT00245037	Richard Maziarz, MD	Study Chair
NCT00245063	Marianna Koczywas	Principal Investigator
NCT00245102	Robert Maki	Principal Investigator
NCT00245206	Dilip V. Jeste, MD	Principal Investigator
NCT00245245	Josef N Mueksch, MD, MBA	Principal Investigator
NCT00245336	Fred Weaver, MD	Principal Investigator
NCT00245336	Kenneth Renkens, MD	Principal Investigator
NCT00245336	Thomas C Reynolds, MD, PhD	Study Director
NCT00245336	William Chapman, MD	Principal Investigator
NCT00245518	Shehzad Basaria, M.D.	Principal Investigator
NCT00245622	Edward J Fox, M.D., Ph.D.	Study Chair
NCT00245622	Jaye Thompson, Ph.D.	Study Director
NCT00246090	Dale Shuster, Ph.D.	Study Director
NCT00246363	Henry Sacks, Ph.D., MD	Principal Investigator
NCT00246467	Eric Sheldon, MD	Principal Investigator
NCT00246519	Julie A Johnson, PharmD	Principal Investigator
NCT00246532	Lawrence F Chu, MD, MS	Principal Investigator
NCT00246662	Glenn Michelson, MD	Study Director
NCT00246753	Young Whang, MD, PhD	Principal Investigator
NCT00246909	Hartmut Heinze, PhD	Study Chair
NCT00247078	Richard C Dart, MD PhD	Principal Investigator
NCT00247078	Walter Garcia, MD	Study Director
NCT00247273	Sal Bartelmo, MD	Study Director
NCT00247416	John Rinehart	Principal Investigator
NCT00247572	Donald Jasinski, MD	Principal Investigator
NCT00248092	Donald R. Jasinski, MD	Principal Investigator
NCT00248248	Jeffrey F Hines, MD, FACOG	Principal Investigator
NCT00248534	Lauren E. Abrey, MD	Study Chair
NCT00248560	Ammar Sukari, M.D.	Principal Investigator
NCT00248638	Thomas R Ziegler, MD	Principal Investigator
NCT00248651	Bincy P Abraham, M.D., M.S.	Principal Investigator
NCT00248651	Brian E. Lacy, M.D., Ph.D.	Principal Investigator
NCT00248651	Charlene M Prather, M.D.	Principal Investigator
NCT00248651	Colin P Howden, M.D.	Principal Investigator
NCT00248651	Earnest P Bouras, M.D.	Principal Investigator
NCT00248651	G. R. Locke, III, M.D.	Principal Investigator
NCT00248651	Hashem El-Serag, M.D.	Principal Investigator
NCT00248651	John K. DiBaise, M.D.	Principal Investigator
NCT00248651	Nicholas J Talley, M.D.,Ph.D.	Study Chair
NCT00248651	Paul Moayyedi, M.D.	Principal Investigator
NCT00248833	Barnett Gibbs, MD	Principal Investigator
NCT00249262	Agop Bedikian, MD	Study Director
NCT00249405	Robert M. Anthenelli, MD	Principal Investigator
NCT00249444	Herbert Kleber, MD	Principal Investigator
NCT00249782	Steven Garrett, MS, DDS	Study Director
NCT00249938	Sunny Linnebur, Pharm.D.	Principal Investigator
NCT00250172	Masahiro Fujita, M.D.	Principal Investigator
NCT00250341	Michelle Zeidler, MD	Principal Investigator
NCT00250614	Lisa ARVANITIS, MD	Study Director
NCT00250822	Yehuda Patt, MD	Principal Investigator
NCT00250926	Steven P. Treon, MD, MA, PhD	Principal Investigator
NCT00250978	Christopher G. Azzoli, M.D.	Principal Investigator
NCT00251225	Leonard J Appleman, MD	Principal Investigator
NCT00251303	Susan E Swedo, MD	Principal Investigator
NCT00251316	Monica C Skarulis, M.D.	Principal Investigator
NCT00251446	Marcos Joppert, MD	Principal Investigator
NCT00251459	Tsontcho Ianchulev, M.D.	Study Director
NCT00251472	Barry Mirtsching, MD	Principal Investigator
NCT00251524	John Waples, MD	Principal Investigator
NCT00251732	Ronnie Fass, MD	Principal Investigator
NCT00252148	David Ho, MD	Principal Investigator
NCT00252148	Michael Keefer, MD	Principal Investigator
NCT00252148	Soe Than, MD	Study Director
NCT00252291	David Pearlman, MD	Principal Investigator
NCT00252382	Glenn Michelson, MD	Study Director
NCT00252564	Allen Cohn, MD	Principal Investigator
NCT00252564	Leonard Saltz, M.D.	Principal Investigator
NCT00253344	Matthew M. Cooney, MD	Study Chair
NCT00253370	Weijing Sun, MD	Study Chair
NCT00253435	Gregory Yanik, MD	Study Chair
NCT00253435	John M. Maris, MD	Principal Investigator
NCT00253435	Katherine K. Matthay, MD	Principal Investigator
NCT00253474	Brigitte C. Widemann, MD	Principal Investigator
NCT00253513	Eneida Nemecek, MD	Principal Investigator
NCT00253578	Mohamad Hussein	Principal Investigator
NCT00253591	Matthew Hatton, MD	Study Chair
NCT00253630	Leslie Popplewell	Principal Investigator
NCT00253747	Eugene Somoza, M.D., Ph.D.	Principal Investigator
NCT00253747	Theresa Winhusen, Ph.D.	Principal Investigator
NCT00253890	Michael D Stein, MD	Principal Investigator
NCT00253890	Rogers Griffith, MD	Study Director
NCT00254254	Lisa Porter, MD	Study Director
NCT00254397	Patrick Hwu, MD	Principal Investigator
NCT00254449	Jeffrey Tobias, MD	Study Director
NCT00254449	William R. Kennedy, MD	Principal Investigator
NCT00254462	Christopher J. Kratochvil, MD	Principal Investigator
NCT00254488	Robert Young, MD	Study Chair
NCT00254800	James Malone, MD	Study Director
NCT00254826	Mark J. Mulligan, MD	Principal Investigator
NCT00255073	Terence Sanger, md,phd	Principal Investigator
NCT00255086	J. Wesson Ashford Jr., MD, PhD	Study Director
NCT00255086	Jerome A Yesavage	Principal Investigator
NCT00255125	Peter Vanveldhuizen, MD	Principal Investigator
NCT00255177	Bruce Bacon, M.D.	Principal Investigator
NCT00255177	George Wu, MD	Principal Investigator
NCT00255177	Pablo Tebas, M.D.	Principal Investigator
NCT00255177	Thomas Marbury, MD	Principal Investigator
NCT00255294	Christine K Mauck, MD	Study Director
NCT00255606	Pirkko Kellokumpu-Lehtinen	Principal Investigator
NCT00255658	Muralidhar Beeram	Principal Investigator
NCT00255749	John A. Glaspy, MD, MPH	Principal Investigator
NCT00255762	Svetomir Markovic	Principal Investigator
NCT00255788	Karen A. Gelmon, MD	Study Chair
NCT00255788	Susan Ellard, MD	Study Chair
NCT00255827	Mary Mulcahy, M.D.	Principal Investigator
NCT00256191	Sandra Silberman, MD	Study Director
NCT00256204	Yoni Weiss, MD	Study Director
NCT00256269	Sai-Hong Ignatius Ou, MD	Principal Investigator
NCT00256334	Randall Holcombe, MD	Principal Investigator
NCT00256451	David Oslin, MD	Principal Investigator
NCT00256542	C. Lowell Parsons, MD	Principal Investigator
NCT00257426	Bert H. O'Neil, MD	Principal Investigator
NCT00257465	David Berd, MD	Principal Investigator
NCT00257608	Donald Strickland, M.D.	Study Director
NCT00257660	Jean-Loic Robin	Study Director
NCT00257673	Stephen Murray, MD, PhD	Study Director
NCT00257712	Michael V. Vitiello, PhD	Principal Investigator
NCT00257712	Suzanne Barsness, RN,MSN,CCRC	Study Director
NCT00257725	Laurence L Greenhill, MD	Principal Investigator
NCT00257933	Joseph J Zorc, MD	Principal Investigator
NCT00258180	David M. Loeb, MD, PhD	Principal Investigator
NCT00258180	Maria Oliva-Hemker, MD	Principal Investigator
NCT00258193	Michael Camilleri, MD	Principal Investigator
NCT00258245	Jeffrey A. Zonder, MD	Study Chair
NCT00258271	Camille Abboud, MD	Principal Investigator
NCT00258323	David J. Adelstein, MD	Study Chair
NCT00258349	Ramona Swaby	Principal Investigator
NCT00258362	Melissa A. Geller, MD	Principal Investigator
NCT00258375	Stephen Chia, MD	Study Chair
NCT00258778	Eithan Galun, MD	Principal Investigator
NCT00259753	Denis O'Shaughnessy, PHD	Study Director
NCT00259805	Kenneth D Laxer, M.D.	Principal Investigator
NCT00260078	Jennifer King, PharmD	Study Chair
NCT00260078	Ram Yogev, MD	Study Chair
NCT00260338	Jens Kastrup, MD DMSc	Principal Investigator
NCT00260481	Walter Ling, M.D.	Principal Investigator
NCT00260533	Murray B Stein, M.D.	Principal Investigator
NCT00260689	Danielle M Townsley, M.D.	Principal Investigator
NCT00261131	Philip E. Gates, MD	Principal Investigator
NCT00261209	Edward Wang, MD	Principal Investigator
NCT00261209	Marie A Badalamente, PhD	Principal Investigator
NCT00261287	Mark A. Wingertzahn, PhD	Study Chair
NCT00261547	Nina Tolkoff-Rubin, M.D.	Principal Investigator
NCT00261599	James Jones, MD, PharmD	Study Director
NCT00262106	Sheena McCormack, MBBS, MSc, FRCP	Principal Investigator
NCT00262145	Michael D Levitt, M.D.	Principal Investigator
NCT00262223	Denise A. Hien, PhD	Principal Investigator
NCT00262522	Daniel E Cohen, MD	Study Director
NCT00262639	Raymond F Anton, MD	Principal Investigator
NCT00262730	Myrna Rosenfeld, MD, PhD	Study Chair
NCT00262743	Jose F Leis, MD	Principal Investigator
NCT00262743	Tait D. Shanafelt, MD	Study Chair
NCT00262821	Paul DiSilvestro	Principal Investigator
NCT00262847	Robert Burger	Principal Investigator
NCT00262860	Jonathan W. Friedberg, MD	Principal Investigator
NCT00262873	Jane L. Liesveld, MD	Study Chair
NCT00263185	Antonella Rastelli, M.D.	Principal Investigator
NCT00263211	Katherine Weilbaecher, M.D.	Principal Investigator
NCT00263562	Charles Macias, MD, MPH	Principal Investigator
NCT00263575	Julian Howell	Study Director
NCT00263796	Evdokia Anagnostou, MD	Principal Investigator
NCT00263822	Antonio Jimeno	Study Chair
NCT00264290	Peter W. Hunt, M.D.	Principal Investigator
NCT00264420	Roger Macklis, MD	Principal Investigator
NCT00264797	Paula Riggs, M.D.	Principal Investigator
NCT00264797	Theresa Winhusen, Ph.D.	Principal Investigator
NCT00264888	Richard Finkel, MD	Principal Investigator
NCT00265265	Louis Cantilena, M.D.	Principal Investigator
NCT00265473	Bernhard J. Hering, M.D.	Principal Investigator
NCT00265655	Joyce O'Shaughnessy, MD	Principal Investigator
NCT00265733	Edith A. Perez, MD	Study Chair
NCT00265876	Malcolm J. Moore, MD	Study Chair
NCT00265876	Sharlene Gill, MD	Study Chair
NCT00266058	Francesca Aweeka, Pharm.D.	Principal Investigator
NCT00266227	Anshu Vashishtha, MD PhD	Study Director
NCT00266279	Damian Laber, M.D.	Principal Investigator
NCT00266318	Henry C. Bodenheimer, M.D.	Principal Investigator
NCT00266461	Shunji Mochida, PhD	Study Director
NCT00266695	Karl Beutner	Study Director
NCT00266786	Lincoln Bynum, MD	Study Chair
NCT00266825	John Colombo, PhD	Principal Investigator
NCT00266825	Susan E Carlson, PhD	Principal Investigator
NCT00266851	David L Hahn, MD, MS	Principal Investigator
NCT00267046	Saroj Vadhan-Raj, M.D.	Principal Investigator
NCT00267059	Alessandra Ferrajoli, MD	Principal Investigator
NCT00267085	Jorge E. Cortes, M.D.	Principal Investigator
NCT00267176	Bradkey Sakran, MD	Principal Investigator
NCT00267293	Ian M Paul, MD	Principal Investigator
NCT00267358	William Polvino, MD	Study Director
NCT00267670	Mary E Rinella, MD	Principal Investigator
NCT00267696	Larry J. Copeland, MD	Principal Investigator
NCT00267930	Greg Beatch, PhD	Study Director
NCT00268307	Jay Traverse, MD	Principal Investigator
NCT00268333	Laurent Mineur, MD	Study Chair
NCT00268346	David J. Adelstein, MD	Study Chair
NCT00268359	James J. Vredenburgh, MD	Study Chair
NCT00268450	Andrew S. Kraft, MD	Study Chair
NCT00268489	Alex A. Adjei, MD, PhD	Study Chair
NCT00268593	Gavin Marx, MD	Study Chair
NCT00268593	Nick Pavlakis, MD	Study Chair
NCT00268827	Marsden K. Rawlings, MD	Principal Investigator
NCT00268853	Gabor Jurida, M.D.	Study Director
NCT00268879	Anthony Lembo	Principal Investigator
NCT00268918	Susana M. Campos, MD	Principal Investigator
NCT00269594	Jon E Grant, JD, MD	Principal Investigator
NCT00269620	Mitchell D Creinin, MD	Principal Investigator
NCT00270205	Benigno Rodriguez, MD	Study Chair
NCT00270218	Spyros A. Kalams, MD	Study Chair
NCT00270218	Stephen De Rosa, MD	Study Chair
NCT00270257	David Metzger, PhD	Study Chair
NCT00270296	Claire Moffat, MD, MPH	Principal Investigator
NCT00270296	Roger Shapiro, MD, MPH	Principal Investigator
NCT00270452	Gregory J Kato, M.D.	Principal Investigator
NCT00270478	John F Tisdale, M.D.	Principal Investigator
NCT00270634	A. Osama Gaber, MD	Study Director
NCT00270634	Arthur Matas, MD	Study Director
NCT00270634	Daniel Abramowicz, MD, PhD	Study Director
NCT00270634	Mark Pescovitz, MD	Study Director
NCT00270634	Philip Belitsky, MD	Study Director
NCT00270699	Anna Durbin, MD	Principal Investigator
NCT00270894	Lee S Schwartzberg, MD, FACP	Study Chair
NCT00270907	Marjorie Green, MD	Principal Investigator
NCT00271024	Andrea C King, PhD	Principal Investigator
NCT00271219	Hendree E. Jones, PhD	Principal Investigator
NCT00271596	Jess G Fiedorowicz, M.D., Ph.D.	Principal Investigator
NCT00271596	John Caviness, M.D.	Principal Investigator
NCT00271596	Kevin Biglan, M.D., M.P.H.	Principal Investigator
NCT00271596	Leigh J Beglinger, Ph.D.	Principal Investigator
NCT00271596	Ricardo Jorge, M.D.	Principal Investigator
NCT00271609	Teri Kreisl, M.D.	Principal Investigator
NCT00272038	Chadi Nabhan, MD	Principal Investigator
NCT00272311	Charles H Hennekens, MD, DrPH	Principal Investigator
NCT00272311	Wendy R Schneider, MSN, CCRC	Study Director
NCT00272337	Charles H Hennekens, MD, DrPH	Principal Investigator
NCT00272337	Wendy R Schneider, MSN, CCRC	Study Director
NCT00272350	Teri N Kreisl, M.D.	Principal Investigator
NCT00272649	Terry Chew, MD	Study Chair
NCT00272805	James E. Udelson, M.D.	Principal Investigator
NCT00273351	Kenneth L. Marek, MD	Principal Investigator
NCT00273429	Jay Mulaney, MD	Principal Investigator
NCT00273429	Sriram Sonty, MD, FACS	Principal Investigator
NCT00273429	William C. Stewart, MD	Study Director
NCT00273442	Douglas G. Day, MD	Principal Investigator
NCT00273442	Elizabeth D. Sharpe, MD	Principal Investigator
NCT00273442	J. Charles Henry, MD	Principal Investigator
NCT00273442	Mark J. Weiss, MD	Principal Investigator
NCT00273442	Sriram Sonty, MD, FACS	Principal Investigator
NCT00273442	William C. Stewart, MD	Study Director
NCT00273455	Elizabeth D. Sharpe, MD	Principal Investigator
NCT00273455	Robert D. Williams, MD	Principal Investigator
NCT00273455	Robert H. Stewart, MD	Principal Investigator
NCT00273455	William C. Stewart, MD	Study Director
NCT00273650	Robert L Hendren, D.O.	Principal Investigator
NCT00273689	Hengameh H Raissy, PharmD	Principal Investigator
NCT00273689	William Kelly, PharmD	Study Director
NCT00273702	Jon E Grant, MD, JD	Principal Investigator
NCT00273884	Steven Allen, MD	Principal Investigator
NCT00273910	Steven A Rosenberg, M.D.	Principal Investigator
NCT00274287	Chadi Nabhan, MD	Principal Investigator
NCT00274326	Daniel Ter-Minassian, MD	Study Chair
NCT00274352	Robert J Pariser, MD	Principal Investigator
NCT00274456	Jose Iglesias, MD	Study Chair
NCT00274820	Mikkael A. Sekeres, MD, MS	Study Chair
NCT00274833	David M. Peereboom, MD	Study Chair
NCT00274846	Jeffrey Miller, MD	Study Chair
NCT00275002	Katherine Warren, MD	Study Chair
NCT00275028	Ursula Matulonis	Principal Investigator
NCT00275041	Timothy Hobday, MD	Study Chair
NCT00275080	Karen Yee	Principal Investigator
NCT00275093	John Sarantopoulos	Principal Investigator
NCT00275275	Rajesh Pahwa, MD	Principal Investigator
NCT00275431	Lance Leopold, MD	Study Director
NCT00275522	Mark D. Stegall, M.D.	Principal Investigator
NCT00275561	Jeffrey A. Alexander, M.D.	Principal Investigator
NCT00275613	John J. Dillon, M.D., M.S.	Principal Investigator
NCT00275704	Sandhya Pruthi, M.D.	Principal Investigator
NCT00276055	Claire Verschraegen, MD	Principal Investigator
NCT00276250	Christian P Larsen, MD, D.Phil	Principal Investigator
NCT00276250	Nicole Turgeon, MD	Principal Investigator
NCT00276250	Sallie C Carpentier, RN, BSN	Study Director
NCT00276250	Thomas C Pearson, MD, D,Phil	Principal Investigator
NCT00276302	George D Demetri, MD, PhD	Principal Investigator
NCT00276406	Adil E. Bharucha, MBBS, MD	Principal Investigator
NCT00276549	Robert Dreicer, MD, FACP	Study Chair
NCT00276575	Herbert I. Hurwitz, MD	Principal Investigator
NCT00276588	Julie Brahmer, MD	Principal Investigator
NCT00276614	Matthew B. Rettig, MD	Study Chair
NCT00276744	Daniel A. Laheru, MD	Study Chair
NCT00276835	Timothy M. Kuzel, MD	Study Chair
NCT00276874	Craig R. Rush, PhD	Principal Investigator
NCT00276874	Joshua A. Lile, PhD	Principal Investigator
NCT00276874	Lon R. Hays, MD	Principal Investigator
NCT00276874	Paul E Glaser, MD, PhD	Principal Investigator
NCT00276965	Lori Altshuler, MD	Principal Investigator
NCT00277355	Merit E. Cudkowicz, MD	Principal Investigator
NCT00277576	Henry LY Chan	Principal Investigator
NCT00277576	I Shyan-Sheen	Principal Investigator
NCT00277576	Man Fung Yuen	Principal Investigator
NCT00277576	Nancy Leung	Principal Investigator
NCT00277576	Satawat Thongsawat	Principal Investigator
NCT00277576	Seng Gee Lim	Principal Investigator
NCT00277576	Sien-Sing Yang	Principal Investigator
NCT00277576	Tawesak Tandwandee	Principal Investigator
NCT00277576	Wan Cheng Chow	Principal Investigator
NCT00277641	Susan L. McElroy, MD	Principal Investigator
NCT00278161	Lode J. Swinnen, MD	Study Chair
NCT00278174	Ronald M. Bukowski, MD	Study Chair
NCT00278330	Steven Grant	Principal Investigator
NCT00278369	Timothy M. Kuzel, MD	Study Chair
NCT00278382	Meyer Heyman	Principal Investigator
NCT00278395	John Sarantopoulos	Principal Investigator
NCT00278525	Richard Burt, MD	Principal Investigator
NCT00278954	Melvin Berger, MD	Principal Investigator
NCT00278967	Michael Goldstein, M.D.	Principal Investigator
NCT00278993	Asha Das	Study Director
NCT00279162	S Tyring, MD	Principal Investigator
NCT00279305	Carla Greenbaum, MD	Study Chair
NCT00279617	Paul Keck, MD	Principal Investigator
NCT00279708	Joseph R Fontana, M.D.	Principal Investigator
NCT00279890	Mark V. Dahl, M.D.	Principal Investigator
NCT00279903	Andrea J. Boon, M.D.	Principal Investigator
NCT00279916	Laura J. Orvidas, M.D.	Principal Investigator
NCT00280150	Thomas A. Stinchcombe, MD	Principal Investigator
NCT00280150	Thomas Stinchcombe, MD	Principal Investigator
NCT00280293	E. Sherwood Brown, M.D., Ph.D.	Principal Investigator
NCT00280631	Gail Brown, MD	Study Director
NCT00280748	Thomas E. Stinchcombe, MD	Principal Investigator
NCT00280774	Sherwood Brown, Ph.D., M.D.	Principal Investigator
NCT00280826	Robert Nussenblatt, MD, MPH	Principal Investigator
NCT00280917	Michael H Silverman, MD	Study Director
NCT00281541	D. Buell, MD	Study Director
NCT00281606	Eric Daar, MD	Principal Investigator
NCT00281697	Leo Faoro, MD	Study Director
NCT00281840	Panayiotis Savvides, MD	Study Chair
NCT00281866	Michael K. Gibson, MD	Study Chair
NCT00281944	Lia Gore	Principal Investigator
NCT00281957	Kim Margolin	Principal Investigator
NCT00282087	Martee L. Hensley, MD	Principal Investigator
NCT00282282	Vincent Ho, MD	Principal Investigator
NCT00282308	Ariella Kelman, M.D.	Study Director
NCT00282347	Paul Brunetta, MD	Study Director
NCT00282607	Harin Padma-Nathan, MD	Principal Investigator
NCT00282607	James L Yeager, RPh., Ph.D.	Study Director
NCT00282828	Mark H. Pollack, MD	Principal Investigator
NCT00282828	Michael Van Ameringen, MD, FRCPC	Principal Investigator
NCT00282828	Murray B. Stein, MD, MPH	Principal Investigator
NCT00282867	Karen Johnston, MD	Principal Investigator
NCT00283075	Barry H Smith, MD, PhD	Principal Investigator
NCT00283101	Jonathan Drachman, MD	Study Director
NCT00283114	Eric Sievers, M.D.	Study Director
NCT00283244	Thomas E Stinchcombe, MD	Principal Investigator
NCT00283387	Carla G Monico, M.D.	Principal Investigator
NCT00283504	MARIPAZ B MORALES, MD	Principal Investigator
NCT00283595	Anne Klibanski, MD	Principal Investigator
NCT00283686	Arlene Chapman, M.D.	Principal Investigator
NCT00283686	Charity G Moore, MS,PhD	Principal Investigator
NCT00283686	Marva Moxey-Mims, M.D.	Study Director
NCT00283686	Robert Schrier, M.D.	Study Chair
NCT00283686	Ronald Perrone, M.D.	Principal Investigator
NCT00283686	Vicente Torres, M.D.	Principal Investigator
NCT00283712	David Woodley, MD	Principal Investigator
NCT00283712	E. William St. Clair, MD	Study Chair
NCT00283712	Garnett Kelsoe, DSci	Principal Investigator
NCT00283712	Janet Fairley, MD	Principal Investigator
NCT00283712	Russell P. Hall, MD	Study Chair
NCT00283712	Victoria Werth, MD	Principal Investigator
NCT00283790	Phyllis Diener	Study Director
NCT00283816	Kathleen Hoeger, MD	Principal Investigator
NCT00284154	David R. Spigel, MD	Principal Investigator
NCT00284180	Denise A Yardley, MD	Principal Investigator
NCT00284206	Andrew J Saxon	Principal Investigator
NCT00284427	Jeanne Drisko, MD	Principal Investigator
NCT00284505	Anthony H Guarino, MD	Principal Investigator
NCT00284739	Hyo-Chun Yoon, MD, PhD	Principal Investigator
NCT00284752	Tatjana Kolevska, MD	Principal Investigator
NCT00284908	Christof Kreutz, MD	Study Director
NCT00284908	Dennis A Ruff, MD	Principal Investigator
NCT00284908	Patrick Cohen, MD	Study Director
NCT00284986	Joanne Kurtzberg, M.D.	Principal Investigator
NCT00285103	Betrand Coiffier, Prof. MD	Principal Investigator
NCT00285207	Allan T Sawyer, MD	Principal Investigator
NCT00285207	Ana Eduardo, MD	Principal Investigator
NCT00285207	Cynthia J Goldberg, MD	Principal Investigator
NCT00285207	Daron G. Ferris, MD	Principal Investigator
NCT00285207	Douglas G Young, MD	Principal Investigator
NCT00285207	G. Michael Swor, MD	Principal Investigator
NCT00285207	Garn R Mabey, MD	Principal Investigator
NCT00285207	Giuseppe Del Priore, MD	Principal Investigator
NCT00285207	James A Williams, MD	Principal Investigator
NCT00285207	John A Burigo, MD	Principal Investigator
NCT00285207	Jonathan A Cosin, MD	Principal Investigator
NCT00285207	Keith A Aqua, MD	Principal Investigator
NCT00285207	Lance R Bruck, MD	Principal Investigator
NCT00285207	Mark H Einstein, MD	Principal Investigator
NCT00285207	Martin Martino, MD	Principal Investigator
NCT00285207	Michael A Gold, MD	Principal Investigator
NCT00285207	Paul M Fine, MD	Principal Investigator
NCT00285207	Philip E Young, MD	Principal Investigator
NCT00285207	Phyllis Gee, MD	Principal Investigator
NCT00285207	Ramon Cestero, MD	Principal Investigator
NCT00285207	Richard S Guido, MD	Principal Investigator
NCT00285207	Robert Klein, MD	Principal Investigator
NCT00285207	Robert M Spitz, MD	Principal Investigator
NCT00285207	Robert Pfeffer, MD	Principal Investigator
NCT00285207	Steven C Blank, MD	Principal Investigator
NCT00285207	Thomas A deHoop, MD	Principal Investigator
NCT00285207	Vincent A Culotta, Jr, MD	Principal Investigator
NCT00285207	Warner K Huh, MD	Principal Investigator
NCT00285207	William J Mann, MD	Principal Investigator
NCT00285259	Richard T. Kenney, MD	Study Chair
NCT00285298	Robert M Perkins, MD	Study Director
NCT00285376	Carol Reed, M.D.	Study Director
NCT00285415	Dennis R Scribner, JR, MD	Principal Investigator
NCT00285844	Tracey McLaughlin, MD, MS	Study Director
NCT00286143	Arjunan Ganesh, MD	Principal Investigator
NCT00286156	William E. Braun, MD	Principal Investigator
NCT00286182	Mathew S Maurer, MD	Principal Investigator
NCT00286234	William S Harris, PhD	Principal Investigator
NCT00286325	Russell Hall, III, MD	Principal Investigator
NCT00286780	Thomas Kipps, MD, PhD	Principal Investigator
NCT00286793	Lance Leopold, MD	Study Director
NCT00286806	Lance Leopold, MD	Study Director
NCT00286871	Devai Desai, MD, PhD	Principal Investigator
NCT00287053	Corby K. Martin, Ph.D.	Principal Investigator
NCT00287222	Rangaswamy Govindarajan, MD	Principal Investigator
NCT00287248	Danna L Jennings, MD	Principal Investigator
NCT00287339	Nicholas Shaheen, MD, MPH	Principal Investigator
NCT00287352	Karen A Graham, MSc MD	Principal Investigator
NCT00287495	Robert Yarchoan, M.D.	Principal Investigator
NCT00287716	Bill Bradford, MD PhD	Study Director
NCT00287729	Bill Bradford, MD, PhD	Study Director
NCT00287833	Robert Lustig	Principal Investigator
NCT00287911	Linda F. Carson, MD	Study Chair
NCT00287937	Suresh Ramalingam	Principal Investigator
NCT00288028	Muneer H. Abidi, MD	Study Chair
NCT00288041	Gary Croghan	Principal Investigator
NCT00288509	Jean-Loic Robin, MD	Study Director
NCT00288626	Annette Wundes, MD	Study Chair
NCT00288626	George E. Georges, MD	Study Chair
NCT00288626	George H. Kraft, MD	Study Chair
NCT00288626	George J. Hutton, MD	Study Chair
NCT00288626	James D. Bowen, MD	Study Chair
NCT00288626	Michael K. Racke, MD	Study Chair
NCT00288626	Richard A. Nash, MD	Study Chair
NCT00288626	Steven M. Devine, MD	Study Chair
NCT00288626	Uday Popat, MD	Study Chair
NCT00288704	Robert Evans, PharmD.	Study Director
NCT00289016	John Nemunaitis, MD	Principal Investigator
NCT00289016	Rob Coffin, PhD	Study Director
NCT00289029	Marie Morris	Study Director
NCT00289211	Bruce Zuraw, MD	Principal Investigator
NCT00289367	Irwin Klein, MD	Principal Investigator
NCT00289536	Claire Philipp, MD	Principal Investigator
NCT00289536	Deborah Brown, MD	Principal Investigator
NCT00289536	Doris V Quon, MD	Principal Investigator
NCT00289536	Jorge Di Paola, MD	Principal Investigator
NCT00289536	Kapil Saxena, MD	Principal Investigator
NCT00289536	Kimo Stine, MD	Principal Investigator
NCT00289536	Michael Tarantino, MD	Principal Investigator
NCT00289536	Ralph Gruppo, MD	Principal Investigator
NCT00289549	Farhad Ravandi, MD	Principal Investigator
NCT00289614	Kathleen S Bensel, CNMT	Study Director
NCT00290004	Andrew Evens, DO	Principal Investigator
NCT00290004	Neil E Kay, MD	Principal Investigator
NCT00290134	Janne Komi, MD, PhD	Study Director
NCT00290147	Charmagne Beckett, MD	Principal Investigator
NCT00290251	Lynnette K Nieman, MD	Principal Investigator
NCT00290615	Herbert I. Hurwitz, MD	Study Chair
NCT00290680	Andrew S. Kraft, MD	Study Chair
NCT00290732	Vered Stearns, MD	Study Chair
NCT00290810	Tait Shanafelt	Principal Investigator
NCT00291226	Scott W Woods, MD	Principal Investigator
NCT00291707	Julie E Bauman, MD	Principal Investigator
NCT00291772	Rubina Heptulla, MD	Principal Investigator
NCT00292370	Mark B Hamner, MD BS	Principal Investigator
NCT00292396	Martin Kaul, MD	Study Chair
NCT00292422	Evan Beckman, MD	Study Director
NCT00292864	Daniel C. Adelman, MD	Study Director
NCT00293020	David Blum, MD	Study Chair
NCT00293033	Andrew Finn, PharmD	Study Chair
NCT00293215	A/Prof. Andrew M Scott, MBBS MD DDU	Principal Investigator
NCT00293280	Julie Brahmer, MD	Study Chair
NCT00293345	Tanios Bekaii-Saab	Principal Investigator
NCT00293410	Judith E. Karp, MD	Study Chair
NCT00293423	Jennifer Clarke, MD	Study Chair
NCT00293540	Richard R. Love, MD	Principal Investigator
NCT00293579	Anterpreet Neki, M.D.	Principal Investigator
NCT00293631	Michael P. DeMicco, MD	Principal Investigator
NCT00293657	C. Phillip O'Carroll, MD	Principal Investigator
NCT00293657	Craig LaForce, MD	Principal Investigator
NCT00293657	David Kudrow, MD	Principal Investigator
NCT00293657	Fred Sheftell, MD	Principal Investigator
NCT00293657	Gary Berman, MD	Principal Investigator
NCT00293657	Gilbert Podolsky, MD	Principal Investigator
NCT00293657	Gregory Flippo, MD	Principal Investigator
NCT00293657	James Adelman, MD	Principal Investigator
NCT00293657	John Rothrock, MD	Principal Investigator
NCT00293657	Kevin Kahn, MD	Principal Investigator
NCT00293657	Kevin Roberts, MD	Principal Investigator
NCT00293657	Merle Diamond, MD	Principal Investigator
NCT00293657	Mildred Farmer, MD	Principal Investigator
NCT00293657	Ninan Mathew, MD	Principal Investigator
NCT00293657	Paul Winner, DO	Principal Investigator
NCT00293657	Roger Cady, MD	Principal Investigator
NCT00293657	S. David Miller, MD	Principal Investigator
NCT00293657	Sheena Aurora, MD	Principal Investigator
NCT00293657	Stephan Sharp, MD	Principal Investigator
NCT00293657	Stephen Silberstein, MD	Principal Investigator
NCT00293657	Stuart Stark, MD	Principal Investigator
NCT00293657	Timothy Smith, MD	Principal Investigator
NCT00293657	Todd Rozen, MD	Principal Investigator
NCT00293917	M Rico, MD	Study Director
NCT00294125	Sarah L. Morgan, MD, RD	Principal Investigator
NCT00294190	David R. Spigel, MD	Principal Investigator
NCT00294203	Stephen R. Grobmyer, MD	Principal Investigator
NCT00294619	HJ Ji, PhD	Study Chair
NCT00294632	Michael Wang, MD	Principal Investigator
NCT00294671	John L. Berk, MD	Principal Investigator
NCT00294866	Mark R Kaplan, M.D.	Principal Investigator
NCT00294931	David R. Spigel, MD	Principal Investigator
NCT00295061	Kim Hanna, MSc	Study Director
NCT00295178	Bruce Friedman, MD	Principal Investigator
NCT00295308	Kenzie Preston, Ph.D.	Principal Investigator
NCT00295503	Jonathan E Dowell, MD	Principal Investigator
NCT00295685	David A Johnson, MD	Principal Investigator
NCT00295854	Richard E Gammans, MD	Study Director
NCT00295919	Barry J. Maurer, MD, PhD	Study Chair
NCT00295958	Steven A. Rosenberg, MD, PhD	Study Chair
NCT00295971	Morton J. Cowan, MD	Study Chair
NCT00295984	James J. Goedert, MD	Study Chair
NCT00296179	Phyllis Diener	Study Director
NCT00296218	Catherine Domenger, MD	Study Director
NCT00296244	Carlo Gerardo B Ramirez, M.D.	Principal Investigator
NCT00296699	Jonathan W. Stewart, M.D.	Principal Investigator
NCT00296712	Jonathan W. Stewart, MD.	Principal Investigator
NCT00296790	Phyllis Diener	Study Director
NCT00296803	Lisa Lilienthal, M.S.	Study Director
NCT00296816	Phyllis Diener, BS, MT (ASCP)	Study Director
NCT00297037	Christopher Hull, MD	Principal Investigator
NCT00297089	Gary Gordon, MD	Study Director
NCT00297102	P.M. Calverley, Prof.	Principal Investigator
NCT00297115	Fernando J. Martinez, MD, MS	Principal Investigator
NCT00297492	John Hughes, MD	Principal Investigator
NCT00297596	Denise A. Yardley, MD	Principal Investigator
NCT00297830	Elizabeth Shane, M.D.	Principal Investigator
NCT00298038	William Forbes, Pharm D	Study Director
NCT00298168	Stefan Hemmerich, PhD	Study Director
NCT00298233	Tawee Chotpitayasunohdh, MD	Principal Investigator
NCT00298233	Tran Tinh Hien, MD	Principal Investigator
NCT00298363	John Flaherty, PharmD	Study Director
NCT00298545	Peter Holt, MD	Principal Investigator
NCT00298571	Shelly Holmstrom, MD	Study Director
NCT00298610	Shon A Remich, MD	Principal Investigator
NCT00298883	Shiro Fujita, MD	Principal Investigator
NCT00298896	Craig Berman, MD	Study Director
NCT00298974	Rita Jain, M.D.	Study Director
NCT00299000	Celeste Decker, MD	Study Director
NCT00299052	Thomas J Moore, MD	Principal Investigator
NCT00299065	Dana Hilt, MD	Study Director
NCT00299104	Arndt Schottelius, M.D.	Study Director
NCT00299156	Hagop Kantarjian, MD	Principal Investigator
NCT00299182	Saroj Vadhan-Raj, MD	Principal Investigator
NCT00299325	Valérie Pilorget, MD	Study Director
NCT00299507	Patricia Zilliox, Ph.D.	Study Director
NCT00299689	Jason Chesney, MD, PhD	Principal Investigator
NCT00299728	Gregory Mears, MD	Principal Investigator
NCT00299728	Nina Bhardwaj, MD, PhD	Principal Investigator
NCT00299728	Sylvia Adams, MD	Study Director
NCT00299741	Dror Michaelson, MD PhD	Principal Investigator
NCT00299819	Barbara White, M.D.	Study Director
NCT00299988	Norman R Relkin, M.D., Ph.D.	Principal Investigator
NCT00300079	John Liu, PhD	Principal Investigator
NCT00300222	Jeffrey Tobias, MD	Study Director
NCT00300482	Maureen Kelly, MD	Principal Investigator
NCT00300612	Charles J. Link, M.D.	Study Chair
NCT00300612	Ronald C. DeConti, M.D.	Principal Investigator
NCT00300742	Nassima Ait-Daoud, MD	Principal Investigator
NCT00300924	Merle Diamond, M.D.	Study Director
NCT00301028	Merrill S. Kies, MD	Study Chair
NCT00301028	Vassiliki A. Papadimitrakopoulou, MD	Principal Investigator
NCT00301184	Christine Mhorag Hay, MD	Study Chair
NCT00301184	Paul Goepfert, MD	Study Chair
NCT00301210	Eric C. Strain, MD	Principal Investigator
NCT00301366	Kim Hanna, MSc	Study Director
NCT00301418	John A Boockvar, M.D.	Principal Investigator
NCT00301639	Thomas Spencer, MD	Principal Investigator
NCT00301808	Shirish M. Gadgeel, MD	Study Chair
NCT00301821	Ivana Micallef, MD	Study Chair
NCT00301834	Morton J. Cowan, MD	Study Chair
NCT00301847	Walter M. Stadler, MD, FACP	Principal Investigator
NCT00301873	James J. Vredenburgh, MD	Study Chair
NCT00301899	Chia Portera, MD	Study Chair
NCT00301938	Ivana Gojo	Principal Investigator
NCT00301964	Carol Aghajanian	Principal Investigator
NCT00302068	James A. Blumenthal, PhD	Principal Investigator
NCT00302107	Lori L Davis, MD AB	Principal Investigator
NCT00302133	Ihsan M Salloum, MD, MPH	Principal Investigator
NCT00302159	Kevin A Camphausen, M.D.	Principal Investigator
NCT00302224	Sherwin Schwartz, MD	Principal Investigator
NCT00302250	Susan Zieman, MD, PhD	Principal Investigator
NCT00302393	Thomas Spencer, MD	Principal Investigator
NCT00302445	Bernard S Goffe, MD	Principal Investigator
NCT00302445	Leon H Kircik, MD	Principal Investigator
NCT00302458	Thomas Spencer, MD	Principal Investigator
NCT00302731	Jeanne A Drisko, MD	Principal Investigator
NCT00302952	Betty Diamond, MD	Study Chair
NCT00302952	Cynthia Aranow, MD	Study Chair
NCT00303108	Rufus P Collea, MD	Principal Investigator
NCT00303446	Kenneth Fischbeck, M.D.	Principal Investigator
NCT00303667	Sarah Cooley, MD	Principal Investigator
NCT00303758	Jean-Francois Seitz, MD	Study Chair
NCT00303758	Jean-Louis Legoux, MD	Study Chair
NCT00303758	Pascal Hammel, MD, PhD	Study Chair
NCT00303797	Shaji Kumar	Principal Investigator
NCT00303823	Francisco Garcia	Principal Investigator
NCT00303927	Wells Messersmith, MD	Study Chair
NCT00303940	Elizabeth Fox, MD	Principal Investigator
NCT00303940	Holly Meany, MD	Study Chair
NCT00303953	Steven Bernstein	Principal Investigator
NCT00304005	Bonny L. Johnson, RN, MSN	Study Chair
NCT00304083	Brigitte C. Widemann, MD	Principal Investigator
NCT00304096	David R. Brenin, MD, FACS	Principal Investigator
NCT00304278	Krishna Rao, MD, PhD	Principal Investigator
NCT00304278	Thomas Robbins, MD	Principal Investigator
NCT00304434	Mark Holodniy, MD	Principal Investigator
NCT00304460	James C Yang, M.D.	Principal Investigator
NCT00304538	Steven Edelman, MD	Principal Investigator
NCT00304746	Harrison G Pope, M.D.	Principal Investigator
NCT00304746	Stuart N Seidman, M.D.	Principal Investigator
NCT00304811	Daniel M Musher, MD	Principal Investigator
NCT00304954	Robert Nussenblatt, MD, MPH	Principal Investigator
NCT00305110	Andrew K Chang, MD	Principal Investigator
NCT00305227	Ann E Stapleton, MD	Principal Investigator
NCT00305344	Desmond A Schatz, MD	Principal Investigator
NCT00305344	Michael J Haller, MD	Principal Investigator
NCT00305487	Mark A. Wingertzahn, PhD	Study Chair
NCT00305578	Amit Anand, MD	Principal Investigator
NCT00305656	Tracy Batchelor	Principal Investigator
NCT00305669	Lawrence Fong, MD	Study Chair
NCT00305734	Stephen Shibata	Principal Investigator
NCT00305747	Elisabeth I. Heath, MD	Study Chair
NCT00305760	Daniel A. Laheru, MD	Principal Investigator
NCT00305773	Steven Gore	Principal Investigator
NCT00305786	Caio Max S. Rocha Lima, MD	Study Chair
NCT00305812	Darrell White, MD	Study Chair
NCT00305864	David Brachman	Principal Investigator
NCT00305877	Jordan Berlin	Principal Investigator
NCT00305942	David R. Spigel, MD	Principal Investigator
NCT00306072	Jennifer A Williams, MPH	Study Director
NCT00306475	Stefania Bonaccorso, M.D.	Principal Investigator
NCT00306488	Wai Wong, MD, PhD	Principal Investigator
NCT00306618	David A. Reardon, M.D.	Principal Investigator
NCT00306722	James Jones, MD, PharmD	Study Director
NCT00306735	Michael Schuster, M.D.	Principal Investigator
NCT00306748	Jeffrey M. Johnston, MD, FACP	Study Director
NCT00306904	Christine Du Castel, MD	Study Director
NCT00307086	Melissa Alsina, MD	Principal Investigator
NCT00307086	Todd Alekshun, MD	Principal Investigator
NCT00307125	Anil Chandraker, MD	Study Chair
NCT00307125	Mohamed H. Sayegh, MD	Principal Investigator
NCT00307125	William Harmon, MD	Principal Investigator
NCT00307164	Grace A. McComsey, MD	Study Chair
NCT00307164	Judith A. Aberg, MD	Study Chair
NCT00307255	Thomas E. Stinchcombe, MD	Principal Investigator
NCT00307294	Gurkamal S Chatta, MD	Principal Investigator
NCT00307489	Stephen J Rossi, PharmD	Study Director
NCT00307515	James Hart, MD	Study Director
NCT00307736	Lawrence S. Blaszkowsky, MD	Principal Investigator
NCT00308074	Jean A Frazier, MD	Principal Investigator
NCT00308139	Lisa Porter, MD	Study Director
NCT00308243	Joanne Billings, MD	Study Director
NCT00308399	Nicholas J. Talley, M.D., Ph.D.	Principal Investigator
NCT00308412	Ruth A. Karron, MD	Principal Investigator
NCT00308516	David R. Spigel, MD	Principal Investigator
NCT00308529	David R. Spigel, MD	Principal Investigator
NCT00308555	Donald I Abrams, M.D.	Principal Investigator
NCT00308711	Helen Colquhoun, MD	Study Director
NCT00308971	Alp Ikizler, MD	Principal Investigator
NCT00308971	Jonathan Himmelfarb, MD	Principal Investigator
NCT00309322	Mary Tavares, DDS	Principal Investigator
NCT00309335	Athena Papas, DMD	Principal Investigator
NCT00309361	Athena Papas, DMD	Principal Investigator
NCT00309465	Tamra Dukatz, MSN, CRNA	Principal Investigator
NCT00309855	Johannes D. Veldhuis, M.D.	Principal Investigator
NCT00309946	Hedy Kindler	Principal Investigator
NCT00309959	David Alberts	Principal Investigator
NCT00309998	Deepak M. Sahasrabudhe, MD	Study Chair
NCT00310024	Ashraf Badros	Principal Investigator
NCT00310271	Steven Komjathy, MD	Principal Investigator
NCT00310401	Lorraine B Ware, M.D.	Principal Investigator
NCT00310401	Megan Landeck, RN, BSN, APC	Principal Investigator
NCT00310401	Michael A Matthay, M.D.	Principal Investigator
NCT00310856	Francisco Diaz-Mitoma, Dr.	Principal Investigator
NCT00310856	Scott Halperin, Dr.	Principal Investigator
NCT00311350	Jeff Cohn	Study Director
NCT00311519	Javier T Quesada, OD	Principal Investigator
NCT00311584	Cynthia S. Kretschmar, MD	Study Chair
NCT00311584	Rochelle Bagatell, MD	Study Chair
NCT00311610	Allyson Ocean, MD	Study Chair
NCT00311779	Dyal Garg, PhD	Principal Investigator
NCT00311779	Michael Noss, MD	Principal Investigator
NCT00311779	Robert Lewine, MD	Principal Investigator
NCT00311883	Bonnie S Slovis, MD	Principal Investigator
NCT00312026	Ivor Caro, M.D.	Study Director
NCT00312039	Donna Mildvan, MD	Principal Investigator
NCT00312039	Dushyantha Jayaweera, MD	Principal Investigator
NCT00312039	Edwin DeJesus, MD	Principal Investigator
NCT00312039	Judith Feinberg, MD	Principal Investigator
NCT00312039	Melanie Thompson, MD	Principal Investigator
NCT00312039	Michael Saag, MD	Principal Investigator
NCT00312039	Richard Pollard, MD	Principal Investigator
NCT00312052	John Riefler, MD	Study Director
NCT00312091	Nirun Vanprapar, MD	Study Chair
NCT00312117	Somjot S Brar, M.D.	Principal Investigator
NCT00312338	Steven J. Lichtenstein, M.D.	Principal Investigator
NCT00312663	James F. Cummings, MD	Principal Investigator
NCT00312702	James F Cummings, MD	Principal Investigator
NCT00312728	David Karlin, M.D.	Study Director
NCT00312780	Sanjay K Aggarwal, MD, MBA	Study Director
NCT00312923	Barbara A Swanson, DNSc	Principal Investigator
NCT00313079	Nelson N Teng	Sub-Investigator
NCT00313183	Lisa Porter, MD	Study Director
NCT00313235	Anna Karolina Palucka, MD, PhD	Study Director
NCT00313235	Joseph W. Fay, MD	Principal Investigator
NCT00313339	ARSHED A QUYYUMI, MD	Principal Investigator
NCT00313391	Dragana Bugarski-Kirola, MD	Principal Investigator
NCT00313508	Jeffrey S. Weber, M.D., Ph.D.	Principal Investigator
NCT00313560	Joseph Herman, MD	Study Chair
NCT00313599	Mark M. Moasser, MD	Study Chair
NCT00313625	William I. Bensinger, MD	Principal Investigator
NCT00313716	Claudia Robertson, MD	Principal Investigator
NCT00314106	Steven A Rosenberg, M.D.	Principal Investigator
NCT00314132	Steven G Hull, MD	Principal Investigator
NCT00314145	Luis Angles, M.D.	Principal Investigator
NCT00314210	Martin Brecher, MD	Study Director
NCT00314262	Dong Shin, MD	Principal Investigator
NCT00314340	Barth L Wilsey, MD	Principal Investigator
NCT00314574	Karin Rosen, M.D., Ph.D.	Study Director
NCT00314678	John P Fruehauf, MD, PhD	Principal Investigator
NCT00314743	John F DiPersio, M.D., Ph.D.	Principal Investigator
NCT00314756	Phillip M Williford, MD	Principal Investigator
NCT00314808	Deborah H Allen, MSN, RN, CNS, FNP-BC, AOCNP	Principal Investigator
NCT00314873	Patrick Loehrer	Principal Investigator
NCT00315146	Stephen B Kritchevsky, PhD	Principal Investigator
NCT00315250	Danna Jennings, MD	Principal Investigator
NCT00315302	David Weakley, M.D.	Study Chair
NCT00315302	Susan A. Cotter, O.D.	Study Chair
NCT00315328	Mitchell M. Scheiman, O.D.	Study Chair
NCT00315328	Richard W. Hertle, M.D.	Study Chair
NCT00315640	Theresa Landry	Study Director
NCT00315861	Howard Burris, MD	Principal Investigator
NCT00315900	John L Shuster, MD	Principal Investigator
NCT00315952	David E. Kelley, MD	Principal Investigator
NCT00316264	Pamela Griffin, M.D.	Study Director
NCT00316303	Lisa Dixon, MD	Principal Investigator
NCT00316303	Stanley D. Rosenberg, PhD	Principal Investigator
NCT00316407	Saul Rivkin, MD	Principal Investigator
NCT00316472	Daniel W Coyne, M.D&gt;	Principal Investigator
NCT00316589	Edgar Turner Overton, MD	Principal Investigator
NCT00316602	Richard N Greenberg, M.D.	Principal Investigator
NCT00316797	John Seibyl, MD	Principal Investigator
NCT00316849	Jann Sarkaria	Principal Investigator
NCT00316875	William J Gradishar, M.D.	Principal Investigator
NCT00316914	Axel Grothey, MD	Study Chair
NCT00316940	James R. Berenson, MD	Principal Investigator
NCT00316953	Richard Aplenc	Principal Investigator
NCT00317200	Nasser Hanna, M.D.	Study Chair
NCT00317694	Simon Roe, MB ChB	Principal Investigator
NCT00317720	Francisco Esteva, MD	Principal Investigator
NCT00317785	George B. McDonald, MD	Principal Investigator
NCT00317798	J. J. Ifthikharuddin, MD	Principal Investigator
NCT00317798	Martin S. Zand, MD, PhD	Principal Investigator
NCT00317811	James R. Berenson, MD	Principal Investigator
NCT00318136	Leonardo Faoro, M.D.	Study Director
NCT00318201	Stephen D Hall, PhD	Principal Investigator
NCT00318292	Jaime B. Long, M.D.	Principal Investigator
NCT00318344	Eric J. Buenz	Principal Investigator
NCT00318370	Susan C. Weil, M.D.	Study Director
NCT00318409	Grant Colfax, M.D.	Principal Investigator
NCT00318708	Elliot Israel, MD	Principal Investigator
NCT00318708	Emily DiMango, MD	Principal Investigator
NCT00318708	Homer A. Boushey, MD	Principal Investigator
NCT00318708	Mario Castro, MD	Principal Investigator
NCT00318708	Monica Kraft, MD	Principal Investigator
NCT00318708	Reuben M Cherniack, MD	Study Chair
NCT00318708	Richard J. Martin, MD	Principal Investigator
NCT00318708	Robert F. Lemanske, MD	Principal Investigator
NCT00318708	Stephen I. Wasserman, MD	Principal Investigator
NCT00318708	Stephen P. Peters, MD, PhD	Principal Investigator
NCT00318708	William J. Calhoun, MD	Principal Investigator
NCT00318760	Kenzie Preston, Ph.D.	Principal Investigator
NCT00318838	Jose M Brum, MD	Study Director
NCT00319046	Timothy Cox, Prof	Principal Investigator
NCT00319592	Nancy L Abdou, MD	Principal Investigator
NCT00319670	Samuel Nurko, MD	Principal Investigator
NCT00319748	Melissa A. Geller, MD	Principal Investigator
NCT00319748	Sarah Cooley, MD	Principal Investigator
NCT00319969	Richard S Ungerleider, MD	Study Director
NCT00319982	Carolyn Y Ho, MD	Principal Investigator
NCT00320073	Elizabeth C. Dees, MD	Principal Investigator
NCT00320203	Theresa Landry	Study Director
NCT00320268	Art Lazarus, MD	Study Director
NCT00320281	Gary Maerz, MD	Principal Investigator
NCT00320658	Anna Durbin, MD	Principal Investigator
NCT00320671	Delbert Robinson, MD	Principal Investigator
NCT00320697	A Eden Evins, MD, MPH	Principal Investigator
NCT00320749	Tanios Saab	Principal Investigator
NCT00320749	Tanios Saab, M.D.	Principal Investigator
NCT00320775	Avner Ingerman, MD	Study Director
NCT00320814	Avner Ingerman, MD	Study Director
NCT00321412	Laurent Fischer, MD	Study Director
NCT00321490	Art Lazarus, MD	Study Director
NCT00321581	Brigitte C Widemann, M.D.	Principal Investigator
NCT00321594	Winnie Yeo	Principal Investigator
NCT00321646	Mary-Ellen Taplin, MD	Principal Investigator
NCT00321672	Trudy F Vanhove, MD	Study Director
NCT00321724	Neil Kay	Principal Investigator
NCT00321828	Norman Wolmark, MD	Principal Investigator
NCT00321893	Giulia Veronesi, MD	Study Chair
NCT00321893	Scott M. Lippman, MD, FACP	Study Chair
NCT00321932	Linda J. Burns, MD	Study Chair
NCT00322101	Bart Scott	Principal Investigator
NCT00322127	Richard W Childs, M.D.	Principal Investigator
NCT00322153	Stephen M Graham, PhD	Study Director
NCT00322608	Matthew A Spear, M.D.	Study Director
NCT00322699	Unyime O Nseyo, M.D.	Principal Investigator
NCT00322751	Dennie Jones, MD	Principal Investigator
NCT00322946	Anna Durbin, MD	Principal Investigator
NCT00322972	Kieran S O'Brien, MPH	Study Director
NCT00322972	Paul Emerson, PhD	Study Director
NCT00322972	Tom Lietman, MD	Principal Investigator
NCT00323037	Barry Greenberg, MD	Study Chair
NCT00323102	Barry Hogstrom, M. D.	Study Director
NCT00323115	Camilo E. Fadul, MD	Principal Investigator
NCT00323414	Arthur J. McCullough, M.D.	Principal Investigator
NCT00323414	Srinivasan Dasarathy, M.D.	Principal Investigator
NCT00323739	John D. Hainsworth, MD	Principal Investigator
NCT00323869	Heather A Wakelee, MD	Principal Investigator
NCT00324129	Gregory Reid, MSc, MBA	Study Director
NCT00324168	M. Srinivasan, M.S., O.D.	Principal Investigator
NCT00324168	Mike Zegans, M.D.	Principal Investigator
NCT00324168	Nisha Acharya, M.D., M.S.	Principal Investigator
NCT00324168	Thomas M Lietman, M.D.	Study Director
NCT00324194	Gregory Reid, MSc, MBA	Study Director
NCT00324220	Gregory Reid, MSc, MBA	Study Director
NCT00324363	James Malone, MD	Study Director
NCT00324415	David M. Aboulafia, MD	Principal Investigator
NCT00324415	Joseph A. Sparano, MD	Study Chair
NCT00324415	Lisa A. Kachnic, MD	Principal Investigator
NCT00324454	Richard S Bedlack, MD, PhD	Principal Investigator
NCT00324480	Gary Schwartz	Principal Investigator
NCT00324506	Elliot M Frohman, MD/PhD	Principal Investigator
NCT00324519	Keri A Baacke, MD	Principal Investigator
NCT00324727	Marybeth S. Hughes, MD	Principal Investigator
NCT00324870	Michael Carducci	Principal Investigator
NCT00324896	Matthew Menza, MD	Principal Investigator
NCT00324987	Charles Blanke	Principal Investigator
NCT00325013	Steve D Freedman, MD, PhD	Principal Investigator
NCT00325026	Keri a Baacke, MD	Principal Investigator
NCT00325403	Kevin Laliberte, PharmD	Study Director
NCT00325481	Maria Allende, M.D.	Study Director
NCT00325494	Susan C. Weil, M.D.	Study Director
NCT00325507	Robert J Amato, MD	Principal Investigator
NCT00325572	Jeanette C Ramer, MD	Principal Investigator
NCT00325819	Lisa A Jackson, MD, MPH	Principal Investigator
NCT00325949	Rita Jain, M.D.	Study Director
NCT00325962	Martha Nicholson, MD	Study Director
NCT00326092	Julia White	Study Director
NCT00326170	Guillermo Garcia-Manero, MD	Principal Investigator
NCT00326339	Arthur Kavanaugh, M.D.	Principal Investigator
NCT00326339	Elliott Grossbard, M.D.	Study Director
NCT00326339	Michael Weinblatt, M.D.	Principal Investigator
NCT00326417	Mary Horowitz, MD	Study Director
NCT00326495	Shivaani Kummar, M.D.	Principal Investigator
NCT00326599	Alex A. Adjei, MD, PhD	Study Chair
NCT00326612	Francis Filloux, MD	Study Chair
NCT00326612	Jeff Schunk, MD	Study Chair
NCT00326612	Maija Holsti, MD, MPH	Principal Investigator
NCT00326625	Merav Bassan, PhD.	Study Chair
NCT00326664	Mark Kieran	Principal Investigator
NCT00326885	Jonathan Berek, MD MMSc	Study Chair
NCT00326898	Naomi Balzer-Haas	Principal Investigator
NCT00327002	Daniel Rader, MD	Principal Investigator
NCT00327223	Evan Hersh, MD	Study Director
NCT00327340	Eric Winquist, MD, MSc	Principal Investigator
NCT00327340	Fred Saad, MD, FRCS	Principal Investigator
NCT00327392	James B Jones, MD, PharmD	Study Director
NCT00327444	Walter GOTLIEB	Principal Investigator
NCT00327600	Evan Hersh, MD	Study Director
NCT00327834	Susan L: McElroy, MD	Principal Investigator
NCT00328497	Matthew H. Kulke, M.D.	Principal Investigator
NCT00328640	David M Grosvenor, MPH	Study Director
NCT00328640	S C Johnston, MD	Principal Investigator
NCT00328692	Barry Massie, MD	Study Chair
NCT00328692	Christopher O'Connor, MD	Study Chair
NCT00328692	Marco Metra, MD	Principal Investigator
NCT00329030	Mary Horowitz, MD	Study Director
NCT00329095	Alan L. Robin, MD	Principal Investigator
NCT00329264	Willie Earley, MD	Study Director
NCT00329368	Richard A Messmann, MD, MHS, BSc	Study Director
NCT00329381	Gailen D. Marshall, MD/PhD	Principal Investigator
NCT00329433	Bryan Meyers, MD	Study Chair
NCT00329433	Charles Hantler, MD	Study Director
NCT00329433	Michael S Avidan, MBBCh	Principal Investigator
NCT00329446	Anders Neijber, MD	Study Director
NCT00329589	Adam Dicker, MD, PhD	Principal Investigator
NCT00329641	Ana Aparicio	Principal Investigator
NCT00329784	Gideon Lack, MD	Principal Investigator
NCT00329797	Colleen A. Lawton, MD	Principal Investigator
NCT00329797	Margaret Chamberlain-Wilmoth, PhD, MSS, RN	Study Chair
NCT00329797	Matthew R. Smith, MD	Study Chair
NCT00330044	Maria Werner-Wasik, MD	Principal Investigator
NCT00330070	Alan Heller, MD	Principal Investigator
NCT00330070	Busse William, MD	Principal Investigator
NCT00330070	Edward Kerwin, MD	Principal Investigator
NCT00330070	Eli Meltzer, MD	Principal Investigator
NCT00330070	Jonathan Corren, MD	Principal Investigator
NCT00330070	Michael J Noonan	Principal Investigator
NCT00330070	S. David Miller, MD	Principal Investigator
NCT00330070	Y. Hsu, MD	Principal Investigator
NCT00330161	Maha Hussain	Principal Investigator
NCT00330174	Jennifer S Potter, PhD	Principal Investigator
NCT00330174	Richard Rosenthal, MD	Principal Investigator
NCT00330174	Susan C Sonne, PharmD, BCPP	Principal Investigator
NCT00330252	Jennifer R Brown, MD, PhD	Principal Investigator
NCT00330421	Jeffrey Morgan	Principal Investigator
NCT00330486	Bryan K. Tolliver, M.D., Ph.D.	Principal Investigator
NCT00330486	Kathleen T. Brady, M.D., Ph.D.	Study Director
NCT00330525	Michael Camilleri, M.D.	Principal Investigator
NCT00330551	Keith H. Nuechterlein, PhD	Principal Investigator
NCT00330655	James I Hudson, M.D., Sc.D.	Principal Investigator
NCT00330733	Peter Reaven, MD	Principal Investigator
NCT00330798	Matthew Caldwell	Principal Investigator
NCT00330850	Richard Lipton, MD	Principal Investigator
NCT00330863	Nina R. Schooler, PhD	Study Director
NCT00330993	Patricia A. Lohr, MD	Principal Investigator
NCT00331006	Cassandra Josephson, MD	Principal Investigator
NCT00331006	Charles Sexauer, MD	Principal Investigator
NCT00331006	Cindy Leissinger, MD	Principal Investigator
NCT00331006	Diane Nugent, MD	Principal Investigator
NCT00331006	Ellis Neufeld, MD	Principal Investigator
NCT00331006	Janna Journeycake, MD	Principal Investigator
NCT00331006	Joan Gill, MD	Principal Investigator
NCT00331006	Keith McCrae, MD	Principal Investigator
NCT00331006	Leonard Valentino, MD	Principal Investigator
NCT00331006	Leslie Raffini, MD	Principal Investigator
NCT00331006	Marcella Torres, MD	Principal Investigator
NCT00331006	Margaret Ragni, MD	Principal Investigator
NCT00331006	Nigel Key, MD	Principal Investigator
NCT00331006	Susan F. Assmann, PhD	Principal Investigator
NCT00331188	Adrian Reuben, M.D.	Principal Investigator
NCT00331188	Alvaro Koch, M.D.	Principal Investigator
NCT00331188	Arun J. Sanyal, M.D.	Principal Investigator
NCT00331188	Daniel R. Ganger, M.D.	Principal Investigator
NCT00331188	Gary A. Abrams, M.D.	Principal Investigator
NCT00331188	Hugo Vargas, M.D.	Principal Investigator
NCT00331188	James F. Trotter, M.D.	Principal Investigator
NCT00331188	Jeffrey S. Crippin, M.D.	Principal Investigator
NCT00331188	Joseph Lim, M.D.	Study Chair
NCT00331188	Kimberly Beavers, M.D., M. Ph.	Principal Investigator
NCT00331188	Michael B. Fallon, M.D.	Principal Investigator
NCT00331188	Michele D. Bishop, M.D.	Principal Investigator
NCT00331188	Naga P. Chalasani, M.D.	Principal Investigator
NCT00331188	Nezam H. Afdhal, M.D.	Principal Investigator
NCT00331188	Paul J. Thuluvath, M.D.	Principal Investigator
NCT00331188	Robert S. McFadden, M.D.	Principal Investigator
NCT00331188	Samuel Sigal, M.D.	Principal Investigator
NCT00331188	Tarek Hassanein, M.D.	Principal Investigator
NCT00331201	Cindy K Barney, NNP	Principal Investigator
NCT00331227	Thomas Barringer, MD	Principal Investigator
NCT00331279	Rogerio Lobo, M.D.	Principal Investigator
NCT00331344	Andrea Harzstark	Principal Investigator
NCT00331409	Christopher W. Ryan, MD	Study Chair
NCT00331500	Stella Robertson	Study Director
NCT00331513	Guillermo Garcia-Manero	Principal Investigator
NCT00331552	Hannah Linden	Principal Investigator
NCT00331643	Brigitte Widemann	Principal Investigator
NCT00331682	Eileen O'Reilly	Principal Investigator
NCT00331799	Wei Zhang, MD, PhD	Principal Investigator
NCT00331916	Stella Robertson, Ph.D.	Study Director
NCT00331955	Robert Wenham	Principal Investigator
NCT00332254	Virginia B Kraus, MD, PhD	Study Chair
NCT00332579	Jon E Grant, MD, JD	Principal Investigator
NCT00332605	Jon E Grant, MD, JD	Principal Investigator
NCT00332774	Stephen Lane	Study Director
NCT00332956	George Risi, MD	Principal Investigator
NCT00332956	Iaasc Marcadis, MD	Principal Investigator
NCT00332956	Ivor Emmanual, MD	Principal Investigator
NCT00332956	John Jacobsen, MD	Principal Investigator
NCT00332956	Keith Reisinger, MD	Principal Investigator
NCT00332956	L. Tyler Wadsworth, MD	Principal Investigator
NCT00332956	Richard Greenberg, MD	Principal Investigator
NCT00332956	Steven Folkerth, MD	Principal Investigator
NCT00332956	Vicki Grieff, MD	Principal Investigator
NCT00333177	Keith H. Nuechterlein, PhD	Principal Investigator
NCT00333255	Andrew Maxwell	Study Director
NCT00333502	Glenn Weiss, M.D.	Principal Investigator
NCT00333502	Jeffrey D. Neidhart, M.D.	Principal Investigator
NCT00333502	Yun Yen, M.D., Ph.D.	Principal Investigator
NCT00333515	Ralph A Schutz, MD	Principal Investigator
NCT00333528	Ralph A Schutz, MD	Principal Investigator
NCT00333918	Ralph Bianca, PhD	Study Director
NCT00334048	David J. Hellerstein, MD	Principal Investigator
NCT00334074	Edward Agura, MD	Principal Investigator
NCT00334321	Perry W Grigsby, M.D.	Principal Investigator
NCT00334347	John D Matthews, M.D.	Principal Investigator
NCT00334438	Thomas C. Shea, MD	Principal Investigator
NCT00334542	Vered Stearns, MD	Principal Investigator
NCT00334659	Susan W Cox, PhD	Study Director
NCT00334828	Dan Rossignol	Study Director
NCT00334880	Joseph Biederman, MD	Principal Investigator
NCT00334893	Martee Hensley	Principal Investigator
NCT00334958	Francesco Bibbiani, M.D.	Study Director
NCT00335153	Janet Benesh	Study Director
NCT00335244	Fredrick E. Barr, MD, MSCI	Principal Investigator
NCT00335270	Charles Hicks, MD	Principal Investigator
NCT00335270	David A Wohl, MD	Principal Investigator
NCT00335270	Jason Flamm, MD	Principal Investigator
NCT00335270	Jeffrey Lennox, MD	Principal Investigator
[truncated: 15,082 more rows]

## Sheet: 2_Completed_NonPerson
NCT Number	Last name	Role
NCT00091559	Medical Monitor	Study Director
NCT00092001	Pfizer CT.gov Call Center	Study Director
NCT00094094	Pfizer CT.gov Call Center	Study Director
NCT00094458	Centocor Ortho Biotech Services, L.L.C. Clinical Trial	Study Director
NCT00094835	MD	Study Director
NCT00094861	MD	Study Director
NCT00095147	Bristol-Myers Squibb	Study Director
NCT00095199	Call 1-877-CTLILLY (1-877-285-4559) or 1-317-615-4559 Mon - Fri 9 AM - 5 PM Eastern time (UTC/GMT - 5 hours, EST)	Study Director
NCT00097877	Global Clinical Registry (GCR, 1452)	Study Director
NCT00097929	Medical Monitor	Study Director
NCT00097981	Johnson & Johnson Pharmaceutical Research & Development, L.L. C. Clinical Trial	Study Director
NCT00098046	Novartis Pharmaceuticals	Study Chair
NCT00098059	Novartis Pharmaceuticals	Study Director
NCT00099801	Novartis	Study Director
NCT00100048	Medical Monitor	Study Director
NCT00101439	Medical Monitor	Study Director
NCT00101582	MD	Study Director
NCT00101595	Bristol-Myers Squibb	Study Director
NCT00101608	Bristol-Myers Squibb	Study Director
NCT00101660	Bristol-Myers Squibb	Study Director
NCT00101803	Novartis Pharmaceuticals	Study Director
NCT00102167	Medical Monitor	Study Director
NCT00102323	MD	Study Director
NCT00102336	MD	Study Director
NCT00102388	Novartis Pharmaceuticals	Study Director
NCT00102466	Novartis Pharmaceuticals	Study Director
NCT00102609	Johnson & Johnson Pharmaceutical Research and Development, LLC Clinical Trial	Study Director
NCT00102726	GSK Clinical Trials	Study Director
NCT00102739	GSK Clinical Trials	Study Director
NCT00102804	Call 1-877-CTLILLY (1-877-285-4559) or 1-317-615-4559 Mon - Fri 9 AM - 5 PM Eastern time (UTC/GMT - 5 hours, EST)	Study Director
NCT00103454	GSK Clinical Trials	Study Director
NCT00103610	Medical Monitor	Study Director
NCT00103662	Medical Monitor	Study Director
NCT00103818	Medical Monitor	Study Director
NCT00103844	Bristol-Myers Squibb	Study Director
NCT00103857	Medical Monitor	Study Director
NCT00104078	Medical Monitor, MD	Study Director
NCT00104182	Global Clinical Registry (GCR, 1452)	Study Director
NCT00104364	Medical Monitor	Study Director
NCT00104650	MD	Study Director
NCT00105079	Clinical Trials	Study Director
NCT00105092	Call 1-877-CTLILLY (1-877-285-4559) or 1-317-615-4559 Mon - Fri 9 AM to 5 PM Eastern Time (UTC/GMT - 5 hours, EST)	Study Director
NCT00105157	Medical Monitor	Study Director
NCT00105196	Bristol-Myers Squibb	Study Director
NCT00105326	Johnson & Johnson Pharmaceutical Research & Development, L.L. C. Clinical Trial	Study Director
NCT00105443	Bayer Study Director	Study Director
NCT00105950	GSK Clinical Trials	Study Director
NCT00105989	Call 1-877-CTLILLY (1-877-285-4559) or 1-317-615-4559 Mon - Fri 9 AM - 5 PM Eastern Time (UTC/GMT - 5 hours, EST)	Study Director
NCT00106002	Call 1-877-CTLILLY (1-877-285-4559) or 1-317-615-4559 Mon - Fri 9 AM - 5 PM Eastern time (UTC/GMT - 5 hours, EST)	Study Director
NCT00106145	Medical Monitor	Study Director
NCT00106340	Novartis Pharmaceuticals	Study Director
NCT00106353	Pfizer CT.gov Call Center	Study Director
NCT00106392	Central Contact	Study Director
NCT00106509	Medical Monitor	Study Director
NCT00106522	Clinical Trials	Study Director
NCT00106535	Clinical Trials	Study Director
NCT00106574	Clinical Trials	Study Director
NCT00106626	Medical Monitor	Study Director
NCT00106639	Pfizer CT.gov Call Center	Study Director
NCT00106704	Medical Monitor	Study Director
NCT00107016	Novartis Pharmaceuticals	Study Director
NCT00107757	GSK Clinical Trials	Study Director
NCT00108017	Medical Monitor	Study Director
NCT00108082	GSK Clinical Trials	Study Director
NCT00108849	Global Clinical Registry (GCR, 1452)	Study Director
NCT00108914	GSK Clinical Trials	Study Director
NCT00108953	Bayer Study Director	Study Director
NCT00109031	MD	Study Director
NCT00109096	Call 1-877-CTLILLY (1-877-285-4559) or 1-317-615-4559 Mon - Fri 9 AM - 5 PM Eastern time (UTC/GMT - 5 hours, EST)	Study Director
NCT00109135	Medical Monitor	Study Director
NCT00109343	Medical Monitor	Study Director
NCT00109408	Clinical Trials	Study Director
NCT00109486	GSK Clinical Trials	Study Director
NCT00110240	Novartis Pharmaceuticals	Study Director
NCT00110266	Novartis Pharmaceuticals	Study Director
NCT00110305	Tibotec Pharmaceuticals, Ireland Clinical Trial	Study Director
NCT00110357	Call 1-877-CTLILLY (1-877-285-4559) or 1-317-615-4559 Mon - Fri 9 AM - 5 PM Eastern time (UTC/GMT - 5 hours, EST)	Study Director
NCT00110422	Bristol-Myers Squibb	Study Director
NCT00110435	Medical Monitor	Study Director
NCT00110487	Medical Monitor	Study Director
NCT00110617	Novartis Pharmaceuticals	Study Director
NCT00110799	GSK Clinical Trials	Study Director
NCT00110877	Tibotec Pharmaceuticals Clinical Trial	Study Director
NCT00110942	MD	Study Director
NCT00110981	MD	Study Director
NCT00110994	Bayer Study Director	Study Director
NCT00111007	Bayer Study Director	Study Director
NCT00111020	Bayer Study Director	Study Director
NCT00111189	Johnson & Johnson Pharmaceutical Research & Development, L.L. C. Clinical Trial	Study Director
NCT00111631	Clinical Trials	Study Director
NCT00111644	Clinical Trials	Study Director
NCT00111670	Clinical Trials	Study Director
NCT00111683	Medical Monitor	Study Director
NCT00111709	Medical Monitor	Study Director
NCT00111722	Medical Monitor	Study Director
NCT00111787	GSK Clinical Trials, MD	Study Director
NCT00111800	GSK Clinical Trials, MD	Study Director
NCT00111813	Medical Monitor	Study Director
NCT00111891	Medical Monitor	Study Director
NCT00112346	Call 1-877-CTLILLY (1-877-285-4559) or 1-317-615-4559 Mon - Fri 9 AM - 5 PM Eastern time (UTC/GMT - 5 hours, EST)	Study Director
NCT00112437	Medical Monitor	Study Director
NCT00113269	Central Contact	Study Director
NCT00113308	GSK Clinical Trials	Study Director
NCT00113516	Pfizer CT.gov Call Center	Study Director
NCT00113568	Clinical Development Support	Study Director
NCT00113594	Call 1-877-CTLILLY (1-877-285-4559) or 1-317-615-4559 Mon - Fri 9 AM - 5 PM Eastern Time (UTC/GMT - 5 hours, EST)	Study Director
NCT00113607	Johnson & Johnson Pharmaceutical Research & Development, L.L. C. Clinical Trial	Study Director
NCT00113815	Johnson & Johnson Pharmaceutical Research & Development, L.L. C. Clinical Trial	Study Director
NCT00113893	Scios, Inc. Clinical Trial	Study Director
NCT00114686	AstraZeneca Seroquel Medical Science Director, MD	Study Director
NCT00114699	GSK Clinical Trials	Study Director
NCT00114777	Bristol-Myers Squibb	Study Director
NCT00115050	Tibotec Pharmaceuticals Clinical Trial	Study Director
NCT00115765	MD	Study Director
NCT00116103	Astellas Medical Monitor, MD	Study Director
NCT00116519	Call 1-877-CTLILLY (1-877-285-4559) or 1-317-615-4559 Monday - Friday 9am-5pm Eastern time (UTC/GMT - 5 hours, EST)	Study Director
NCT00116753	Clinical Development Support	Study Director
NCT00116818	GSK Clinical Trials	Study Director
NCT00116831	GSK Clinical Trials	Study Director
NCT00116844	GSK Clinical Trials	Study Director
NCT00116883	GSK Clinical Trials	Study Director
NCT00117273	Duramed Protocol Chair	Study Chair
NCT00117286	Clinical Development Support	Study Director
NCT00117325	GSK Clinical Trials	Study Director
NCT00117338	Medical Monitor	Study Director
NCT00117468	Duramed Protocol Chair	Study Chair
NCT00117481	Duramed Protocol Chair	Study Chair
NCT00117507	Novartis Pharmaceuticals	Study Director
NCT00117598	Pfizer CT.gov Call Center	Study Director
NCT00117637	Bayer Study Director	Study Director
NCT00117650	Medical Monitor	Study Director
NCT00117689	Medical Monitor	Study Director
NCT00118703	GSK Clinical Trials	Study Director
NCT00118729	GSK Clinical Trials	Study Director
NCT00118742	Clinical Trials	Study Director
NCT00118755	Clinical Trials	Study Director
NCT00119639	Bayer Study Director	Study Director
NCT00119652	AstraZeneca Seroquel Medical Science Director, MD	Study Director
NCT00119678	Bristol-Myers Squibb	Study Director
NCT00119756	Johnson & Johnson Pharmaceutical Research & Development, L.L. C. Clinical Trial	Study Director
NCT00120536	Novartis Pharmaceuticals	Study Director
NCT00120900	GSK Clinical Trials	Study Director
NCT00121381	Novartis Pharmaceuticals	Study Chair
NCT00121602	MD	Study Director
NCT00121628	MD	Study Director
NCT00121680	Eisai Inc.	Study Director
NCT00121836	Clinical Trials	Study Director
NCT00122382	Bristol-Myers Squibb	Study Director
NCT00122837	Call 1-877-CTLILLY (1-877-285-4559) or 1-317-615-4559 Mon-Fri 9am-5pm Eastern time (UTC/GMT - 5 hours, EST)	Study Director
NCT00122863	Call 1-877-CTLILLY (1-877-285-4559) or 1-317-615-4559 Mon-Fri 9 AM - 5 PM Eastern time (UTC/GMT- 5 hours, EST)	Study Director
NCT00123201	Global Clinical Director Solvay	Study Director
NCT00123461	Medical Monitor	Study Director
NCT00123474	Bristol-Myers Squibb	Study Director
NCT00123487	Bristol-Myers Squibb	Study Director
NCT00123903	GSK Clinical Trials, MD	Study Director
NCT00124280	Novartis Pharmaceuticals	Study Director
NCT00124332	ICD CSD	Study Director
NCT00124449	Bristol-Myers Squibb	Study Director
NCT00124982	Bristol-Myers Squibb	Study Director
NCT00125125	Novartis Pharmaceuticals	Study Chair
NCT00125138	Email contact via H. Lundbeck A/S	Study Director
NCT00125190	Ipsen Study Director, M.D.	Study Director
NCT00125385	Medical Monitor	Study Director
NCT00125879	Medical Monitor	Study Director
NCT00125892	Call 1-877-CTLILLY (1-877-285-4559) or 1-317-615-4559 Mon-Fri 9 AM to 5 PM Eastern Time (UTC/GMT - 5 hours, EST)	Study Director
NCT00125918	Call 1-877-CTLILLY (1-877-285-4559) or 1-317-615-4559 Mon - Fri 9 AM - 5 PM Eastern time (UTC/GMT - 5 hours, EST)	Study Director
NCT00127270	Novartis Pharmaceuticals Corp.	Study Director
NCT00127283	Global Clinical Registry (GCR, 1452)	Study Director
NCT00127634	Call 1-877-CTLILLY (1-877-285-4559) or 1-317-615-4559 Mon-Fri 9 AM - 5 PM Eastern time (UTC/GMT - 5 hours, EST)	Study Director
NCT00127933	Clinical Trials	Study Director
NCT00128830	Tibotec Pharmaceuticals, Ireland Clinical Trial	Study Director
NCT00128934	Medical Monitor, MD	Study Director
NCT00129623	Clinical Trials	Study Director
NCT00130793	Medical Monitor	Study Director
NCT00131261	enquiries@topotarget.com	Study Chair
NCT00131430	Medical Monitor	Study Director
NCT00131638	MD	Study Director
NCT00132678	Johnson & Johnson Pharmaceutical Research & Development, L.L. C. Clinical Trial	Study Director
NCT00133380	Call 1-877-CTLILLY (1-877-285-4559) or 1-317-615-4559 Mon - Fri 9 AM - 5 PM Eastern time (UTC/GMT - 5 hours, EST)	Study Director
NCT00134147	Pfizer CT.gov Call Center	Study Director
NCT00134199	Pfizer CT.gov Call Center	Study Director
NCT00134459	Medical Monitor, MD	Study Director
NCT00134485	Pfizer CT.gov Call Center	Study Director
NCT00134498	Pfizer CT.gov Call Center	Study Director
NCT00134511	Pfizer CT.gov Call Center	Study Director
NCT00134719	GSK Clinical Trials	Study Director
NCT00135005	Novartis Pharmaceuticals	Study Director
NCT00135304	MD	Study Director
NCT00135356	Bristol-Myers Squibb	Study Director
NCT00135421	Bristol-Myers Squibb	Study Director
NCT00135993	UCB Clinical Trial Call Center	Study Director
NCT00136045	UCB Clinical Trial Call Center	Study Director
NCT00136968	Pfizer CT.gov Call Center	Study Director
NCT00137072	Pfizer CT.gov Call Center	Study Director
NCT00137371	Medical Monitor	Principal Investigator
NCT00137423	Pfizer CT.gov Call Center	Study Director
NCT00137436	Pfizer CT.gov Call Center	Study Director
NCT00137449	Pfizer CT.gov Call Center	Study Director
NCT00138567	Novartis Pharmaceuticals	Study Director
NCT00138606	Novartis Pharmaceuticals	Study Director
NCT00138632	Novartis Customer Information	Study Chair
NCT00139061	Pfizer CT.gov Call Center	Study Director
NCT00139776	Pfizer CT.gov Call Center	Study Director
NCT00139789	UCB Clinical Trial Call Center	Study Director
NCT00139880	UCB Clinical Trial Call Center	Study Director
NCT00139906	Global Clinical Director Solvay	Study Director
NCT00139919	Global Clinical Director Solvay	Study Director
NCT00140712	GSK Clinical Trials	Study Director
NCT00141167	Pfizer CT.gov Call Center	Study Director
NCT00141271	Pfizer CT.gov Call Center	Study Director
NCT00141284	Pfizer CT.gov Call Center	Study Director
NCT00141349	Pfizer CT.gov Call Center	Study Director
NCT00141479	Global Clinical Director Solvay	Study Director
NCT00141505	Global Clinical Director Solvay	Study Director
NCT00141661	Pfizer CT.gov Call Center	Study Director
NCT00141791	Medical Monitor	Study Director
NCT00141817	Medical Monitor	Study Director
NCT00141830	Medical Monitor	Study Director
NCT00141830	Trial Manager	Principal Investigator
NCT00142103	Pfizer CT.gov Call Center	Study Director
NCT00143156	Pfizer CT.gov Call Center	Study Director
NCT00143260	Pfizer CT.gov Call Center	Study Director
NCT00143325	Pfizer CT.gov Call Center	Study Director
NCT00143481	Pfizer CT.gov Call Center	Study Director
NCT00143611	VP Clinical Science	Study Director
NCT00143663	Medical Director	Study Director
NCT00143676	Medical Director	Study Director
NCT00144300	Boehringer Ingelheim	Study Chair
NCT00145327	Novartis Pharmaceuticals	Study Chair
NCT00146224	MD	Study Director
NCT00146289	Boehringer Ingelheim Study Coordinator	Study Chair
NCT00147498	Pfizer CT.gov Call Center	Study Director
NCT00147537	Pfizer CT.gov Call Center	Study Director
NCT00147628	Pfizer CT.gov Call Center	Study Director
NCT00148915	HoffmannLaRoche Clinical Trials, MD	Study Director
NCT00148941	GSK Clinical Trials	Study Director
NCT00150215	Pfizer CT.gov Call Center	Study Director
NCT00150397	Pfizer CT.gov Call Center	Study Director
NCT00151333	Medical Monitor	Study Director
NCT00151398	Medical Monitor	Study Director
NCT00151489	Pfizer CT.gov Call Center	Study Director
NCT00151528	Pfizer CT.gov Call Center	Study Director
NCT00151879	UCB Clinical Trial Call Center	Study Director
NCT00152386	UCB Clinical Trial Call Center	Study Director
NCT00156910	Medical Director	Study Chair
NCT00156949	MD	Study Director
NCT00157326	Call 1-877-CTLILLY (1-877-285-4559) or 1-317-615-4559 Mon - Fri 9 AM - 5 PM Eastern time (UTC/GMT - 5 hours, EST)	Study Director
NCT00157339	Call 1-877-CTLILLY (1-877-285-4559) or 1-317-615-4559 Mon-Fri 9 AM to 5 PM Eastern Time (UTC/GMT - 5 hour, EST)	Study Director
NCT00158600	Medical Monitor	Study Director
NCT00159653	Pfizer CT.gov Call Center	Study Director
NCT00159705	Pfizer CT.gov Call Center	Study Director
NCT00159731	Pfizer CT.gov Call Center	Study Director
NCT00160342	Global Clinical Director Solvay	Study Director
NCT00160602	UCB Clinical Trial Call Center	Study Director
NCT00160641	UCB Clinical Trial Call Center	Study Director
NCT00161681	Medical Monitor, MD	Study Director
NCT00162123	Bristol-Myers Squibb	Study Director
NCT00162136	Bristol-Myers Squibb	Study Director
NCT00162149	Bristol-Myers Squibb	Study Director
NCT00162292	Bristol-Myers Squibb	Study Director
NCT00162305	Bristol Myers Squibb	Study Director
NCT00162318	Call 1-877-CTLILLY (1-877-285-4559) or 1-317-615-4559 Mon - Fri 9 AM - 5 PM Eastern time (UTC/GMT - 5 hours, EST)	Study Director
NCT00162981	Email contact via H. Lundbeck A/S	Study Director
NCT00163046	Pfizer CT.gov Call Center	Study Director
NCT00163085	Pfizer CT.gov Call Center	Study Director
NCT00168051	Medical Monitor	Study Director
NCT00168051	Trial Manager	Principal Investigator
NCT00168051	Trial Manager	Principal Investigator
NCT00168051	Trial Manager	Principal Investigator
NCT00168051	Trial Manager	Principal Investigator
NCT00168051	Trial Manager	Principal Investigator
NCT00168051	Trial Manager	Principal Investigator
NCT00168103	Program Director, Clinical R&D	Study Director
NCT00168337	Medical Director	Study Director
NCT00168389	Medical Director	Study Director
NCT00168415	Medical Director	Study Director
NCT00168428	Medical Director	Study Director
NCT00168454	Medical Director	Study Director
NCT00168779	Boehringer Ingelheim	Study Chair
NCT00170768	Novartis	Study Chair
NCT00171184	Novartis	Study Chair
NCT00171405	Novartis Pharmaceuticals	Study Director
NCT00171457	Novartis	Study Director
NCT00171470	Novartis	Study Director
NCT00171613	Novartis	Study Chair
NCT00172185	Clinical Development	Study Director
NCT00174434	Pfizer CT.gov Call Center	Study Director
NCT00174720	ICD CSD	Study Director
NCT00174733	ICD CSD	Study Director
NCT00174746	ICD CSD	Study Director
NCT00174785	International Clinical Development	Study Director
NCT00174798	Clinical Sciences & Operations	Study Director
NCT00174837	ICD CSD	Study Director
NCT00174928	Medical Director	Study Director
NCT00175825	UCB Clinical Trial Call Center	Study Director
NCT00175877	UCB Clinical Trial Call Center	Study Director
NCT00189488	MD	Study Director
NCT00190671	Call 1-877-CTLILLY (1-877-285-4559) or 1-317-615-4559 Mon-Fri from 9am- 5pm Eastern time (UTC/GMT - 5 hours, EST)	Study Director
NCT00190853	Call 1-877-CTLILLY (1-877-285-4559) or 1-317-615-4559 Mon-Fri 9 AM – 5 PM Eastern time (UTC/GMT - 5 hours, EST)	Study Director
NCT00190866	Call 1-877-CTLILLY (1-877-285-4559) or 1-317-615-4559 Mon-Fri 9 AM - 5 PM Eastern time (UTC/GMT - 5 hours, EST)	Study Director
NCT00190879	Call 1-877-CTLILLY (1-877-285-4559) or 317-615-4559 Mon-Fri 9 AM - 5 PM Eastern Time (UTC/GMT - 5 hours,EST)	Study Director
NCT00191412	Call 1-877-CTLILLY (1-877-285-4559) or 1-317-615-4559 Mon - Fri 9 AM - 5 PM Eastern time (UTC/GMT) - 5 hours, EST)	Study Director
NCT00193687	Global Clinical Director Solvay	Study Director
NCT00193713	Global Clinical Director Solvay	Study Director
NCT00195208	Medical Monitor	Study Director
NCT00195351	Medical Monitor	Study Director
NCT00195546	Medical Monitor	Study Director
NCT00195546	Trial Manager	Principal Investigator
NCT00195546	Trial Manager	Principal Investigator
NCT00195546	Trial Manager	Principal Investigator
NCT00195546	Trial Manager	Principal Investigator
NCT00195546	Trial Manager	Principal Investigator
NCT00195546	Trial Manager	Principal Investigator
NCT00195546	Trial Manager	Principal Investigator
NCT00195546	Trial Manager	Principal Investigator
NCT00196326	Duramed Protocol Chair	Study Chair
NCT00196339	Duramed Protocol Chair	Study Chair
NCT00196365	Duramed Protocol Chair	Study Chair
NCT00196391	Duramed Protocol Chair	Study Chair
NCT00196989	GSK Clinical Trials	Study Director
NCT00197028	GSK Clinical Trials	Study Director
NCT00197054	GSK Clinical Trials	Study Director
NCT00197080	GSK Clinical Trials	Study Director
NCT00197223	GSK Clinical Trials	Study Director
NCT00197262	GSK Clinical Trials	Study Director
NCT00197288	GSK Clinical Trials	Study Director
NCT00202878	Medical Director	Study Director
NCT00206141	AstraZeneca Seroquel Medical Science Director, MD	Study Director
NCT00206154	AstraZeneca Symbicort Medical Science Director, MD	Study Director
NCT00206167	AstraZeneca Symbicort Medical Science Director, MD	Study Director
NCT00206583	Bayer Study Director	Study Director
NCT00206726	Bayer Study Director	Study Director
NCT00207051	Bristol-Myers Squibb	Study Director
NCT00207077	Call 1-877-CTLILLY (1-877-285-4559) or 1-317-615-4559 Mon - Fri 9 AM - 5 PM Eastern time (UTC/GMT - 5 hours, EST)	Study Director
NCT00207090	Bristol-Myers Squibb	Study Director
NCT00207116	Call 1-877-CTLILLY (1-877-285-4559) or 1-317-615-4559 Mon - Fri 9 AM - 5 PM Eastern time (UTC/GMT - 5 hours, EST)	Study Director
NCT00210496	Janssen Ortho LLC Clinical Trial	Study Director
NCT00210522	Johnson & Johnson Pharmaceutical Research & Development, L.L. C. Clinical Trial	Study Director
NCT00210535	Johnson & Johnson Pharmaceutical Research & Development, L.L. C. Clinical Trial	Study Director
NCT00210548	Johnson & Johnson Pharmaceutical Research & Development, L.L. C. Clinical Trial	Study Director
NCT00210574	Johnson & Johnson Pharmaceutical Research & Development, L.L. C. Clinical Trial	Study Director
NCT00210587	Johnson & Johnson Pharmaceutical Research & Development, L.L. C. Clinical Trial	Study Director
NCT00210600	Johnson & Johnson Pharmaceutical Research & Development, L.L. C. Clinical Trial	Study Director
NCT00210704	Johnson & Johnson Pharmaceutical Research & Development, L.L. C. Clinical Trial	Study Director
NCT00210717	Johnson & Johnson Pharmaceutical Research & Development, L.L. C. Clinical Trial	Study Director
NCT00210899	Johnson & Johnson Pharmaceutical Research & Development, L.L. C. Clinical Trial	Study Director
NCT00210964	Johnson & Johnson Pharmaceutical Research & Development, L.L. C. Clinical Trial	Study Director
NCT00212810	Ortho McNeil Neurologics, Inc. Clinical Trial	Study Director
NCT00212875	Johnson & Johnson Pharmaceutical Research & Development, L.L. C. Clinical Trial	Study Director
NCT00214604	AstraZeneca Crestor Medical Sciences Director, MD	Study Director
NCT00217204	McNeil Consumer & Specialty Pharmaceuticals, a Division of Mc Neil-PPC, Inc. Clinical Trial	Study Director
NCT00219011	Novartis Pharmaceuticals	Study Director
NCT00219050	Novartis Pharmaceuticals	Study Director
NCT00219063	Novartis Pharmaceuticals	Study Director
NCT00219076	Novartis Pharmaceuticals	Study Director
NCT00219102	Novartis Pharmaceuticals	Study Director
NCT00219115	Novartis Pharmaceuticals	Study Director
NCT00219141	Novartis Pharmaceuticals	Study Director
NCT00219154	Novartis Pharmaceuticals	Study Director
NCT00219167	Novartis Pharmaceuticals	Study Director
NCT00219180	Novartis Pharmaceuticals	Study Director
NCT00219193	Novartis Pharmaceuticals	Study Director
NCT00219297	Novartis Pharmaceuticals	Study Director
NCT00219557	Pfizer CT.gov Call Center	Study Director
NCT00219609	Pfizer CT.gov Call Center	Study Director
NCT00219635	Pfizer CT.gov Call Center	Study Director
NCT00220818	Medical Director	Study Director
NCT00225121	Pfizer CT.gov Call Center	Study Director
NCT00225823	GSK Clinical Trials	Study Director
NCT00225862	GSK Clinical Trials	Study Director
NCT00226811	Pfizer CT.gov Call Center	Study Director
NCT00228059	Novartis Pharmcuticals	Study Chair
NCT00228449	Affymax	Study Director
NCT00228462	AstraZeneca Seroquel Medical Science Director, MD	Study Director
NCT00228566	Sponsor's Medical Expert, MD	Study Director
NCT00229008	Johnson & Johnson Pharmaceutical Research & Development, L.L. C. Clinical Trial	Study Director
NCT00229138	Novartis	Study Director
NCT00229437	Medical Director	Study Director
NCT00230516	Nexium Medical Science Director, MD	Study Director
NCT00230776	Pfizer CT.gov Call Center	Study Director
NCT00230789	Pfizer CT.gov Call Center	Study Director
NCT00230828	Global Clinical Director Solvay	Study Director
NCT00231166	Novartis Pharmaceuticals	Study Director
NCT00231166	Novartis Pharmaceuticals	Study Director
NCT00231413	GSK Clinical Trials	Study Director
NCT00231478	Clinical Trials	Study Director
NCT00231569	Medical Monitor	Study Director
NCT00231725	Call 1-877-CTLILLY (1-877-285-4559) or 1-317-615-4559 Mon - Fri 9 AM - 5 PM Eastern time (UTC/GMT - 5 hours, EST)	Study Director
NCT00231777	Medical Monitor	Study Director
NCT00231790	Medical Monitor	Study Director
NCT00231816	Medical Monitor	Study Director
NCT00232141	Pfizer CT.gov Call Center	Study Director
NCT00232154	Pfizer CT.gov Call Center	Study Director
NCT00232180	Pfizer CT.gov Call Center	Study Director
NCT00232297	ICD CSD	Study Director
NCT00232310	ICD CSD	Study Director
NCT00232596	GSK Clinical Trials	Study Director
NCT00233012	Johnson & Johnson Pharmaceutical Research & Development, L.L. C. Clinical Trial	Study Director
NCT00233025	Call 1-877-CTLILLY (1-877-285-4559) or 1-317-615-4559 Mon - Fri 9 AM - 5 PM Eastern time (UTC/GMT - 5 hours, EST)	Study Director
NCT00233883	Clinical Trials	Study Director
NCT00234819	Medical Monitor	Study Director
NCT00235391	Novartis Pharmaceuticals	Study Director
NCT00235755	GSK Clinical Trials	Study Director
NCT00235820	Global Medical Information	Study Director
NCT00237237	Novartis Pharmaceuticals	Study Director
NCT00237250	Novartis Pharmaceuticals	Study Director
NCT00238485	Novartis Customer Care information	Study Chair
NCT00238732	Medical Monitor	Study Director
NCT00239239	MD	Study Director
NCT00239577	GSK Clinical Trials	Study Director
NCT00239876	Novartis	Study Director
NCT00239967	ICD CSD	Study Director
NCT00240617	GSK Clinical Trials	Study Director
NCT00240630	GSK Clinical Trials	Study Director
NCT00240643	GSK Clinical Trials	Study Director
NCT00241436	AstraZeneca Arimidex Medical Sciences Director, MD	Study Director
NCT00241722	GSK Clinical Trials, MD	Study Director
NCT00242476	Medical Monitor	Study Director
NCT00242580	Novartis Pharmaceuticals	Study Chair
NCT00242710	Pfizer CT.gov Call Center	Study Director
NCT00242736	AstraZeneca Nexium Medical Sciences Director, MD	Study Director
NCT00243347	AstraZeneca Oncology Medical Sciences Director, MD	Study Director
NCT00243503	Pfizer CT.gov Call Center	Study Director
NCT00243659	Medical Monitor	Study Director
NCT00244140	Bayer Study Director	Study Director
NCT00244322	Call 1-877-CTLILLY (1-877-285-4559) or 1-317-615-4559 Mon - Fri 9 AM - 5 PM Eastern time (UTC/GMT - 5 hours, EST)	Study Director
NCT00244712	GSK Clinical Trials	Study Director
NCT00244725	GSK Clinical Trials	Study Director
NCT00244751	GSK Clinical Trials	Study Director
NCT00244764	GSK Clinical Trials	Study Director
NCT00245258	Pfizer CT.gov Call Center	Study Director
NCT00245570	Medical Monitor	Study Director
NCT00245973	Medical Monitor, MD	Study Director
NCT00246012	Centocor, Inc. Clinical Trial	Study Director
NCT00246207	Janssen-Ortho Inc. Clinical Trial	Study Director
NCT00246233	Janssen-Ortho Inc. Clinical Trial	Study Director
NCT00246337	Medical Monitor	Study Director
NCT00246571	Pfizer CT.gov Call Center	Study Director
NCT00246610	Pfizer CT.gov Call Center	Study Director
NCT00246623	Pfizer CT.gov Call Center	Study Director
NCT00246636	GSK Clinical Trials	Study Director
NCT00246701	GSK Clinical Trials	Study Director
NCT00247390	Medical Director Clinical Science	Study Director
NCT00247676	Pfizer CT.gov Call Center	Study Director
NCT00248170	Novartis Pharmaceuticals	Study Director
NCT00249041	MD	Study Director
NCT00249912	Medical Director	Study Director
NCT00250276	GSK Clinical Trials	Study Director
NCT00250419	Medical Monitor	Study Director
NCT00250432	Medical Monitor	Study Director
NCT00250458	Medical Monitor	Study Director
NCT00250601	Clinical Sciences & Operations	Study Director
NCT00250653	Clinical Sciences & Operations	Study Director
NCT00250679	Sepracor Medical Director	Study Director
NCT00251004	Novartis	Study Director
NCT00251030	Pfizer CT.gov Call Center	Study Director
NCT00251680	Medical Director	Study Director
NCT00251693	Medical Director	Study Chair
NCT00251719	Medical Director	Study Director
NCT00251745	Medical Director	Study Director
NCT00251758	Medical Director	Study Director
NCT00252330	ICD CSD	Study Director
NCT00252343	ICD CSD	Study Director
NCT00252356	ICD CSD	Study Director
NCT00253903	ICD CSD	Study Director
NCT00253968	ICD	Study Director
NCT00254046	Tibotec Pharmaceuticals Clinical Trial	Study Director
NCT00254293	Bristol-Myers Squibb	Study Director
NCT00255047	Medical Director	Study Director
NCT00255099	Tibotec Pharmaceuticals Clinical Trial	Study Director
NCT00255151	Medical Director	Study Chair
NCT00255164	Medical Director	Study Director
NCT00255190	Medical Director	Study Director
NCT00256750	Bristol-Myers Squibb	Study Director
NCT00256854	GSK Clinical Trials	Study Director
NCT00256867	GSK Clinical Trials, MD, PhD	Study Director
NCT00256880	GSK Clinical Trials	Study Director
NCT00256932	GSK Clinical Trials, MD	Study Director
NCT00257010	Janssen Ortho LLC Clinical Trial	Study Director
NCT00257166	Pfizer CT.gov Call Center	Study Director
NCT00257257	ICD CSD	Study Director
NCT00258557	Tibotec Pharmaceuticals Clinical Trial	Study Director
NCT00258817	Clinical Trials	Study Director
NCT00258830	Medical Director	Study Director
NCT00258856	Medical Monitor	Study Director
NCT00258895	Medical Director	Study Director
NCT00259012	Medical Monitor	Study Director
NCT00259012	Trial Manager	Principal Investigator
NCT00259012	Trial Manager	Principal Investigator
NCT00259012	Trial Manager	Principal Investigator
NCT00259012	Trial Manager	Principal Investigator
NCT00259012	Trial Manager	Principal Investigator
NCT00259012	Trial Manager	Principal Investigator
NCT00259012	Trial Manager	Principal Investigator
NCT00259129	Bayer Study Director	Study Director
NCT00259311	Call 1-877-CTLILLY (1-877-285-4559) or 1-317-615-4559 Mon-Fri 9 AM - 5 PM Eastern time (UTC/GMT - 5 hours, EST)	Study Director
NCT00259740	MD	Study Director
NCT00259870	GSK Clinical Trials	Study Director
NCT00259922	GSK Clinical Trials, MD	Study Director
NCT00259987	GSK Clinical Trials, MD	Study Director
NCT00260039	Medical Monitor	Study Director
NCT00260065	Eisai US Medical Services	Study Director
NCT00260156	Novartis Pharmaceuticals	Study Director
NCT00260832	Eisai Medical Services	Study Director
NCT00260923	Novartis Pharmaceuticals	Study Director
NCT00261365	Bristol-Myers Squibb	Study Director
NCT00261443	Bristol-Myers Squibb	Study Director
NCT00261833	Senior Director Immonology & Pulmonology, Clinical R&D	Study Director
NCT00261846	Pfizer CT.gov Call Center	Study Director
NCT00261950	MD	Study Director
NCT00262028	Novartis Vaccines	Study Chair
NCT00262236	Novartis Pharmaceutical	Study Director
NCT00262483	Medical Monitor	Study Director
NCT00262600	Boehringer Ingelheim	Study Chair
NCT00262990	Novartis Pharmaceuticals	Study Director
NCT00263068	UCB Clinical Trial Call Center	Study Director
NCT00263276	Bristol Myers Squibb	Study Director
NCT00263328	Pfizer CT.gov Call Center	Study Director
NCT00264147	Medical Monitor	Study Director
NCT00264537	Centocor, Inc. Clinical Trial	Study Director
NCT00264550	Centocor, Inc. Clinical Trial	Study Director
NCT00264576	Novartis Vaccines	Study Chair
NCT00264615	GSK Clinical Trials	Study Director
NCT00264875	Pfizer CT.gov Call Center	Study Director
NCT00264901	Global Clinical Registry (GCR, 1452)	Study Director
NCT00264914	ICD CSD	Study Director
NCT00265083	Centocor, Inc. Clinical Trial	Study Director
NCT00265096	Centocor, Inc. Clinical Trial	Study Director
NCT00265304	IDEA AG Clinical Trial	Study Director
NCT00265317	Pfizer CT.gov Call Center	Study Director
NCT00265330	Pfizer CT.gov Call Center	Study Director
NCT00265551	Medical Monitor	Study Director
NCT00266240	Clinical Trials	Study Director
NCT00266253	Clinical Trials	Study Director
NCT00266409	UCB Clinical Trial Call Center	Study Director
NCT00266604	Johnson & Johnson Pharmaceutical Research & Development, L.L. C. Clinical Trial	Study Director
NCT00266643	Call 1-877-CTLILLY (1-877-285-4559) or 1-317-615-4559 Mon-Fri 9 AM - 5 PM Eastern time UTC/GMT - 5 hours, EST	Study Director
NCT00266656	Call 1-877-CTLILLY (1-877-285-4559) or 1-317-615-4559 Mon-Fri 9 AM - 5 PM Eastern Time (UTC/GMT - 5 hrs)	Study Director
NCT00266877	Puma	Study Director
NCT00267020	Call 1-877-CTLILLY (1-877-285-4559) or 1-317-615-4559 Mon - Fri 9 AM - 5 PM Eastern time (UTC/GMT - 5 hours, EST)	Study Director
NCT00267202	Novartis	Study Chair
NCT00267254	Pfizer CT.gov Call Center	Study Director
NCT00267488	GSK Clinical Trials	Study Director
NCT00267748	Pfizer CT.gov Call Center	Study Director
NCT00267956	Centocor, Inc. Clinical Trial	Study Director
NCT00267969	Centocor Research & Development, Inc. Clinical Trial	Study Director
NCT00268892	Clinical Development Support	Study Director
NCT00268905	Eisai US Medical Services	Study Director
NCT00268957	Medical Monitor	Study Director
NCT00269048	GSK Clinical Trials	Study Director
NCT00269204	Medical Monitor	Study Director
NCT00269217	Medical Monitor	Study Director
NCT00269477	Medical Monitor	Study Director
NCT00269516	Global Clinical Director Solvay	Study Director
NCT00271817	Medical Monitor	Study Director
NCT00272779	Bristol-Myers Squibb	Study Director
NCT00272935	Duramed Research Protocol Chair	Study Chair
NCT00273039	GSK Clinical Trials	Study Director
NCT00273052	GSK Clinical Trials	Study Director
NCT00273299	Novartis Pharmaceuticals	Study Director
NCT00273312	Novartis Pharmaceuticals	Study Director
NCT00274690	GSK Clinical Trials	Study Director
NCT00274716	Medical Monitor	Study Director
NCT00275197	Pfizer CT.gov Call Center	Study Director
NCT00275236	UCB Clinical Trial Call Center	Study Director
NCT00276094	Shionogi Clinical Trials Administrator Clinical Support Help Line	Study Director
NCT00276458	Medical Monitor	Study Director
NCT00276484	Medical Monitor	Study Director
NCT00277212	Bristol-Myers Squibb	Study Director
NCT00277238	Pfizer CT.gov Call Center	Study Director
NCT00277472	Novartis 862-778-8300 Pharmaceuticals	Study Director
NCT00277498	Pfizer CT.gov Call Center	Study Director
NCT00277810	Medical Monitor	Study Director
NCT00277810	Trial Manager	Principal Investigator
NCT00277810	Trial Manager	Principal Investigator
NCT00277810	Trial Manager	Principal Investigator
NCT00277810	Trial Manager	Principal Investigator
NCT00277810	Trial Manager	Principal Investigator
NCT00277810	Trial Manager	Principal Investigator
NCT00277810	Trial Manager	Principal Investigator
NCT00277810	Trial Manager	Principal Investigator
NCT00277810	Trial Manager	Principal Investigator
NCT00277823	Medical Monitor	Study Director
NCT00277914	Boehringer Ingelheim	Study Chair
NCT00278941	AstraZeneca Seroquel Medical Science Director, MD	Study Director
NCT00279201	Call 1-877-CTLILLY (1-877-285-4559) or 1-317-615-4559 Mon-Fri 9 AM - 5 PM Eastern time (UTC/GMT - 5 hours, EST)	Study Director
NCT00279214	Call 1-877-CTLILLY (1-877-285-4559) or 1-317-651-4559 Mon - Fri 9 AM - 5 PM Eastern time (UTC/GMT - 5 hours, EST)	Study Director
NCT00280423	GSK Clinical Trials	Study Director
NCT00280436	GSK Clinical Trials	Study Director
NCT00280540	Novartis Pharmaceuticals	Study Director
NCT00280566	Pfizer CT.gov Call Center	Study Director
NCT00280995	Medical Monitor	Study Director
NCT00281008	Medical Monitor	Study Director
NCT00281554	Use Central Contact	Study Director
NCT00281580	Boehringer Ingelheim	Study Chair
NCT00281593	Boehringer Ingelheim	Study Chair
NCT00281632	GSK Clinical Trials, MD	Study Director
NCT00282048	Pfizer CT.gov Call Center	Study Director
NCT00282295	GSK Clinical Trials	Study Director
NCT00282464	Pfizer CT.gov Call Center	Study Director
NCT00282919	Pfizer CT.gov Call Center	Study Director
NCT00282984	Pfizer CT.gov Call Center	Study Director
NCT00282997	Pfizer CT.gov Call Center	Study Director
NCT00283439	MD	Study Director
NCT00284128	Clinical Sciences & Operations	Study Director
NCT00284141	ICD CSD	Study Director
NCT00284804	Medarex Medical Monitor	Study Director
NCT00285012	Pfizer CT.gov Call Center	Study Director
NCT00286091	MD	Study Director
NCT00286429	VP Biological Sciences	Study Director
NCT00286442	VP Biological Sciences	Study Director
NCT00286455	VP Biological Sciences	Study Director
NCT00286468	VP Biological Sciences	Study Director
NCT00286481	Medical Director	Study Director
NCT00286494	VP Biological Sciences	Study Director
NCT00288236	ICD CSD	Study Director
NCT00288431	Medical Director	Study Director
NCT00288652	Pfizer CT.gov Call Center	Study Director
NCT00289185	GSK Clinical Trials	Study Director
NCT00289198	GSK Clinical Trials	Study Director
NCT00289627	Bristol-Myers Squibb	Study Director
NCT00289783	GSK Clinical Trials	Study Director
NCT00289874	Medical Monitor	Study Director
NCT00289887	Medical Monitor	Study Director
NCT00289900	Medical Monitor	Study Director
NCT00289913	Medical Monitor	Study Director
NCT00290563	Medical Monitor	Study Director
NCT00290901	Pfizer CT.gov Call Center	Study Director
NCT00291187	Vanda Pharmaceuticals	Study Director
NCT00291330	Boehringer Ingelheim	Study Chair
NCT00291356	GSK Clinical Trials	Study Director
NCT00291577	Pfizer CT.gov Call Center	Study Director
NCT00291928	GSK Clinical Trials	Study Director
NCT00292227	UCB Clinical Trial Call Center	Study Director
NCT00292981	Program Director	Study Director
NCT00293059	Bayer Study Director	Study Director
NCT00293254	Medical Monitor	Study Director
NCT00293813	MD	Study Director
NCT00293826	MD	Study Director
NCT00294047	GSK Clinical Trials	Study Director
NCT00294086	Novartis Pharmaceuticals	Study Director
NCT00294515	Clinical Trials	Study Chair
NCT00294710	Novartis Pharmaceuticals	Principal Investigator
NCT00294736	Medical Monitor	Study Director
NCT00295282	Bristol-Myers Squibb	Study Director
NCT00295633	Bristol-Myers Squibb	Study Director
NCT00295750	Clinical Development Support	Study Director
NCT00295763	Medical Monitor	Study Director
NCT00295815	Call 1-877-CTLILLY (1-877-285-4559) or 1-317-615-4559 Mon-Fri 9AM - 5PM Eastern time (UTC/GMT - 5 hours, EST)	Study Director
NCT00296127	Pfizer CT.gov Call Center	Study Director
NCT00296374	AstraZeneca Crestor Medical Science Director, MD	Study Director
NCT00296400	AstraZeneca Crestor Medical Science Director, MD	Study Director
NCT00296465	Clinical Development Support	Study Director
NCT00296478	Clinical Development Support	Study Director
NCT00296491	GSK Clinical Trials	Study Director
NCT00296530	GSK Clinical Trials	Study Director
NCT00296569	Medical Monitor	Study Director
NCT00297167	Aptalis Medical Information	Study Director
NCT00297180	GSK Clinical Trials	Study Director
NCT00297817	Novartis Vaccines - Drug Information Services	Study Chair
NCT00298623	GSK Clinical Trials	Study Director
NCT00298675	Clinical Sciences & Operations	Study Director
NCT00298766	Medical Monitor	Study Director
NCT00298987	Bristol-Myers Squibb	Study Director
NCT00299130	Clinical Trials	Study Director
NCT00299494	Pfizer CT.gov Call Center	Study Director
NCT00299507	Alcon Investigators	Principal Investigator
NCT00299546	Centocor, Inc. Clinical Trial	Study Director
NCT00299702	Johnson & Johnson Pharmaceutical Research & Development, L.L. C. Clinical Trial	Study Director
NCT00299715	Johnson & Johnson Pharmaceutical Research & Development, L.L. C. Clinical Trial	Study Director
NCT00299871	ICD CSD	Study Director
NCT00300274	Novartis	Study Director
NCT00300339	ICD CSD	Study Director
NCT00300677	Pfizer CT.gov Call Center	Study Director
NCT00300755	Medical Monitor	Study Director
NCT00301236	Novartis Pharmaceuticals	Study Chair
NCT00302471	Medical Monitor	Study Director
NCT00303056	Clinical Sciences & Operations	Study Director
NCT00303069	Medical Monitor	Study Director
NCT00303251	Novartis Pharmaceuticals	Study Director
NCT00303472	MD	Study Director
NCT00303485	Clinical Trials	Study Director
NCT00303498	Pfizer CT.gov Call Center	Study Director
NCT00303563	Clinical Trials	Study Director
NCT00303589	Clinical Trials	Study Director
NCT00303602	Call 1-877-CTLILLY (1-877-285-4559) or 1-317-615-4559 Mon - Fri 9 AM to 5 PM Eastern Time (UTC/GMT - 5 hours, EST)	Study Director
NCT00304525	Novartis Pharmaceuticals	Study Director
NCT00304525	Novartis Pharmaceuticals	Study Director
NCT00305188	Clinical Sciences & Operations	Study Director
NCT00305604	Medical Monitor	Study Director
NCT00305903	Novartis	Study Chair
NCT00306254	Pfizer CT.gov Call Center	Study Director
NCT00306293	GSK Clinical Trials	Study Director
NCT00306384	VP Biological Sciences	Study Director
NCT00306592	Medical Director	Study Director
NCT00306787	Novartis Pharmaceuticals	Study Director
NCT00307021	GSK Clinical Trials	Study Director
NCT00307437	Centocor, Inc. Clinical Trial	Study Director
NCT00307749	Professor	Principal Investigator
NCT00308503	ICD CSD	Study Director
NCT00308581	UCB Clinical Trial Call Center	Study Director
NCT00308750	Call 1-877-CTLILLY (1-877-285-4559) or 317-615-4559 Mon - Fri 9 AM - 5 PM Eastern time (UTC/GMT - 5 hours, EST)	Study Director
NCT00309049	Bristol-Myers Squibb	Study Director
NCT00309140	Call 1-877-CTLILLY (1-877-285-4559) or 1-317-615-4559 Mon - Fri 9 AM - 5 PM Eastern time (UTC/GMT - 5 hours, EST)	Study Director
NCT00309686	Johnson & Johnson Pharmaceutical Research & Development, L.L. C. Clinical Trial	Study Director
NCT00309699	Johnson & Johnson Pharmaceutical Research & Development, L.L. C. Clinical Trial	Study Director
NCT00310375	GSK Clinical Trials	Study Director
NCT00310544	Bayer Study Director	Study Director
NCT00310817	Novartis Vaccines - Drug Information Services	Study Chair
NCT00311090	ICD CSD	Study Director
NCT00311363	GSK Clinical Trials	Study Director
NCT00311376	Medical Director	Study Director
NCT00312130	Novartis Pharmaceuticals	Study Director
NCT00312182	Pfizer CT.gov Call Center	Study Director
NCT00312377	Contact-US@sanofi.com	Study Director
NCT00312494	Pfizer CT.gov Call Center	Study Director
NCT00312845	Medical Monitor	Study Director
NCT00312858	Medical Monitor	Study Director
NCT00313001	Global Clinical Registry (GCR, 1452)	Study Director
NCT00313248	Bayer Study Director	Study Director
NCT00313300	Bristol-Myers Squibb	Study Director
NCT00313781	Pfizer CT.gov Call Center	Study Director
NCT00314054	Medical Monitor	Study Director
NCT00314782	AstraZeneca Emerging Oncology Medical Science Director, MD	Study Director
NCT00314860	GSK Clinical Trials	Study Director
NCT00314951	Medical Director	Study Director
NCT00314964	Pfizer CT.gov Call Center	Study Director
NCT00315705	Medical Monitor	Study Director
NCT00315757	GSK Clinical Trials	Study Chair
NCT00316082	Bristol-Myers Squibb	Study Director
NCT00316173	GSK Clinical Trials	Study Director
NCT00316186	GSK Clinical Trials	Study Director
NCT00316225	Call 1-877-CTLILLY (1-877-285-4559) or 1-317-615-4559 Mon - Fri 9 AM - 5 PM Eastern time (UTC/GMT - 5 hours, EST)	Study Director
NCT00316706	GSK Clinical Trials	Study Director
NCT00316758	Clinical Trials	Study Director
NCT00316771	Clinical Trials	Study Director
NCT00316992	Medical Director Clinical Science	Study Director
NCT00317044	AstraZeneca Nexium Medical Science Director, MD	Study Director
NCT00317395	ICD CSD	Study Director
NCT00317642	Medical Monitor	Study Director
NCT00318448	ICD CSD	Study Director
NCT00318500	Medical Monitor	Study Director
NCT00318500	Trial Manager	Principal Investigator
NCT00318500	Trial Manager	Principal Investigator
NCT00318500	Trial Manager	Principal Investigator
NCT00318500	Trial Manager	Principal Investigator
NCT00318500	Trial Manager	Principal Investigator
NCT00319163	Medical Monitor	Study Director
NCT00319254	Pfizer CT.gov Call Center	Study Director
NCT00319501	Pfizer CT.gov Call Center	Study Director
NCT00319553	Medical Director	Study Director
NCT00320255	Bristol-Myers Squibb	Study Director
NCT00320385	GSK Clinical Trials	Study Director
NCT00320489	Call 1-877-CTLILLY (1-877-285-4559) or 1-317-615-4559 Mon - Fri 9 AM - 5 PM Eastern time (UTC/GMT- 5 hours, EST)	Study Director
NCT00320541	Call 1-877-CTLILLY (1-877-285-4559) or 1-317-615-4559 Mon - Fri 9 AM - 5 PM Eastern time (UTC/GMT - 5 hours, EST)	Study Director
NCT00320710	Novartis Pharmaceuticals	Study Director
NCT00320788	Clinical Trial Management	Study Director
NCT00321464	MD	Study Director
NCT00321477	GSK Clinical Trials	Study Director
NCT00321516	Bristol-Myers Squibb	Study Director
NCT00321620	MD	Study Director
NCT00321711	MD	Study Director
NCT00321737	Medical Director	Study Chair
NCT00321815	Pfizer CT.gov Call Center	Study Director
NCT00321854	Boehringer Ingelheim	Study Chair
NCT00321984	Medical Director	Study Director
NCT00322231	Medical Monitor	Study Director
NCT00322361	Medical Monitor	Study Director
NCT00322400	MD	Study Director
NCT00322517	Pfizer CT.gov Call Center	Study Director
NCT00322556	Program Coordinator	Study Director
NCT00323297	Pfizer CT.gov Call Center	Study Director
NCT00323622	GSK Clinical Trials	Study Director
NCT00323882	Bristol-Myers Squibb	Study Director
NCT00324155	Bristol-Myers Squibb	Study Director
NCT00324974	Medical Director	Study Director
NCT00325130	Medical Monitor	Study Director
NCT00325195	Medical Director, MD	Study Director
NCT00325351	Bayer Study Director	Study Director
NCT00325364	Call 1-877-CTLILLY (1-877-285-4559) or 1-317-615-4559 Mon - Fri 9 AM - 5 PM Eastern Time (UTC/GMT - 5 hours, EST)	Study Director
NCT00325468	MD	Study Director
NCT00325689	Bristol-Myers Squibb	Study Director
NCT00325728	Medical Director Clinical Science	Study Director
NCT00326105	Seroquel Medical Science Director, MD	Study Director
NCT00326144	Seroquel Medical Science Director, MD	Study Director
NCT00326183	Medical Monitor	Study Director
NCT00326248	GSK Clinical Trials	Study Director
NCT00326287	Johnson & Johnson Pharmaceutical Research & Development, L.L. C. Clinical Trial	Study Director
NCT00326300	McNeil Consumer & Specialty Pharmaceuticals Clinical Trial	Study Director
NCT00326326	Pfizer CT.gov Call Center	Study Director
NCT00326391	McNeil Consumer & Specialty Pharmaceuticals, a Division of Mc Neil-PPC, Inc. Clinical Trial	Study Director
NCT00326586	Bristol-Myers Squibb	Study Director
NCT00326716	Bristol-Myers Squibb	Study Director
NCT00326963	Clinical Trials	Study Director
NCT00327015	Bristol-Myers Squibb	Study Director
NCT00327145	Novartis Pharmaceuticals	Study Chair
NCT00327171	ICD CSD	Study Director
NCT00327379	Bayer Study Director	Study Director
NCT00327535	Clinical Trials	Study Director
NCT00327587	Novartis Pharmaceuticals	Principal Investigator
NCT00327743	ICD	Study Director
NCT00328172	Boehringer Ingelheim	Study Chair
NCT00328198	Medical Monitor	Study Director
NCT00328627	VP Biological Sciences	Study Director
NCT00329004	Bristol-Myers Squibb	Study Director
NCT00329082	Call 1-877-CTLILLY (1-877-285-4559) or 1-317-615-4559 Mon-Fri 9 AM - 5 PM Eastern Time (UTC/GMT - 5 hours, EST)	Study Director
NCT00329147	Medical Monitor	Study Director
NCT00329186	Medical Monitor	Study Director
NCT00329238	Boehringer Ingelheim	Study Chair
NCT00329355	GSK Clinical Trials	Study Director
NCT00329459	GSK Clinical Trials	Study Director
NCT00329628	Bayer Study Director	Study Director
NCT00329849	Novartis Vaccines & Diagnostics -	Study Chair
NCT00329901	Novartis Vaccines - Information Services	Study Chair
NCT00330395	Medical Monitor	Study Director
NCT00330460	MD	Study Director
NCT00330473	Call 1-877-CTLILLY (1-877-285-4559) or 1-317-615-4559 Mon - Fri 9 AM - 5 PM Eastern time (UTC/GMT - 5 hours, EST)	Study Director
NCT00330759	MD	Study Director
NCT00331175	Pfizer CT.gov Call Center	Study Director
NCT00332020	Bayer Study Director	Study Director
NCT00332163	MD	Study Director
NCT00332202	Call 1-877-CTLILLY (1-877-285-4559) or 1-317-615-4559 Mon - Fri 9 AM - 5 PM Eastern time (UTC/GMT - 5 hours, EST)	Study Director
NCT00332241	Bristol-Myers Squibb	Study Director
NCT00332761	Pfizer CT.gov Call Center	Study Director
NCT00332917	Global Clinical Director Solvay	Study Director
NCT00333112	Astellas US Medical Information	Study Director
NCT00333151	Global Clinical Registry (GCR, 1452)	Study Director
NCT00333281	Call 1-877-CTLILLY (1-877-285-4559) or 1-317-615-4559 Mon - Fri 9 AM - 5 PM Eastern time (UTC/GMT - 5 hours, EST)	Study Director
NCT00333359	GSK Clinical Trials	Study Director
NCT00333788	UCB Clinical Trial Call Center	Study Director
NCT00333814	Medical Director	Study Director
NCT00333866	Pfizer CT.gov Call Center	Study Director
NCT00334126	Johnson & Johnson Pharmaceutical Research & Development, L.L. C. Clinical Trial	Study Director
NCT00334152	GSK Clinical Trials	Study Director
NCT00334282	GSK Clinical Trials	Study Director
NCT00334607	GSK Clinical Trials	Study Director
NCT00335166	Global Clinical Director Solvay	Study Director
NCT00335374	Global Clinical Director Solvay	Study Director
NCT00336479	Medical Monitor	Study Director
NCT00336492	Centocor, Inc. Clinical Trial	Study Director
NCT00336713	Clinical Sciences & Operations	Study Director
NCT00337493	Clinical Trials	Study Director
NCT00337571	Bristol-Myers Squibb	Study Director
NCT00337610	Medical Monitor	Study Director
NCT00337662	Call 1-877-CTLILLY (1-877-285-4559) or 1-317-615-4559 Mon - Fri 9 AM - 5 PM Eastern time (UTC/GMT - 5 hours, EST)	Study Director
NCT00337675	Medical Monitor	Study Director
NCT00337701	Clinical Trials	Study Director
NCT00337727	Medical Monitor	Study Director
NCT00337935	Johnson & Johnson Pharmaceutical Research & Development, L.L. C. Clinical Trial	Study Director
NCT00338130	AZD6244 Medical Science Director, MD	Study Director
NCT00338884	Pfizer CT.gov Call Center	Study Director
NCT00339183	MD	Study Director
NCT00339872	Medical Monitor	Study Director
NCT00340327	Medical Monitor	Study Director
NCT00340834	Novartis Pharmaceuticals	Study Director
NCT00343200	Pfizer CT.gov Call Center	Study Director
NCT00343252	Call 1-877-CTLILLY (1-877-285-4559) or 1-317-615-4559 Mon - Fri 9 AM - 5 PM Eastern time (UTC/GMT -5 hours, EST)	Study Director
NCT00343291	Call 1-877-CTLILLY (1-877-285-4559) or 1-317-615-4559 Mon - Fri 9 AM - 5 PM Eastern time (UTC/GMT - 5 hours, EST)	Study Director
NCT00345189	Biogen Idec Medical Monitor, MD	Study Director
NCT00345579	GSK Clinical Trials	Study Director
NCT00345618	ICD CSD	Study Director
NCT00345683	GSK Clinical Trials	Study Director
NCT00345839	MD	Study Director
NCT00346034	Pfizer CT.gov Call Center	Study Director
NCT00346073	GSK Clinical Trials	Study Director
NCT00346216	Pfizer CT.gov Call Center	Study Director
NCT00346775	GSK Clinical Trials	Study Director
NCT00347360	GSK Clinical Trials, M.D.	Study Director
NCT00347425	Global Clinical Director Solvay	Study Director
NCT00347919	GSK Clinical Trials	Study Director
NCT00347958	Clinical Trials	Study Director
NCT00348140	GSK Clinical Trials	Study Director
NCT00348309	GSK Clinical Trials	Study Director
NCT00348374	Pfizer CT.gov Call Center	Study Director
NCT00348491	Novartis Pharmaceuticals	Study Director
NCT00349336	Clinical Trials	Study Director
NCT00349349	GSK Clinical Trials	Study Director
NCT00349531	Boehringer Ingelheim	Study Chair
NCT00350051	Bayer Study Director	Study Director
NCT00350103	UCB Clinical Trial Call Center	Study Director
NCT00350168	Novartis Pharmaceuticals	Study Director
NCT00350207	Boehringer Ingelheim	Study Chair
NCT00350727	GSK Clinical Trials	Study Director
NCT00350779	Medical Monitor	Study Director
NCT00351104	PPD	Principal Investigator
NCT00351468	Novartis Pharmaceuticals	Study Director
NCT00351884	Novartis Pharmaceuticals	Study Director
NCT00352625	PPD	Principal Investigator
NCT00353262	Clinical Trials	Study Director
NCT00353418	Clinical Trials	Study Director
NCT00353496	Medical Director, Endocrinology	Study Director
NCT00353522	Clinical Trials	Study Director
NCT00353912	Novartis Pharmaceuticals	Study Director
NCT00354536	GSK Clinical Trials	Study Director
NCT00354627	Tibotec Pharmaceuticals Clinical Trial	Study Director
NCT00354809	GSK Clinical Trials	Study Director
NCT00354965	GSK Clinical Trials	Study Director
NCT00355082	GSK Clinical Trials	Study Director
NCT00355121	Medical Director	Study Director
NCT00355134	Novartis Pharmaceuticals	Study Chair
NCT00355238	Bristol-Myers Squibb	Study Director
NCT00355524	Tibotec Pharmaceuticals Limited, Ireland Clinical Trial	Study Director
NCT00355615	Crestor Medical Science Director, MD	Study Director
NCT00355641	GSK Clinical Trials	Study Director
NCT00355849	Call 1-877-CTLILLY (1-877-285-4559) or 1-317-615-4559 Mon-Fri 9 AM - 5 PM Eastern Time (UTC/GMT - 5 hours, EST)	Study Director
NCT00356109	Call 1-877-CTLILLY (1-877-285-4559) or 1-317-615-4559 Mon - Fri 9 AM - 5 PM Eastern Time (UTC/GMT - 5 hours, EST)	Study Director
NCT00356135	Call 1-877-CTLILLY (1-877-285-4559) or 317-615-4559 Mon - Fri 9 am - 5 pm Eastern time (UTC/GMT - 5 hours, EST)	Study Director
NCT00356408	UCB Clinical Trial Call Center	Study Director
NCT00356460	Medical Monitor	Study Director
NCT00356915	GSK Clinical Trials	Study Director
NCT00357188	Bristol-Myers Squibb	Study Director
NCT00357240	Bristol-Myers Squibb	Study Director
NCT00357370	Bristol-Myers Squibb	Study Director
NCT00357604	Bristol-Myers Squibb	Study Director
NCT00357721	Bristol-Myers Squibb	Study Director
NCT00357825	Pfizer CT.gov Call Center	Study Director
NCT00357968	Call 1-877-CTLILLY (1-877-285-4559) or 1-317-615-4559 Mon - Fri 9 AM - 5 PM Eastern time (UTC/GMT - 5 hours, EST)	Study Director
NCT00358150	Medical Monitor	Study Director
NCT00358215	MD	Study Director
NCT00358358	GSK Clinical Trials	Study Director
NCT00358449	GSK Clinical Trials	Study Director
NCT00358540	GSK Clinical Trials	Study Director
NCT00358631	ICD CSD	Study Director
NCT00358644	Eisai US Medical Services	Study Director
NCT00358878	ICD	Study Director
NCT00359021	Tibotec Pharmaceuticals Clinical Trial	Study Director
NCT00359619	GSK Clinical Trials	Study Director
NCT00359788	Boehringer Ingelheim	Study Chair
NCT00359944	Medical Director, MD	Study Director
NCT00359983	GSK Clinical Trials	Study Director
NCT00360100	Pfizer CT.gov Call Center	Study Director
NCT00360230	GSK Clinical Trials	Study Director
NCT00360243	Boehringer Ingelheim	Study Chair
NCT00360490	Bayer Study Director	Study Director
NCT00360529	Sprout Pharmaceuticals	Study Chair
NCT00360555	Boehringer Ingelheim	Study Chair
NCT00361101	Medical Monitor	Study Director
NCT00361153	Director Clinical Development	Study Director
NCT00361335	Centocor, Inc. Clinical Trial	Study Director
NCT00361348	MD	Study Director
NCT00361504	Johnson & Johnson Pharmaceutical Research & Development, L.L. C. Clinical Trial	Study Director
NCT00361569	Duramed Protocol Chair	Study Chair
NCT00361582	Johnson & Johnson Pharmaceutical Research & Development, L.L. C. Clinical Trial	Study Director
NCT00361634	MD	Study Director
NCT00361790	Bristol-Myers Squibb	Study Director
NCT00361894	Bayer Study Director	Study Director
NCT00362115	VP Clinical Science Strategy	Study Director
NCT00362232	Bayer Study Director	Study Director
NCT00362271	Bristol-Myers Squibb	Study Director
NCT00362479	Duramed Medical Monitor	Principal Investigator
NCT00362609	Medical Monitor	Study Director
NCT00362609	Trial Manager	Principal Investigator
NCT00362609	Trial Manager	Principal Investigator
NCT00362609	Trial Manager	Principal Investigator
NCT00362609	Trial Manager	Principal Investigator
NCT00362609	Trial Manager	Principal Investigator
NCT00362609	Trial Manager	Principal Investigator
NCT00362609	Trial Manager	Principal Investigator
NCT00362609	Trial Manager	Principal Investigator
NCT00362609	Trial Manager	Principal Investigator
NCT00362713	Bristol-Myers Squibb	Study Director
NCT00362726	Bristol-Myers Squibb	Study Director
NCT00362830	Bristol-Myers Squibb	Study Director
NCT00363051	Novartis Pharmaceuticals	Study Director
NCT00363142	GSK Clinical Trials	Study Director
NCT00363194	GSK Clinical Trials, MD	Study Director
NCT00363311	GSK Clinical Trials	Study Director
NCT00363415	Call 1-877-CTLILLY(1-877-285-4559) or 1-317-615-4559 Mon - Fri 9 AM - 5 PM Eastern time (UTC/GMT - 5 hours, EST)	Study Director
NCT00363870	GSK Clinical Trials	Study Director
NCT00364013	MD	Study Director
NCT00364182	Pfizer CT.gov Call Center	Study Director
NCT00364546	Johnson & Johnson Pharmaceutical Research & Development, L.L. C. Clinical Trial	Study Director
NCT00364793	Bristol-Myers Squibb	Study Director
NCT00365300	Medical Monitor	Study Director
NCT00365339	Bristol-Myers Squibb	Study Director
NCT00365352	GSK Clinical Trials	Study Director
NCT00365560	Boehringer Ingelheim Study Coordinator	Study Chair
NCT00365586	PPD	Principal Investigator
NCT00365859	Bristol-Myers Squibb	Study Director
NCT00366002	Novartis Pharmaceutical Corporation	Study Chair
NCT00366171	Medical Monitor	Study Director
NCT00366249	Medical Monitor	Study Director
NCT00366249	Trial Manager	Principal Investigator
NCT00366249	Trial Manager	Principal Investigator
NCT00366249	Trial Manager	Principal Investigator
NCT00366249	Trial Manager	Principal Investigator
NCT00366249	Trial Manager	Principal Investigator
NCT00366249	Trial Manager	Principal Investigator
NCT00366249	Trial Manager	Principal Investigator
NCT00366249	Trial Manager	Principal Investigator
NCT00366249	Trial Manager	Principal Investigator
NCT00366249	Trial Manager	Principal Investigator
NCT00366249	Trial Manager	Principal Investigator
NCT00366249	Trial Manager	Principal Investigator
NCT00366249	Trial Manager	Principal Investigator
NCT00366249	Trial Manager	Principal Investigator
NCT00366249	Trial Manager	Principal Investigator
NCT00366249	Trial Manager	Principal Investigator
NCT00366249	Trial Manager	Principal Investigator
NCT00366249	Trial Manager	Principal Investigator
NCT00366249	Trial Manager	Principal Investigator
NCT00366249	Trial Manager	Principal Investigator
NCT00366249	Trial Manager	Principal Investigator
NCT00366249	Trial Manager	Principal Investigator
NCT00366249	Trial Manager	Principal Investigator
NCT00366249	Trial Manager	Principal Investigator
NCT00366249	Trial Manager	Principal Investigator
NCT00366249	Trial Manager	Principal Investigator
NCT00366249	Trial Manager	Principal Investigator
NCT00366249	Trial Manager	Principal Investigator
NCT00366249	Trial Manager	Principal Investigator
NCT00366249	Trial Manager	Principal Investigator
NCT00366249	Trial Manager	Principal Investigator
NCT00366249	Trial Manager	Principal Investigator
NCT00366262	Medical Monitor	Study Director
NCT00366340	Medical Monitor	Study Director
NCT00366340	Trial Manager	Principal Investigator
NCT00366379	Clinical Trials	Study Director
NCT00366522	Medical Monitor	Study Director
NCT00366548	Medical Monitor	Study Director
NCT00366548	Trial Manager	Principal Investigator
NCT00366600	Puma	Study Director
NCT00366652	Medical Monitor	Study Director
NCT00366678	Medical Monitor	Study Director
NCT00366678	Trial Manager	Principal Investigator
NCT00366834	GSK Clinical Trials	Study Director
NCT00366899	Medical Monitor	Study Director
NCT00366899	Trial Manager	Principal Investigator
NCT00367120	Pfizer CT.gov Call Center	Study Director
NCT00367445	Pfizer CT.gov Call Center	Study Director
NCT00367536	Medical Monitor	Study Director
NCT00367614	Medical Monitor	Study Director
NCT00367653	Pfizer CT.gov Call Center	Study Director
NCT00367679	GSK Clinical Trials	Study Director
NCT00367887	Pfizer CT.gov Call Center	Study Director
NCT00368251	UCB Clinical Trial Call Center	Study Director
NCT00368277	Novartis Pharmaceuticals	Study Director
NCT00368368	Clinical Trials	Study Director
NCT00368576	GSK Clinical Trials	Study Director
NCT00368966	Medical Monitor	Study Director
NCT00368966	Trial Manager	Principal Investigator
NCT00369304	Medical Monitor	Study Director
NCT00369343	Medical Monitor	Study Director
NCT00369382	Pfizer CT.gov Call Center	Study Director
NCT00369434	Medical Monitor	Study Director
NCT00369473	MD	Study Director
NCT00369824	GSK Clinical Trials	Study Director
NCT00369941	Medical Monitor	Study Director
NCT00370032	GSK Clinical Trials	Study Director
NCT00370331	GSK Clinical Trials	Study Director
NCT00370435	GSK Clinical Trials	Study Director
NCT00370513	GSK Clinical Trials	Study Director
NCT00370552	Bristol-Myers Squibb	Study Director
NCT00371150	Bristol-Myers Squibb	Study Director
NCT00371254	Bristol-Myers Squibb	Study Director
NCT00371345	Bristol-Myers Squibb	Study Director
NCT00371566	GSK Clinical Trials, MD, PhD	Study Director
NCT00371683	Bristol-Myers Squibb	Study Director
NCT00372424	Pfizer CT.gov Call Center	Study Director
NCT00372476	Novartis Pharmaceuticals	Study Director
NCT00372476	Novartis Pharmaceuticals	Study Director
NCT00372775	Pfizer CT.gov Call Center	Study Director
NCT00372788	Emerging Oncology Medical Science Director, MD	Study Director
NCT00372944	Emerging Oncology Medical Science Director, MD	Study Director
NCT00373256	Pfizer CT.gov Call Center	Study Director
NCT00373425	Medical Monitor	Study Director
NCT00373529	Medical Monitor	Study Director
NCT00373542	GSK Clinical Trials	Study Director
NCT00373685	Pfizer CT.gov Call Center	Study Director
NCT00373958	Medical Monitor	Study Director
NCT00374166	Clinical Sciences & Operations	Study Director
NCT00374322	GSK Clinical Trials	Study Director
NCT00374855	Call 1-877-CTLILLY (1-877-285-4559) or 1-317-615-4559 Mon-Fri 9AM-5PM Eastern time (UTC/GMT - 5 hours, EST	Study Director
NCT00374868	Call 1-877-CTLILLY (1-877-285-4559) Mon - Fri 9 AM - 5 PM Eastern Time (UTC/GMT - 5 hours, EST)	Study Director
NCT00374907	Bristol-Myers Squibb	Study Director
NCT00375284	Boehringer Ingelheim	Study Chair
NCT00375505	Novartis Pharmaceuticals	Study Director
NCT00375505	Novartis Pharmaceuticals	Study Director
NCT00376038	GSK Clinical Trials	Study Director
NCT00376324	Medical Monitor	Study Director
NCT00376584	Medical Monitor	Study Director
NCT00376623	Boehringer Ingelheim	Study Chair
NCT00376896	GSK Clinical Trials, Dr	Study Director
NCT00377182	Clinical Trials	Study Director
NCT00377234	Clinical Trials	Study Director
NCT00377442	Clinical Trials	Study Director
NCT00377585	GSK Clinical Trials	Study Director
NCT00377611	GSK Clinical Trials	Study Director
NCT00377637	Clinical Trials	Study Director
NCT00377728	GSK Clinical Trials	Study Director
NCT00377819	MD	Study Director
NCT00377858	Call 1-877-CTLILLY (1-877-285-4559 or 1-317-615-4559 Mon-Fri 9 AM - 5 PM Eastern time (UTC/GMT - 5 hours, EST)	Study Director
NCT00378014	Novartis Pharmaceuticals	Study Director
NCT00378287	Janssen-Ortho Inc. Clinical Trial	Study Director
NCT00378833	Medical Monitor	Study Director
NCT00379756	GSK Clinical Trials	Study Director
NCT00379899	MD	Study Director
NCT00380211	GSK Clinical Trials	Study Director
NCT00380224	Medical Monitor	Study Director
NCT00380250	Medical Director, MD	Study Director
NCT00380302	ICD CSD	Study Director
NCT00380328	Puma	Study Director
NCT00380380	Novartis Pharmaceuticals	Study Director
NCT00380393	GSK Clinical Trials	Study Director
NCT00380445	Novartis Pharmaceuticals	Study Director
NCT00380744	Call 1-877-CTLILLY (1-877-285-4559) or 1-317-615-4559 Mon - Fri 9AM - 5PM Eastern time (UTC/GMT - 5 hours, EST)	Study Director
NCT00380900	Medical Monitor	Study Director
NCT00381238	GSK Clinical Trials	Study Director
NCT00381251	Trial Manager	Study Director
NCT00381303	Tibotec, Inc. Clinical Trial	Study Director
NCT00382096	Novartis Pharmaceuticals	Study Director
NCT00382304	Medical Monitor	Study Director
NCT00382408	Duramed Protocol Chair	Study Chair
NCT00382993	GSK Clinical Trials	Study Director
NCT00383123	GSK Clinical Trials	Study Director
NCT00383149	Bristol-Myers Squibb	Study Director
NCT00383162	GSK Clinical Trials	Study Director
NCT00383292	Call 1-877-CTLILLY (1-877-285-4559) or 1-317-615-4559 Mon - Fri 9 AM - 5 PM Eastern time (UTC/GMT - 5 hours, EST)	Study Director
NCT00383422	Call 1-877-CTLILLY (1-877-285-4559) or 1-317-615-4559 Mon - Fri 9 AM - 5 PM Eastern Time (UTC/GMT - 5 hours, EST)	Study Director
NCT00383513	UCB Clinical Trial Call Center	Study Director
NCT00383578	Novartis Pharmaceuticals	Study Director
NCT00383916	Medical Monitor	Study Director
NCT00384033	Pfizer CT.gov Call Center	Study Director
NCT00384059	Medical Monitor	Study Director
NCT00384059	Trial Manager	Principal Investigator
NCT00384072	Medical Monitor	Study Director
NCT00384072	Trial Manager	Principal Investigator
NCT00384072	Trial Manager	Principal Investigator
NCT00384085	Medical Affairs	Study Director
NCT00384280	Medical Monitor	Study Director
NCT00384358	Pfizer CT.gov Call Center	Study Director
NCT00384397	Medical Monitor	Study Director
NCT00384852	Medical Monitor	Study Director
NCT00384852	Trial Manager	Principal Investigator
NCT00384852	Trial Manager	Principal Investigator
NCT00384904	Bristol-Myers Squibb	Study Director
NCT00384917	Medical Monitor	Study Director
NCT00384930	Call 1-877-CTLILLY (1-877-285-4559) or 1-317-615-4559 Mon - Fri 9 AM - 5 PM Eastern time (UTC/GMT - 5 hours, EST)	Study Director
NCT00385008	GSK Clinical Trials	Study Director
NCT00385255	GSK Clinical Trials	Study Director
NCT00385307	ICD CSD	Study Director
NCT00385580	Bristol-Myers Squibb	Study Director
NCT00385671	Call 1-877-CTLILLY (1-877-285-4559) or 1-317-615-4559 Mon - Fri 9 AM - 5 PM Eastern Time (UTC/GMT - 5 hours, EST)	Study Director
NCT00385944	Call 1-877-CTLILLY (1-877-285-4559) or 1-317-615-4559 Mon - Fri 9 AM - 5 PM Eastern Time (UTC/GMT - 5 hours, EST)	Study Director
NCT00386009	Call 1-877-CTLILLY (1-877-285-4559) or 1-317-615-4559 Mon - Fri 9 AM - 5 PM Eastern time (UTC/GMT - 5 hours, EST)	Study Director
NCT00386087	Call 1-877-CTLILLY (1-877-285-4559) or 1-317-615-4559 Mon - Fri 9 AM - 5 PM Eastern Time(UTC/GMT - 5 Hours, EST)	Study Director
NCT00386100	GSK Clinical Trials	Study Director
NCT00386139	Novartis Pharmaceuticals	Study Director
NCT00386308	Clinical Development Support	Study Director
NCT00386334	Medical Director, CNS	Study Chair
NCT00386425	Call 1-877-CTLILLY (1-877-285-4559) or 1-317-615-4559 Mon-Fri 9 AM - 5 PM Eastern time (UTC/GMT - 5 hours, EST)	Study Director
NCT00386607	Novartis Pharmaceuticals	Study Director
NCT00387088	Boehringer Ingelheim	Study Chair
NCT00387127	GSK Clinical Trials	Study Director
NCT00387140	Medical Monitor	Study Director
NCT00387387	GSK Clinical Trials	Study Director
NCT00387517	Novartis Pharmaceuticals	Study Director
NCT00387764	GSK Clinical Trials	Study Director
NCT00387881	GSK Clinical Trials	Study Director
NCT00387946	Clinical Sciences & Operations	Study Director
NCT00388076	GSK Clinical Trials	Study Director
NCT00388518	Clinical Trials	Study Director
NCT00388557	Bristol-Myers Squibb	Study Director
NCT00388583	Medical Director	Study Director
NCT00388882	Boehringer Ingelheim	Study Chair
NCT00388986	Clinical Trials	Study Director
NCT00389155	Bristol-Myers Squibb	Study Director
NCT00389441	Pfizer CT.gov Call Center	Study Director
NCT00389532	Medical Director	Study Director
NCT00389857	Medical Director	Study Director
NCT00390039	Javelin Pharmaceuticals	Study Director
NCT00390533	Clinical Sciences & Operations	Study Director
NCT00390806	GSK Clinical Trials	Study Director
NCT00390884	Medical Director	Study Director
NCT00391027	Pfizer CT.gov Call Center	Study Director
NCT00391053	Medical Director	Study Director
NCT00391118	Call 1-877-CTLILLY (1-877-285-4559) or 1-317-615-4559 Mon - Fri 9 AM - 5 PM Eastern time (UTC/GMT - 5 hours, EST)	Study Director
NCT00391209	Call 1-877-CTLILLY (1-877-285-4559) or 1-317-615-4559 Mon - Fri 9 AM - 5 PM Eastern time (UTC/GMT - 5 hours, EST)	Study Director
NCT00391391	Medical Director	Study Director
NCT00392080	Pfizer CT.gov Call Center	Study Director
NCT00392288	ICD CSD	Study Director
NCT00393328	Bristol-Myers Squibb	Study Director
NCT00393822	MD	Study Director
NCT00393939	Pfizer CT.gov Call Center	Study Director
NCT00394030	GSK Clinical Trials	Study Director
NCT00394173	Novartis Pharmaceuticals Corp.	Study Chair
NCT00394277	Clinical Trials	Study Director
NCT00394563	Pfizer CT.gov Call Center	Study Director
NCT00394771	Duramed Medical Monitor	Principal Investigator
NCT00394836	GSK Clinical Trials	Study Director
NCT00395018	Bristol-Myers Squibb	Study Director
NCT00395343	Medical Monitor	Study Director
NCT00395512	VP, Biological Sciences	Study Director
NCT00395629	Novartis Pharmaceuticals, M.D.	Study Director
NCT00396006	Baxter BioScience Investigator, MD	Study Director
NCT00396097	Pfizer CT.gov Call Center	Study Director
NCT00396227	Novartis Pharmaceuticals	Study Director
NCT00396279	MD	Study Director
NCT00396331	Medical Monitor	Study Director
NCT00396357	Novartis Pharmaceuticals	Study Director
NCT00396422	Alza Corporation Clinical Trial	Study Director
NCT00396591	ICD	Study Director
NCT00396630	GSK Clinical Trials	Study Director
NCT00396799	Medical Monitor	Principal Investigator
NCT00396877	International Clinical Development Clinical Study Director	Study Director
NCT00397033	Johnson & Johnson Pharmaceutical Research & Development, L.L. C. Clinical Trial	Study Director
NCT00397176	Medical Monitor	Study Director
NCT00397631	Medical Monitor	Study Director
NCT00397722	GSK Clinical Trials	Study Director
NCT00397839	GSK Clinical Trials, MD	Study Director
NCT00398125	GSK Clinical Trials	Study Director
NCT00398476	GSK Clinical Trials	Study Director
NCT00398580	GSK Clinical Trials, M.D., Ph.D., FACP	Study Director
NCT00398645	GSK Clinical Trials, MD	Study Director
NCT00399438	Bristol-Myers Squibb	Study Director
NCT00399490	Pfizer CT.gov Call Center	Study Director
NCT00399542	Medical Monitor, MD	Study Director
NCT00399685	Bristol-Myers Squibb	Study Director
NCT00399711	Global Clinical Registry (GCR, 1452), MD	Study Director
NCT00399906	Bristol-Myers Squibb	Study Director
NCT00400153	Boehringer Ingelheim	Study Chair
NCT00400296	Clinical Trials	Study Director
NCT00400361	Clinical Trials	Study Director
NCT00400400	Novartis	Study Director
NCT00400439	Clinical Trials	Study Director
NCT00400608	GSK Clinical Trials	Study Director
NCT00400777	Novartis AG	Study Chair
NCT00401193	Clinical Development Support	Study Director
NCT00401219	Medical Monitor	Study Director
NCT00401245	Pfizer CT.gov Call Center	Study Director
NCT00401544	MD	Study Director
NCT00401583	GSK Clinical Trials, MD	Study Director
NCT00401726	Medical Monitor	Study Director
NCT00401765	Centocor, Inc. Clinical Trial	Study Director
NCT00401830	UCB Clinical Trial Call Center	Study Director
NCT00401973	Call 1-877-CTLILLY (1-877-285-4559) or 1-317-615-4559 Mon - Fri 9 AM - 5 PM Eastern time (UTC/GMT - 5 hours, EST)	Study Director
NCT00402103	Novartis Pharmaceuticals	Study Chair
NCT00402116	Call 1-877-CTLILLY (1-877-285-4559) or 1-317-615-4559 Mon - Fri 9 AM - 5 PM Eastern time (UTC/GMT - 5 hours, EST)	Study Director
NCT00402168	Bristol-Myers Squibb	Study Director
NCT00402181	Centocor, Inc. Clinical Trial	Study Director
NCT00402233	Boehringer Ingelheim	Study Chair
NCT00402324	Call 1-877-CTLILLY (1-877-285-4559) or 1-317-615-4559 Mon - Fri 9 AM to 5 PM Eastern Time (UTC/GMT - 5 hours, EST)	Study Director
NCT00402337	Microbia Medical Affairs	Study Director
NCT00402363	GSK Clinical Trials	Study Director
NCT00402428	GSK Clinical Trials	Study Director
NCT00402597	Johnson & Johnson Pharmaceutical Research & Development, L.L. C. Clinical Trial	Study Director
NCT00402688	Johnson & Johnson Pharmaceutical Research & Development, L.L. C. Clinical Trial	Study Director
NCT00402909	Novartis Pharmaceuticals	Study Director
NCT00402987	Pfizer CT.gov Call Center	Study Director
NCT00403416	Novartis Pharmaceuticals	Study Director
NCT00403637	Novartis	Principal Investigator
NCT00403767	Johnson & Johnson Pharmaceutical Research & Development, L.L. C. Clinical Trial	Study Director
NCT00404001	Microbia Medical Affairs	Study Director
NCT00404768	GSK Clinical Trials	Study Director
NCT00404924	Clinical Sciences & Operations	Study Director
NCT00406016	Novartis Pharmaceuticals	Study Director
NCT00406237	Pfizer CT.gov Call Center	Study Director
NCT00406315	Pfizer CT.gov Call Center	Study Director
NCT00406588	Global Clinical Director Solvay	Study Director
NCT00406640	Medical Monitor	Study Director
NCT00406640	Trial Manager	Principal Investigator
NCT00406640	Trial Manager	Principal Investigator
NCT00406640	Trial Manager	Principal Investigator
NCT00406848	Call 1-877-CTLILLY (1-877-285-4559) or 1-317-615-4559 Mon - Fri 9 AM to 5 PM Eastern time (UTC/GMT - 5 hours, EST)	Study Director
NCT00407173	Medical Monitor	Study Director
NCT00407745	Pfizer CT.gov Call Center	Study Director
NCT00408317	Aptalis Medical Information	Study Director
NCT00408421	Call 1-877-CTLILLY (1-877-285-4559) or 1-317-615-4559 Mon - Fri 9 AM - 5 PM Eastern Time (UTC/GMT - 5 hours, EST)	Study Director
NCT00408603	Sunesis Medical Monitor, MD	Study Director
NCT00408876	Call 1-877-CTLILLY (1-877-285-4559) or 1-317-615-4559 Mon - Fri 9 AM - 5 PM Eastern time (UTC/GMT - 5 hours, EST)	Study Director
NCT00409188	Medical Responsible	Study Director
NCT00409708	Novartis Pharmaceuticals	Study Chair
NCT00409773	Medical Monitor	Study Director
NCT00410072	Bristol-Myers Squibb	Study Director
NCT00410124	Novartis Pharmaceuticals	Study Director
NCT00410163	GSK Clinical Trials	Study Director
NCT00410202	Bristol-Myers Squibb	Study Director
NCT00410254	Medical Monitor	Study Director
NCT00410280	Pfizer CT.gov Call Center	Study Director
NCT00410371	GSK Clinical Trials	Study Director
NCT00410384	GSK Clinical Trials	Study Director
NCT00410410	Bristol-Myers Squibb	Study Director
NCT00410514	Use Central Contact	Study Director
NCT00411099	Novartis Pharmaceuticals	Study Director
NCT00411242	Novartis Pharmaceuticals	Study Director
NCT00411385	GSK Clinical Trials	Study Director
NCT00411437	Pfizer CT.gov Call Center	Study Director
NCT00411450	MD	Study Director
NCT00411528	Novartis Pharmaceuticals	Study Director
NCT00411580	Novartis	Principal Investigator
NCT00411580	Novartis Pharmaceuticals	Study Director
NCT00412061	Novartis Pharmaceuticals	Study Director
NCT00412113	Pfizer CT.gov Call Center	Study Director
NCT00412321	Centocor, Inc. Clinical Trial	Study Director
NCT00412373	Johnson & Johnson Pharmaceutical Research & Development, L.L. C. Clinical Trial	Study Director
NCT00412529	Novartis Pharmaceuticals	Study Director
NCT00412555	Clinical Trials	Study Director
NCT00412737	Clinical Trials	Study Director
NCT00412880	Boehringer Ingelheim	Study Chair
NCT00412893	Medical Director	Study Director
NCT00412984	Bristol-Myers Squibb	Study Director
NCT00413010	Pfizer CT.gov Call Center	Study Director
NCT00413049	Novartis Pharmaceuticals	Study Director
NCT00413075	enquiries@topotarget.com	Study Chair
NCT00413205	Clinical Trials	Study Director
NCT00413218	Medical Director	Study Director
NCT00413283	MD	Study Director
NCT00413322	Topotarget A/S	Study Chair
NCT00413413	Novartis Pharmaceuticals	Study Director
NCT00413452	MD	Study Director
NCT00413660	Pfizer CT.gov Call Center	Study Director
NCT00413790	Novartis Pharmaceuticals Corp.	Study Chair
NCT00414102	Medical Director Clinical Science	Study Director
NCT00414323	Call 1-877-CTLILLY (1-877-285-4559) or 1-317-615-4559 Mon - Fri 9 AM - 5 PM Eastern time (UTC/GMT - 5 hours, EST)	Study Director
NCT00414440	Novartis Pharmaceuticals	Study Director
NCT00414609	Novartis US	Study Chair
NCT00414765	Novartis Pharmaceuticals	Study Director
NCT00414908	Global Clinical Director Solvay	Study Director
NCT00414960	Call 1-877-CTLILLY (1-877-285-4559) or 1-317-615-4559 Mon - Fri 9 AM - 5 PM Eastern time (UTC/GMT - 5 hours, EST)	Study Director
NCT00415142	Clinical Sciences & Operations	Study Director
NCT00415194	Call 1-877-CTLILLY (1-877-285-4559) or 1-317-615-4559 Mon - Fri 9 AM - 5 PM Eastern time (UTC/GMT - 5 hours, EST)	Study Director
NCT00415363	Call 1-877-CTLILLY (1-877-285-4559) or 1-317-615-4559 Mon-Fri 9 AM - 5 PM Eastern time (UTC/GMT - 5 hours,, EST)	Study Director
NCT00415532	MD	Study Director
NCT00415636	Call 1-877-CTLILLY (1-877-285-4559) or 1-317-615-4559 Mon-Fri 9AM-5PM Eastern time (UTC/GMT-5 hours, EST)	Study Director
NCT00416702	Novartis	Principal Investigator
NCT00416845	Novartis	Principal Investigator
NCT00416962	Novartis	Principal Investigator
NCT00417079	ICD	Study Director
NCT00417118	Clinical Sciences & Operations	Study Director
NCT00417170	Novartis Pharmaceuticals	Study Director
NCT00417196	Novartis	Principal Investigator
NCT00417209	ICD	Study Director
NCT00417261	Novartis	Principal Investigator
NCT00417937	Bayer Study Director	Study Director
NCT00418522	Pfizer CT.gov Call Center	Study Director
NCT00418600	Medical Monitor	Study Director
NCT00418613	Medical Monitor	Study Director
NCT00418626	Novartis	Study Chair
NCT00418665	MD	Study Director
NCT00418756	Novartis Pharmaceuticals	Study Director
NCT00418769	Novartis Pharmaceuticals	Study Director
NCT00418834	Medical Monitor	Study Director
NCT00418938	MD	Study Director
NCT00419094	UCB Clinical Trial Call Center	Study Director
NCT00419159	Novartis Pharmaceuticals	Study Director
NCT00419393	UCB Clinical Trial Call Center, MD	Study Director
NCT00419796	Novartis	Principal Investigator
NCT00420004	Call 1-877-CTLILLY (1-877-285-4559) or 1-317-615-4559 Mon - Fri 9 AM - 5 PM Eastern time (UTC/GMT - 5 hours, EST)	Study Director
NCT00420043	Novartis Pharmaceuticals	Study Director
NCT00420056	Pfizer CT.gov Call Center	Study Director
NCT00420186	Bristol-Myers Squibb	Study Director
NCT00420212	Medical Director	Study Director
NCT00420342	Bayer Study Director	Study Director
NCT00420420	Medical Monitor	Study Director
NCT00420485	Novartis Pharmaceuticals	Study Director
NCT00420524	Novartis Pharmaceuticals	Study Director
NCT00420615	Novartis Pharmaceuticals	Study Director
NCT00420784	Medical Monitor	Study Director
NCT00421044	Novartis Pharmaceuticals	Study Director
NCT00421278	Medical Monitor	Study Director
NCT00421707	GSK Clinical Trials	Study Director
NCT00421889	e-mail contact via enquires@topotarget.com	Study Director
NCT00421928	Johnson & Johnson Pharmaceutical Research & Development, L.L. C. Clinical Trial	Study Director
NCT00422019	MD	Study Director
NCT00422097	Bristol-Myers Squibb	Study Director
NCT00422175	Novartis	Principal Investigator
NCT00422292	Medical Director	Study Director
NCT00422422	UCB Clinical Trial Call Center	Study Director
NCT00422461	Pfizer CT.gov Call Center	Study Director
NCT00422734	Call 1-877-CTLILLY (1-877-285-4559) or 1-317-615-4559 Mon - Fri 9 AM - 5 PM Eastern time (UTC/GMT - 5 hours, EST)	Study Director
NCT00422825	Novartis Pharmaceuticals	Study Director
NCT00422903	GSK Clinical Trials	Study Director
NCT00423046	GSK Clinical Trials	Study Director
NCT00423137	Boehringer Ingelheim	Study Chair
NCT00423319	Bristol-Myers Squibb	Study Director
NCT00423501	Clinical Trials	Study Director
NCT00424177	GSK Clinical Trials	Study Director
NCT00424255	GSK Clinical Trials	Study Director
NCT00424476	GSK Clinical Trials	Study Director
NCT00424593	Call 1-877-CTLILLY (1-877-285-4559) or 1-317-615-4559 Mon - Fri 9 AM - 5 PM Eastern time (UTC/GMT - 5 hours, EST)	Study Director
NCT00424632	Pfizer CT.gov Call Center	Study Director
NCT00424697	GSK Clinical Trials, MBChB, MFPM	Study Director
NCT00424931	Alza Corporation Clinical Trial	Study Director
NCT00424983	Novartis	Study Chair
NCT00424983	Novartis Pharmaceuticals	Study Director
NCT00425061	Pfizer CT.gov Call Center	Study Director
NCT00425100	Pfizer CT.gov Call Center	Study Director
NCT00425282	Johnson & Johnson Pharmaceutical Research & Development, L.L. C. Clinical Trial	Study Director
NCT00425321	Johnson & Johnson Pharmaceutical Research & Development, L.L. C. Clinical Trial	Study Director
NCT00425555	Novartis Pharmaceuticals	Study Director
NCT00425997	Novartis Pharmaceuticals	Study Chair
NCT00426140	Novartis Pharmaceuticals	Study Director
NCT00426530	Novartis Pharmaceuticals	Study Director
NCT00426530	Novartis Pharmaceuticals	Study Director
NCT00426556	Novartis Pharmaceuticals	Study Director
NCT00426582	Novartis Pharmaceuticals	Study Director
NCT00426660	Pfizer CT.gov Call Center	Study Director
NCT00427440	MD	Study Director
NCT00427544	Medical Monitor	Study Director
NCT00427596	GSK Clinical Trials, MD, MSc	Study Director
NCT00427687	Medical Monitor	Study Director
NCT00427895	Pfizer CT.gov Call Center	Study Director
NCT00427999	Novartis Pharmaceuticals	Study Director
NCT00427999	Novartis Pharmaceuticals	Study Director
NCT00428090	GSK Clinical Trials	Study Director
NCT00428389	Novartis Pharmaceuticals	Study Director
NCT00428610	Call 1-877-CTLILLY (1-877-285-4559) or 1-317-615-4559 Mon-Fri 9 AM - 5 PM Eastern time (UTC/GMT - 5 hours, EST)	Study Director
NCT00428714	Call 1-877-CTLILLY (1-877-285-4559) or 1-317-615-4559 Mon - Fri 9 AM - 5 PM Eastern time (UTC/GMT - 5 hours, EST)	Study Director
NCT00428909	Novartis Pharmaceuticals	Study Director
NCT00429260	Clinical Sciences & Operations	Study Director
NCT00429299	GSK Clinical Trials	Study Director
NCT00430248	Medical Director	Study Chair
NCT00430495	Medical Responsible	Study Director
NCT00430586	Merz Pharmaceuticals	Study Chair
NCT00430781	GSK Clinical Trials	Study Director
NCT00431067	Boehringer Ingelheim	Study Chair
NCT00431236	GSK Clinical Trials, MD	Study Director
NCT00431444	Novartis Pharmaceuticals	Study Director
NCT00432237	Medical Monitor	Study Director
NCT00432276	VP Biological Sciences	Study Director
NCT00432627	Novartis Pharmaceuticals	Study Director
NCT00433199	Global Clinical Director Solvay	Study Director
NCT00433290	Call 1-877-CTLILLY (1-877-285-4559) or 1-317-615-4559 Mon - Fri 9 AM - 5 PM Eastern time (UTC/GMT - 5 hours, EST)	Study Director
NCT00433667	Johnson & Johnson Pharmaceutical Research & Development, L.L. C. Clinical Trial	Study Director
NCT00433836	Novartis Pharmaceuticals	Study Director
NCT00434148	Novartis Pharmaceuticals	Study Director
NCT00434174	Novartis	Study Chair
NCT00434174	Novartis Pharmaceuticals	Study Director
NCT00434486	Medical Monitor	Study Director
NCT00434746	Medical Monitor	Study Director
NCT00435045	GSK Clinical Trials	Study Director
NCT00435162	Novartis Pharmaceuticals	Study Director
NCT00435409	Pfizer CT.gov Call Center	Study Director
NCT00435461	GSK Clinical Trials	Study Director
NCT00435669	Bristol-Myers Squibb	Study Director
NCT00435825	Clinical Trials	Study Director
NCT00435929	Clinical Trials	Study Director
NCT00436007	GSK Clinical Trials	Study Director
NCT00436280	Call 1-877-CTLILLY (1-877-285-4559) or 1-317-615-4559 Mon - Fri 9 AM - 5 PM Eastern time (UTC/GMT - 5 hours, EST)	Study Director
NCT00436553	Novartis	Study Chair
NCT00436670	MD	Study Director
NCT00437112	Call 1-877-CTLILLY (1-877-285-4559) or 1-317-615-4559 Mon - Fri from 9AM - 5PM Eastern time (UTC/GMT - 5 hours, EST)	Study Director
NCT00437229	GSK Clinical Trials	Study Director
NCT00437268	Call 1-877-CTLILLY (1-877-285-4559) or 1-317-615-4559 Mon - Fri 9 AM - 5 PM Eastern time (UTC/GMT - 5 hours,EST)	Study Director
NCT00437281	Pfizer CT.gov Call Center	Study Director
NCT00437424	Bristol-Myers Squibb	Study Director
NCT00437645	Novartis Pharmaceuticals	Study Chair
NCT00439270	Bristol-Myers Squibb	Study Director
NCT00439725	Bayer Study Director	Study Director
NCT00439738	Novartis Pharmaceuticals	Study Chair
NCT00439777	Bayer Study Director	Study Director
NCT00440011	Medical Affairs	Study Director
NCT00440128	GSK Clinical Trials	Study Director
NCT00440141	Medical Affairs	Study Director
NCT00440193	Bayer Study Director	Study Director
NCT00440427	Medical Monitor	Study Director
NCT00440466	Johnson & Johnson Pharmaceutical Research & Development, L.L. C. Clinical Trial	Study Director
NCT00440492	Medical Monitor	Study Director
NCT00440518	UCB Clinical Trial Call Center	Study Director
NCT00440557	Johnson & Johnson Pharmaceutical Research and Development, L.L C. Clinical Trial	Study Director
NCT00440648	Medical Monitor	Study Director
NCT00440947	GSK Clinical Trials	Study Director
NCT00441012	Medical Monitor	Study Director
NCT00441064	Novartis	Study Chair
NCT00441155	Novartis Pharmaceuticals	Study Director
NCT00441155	NovartisPharmaceuticals	Study Director
NCT00441337	Bristol-Myers Squibb	Study Director
NCT00441441	GSK Clinical Trials	Study Director
NCT00442169	Medical Director	Study Director
NCT00442546	Pfizer CT.gov Call Center	Study Director
NCT00442702	Clinical Trials	Study Director
NCT00442871	GSK Clinical Trials	Study Director
NCT00442936	Medical Monitor	Study Director
NCT00443131	GSK Clinical Trials	Study Director
NCT00443209	Medical Director	Study Director
NCT00443287	ICD	Study Director
NCT00443820	Novartis Pharmaceuticals	Study Director
NCT00443898	Novartis Pharmaceuticals	Study Director
NCT00444457	Medical Monitor	Study Director
NCT00444626	Medical Monitor	Study Director
NCT00444912	Medical Monitor	Study Director
NCT00444925	Pfizer CT.gov Call Center	Study Director
NCT00445302	Medical Monitor	Study Director
NCT00445315	Pfizer CT.gov Call Center	Study Director
NCT00445679	Medical Monitor	Study Director
NCT00445679	Trial Manager	Principal Investigator
NCT00446082	Novartis	Study Chair
NCT00446082	Novartis Pharmaceuticals	Study Director
NCT00446199	Bayer Study Director	Study Director
NCT00446511	Novartis Pharmaceuticals	Study Chair
NCT00446784	Pfizer CT.gov Call Center	Study Director
NCT00447629	Medical Monitor	Study Director
NCT00447681	Medical Monitor	Study Director
NCT00448110	Javelin Pharmaceuticals	Study Director
NCT00448227	Novartis	Principal Investigator
NCT00448396	Novartis Pharmaceuticals	Study Chair
NCT00448786	MD	Study Director
NCT00448916	Pfizer CT.gov Call Center	Study Director
NCT00449176	Johnson & Johnson Pharmaceutical Research & Development, L.L. C. Clinical Trial	Study Director
NCT00449644	Janssen Infectious Diseases BVBA Clinical Trial	Study Director
NCT00449761	Novartis Pharmaceuticals	Study Director
NCT00449930	Medical Monitor	Study Director
NCT00450138	Clinical Sciences & Operations	Study Director
NCT00450437	Novartis Vaccines and Diagnostics	Study Director
NCT00451035	Novartis Pharmaceuticlas	Study Director
NCT00451178	Call 1-877-CTLILLY (1-877-285-4559) or 1-317-615-4559 Mon - Fri 9 AM - 5 PM Eastern time (UTC/GMT - 5 hours, EST)	Study Director
NCT00451321	GSK Clinical Trials	Study Director
NCT00451451	Medical Director	Study Director
NCT00451958	Clinical Development Support	Study Director
NCT00452257	Call 1-877-CTLILLY (1-877-285-4559) or 1-317-615-4559 Mon - Fri 9AM - 5 PM Eastern Time (UTC/GMT- 5 hours,EST)	Study Director
NCT00452348	GSK Clinical Trials	Study Director
NCT00452400	Boehringer Ingelheim	Study Chair
NCT00452452	Medical Monitor	Study Director
NCT00452452	Trial Manager	Principal Investigator
NCT00452504	Medical Monitor	Study Director
NCT00452504	Trial Manager	Principal Investigator
NCT00452530	Bristol-Myers Squibb	Study Director
NCT00452673	Bristol-Myers Squibb	Study Director
NCT00452699	GSK Clinical Trials	Study Director
NCT00452790	Medical Monitor	Study Director
NCT00454090	Emerging Oncology Medical Science Director, MD	Study Director
NCT00454116	Clinical Sciences & Operations	Study Director
NCT00454220	Medical Monitor	Study Director
NCT00454298	Medical Montior	Study Director
NCT00454350	Medical Monitor	Study Director
NCT00454584	Centocor, Inc. Clinical Trial	Study Director
NCT00454649	Pfizer CT.gov Call Center	Study Director
NCT00454779	MD	Study Director
NCT00454909	GSK Clinical Trials	Study Director
NCT00455013	Bristol-Myers Squibb	Study Director
NCT00455195	Medical Monitor	Study Director
NCT00455520	Johnson & Johnson Pharmaceutical Research & Development, L.L. C. Clinical Trial	Study Director
NCT00455533	Bristol-Myers Squibb	Study Director
NCT00456833	Novartis Pharmaceuticals	Study Director
NCT00456833	Novartis Pharmaceuticals	Study Director
NCT00456898	Medical Monitor	Study Director
NCT00457002	Bristol-Myers Squibb	Study Director
NCT00457119	Novartis Pharmaceuticals	Study Director
NCT00457249	Medical Director	Study Director
NCT00457392	Pfizer CT.gov Call Center	Study Director
NCT00457626	Novartis Pharmaceuticals	Study Director
NCT00457691	Pfizer CT.gov Call Center	Study Director
NCT00457795	Medical Affairs	Study Director
NCT00457821	Medical Monitor	Study Director
NCT00458107	Medical Monitor	Study Director
NCT00458952	Molecular Insight Pharmaceuticals	Study Director
NCT00459667	Bayer Study Director	Study Director
NCT00460265	MD	Study Director
NCT00460603	Pfizer CT.gov Call Center	Study Director
NCT00460746	Tibotec, Inc. Clinical Trial	Study Director
NCT00460811	Microbia Medical Director, MD	Study Director
NCT00460941	Clinical Trials	Study Director
NCT00461006	Clinical Trials	Study Director
NCT00461032	Medical Monitor	Study Director
NCT00461058	Clinical Trials	Study Director
NCT00461292	Medical Director	Study Director
NCT00461565	Bayer Study Director	Study Director
NCT00463021	Medical Monitor	Study Director
NCT00463242	Novartis Pharmaceuticals	Study Director
NCT00463320	GSK Clinical Trials	Study Director
NCT00463567	Novartis Pharmaceuticals	Study Chair
NCT00463918	Pfizer CT.gov Call Center	Study Director
NCT00464243	ICD CSD	Study Director
NCT00464269	UCB Clinical Trial Call Center	Study Director
NCT00464321	Medical Monitor	Study Director
NCT00464334	Medical Monitor	Study Director
NCT00464438	Medical Director	Study Director
NCT00464633	Clinical Sciences & Operations	Study Director
NCT00464672	Novartis Vaccines and Diagnostics	Study Director
NCT00464685	Medical Director	Study Director
NCT00464737	UCB Clinical Trial Call Center	Study Director
NCT00464789	Medical Monitor	Study Director
NCT00464945	Medical Monitor	Study Director
NCT00464945	Trial Manager	Principal Investigator
NCT00465075	Medical Monitor	Study Director
NCT00466245	Medical Monitor	Study Director
NCT00466440	Call 1-877-CTLILLY (1-877-285-4559) or 1-317-615-4559 Mon - Fri 9 AM - 5 PM Eastern time (UTC/GMT - 5 hours, EST)	Study Director
NCT00466466	Novartis Pharmaceuticals	Study Director
NCT00467025	MD	Study Director
NCT00467519	Medical Director	Study Director
NCT00467740	Boehringer Ingelheim	Study Chair
NCT00467779	Clinical Trials	Study Director
NCT00467870	Indevus Pharmaceuticals, Inc.	Study Director
NCT00468039	Novartis Pharmaceuticals	Study Director
NCT00468286	Clinical Development Support	Study Director
NCT00468481	Bayer Study Director	Study Director
NCT00468689	GSK Clinical Trials, MD	Study Director
NCT00468845	Pfizer CT.gov Call Center	Study Director
NCT00468897	GSK Clinical Trials, MD	Study Director
NCT00470145	GSK Clinical Trials	Study Director
NCT00470834	GSK Clinical Trials	Study Director
NCT00471081	GSK Clinical Trials	Study Director
NCT00471094	Medical Director	Study Director
NCT00471146	Pfizer CT.gov Call Center	Study Director
NCT00471276	Pfizer CT.gov Call Center	Study Director
NCT00471328	Novartis Pharmaceuticals	Study Director
NCT00472368	Novartis Pharmaceuticals	Study Director
NCT00472836	Pfizer CT.gov Call Center	Study Director
NCT00472927	Medical Monitor	Study Director
NCT00473512	Cougar Biotechnology Clinical Trial	Study Director
NCT00473525	Pfizer CT.gov Call Center	Study Director
NCT00473746	Janssen Research & Development, LLC Clinical Trial	Study Director
NCT00474058	UCB Clinical Trial Call Center	Study Director
NCT00474175	Pfizer CT.gov Call Center	Study Director
NCT00474383	Cougar Biotechnology, Inc. Clinical Trial	Study Director
NCT00474487	Novartis Vaccines and Diagnostics	Study Director
NCT00474526	Novartis - Vaccines	Study Chair
NCT00474539	Medical Monitor	Study Director
NCT00474539	Trial Manager	Principal Investigator
NCT00474760	Pfizer CT.gov Call Center	Study Director
NCT00474786	Pfizer CT.gov Call Center	Study Director
NCT00474799	Javelin Pharmaceuticals	Study Director
NCT00475033	Medical Monitor	Study Director
NCT00475033	Trial Manager	Principal Investigator
NCT00475644	Call 1-877-CTLILLY (1-877-285-4559) or 1-317-615-4559 Mon - Fri 9 AM - 5 PM Eastern time (UTC/GMT - 5 hours,EST)	Study Director
NCT00475735	Medical Monitor	Study Director
NCT00475852	Scios, Inc. Clinical Trial	Study Director
NCT00475865	ICD CSD	Study Director
NCT00477269	Novartis	Principal Investigator
NCT00477269	Novartis Pharmaceuticals	Study Director
NCT00477490	Clinical Development Support	Study Director
NCT00477594	Medical Monitor	Study Director
NCT00477659	Pfizer CT.gov Call Center	Study Director
NCT00478634	Novartis Pharmaceuticals	Study Director
NCT00478725	GSK Clinical Trials	Study Director
NCT00479219	Medical Monitor	Study Director
NCT00479232	Medical Monitor	Study Director
NCT00479401	Boehringer Ingelheim	Study Chair
NCT00479440	Medical Monitor	Study Director
NCT00479492	Pfizer CT.gov Call Center	Study Director
NCT00479583	Bristol-Myers Squibb	Study Director
NCT00479700	Medical Monitor	Study Director
NCT00479778	Medical Monitor	Study Director
NCT00479882	Medical Monitor	Study Director
NCT00480818	Medical Monitor	Study Director
NCT00481325	Bristol-Myers Squibb	Study Director
NCT00481520	Medical Monitor	Study Director
NCT00482014	Call 1-877-CTLILLY (1-877-285-4559) or 1-317-615-4559 Mon - Fri 9 AM - 5 PM Eastern time (UTC/GMT - 5 hours, EST)	Study Director
NCT00482196	Medical Monitor	Study Director
NCT00482612	Medical Director	Study Director
NCT00482729	Medical Monitor	Study Director
NCT00483379	Medical Monitor	Study Director
NCT00483548	Pfizer CT.gov Call Center	Study Director
NCT00483574	Medical Director	Study Director
NCT00483704	Medical Monitor	Study Director
NCT00483756	Pfizer CT.gov Call Center	Study Director
NCT00483860	GSK Clinical Trials	Study Director
NCT00485303	Cougar Biotechnology, Inc. Clinical Trial	Study Director
NCT00485719	Clinical Sciences & Operations	Study Director
NCT00485758	Medical Monitor	Study Director
NCT00486135	Clinical Sciences & Operations	Study Director
NCT00486200	Use Central Contact	Study Director
NCT00486278	Global Clinical Registry (GCR, 1452)	Study Director
NCT00487240	Call 1-877-CTLILLY (1-877-285-4559) or 1-317-615-4559 Mon - Fri 9 AM - 5 PM Eastern time (UTC/GMT - 5 hours, EST)	Study Director
NCT00487435	Johnson & Johnson Pharmaceutical Research & Development, L.L. C. Clinical Trial	Study Director
NCT00487539	Janssen Research & Development, LLC Clinical Trial	Study Director
NCT00487825	Novartis	Principal Investigator
NCT00488267	Medical Monitor	Study Director
NCT00488319	Janssen Research & Development, LLC Clinical Trial	Study Director
NCT00488345	Medical Monitor	Study Director
NCT00488449	GSK Clinical Trials	Study Director
NCT00488514	GSK Clinical Trials	Study Director
NCT00488631	Janssen Research & Development, LLC Clinical Trial	Study Director
NCT00489359	Call 1-877-CTLILLY (1-877-285-4559) or 1-317-615-4559 Mon - Fri 9 AM - 5 PM Eastern time (UTC/GMT - 5 hours, EST)	Study Director
NCT00489424	Novartis Pharmaceuticals	Study Director
NCT00489489	ICD	Study Director
NCT00489736	International Clinical Development	Study Director
NCT00489970	GSK Clinical Trials	Study Director
NCT00490451	Call 1-877-CTLILLY (1-877-285-4559) or 1-317-615-4559 Mon - Fri 9 AM - 5 PM Eastern time (UTC/GMT - 5 hours, EST)	Study Director
NCT00490776	Novartis Pharmaceuticals	Study Director
NCT00490971	Johnson & Johnson Pharmaceutical Research & Development, L.L. C. Clinical Trial	Study Director
NCT00491829	Boehringer Ingelheim	Study Chair
NCT00491894	Shionogi Clinical Trials Administrator Clinical Support Help Line	Study Director
NCT00492011	Medical Director Clinical Science	Study Director
NCT00492024	Bayer Study Director	Study Director
NCT00492232	Medical Director Clinical Science	Study Director
NCT00492323	Johnson & Johnson Pharmaceutical Research & Development, L.L. C. Clinical Trial	Study Director
NCT00492869	Novartis Pharmaceuticals	Study Director
NCT00493155	Clinical Trials	Study Director
NCT00493324	Use Central Contact	Study Director
NCT00494013	Call 1-877-CTLILLY (1-877-285-4559) or 1-317-615-4559 Mon - Fri 9 AM - 5 PM Eastern time (UTC/GMT - 5 hours, EST)	Study Director
NCT00494780	GSK Clinical Trials	Study Director
NCT00495014	GSK Clinical Trials, MD, MPH	Study Director
NCT00495274	GSK Clinical Trials	Study Director
NCT00495469	GSK Clinical Trials	Study Director
NCT00495885	ICD CSD	Study Director
NCT00496197	Pfizer CT.gov Call Center	Study Director
NCT00496262	Program Director, Clinical R&D	Study Director
NCT00498108	UCB Clinical Trial Call Center	Study Director
NCT00498602	Pfizer CT.gov Call Center	Study Director
NCT00498745	Puma	Study Director
NCT00499200	Medical Monitor	Study Director
NCT00499200	Trial Manager	Principal Investigator
NCT00499538	Medical Monitor	Study Director
NCT00499629	Medical Monitor	Study Director
NCT00499642	Medical Monitor	Study Director
NCT00499642	Trial Manager	Principal Investigator
NCT00499928	GSK Clinical Trials, M.D.	Study Director
NCT00500058	GSK Clinical Trials	Study Director
NCT00500266	Medical Monitor	Study Director
NCT00500331	GSK Clinical Trials	Study Director
NCT00500682	Professor	Principal Investigator
NCT00500721	Medical Monitor	Study Director
NCT00500760	MD	Study Director
NCT00500903	Medical Monitor	Study Director
NCT00501046	Professor	Principal Investigator
NCT00501202	Johnson & Johnson Pharmaceutical Research & Development, L.L. C. Clinical Trial	Study Director
NCT00501267	GSK Clinical Trials, MD	Study Director
NCT00501462	GSK Clinical Trials	Study Director
NCT00502242	Pfizer CT.gov Call Center	Study Director
NCT00502515	ICD CSD	Study Director
NCT00502710	Clinical Trials	Study Director
NCT00502775	GSK Clinical Trials	Study Director
NCT00502801	PriCara, Unit of Ortho-McNeil, Inc. Clinical Trial	Study Director
NCT00503113	Clinical Trials	Study Director
NCT00503451	Novartis Pharmaceuticals	Study Director
NCT00503685	E-mail: ClinicalTrials@ ImClone.com	Study Chair
NCT00504270	Clinical Trials	Study Chair
NCT00504790	GSK Clinical Trials	Study Director
NCT00504816	GSK Clinical Trials	Study Director
NCT00505687	UCB Clinical Trial Call Center	Study Director
NCT00505843	Medical Monitor	Study Director
NCT00505934	UCB Clinical Trial Call Center	Study Director
NCT00506350	GSK Clinical Trials	Study Director
NCT00506441	Professor	Principal Investigator
NCT00506792	Novartis	Principal Investigator
NCT00506805	Pfizer CT.gov Call Center	Study Director
NCT00507026	Javelin Pharmaceuticals	Study Director
NCT00507416	Medical Monitor	Study Director
NCT00507442	Medical Monitor	Study Director
NCT00507455	Use Central Contact	Study Director
NCT00507741	Medical Director	Study Director
NCT00508287	Bristol-Myers Squibb	Study Director
NCT00508365	GSK Clinical Trials, MD	Study Director
NCT00508534	GSK Clinical Trials, MD	Study Director
NCT00508742	Pfizer CT.gov Call Center	Study Director
NCT00508820	MD	Study Director
NCT00509873	Medical Director	Study Director
NCT00510029	Medical Monitor	Study Director
NCT00510068	Novartis Pharmaceuticals	Study Director
NCT00510146	Call 1-877-CTLILLY (1-877-285-4559) or 1-317-615-4559 Mon - Fri 9 AM - 5 PM Eastern Time (UTC/GMT - 5hrs, EST)	Study Director
NCT00510276	Call 1-877-CTLILLY (1-877-285-4559) or 1-317-615-4559 Mon-Fri 9 AM - 5 PM Eastern time (UTC/GMT - 5 hours, EST)	Study Director
NCT00510354	Novartis Pharmaceuticals	Study Director
NCT00510484	Global Clinical Director Solvay	Study Director
NCT00510510	Novartis Pharmaceuticals	Study Chair
NCT00510874	GSK Clinical Trials	Study Director
NCT00510952	Call 1-877-CTLILLY (1-877-285-4559) or 1-317-615-4559 Mon-Fri 9 AM-5 PM Eastern time (UTC/GMT-5 hours, EST)	Study Director
NCT00511108	Medical Monitor	Study Director
NCT00511459	MD	Study Director
NCT00511472	Medical Monitor	Study Director
NCT00511667	Medical Monitor	Study Director
NCT00511706	Medical Director	Study Director
NCT00511823	GSK Clinical Trials	Study Director
NCT00511849	Pfizer CT.gov Call Center	Study Director
NCT00513565	GSK Clinical Trials	Study Director
NCT00513682	Aptalis Medical Information	Study Director
NCT00514007	Medical Director	Study Director
NCT00514267	Central Contact	Study Director
NCT00514306	Medical Monitor	Study Director
NCT00514371	Bristol-Myers Squibb	Study Director
NCT00514514	Novartis	Study Director
NCT00514514	Novartis Pharmaceuticals	Study Director
NCT00514943	Boehringer Ingelheim	Study Chair
NCT00515034	Johnson & Johnson Pharmaceutical Research & Development, L.L. C. Clinical Trial	Study Director
NCT00515203	MD	Study Director
NCT00515463	MD	Study Director
NCT00515697	Call 1-877-CTLILLY (1-877-285-4559) or 1-317-615-4559 Mon - Fri 9 AM - 5 PM Eastern time (UTC/GMT - 5 hours, EST)	Study Director
NCT00516139	GSK Clinical Trials	Study Director
NCT00516321	GSK Clinical Trials	Study Director
NCT00516451	Bristol-Myers Squibb	Study Director
NCT00516737	Medical Monitor	Study Director
NCT00516893	Medical Director	Study Director
NCT00517348	Medical Monitor	Study Director
NCT00517439	Clinical Trials	Study Director
NCT00517543	GSK Clinical Trials, MD	Study Director
NCT00517634	GSK Clinical Trials	Study Director
NCT00517816	Clinical Trials	Study Director
NCT00518089	Medical Director	Study Director
NCT00518115	GSK Clinical Trials	Study Director
NCT00518180	Novartis Vaccines and Diagnostics	Study Director
NCT00518297	Bristol-Myers Squibb	Study Director
NCT00518323	Johnson & Johnson Pharmaceutical Research & Development, L.L. C. Clinical Trial	Study Director
NCT00518336	GSK Clinical Trials	Study Director
NCT00518531	MD	Study Director
NCT00518622	Medical Monitor	Study Director
NCT00518713	Email contact via H. Lundbeck A/S	Study Director
NCT00518739	Medical Monitor	Study Director
NCT00518765	Novartis	Principal Investigator
NCT00518882	Global Clinical Registry (GCR, 1452)	Study Director
NCT00519233	Central Contact	Study Director
NCT00519285	Clinical Sciences & Operations	Study Director
NCT00519298	Medical Monitor	Study Director
NCT00519298	Trial Manager	Principal Investigator
NCT00519480	GSK Clinical Trials	Study Director
NCT00519636	GSK Clinical Trials	Study Director
NCT00519987	Javelin Pharmaceuticals	Study Director
NCT00520169	Javelin Pharmaceuticals	Study Director
NCT00520481	Call 1-877-CTLILLY (1-877-285-4559) or 1-317-615-4559 Mon - Fri 9 AM - 5 PM Eastern time (UTC/GMT - 5 hours, EST)	Study Director
NCT00520741	UCB Clinical Trial Call Center	Study Director
NCT00520936	1-877-CTLILLY (1-877-285-4559) or 1-317-615-4559 Mon - Fri 9 AM - 5 PM Eastern time (UTC/GMT - 5 hours, EST)	Study Director
NCT00521456	Medical Director	Study Director
NCT00521586	Pfizer CT.gov Call Center	Study Director
NCT00522379	UCB Clinical Trial Call Center	Study Director
NCT00522873	Bayer Study Director	Study Director
NCT00523341	MD	Study Director
NCT00523549	Novartis Pharmaceuticals	Study Director
NCT00523926	Tibotec-Virco Virology BVBA Clinical Trial	Study Director
NCT00523991	Boehringer Ingelheim	Study Chair
NCT00524043	Johnson & Johnson Pharmaceutical Research & Development, L.L. C. Clinical Trial	Study Director
NCT00524056	Ortho-McNeil Janssen Scientific Affairs, LLC Clinical Trial	Study Director
NCT00524264	Medical Director	Study Director
NCT00524303	GSK Clinical Trials	Study Director
NCT00524368	Tibotec Pharmaceuticals, Ireland Clinical Trial	Study Director
NCT00524940	Medical Director	Study Director
NCT00525148	Boehringer Ingelheim	Study Chair
NCT00525512	Boehringer Ingelheim	Study Chair
NCT00526045	Novartis Pharmaceuticals	Study Director
NCT00526071	Medical Director	Study Director
NCT00526474	Medical Director	Study Director
NCT00526669	GSK Clinical Trials	Study Director
NCT00527072	Centocor Ortho Biotech Services, L.L.C. Clinical Trial	Study Director
NCT00527150	Pfizer CT.gov Call Center	Study Director
NCT00527423	Clinical Trial Management	Study Director
NCT00527488	Clinical Development Support	Study Director
NCT00527735	Bristol-Myers Squibb	Study Director
NCT00528021	Medical Monitor	Study Director
NCT00528112	Bayer Study Director	Study Director
NCT00528281	GSK Clinical Trials	Study Director
NCT00528619	Pfizer CT.gov Call Center	Study Director
NCT00528879	Bristol-Myers Squibb	Study Director
NCT00528996	Boehringer Ingelheim	Study Chair
NCT00529451	Novartis	Study Chair
NCT00529516	GSK Clinical Trials	Study Director
NCT00529529	Novartis Pharmaceuticals	Study Chair
NCT00529568	GSK Clinical Trials	Study Director
NCT00529659	Medical Monitor	Study Director
NCT00529789	Call 1-877-CTLILLY (1-877-285-4559) or 1-317-615-4559 Mon-Fri 9AM-5PM Eastern Standard time (UTC/GMT - 5 hours, EST)	Study Director
NCT00530062	Clinical Study Leader	Study Chair
NCT00530114	MD	Study Director
NCT00530348	Medical Monitor	Study Director
NCT00530621	Call 1-877-CTLILLY (1-877-285-4559) or 1-317-615-4559 Mon - Fri 9 AM - 5 PM Eastern time (UTC/GMT - 5 hours, EST	Study Director
NCT00530842	Boehringer Ingelheim	Study Chair
NCT00530855	UCB Clinical Trial Call Center	Study Director
NCT00531232	Medical Monitor	Study Director
NCT00531453	Medical Monitor	Study Director
NCT00531479	Pfizer CT.gov Call Center	Study Director
NCT00531622	ICD	Study Director
NCT00531752	Pfizer CT.gov Call Center	Study Director
NCT00531817	Clinical Trials	Study Director
NCT00532077	GSK Clinical Trials, MD	Study Director
NCT00532090	Clinical Trials	Study Director
NCT00532155	Clinical Sciences & Operations	Study Director
NCT00532233	Novartis	Principal Investigator
NCT00532233	Novartis Pharmaceuticals	Study Director
NCT00532389	Novartis Pharmaceuticals	Study Director
NCT00532610	GSK Clinical Trials	Study Director
NCT00532935	Medical Monitor	Study Director
NCT00532948	Clinical Trials	Study Chair
NCT00533312	Medical Monitor	Study Director
NCT00533377	Pfizer CT.gov Call Center	Study Director
NCT00533429	Call 1-877-CTLILLY (1-877-285-4559) or 1-317-615-4559 Mon - Fri 9 AM - 5 PM Eastern time (UTC/GMT - 5 hours, EST)	Study Director
NCT00533702	Call 1-877-CTLILLY (1-877-285-4559) or 1-317-615-4559 Mon - Fri 9 AM - 5 PM Eastern time (UTC/GMT - 5 hours, EST)	Study Director
NCT00533897	Bristol-Myers Squibb	Study Director
NCT00534027	MD	Study Director
NCT00534248	Medical Monitor	Study Director
NCT00534352	Tibotec, Inc. Clinical Trial	Study Director
NCT00534976	Medical Monitor	Study Director
NCT00535132	Johnson & Johnson Pharmaceutical Research & Development, L.L. C. Clinical Trial	Study Director
NCT00535145	Ortho-McNeil Janssen Scientific Affairs, LLC Clinical Trial	Study Director
NCT00535236	Medical Monitor	Study Director
NCT00535392	UCB Clinical Trial Call Center	Study Director
NCT00535405	Medical Monitor	Study Director
NCT00535522	Medical Monitor	Study Director
NCT00535782	Clinical Trials	Study Director
NCT00535951	Novartis Pharmaceuticals	Study Director
NCT00536120	Medical Director	Study Director
NCT00536471	Call 1-877-CTLILLY (1-877-285-4559) or 1-317-615-4559 Mon - Fri 9 AM - 5 PM Eastern time (UTC/GMT - 5 hours, EST)	Study Director
NCT00536484	Pfizer CT.gov Call Center	Study Director
NCT00536809	GSK Clinical Trials	Study Director
NCT00536939	Call 1-877-CTLILLY (1-877-285-4559) or 1-317-615-4559 Mon - Fri 9 AM - 5 PM Eastern time (UTC/GMT - 5 hours, EST)	Study Director
NCT00537043	GSK Clinical Trials, MD	Study Director
NCT00537303	Global Clinical Registry (GCR, 1452)	Study Director
NCT00537368	Centocor, Inc. Clinical Trial	Study Director
NCT00537381	Centocor, Inc. Clinical Trial	Study Director
NCT00537615	Pfizer CT.gov Call Center	Study Director
NCT00537654	GSK Clinical Trials, MD	Study Director
NCT00537719	GSK Clinical Trials	Study Director
NCT00537940	Pfizer CT.gov Call Center	Study Director
NCT00538304	Medical Director	Study Director
NCT00538434	Sponsor's Medical Expert, MD	Study Director
NCT00538681	Call 1-877-CTLILLY (1-877-285-4559) or 1-317-615-4559 Mon-Fri 9 AM - 5 PM Eastern time (UCT/GMT - 5 hours, EST)	Study Director
NCT00539006	GSK Clinical Trials	Study Director
NCT00539136	GSK Clinical Trials, MD	Study Director
NCT00539526	Medical Director	Study Director
NCT00539760	GSK Clinical Trials	Study Director
NCT00539929	Eisai US Medical Services	Study Director
NCT00539994	GSK Clinical Trials	Study Director
NCT00540358	Clinical Sciences & Operations	Study Director
NCT00540449	Tibotec Pharmaceuticals Clinical Trial	Study Director
NCT00540553	GSK Clinical Trials	Study Director
NCT00541229	Medical Monitor	Study Director
NCT00541242	Medical Director	Study Director
NCT00541450	Medical Monitor	Study Director
NCT00541866	Sunesis Medical Monitor, MD	Study Director
NCT00541996	Medical Monitor	Study Director
NCT00542009	Pfizer CT.gov Call Center	Study Director
NCT00542386	Professor	Principal Investigator
NCT00542425	Medical Director	Study Director
NCT00542685	Pfizer CT.gov Call Center	Study Director
NCT00543413	Medical Monitor	Study Director
NCT00543543	Medical Monitor	Study Director
NCT00543569	Principal Investigator	Principal Investigator
NCT00543569	Senior Medical Director	Study Director
NCT00543634	Pfizer CT.gov Call Center	Study Director
NCT00543725	Tibotec Pharmaceuticals, Ireland Clinical Trial	Study Director
NCT00543790	Pfizer CT.gov Call Center	Study Director
NCT00544440	Janssen Research & Development, LLC Clinical Trial	Study Director
NCT00544882	Duramed Protocol Chair	Study Chair
NCT00545129	Pfizer CT.gov Call Center	Study Director
NCT00545233	Clinical Trials	Study Director
NCT00545259	Novartis	Principal Investigator
NCT00546078	GSK Clinical Trials	Study Director
NCT00546507	Medical Affairs	Study Director
NCT00546572	Pfizer CT.gov Call Center	Study Director
NCT00546637	Pfizer CT.gov Call Center	Study Director
NCT00546715	Bristol-Myers Squibb	Study Director
NCT00546741	Bristol-Myers Squibb	Study Director
NCT00546780	Bristol-Myers Squibb	Study Director
NCT00546819	Medical Monitor	Study Director
NCT00546832	Medical Affairs	Study Director
NCT00546871	Baxter BioScience Investigator	Study Director
NCT00547014	Pfizer CT.gov Call Center	Study Director
NCT00547157	MD	Study Director
NCT00547521	Bristol-Myers Squibb	Study Director
NCT00547560	Pfizer CT.gov Call Center	Study Director
NCT00547586	Medical Monitor	Study Director
NCT00548093	Pfizer CT.gov Call Center	Study Director
NCT00548353	Medical Monitor	Study Director
NCT00548405	Medical Monitor	Study Director
NCT00548678	Javelin Pharmaceuticals	Study Director
NCT00549185	Clinical Sciences & Operations	Study Director
NCT00549302	Call 1-877-CTLILLY (1-877-285-4559) or 1-317-615-4559 Mon - Fri 9 AM - 5 PM Eastern time (UTC/GMT - 5 hours, EST)	Study Director
NCT00549510	GSK Clinical Trials, MD	Study Director
NCT00549549	Pfizer CT.gov Call Center	Study Director
NCT00549653	GSK Clinical Trials	Study Director
NCT00549666	Medical Director, MD	Study Director
NCT00549718	Medical Director, MD	Study Director
NCT00549770	Novartis Pharmaceuticals	Study Chair
NCT00549770	Novartis Pharmaceuticals	Study Director
NCT00549939	ICD CSD	Study Director
NCT00550212	Puma	Study Director
NCT00550303	Medical Monitor	Study Director
NCT00550355	Pfizer CT.gov Call Center	Study Director
NCT00550381	Medical Monitor	Study Director
NCT00550446	Pfizer CT.gov Call Center	Study Director
NCT00550745	Medical Monitor	Study Director
NCT00551031	Medical Director	Study Director
NCT00551135	Pfizer CT.gov Call Center	Study Director
NCT00551148	Pfizer CT.gov Call Center	Study Director
NCT00551187	Medical Monitor	Study Director
NCT00551213	Medical Director	Study Director
NCT00551564	GSK Clinical Trials, MD	Study Director
NCT00551694	GSK Clinical Trials	Study Director
NCT00552058	UCB Clinical Trial Call Center	Study Director
NCT00552240	Boehringer Ingelheim	Study Chair
NCT00552279	GSK Clinical Trials	Study Director
NCT00552344	UCB Clinical Trial Call Center	Study Director
NCT00552708	GSK Clinical Trials, MD	Study Director
NCT00553254	Pfizer CT.gov Call Center	Study Director
NCT00553696	Pfizer CT.gov Call Center	Study Director
NCT00554450	Bristol-Myers Squibb	Study Director
NCT00554606	NOVARTIS	Principal Investigator
NCT00554970	Medical Director	Study Director
NCT00555035	GSK Clinical Trials, MD	Study Director
NCT00555061	GSK Clinical Trials	Study Director
NCT00555620	Pfizer CT.gov Call Center	Study Director
NCT00555672	Pfizer CT.gov Call Center	Study Director
NCT00555906	Pfizer CT.gov Call Center	Study Director
NCT00556920	GSK Clinical Trials, MD	Study Director
NCT00556998	Pfizer CT.gov Call Center	Study Director
NCT00557128	GSK Clinical Trials, MD	Study Director
NCT00557310	Call 1-877-CTLILLY (1-877-285-4559) or 1-317-615-4559 Mon-Fri 9 AM - 5 PM Eastern time (UTC/GMT - 5 hours, EST)	Study Director
NCT00557505	Pfizer CT.gov Call Center	Study Director
NCT00557856	Pfizer CT.gov Call Center	Study Director
NCT00558103	GSK Clinical Trials	Study Director
NCT00558259	Boehringer Ingelheim	Study Chair
NCT00558428	Boehringer Ingelheim	Study Chair
NCT00558467	Boehringer Ingelheim	Study Chair
NCT00559182	Medical Monitor	Study Director
NCT00559247	Bristol-Myers Squibb	Study Director
NCT00559273	Clinical Trials	Study Director
NCT00559299	GSK Clinical Trials	Study Director
NCT00559364	Aptalis Medical Information	Study Director
NCT00559533	Clinical Trials	Study Director
NCT00559585	Bristol-Myers Squibb	Study Director
NCT00559702	Medical Director	Study Director
NCT00560144	Clinical Trials	Study Director
NCT00560235	Pfizer CT.gov Call Center	Study Director
NCT00560391	Bristol-Myers Squibb	Study Director
[truncated: 5,055 more rows]

## Sheet: 3_Enrolling_Person
NCT Number	Last name	Role
NCT00384124	Nicole M Owens, MD	Principal Investigator
NCT00554840	Elaine Weiner, M.D.	Principal Investigator
NCT00564538	Wendy Grant, MD	Principal Investigator
NCT00582504	Ronald Reisler, MD	Principal Investigator
NCT00584805	Robert Rivard, MD	Principal Investigator
NCT00623168	Laura M Cashin, DO	Principal Investigator
NCT00634972	Fabien G Eyal, M.D.	Principal Investigator
NCT00787826	Anthony Cardile, DO	Principal Investigator
NCT00798590	Dariush Elahi, PhD	Principal Investigator
NCT00817557	Milton M Hom, OD FAAO	Principal Investigator
NCT00826020	David F Mercer, MD, PhD	Principal Investigator
NCT00869232	Frits van Rhee, MD, PhD	Principal Investigator
NCT00869713	Ronald Reisler, MD	Principal Investigator
NCT00896012	Mark R Laftavi, MD, FACS	Principal Investigator
NCT00896012	Oleh G. Pankewycz, MD	Principal Investigator
NCT00900497	Dipnarine Maharaj, MD	Principal Investigator
NCT00923715	Rubina A Heptulla, MD	Principal Investigator
NCT00936663	James T. Lane, MD	Principal Investigator
NCT00946309	Daniel W Lin, MD	Principal Investigator
NCT00950430	Val Lowe, M.D.	Principal Investigator
NCT00957190	Mark R Lesk, MSc,MD	Principal Investigator
NCT00972569	Dr Horng H Chen, MD	Principal Investigator
NCT00977028	Jeffrey A Klein, MD	Principal Investigator
NCT00992693	Elizabeth Rini, MD	Principal Investigator
NCT01066364	Rohit Loomba, MD, M.H.Sc	Principal Investigator
NCT01137773	Rainer Lenhardt, MD	Principal Investigator
NCT01156129	Laurel Williams, MSN,RN	Principal Investigator
NCT01216332	Natasha Halasa, M.D.	Principal Investigator
NCT01227226	Milton M Hom, OD FAAO	Principal Investigator
NCT01244737	Frederick D Grant, MD	Principal Investigator
NCT01247207	Edward O'Mara, MD	Study Director
NCT01248715	Julio A Ramirez, MD	Principal Investigator
NCT01280149	Paul A Greenberger, M.D.	Principal Investigator
NCT01288521	Sony Tuteja, PharmD	Principal Investigator
NCT01316770	Ilias G Alevizos, D.M.D.	Principal Investigator
NCT01337557	Milton M Hom, OD FAAO	Principal Investigator
NCT01365195	Roya Yumul, MD PhD	Principal Investigator
NCT01365195	Roya Yumul, MD., PhD	Study Director
NCT01404754	Michael M Mithoefer, MD	Principal Investigator
NCT01412359	Jeffrey A Rudolph, MD	Principal Investigator
NCT01453127	Bradley Boeve, MD	Principal Investigator
NCT01474785	Naji Abumrad, MD	Principal Investigator
NCT01474785	Robyn Tamboli, PhD	Study Director
NCT01479348	Karen A Kurdziel, M.D.	Principal Investigator
NCT01483248	Charlie Xiang, Professor	Principal Investigator
NCT01514175	Khalid Athar, MD	Principal Investigator
NCT01543750	Joanna C Jen, MD PhD	Principal Investigator
NCT01571817	Andrew M Posselt, M.D., Ph.D.	Principal Investigator
NCT01576783	Sarah Keim	Principal Investigator
NCT01589523	James E. Heubi, M.D.	Principal Investigator
NCT01589523	Kenneth D.R. Setchell, Ph.D.	Principal Investigator
NCT01592695	Mark VanderWeg, PhD	Principal Investigator
NCT01601652	Ian J Griffin, MD	Principal Investigator
NCT01630889	Lona Poole, MD	Study Director
NCT01662297	Albert J Arias, MD, MS	Principal Investigator
NCT01662297	Elizabeth Ralevski, Ph.D.	Study Director
NCT01665547	Alaa M Ismail, M.D	Principal Investigator
NCT01678872	Peter Campochiaro, MD	Principal Investigator
NCT01705899	Amer Rajab, MD, PhD	Principal Investigator
NCT01708707	Gregory Martin, MD	Principal Investigator
NCT01720316	Deborah L Levy, PhD	Principal Investigator
NCT01728636	Louanne M Carabini, MD	Principal Investigator
NCT01731236	Stanley L Hazen, MD, PhD	Principal Investigator
NCT01732718	Kenneth I Ataga, MBBS	Principal Investigator
NCT01736059	Susanna s Park, MD PhD	Principal Investigator
NCT01736592	David Wilson, MD	Principal Investigator
NCT01736592	José-Alain Sahel, MD	Principal Investigator
NCT01759407	Nicole Elsey, MD	Principal Investigator
NCT01769001	Einat Almon, PhD	Study Director
NCT01770236	Korey Zellner, PA-C	Principal Investigator
NCT01770236	Kym Culp, MD	Principal Investigator
NCT01770236	Prem Rabindra, MD	Principal Investigator
NCT01781936	Glenn J. Jaffe, MD	Principal Investigator
NCT01794897	Smita Deshpande, MD	Principal Investigator
NCT01794897	Vishwajit Nimgaonkar, MD, PhD	Principal Investigator
NCT01800526	Barbara A Konkle, M.D.	Principal Investigator
NCT01808521	Barbara A Konkle, MD	Principal Investigator
NCT01843504	John J. Wilson, MD, MS	Principal Investigator
NCT01843504	Kenneth S. Lee, MD	Principal Investigator
NCT01843504	Stephen J. Almasi, MD	Principal Investigator
NCT01843751	Randall T Brown, MD, PhD	Principal Investigator
NCT01854125	Fangyu Wang, MD/PhD	Study Director
NCT01854125	Fangyu Wang, MD/PhD	Study Director
NCT01854359	Bibiana Bielekova, M.D.	Principal Investigator
NCT01854723	Elizabeth Stephens, MD	Principal Investigator
NCT01868373	David Y Graham, MD	Principal Investigator
NCT01894308	Shern L. Chew, M.D., Ph.D.	Principal Investigator
NCT01903486	Karthik Ravi, MD	Principal Investigator
NCT01905202	Prateek Sharma, M.D.	Principal Investigator
NCT01928082	Murray J Favus, MD	Principal Investigator
NCT01936480	Christopher Newton-Cheh, MD, MPH	Principal Investigator
NCT01968798	Anne Murray, MD, MSc	Principal Investigator
NCT01968798	Richard Grimm, Jr., MD, PhD	Principal Investigator
NCT01979965	Raj Baljepally, MD	Principal Investigator
NCT01981720	Einat Almon, PhD	Study Chair
NCT02000388	Edward L Davis, M.D.	Principal Investigator
NCT02011750	Hader Mansour, MD	Principal Investigator
NCT02012465	Anna Roshal, MD	Principal Investigator
NCT02012465	Garry Tobin, MD	Principal Investigator
NCT02013037	Jignesh Patel, M.D., Ph.D.	Principal Investigator
NCT02013128	Jeff Sharman, MD	Study Chair
NCT02022644	Nicholas Butowski, MD	Principal Investigator
NCT02022644	Susan Chang, MD	Study Director
NCT02023866	Bruce H. Cohen, MD	Principal Investigator
NCT02025855	Thomas L Smoot, PharmD	Principal Investigator
NCT02029846	Hsin-Chieh Yeh, PhD	Principal Investigator
NCT02051062	Christine Hall, PhD	Study Chair
NCT02051062	Jason S Richardson, PhD	Study Chair
NCT02051062	Matt Cromie, MSc	Study Chair
NCT02054052	Haihong Yang, MD	Principal Investigator
NCT02065011	Richard Weleber, MD	Principal Investigator
NCT02065700	Pille Harrison, MD	Study Director
NCT02072668	Kenneth I Ataga, MBBS	Principal Investigator
NCT02082717	Mavel Arinal, RN	Principal Investigator
NCT02090959	Robert Spiegel, M.D.	Study Director
NCT02108002	Prashant Chittiboina, M.D.	Principal Investigator
NCT02114697	John Oshinski, PhD	Principal Investigator
NCT02124265	Stephen M Milner, MBBS	Principal Investigator
NCT02124746	Caroline Roudet, PharmD	Study Director
NCT02126020	Claes H Dohlman, MD, PhD	Study Chair
NCT02126020	James Chodosh, MD, MPH	Principal Investigator
NCT02126020	Marie-Claude Robert, MD	Study Chair
NCT02126020	Mona Harissi-Dagher, MD	Study Chair
NCT02127892	Neena Kapoor, M.D.	Principal Investigator
NCT02138331	Abdelnaser A Saad, MSc	Principal Investigator
NCT02138331	Heba A Ghaffar, MSc	Principal Investigator
NCT02138331	Marwa Mohammad, MSc	Principal Investigator
NCT02138331	Mervat El Ansary, MD	Study Director
NCT02138331	Mosaad A Hamid, MD	Principal Investigator
NCT02138331	Sameh Shawki, MSc	Principal Investigator
NCT02138331	Tamer Shehab, MRCP	Principal Investigator
NCT02138331	Wael F Nassar, MD	Study Chair
NCT02138331	Wael M Esa, MSc	Principal Investigator
NCT02141399	Sanjeev Pathak, MD	Study Director
NCT02149537	Bamidele O Tayo, PhD	Principal Investigator
NCT02149537	Lewis Hsu, MD	Principal Investigator
NCT02149537	Richard S Cooper, MD	Principal Investigator
NCT02149537	Titilola S Akingbola, MBBS, FWACP	Principal Investigator
NCT02149537	Victor R Gordeuk, MD	Principal Investigator
NCT02151903	Daniel Vlock, MD	Study Director
NCT02155309	Willliam J Becker, Phd	Principal Investigator
NCT02174848	Elliott Vichinsky, MD	Principal Investigator
NCT02174848	Nardo Nardocci, MD	Principal Investigator
NCT02174848	Patrick Chinnery, MD	Principal Investigator
NCT02174848	Thomas Klopstock, MD	Principal Investigator
NCT02178553	James D Hannon, MD	Principal Investigator
NCT02179255	David H Barad, MD	Principal Investigator
NCT02179255	Norbert Gleicher	Study Chair
NCT02182115	Susan E Kline, MD, MPH	Principal Investigator
NCT02185014	Alexandra Song, MD	Study Director
NCT02195895	Thomas J Schnitzer, MD, PhD	Principal Investigator
NCT02203799	Carla M Davis, MD	Principal Investigator
NCT02214160	Jason Cataldo, DO	Study Director
NCT02214615	Stephen Waxman, MD, PhD	Principal Investigator
NCT02219906	John A Oates, MD	Principal Investigator
NCT02225132	Courtney D Fitzhugh, M.D.	Principal Investigator
NCT02235844	Maurice HV Strickland, MD	Principal Investigator
NCT02239562	Christopher B. O'Brien, MD, AGAF, FRMCI	Principal Investigator
NCT02241460	Eugene Y Rhee, MD, MBA	Principal Investigator
NCT02243124	Rami Komrokji, MD	Principal Investigator
NCT02247973	Yang Xiao, MD	Study Chair
NCT02251938	Lanita Scott, MD	Study Director
NCT02262806	Rebecca J Brown, M.D.	Principal Investigator
NCT02262832	Rebecca J Brown, M.D.	Principal Investigator
NCT02265575	Brett D. Nelson, MD,MPH,DTM&amp;H	Principal Investigator
NCT02270606	Emma C Fields, MD	Principal Investigator
NCT02271698	Stuart A Grant, MB ChB	Principal Investigator
NCT02289365	Cheng-Ying Shiau, MD	Principal Investigator
NCT02289365	Chih-Jen Huang, MD-PhD	Principal Investigator
NCT02289365	Chin-Nan Chu, MD	Principal Investigator
NCT02290444	Ralph HB Benedict, PhD	Principal Investigator
NCT02297204	Rahul Khurana, MD	Principal Investigator
NCT02297256	Peter Passias, MD	Principal Investigator
NCT02299271	Brian Vaughan, MD	Principal Investigator
NCT02318433	Sanjeev Kakar, M.D., M.B.A	Principal Investigator
NCT02324725	Daniel Langleben, MD	Principal Investigator
NCT02347813	Alice P. Pentland, M.D.	Principal Investigator
NCT02352896	Bruce Cohen, MD	Principal Investigator
NCT02363439	Mark Cornfeld, MD, MPH	Study Director
NCT02368756	W. Lloyd Clark, MD	Principal Investigator
NCT02430363	Jann Lee, PhD	Principal Investigator
NCT02474472	Kristofer M Charlton-Ouw, MD	Principal Investigator
NCT02497911	Jaime L Baratta, MD	Principal Investigator
NCT02566577	Arshed Quyyumi, MD, FACC	Principal Investigator
NCT02575638	Zhisong Cao, Ph. D.	Principal Investigator
NCT02597712	Julian A Abrams, MD MS	Principal Investigator
NCT02604134	Arwa I Owais, BDS, MS	Principal Investigator
NCT02604134	MIchael Kanellis, DDS, MS	Principal Investigator
NCT02694653	Craig V. Towers, MD	Principal Investigator
NCT02702505	Carolyn A Kerins, DDS, PhD	Principal Investigator

## Sheet: 3_Enrolling_NonPerson
NCT Number	Last name	Role
NCT00781612	Clinical Trials	Study Director
NCT00938912	UCB Cares	Study Director
NCT01364597	UCB Clinical Trial Call Center	Study Director
NCT01454739	Medical Director	Study Director
NCT01804686	Janssen Research &amp; Development, LLC Clinical Trial	Study Director
NCT01949311	Clinical Trial Management	Study Director
NCT01964560	UCB Cares	Study Director
NCT02051764	Chief Medical Officer	Study Chair
NCT02055157	Medical Director, MD	Study Director
NCT02079246	Email contact via H. Lundbeck A/S	Study Director
NCT02137850	Global Clinical Registry (GCR, 1452)	Study Director

## Sheet: 4_Recruiting_Person
NCT Number	Last name	Role
NCT00006205	Bankole Johnson, DSc, MD, PhD	Principal Investigator
NCT00006205	Bankole Johnson, DSc, MD, PhD	Principal Investigator
NCT00006205	Bankole Johnson, DSc, MD, PhD	Principal Investigator
NCT00006205	Nassima Ait-Daoud Tiouririne, MD	Sub-Investigator
NCT00006205	Nassima Ait-Daoud Tiouririne, MD	Sub-Investigator
NCT00100165	Robert Freedman, MD	Principal Investigator
NCT00100165	Robert Freedman, MD	Principal Investigator
NCT00117728	Louise Kuhn, Ph.D.	Principal Investigator
NCT00121095	Michael J Morris, M.D.	Principal Investigator
NCT00121095	Michael J Morris, MD	Principal Investigator
NCT00124358	Ruth Finkelstein, ScD	Principal Investigator
NCT00124358	Chinazo Cunningham, MD	Principal Investigator
NCT00124358	David Barker, MD	Sub-Investigator
NCT00124358	David Fiellin, MD	Principal Investigator
NCT00124358	Dennis McCarty, PhD	Sub-Investigator
NCT00124358	Diana Sylvestre	Principal Investigator
NCT00124358	Frederick Altice, MD	Principal Investigator
NCT00124358	Greg Lucas, MD, PhD	Principal Investigator
NCT00124358	Jacqueline Tulsky, MD	Principal Investigator
NCT00124358	Jeanne Keruly, CRNP	Sub-Investigator
NCT00124358	Jeffrey Hsu, MD	Sub-Investigator
NCT00124358	Jeffrey Watts, MD	Principal Investigator
NCT00124358	Kevin Carmichael, MD	Principal Investigator
NCT00124358	Lisa Metsch, PhD	Principal Investigator
NCT00124358	Lynn Sullivan, MD	Principal Investigator
NCT00124358	Margaret Fischl, MD	Principal Investigator
NCT00124358	Nancy Sohler, PhD, MPH	Sub-Investigator
NCT00124358	P. Todd Korthuis, MD, MPH	Principal Investigator
NCT00124358	Paula Lum, MD, MPH	Principal Investigator
NCT00124358	Peter Friedman, MD, MPH	Sub-Investigator
NCT00124358	Richard Moore, MD	Sub-Investigator
NCT00124358	Timothy Flanigan, MD	Principal Investigator
NCT00124358	William Ruby, DO	Sub-Investigator
NCT00124358	Yngveld Olsen, MD	Sub-Investigator
NCT00132821	Gary Swan	Principal Investigator
NCT00133406	Richard L Guerrant, MD	Principal Investigator
NCT00148083	Steven M Silverstein, Ph.D.	Principal Investigator
NCT00148083	Adam Savitz, M.D., Ph.D.	Principal Investigator
NCT00148083	Steven M Silverstein, Ph.D.	Principal Investigator
NCT00183391	Jeffrey H. Newcorn, MD	Principal Investigator
NCT00183391	Edwin Cook, MD	Principal Investigator
NCT00183391	Elizabeth Charney, MD	Principal Investigator
NCT00183391	Jeffrey H. Newcorn, MD	Principal Investigator
NCT00183391	Mark A. Stein, PhD	Principal Investigator
NCT00183391	Mark A. Stein, PhD	Principal Investigator
NCT00186927	Elisabeth Adderson, MD	Principal Investigator
NCT00186927	Elisabeth Adderson, MD	Principal Investigator
NCT00199875	Robert Motzer, MD	Principal Investigator
NCT00199875	Joseph O'Donoghue, PhD	Principal Investigator
NCT00199875	Joseph O'Donoghue, PhD	Principal Investigator
NCT00199875	Neeta Pandit-Taskar, M D	Principal Investigator
NCT00199875	Neeta Pandit-Taskar, MD	Principal Investigator
NCT00199875	Robert Mozter, MD	Principal Investigator
NCT00199875	Steve Larson, MD	Principal Investigator
NCT00199875	Steve Larson, MD	Principal Investigator
NCT00202930	Jean M Tersak, M.D.	Principal Investigator
NCT00202930	Jean M Tersak, MD	Principal Investigator
NCT00218023	Joy Schmitz, PhD	Principal Investigator
NCT00218036	Joy M Schmitz, PhD	Principal Investigator
NCT00218036	F. Gerard Moeller, M.D.	Study Chair
NCT00218036	Richard Meisch, MD, PhD	Principal Investigator
NCT00219869	Alan Rapoport, MD	Principal Investigator
NCT00219869	Alan Rapoport, MD	Principal Investigator
NCT00219869	Fred Sheftell, MD	Sub-Investigator
NCT00219869	Marcelo Bigal, MD, PhD	Sub-Investigator
NCT00219869	Stewart Tepper, MD	Sub-Investigator
NCT00229918	Felipe de Alba, MD	Principal Investigator
NCT00229918	Anuradha Khanna, MD	Principal Investigator
NCT00229918	Anuradha Khanna, MD	Principal Investigator
NCT00229918	Felipe de Alba, MD	Principal Investigator
NCT00229918	John Galasso, MD, PhD	Sub-Investigator
NCT00244218	Reuben Matalon, MD, PhD	Principal Investigator
NCT00244218	Reuben Matalon, MD, PHD	Principal Investigator
NCT00246727	Henry S Sacks, MD, Ph.D	Principal Investigator
NCT00246727	Henry S Sacks, MD, Ph.D	Principal Investigator
NCT00252174	John H Halpern, MD	Principal Investigator
NCT00252174	John H Halpern, MD	Principal Investigator
NCT00257738	Martin J. Edelman, MD	Principal Investigator
NCT00257738	Martin J. Edelman, MD	Principal Investigator
NCT00267865	Robert Yarchoan, M.D.	Principal Investigator
NCT00271063	Gary Jacob, PhD	Study Director
NCT00271063	Hagop Kantarjian, MD	Principal Investigator
NCT00271063	Meir Wetzler, MD	Principal Investigator
NCT00271063	Samir Parekh, MD	Principal Investigator
NCT00273364	Richard Burt, MD	Principal Investigator
NCT00273364	Richard Burt, MD	Principal Investigator
NCT00274170	Alex Rosin, MD	Principal Investigator
NCT00275509	Robert A Montgomery, M.D., Ph.D.	Principal Investigator
NCT00275509	Andrea A Zachary, Ph.D.	Sub-Investigator
NCT00275509	Christopher E Simpkins, M.D.	Study Director
NCT00275509	Christopher E Simpkins, M.D.	Sub-Investigator
NCT00275509	Daniel Warren, Ph.D.	Sub-Investigator
NCT00275509	Jayme Locke, M.D.	Sub-Investigator
NCT00275509	Mark Haas, M.D., Ph.D.	Sub-Investigator
NCT00275509	Mary S. Leffell, Ph.D.	Sub-Investigator
NCT00275509	Robert A Montgomery, M.D., Ph.D.	Principal Investigator
NCT00281502	Sam Sigal, M.D.	Principal Investigator
NCT00281502	Brian P. Bosworth, M.D.	Sub-Investigator
NCT00281502	Ilan Weisberg, M.D.	Sub-Investigator
NCT00281502	Sam Sigal, M.D.	Principal Investigator
NCT00282620	Jeffrey Kluger, MD	Principal Investigator
NCT00282620	Charles M White, PharmD	Sub-Investigator
NCT00282620	Christopher A Clyne, MD	Sub-Investigator
NCT00282620	Craig I Coleman, PharmD	Sub-Investigator
NCT00282620	Effie L Gillespie, PharmD	Sub-Investigator
NCT00282620	Jeffrey Kluger, MD	Principal Investigator
NCT00282620	Nickole N Henyan, PharmD	Sub-Investigator
NCT00282620	Stephen D Sander, PharmD	Sub-Investigator
NCT00282620	William L Baker, PharmD	Sub-Investigator
NCT00282659	Charles M White, PharmD	Principal Investigator
NCT00282659	Charles M White, PharmD	Principal Investigator
NCT00282659	Christopher A Clyne, MD	Sub-Investigator
NCT00282659	Craig I Coleman, PharmD	Sub-Investigator
NCT00282659	Effie L Gillespie, PharmD	Sub-Investigator
NCT00282659	Jeffrey Kluger, MD	Sub-Investigator
NCT00282659	Nickole N Henyan, PharmD	Sub-Investigator
NCT00282659	Stephen D Sander, PharmD	Sub-Investigator
NCT00285935	Owen Wolkowitz, MD	Principal Investigator
NCT00290823	Theodore E. Nash, MD	Principal Investigator
NCT00290823	Hector H. Garcia, MD, PhD	Principal Investigator
NCT00290823	Hector H. Garcia, MD, PhD	Study Director
NCT00290823	Theodore E. Nash, MD	Principal Investigator
NCT00292955	Linda R. Duska, M.D.	Principal Investigator
NCT00293475	Edward Neuwelt	Principal Investigator
NCT00293475	David M. Peereboom	Principal Investigator
NCT00293475	Edward A. Neuwelt	Principal Investigator
NCT00293475	Edward A. Neuwelt	Principal Investigator
NCT00293475	Edward A. Neuwelt	Principal Investigator
NCT00293475	Robert E. Albright	Principal Investigator
NCT00300495	Malcolm M DeCamp, MD	Principal Investigator
NCT00300495	Malcolm M DeCamp, MD	Principal Investigator
NCT00302692	Randall Friese, MD	Principal Investigator
NCT00302692	Randall Friese, MD	Principal Investigator
NCT00303849	Edward Neuwelt	Principal Investigator
NCT00303849	Edward A. Neuwelt	Principal Investigator
NCT00303849	Matthew A. Hunt	Principal Investigator
NCT00304707	David Kalman, PhD	Principal Investigator
NCT00305682	Claudio G. Brunstein, MD, PhD	Principal Investigator
NCT00309842	Claudio G. Brunstein, MD, PhD	Study Chair
NCT00314821	Robert T Dunn, MD,PhD	Principal Investigator
NCT00319228	Paul J Pinciaro, PhD	Study Director
NCT00319878	Ronald Paquette, MD	Principal Investigator
NCT00319878	Alan List, MD	Principal Investigator
NCT00319878	Hussain Saba, MD	Principal Investigator
NCT00319878	Jaroslaw P. Maciejewski, MD	Principal Investigator
NCT00319878	Mikkael Sekeres, MD	Principal Investigator
NCT00319878	Thomas Loughran, MD	Principal Investigator
NCT00321555	Robert J Kreitman, M.D.	Principal Investigator
NCT00338377	Patrick Hwu, MD	Principal Investigator
NCT00338377	Patrick Hwu, MD	Principal Investigator
NCT00345345	Stefan F Cordes, M.D.	Principal Investigator
NCT00345865	Veronika Bachanova, MD	Principal Investigator
NCT00352976	Margaret L MacMillan, M.D.	Principal Investigator
NCT00353379	Larry J. Siever, MD	Principal Investigator
NCT00356031	Yen-Lin Chen, MD	Principal Investigator
NCT00357331	Naina Sinha, M.D.	Principal Investigator
NCT00357331	Naina Sinha, M.D.	Principal Investigator
NCT00357565	Michael R. Verneris, MD	Principal Investigator
NCT00357565	Michael R. Verneris, M.D.	Principal Investigator
NCT00358657	Lauri Burroughs	Principal Investigator
NCT00358657	Haydar A. Frangoul	Principal Investigator
NCT00358657	Lauri M. Burroughs	Principal Investigator
NCT00363649	B. Douglas Smith, MD	Principal Investigator
NCT00373399	Margaret Haney, Ph.D.	Principal Investigator
NCT00373399	Efrat Aharonovich, Ph.D.	Principal Investigator
NCT00373399	Margaret Haney, Ph.D.	Principal Investigator
NCT00378638	Linnea I. Chap, MD	Principal Investigator
NCT00378638	Linnea I. Chap, M.D.	Principal Investigator
NCT00382265	Andrew C Meltzer, MD	Principal Investigator
NCT00382265	Allan B Wolfson, MD	Principal Investigator
NCT00382265	Andrew C Meltzer, MD	Principal Investigator
NCT00382265	Judd Hollander, MD	Principal Investigator
NCT00382265	Thomas Jarrett, MD	Sub-Investigator
NCT00390299	Evanthia Galanis	Principal Investigator
NCT00390299	Evanthia Galanis	Principal Investigator
NCT00391170	Sawa Ito, M.D.	Principal Investigator
NCT00392327	James Olson, MD, PhD	Principal Investigator
NCT00392327	Carol Portwine	Principal Investigator
NCT00392327	Janice F. Olson	Principal Investigator
NCT00392327	Jeffrey S. Lobel	Principal Investigator
NCT00392327	Nichole L. Bryant	Principal Investigator
NCT00392327	Peter G. Steinherz	Principal Investigator
NCT00392327	Steven L. Halpern	Principal Investigator
NCT00397735	Catalin S Buhimschi, MD	Principal Investigator
NCT00397813	Brenda Sandmaier	Principal Investigator
NCT00397813	Brenda M. Sandmaier	Principal Investigator
NCT00397813	Finn B. Petersen	Principal Investigator
NCT00397813	Thomas R. Chauncey	Principal Investigator
NCT00398034	David AN Siegel, M.D.	Principal Investigator
NCT00398034	Ann Spungen, Ed.D	Sub-Investigator
NCT00398034	Christopher Cardoza, M.D.	Sub-Investigator
NCT00398034	David AN Siegel, M.D.	Principal Investigator
NCT00398034	William Bauman, M.D.	Sub-Investigator
NCT00399243	Seymour Diamond, MD	Principal Investigator
NCT00399243	Betsy Pepper, MD	Sub-Investigator
NCT00399243	Fred G Freitag, DO	Sub-Investigator
NCT00399243	George Nissan, DO	Sub-Investigator
NCT00399243	George Urban, MD	Sub-Investigator
NCT00399243	Merle Diamond, MD	Sub-Investigator
NCT00405847	Sairam Parthasarathy, MD	Principal Investigator
NCT00405847	Sairam Parthasarathy, MD	Principal Investigator
NCT00406094	Jonathan A Bernstein, MD	Principal Investigator
NCT00406094	Jonathan A Bernstein, MD	Principal Investigator
NCT00408525	Harry E Gwirtsman, M.D.	Principal Investigator
NCT00408525	Harry E Gwirtsman, M.D.	Principal Investigator
NCT00418262	Thomas M Lock, M.D.	Principal Investigator
NCT00418262	Laura J McGuinn, M.D.	Sub-Investigator
NCT00418262	Mark L Wolraich, M.D.	Sub-Investigator
NCT00418262	Thomas M Lock, M.D.	Principal Investigator
NCT00418457	Daniel I Sessler, MD	Principal Investigator
NCT00418457	Donal J Buggy, MD	Principal Investigator
NCT00418457	Edith Fleischmann, MD	Principal Investigator
NCT00418457	Tanja A Meyer-Treschan, M.D.	Principal Investigator
NCT00419731	Marc E Mooney, Ph.D.	Principal Investigator
NCT00419731	Marc E Mooney, Ph.D.	Principal Investigator
NCT00426517	Elizabeth M Kang, M.D.	Principal Investigator
NCT00432094	Brian McClune, DO	Principal Investigator
NCT00432549	Fred D Sheftell, M.D.	Principal Investigator
NCT00432549	Fred D Sheftell, M.D.	Principal Investigator
NCT00441818	Anas Younes, MD	Principal Investigator
NCT00441818	Anas Younes, MD	Principal Investigator
NCT00441818	Craig Moskowitz, MD	Principal Investigator
NCT00441818	Craig Moskowitz, MD	Principal Investigator
NCT00444964	Merlin G Butler, MD	Principal Investigator
NCT00444964	Merlin G Butler, MD	Principal Investigator
NCT00445354	Paul F Crawford, MD	Principal Investigator
NCT00445354	Karen L Weis, PhD	Sub-Investigator
NCT00445354	Paul F Crawford, MD	Principal Investigator
NCT00448071	Zeev Katzir, MD	Principal Investigator
NCT00448071	Shay Efrati, MD	Principal Investigator
NCT00448071	Shay Efrati, MD	Principal Investigator
NCT00448071	Zeev Katzir, MD	Principal Investigator
NCT00448825	Bankole Johnson, DSc, MD, PhD	Principal Investigator
NCT00448825	Bankole Johnson, DSc,MD,PhD	Principal Investigator
NCT00448825	Bankole Johnson, DSc,MD,PhD	Principal Investigator
NCT00448825	Nassima Ait-Daoud, MD	Sub-Investigator
NCT00448825	Nassima Ait-Daoud, MD	Sub-Investigator
NCT00450814	Angela Dispenzieri	Principal Investigator
NCT00450814	Angela Dispenzieri	Principal Investigator
NCT00451672	Kwan-Dun Wu, MD, PhD	Principal Investigator
NCT00451672	Vin-Cent Wu, MD	Study Director
NCT00455104	Michael L West, MD	Principal Investigator
NCT00455104	Aneal Khan, MD	Principal Investigator
NCT00455104	Daniel Bichet, MD	Principal Investigator
NCT00455104	Mark R Iwanochko, MD, FRCPC	Principal Investigator
NCT00455104	Michael L West, MD	Principal Investigator
NCT00455104	Sandra Sirrs, MD, FRCPC	Principal Investigator
NCT00461773	Gina Chung, M.D.	Principal Investigator
NCT00466128	Jolene S Seibel-Seamon, MD	Principal Investigator
NCT00466128	Jolene S Seibel-Seamon, MD	Principal Investigator
NCT00466531	Jae Park, MD	Principal Investigator
NCT00466843	Alan List, MD	Principal Investigator
NCT00466843	Alan List, MD	Principal Investigator
NCT00466843	Jaroslaw P. Maciejewski, MD, PhD	Principal Investigator
NCT00466843	Ronald Paquette, MD	Principal Investigator
NCT00466843	Thomas P. Loughran, Jr., MD	Principal Investigator
NCT00472186	Manali Amin, MD	Principal Investigator
NCT00472186	Manali Amin, MD	Principal Investigator
NCT00472329	Mark W Brunvand, MD	Principal Investigator
NCT00472329	Jeffrey V Matous, MD	Sub-Investigator
NCT00472329	Mark W Brunvand, MD	Principal Investigator
NCT00472329	Michael B Maris, MD	Sub-Investigator
NCT00472329	Peter A McSweeney, MD	Sub-Investigator
NCT00472329	Robert M Rifkin, MD	Sub-Investigator
NCT00472329	Scott I Bearman, MD	Sub-Investigator
NCT00479193	Charles Yowler, MD	Principal Investigator
NCT00479193	Charles Yowler, MD	Principal Investigator
NCT00479596	Leonard S Marks, M.D.	Principal Investigator
NCT00479596	Leonard S Marks, M.D.	Principal Investigator
NCT00484874	Richard L Wahl, MD	Principal Investigator
NCT00484874	Donna Serena, RN	Sub-Investigator
NCT00484874	Eric Frey, PhD	Sub-Investigator
NCT00484874	George Sgouros, PhD	Sub-Investigator
NCT00484874	Heather A Jacene, MD	Sub-Investigator
NCT00484874	Richard Ambinder, MD, PhD	Sub-Investigator
NCT00484874	Richard L Wahl, MD	Principal Investigator
NCT00484874	Steven Piantadosi, MD, PhD	Sub-Investigator
NCT00484874	Wayne Kasecamp, CNMT	Sub-Investigator
NCT00484874	Yvette Kasamon, MD	Sub-Investigator
NCT00489281	Javier Bolanos-Meade, MD	Study Chair
NCT00491790	Jeffrey L. Blumer, M.D., Ph.D.	Principal Investigator
NCT00491790	Jeffrey Blumer, Ph.D., M.D.	Principal Investigator
NCT00492778	Jonathan Feddock	Principal Investigator
NCT00492778	Ahmad Raza	Principal Investigator
NCT00492778	Ahmad Raza	Principal Investigator
NCT00492778	Akm Mosharraf Hossain	Principal Investigator
NCT00492778	Alcee J. Jumonville	Principal Investigator
NCT00492778	Ali Mahdavi	Principal Investigator
NCT00492778	Ali Mahdavi	Principal Investigator
NCT00492778	Alison K. Conlin	Principal Investigator
NCT00492778	Alyson F. McIntosh	Principal Investigator
NCT00492778	Andrew E. Green	Principal Investigator
NCT00492778	Andrew P. Soisson	Principal Investigator
NCT00492778	Benjamin T. Marchello	Principal Investigator
NCT00492778	Benjamin T. Marchello	Principal Investigator
NCT00492778	Benjamin T. Marchello	Principal Investigator
NCT00492778	Benjamin T. Marchello	Principal Investigator
NCT00492778	Benjamin T. Marchello	Principal Investigator
NCT00492778	Benjamin T. Marchello	Principal Investigator
NCT00492778	Benjamin T. Marchello	Principal Investigator
NCT00492778	Benjamin T. Marchello	Principal Investigator
NCT00492778	Benjamin T. Marchello	Principal Investigator
NCT00492778	Benjamin T. Marchello	Principal Investigator
NCT00492778	Benjamin T. Marchello	Principal Investigator
NCT00492778	Benjamin T. Marchello	Principal Investigator
NCT00492778	Benjamin T. Marchello	Principal Investigator
NCT00492778	Benjamin T. Marchello	Principal Investigator
NCT00492778	Benjamin T. Marchello	Principal Investigator
NCT00492778	Benjamin T. Marchello	Principal Investigator
NCT00492778	Benjamin T. Marchello	Principal Investigator
NCT00492778	Benjamin T. Marchello	Principal Investigator
NCT00492778	Bernice L. Robinson-Bennett	Principal Investigator
NCT00492778	Brian R. Knab	Principal Investigator
NCT00492778	Cheung Wong	Principal Investigator
NCT00492778	Christopher J. Darus	Principal Investigator
NCT00492778	Christopher J. Darus	Principal Investigator
NCT00492778	Daniel E. Lehane	Principal Investigator
NCT00492778	Daniel E. Lehane	Principal Investigator
NCT00492778	David F. Silver	Principal Investigator
NCT00492778	David G. Mutch	Principal Investigator
NCT00492778	David M. Kushner	Principal Investigator
NCT00492778	David M. O'Malley	Principal Investigator
NCT00492778	David M. Spector	Principal Investigator
NCT00492778	David M. Spector	Principal Investigator
NCT00492778	David M. Spector	Principal Investigator
NCT00492778	David M. Spector	Principal Investigator
NCT00492778	David P. Bender	Principal Investigator
NCT00492778	David P. Warshal	Principal Investigator
NCT00492778	David P. Warshal	Principal Investigator
NCT00492778	Donald B. Wender	Principal Investigator
NCT00492778	Frederick R. Ueland	Principal Investigator
NCT00492778	Giles Fort	Principal Investigator
NCT00492778	Guilherme Henrique C. Cantuaria	Principal Investigator
NCT00492778	Higinia R. Cardenes Perera	Principal Investigator
NCT00492778	Jack B. Basil	Principal Investigator
NCT00492778	James C. Pavelka	Principal Investigator
NCT00492778	James C. Pavelka	Principal Investigator
NCT00492778	James E. Clarkson	Principal Investigator
NCT00492778	James J. Burke	Principal Investigator
NCT00492778	James N. Atkins	Principal Investigator
NCT00492778	James N. Atkins	Principal Investigator
NCT00492778	James N. Atkins	Principal Investigator
NCT00492778	James N. Atkins	Principal Investigator
NCT00492778	James N. Atkins	Principal Investigator
NCT00492778	James T. Thigpen	Principal Investigator
NCT00492778	James V. Fiorica	Principal Investigator
NCT00492778	Jay W. Carlson	Principal Investigator
NCT00492778	Jay W. Carlson	Principal Investigator
NCT00492778	Jeffrey W. Elder	Principal Investigator
NCT00492778	Jeffrey W. Elder	Principal Investigator
NCT00492778	Jeffrey W. Elder	Principal Investigator
NCT00492778	Jeffrey W. Elder	Principal Investigator
NCT00492778	Jeffrey W. Elder	Principal Investigator
NCT00492778	Jeffrey W. Elder	Principal Investigator
NCT00492778	Jeffrey W. Elder	Principal Investigator
NCT00492778	Jeffrey W. Elder	Principal Investigator
NCT00492778	Jeffrey W. Elder	Principal Investigator
NCT00492778	Jessica Zhou	Principal Investigator
NCT00492778	John A. Ellerton	Principal Investigator
NCT00492778	John A. Ellerton	Principal Investigator
NCT00492778	John A. Ellerton	Principal Investigator
NCT00492778	John A. Ellerton	Principal Investigator
NCT00492778	John A. Ellerton	Principal Investigator
NCT00492778	John A. Ellerton	Principal Investigator
NCT00492778	John A. Ellerton	Principal Investigator
NCT00492778	John A. Ellerton	Principal Investigator
NCT00492778	John A. Ellerton	Principal Investigator
NCT00492778	John A. Ellerton	Principal Investigator
NCT00492778	John A. Ellerton	Principal Investigator
NCT00492778	John A. Ellerton	Principal Investigator
NCT00492778	John A. Ellerton	Principal Investigator
NCT00492778	John A. Ellerton	Principal Investigator
NCT00492778	John A. Ellerton	Principal Investigator
NCT00492778	John A. Ellerton	Principal Investigator
NCT00492778	John A. Ellerton	Principal Investigator
NCT00492778	John A. Ellerton	Principal Investigator
NCT00492778	John A. Ellerton	Principal Investigator
NCT00492778	John A. Ellerton	Principal Investigator
NCT00492778	John A. Ellerton	Principal Investigator
NCT00492778	John A. Ellerton	Principal Investigator
NCT00492778	John A. Ellerton	Principal Investigator
NCT00492778	John A. Ellerton	Principal Investigator
NCT00492778	John A. Ellerton	Principal Investigator
NCT00492778	John K. Chan	Principal Investigator
NCT00492778	John K. Chan	Principal Investigator
NCT00492778	John K. Chan	Principal Investigator
NCT00492778	John K. Chan	Principal Investigator
NCT00492778	John K. Chan	Principal Investigator
NCT00492778	John K. Chan	Principal Investigator
NCT00492778	John K. Chan	Principal Investigator
NCT00492778	John K. Chan	Principal Investigator
NCT00492778	John K. Chan	Principal Investigator
NCT00492778	John K. Chan	Principal Investigator
NCT00492778	John K. Chan	Principal Investigator
NCT00492778	John K. Chan	Principal Investigator
NCT00492778	John K. Chan	Principal Investigator
NCT00492778	John K. Chan	Principal Investigator
NCT00492778	John K. Chan	Principal Investigator
NCT00492778	John K. Chan	Principal Investigator
NCT00492778	John K. Chan	Principal Investigator
NCT00492778	John K. Chan	Principal Investigator
NCT00492778	John K. Chan	Principal Investigator
NCT00492778	John K. Chan	Principal Investigator
NCT00492778	John K. Chan	Principal Investigator
NCT00492778	John M. McDonald	Principal Investigator
NCT00492778	John O. Schorge	Principal Investigator
NCT00492778	John P. Kuebler	Principal Investigator
NCT00492778	John P. Kuebler	Principal Investigator
NCT00492778	John P. Kuebler	Principal Investigator
NCT00492778	John P. Kuebler	Principal Investigator
NCT00492778	John P. Kuebler	Principal Investigator
NCT00492778	John P. Kuebler	Principal Investigator
NCT00492778	John P. Kuebler	Principal Investigator
NCT00492778	John P. Kuebler	Principal Investigator
NCT00492778	John P. Kuebler	Principal Investigator
NCT00492778	John P. Kuebler	Principal Investigator
NCT00492778	John P. Kuebler	Principal Investigator
NCT00492778	John P. Kuebler	Principal Investigator
NCT00492778	John P. Kuebler	Principal Investigator
NCT00492778	John P. Kuebler	Principal Investigator
NCT00492778	John P. Kuebler	Principal Investigator
NCT00492778	John P. Kuebler	Principal Investigator
NCT00492778	John P. Kuebler	Principal Investigator
NCT00492778	John P. Kuebler	Principal Investigator
NCT00492778	John P. Kuebler	Principal Investigator
NCT00492778	John P. Kuebler	Principal Investigator
NCT00492778	John P. Kuebler	Principal Investigator
NCT00492778	John P. Kuebler	Principal Investigator
NCT00492778	John P. Kuebler	Principal Investigator
NCT00492778	Jonathan E. Tammela	Principal Investigator
NCT00492778	Jonathan E. Tammela	Principal Investigator
NCT00492778	Jonathan E. Tammela	Principal Investigator
NCT00492778	Jonathan E. Tammela	Principal Investigator
NCT00492778	Joyce Varughese	Principal Investigator
NCT00492778	Larry C. Kilgore	Principal Investigator
NCT00492778	LaToya J. Perry	Principal Investigator
NCT00492778	LaToya J. Perry	Principal Investigator
NCT00492778	Leslie R. DeMars	Principal Investigator
NCT00492778	Luis A. Rojas-Espaillat	Principal Investigator
NCT00492778	Mark A. Miller	Principal Investigator
NCT00492778	Mark A. Miller	Principal Investigator
NCT00492778	Mark A. Miller	Principal Investigator
NCT00492778	Mark A. Miller	Principal Investigator
NCT00492778	Mark E. Borowsky	Principal Investigator
NCT00492778	Mark E. Borowsky	Principal Investigator
NCT00492778	Mark E. Borowsky	Principal Investigator
NCT00492778	Mark E. Borowsky	Principal Investigator
NCT00492778	Mark E. Borowsky	Principal Investigator
NCT00492778	Mark E. Borowsky	Principal Investigator
NCT00492778	Mark E. Borowsky	Principal Investigator
NCT00492778	Mark E. Borowsky	Principal Investigator
NCT00492778	Mark E. Borowsky	Principal Investigator
NCT00492778	Mark E. Borowsky	Principal Investigator
NCT00492778	Mary J. Cunningham	Principal Investigator
NCT00492778	Matthew M. Harkenrider	Principal Investigator
NCT00492778	Michael P. Hopkins	Principal Investigator
NCT00492778	Mildred R. Chernofsky	Principal Investigator
NCT00492778	Nguyet A. Le-Lindqwister	Principal Investigator
NCT00492778	Nicola M. Spirtos	Principal Investigator
NCT00492778	Noah A. Goldman	Principal Investigator
NCT00492778	Noah A. Goldman	Principal Investigator
NCT00492778	Noah A. Goldman	Principal Investigator
NCT00492778	Nonyem A. Onujiogu	Principal Investigator
NCT00492778	Nonyem A. Onujiogu	Principal Investigator
NCT00492778	Ovadia Abulafia	Principal Investigator
NCT00492778	Parviz Hanjani	Principal Investigator
NCT00492778	Paul B. Gilman	Principal Investigator
NCT00492778	Peter C. Morris	Principal Investigator
NCT00492778	Philip J. Stella	Principal Investigator
NCT00492778	Philip J. Stella	Principal Investigator
NCT00492778	Philip J. Stella	Principal Investigator
NCT00492778	Philip J. Stella	Principal Investigator
NCT00492778	Philip J. Stella	Principal Investigator
NCT00492778	Philip J. Stella	Principal Investigator
NCT00492778	Philip J. Stella	Principal Investigator
NCT00492778	Philip J. Stella	Principal Investigator
NCT00492778	Philip J. Stella	Principal Investigator
[truncated: 34,970 more rows]

## Sheet: 4_Recruiting_NonPerson
NCT Number	Last name	Role
[truncated: 1,801 more rows]

[truncated: 4 more sheets: 5_Suspended_Person, 5_Suspended_NonPerson, 6_Terminated_Person, 6_Terminated_NonPerson]
