# Supplementary material for: Some data quality issues at ClinicalTrials.gov
Source: Trials. 2019 Jun 24;20:378. doi: 10.1186/s13063-019-3408-2 (PMC6591874; doi:10.1186/s13063-019-3408-2)
Supplement: Supplementary file 17 — Processing of PI names to identify ambiguities—step 1. (XLSX 3330 kb) [file 13063_2019_3408_MOESM17_ESM.xlsx]

## Sheet: cover_note
S15_table.xlsx. Processing of PI names to identify ambiguities – Step 1
To be noted: ‘last_name’ is the term used in downloaded data for the full name of a person
File name	Processing	Number of rows	Comment
S15 Table.xlsx			See S15 Table_name_issue_1.py for script used to process the data.
	All the cases that were taken forward in the S11 table	60787
	Cases where both NCT ID and last_name were duplicated were removed, leaving 48,314.	48314
	Anything in the last_name that was after a comma was considered a suffix and removed. This generated some duplicates or other multiples, which were removed. Single, representative, last_names were retained, and totalled 31,962. There might be a space before or after the name, which would make it appear like a separate, unique string. These were not rejected at this stage.	31962	Taken forward

## Sheet: 60787
nct_number	last_name	role
NCT00045968	Linda Liau, M.D.	Principal Investigator
NCT00045968	Marnix L. Bosch, MBA, PhD	Study Director
NCT00062868	Helen E Heslop, MD	Principal Investigator
NCT00072982	Robert B Zurier, MD	Principal Investigator
NCT00079417	Debra Friedman, MD	Principal Investigator
NCT00081263	Janet Rader	Principal Investigator
NCT00083083	Mitchell Machtay, MD	Study Chair
NCT00085098	Jeffrey C. Allen, MD	Study Chair
NCT00098787	Jean L. Grem, MD	Study Chair
NCT00098787	Neal J. Meropol, MD	Study Chair
NCT00098839	Elizabeth Raetz, MD	Principal Investigator
NCT00099086	David Marshall, MD	Principal Investigator
NCT00100061	Lynn Stothers, MD	Principal Investigator
NCT00100802	Regina Jakacki, MD	Study Chair
NCT00102908	Jeannie S. Huang, MD, MPH	Principal Investigator
NCT00103285	Kelly Maloney, MD	Principal Investigator
NCT00104923	Ann Mohrbacher, MD	Study Chair
NCT00108745	Larry Copeland	Principal Investigator
NCT00114140	Barbara J. Fisher, MD	Principal Investigator
NCT00114140	David R. Macdonald, MD, FRCPC	Study Chair
NCT00114140	Glenn J. Lesser, MD	Study Chair
NCT00114140	Stephen W. Coons, MD	Study Chair
NCT00114231	Julio Garcia-Aguilar, MD, PhD	Study Chair
NCT00114738	Wyndham H Wilson, M.D.	Principal Investigator
NCT00115778	Selim M Arcasoy, M.D.	Principal Investigator
NCT00116142	Anthony V. D'Amico, MD, PhD	Principal Investigator
NCT00117936	Nabil Dib, MD	Principal Investigator
NCT00118209	Andrew D. Zelenetz, MD, PhD	Study Chair
NCT00118209	Wyndham H. Wilson, MD, PhD	Study Chair
NCT00118274	Craig L. Slingluff, MD	Principal Investigator
NCT00118352	Brenda Sandmaier	Principal Investigator
NCT00121251	Scott Tagawa	Principal Investigator
NCT00122005	Bernard Fox, PhD	Principal Investigator
NCT00126581	Pasi Janne	Principal Investigator
NCT00126672	Sandra Dabora, MD, PhD	Study Chair
NCT00127205	Alexander H Paterson, MD, FRCP	Study Chair
NCT00127205	Carla I. Falkson, MD	Study Chair
NCT00127205	Elizabeth C. Dees, MD	Study Chair
NCT00127205	James N. Ingle, MD	Study Chair
NCT00127205	Julie R. Gralow, MD	Study Chair
NCT00127205	Mark J. Clemons, MD	Study Chair
NCT00127205	Robert B. Livingston, MD	Study Chair
NCT00129740	Jorge Cortes, MD	Principal Investigator
NCT00130117	Christos S Mantzoros, MD, ScD	Principal Investigator
NCT00132301	Bruce Montgomery, MD	Study Chair
NCT00132301	Daniel Lin	Study Chair
NCT00132743	Don Cutlip, MD	Principal Investigator
NCT00132743	Timothy Murphy, MD	Principal Investigator
NCT00134030	Neyssa Marina, MD	Principal Investigator
NCT00134056	David I. Quinn, MD	Study Chair
NCT00134056	Maha Hadi A. Hussain, MD	Study Chair
NCT00134056	Mark Garzotto, MD	Study Chair
NCT00134056	Primo N. Lara, MD	Study Chair
NCT00134082	Richard Ambinder, MD	Study Chair
NCT00135200	Mark Kaminski, MD	Principal Investigator
NCT00142519	Natalia Moryl, MD	Principal Investigator
NCT00147914	Jacquelynne Corey, M.D.	Principal Investigator
NCT00151203	Ruben Niesvizky, MD	Principal Investigator
NCT00154180	Dennis M Black, PhD	Principal Investigator
NCT00154180	Frederick Naftolin, MD, PhD	Study Director
NCT00154180	Howard Hodis, MD	Principal Investigator
NCT00154180	Matthew Budoff, MD	Principal Investigator
NCT00154180	Michael Mendelsohn, MD	Principal Investigator
NCT00154180	S Mitchell Harman, MD, PhD	Study Director
NCT00154180	Sanjay Asthana, MD	Principal Investigator
NCT00174525	Daniel E. Grosz, MD	Principal Investigator
NCT00175123	Bettina Jorgensen, MD	Principal Investigator
NCT00179998	Robert G Castile, MD	Principal Investigator
NCT00182715	Timothy Maughan, MD	Study Chair
NCT00183872	Syma Iqbal, M.D.	Principal Investigator
NCT00184015	David Quinn, MD, PhD	Principal Investigator
NCT00185731	Dean Felsher	Principal Investigator
NCT00186888	Ibrahim Qaddoumi, M.D.	Principal Investigator
NCT00195624	Danielle M Townsley, M.D.	Principal Investigator
NCT00200161	Lisa DeAngelis, M.D	Principal Investigator
NCT00201760	Kari Kendra, MD	Principal Investigator
NCT00203411	Arash Naeim, MD, PhD	Study Chair
NCT00203411	Randy Hecht, MD	Study Chair
NCT00205504	John E Nestler, M.D.	Study Director
NCT00205504	Kai I Cheang, Pharm.D.	Principal Investigator
NCT00214747	Kurt Barnhart, MD	Principal Investigator
NCT00214838	Donald Picker, PhD	Study Director
NCT00216242	Nancy Bouveret, MD	Study Director
NCT00217594	Christopher S Hourigan, M.D.	Principal Investigator
NCT00217737	Al Benson	Principal Investigator
NCT00217763	Pr. Bruno Vellas	Principal Investigator
NCT00225537	Anastacio M Hoyumpa, Prof. M.D.	Principal Investigator
NCT00225537	Charles T Leach, Prof. M.D.	Principal Investigator
NCT00225537	Dubravko Pavlin, PhD	Study Director
NCT00227019	Heather A. Wakelee	Principal Investigator
NCT00227461	A.M. Barrett, MD	Principal Investigator
NCT00227617	Emily K. Bergsland, MD	Principal Investigator
NCT00232505	Lisa A. Carey, MD	Principal Investigator
NCT00233324	Abbot R. Laptook, MD	Principal Investigator
NCT00233324	Abhik Das, PhD	Principal Investigator
NCT00233324	Barbara J. Stoll, MD	Principal Investigator
NCT00233324	Brenda B. Poindexter, MD MS	Principal Investigator
NCT00233324	Edward F. Bell, MD	Principal Investigator
NCT00233324	Ivan D. Frantz III, MD	Principal Investigator
NCT00233324	Kathleen A. Kennedy, MD MPH	Principal Investigator
NCT00233324	Krisa P. Van Meurs, MD	Principal Investigator
NCT00233324	Kristi L. Watterberg, MD	Principal Investigator
NCT00233324	Kurt Schibler, MD	Principal Investigator
NCT00233324	Michele C. Walsh, MD MS	Principal Investigator
NCT00233324	Neil N. Finer, MD	Principal Investigator
NCT00233324	Pablo J. Sanchez, MD	Principal Investigator
NCT00233324	Richard A. Ehrenkranz, MD	Principal Investigator
NCT00233324	Roger G. Faix, MD	Principal Investigator
NCT00233324	Ronald N. Goldberg, MD	Principal Investigator
NCT00233324	Seetha Shankaran, MD	Principal Investigator
NCT00233324	Waldemar A. Carlo, MD	Principal Investigator
NCT00233454	Jason Robert Gotlib	Principal Investigator
NCT00233987	Eileen P. Smith, MD	Study Chair
NCT00233987	Louis S. Constine, MD	Study Chair
NCT00233987	Patrick J. Stiff, MD	Study Chair
NCT00234052	Jyoti D. Patel	Study Chair
NCT00234312	Joshua Boverman, MD	Principal Investigator
NCT00235053	Eli O Meltzer, MD	Principal Investigator
NCT00237068	Benjamin D. Gold, MD.	Principal Investigator
NCT00237523	Julia Kazakhin, M.D.	Study Director
NCT00238238	John P. Leonard, MD	Study Chair
NCT00238433	Richard Maziarz, MD	Study Chair
NCT00239746	John Breitner, MD	Principal Investigator
NCT00242593	Suzanne Craft, PhD	Principal Investigator
NCT00244972	David Hong	Principal Investigator
NCT00247520	Wynne H Weston-Davies, MB FRCS	Study Director
NCT00247624	W. Vaughn McCall, MD, MS	Principal Investigator
NCT00248287	Joyce A. O'Shaughnessy, MD	Principal Investigator
NCT00248495	Grace K. Dy, MD	Principal Investigator
NCT00248521	Ian R. Judson, MA, MD, FRCP	Study Chair
NCT00249691	Bankole Johnson	Principal Investigator
NCT00254410	William G. Wierda, MD, PHD, BS	Principal Investigator
NCT00254423	Jorge Cortes, MD	Principal Investigator
NCT00254592	Rita Mehta, M.D.	Principal Investigator
NCT00255346	Hagop M Kantarjian, MD	Principal Investigator
NCT00255801	David J. Straus, MD	Principal Investigator
NCT00255801	Patricia L. Myskowski, MD	Principal Investigator
NCT00255801	Steven M. Horwitz, MD	Principal Investigator
NCT00256308	Ignatius Ou, MD	Principal Investigator
NCT00258687	F. Stephen Hodi, MD	Principal Investigator
NCT00262067	Leonardo Faoro, MD	Study Director
NCT00263341	Ruth Merkatz, Ph.D.	Study Director
NCT00265278	Reese Jones, M.D.	Principal Investigator
NCT00265759	Matthew J. Ellis, MD, PhD, FRCP	Study Chair
NCT00265798	Hedy Kindler	Principal Investigator
NCT00265850	Alan Venook, MD	Study Chair
NCT00265941	David Rosenthal, MD	Principal Investigator
NCT00265941	Phuc Felix Nguyen-Tan, MD	Study Chair
NCT00266110	Jonathan S. Serody, MD	Principal Investigator
NCT00268385	Patrick Wen	Principal Investigator
NCT00270959	Douglas F. Zatzick, MD	Principal Investigator
NCT00271505	William N. William Jr., MD	Principal Investigator
NCT00274924	Lode J. Swinnen, MD	Study Chair
NCT00274937	Carlos Rodriguez-Galindo, MD	Principal Investigator
NCT00274950	Juliet Hale, MD	Principal Investigator
NCT00275067	Jeffrey Raizer, MD	Principal Investigator
NCT00276705	Bruce Morland, MD	Study Chair
NCT00276783	Jeffrey J. Raizer, MD	Study Chair
NCT00278148	Nathan Pennell, MD	Study Chair
NCT00278343	Holger Hirte	Principal Investigator
NCT00278538	Richard Burt, MD	Principal Investigator
NCT00278629	Richard Burt, MD	Principal Investigator
NCT00282100	Alex Chang, M.D.	Principal Investigator
NCT00287287	Kenneth B Ain, M.D.	Principal Investigator
NCT00287924	Martin W. English, MD	Study Chair
NCT00288015	Mark Agulnik, MD	Principal Investigator
NCT00288080	Howard M. Sandler, MD	Principal Investigator
NCT00288080	Kenneth J. Pienta, MD, FACP	Study Chair
NCT00288080	Leonard G. Gomella, MD	Study Chair
NCT00288080	Seth Rosenthal, MD	Study Chair
NCT00288093	Tanios Bekaii-Saab	Principal Investigator
NCT00288873	Emily M Stein, M.D.	Principal Investigator
NCT00290498	Luis E. Fayad, MD	Principal Investigator
NCT00293501	Deborah L. Ornstein, MD	Study Chair
NCT00294658	Gary Cutter, PhD	Principal Investigator
NCT00294658	Gil Wolfe, MD	Principal Investigator
NCT00295373	Michael G Flynn, PhD	Study Director
NCT00295373	Robert E Hannemann, MD	Principal Investigator
NCT00295841	Bayard L. Powell, MD	Study Chair
NCT00295893	George Somlo, MD	Principal Investigator
NCT00295932	John F. Gerecitano, MD, PhD	Study Chair
NCT00298155	Peter S. Nelson, MD	Principal Investigator
NCT00298155	R. Bruce Montgomery, MD	Principal Investigator
NCT00299962	Daniel H. Sterman, M.D.	Principal Investigator
NCT00300807	John Andrews, PhD	Study Director
NCT00301067	Timothy M. Kuzel, MD	Study Chair
NCT00301093	Martha Wadleigh, MD	Principal Investigator
NCT00301756	Amit Oza	Principal Investigator
NCT00301925	David Cameron, MD	Study Chair
NCT00302003	Frank Keller, MD	Principal Investigator
NCT00304031	Mark R. Gilbert, MD	Principal Investigator
NCT00304031	Minesh P. Mehta, MD	Study Chair
NCT00304031	Roger Stupp, MD	Study Chair
NCT00304070	Carlos Rodriguez-Galindo	Principal Investigator
NCT00307151	Avy Violari, MD	Study Chair
NCT00307151	Paul Palumbo, MD	Study Chair
NCT00309907	Gregory Yanik, MD	Principal Investigator
NCT00309985	Christopher Sweeney, MBBS	Study Chair
NCT00310037	Lawrence D. Kaplan, MD	Study Chair
NCT00310180	Joseph Sparano	Principal Investigator
NCT00311805	Douglas W. Losordo, M.D.	Principal Investigator
NCT00313586	Steven Gore	Principal Investigator
NCT00314366	Emerson Perin, MD, PhD	Principal Investigator
NCT00314925	Rudin Charles, MD, PhD	Study Chair
NCT00315341	Andrew Saxon, M.D.	Principal Investigator
NCT00315341	Walter Ling, M.D.	Principal Investigator
NCT00315627	Rodolfo Alejandro, M.D.	Principal Investigator
NCT00316862	David H. Ilson, MD, PhD	Study Chair
NCT00316888	Joseph A. Sparano, MD	Study Chair
NCT00316888	Madhur K. Garg, MD	Study Chair
NCT00317603	Beth Overmoyer, MD	Principal Investigator
NCT00318383	Matt Hohenboken, MD, PhD	Study Director
NCT00319839	S.-H. Ignatius Ou, MD, PhD	Principal Investigator
NCT00321685	Jerome Landry	Principal Investigator
NCT00321698	Mark Garzotto, MD	Principal Investigator
NCT00322023	Daniel C. Javitt, MD, PhD	Principal Investigator
NCT00322309	Maryam Afshar, MD	Principal Investigator
NCT00323063	Deborah R. Toppmeyer, MD	Principal Investigator
NCT00324805	Heather Wakelee	Principal Investigator
NCT00325182	Ofra Sarid-Segal, MD	Principal Investigator
NCT00325286	Sriram Ramaswamy, M.D.	Principal Investigator
NCT00326872	Dusica Babovic-Vuksanovic	Principal Investigator
NCT00329043	Amado Zurita, MD	Principal Investigator
NCT00329719	Kurt Jaeckle	Principal Investigator
NCT00331162	Alan C Farney, MD, Ph.D.	Principal Investigator
NCT00331630	Virginia G. Kaklamani, MD	Principal Investigator
NCT00331760	Anuja Jhingran, MD	Study Chair
NCT00334672	Vasanta Nanduri, MD	Study Chair
NCT00334737	Adam Rosenberg, MD	Principal Investigator
NCT00334737	Robert D Christensen, MD	Principal Investigator
NCT00334737	Robin K Ohls, MD	Principal Investigator
NCT00334737	Susan Wiedmeier, MD	Principal Investigator
NCT00334789	Thehang Luu	Principal Investigator
NCT00335816	Julio Garcia-Aguilar, MD, PhD	Study Chair
NCT00335868	Ronald Paquette, MD	Study Chair
NCT00336024	Claire Mazewski, MD	Principal Investigator
NCT00336063	Wen-Son Hsieh	Principal Investigator
NCT00336947	Mamoru Tsukuda, MD	Study Chair
NCT00337207	Jeffrey J. Raizer, MD	Principal Investigator
NCT00346164	Sheri Spunt, MD	Principal Investigator
NCT00347828	Michael B Raizman, B.A./M.D.	Principal Investigator
NCT00347828	Rahul Mandiga, B.S.	Study Director
NCT00347828	Sandra Y Cho, B.A./M.D.	Study Director
NCT00348816	Gregory P. Swanson, MD	Study Chair
NCT00348946	Judith L. Ross, M.D.	Principal Investigator
NCT00350701	Paresh Dandona, MD	Principal Investigator
NCT00351299	Gerald L Weinhouse, MD	Principal Investigator
NCT00352027	Monika Metzger, M.D.	Principal Investigator
NCT00352794	Srdan Verstovsek, MD	Principal Investigator
NCT00354744	Brenda Weigel, MD	Study Chair
NCT00354744	Carola A Arndt, MD	Study Chair
NCT00354835	Douglas Hawkins, MD	Principal Investigator
NCT00357448	Lupe Salazar	Principal Investigator
NCT00357877	Athena Papas, PhD DMD	Principal Investigator
NCT00358163	Pankaj Bhargava, MD	Principal Investigator
NCT00361244	Andrew X. Zhu, MD	Principal Investigator
NCT00361296	B. Douglas Smith, MD	Principal Investigator
NCT00364390	Bartley P Griffith, MD	Principal Investigator
NCT00364390	George Tellides, M.D., Ph.D.	Principal Investigator
NCT00364598	Kenneth B Margulies, M.D.	Principal Investigator
NCT00364598	Y. Joseph Woo, M.D.	Principal Investigator
NCT00365105	Michael J. Seider, MD, PhD, FACR	Study Chair
NCT00365157	David Quinn	Principal Investigator
NCT00369317	Jeffrey Taub, MD	Principal Investigator
NCT00369707	Andrew M. Evens, DO, MS	Principal Investigator
NCT00371033	John Kusek, PhD	Study Director
NCT00371033	Lee Nyberg, PhD, MD	Study Director
NCT00372515	Bruce Johnson, MD	Principal Investigator
NCT00372593	Alan S. Gamis, MD, MPH	Study Chair
NCT00372593	Richard Aplenc, MD, MSCE	Study Chair
NCT00372619	Bassem I. Razzouk, MD	Study Chair
NCT00372619	Todd Cooper, DO	Study Chair
NCT00372905	Jane Winter, MD	Principal Investigator
NCT00376688	Gini Fleming	Principal Investigator
NCT00376961	Richard I. Fisher, MD	Study Chair
NCT00376961	Steven H. Bernstein, MD	Study Chair
NCT00378105	Paul Richardson, MD	Principal Investigator
NCT00378209	Paul Richardson, MD	Principal Investigator
NCT00378703	Keith Flaherty	Principal Investigator
NCT00379340	David Dix, MD	Principal Investigator
NCT00380029	Raj S. Pruthi, MD	Principal Investigator
NCT00380679	Daniel Fishbein, MD	Principal Investigator
NCT00380679	William M Cassidy, MD	Principal Investigator
NCT00381108	Leland Ronningen, MD	Principal Investigator
NCT00381641	Jonas De Souza	Principal Investigator
NCT00381680	Glen Lew, MD	Principal Investigator
NCT00381797	Sridharan Gururangan	Principal Investigator
NCT00382018	Daniel F. Hayes, MD	Study Chair
NCT00382018	Eric P. Winer, MD	Study Chair
NCT00382018	Jeffrey B. Smerage, MD, PhD	Study Chair
NCT00382070	Norman Wolmark, MD	Principal Investigator
NCT00382109	Michael Pulsipher, MD	Principal Investigator
NCT00382200	Virginia Klimek, MD	Study Chair
NCT00383851	Gilad Gordon, MD	Study Director
NCT00383994	Issa F. Khouri, MD	Principal Investigator
NCT00384176	Jane Robertson	Study Director
NCT00385502	Michael H. Silverman, MD	Study Director
NCT00387075	Danna Jennings, MD	Principal Investigator
NCT00387530	William L. Read, MD	Study Chair
NCT00389038	Scott W. Powers, PhD, ABPP, FAHS	Principal Investigator
NCT00389610	Daniel A. Laheru, MD	Principal Investigator
NCT00390000	Julian Molina	Principal Investigator
NCT00390325	Manisha Shah	Principal Investigator
NCT00390455	Harold Burstein	Principal Investigator
NCT00390767	Sam L Teichman, MD	Study Director
NCT00390793	Farhad Ravandi-Kashani, MD	Principal Investigator
NCT00392015	Cindy Tamminga, MD, MPH	Principal Investigator
NCT00392054	Carlos A Morillo, MD	Principal Investigator
NCT00392054	Natale Andrea, MD	Principal Investigator
NCT00392340	Guy Makin, MD, PhD	Study Chair
NCT00392353	Lewis Silverman	Principal Investigator
NCT00392951	David T. Teachey, MD	Principal Investigator
NCT00392990	Leo Gordon, MD	Principal Investigator
NCT00393783	Teresa Gilewski, MD	Principal Investigator
NCT00394433	Peter Enzinger, MD	Principal Investigator
NCT00395538	Rachel I Gafni, M.D.	Principal Investigator
NCT00396019	Jean Tersak, M.D.	Principal Investigator
NCT00397579	Arthur E. Frankel, MD	Principal Investigator
NCT00397917	Jeffrey Murray, MD	Principal Investigator
NCT00398450	Gregory A. Daniels, MD, PhD	Principal Investigator
NCT00400374	Dong Shin, MD	Principal Investigator
NCT00400816	David M. Peereboom, MD	Study Chair
NCT00400946	Lewis B. Silverman, MD	Principal Investigator
NCT00401817	John P Leonard, MD	Principal Investigator
NCT00402779	Vassiliki Papadimitrakopoulou, M.D.	Principal Investigator
NCT00404417	Kevin R Cannard, MD	Principal Investigator
NCT00405327	James D Geiger, M.D.	Principal Investigator
NCT00405574	Gilad Gordon, MD	Study Director
NCT00405587	Henry Hsu, MD	Study Director
NCT00406809	Mack Mabry, MD	Study Director
NCT00407381	Diana Do, MD	Principal Investigator
NCT00407550	Julian Molina, MD, PhD	Principal Investigator
NCT00408005	Stuart Winter	Principal Investigator
NCT00408408	Norman Wolmark, MD	Principal Investigator
NCT00408499	David R. Gandara, MD	Study Chair
NCT00409383	Anna C Pavlick, MD	Principal Investigator
NCT00410462	Hans Gelderblom, MD, PhD	Study Chair
NCT00410553	Rakesh Goel	Principal Investigator
NCT00410605	Natalie Callander	Principal Investigator
NCT00410813	Anne F. Schott, MD	Study Chair
NCT00410813	Catherine Van Poznak, MD	Study Chair
NCT00410956	William R. Jarnagin, MD	Principal Investigator
NCT00411086	Nathan Fowler, MD	Principal Investigator
NCT00411632	William N. William Jr., MD	Principal Investigator
NCT00411723	Christopher Bever, Jr., M.D., M.B.A.	Principal Investigator
NCT00411723	David Mattson, M.D., Ph.D.	Principal Investigator
NCT00411723	Jana Preiningerova, M.D.	Principal Investigator
NCT00411723	Sharon Lynch, M.D.	Principal Investigator
NCT00411723	Theodore R Brown, M.D.	Principal Investigator
NCT00411723	Vijayshree Yadav, M.D.	Principal Investigator
NCT00414076	Robert Coleman, MD	Principal Investigator
NCT00414648	Bruce Trapnell, MD	Principal Investigator
NCT00414648	Frank McCormack, MD	Principal Investigator
NCT00416351	Steven M. Horwitz, MD	Principal Investigator
NCT00416455	Mostafa Atri	Principal Investigator
NCT00416598	William Blum	Principal Investigator
NCT00417560	Carolyn Bridges, MD	Principal Investigator
NCT00417794	Laura J McGuinn, PhD	Principal Investigator
NCT00418496	J. Paul Monk, M.D.	Principal Investigator
NCT00419562	Jay Skyler, M.D.	Study Chair
NCT00419562	Jeff Krischer, Ph.D.	Principal Investigator
NCT00422591	Farhad Ravandi-Kashani, MD	Principal Investigator
NCT00422799	Irene Ghobrial, MD	Principal Investigator
NCT00423293	Lisa A. Kachnic, MD	Study Chair
NCT00423397	William L. Read, MD	Study Chair
NCT00423514	Farid Boulad, MD	Principal Investigator
NCT00423735	Andrew Lassman	Principal Investigator
NCT00423917	Winston Tan, MD, FACP	Study Chair
NCT00424164	Pierre Fumoleau, MD, PhD	Study Chair
NCT00424242	Jeffrey J. Raizer, MD	Principal Investigator
NCT00424515	F. Stephen Hodi, MD	Principal Investigator
NCT00425477	B. Douglas Smith, MD	Study Chair
NCT00425607	Mark W Kieran, MD, PhD	Study Chair
NCT00425672	Lupe Salazar	Principal Investigator
NCT00425802	Craig Moskowitz, MD	Principal Investigator
NCT00425802	Hugo R. Castro-Malaspina, MD	Principal Investigator
NCT00425802	Juliet Barker, MBBS	Principal Investigator
NCT00426764	Kenichi Takeshita, MD	Study Director
NCT00428298	Jennifer L Payne, MD	Principal Investigator
NCT00428922	Bhuvaneswari Ramaswamy, MD	Principal Investigator
NCT00430040	Paresh Dandona, MD, PhD	Principal Investigator
NCT00430183	James Eastham, MD	Study Chair
NCT00433511	Kathy Miller	Principal Investigator
NCT00433550	Robert McWilliams, MD	Study Chair
NCT00436267	Kenneth L. Pennington, MD	Study Chair
NCT00436332	Howard L. West, MD	Study Chair
NCT00436852	Elizabeth Fox, MD	Principal Investigator
NCT00438256	Theodore Hong, MD	Principal Investigator
NCT00438802	Thomas E. Witzig, MD	Study Chair
NCT00438841	William I. Bensinger, MD	Principal Investigator
NCT00439465	Kenneth Meehan, MD	Principal Investigator
NCT00439556	Issa F. Khouri, MD	Principal Investigator
NCT00439972	Robert H Knopp, MD	Principal Investigator
NCT00441142	Patrick Y Wen, MD	Principal Investigator
NCT00442130	Catherine J. Wu, MD	Principal Investigator
NCT00442533	Ebrahim Delpassand, M.D.	Principal Investigator
NCT00445692	Leona Holmberg	Principal Investigator
NCT00445887	Gus Rodriguez, MD	Study Chair
NCT00448357	Thomas C. Shea, MD	Principal Investigator
NCT00448734	Robert Earhart, MD	Study Director
NCT00449007	Maria A. Oquendo, MD	Principal Investigator
NCT00449657	Paul Walker, MD	Principal Investigator
NCT00450398	Stefan Hemmerich, PhD	Study Director
NCT00450450	Stephan A. Grupp, MD PhD	Principal Investigator
NCT00450463	Ravi A Madan, M.D.	Principal Investigator
NCT00452023	Srdan Verstovsek, MD	Principal Investigator
NCT00453154	Neal Ready	Principal Investigator
NCT00453388	Hans-Peter Kiem	Principal Investigator
NCT00454168	Craig S. Rosenfeld, MD	Study Chair
NCT00454389	Jeffrey A Nau, MMS	Study Director
NCT00454389	Pravin Dugel, MD	Principal Investigator
NCT00455312	Jakub Tolar, M.D., Ph.D.	Principal Investigator
NCT00455325	Clay F. Semenkovich, MD	Principal Investigator
NCT00455689	Hadine Joffe, M.D., M.Sc.	Principal Investigator
NCT00457639	Abhimanyu Garg, M.D.	Principal Investigator
NCT00457769	Anna M Barrett, MD	Principal Investigator
NCT00458653	David Avigan, MD	Principal Investigator
NCT00460031	Jorge Garcia, MD	Principal Investigator
NCT00460031	Matthew M. Cooney, MD	Principal Investigator
NCT00460174	William Small, MD	Study Chair
NCT00460239	Eric C Strain, M.D.	Principal Investigator
NCT00461045	Steven D Reich, MD	Study Director
NCT00464620	Scott Schuetze, MD, PhD	Principal Investigator
NCT00464711	Dan Iosifescu, MD	Principal Investigator
NCT00465491	Dr. Hazel Breitz, M.D.	Study Director
NCT00466661	Bryan K Tolliver, M.D., Ph.D.	Principal Investigator
NCT00466661	Kathleen T Brady, M.D., Ph.D.	Study Director
NCT00466895	Leslie Andritsos, MD	Principal Investigator
NCT00466921	Timothy M. Kuzel, MD	Study Chair
NCT00467051	Carlos Rodriguez-Galindo, MD	Principal Investigator
NCT00468117	James F. Markmann, MD, PhD	Principal Investigator
NCT00468169	Everett E Vokes, MD	Principal Investigator
NCT00468715	Tiffany A. Traina, MD	Principal Investigator
NCT00468910	Hemant Roy	Principal Investigator
NCT00469859	Donald Small, MD, PhD	Study Chair
NCT00469859	Patrick A. Brown, MD	Study Chair
NCT00470015	Svetomir Markovic, MD, PhD	Study Chair
NCT00470496	Hassan Arshad	Principal Investigator
NCT00470704	Nancy Lin, MD	Principal Investigator
NCT00474747	Paolo Anderlini, MD	Principal Investigator
NCT00474929	Shaji K. Kumar, MD	Principal Investigator
NCT00474929	Thomas E. Witzig, MD	Principal Investigator
NCT00475020	Uday Popat, MD	Principal Investigator
NCT00476190	Daniel DeAngelo, MD	Principal Investigator
NCT00477412	Michael Wang, MD, MS	Principal Investigator
NCT00477750	Craig B. Reeder, MD	Principal Investigator
NCT00477750	Philip R. Greipp, MD	Principal Investigator
NCT00477750	Vivek Roy, MD, FACP	Study Chair
NCT00477815	Angela Dispenzieri, MD	Study Chair
NCT00478426	Amit Oza	Principal Investigator
NCT00478465	Jose G Montoya, MD	Principal Investigator
NCT00478946	Robert Earhart, MD, PhD	Study Director
NCT00479128	Arlene Siefker-Radtke, MD	Principal Investigator
NCT00481091	Mack Mabry, MD	Study Director
NCT00481832	Wen-Kai Weng	Principal Investigator
NCT00482092	Priya Raina	Study Director
NCT00482378	Angela Dispenzieri, M.D.	Study Chair
NCT00482950	Hans-Peter Guler, MD	Study Director
NCT00483223	Steven Isakoff, MD, PhD	Principal Investigator
NCT00483366	Elizabeth C. Reed, MD	Study Chair
NCT00483366	Ralph Hauke, MD	Principal Investigator
NCT00485264	Andrew Wiznia, MD	Study Chair
NCT00485264	Sharon A. Nachman, MD	Study Chair
NCT00486603	Myrna Rosenfeld, MD, PhD	Study Chair
NCT00486642	Kim Chi	Principal Investigator
NCT00486668	Norman Wolmark, MD	Principal Investigator
NCT00487305	Eric Jacobsen, MD	Principal Investigator
NCT00489307	Sriram Yennurajalingam, MD	Principal Investigator
NCT00490061	Quynh-Thu Le	Principal Investigator
NCT00490529	Ronald Levy	Principal Investigator
NCT00491816	Priyanka Sharma, M.D.	Principal Investigator
NCT00492050	Sheeba Thomas, MD	Principal Investigator
NCT00492167	Brian H. Kushner, MD	Principal Investigator
NCT00492167	Shakeel Modak, MD	Study Chair
NCT00492349	L. Elliot Hong, M.D.	Principal Investigator
NCT00492999	Michael D'Angelica, MD	Principal Investigator
NCT00492999	Nancy E. Kemeny, MD	Principal Investigator
NCT00493064	Michael Gaynon, MD	Principal Investigator
NCT00493870	Joanne L Blum, MD	Principal Investigator
NCT00494182	George Blumenschein, MD	Principal Investigator
NCT00494234	Andrew Tutt, PhD MRCP FRCR	Principal Investigator
NCT00494234	James Carmichael, BSc, MBChB, MD, FRCP	Study Director
NCT00494442	Andrew Tutt, PhD MRCP FRCR	Principal Investigator
NCT00494442	James Carmichael, BSc MBChB MD FRCP	Study Director
NCT00495170	Joe Y. Chang, MD, PhD	Principal Investigator
NCT00495716	Anna Wald, MD, MPH	Principal Investigator
NCT00496366	Deborah Toppmeyer, MD	Principal Investigator
NCT00497952	Joanne Kurtzberg, MD	Principal Investigator
NCT00497952	Suzanne T. Ildstad, M.D.	Study Director
NCT00498316	Elizabeth Shpall, MD	Principal Investigator
NCT00499083	Elizabeth C. Reed, MD	Principal Investigator
NCT00499083	Kenneth H. Cowan, MD, PhD	Principal Investigator
NCT00499135	Glenn Liu	Principal Investigator
NCT00499525	William J. Gradishar, MD	Study Chair
NCT00499603	Ana Gonzalez-Angulo, M.D.	Principal Investigator
NCT00499616	Clare Twist, MD	Study Chair
NCT00499616	Mary Lou Schmidt, MD	Study Chair
NCT00499655	Karen Reckamp	Principal Investigator
NCT00500045	Michael Gaynon, MD	Principal Investigator
NCT00500344	Rajendra S. Apte, MD, PhD	Principal Investigator
NCT00500890	Michael E. Rytting, MD	Principal Investigator
NCT00501410	Scott Kopetz, MD	Principal Investigator
NCT00504751	Richard Furman, MD	Principal Investigator
NCT00504894	Kane Pryor, M.D.	Principal Investigator
NCT00505063	Rachel Kobos, MD	Principal Investigator
NCT00507728	Paul Cinciripini, PhD	Principal Investigator
NCT00509093	Anjali Advani, MD	Principal Investigator
NCT00509093	Brenda Cooper, MD	Principal Investigator
NCT00509899	Ayalew Tefferi, MD	Principal Investigator
NCT00509899	Srdan Verstovsek, MD, PhD	Principal Investigator
NCT00511992	D. Scott McMeekin, MD	Principal Investigator
NCT00513240	Dean B. Andropoulos, M.D.	Principal Investigator
NCT00513292	Aman Buzdar	Principal Investigator
NCT00513383	Lori J. Wirth, MD	Principal Investigator
NCT00513461	John Hoefs	Principal Investigator
NCT00513578	Craig S. Rosenfeld, MD	Study Chair
NCT00513695	Jennifer Specht	Principal Investigator
NCT00513747	John C. Byrd, MD	Study Chair
NCT00513786	David O'Malley, MD	Principal Investigator
NCT00514046	Brigitte C Widemann, M.D.	Principal Investigator
NCT00514072	James L. Gulley, MD, PhD, FACP	Principal Investigator
NCT00514449	Konasale Prasad, MD	Principal Investigator
NCT00514774	Penelope Hogarth, M.D.	Principal Investigator
NCT00515021	James A Muldowney, III, MD	Principal Investigator
NCT00515281	Michael D. Schreiber, M.D.	Principal Investigator
NCT00515528	Thomas Gajeweski, MD, PhD	Principal Investigator
NCT00516100	Ronald B. Natale, MD	Principal Investigator
NCT00516373	Dr. Johann De Bono, PhD MRCP FRCR	Principal Investigator
NCT00516373	Jane Robertson, BSc, MBCHB, MD	Study Director
NCT00516477	Albert M Maguire, MD	Principal Investigator
NCT00516607	Roy Rampling, MD, PhD	Study Chair
NCT00518583	John Macdonald, MD	Study Director
NCT00520130	Lauren M Curtis, M.D.	Principal Investigator
NCT00520767	Jeffrey A. Zonder, MD	Principal Investigator
NCT00520910	Brian Berman, M.D., Ph.D.	Principal Investigator
NCT00520975	Ingrid Mayer	Principal Investigator
NCT00524277	Elizabeth A Mittendorf, MD, FACS	Principal Investigator
NCT00524277	George E Peoples, MD, FACS	Study Director
NCT00525577	Walker Long, MD	Study Chair
NCT00526591	Jorge A. Garcia, MD	Principal Investigator
NCT00527566	Michael Wechsler, MD	Principal Investigator
NCT00528580	Jerry Krishnan, MD	Principal Investigator
NCT00528866	Mark Hurwitz, MD	Principal Investigator
NCT00528866	Oliver Sartor, MD	Study Chair
NCT00528866	Ying Xiao, PhD	Study Chair
NCT00528957	Erin Quirk, MD	Study Director
NCT00528983	Barry Skikne, M.D., FACP; FCP (SA)	Study Director
NCT00529035	John Koreth, MBBS, D.Phil	Principal Investigator
NCT00530868	Andres Forero, M.D.	Principal Investigator
NCT00531284	Naseem Zojwalla	Study Director
NCT00533949	Alex A. Adjei, MD, PhD	Study Chair
NCT00533949	Arthur William Blackstock, MD	Study Chair
NCT00533949	Gregory A. Masters, MD	Study Chair
NCT00533949	Hak Choy, MD	Study Chair
NCT00533949	Jeffrey A. Bogart, MD	Study Chair
NCT00533949	Jeffrey Bradley, MD	Principal Investigator
NCT00533949	Mark A. Socinski, MD	Study Chair
NCT00533949	Steven E. Schild, MD	Study Chair
NCT00536341	Ian W. Flinn, M.D.	Study Chair
NCT00536874	Eileen O'Reilly, MD	Principal Investigator
NCT00536874	Peter J. Allen, MD	Principal Investigator
NCT00536952	Bharat B. Mittal, MD	Study Chair
NCT00536991	Saby George	Principal Investigator
NCT00538720	Nancy D. Perrier, MD	Principal Investigator
NCT00538824	Ruben Niesvizky, MD	Principal Investigator
NCT00539591	Alberto Pappo, MD	Principal Investigator
NCT00540007	Todd Fehniger, M.D., Ph.D.	Principal Investigator
NCT00540930	Carol L Shields, MD	Principal Investigator
NCT00540995	Anthony Stein	Principal Investigator
NCT00542451	Eric Winer, MD	Principal Investigator
NCT00543504	Funda Meric-Bernstam, MD	Principal Investigator
NCT00544830	Przemyslaw W. Twardowski, MD	Principal Investigator
NCT00547066	William Wegener, MD, PHD	Study Chair
NCT00547378	Steven Siegel, MD	Study Chair
NCT00550537	David Carbone, M.D., Ph.D.	Study Chair
NCT00550615	Julie Vose, M.D.	Principal Investigator
NCT00551070	John Farley	Principal Investigator
NCT00551460	Cheryl L. Willman, MD	Study Chair
NCT00551460	Jeffrey E. Lancet, MD	Study Chair
NCT00551460	Marilyn L. Slovak, PhD	Study Chair
NCT00551460	Rami Komrokji, MD	Study Chair
NCT00553098	Lauri Burroughs	Principal Investigator
NCT00553150	Jann N. Sarkaria, MD	Study Chair
NCT00553202	Stella M. Davies, MBBS, PhD	Study Chair
NCT00553410	Marco Colleoni, MD	Study Chair
NCT00553462	Rogerio Lilenbaum, MD	Study Chair
NCT00553644	Vicki Morrison	Principal Investigator
NCT00553683	Andrew N. de la Torre, MD	Study Chair
NCT00553800	Hossein Borghaei, DO	Principal Investigator
NCT00554515	Allen Pantuck, MD	Principal Investigator
NCT00554515	David F McDermott, MD	Study Chair
NCT00554515	Geoffrey Weiss, MD	Principal Investigator
NCT00554515	Janice Dutcher, MD	Principal Investigator
NCT00554515	Jeffrey Sosman, MD	Principal Investigator
NCT00554515	Joseph Clark, MD	Principal Investigator
NCT00554515	Kim Margolin, MD	Principal Investigator
NCT00554515	Leonard Appleman, MD	Principal Investigator
NCT00554515	Leslie Oleksowicz, MD	Principal Investigator
NCT00554515	Marc Ernstoff, MD	Principal Investigator
NCT00554515	Michael Wong, MD	Principal Investigator
NCT00554515	Theodore Logan, MD	Principal Investigator
NCT00554515	Ulka Vaishampayan, MD	Principal Investigator
NCT00554515	Walter Urba, MD	Principal Investigator
NCT00554788	Ira Dunkel, MD	Principal Investigator
NCT00555399	Marta Penas-Prado, MD	Principal Investigator
NCT00555399	Vinay Puduvalli, MD	Study Chair
NCT00555581	Robert Spiera, MD	Principal Investigator
NCT00557193	Joanne Hilden, MD	Principal Investigator
NCT00557349	Roger de la Torre, MD	Principal Investigator
NCT00557492	Herbert J. Zeh, MD	Principal Investigator
NCT00558519	Wendy Stock, M.D.	Study Chair
NCT00558896	Martha Q. Lacy, MD	Study Chair
NCT00559117	Andrew Brenner, MD	Principal Investigator
NCT00559117	Pierre Triozzi, Dr.	Principal Investigator
NCT00559819	Asokumar Buvanendran, MD	Study Director
NCT00560586	Leila Kheirandish, MD	Principal Investigator
NCT00562328	Clive S. Zent, MD	Study Chair
NCT00562640	Richard J. O'Reilly, MD	Principal Investigator
NCT00562640	Roisin O'Cearbhaill, MB, BCh	Principal Investigator
NCT00563212	Rany Condos, MD	Principal Investigator
NCT00563784	Ritsuko R. Komaki, MD	Principal Investigator
NCT00565487	Yixing Jiang, M.D.	Principal Investigator
NCT00565773	Antonio Guasch, MD	Principal Investigator
NCT00566488	M. Louise Markert, MD, PhD	Principal Investigator
NCT00566540	Enver Ozer, MD	Principal Investigator
NCT00566618	Stacy Moulder, MD	Principal Investigator
NCT00566696	Brandon Triplett, MD	Principal Investigator
NCT00566852	Christina A. Meyers, PhD	Study Chair
NCT00566852	Deepak Khuntia, MD	Study Chair
NCT00566852	Paul D. Brown, MD	Principal Investigator
NCT00566852	Sherry Fox, RN, PhD	Study Chair
NCT00567190	Ru Walker, M.D.	Study Director
NCT00567359	Lecia V. Sequist, MD, MPH	Principal Investigator
NCT00567567	Julie Park, MD	Principal Investigator
NCT00567580	Alan Pollack, MD, PhD	Principal Investigator
NCT00567580	Joycelyn L. Speight, MD, PhD	Study Chair
NCT00567580	Leonard G. Gomella, MD	Study Chair
NCT00569127	James Yao	Principal Investigator
NCT00570258	Issam Makhoul, MD	Principal Investigator
NCT00570674	Roy B. Tishler, MD	Principal Investigator
NCT00571298	David J Sugarbaker, MD	Principal Investigator
NCT00572065	Gail Roboz, MD	Principal Investigator
NCT00572078	Daniela E Matei, MD	Principal Investigator
NCT00572078	Elena G Chiorean, MD	Principal Investigator
NCT00572169	Gareth Morgan, MD, PhD	Principal Investigator
NCT00572897	Damiano Rondelli, MD	Study Chair
NCT00572897	Giovanni Barosi, MD	Study Chair
NCT00572897	John Mascarenhas, MD	Principal Investigator
NCT00573794	Andreas Lazar, MD	Study Director
NCT00574119	Marvin W Kronenberg, MD	Principal Investigator
NCT00574496	Craig Moskowitz, MD	Principal Investigator
NCT00574496	Farid Boulad, MD	Principal Investigator
NCT00574496	Juliet Barker, MBBS	Principal Investigator
NCT00574496	Miguel-Angel Perales, MD	Principal Investigator
NCT00574496	Tanya Trippett, MD	Principal Investigator
NCT00574587	Joseph Sparano, MD	Principal Investigator
NCT00574769	Mitchell E Gross, MD, Ph.D	Principal Investigator
NCT00575393	Julian Molina, MD, PhD	Principal Investigator
NCT00575952	D. McMeekin	Principal Investigator
NCT00576225	Jack W. Singer, M.D.	Study Director
NCT00576680	Jennifer Chan, MD, PhD	Principal Investigator
NCT00576836	M. Louise Markert, MD, PhD	Principal Investigator
NCT00576979	Anthony S. Stein, MD	Study Chair
NCT00577005	Gerardo Gonzalez, MD	Principal Investigator
NCT00577200	Asokumar Buvanendran, M.D.	Principal Investigator
NCT00577278	Auayporn P. Nademanee, MD	Study Chair
NCT00577304	Jan Ohrstrom, PhD	Study Director
NCT00577382	F. Stephen Hodi, MD	Principal Investigator
NCT00577577	Richard Moxley, M.D.	Study Chair
NCT00577629	David Rizzieri, MD	Principal Investigator
NCT00579280	David Sheehan, MD	Principal Investigator
NCT00579527	M. Louise Markert, MD, PhD	Principal Investigator
NCT00580333	Paula D. Ryan, MD	Principal Investigator
NCT00580645	Sherry A McKee, PhD	Principal Investigator
NCT00580853	Sherry A McKee, PhD	Principal Investigator
NCT00580931	Steven S Schreiber, MD	Principal Investigator
NCT00583024	David M Lubaroff, PhD	Principal Investigator
NCT00583453	Douglas VanDaele, MD	Principal Investigator
NCT00583752	David M Lubaroff, PhD	Principal Investigator
NCT00586391	Carlos Ramos, MD	Principal Investigator
NCT00588770	Athanassios (Ethan) Argiris	Principal Investigator
NCT00588991	Keith Pratz	Principal Investigator
NCT00589056	Amit Maity	Principal Investigator
NCT00589121	Burton L. Eisenberg, MD	Study Chair
NCT00589121	David G. Kirsch, MD, PhD	Study Chair
NCT00589121	Dian Wang, MD, PhD	Principal Investigator
NCT00589121	John M. Kane, MD	Study Chair
NCT00589121	Scott Okuno, MD	Study Chair
NCT00589186	Toh Han Chong, MD, MBBS, MRCP	Study Chair
NCT00589875	E. Antonio Chiocca, MD, PhD	Principal Investigator
NCT00590824	Mark R Albertini, MD	Study Chair
NCT00590824	Paul M Sondel, MD, PhD	Principal Investigator
NCT00590954	Thomas Kaley, MD	Principal Investigator
NCT00591058	Burt Nabors, MD	Principal Investigator
NCT00591058	Gerry Linette, MD	Principal Investigator
NCT00591058	Glenn Lesser, MD	Principal Investigator
NCT00591058	Jeremy Rudnick, MD	Principal Investigator
NCT00591058	Maceij Mrugala, MD	Principal Investigator
NCT00591058	Sean Grimm, MD	Principal Investigator
NCT00591058	Steven Rosenfeld, MD, PhD	Principal Investigator
NCT00591292	Jonathan Lewis, MD	Study Director
NCT00591383	Jonathan Lewis, MD	Study Director
NCT00591422	Jonathan Lewis, MD, PhD	Study Director
NCT00591630	Issa F. Khouri, MD	Principal Investigator
NCT00592150	Robert M Carey, MD	Principal Investigator
NCT00592501	Annie W Chan, MD	Principal Investigator
NCT00593242	Charles M Cotten, MD MHS	Principal Investigator
NCT00593450	Daniel F Martin, MD	Study Chair
NCT00593450	Glenn Jaffe,, MD	Study Director
NCT00593450	Juan E Grunwald, MD	Principal Investigator
NCT00593450	Maureen G Maguire, PhD	Study Director
NCT00593450	Stuart L Fine, MD	Study Chair
NCT00593554	Sherif Farag, MD/PhD	Principal Investigator
NCT00595088	Donald Lamm, MD	Principal Investigator
NCT00596011	Nagi Kumar, PhD	Principal Investigator
NCT00596531	William H Martin, Ph.D.	Principal Investigator
NCT00596531	Yongbing Shi, M.D., Ph.D.	Principal Investigator
NCT00596622	Amit Anand, MD	Principal Investigator
NCT00599170	Anil Tulpule, MD	Principal Investigator
NCT00600496	Jeffrey Infante, MD	Principal Investigator
NCT00600496	Kevin Kim, MD	Principal Investigator
NCT00600496	Patricia LoRusso, DO	Principal Investigator
NCT00600496	Roger Cohen, MD	Principal Investigator
NCT00601094	Jay M. Lee, MD	Study Chair
NCT00601705	David J. Adelstein, MD	Principal Investigator
NCT00601900	Maura Dickler	Principal Investigator
NCT00601913	J. D. Browne, MD	Principal Investigator
NCT00601913	Mercedes Porosnicu, MD	Principal Investigator
NCT00602186	SAKINEH hajebrahimi, MD	Study Director
NCT00602459	John Byrd	Principal Investigator
NCT00602641	Alexander Stewart	Principal Investigator
NCT00602693	Claudio G. Brunstein, MD, PhD	Principal Investigator
NCT00602693	Margaret L. MacMillan, MD	Principal Investigator
NCT00602836	Han Win Tun, MD	Principal Investigator
NCT00602836	Jose F. Leis, MD, PhD	Principal Investigator
NCT00602836	Tait D. Shanafelt, MD	Study Chair
NCT00604591	Edward Huey, MD	Principal Investigator
NCT00605696	Michelle Ng Gong, MD, MS	Principal Investigator
NCT00608075	Caleb M Adler, MD	Principal Investigator
NCT00608205	David J. Adelstein, MD	Principal Investigator
NCT00608205	Panayiotis Savvides, MD	Principal Investigator
NCT00609336	Andrew Coveler	Principal Investigator
NCT00609791	Arti Hurria, MD	Principal Investigator
NCT00610493	Sarina Piha-Paul, MD	Principal Investigator
NCT00611208	Arthur E Frankel, MD	Principal Investigator
NCT00611208	Cesar Rodriguez, MD	Principal Investigator
NCT00611208	Madeleine Duvic, MD	Principal Investigator
NCT00611572	Handan Gunduz-Bruce, M.D.	Principal Investigator
NCT00612274	Stuart Seropian, M.D.	Principal Investigator
NCT00613080	Adam C. Berger, MD	Study Chair
NCT00613080	Johanna Bendell, MD	Study Chair
NCT00613080	Michael C. Garofalo, MD	Principal Investigator
NCT00614809	Wu yilong, MD	Principal Investigator
NCT00614822	Michael Guarino, MD	Principal Investigator
NCT00615784	Donald E. Tsai, MD, PhD	Principal Investigator
NCT00617409	Scott Antonia, M.D.	Principal Investigator
NCT00617942	William Sikov, MD	Principal Investigator
NCT00617981	Riccardo Lencioni, M.D.	Study Director
NCT00617981	Ronnie T Poon, M.D.	Study Director
NCT00618605	Dan Barouch, MD, PhD	Study Chair
NCT00618605	Lindsey Baden, MD	Study Chair
NCT00618605	Raphael Dolin, MD	Study Chair
NCT00620633	Susan Prockop, MD	Principal Investigator
NCT00621309	David L Eaton, PhD	Principal Investigator
NCT00621686	Evanthia Galanis, MD	Study Chair
NCT00622466	Barbara B. Haley, MD	Principal Investigator
NCT00622726	Helen A. Mintz-Hittner, M.D.	Principal Investigator
NCT00624013	Mayer Davidson, M.D.	Study Director
NCT00624715	Deepak D'Souza, M.D.	Principal Investigator
NCT00624923	Allison B. Goldfine, MD	Principal Investigator
NCT00624923	Ernest Schaefer, MD	Principal Investigator
NCT00624923	Francine Welty, MD	Study Director
NCT00624923	Melvin Clouse, MD	Principal Investigator
NCT00624923	Steven E. Shoelson, MD, PhD	Principal Investigator
NCT00625820	Rajiv Saran, MD	Principal Investigator
NCT00625846	Keith Bible	Principal Investigator
NCT00626483	Gordana Vlahovic, MD	Principal Investigator
NCT00626990	Anna Nowak, MD	Study Chair
NCT00626990	Michael A. Vogelbaum, MD, PhD	Study Chair
NCT00626990	S. Erridge	Study Chair
NCT00626990	Warren P. Mason, MD	Study Chair
NCT00626990	Wolfgang Wick	Study Chair
NCT00628251	Jane Robertson, BSc, MBCHB, MD	Study Director
NCT00628251	Stan Kaye, BSc, MB, FRCP, FRCR, SMedSCi	Principal Investigator
NCT00628498	Paul Richardson, M.D.	Principal Investigator
NCT00628498	William Tappe, M.D.	Study Chair
NCT00628914	Ian A Cook, MD	Principal Investigator
NCT00629343	Robert N Taub, MD	Principal Investigator
NCT00629798	Hugo Castro-Malaspina, MD	Principal Investigator
NCT00630032	Mario Campone, MD	Principal Investigator
NCT00630097	Gantt Galloway, PharmD	Principal Investigator
NCT00631072	F. Stephen Hodi, MD	Principal Investigator
NCT00631072	Steven Balk, MD, PhD	Principal Investigator
NCT00631852	Elizabeth Peralta, M.D.	Principal Investigator
NCT00633165	Jack Singer, M.D.	Study Chair
NCT00633594	Ian W Flinn, M.D.	Study Chair
NCT00634231	Mark W Kieran, MD, PhD	Study Chair
NCT00634270	Brian Weiss, MD	Principal Investigator
NCT00634270	Bruce Korf, MD	Principal Investigator
NCT00634270	Roger Packer, MD	Study Director
NCT00634634	Antoinette Tan, MD	Principal Investigator
NCT00635557	Andrew P. Beelen, MD	Study Director
NCT00638547	Paul Orchard, MD	Principal Investigator
NCT00639639	Gordana Vlahovic, MD	Principal Investigator
NCT00639717	Gregory Yanik, MD	Principal Investigator
NCT00639743	Guy MEYER, MD PhD	Principal Investigator
NCT00639743	Stavros Konstantinides, MD, PhD	Principal Investigator
NCT00640003	Thomas O Crawford, M.D.	Principal Investigator
NCT00641147	Francis Giardiello	Principal Investigator
NCT00641160	George Tidmarsh, MD, PhD	Study Director
NCT00643097	Gordana Vlahovic, MD	Principal Investigator
NCT00644228	Brian G. Durie	Principal Investigator
NCT00644696	Rajen Mody, MD	Principal Investigator
NCT00645710	Jeffrey Wong	Principal Investigator
NCT00646230	Barry J. Maurer, MD, PhD	Study Chair
NCT00651261	Richard M. Stone, MD	Study Chair
NCT00652574	Anne S. Tsao, MD	Principal Investigator
NCT00653068	Alyssa Reddy, MD	Principal Investigator
NCT00654160	Robert McWilliams, MD	Principal Investigator
NCT00654732	Michelle Fanale, MD	Principal Investigator
NCT00655850	Francisco Robert, M.D.	Principal Investigator
NCT00655876	David H. Ilson, MD, PhD	Study Chair
NCT00655876	Mohan Suntharalingam, MD	Principal Investigator
NCT00656058	Ronald E Gress, M.D.	Principal Investigator
NCT00656786	Cliff Perlis, MD	Principal Investigator
NCT00656786	Jennifer Temel, MD	Principal Investigator
NCT00656786	Madeline Duvic, MD	Principal Investigator
NCT00656786	Maria Colavincenzo, MD	Principal Investigator
NCT00656786	Milan Anadkat, MD	Principal Investigator
NCT00656786	Serena Mraz, MD	Principal Investigator
NCT00656786	Vera Hirsh, MD	Principal Investigator
NCT00658814	Sucha Nand	Principal Investigator
NCT00658892	Svetomir Markovic, M.D., Ph.D.	Principal Investigator
NCT00658931	John L Shuster, MD	Principal Investigator
NCT00659828	Julio Licinio, MD	Principal Investigator
NCT00660101	Henry E Schea	Study Director
NCT00660283	Renato V LaRocca, MD	Principal Investigator
NCT00660673	Janet Benesh	Study Director
NCT00661193	Primo N. Lara, MD	Study Chair
NCT00661492	Mark T. Fleming, MD	Principal Investigator
NCT00662129	Donald W. Northfelt, MD, FACP	Study Chair
NCT00662506	Tracy Batchelor	Principal Investigator
NCT00662636	Charles Erlichman	Principal Investigator
NCT00663039	Henry Holcomb, M.D.	Principal Investigator
NCT00663689	Wu Yilong, MD	Principal Investigator
NCT00666562	Tracy Downs	Principal Investigator
NCT00667342	Michael Bishop, MD	Principal Investigator
NCT00667615	David Straus, MD	Principal Investigator
NCT00668421	Ronald Hoffman, MD	Principal Investigator
NCT00668850	Gerald Bernstein,, MD	Study Chair
NCT00668850	Jaime Davidson, MD	Study Director
NCT00668850	Philip Raskin, MD	Principal Investigator
NCT00668941	Robert Lindsay, MD, PhD	Principal Investigator
NCT00669162	Xinglei Shen, MD	Principal Investigator
NCT00669669	Hans-Peter Kiem	Principal Investigator
NCT00669734	Elizabeth Poplin	Principal Investigator
NCT00670748	Steven A Rosenberg, M.D.	Principal Investigator
NCT00672737	Anthony Doufas	Principal Investigator
NCT00673218	Robert G Townley, MD	Principal Investigator
NCT00674297	Doruk Erkan, MD	Principal Investigator
NCT00674297	Silvia Pierangeli, PhD	Principal Investigator
NCT00674479	Farhad Ravandi-Kashani, M.D.	Principal Investigator
NCT00674648	Susan Prockop, MD	Principal Investigator
NCT00675233	Hassan Arshad, MD	Principal Investigator
NCT00676975	Francis KL Chan, MD	Principal Investigator
NCT00677092	Jonathan Kay, MD	Principal Investigator
NCT00678730	Deepak D'Souza, M.D.	Principal Investigator
NCT00678743	Kevin C. Maki, PhD	Study Director
NCT00679029	Elizabeth Reed	Principal Investigator
NCT00679289	John Kirkwood, MD	Study Chair
NCT00682435	Andrew Chang, M.D.	Principal Investigator
NCT00683670	Gerald P. Linette, M.D., Ph.D.	Principal Investigator
NCT00683761	Adam Mamelak, MD	Principal Investigator
NCT00683761	Antonio Omuro, MD	Principal Investigator
NCT00683761	David Schiff, MD	Principal Investigator
NCT00683761	Edward Pan, MD	Principal Investigator
NCT00683761	Heather Jacene, MD	Principal Investigator
NCT00683761	Jan Drappatz, MD	Principal Investigator
NCT00683761	Jay-Jiguang Zhu, MD	Principal Investigator
NCT00683761	Jeffrey Olson, MD	Principal Investigator
NCT00683761	Jeffrey Raizer, MD	Principal Investigator
NCT00683761	John Fiveash, MD	Principal Investigator
NCT00683761	Karen Fink, MD	Principal Investigator
NCT00683761	Maciej Mrugala, MD	Principal Investigator
NCT00683761	Marc Chamberlain, MD	Principal Investigator
NCT00683761	Mark Malkin, MD	Principal Investigator
NCT00683761	Michael Edgeworth, MD	Principal Investigator
NCT00683761	Nimish Mobile, MD	Principal Investigator
NCT00683761	Patrick Wen, MD	Principal Investigator
NCT00683761	Richard Wahl, MD	Principal Investigator
NCT00683761	Sean Grimm, MD	Principal Investigator
NCT00683761	Steven Chmura, MD	Principal Investigator
NCT00683761	Steven Rosenfeld, MD	Principal Investigator
NCT00683761	Thomas Gribbin, MD	Principal Investigator
NCT00684294	Minal Barve, MD	Principal Investigator
NCT00684983	Tufia Haddad	Principal Investigator
NCT00685919	David Robertson, MD	Principal Investigator
NCT00686166	Cynthia G. Leichman, MD	Study Chair
NCT00686374	Andreas Lazar	Study Director
NCT00686972	Dariush Elahi, PhD	Principal Investigator
NCT00689572	Nassima Ait-Daoud Tiouririne, M.D.	Principal Investigator
NCT00689936	Christian Jacques, MD	Study Director
NCT00691015	Zaid Al-Kadhimi, MD	Study Chair
NCT00691106	Joseph Jorizzo, MD	Principal Investigator
NCT00693654	Alan Fleischer, MD	Principal Investigator
NCT00693693	Steve Feldman, MD, PhD	Principal Investigator
NCT00694915	Amillal Bhat, MD	Principal Investigator
NCT00694915	Anup Kundu, MD	Principal Investigator
NCT00694915	B. R. Srivastav, MD	Principal Investigator
NCT00694915	H. K. Moorthy, MD	Principal Investigator
NCT00694915	Jitendra Amlani, MD	Principal Investigator
NCT00694915	Kim Mammen, MD	Principal Investigator
NCT00694915	Mahesh Desai, MD	Principal Investigator
NCT00694915	N K Mohanty, MD	Principal Investigator
NCT00694915	Padmaraj Hegde, MD	Principal Investigator
NCT00694915	Purshottam K. Puri, MD	Principal Investigator
NCT00694915	Rajeev Sood, MD	Principal Investigator
NCT00694915	Shrawan K. Singh, MD	Principal Investigator
NCT00694915	Sujata Patwardhan, MD	Principal Investigator
NCT00694915	Sushil Bhatia, MD	Principal Investigator
NCT00694915	Yathish Kumar, MD	Principal Investigator
NCT00695409	Amrita Y. Krishnan, MD	Principal Investigator
NCT00695786	Felipe Samaniego, MD	Principal Investigator
NCT00695877	Dan Barouch, MD	Study Chair
NCT00695877	Lindsey Baden, MD	Study Chair
NCT00696449	Steve Feldman, MD, PhD	Principal Investigator
NCT00697463	Adi Cohen, MD	Study Director
NCT00697463	Elizabeth Shane, MD	Principal Investigator
NCT00697684	David E Avigan, MD	Principal Investigator
NCT00698815	Rebecca Heist	Principal Investigator
NCT00699491	Cynthia Ma	Principal Investigator
NCT00699556	Sherry A McKee, PhD	Principal Investigator
NCT00700076	Deepak C D'Souza, M.D.	Principal Investigator
NCT00700596	Mohini Ranganathan, M.D.	Principal Investigator
NCT00701233	Dennis Dykstra, MD	Principal Investigator
NCT00702962	Chandra P Belani, MD	Principal Investigator
NCT00703222	Chrystal U Louis, MD	Principal Investigator
NCT00703625	Joel Picus, M.D.	Principal Investigator
NCT00703664	Beata Holkova	Principal Investigator
NCT00705926	Eric S. Rosenberg, MD	Study Chair
NCT00705926	H.T. Banks, PhD	Principal Investigator
NCT00705926	Marie Davidian, PhD	Principal Investigator
NCT00706147	Merit Cudkowicz, MD, MSc	Principal Investigator
NCT00706147	Michael Benatar, MBChB, DPhil	Principal Investigator
NCT00707876	William Strauss, MD	Study Director
NCT00708773	Federico Innocenti, MD, PhD	Principal Investigator
NCT00708994	Deepak D'Souza, MD	Principal Investigator
NCT00709592	Amir Toor, MD	Principal Investigator
NCT00710697	Robert Earhart, MD, PhD	Study Director
NCT00710892	Malcolm K Brenner, MD	Principal Investigator
NCT00711243	Mary Mulcahy, MD	Principal Investigator
NCT00711412	Mary Mulcahy, MD	Principal Investigator
NCT00711828	Craig Reeder	Principal Investigator
NCT00712582	Craig Moskowitz, MD	Principal Investigator
NCT00713193	Spero R Cataland, MD	Principal Investigator
NCT00714246	Chandra P. Belani, MD	Principal Investigator
NCT00715442	Eric Jonasch, MD	Principal Investigator
NCT00715988	Robert Ward, M.D.	Principal Investigator
NCT00716976	David R. Freyer, DO, MS	Study Chair
NCT00718484	Jonathan J Lewis, MD, PhD	Study Director
NCT00720226	Robert A. Wise, MD	Principal Investigator
NCT00720356	Jeffrey J. Raizer, MD	Principal Investigator
NCT00720876	Robert Chen, MD	Principal Investigator
NCT00721513	Mercedes Porosnicu, MD	Principal Investigator
NCT00721799	John M. Buatti, M.D.	Principal Investigator
NCT00721799	Yusuf Menda, M.D.	Principal Investigator
NCT00722865	Jeremy Abramson, MD	Principal Investigator
NCT00723177	Sandra D Comer, PhD	Principal Investigator
NCT00723229	Christine Johnston, MD, MPH	Principal Investigator
NCT00723255	Edwin Alvarez	Principal Investigator
NCT00724568	Moshe Talpaz, MD	Principal Investigator
NCT00726232	Lance Leopold, MD	Study Director
NCT00726596	Mark Stein, MD	Principal Investigator
NCT00726687	Jonathan Lewis, MD	Study Chair
NCT00727948	Chris E Holmes, MD, PhD	Principal Investigator
NCT00728507	Susan Dorman, MD	Principal Investigator
NCT00728728	Christine Marx, MD MA	Principal Investigator
NCT00729118	Craig C. Hofmeister, MD	Principal Investigator
NCT00729586	Gini Fleming	Principal Investigator
NCT00729612	Gregory A. Otterson, MD	Principal Investigator
NCT00729716	Avner Yayon, PhD MD	Study Director
NCT00729911	Andrea Natale, MD	Principal Investigator
NCT00729911	Luigi Di Biase, MD, PhD	Principal Investigator
NCT00731302	C M Stein, M.D.	Principal Investigator
NCT00731731	Evanthia Galanis	Principal Investigator
NCT00731952	David R Jones, MD	Principal Investigator
NCT00732121	Richard E Pratley, MD	Principal Investigator
NCT00732498	Soham D Puvvada, MD	Principal Investigator
NCT00732654	Robert Wood, MD	Principal Investigator
NCT00733408	Jennifer Specht	Principal Investigator
NCT00733746	Peter W.T. Pisters, MD	Study Chair
NCT00736645	James L. Mohler, MD	Principal Investigator
NCT00736944	Douglas Adkins, M.D.	Principal Investigator
NCT00737529	Lei Zhang, MD	Study Director
NCT00740064	Benjamin Young, MD, PhD	Principal Investigator
NCT00740441	Greg Smith, MD	Principal Investigator
NCT00740441	Harry Drabkin, MD	Principal Investigator
NCT00740805	Mark Stein	Principal Investigator
NCT00741403	Avi Retter, M.D.	Principal Investigator
NCT00741403	Divis K Khaira, M.D.	Principal Investigator
NCT00741403	Karen Gelmon, M.D.	Principal Investigator
NCT00741403	Senzer Neil, M.D.	Principal Investigator
NCT00742404	James R. Berenson, MD	Principal Investigator
NCT00742560	Louie Naumovski, MD	Study Director
NCT00742573	Carlos Blanco, MD, PhD	Principal Investigator
NCT00743340	Erin Quirk, MD	Study Director
NCT00743496	Michael Bishop, MD	Principal Investigator
NCT00745134	Sunil Krishnan, MD	Principal Investigator
NCT00745420	Mary Horowitz, MD	Study Director
NCT00745615	Giancarlo Comi	Principal Investigator
NCT00746746	Adam I Riker, MD	Principal Investigator
NCT00748657	Jubilee Brown	Principal Investigator
NCT00749892	Arlene Siefker-Radtke, MD	Principal Investigator
NCT00749957	J Timothy Stout, MD, PhD, MBA	Principal Investigator
NCT00752206	Kristin Baird, MD	Principal Investigator
NCT00755040	Madan Jagasia, MD	Principal Investigator
NCT00756600	Andrew Davidson, MD	Principal Investigator
NCT00756600	Mary Ellen McCann, MD	Principal Investigator
NCT00756600	Neil Morton, MD	Principal Investigator
NCT00757549	Jann N. Sarkaria, MD	Study Chair
NCT00759291	Joshua A. Beckman, M.D.	Principal Investigator
NCT00759642	Priyanka Sharma, MD	Principal Investigator
NCT00759772	Pouneh K Fazeli, MD	Principal Investigator
NCT00759798	William Wierda, M.D.	Principal Investigator
NCT00760981	David Miklos	Principal Investigator
NCT00761722	Barry Skikne, MD, FACP, FCP (SA)	Study Director
NCT00764517	Stephen Spurgeon	Principal Investigator
NCT00765921	Ivana Kim, M.D.	Principal Investigator
NCT00766753	Frank Lieberman, MD	Principal Investigator
NCT00767624	Rachel Manber	Principal Investigator
NCT00767949	Glenn Stoller, MD	Study Director
NCT00769379	Melody Cobleigh	Principal Investigator
NCT00769483	Milind Javle, MD	Principal Investigator
NCT00769613	Kenneth G. Lucas, MD	Principal Investigator
NCT00770120	Linda Garland, MD	Study Chair
NCT00770120	Sai-Hong I. Ou, MD, PhD	Study Chair
NCT00770224	Jonathan W. Friedberg, MD	Study Chair
NCT00770224	Lisa Rimsza, MD	Study Chair
NCT00770224	Oliver W. Press, MD, PhD	Study Chair
NCT00770809	Lisa Carey	Principal Investigator
NCT00772486	Januario Castro, MD	Principal Investigator
NCT00772915	Shaji K. Kumar, MD	Study Chair
NCT00773422	Sherry A McKee, PhD	Principal Investigator
NCT00774345	Kenichi Takechita, MD	Study Director
NCT00775931	Paul Orchard, MD	Principal Investigator
NCT00776594	Mary-Ellen Taplin, MD	Principal Investigator
NCT00776867	Ira Dunkel, MD	Principal Investigator
NCT00777153	Jane Robertson	Study Director
NCT00777153	Tracy Batchelor, MD, MPH	Principal Investigator
NCT00777491	Cheryl T. Lee, MD	Study Chair
NCT00777491	Chin-Lee Wu, MD, PhD	Study Chair
NCT00777491	John J. Coen, MD	Principal Investigator
NCT00777491	Philip J. Saylor, MD	Study Chair
NCT00777673	Jasgit C. Sachdev, MD	Principal Investigator
NCT00777881	Robert Redner, MD	Principal Investigator
NCT00779168	Przemyslaw W. Twardowski, MD	Principal Investigator
NCT00780234	Robert L. Keith, MD	Principal Investigator
NCT00782288	Pamela L Zeitlin, MD, PhD	Principal Investigator
NCT00782574	J Ballmana Gelpi	Principal Investigator
NCT00782574	Jane Robertson, BSc, MBCHB, MD	Study Director
NCT00782574	Judy E Garber	Principal Investigator
NCT00783367	Stephen J Schuster, MD	Principal Investigator
NCT00785291	Hope Rugo	Principal Investigator
NCT00787059	Amit Patel, MD	Principal Investigator
NCT00787059	Clyde W Yancy, MD	Principal Investigator
NCT00787059	David R Murray, MD	Principal Investigator
NCT00787059	Eric D Adler, MD	Principal Investigator
NCT00787059	H. Kirk Hammond, MD	Study Director
NCT00787059	Jay H Traverse, MD	Principal Investigator
NCT00787059	Matthew W Watkins, MD	Principal Investigator
NCT00787059	William Penny, MD	Principal Investigator
NCT00787969	David J. Inwards, MD	Study Chair
NCT00788112	Laura Esserman, MD, MBA	Principal Investigator
NCT00788125	Judith K. Sato, MD	Principal Investigator
NCT00788684	Mack Mabry, MD	Study Director
NCT00788775	F. Stephen Hodi, MD	Principal Investigator
NCT00789581	Denise A Yardley, M.D.	Study Chair
NCT00789633	Gaël Deplanque, MD	Principal Investigator
NCT00789776	Brenda Sandmaier	Principal Investigator
NCT00789958	Edgar Ben-Josef, MD	Principal Investigator
NCT00790010	F. Stephen Hodi, MD	Principal Investigator
NCT00790335	Clive Kearon, MB, MRCP, FRCP(C), PhD	Principal Investigator
NCT00790335	Samuel Z Goldhaber, M.D.	Study Chair
NCT00790335	Suresh Vedantham, M.D.	Principal Investigator
NCT00790582	Robert G Miller, MD	Study Director
NCT00790842	Joseph R. Mikhael, MD	Study Chair
NCT00790868	David F Tolin, PhD	Principal Investigator
NCT00790868	Mark H Pollack, MD	Principal Investigator
NCT00790868	Michael W Otto, PhD	Study Chair
NCT00791037	Mary Disis	Principal Investigator
NCT00791076	Dariush Elahi, PhD	Principal Investigator
NCT00792142	Firoozeh Sahebi, MD	Principal Investigator
NCT00792701	Ralph G. Zinner, MD	Study Chair
NCT00792948	Farhad Ravandi-Kashani	Principal Investigator
NCT00793572	Marco Mielcarek	Principal Investigator
NCT00794339	David A. Mankoff, MD, PhD	Study Chair
NCT00794339	Farrokh Dehdashti, MD	Principal Investigator
NCT00794950	Alon Weizer, MD	Principal Investigator
NCT00796562	Heather Symons, M.D.	Principal Investigator
NCT00796978	Cynthia Owusu, MD, MSC	Principal Investigator
NCT00798655	Robert Ferris, MD	Principal Investigator
NCT00798720	Tien Hoang, M.D.	Principal Investigator
NCT00799110	David Avigan, MD	Principal Investigator
NCT00799617	Peter J Snyder, MD	Principal Investigator
NCT00802412	Robert M. Anthenelli, MD	Principal Investigator
NCT00803972	Jolene K Berg, MD	Principal Investigator
NCT00804336	Jennifer Ang Chan, MD, MPH	Principal Investigator
NCT00805129	Dean Bajorin, MD	Principal Investigator
NCT00807365	Dariush Elahi, PhD	Principal Investigator
NCT00807365	Kenneth L. Minaker, MD	Principal Investigator
NCT00807586	Daniel P Melby, MD	Principal Investigator
NCT00807599	Hani Hassoun, MD	Principal Investigator
NCT00807768	Marcus Randall	Principal Investigator
NCT00807963	Emanuel P DeNoia, MD	Principal Investigator
NCT00808314	Timothy M Bateman, MD	Principal Investigator
NCT00808639	Toni Choueiri, MD	Principal Investigator
NCT00810797	George Somlo, MD	Principal Investigator
NCT00810888	Edward C. Jauch, MD, MS	Principal Investigator
NCT00810888	Matthew L. Flaherty, MD	Principal Investigator
NCT00813293	Rebecca A Miksad, MD, MPH	Principal Investigator
NCT00813423	Janice Mehnert	Principal Investigator
NCT00813826	Kevin Pojasek, PhD	Study Director
NCT00814294	David Orloff, MD	Study Director
NCT00814294	Len Rosenberg, PhD, RPh	Study Director
NCT00815035	Wesley Burks, MD	Principal Investigator
NCT00816595	Jose F. Francisco, M.D.	Principal Investigator
NCT00816595	Tait D. Shanafelt, MD	Study Chair
NCT00819546	Richard Stone, MD	Principal Investigator
NCT00820170	Monica Fornier, MD	Principal Investigator
NCT00820872	Edith A. Perez, MD	Study Chair
NCT00821964	Lupe Salazar	Principal Investigator
NCT00822120	Oliver W. Press, MD, PhD	Study Chair
NCT00822848	Christopher W. Ryan, MD	Principal Investigator
NCT00823212	Peter M Maurer, MPH	Study Director
NCT00823797	Maciej Mrugala	Principal Investigator
NCT00824135	Brandon Triplett, MD	Principal Investigator
NCT00824200	Theodore Johnson II, MD, MPH	Principal Investigator
NCT00824993	Huifang Lu, MD, PHD	Principal Investigator
NCT00825201	Mihaela Cristea, MD	Principal Investigator
NCT00825201	Mihaela Cristea, MD	Study Chair
NCT00825656	Martha White, MD	Principal Investigator
NCT00825721	Reeta Gurung, MD	Principal Investigator
NCT00825721	Sanduk Ruit, MD	Principal Investigator
NCT00825942	Ira Wong, MD	Study Director
NCT00826202	Daniel C Javitt, MD, PhD	Principal Investigator
NCT00826241	Marta Penas-Prado, MD	Principal Investigator
NCT00826540	Axel Grothey, MD	Study Chair
NCT00827359	David F McDermott, MD	Principal Investigator
NCT00830544	Fernando Cabanillas, MD	Principal Investigator
NCT00831766	Jeffrey Lancet, M.D.	Principal Investigator
NCT00831792	Paul Corn, MD, PHD	Principal Investigator
NCT00833261	Lucien A. Nedzi, MD	Principal Investigator
NCT00834093	Jochen Lorch, MD	Principal Investigator
NCT00834665	Carl H June, MD	Study Chair
NCT00837928	John C. Grecula, MD	Principal Investigator
NCT00838435	Suyash Prasad, M.D.	Study Director
NCT00838656	Christopher Poole, MD	Principal Investigator
NCT00839956	Leona Holmberg	Principal Investigator
NCT00840931	Javier Pinilla, M.D., Ph.D.	Principal Investigator
NCT00841074	Catherine J Binkley, DDS, PhD	Principal Investigator
NCT00841802	Robert P Schleimer, PhD	Principal Investigator
NCT00843531	Emily K. Bergsland, MD	Principal Investigator
NCT00843882	Alan List	Principal Investigator
NCT00844831	John Wo, MD	Principal Investigator
NCT00846430	Albert S Cornelius, MD	Principal Investigator
NCT00847171	Leisha A. Emens, MD, PhD	Principal Investigator
NCT00847912	Martin A. Weinstock, MD	Study Chair
NCT00848328	Joseph M. Tuscano, MD	Principal Investigator
NCT00849121	Douglas McNeel, MD	Principal Investigator
NCT00851877	Hak Choy, MD	Principal Investigator
NCT00852787	Deepak Malhotra, MD, PhD	Principal Investigator
NCT00853125	Roger Strair, MD, PhD	Principal Investigator
NCT00853580	Jonathan Payne, MD	Study Director
NCT00853580	Kathryn North, MD	Principal Investigator
NCT00853580	Maria Acosta, MD	Study Director
NCT00856245	Siddhartha Ganguly, MD	Principal Investigator
NCT00856401	John P Bilezikian, MD	Principal Investigator
NCT00856492	Zeina Nahleh, MD	Principal Investigator
NCT00857025	Marianna Koczywas, MD	Principal Investigator
NCT00857389	Laura L. Worth, MD, PhD	Principal Investigator
NCT00857545	Paul Sabbatini	Principal Investigator
NCT00858117	Olga Frankfurt, MD	Principal Investigator
NCT00858429	Mary Mulcahy, MD	Principal Investigator
NCT00859222	Patrick Y. Wen, MD	Principal Investigator
NCT00859456	Robert N Taub, MD, PhD	Principal Investigator
NCT00859716	Mohamed Al-Ibrahim, MD	Principal Investigator
NCT00859937	Stuart Wong	Principal Investigator
NCT00860379	Maggie L Dylewski, PhD,RD	Principal Investigator
NCT00860522	David F Claxton, MD	Principal Investigator
NCT00861406	Wen-Jen Hwu, MD, PhD	Principal Investigator
NCT00861913	Amy Weise	Principal Investigator
NCT00863369	Leslie Popplewell, MD	Principal Investigator
NCT00865566	Magdalena Sobieszczyk	Study Chair
NCT00865566	Michael Yin	Study Chair
NCT00865566	Scott Hammer	Study Chair
NCT00866749	Michael E. Rytting, M.D.	Principal Investigator
NCT00866879	Lorenzo Gallon, MD	Principal Investigator
NCT00866918	John Gregory, MD	Principal Investigator
NCT00867048	Abdel Babiker, PhD	Study Chair
NCT00867048	Fred Gordin, MD	Study Chair
NCT00867048	James D Neaton, PhD	Principal Investigator
NCT00867048	Jens Lundgren, MD, DMSc	Study Chair
NCT00867048	Sean Emery, PhD	Study Chair
NCT00867217	Qamar J Khan, MD	Principal Investigator
NCT00867529	David Maloney	Principal Investigator
NCT00868114	Emmanuel E Zervos, MD	Principal Investigator
NCT00869024	Ganesh Raveendran, MD	Principal Investigator
NCT00869206	Andrew L. Himelstein, MD	Study Chair
NCT00869401	Nadia N. Laack, MD	Study Chair
NCT00870779	David W Roberts, MD	Principal Investigator
NCT00870779	Keith Paulsen, PhD	Principal Investigator
NCT00870987	Judith Epstein, MD	Principal Investigator
NCT00871923	James Welsh, MD	Principal Investigator
NCT00872911	Elena Volpi, MD,PhD	Principal Investigator
NCT00872989	Robert L. Coleman, MD	Study Chair
NCT00873093	Terzah Horton	Principal Investigator
NCT00873275	Lily L. Lai, MD	Principal Investigator
NCT00876902	Stefan Hemmerich, PhD	Study Director
NCT00877500	Funda Meric-Bernstam, MD	Principal Investigator
NCT00878163	Charles Erlichman	Principal Investigator
NCT00878904	Pamela N. Munster, MD	Principal Investigator
NCT00879177	William B White, M.D.	Principal Investigator
NCT00879489	Paul O. Schwarzenberger, M.D.	Principal Investigator
NCT00880464	Beth Overmoyer, MD	Principal Investigator
NCT00880581	Ronald Levy	Principal Investigator
NCT00880919	S. Charles Schulz, MD	Principal Investigator
NCT00881361	Judy Boughey, MD	Study Chair
NCT00881556	Angela Christiano, PhD	Principal Investigator
NCT00883129	Donald P. Tashkin, MD	Principal Investigator
NCT00883129	Michael D. Roth, MD	Principal Investigator
NCT00883129	Robert M. Elashoff, PhD	Principal Investigator
NCT00883298	Michael A. Badurddoja, MD	Principal Investigator
NCT00884312	Kanya Rajangam, MD	Study Director
NCT00884741	Mark Gilbert	Principal Investigator
NCT00885326	Julia L. Glade-Bender, MD	Principal Investigator
NCT00885495	Carl J Fichtenbaum, MD	Principal Investigator
NCT00885664	Carl J Fichtenbaum, MD	Principal Investigator
NCT00885703	Robert A. Larsen, MD	Study Chair
NCT00885703	Umesh G. Lalloo, MD, FRCP	Study Chair
NCT00886028	Elena Arechaga Ocampo, PhD.	Study Chair
NCT00886028	Enrique Estrada Lobato, M.D.	Study Chair
NCT00886028	Luis Alberto Medina Velázquez, PhD.	Study Chair
NCT00886028	Luisa Geraldine Villanueva Rodríguez, M.D	Study Chair
NCT00886028	Miguel Angel Ríos Trejo, M.D.	Study Chair
NCT00886028	Victoria López Rodrígez, Q.F.B.	Study Chair
NCT00886691	William P. Tew, MD	Study Chair
NCT00887159	Chandra Belani	Principal Investigator
NCT00887536	Norman Wolmark, MD	Principal Investigator
NCT00888173	Matthew Powell	Principal Investigator
NCT00888628	James F Markmann, MD, PhD	Principal Investigator
NCT00889408	Verokina Bachanova, MD	Principal Investigator
NCT00890032	Gordana Vlahovic, MD	Principal Investigator
NCT00890617	Frank A. Baciewicz, MD	Principal Investigator
NCT00890786	Maryam Fouladi, MD	Principal Investigator
NCT00890825	Dr Pasi Janne	Principal Investigator
NCT00890825	Gabriella Mariani	Study Director
NCT00891527	Kathy J Jenkins, MD, MPH	Principal Investigator
NCT00892177	Evanthia Galanis, MD	Study Chair
NCT00892736	Shannon Puhalla	Principal Investigator
NCT00895661	Jeremy Abramson, MD	Principal Investigator
NCT00899431	Issa F. Khouri, MD, BS	Study Chair
NCT00899847	Wen-Kai Weng	Principal Investigator
NCT00900809	Michael Boyiadzis, MD	Principal Investigator
NCT00901069	Hayslip W John, MD	Principal Investigator
NCT00902018	James B Bussel, MD	Principal Investigator
NCT00902577	Elizabeth Gerstner	Principal Investigator
NCT00903461	Julie Bauman, MD	Principal Investigator
NCT00903968	Irene Ghobrial, MD	Principal Investigator
NCT00904033	Luke J Peppone, Ph.D.	Principal Investigator
NCT00904345	Shruti Jolly, MD	Principal Investigator
NCT00906945	Geoffrey L. Uy, M.D.	Principal Investigator
NCT00907166	Avi Retter, M.D.	Principal Investigator
NCT00907166	Neil Senzer, M.D.	Principal Investigator
NCT00908791	Margit M McGowan, DO	Principal Investigator
NCT00909090	Billy R Hammond, Ph.D.	Principal Investigator
NCT00909831	Ravi Amaravadi, MD	Principal Investigator
NCT00910910	Oliver Kong, MD	Study Director
NCT00911820	Peter C. Enzinger, MD	Principal Investigator
NCT00912223	Mary Horowitz, MD, MS	Study Director
NCT00912340	Elisavet Paplomata, MD	Principal Investigator
NCT00912691	Eugene Arnold, MD	Principal Investigator
NCT00914940	Marie Bleakley, MD	Principal Investigator
NCT00914940	Warren Shlomchik, MD	Principal Investigator
NCT00915005	Zhongxing Liao, MD	Study Chair
NCT00915694	Jay F. Dorsey, MD, PhD	Principal Investigator
NCT00916123	Scott Tagawa, M.D.	Principal Investigator
NCT00916409	Eric T. Wong, MD	Study Director
NCT00916409	Herbert H. Engelhard, MD, PhD	Study Director
NCT00916409	Manfred Westphal, Prof. MD	Study Director
NCT00916409	Philip H. Gutin, MD	Study Director
NCT00916409	Roger Stupp, MD	Study Director
NCT00916578	Wendy Woodward, MD, PHD	Study Chair
NCT00916747	Mark Kieran, MD, PhD	Principal Investigator
NCT00917462	David Ilson, MD	Principal Investigator
NCT00918333	Shaji Kumar	Principal Investigator
NCT00918723	Mazyar Shadman	Principal Investigator
NCT00920023	Ralph Weissleder, MD, PhD	Principal Investigator
NCT00920699	Christopher A Ross, MD, PhD	Principal Investigator
NCT00920699	Kevin M Biglan, MD, MPH	Principal Investigator
NCT00921310	Maria Baggstrom, M.D.	Principal Investigator
NCT00921557	George K. Siberry, MD	Study Chair
NCT00922883	Cynthia E Dunbar, M.D.	Principal Investigator
NCT00923247	Ravi A Madan, M.D.	Principal Investigator
NCT00923351	John Glod, M.D.	Principal Investigator
NCT00923364	Dennis D Hickstein, M.D.	Principal Investigator
NCT00923845	Daniel H Fowler, M.D.	Principal Investigator
NCT00924326	Steven A Rosenberg, M.D.	Principal Investigator
NCT00924703	Celeste Decker, MD	Study Director
NCT00925314	Gregory Daniels, MD, PhD	Principal Investigator
NCT00926380	Benjamin Z Leder, MD	Principal Investigator
NCT00926380	Robert M Neer, MD	Principal Investigator
NCT00928135	Jan L Launspach, R.N., CCRC	Study Chair
NCT00928135	Joseph Zabner, M.D.	Principal Investigator
NCT00928135	Lakshmi Durairaj, M.D.	Study Director
NCT00929214	Eric A. Strom, MD, BS	Principal Investigator
NCT00929344	Barbara J Mason, Ph.D.	Principal Investigator
NCT00930579	Dawn L Hershman, MD	Principal Investigator
NCT00931840	Richard M. Goldberg, MD	Principal Investigator
NCT00932113	Alice B. Gottlieb, M.D., PhD.	Principal Investigator
NCT00932828	Arvil W Burks, MD	Principal Investigator
NCT00934427	Jeff Gregory, MD	Study Director
NCT00934440	Peter J Van Veldhuizen, MD	Principal Investigator
NCT00934895	Deborah L. Toppmeyer, MD	Principal Investigator
NCT00936390	Alvaro A. Martinez, MD, FACR	Study Chair
NCT00936611	Irene Ghobrial, MD	Principal Investigator
NCT00936858	Jochen Lorch, MD	Principal Investigator
NCT00937937	Christopher Lao	Principal Investigator
NCT00938470	Steven R. Alberts, MD	Study Chair
NCT00939770	Yael P. Mosse, MD	Study Chair
NCT00939822	Cynthia M. Carlsson, MD, MS	Principal Investigator
NCT00940316	Al Benson, MD	Principal Investigator
NCT00940771	Janice Piatt, MD	Principal Investigator
NCT00941720	Ronald M. Sobecks, MD	Principal Investigator
NCT00942331	Jonathan Rosenberg	Principal Investigator
NCT00942357	Daniela Matei	Principal Investigator
NCT00942578	William L Dahut, M.D.	Principal Investigator
NCT00943319	Andrew Artz, MD	Principal Investigator
NCT00943618	Paul M Cinciripini, PhD	Principal Investigator
NCT00943943	Michael Andreeff, MD, PhD	Principal Investigator
NCT00944047	Qamar Khan, MD	Principal Investigator
NCT00944749	Danielle M Townsley, M.D.	Principal Investigator
NCT00945815	Anjali Advani, MD	Study Chair
NCT00946088	Deirdre Judith Lyell	Principal Investigator
NCT00946270	Srdan Verstovsek, MD	Principal Investigator
NCT00946673	Griffith R. Harsh	Principal Investigator
NCT00946712	Roy Herbst	Principal Investigator
NCT00947011	Dariush Elahi, PhD	Principal Investigator
NCT00948064	Guillermo Garcia-Manero, MD	Principal Investigator
NCT00948688	Lawrence Blaszkowsky, MD	Principal Investigator
NCT00948740	Jie Tang, M.D., M.Sc	Principal Investigator
NCT00948753	David Porter, MD	Principal Investigator
NCT00948922	Melissa Alsina, MD	Principal Investigator
NCT00949949	Brian Costello	Principal Investigator
NCT00949988	Januario Castro, M.D.	Principal Investigator
NCT00949988	Thomas J Kipps, M.D., Ph.D.	Principal Investigator
NCT00950248	Bibiana Bielekova, M.D.	Principal Investigator
NCT00951496	Joan Walker	Principal Investigator
NCT00954174	Matthew Powell	Principal Investigator
NCT00954226	William N. William Jr., MD	Study Chair
NCT00954278	Anne M Traynor, M.D.	Principal Investigator
NCT00954707	Daniel Simon, M.D.	Principal Investigator
NCT00954707	David Kandzari, M.D.	Principal Investigator
NCT00955006	Janine Maenza	Study Chair
NCT00956332	Sam L. Teichman, MD	Study Director
NCT00957359	Anthony Bossis, PhD	Study Chair
NCT00957359	Jeffrey Guss, MD	Study Director
NCT00957359	Stephen Ross, MD	Principal Investigator
NCT00957853	William N. William Jr., MD	Study Chair
NCT00960752	Richard Royal, MD	Principal Investigator
NCT00961220	Kevin Cooper	Principal Investigator
NCT00961961	John M Zajecka, MD	Principal Investigator
NCT00961961	Robert J. DeRubeis, PhD	Principal Investigator
NCT00962845	Janice M. Mehnert, MD	Principal Investigator
NCT00963105	Kenichi Takeshita, M.D., MPH	Study Director
NCT00963274	Amy Kimball, MD, PhD	Principal Investigator
NCT00963274	Beata Holkova, MD	Principal Investigator
NCT00963274	Nishitha Reddy, MBBS	Principal Investigator
NCT00963274	Sho Ma, MD, PhD	Principal Investigator
NCT00963274	Steven Grant, MD	Study Chair
NCT00963274	Thomas C. Shea, MD	Principal Investigator
NCT00963781	David E Kandzari, MD	Principal Investigator
NCT00963781	Eric J. Topol, MD	Principal Investigator
NCT00963781	Paul S. Teirstein, MD	Principal Investigator
NCT00964080	Jaffer A. Ajani, MD	Principal Investigator
NCT00964353	David O Meltzer, MD, PhD	Principal Investigator
NCT00964886	Joseph H Atkinson, MD	Principal Investigator
NCT00965250	Giuseppe Giaccone, M.D.	Principal Investigator
NCT00966654	Dariush Elahi, PhD	Principal Investigator
NCT00966693	Jatin J. Shah, MD	Study Chair
NCT00967005	Jon E Grant, MD, JD, MPH	Principal Investigator
NCT00967005	Marc N Potenza, MD, PhD	Principal Investigator
NCT00967369	Michelle A. Fanale, MD	Study Chair
NCT00968110	Dale Umetsu, MD	Principal Investigator
NCT00968760	Partow Kebriaei, MD	Study Chair
NCT00970905	Steven Ades, MD MSc	Principal Investigator
NCT00971737	Leisha A. Emens, MD, PhD	Principal Investigator
NCT00972478	Daniel Persky	Principal Investigator
NCT00972933	Ahmad Tarhini, MD	Principal Investigator
NCT00974142	Michael Donahoe, MD	Principal Investigator
NCT00975819	Denise M Adams, MD	Principal Investigator
NCT00976131	Heather Greenlee, ND, PhD	Principal Investigator
NCT00976248	Steven Treon, MD	Principal Investigator
NCT00976573	Robert McWilliams, MD	Study Chair
NCT00977470	Lecia Sequist, MD	Principal Investigator
NCT00977574	Carol Aghajanian	Principal Investigator
NCT00977691	Courtney D Fitzhugh, M.D.	Principal Investigator
NCT00979212	Martin J. Edelman, MD	Principal Investigator
NCT00979992	John Chan	Principal Investigator
NCT00980395	Soham D Puvvada, MD	Principal Investigator
NCT00981747	Alicia K Gerke, MD	Principal Investigator
NCT00982787	Siegward M Elsas, M.D.	Principal Investigator
NCT00982982	Deepak C D'Souza, M.D	Principal Investigator
NCT00983580	Frank Sinicrope	Principal Investigator
NCT00985517	Raymond T Bartus, Ph.D.	Study Director
NCT00986609	Joseph Baar, MD	Principal Investigator
NCT00987389	David Jayne, MD	Principal Investigator
NCT00987389	Michael Walsh, MD	Principal Investigator
NCT00987389	Peter Merkel, MD, MPH	Principal Investigator
NCT00987480	Faird Boulad, MD	Principal Investigator
NCT00987766	Laura Goff, MD	Principal Investigator
NCT00987948	Cecilia M Shikuma, M.D.	Principal Investigator
NCT00988052	Giancarlo Comi, Prof., MD	Principal Investigator
NCT00988208	Debora Barton, MD	Study Director
NCT00988429	Patrício Soares-da-Silva, MD, PHD	Study Director
NCT00988715	Brenda Sandmaier	Principal Investigator
NCT00989651	Katherine Bell-McGuinn	Principal Investigator
NCT00992446	Leona Holmberg	Principal Investigator
NCT00993759	Ronald Turner, MD	Principal Investigator
NCT00994643	Matthew Carabasi, MD	Principal Investigator
NCT00995150	Andrea Olariu, MD, PhD	Study Director
NCT00996073	Roger Brown	Study Director
NCT00997035	Nisha Acharya, MD, MS	Principal Investigator
NCT00997035	NV Prajna, DNB, FRC Ophth	Principal Investigator
NCT00997035	Tom Lietman, MD	Principal Investigator
NCT00997334	David Jackman, MD	Principal Investigator
NCT00998010	Albert Lai, MD, PhD	Principal Investigator
NCT00999609	Albert M Maguire, MD	Principal Investigator
NCT00999609	Stephen R Russell, MD	Principal Investigator
NCT00999804	Mothaffar Rimawi, MD	Principal Investigator
NCT01000051	Uday Popat, MD	Study Chair
NCT01000285	Lee Ratner, M.D., Ph.D.	Principal Investigator
NCT01000987	Sherry A McKee, PhD	Principal Investigator
NCT01001442	Kenneth C. Anderson, MD	Study Director
NCT01001754	Jan Hillson, MD	Study Director
NCT01002547	Kenneth Cusi, PhD	Principal Investigator
NCT01002755	Alessandra Ferrajoli, MD	Study Chair
NCT01002924	Siu-Long Yao	Study Director
NCT01003912	Joanne Kurtzberg, MD	Principal Investigator
NCT01004172	Nancy Lin, MD	Principal Investigator
NCT01004874	Annick Desjardins, MD, FRCPC	Principal Investigator
NCT01004978	Jean-Francois (Jeff) Geschwind	Principal Investigator
NCT01005108	Jun J Mao, MD, MSCE	Principal Investigator
NCT01005472	Bartosz Chmielowski, MD	Principal Investigator
NCT01005576	Shalini Shenoy, MD	Principal Investigator
NCT01005797	Harry Drabkin, MD	Principal Investigator
NCT01007630	Grace S Liang, MD	Principal Investigator
NCT01008150	Norman Wolmark, MD	Principal Investigator
NCT01008917	Alan P Venook, MD	Principal Investigator
NCT01008917	Robin K Kelley, MD	Principal Investigator
NCT01009437	David A. Potter, M.D., Ph.D.	Principal Investigator
NCT01009788	Steven Isakoff, MD, PhD	Principal Investigator
NCT01009918	Maya Guglin, MD, PhD	Study Chair
NCT01009918	Pamela N. Munster, MD	Study Chair
NCT01010126	Charles Erlichman	Principal Investigator
NCT01010217	Stefan Ciurea, MD	Study Chair
NCT01011010	Hanna H. Sanoff, MD	Principal Investigator
NCT01011218	Oxana RG Palesh, PhD, MPH	Principal Investigator
NCT01011374	Lawrence J Singerman, MD	Principal Investigator
NCT01011439	Anna Petroccione, MD	Study Director
NCT01011439	Arun Rajan, MD.	Principal Investigator
NCT01011439	Benjamin Besse, MD	Principal Investigator
NCT01011439	Glen Weiss, MD	Principal Investigator
NCT01011439	Julien Mazières, MD	Principal Investigator
NCT01011439	Marina C Garassino, MD	Principal Investigator
NCT01011439	Silvia Novello, MD	Principal Investigator
NCT01013285	Albert Lai, MD	Principal Investigator
NCT01013441	Chitra Hosing, MD	Principal Investigator
NCT01013441	Stephen J Schuster, MD	Principal Investigator
NCT01013870	Claudia S Robertson, MD	Principal Investigator
NCT01014598	Chukwumere Nwogu	Principal Investigator
NCT01015222	Filip Janku, MD,PHD	Principal Investigator
NCT01015833	Ghassan Abou-Alfa	Principal Investigator
NCT01016730	Erin Reid	Principal Investigator
NCT01016769	David Pfister, MD	Principal Investigator
NCT01017601	Julian Molina, MD, PhD	Study Chair
NCT01019187	Michael Perlis, MD	Principal Investigator
NCT01020539	Monica Bhatia, MD	Principal Investigator
NCT01021241	Alan Kivitz, MD	Principal Investigator
NCT01021241	Anthony S Fiorino, MD, PhD	Study Director
NCT01022021	Siddhartha Ganguly, MD	Principal Investigator
NCT01022138	Amy Weise, M.D.	Principal Investigator
NCT01022580	Roberta A Ballard, MD	Principal Investigator
NCT01023477	Kirsten H Edmiston, MD, FACS	Principal Investigator
NCT01023477	Priscilla McAuliffe, MD, PhD	Principal Investigator
NCT01024010	Han W. Tun, M.D.	Principal Investigator
NCT01024010	Jose Leis, M.D.	Principal Investigator
NCT01024010	Tait Shanafelt, M.D.	Study Chair
NCT01024387	Matthew Kulke, MD	Principal Investigator
NCT01025427	Hiroyu Hatano, MD	Principal Investigator
NCT01025453	Eric Sherman, MD	Principal Investigator
NCT01026220	Kara Kelly, MD	Principal Investigator
NCT01026493	H. Ian Robins, MD, PhD	Principal Investigator
NCT01026987	John DiPersio, M.D., Ph.D.	Principal Investigator
NCT01027000	Edwin P. Alyea, MD	Study Chair
NCT01027702	Andrew Gilman, MD	Principal Investigator
NCT01027754	Shadi Nahvi, M.D., M.S.	Principal Investigator
NCT01027949	Kevin Laliberte, PharmD	Study Director
NCT01029054	Mark Kaminski, M.D.	Principal Investigator
NCT01029262	Albert Hoenekopp, MD	Study Director
NCT01030900	Wyndham H Wilson, M.D.	Principal Investigator
NCT01031446	Ingrid Mayer, MD	Principal Investigator
NCT01034254	Mark C Steinhoff, MD	Principal Investigator
NCT01034631	Thomas Hutson, D.O.	Study Chair
NCT01036087	Naoto Ueno, MD, PHD	Study Chair
NCT01036113	Joyce A O'Shaughnessy, MD	Principal Investigator
NCT01036321	Nagi Kumar, Ph.D.	Principal Investigator
NCT01036594	Charles J. Ryan, MD	Principal Investigator
NCT01037621	Mary Jane Burton, M.D.	Principal Investigator
NCT01038388	Jonathan Kaufman, MD	Principal Investigator
NCT01038583	John McNeil, MBBS, PHD	Principal Investigator
NCT01038583	Richard Grimm, MD, PHD	Principal Investigator
NCT01040000	Philip M Arlen, M.D.	Study Director
NCT01040221	Eric Hollander, MD	Principal Investigator
NCT01041274	Donald C Goff, MD	Principal Investigator
NCT01041521	Christine A Wanke, MD	Principal Investigator
NCT01041781	Martin J. Edelman, MD	Study Chair
NCT01042158	Paul Hassoun, MD	Principal Investigator
NCT01042535	Hatem Soliman	Principal Investigator
NCT01043640	Paul Orchard, MD	Principal Investigator
NCT01044238	Maureen Hillhouse, Ph.D.	Study Director
NCT01044238	Walter Ling, M.D.	Principal Investigator
NCT01044433	Corey Langer	Principal Investigator
NCT01044745	Robert Bociek	Principal Investigator
NCT01046604	Ethan J Anderson, PhD	Principal Investigator
NCT01047319	Prof. Timothy Vollmer, MD	Principal Investigator
NCT01047722	Jeffrey A Klein, MD	Principal Investigator
NCT01048827	Thomas Martin, MD	Study Chair
NCT01049451	Regina R Berkovich, MD, PhD	Principal Investigator
NCT01049841	Ira Dunkel, MD	Principal Investigator
NCT01049854	Mitchell S Cairo, MD	Principal Investigator
NCT01049945	Shaji K. Kumar, M.D.	Study Chair
NCT01049945	Vivek Roy, M.D.	Principal Investigator
NCT01050647	Yasser Y El-Sayed, MD	Principal Investigator
NCT01050842	Erik P. Castle, M.D.	Study Chair
NCT01051557	Thomas Kaley	Principal Investigator
NCT01054079	K.C. Balaji, MD	Principal Investigator
NCT01054144	Rachid Baz, M.D.	Principal Investigator
NCT01055028	Kristen N. Ganjoo	Principal Investigator
NCT01056276	Jesus Berdeja, M.D.	Study Chair
NCT01056393	William Towner, MD	Principal Investigator
NCT01056965	Adam L. Boxer, M.D., Ph.D.	Principal Investigator
NCT01057225	Joseph R. Mikhael, M.D.	Study Chair
NCT01057862	Marc N Potenza, M.D., Ph.D.	Principal Investigator
NCT01058239	Jeremy Abramson, MD	Principal Investigator
NCT01058655	Brian Wolpin, MD	Principal Investigator
NCT01058941	Lynne Shinto, ND, MPH	Principal Investigator
NCT01059929	John P Kress, MD	Principal Investigator
NCT01060384	Julie M Vose	Principal Investigator
NCT01061411	Saby George	Principal Investigator
NCT01061775	M. Jennifer Abuzzahab, MD	Principal Investigator
NCT01061840	Minal Barve, MD	Principal Investigator
NCT01062399	Prakash Chinnaiyan, MD	Principal Investigator
NCT01062425	Tracy Batchelor	Principal Investigator
NCT01062451	Thomas F Newton, M.D.	Principal Investigator
NCT01064479	William N. William Jr., MD	Study Chair
NCT01064648	Anne Tsao	Principal Investigator
NCT01065129	Mark Schroeder, M.D.	Principal Investigator
NCT01065467	F. Stephen Hodi, MD	Principal Investigator
NCT01065662	Susana Campos, MD	Principal Investigator
NCT01065844	John M. Buatti, M.D.	Principal Investigator
NCT01066637	Robert J Gropler, MD	Principal Investigator
NCT01067144	Ian R Carroll	Principal Investigator
NCT01067287	David Avigan, MD	Principal Investigator
NCT01067469	John DeGroot, MD	Study Chair
NCT01068249	Robert Coleman, MD	Study Chair
NCT01068327	Chi Lin	Principal Investigator
NCT01068769	Suzanne George, MD	Principal Investigator
NCT01069510	Craig Broberg, MD	Principal Investigator
NCT01071941	Kenneth K. Tanabe, MD	Principal Investigator
NCT01074047	C L Beach, PharmD	Study Director
NCT01074411	Don Dizon	Principal Investigator
NCT01074554	Wonder P Drake, MD	Principal Investigator
NCT01074970	Kathy D. Miller, M.D.	Study Chair
NCT01075321	Craig Reeder, M.D.	Study Chair
NCT01075321	Thomas E. Witzig, M.D.	Principal Investigator
NCT01075412	Michael M Graham, Ph.D., M.D.	Study Director
NCT01075412	Sarah McGuire, Ph.D.	Principal Investigator
NCT01076543	Sonali Smith	Principal Investigator
NCT01078662	Bella Kaufman, MD	Principal Investigator
NCT01078662	Jane Robertson, BSc, MBCHB, MD	Study Director
NCT01080391	A. Keith Stewart, MD	Principal Investigator
NCT01080391	Antonio Palumbo, MD	Principal Investigator
NCT01080391	Philippe Moreau, MD	Principal Investigator
NCT01080391	S. Vincent Rajkumar, MD	Principal Investigator
NCT01081262	David Gershenson	Principal Investigator
NCT01081951	Amit Oza, MD	Principal Investigator
NCT01081951	Jane Robertson, BSc, MBCHB, MD	Study Director
NCT01082679	Randy Brown, MD, PhD	Principal Investigator
NCT01083316	Vaishali Sanchorawala, MD	Principal Investigator
NCT01084057	Yuan Yuan, MD, PhD	Principal Investigator
NCT01086332	Sudershan K. Bhatia, M.D., PhD	Study Director
NCT01086605	Alvaro Moreno-Asptia, MD	Study Chair
NCT01087554	Filip Janku, MD, PHD	Principal Investigator
NCT01088802	Arlene Forastiere, M.D.	Principal Investigator
NCT01088802	Quon Harry, M.D.	Principal Investigator
NCT01088815	Ana De Jesus-Acosta, MD	Principal Investigator
NCT01088815	Daniel Laheru, MD	Principal Investigator
NCT01089101	Jason Fangusaro	Principal Investigator
NCT01089361	Daniel Talmor, MD, MPH	Principal Investigator
NCT01089647	Ann Romaker, MD	Principal Investigator
NCT01090128	Hung Khong, MD	Principal Investigator
NCT01090414	Siddhartha Mitra, MD	Study Director
NCT01091454	Alvaro Moreno Aspitia, MD	Study Chair
NCT01091792	Camilo E Fadul, MD	Principal Investigator
NCT01093183	Jue Wang	Principal Investigator
NCT01093521	Christopher H Goss, MD, MSc	Principal Investigator
NCT01093573	Brenda Cooper, MD	Principal Investigator
NCT01095120	Jaffer Ajani, MD	Study Chair
NCT01095224	Xia Jin, MD, PhD	Study Chair
NCT01095822	Victor Serebruany, MD, PhD	Study Director
NCT01096992	William G. Wierda, MD, PhD, BS	Study Chair
NCT01097057	Leona Holmberg	Principal Investigator
NCT01097486	Roger Brown	Study Director
NCT01097642	Jenny Chang, MD	Principal Investigator
NCT01097694	Elliot Israel, M.D	Principal Investigator
NCT01097694	Joshua Boyce, M.D	Principal Investigator
NCT01097746	Anil Sood, MD	Principal Investigator
NCT01098266	Antonio Lambiase, MD	Study Director
NCT01100502	Naomi Hunder, MD	Study Director
NCT01100528	Pierre Triozzi	Principal Investigator
NCT01100775	L. E. Hong, M.D.	Principal Investigator
NCT01100944	Arun Rajan, M.D.	Principal Investigator
NCT01101581	William Wegener, MD, PhD	Study Chair
NCT01101880	Pamela Becker	Principal Investigator
NCT01102374	Adit A Ginde, MD, MPH	Principal Investigator
NCT01102426	Óscar F. Ballester, M.D.	Principal Investigator
NCT01102426	Rubén Niesvizky, M.D.	Principal Investigator
NCT01103635	Robert Vonderheide, MD, DPhil	Principal Investigator
NCT01103687	Lindsey Baden	Study Chair
NCT01104259	Jennifer Specht	Principal Investigator
NCT01105312	Winston Tan, MD, FACP	Study Chair
NCT01105546	Elena Santagostino, MD, PhD	Principal Investigator
NCT01106027	Mark Stegall, MD	Principal Investigator
NCT01106157	Michael J. Haller, MD	Principal Investigator
NCT01106833	Mary Horowitz, MD	Study Director
NCT01106872	Mohammed Milhem, MD	Principal Investigator
NCT01109004	Mary Horowitz, MD	Study Director
NCT01111058	Tanguy Seiwert, M.D.	Principal Investigator
NCT01111305	Amy D Klion, M.D.	Principal Investigator
NCT01111526	Lia Perez, MD	Principal Investigator
NCT01111994	Valerie Callender, MD	Principal Investigator
NCT01112306	Aline Frey	Study Director
NCT01112527	Tracy T. Batchelor, MD	Principal Investigator
NCT01113502	Noelle Frey, MD	Principal Investigator
NCT01113515	Vickie R Driver, DPM FACFAS	Principal Investigator
NCT01113970	Jonathan J. Lewis, MD, PhD	Study Director
NCT01114555	Shakeel Modak, MD	Principal Investigator
NCT01116648	Joyce Liu	Principal Investigator
NCT01118052	Ronald Alvarez	Principal Investigator
NCT01119664	Andrew Haas, MD, PhD	Principal Investigator
NCT01120236	Evan Yu	Principal Investigator
NCT01120249	Christopher W. Ryan, MD	Principal Investigator
NCT01120639	Scott Soltys	Principal Investigator
NCT01121120	Michael Schuster, MD	Principal Investigator
NCT01121224	Emmanouil S Brilakis, MD PhD	Study Chair
NCT01122199	Shadia I Jalal, MD	Study Chair
NCT01122901	David Peereboom	Principal Investigator
NCT01124539	James J Vredneburgh, MD	Principal Investigator
NCT01124734	Joseph J Drabick, MD	Principal Investigator
NCT01125046	Priya Kumthekar, MD	Principal Investigator
NCT01125293	Irene Ghobrial, MD	Principal Investigator
NCT01126736	Harish Dave	Study Director
NCT01127451	Harish Dave, MD	Study Director
NCT01128296	Herbert Zeh, MD	Principal Investigator
NCT01128582	Ronnie Fass, MD	Principal Investigator
NCT01129193	Craig Hofmeister	Principal Investigator
NCT01129453	Karen L Kotloff, M.D.	Principal Investigator
NCT01132014	Janos Tanyi, MD	Principal Investigator
NCT01132807	David J. Straus, MD	Principal Investigator
NCT01133275	Rami Komrokji, M.D.	Principal Investigator
NCT01133678	Everett Vokes, M.D.	Principal Investigator
NCT01134198	Wilfid N Raby, Md, PhD	Principal Investigator
NCT01134575	Hagop Kantarjian, MD	Study Chair
NCT01134614	Frank Hodi	Principal Investigator
NCT01136356	Eric Strain, M.D.	Principal Investigator
NCT01136772	Joseph P McEvoy, MD	Principal Investigator
NCT01136772	Scott Stroup, MD, MPH	Principal Investigator
NCT01136928	Adriana Andrade, MD, MPH	Principal Investigator
NCT01137695	Alan Schorr, DO	Principal Investigator
NCT01137695	Cheryl Rosenfeld, DO	Principal Investigator
NCT01137695	Jeffrey Rothman, MD	Principal Investigator
NCT01139294	Thomas J Abramo, MD	Principal Investigator
NCT01139970	Ivana Gojo	Principal Investigator
NCT01140178	Hassan Arshad, MD	Principal Investigator
NCT01140360	Kent Robertson, MD PhD	Principal Investigator
NCT01141309	Eric Sherman, MD	Principal Investigator
NCT01141491	William Tap, M.D.	Principal Investigator
NCT01142232	Attaya Suvannasankha, MD	Principal Investigator
NCT01142388	Steven Cohen	Principal Investigator
NCT01142401	Kerin Adelson	Principal Investigator
NCT01143402	Paul Chapman	Principal Investigator
NCT01143441	Bibiana Bielekova, M.D.	Principal Investigator
NCT01143779	Sarina Piha-Paul, MD	Principal Investigator
NCT01144338	Nardev Khurmi, MD	Study Director
NCT01145209	Inhye Ahn, M.D.	Principal Investigator
NCT01145430	Bhavana Pothuri	Principal Investigator
NCT01145495	Peter Martin	Principal Investigator
NCT01145508	Douglas McNeel	Principal Investigator
NCT01145807	Eduardo Tschen, MD	Principal Investigator
NCT01146054	Albert Koong	Principal Investigator
NCT01147107	Cecilia M Shikuma, M.D.	Principal Investigator
NCT01147107	Thuy Le, M.D.	Study Director
NCT01147107	Van Vinh Chau Nguyen, MD, PhD	Principal Investigator
NCT01147211	Chih-Hsin Yang, MD, Ph.D	Principal Investigator
NCT01148225	Andy Payne, PhD	Study Director
NCT01148849	Robert Lechleider, MD	Study Director
NCT01149083	Jeffrey Weitzel	Principal Investigator
NCT01149850	Phioanh Nghiemphu	Principal Investigator
NCT01150045	Jeffrey Meyerhardt, MD, MPH	Study Chair
NCT01151605	Paresh Dandona, MBBS	Principal Investigator
NCT01152541	Peter Hersh, MD	Principal Investigator
NCT01153243	Leon Fogelfeld, MD	Study Director
NCT01154387	Stuart Flechner, MD	Principal Investigator
NCT01154816	Yael Mosse	Principal Investigator
NCT01154920	Vali Papadimitrakopoulou, MD	Study Chair
NCT01155180	Christos S Mantzoros, MD	Principal Investigator
NCT01155284	Alex Rabinovitch, MD	Principal Investigator
NCT01155284	Diane L Hahn, LPN	Study Director
NCT01155583	Ehsan Malek, MD	Principal Investigator
NCT01155583	Frederic Reu	Principal Investigator
NCT01155817	David Miklos	Principal Investigator
NCT01155817	George Chen	Principal Investigator
NCT01156142	Robert C. Miller, MD	Study Chair
NCT01157091	Sumanta Pal	Principal Investigator
NCT01157416	Michael S Scheeringa, MD, MPH	Principal Investigator
NCT01157429	Michael S Scheeringa, MD, MPH	Principal Investigator
NCT01157975	Hesham Elkhayat, MD	Principal Investigator
NCT01157975	Mario Chojkier, MD	Principal Investigator
NCT01157975	Martina Buck, PhD	Principal Investigator
NCT01158105	Alan Miller, MD, PhD	Principal Investigator
NCT01158118	Mark Schroeder, M.D.	Principal Investigator
NCT01158222	Brian Rini	Principal Investigator
NCT01158417	Paresh Dandona, MD	Principal Investigator
NCT01158651	Bruce R. Korf, MD, PhD	Study Chair
NCT01158651	Mark Kieran, MD	Principal Investigator
NCT01159028	Jorge Cortes, MD	Study Chair
NCT01159028	Maro Ohanian, MD	Principal Investigator
NCT01159522	Muh-Hwan Su, Ph.D.	Study Director
NCT01159990	Esper Kallas, MD, PhD	Study Chair
NCT01160458	Raffit Hassan, M.D.	Principal Investigator
NCT01161524	Haichen Yang, M.D., M.A.	Study Director
NCT01162785	Colin P. Dinney, MD	Study Chair
NCT01163084	Christopher Logothetis	Principal Investigator
NCT01163786	Jayesh Mehta, MD	Principal Investigator
NCT01163786	Manu Jain, MD, MS	Principal Investigator
NCT01165112	Ajay Gopal	Principal Investigator
NCT01166139	Robert Spiera, MD	Principal Investigator
NCT01167114	Eunice Kwak, MD, PhD	Principal Investigator
NCT01167192	Rebecca Aft, M.D.	Principal Investigator
NCT01167712	John Chan	Principal Investigator
NCT01167725	Alexander Stojadinovic, MD	Principal Investigator
NCT01168219	Ravi Vij	Principal Investigator
NCT01168232	Carolyn McCourt	Principal Investigator
NCT01168921	William G. Wierda, MD, PHD, BS	Study Chair
NCT01169259	JoAnn E. Manson, MD, DrPH	Principal Investigator
NCT01169259	Julie E. Buring, ScD	Principal Investigator
NCT01169402	Kevin M Watt, MD	Principal Investigator
NCT01169636	Yasuhiro Oki, MD	Principal Investigator
NCT01171092	Sunil Abhyankar, MD	Principal Investigator
NCT01172938	Douglas Hough, MD	Study Director
NCT01173016	Paul Orchard, MD	Principal Investigator
NCT01173523	Leena Gandhi, MD, PhD	Principal Investigator
NCT01173692	Gary B. Gunn, MD	Principal Investigator
NCT01174082	Muzaffar H. Qazilbash, MD	Principal Investigator
NCT01174264	Manish Sharma	Principal Investigator
NCT01174940	Sunil Abhyankar, MD	Principal Investigator
NCT01175109	Deric M Park, MD	Principal Investigator
NCT01175148	Mehdi Hamadani, MD	Principal Investigator
NCT01175980	Patricia LoRusso	Principal Investigator
NCT01176461	Nikhil I. Khushalani, M.D.	Principal Investigator
NCT01176474	Nikhil Khushalani, M.D.	Principal Investigator
NCT01177397	Kristen Hege, M.D.	Study Director
NCT01177683	Sherif Farag, M.B., B.S.	Study Chair
NCT01178281	Robert P Gale, MD, Ph.D.	Study Director
NCT01178814	Mark Heaney, MD	Principal Investigator
NCT01180036	Fernando C. Fervenza, M.D., Ph.D.	Principal Investigator
NCT01180374	Mohini Ranganathan, M.D	Principal Investigator
NCT01180855	Richard R Bootzin, PhD	Principal Investigator
NCT01180959	Ahmed Kaseb, MBBS	Principal Investigator
NCT01181271	Yi-Bin A Chen, MD	Principal Investigator
NCT01182350	Mark W. Kieran, MD, PhD	Study Chair
NCT01182441	David R. Holmes, M.D.	Principal Investigator
NCT01182441	Vivek Y. Reddy, M.D.	Principal Investigator
NCT01183416	Brian Kushner, MD	Principal Investigator
NCT01183429	Brian Kushner, MD	Principal Investigator
NCT01183494	Manish Sharma, MD	Principal Investigator
NCT01183884	Brian Kushner, MD	Principal Investigator
NCT01183897	Brian Kushner, MD	Principal Investigator
NCT01184326	Joaquim Bellmunt, MD, PhD	Principal Investigator
NCT01185067	Scott L Hummel, MD, MS	Principal Investigator
NCT01185366	Amado Zurita, MD	Principal Investigator
NCT01186406	Annick Desjardins, MD, FRCPC	Principal Investigator
NCT01186562	Melena Bellin, MD	Principal Investigator
NCT01187199	Shannon Westin, MD	Principal Investigator
NCT01188421	Eric C. Strain, M.D.	Principal Investigator
NCT01188876	Marcela G. del Carmen, MD, MPH	Principal Investigator
NCT01189266	Jack Su	Principal Investigator
NCT01189370	Peter J Van Veldhuizen, MD	Principal Investigator
NCT01189383	Joseph Fay, MD	Principal Investigator
NCT01190098	Nancy Foldvary-Schaefer, DO	Principal Investigator
NCT01190449	Cara A. Rosenbaum, MD	Principal Investigator
NCT01191697	Peter Enzinger, MD	Principal Investigator
NCT01192555	Chrystal U. Louis, MD	Principal Investigator
NCT01192828	Johan VanHove, MD PhD MBA	Principal Investigator
NCT01193517	Michael Overman, MD	Principal Investigator
NCT01193842	Juan Ramos	Principal Investigator
NCT01194219	Irina Khanskaya, MD	Study Director
NCT01195415	Mark Zalupski	Principal Investigator
NCT01196390	Howard Safran	Principal Investigator
NCT01197170	Filip Janku, MD, PHD	Principal Investigator
NCT01197378	Craig Langman, MD	Principal Investigator
NCT01197560	Oliver Manzke, MD	Study Director
NCT01198028	Bonnie S. Glisson, MD, BS	Principal Investigator
NCT01198067	Sheeba K. Thomas, MD	Principal Investigator
NCT01198145	Robert C. Miller, MD	Study Chair
NCT01198158	George Philips	Principal Investigator
NCT01199146	Charles J Ryan, MD	Principal Investigator
NCT01199263	David Cohn	Principal Investigator
NCT01199575	Danelle F James, MD, MAS	Principal Investigator
NCT01199575	Thomas J Kipps, MD, PhD	Study Director
NCT01199614	John P Bilezikian, MD	Principal Investigator
NCT01200238	F. Stephen Hodi, MD	Principal Investigator
NCT01200329	Yago Nieto, MD, PHD	Principal Investigator
NCT01200355	Genovefa Papanicolaou, MD	Principal Investigator
NCT01202409	Michael Overman, MD	Principal Investigator
NCT01202994	Kevin Duff, Ph.D.	Principal Investigator
NCT01204918	Carlos Zarate, MD	Principal Investigator
NCT01204918	Gerard Sanacora, MD PhD	Principal Investigator
NCT01204918	Maurizio Fava, MD	Principal Investigator
NCT01204918	Sanjay Matthew, MD	Principal Investigator
NCT01206166	Daren K. Heyland, MD	Study Chair
NCT01207050	Anthony Lequerica, PhD	Principal Investigator
NCT01207323	Andrea Pirzkall, M.D.	Study Director
NCT01207492	Andrew J. Wagner, MD, PhD	Principal Investigator
NCT01207908	Meilan Rutter, MD	Principal Investigator
NCT01207921	Todd Fehniger, M.D., Ph.D.	Principal Investigator
NCT01208051	Jonas De Souza	Principal Investigator
NCT01208103	Michael Overman, MD	Principal Investigator
NCT01208389	Albert M Maguire, MD	Principal Investigator
NCT01209325	Joel Palefsky, MD	Principal Investigator
NCT01209442	Douglas Ney, M.D	Principal Investigator
NCT01209598	Mark Dickson, MD	Principal Investigator
NCT01210222	Kathleen Moore	Principal Investigator
NCT01210664	Jeffrey Bluestone, PhD	Study Director
NCT01210664	Kevan Herold, MD	Principal Investigator
NCT01210664	Stephen E Gitelman, MD	Study Chair
NCT01211262	Namir Hassan, PhD	Study Director
NCT01211405	Michael C Mithoefer, MD	Principal Investigator
NCT01211730	Mark E Molitch, M.D.	Principal Investigator
NCT01212757	Douglas Hough, M.D.	Study Director
NCT01212770	Douglas Hough, MD	Study Director
NCT01212822	Barbara Burtness	Principal Investigator
NCT01212900	David A Bluemke, M.D.	Principal Investigator
NCT01212952	Joseph R. Mikhael, M.D.	Principal Investigator
NCT01212952	Martha Lacy, M.D.	Study Chair
NCT01212952	Vivek Roy, M.D.	Principal Investigator
NCT01213082	Susanna S Park, MD PhD	Principal Investigator
NCT01213238	Apostolia M. Tsimberidou, MD, PHD	Principal Investigator
NCT01214083	Gihyun Yoon, MD	Principal Investigator
NCT01214187	Joe GN Garcia, MD	Principal Investigator
NCT01214187	Rosas O Ivan, MD	Principal Investigator
NCT01215136	Matthew Galsky, M.D.	Study Chair
NCT01215253	Wojciech Zareba, MD PhD	Principal Investigator
NCT01215344	Madan Jagasia, MD	Principal Investigator
NCT01216280	Longgui Wang, MD	Study Director
NCT01216982	Daniel T Johnston, MD, MPH	Principal Investigator
NCT01217060	Steven H. Lin, MD, PHD	Principal Investigator
NCT01217385	Bruce J. Tromberg, MD	Principal Investigator
NCT01217437	Adam Levy	Principal Investigator
NCT01217931	Amado Zurita, MD	Principal Investigator
NCT01218048	Rober L Ferris, MD, PhD	Principal Investigator
NCT01218555	Taofeek Owonikoko, PhD/MD	Principal Investigator
NCT01220154	David O'Malley, MD	Principal Investigator
NCT01220609	Linda Duska	Principal Investigator
NCT01220973	Susan Goodin, PhD, FCCP, BCOP	Principal Investigator
NCT01221181	Gerald B Appel, MD	Principal Investigator
NCT01221402	Emmanouil S Brilakis, MD, PhD	Principal Investigator
NCT01221792	Arifulla Khan, MD	Study Director
NCT01222260	Suzanne Lentzsch, MD, PhD	Principal Investigator
NCT01222689	Andrew Ko	Principal Investigator
NCT01222754	Katherine E Warren, M.D.	Principal Investigator
NCT01224067	Gustavo D Kinrys, MD	Principal Investigator
NCT01224730	Ed Cullen, PhD	Study Director
NCT01225055	Thomas J Schnizter, MD, PhD	Principal Investigator
NCT01225887	Don Dizon	Principal Investigator
NCT01227044	Lynn E Sullivan (Fiellin), MD	Principal Investigator
NCT01228175	Kent Hutchison, Ph.D	Principal Investigator
NCT01228318	Igho Ofotokun, MD, MSc	Principal Investigator
NCT01228318	Mervyn N Weitzmann, PhD	Principal Investigator
NCT01229150	Arun Rajan, M.D.	Principal Investigator
NCT01229566	Kevin C Maki, PhD	Principal Investigator
NCT01229761	Roger L Shapiro, MD, MPH	Principal Investigator
NCT01229761	Shahin Lockman, MD, MS	Principal Investigator
NCT01229943	Matthew Kulke	Principal Investigator
NCT01231412	Brenda Sandmaier	Principal Investigator
NCT01232283	Irina Khanskaya, MD	Study Director
NCT01232738	Yunxia Wang, MD	Principal Investigator
NCT01233687	Ahmad Tarhini, MD	Principal Investigator
NCT01233960	Priya Raina	Study Director
NCT01234467	Steven Park, MD	Principal Investigator
NCT01234766	Frederick Lansigan, MD	Principal Investigator
NCT01234935	Richard Finn	Principal Investigator
NCT01236560	Maryam Fouladi	Principal Investigator
NCT01237067	Jung-Min Lee, M.D.	Principal Investigator
NCT01237457	Ebrahim S Delpassand, M.D	Principal Investigator
NCT01237951	Yago Nieto, MD, PhD	Study Chair
NCT01238211	Guido Marcucci	Principal Investigator
NCT01238237	John Boockvar, MD	Principal Investigator
NCT01239342	Eric Jonasch	Principal Investigator
NCT01239394	Jeremy S. Abramson, MD	Principal Investigator
NCT01240304	Issam Makhoul, MD	Principal Investigator
NCT01240590	James Gulley, M.D.	Principal Investigator
NCT01241500	Steven M. Fruchtman, MD	Study Chair
NCT01241734	Tatyana Feldman, MD	Principal Investigator
NCT01242267	Scott D Rowley, MD	Principal Investigator
NCT01243190	William G. Weirda, MD, PhD, BS	Study Chair
NCT01243944	Mark Jones, MD	Study Director
NCT01243944	Srdan Verstovsek, MD,PhD	Study Director
NCT01245101	Rafael E Campo, MD	Principal Investigator
NCT01245673	Aaron Rapoport, M.D.	Study Chair
NCT01245673	Ed Stadtmauer, MD	Principal Investigator
NCT01246622	Elizabeth Griffiths, MD	Principal Investigator
NCT01247246	Israel Rios, MD	Study Director
NCT01248273	Paul Sabbatini, MD	Principal Investigator
NCT01248962	Roisin O'Cearbhaill, MD BCh	Principal Investigator
NCT01249430	Rebecca Klisovic	Principal Investigator
NCT01249443	Missak Haigentz	Principal Investigator
NCT01250925	Christine Sindt, OD	Principal Investigator
NCT01250925	Pedram Hamrah, MD	Principal Investigator
NCT01251861	Anna Ferrari	Principal Investigator
NCT01251874	Bhuvaneswari Ramaswamy	Principal Investigator
NCT01252953	Louise Bowman	Principal Investigator
NCT01252953	Martin Landray	Principal Investigator
NCT01253070	Geoffrey Uy	Principal Investigator
NCT01253161	Jonathan Strosberg, M.D.	Principal Investigator
NCT01253460	William G. Wierda, MD, PHD, BS	Principal Investigator
NCT01253473	Barry J Make, MD	Principal Investigator
NCT01253473	Edwin K Silverman, MD, PhD	Principal Investigator
NCT01253473	James D Crapo, MD	Principal Investigator
NCT01253642	Tomasz Beer	Principal Investigator
NCT01254578	Leslie Andritsos	Principal Investigator
NCT01254617	Erin Bertino	Principal Investigator
NCT01254864	Christopher Logothetis, MD	Principal Investigator
NCT01256268	Robert Wenham, M.D.	Principal Investigator
NCT01256398	Matthew Wieduwilt	Principal Investigator
NCT01257737	Colleen Canavan, BS	Study Chair
NCT01258855	Ahmad Tarhini	Principal Investigator
NCT01258933	William G Wierda, MD	Principal Investigator
NCT01259063	Guido Dalbagni, MD	Principal Investigator
NCT01259089	Melissa Johnson	Principal Investigator
NCT01260688	Sebastien Hotte	Principal Investigator
NCT01261247	Patrick Johnston, M.D.	Study Chair
NCT01261299	Chong-xian Pan, MD, PhD	Study Chair
NCT01262300	Adit A Ginde, MD, MPH	Principal Investigator
NCT01263145	Funda Meric-Bernstam	Principal Investigator
NCT01263769	Christopher Wood, MD	Principal Investigator
NCT01263782	John Heymach, MD, PHD	Principal Investigator
NCT01263938	Ronald G Collman, MD	Principal Investigator
NCT01263951	Marcia Brose, MD, PhD	Principal Investigator
NCT01264432	Nilofer Azad	Principal Investigator
NCT01264705	Adam C Yopp, MD	Principal Investigator
NCT01265433	Marjorie Zauderer, MD	Principal Investigator
NCT01265550	Stuart J Spechler, MD	Study Chair
NCT01265563	Paolo Fanti, MD	Principal Investigator
NCT01266031	Mark R Gilbert, M.D.	Principal Investigator
NCT01266083	Peter Maslak, MD	Principal Investigator
NCT01266317	Michael Donahoe, MD	Principal Investigator
NCT01266603	Wen-Jen Hwu, MD,PHD	Principal Investigator
NCT01267240	Eric Chen	Principal Investigator
NCT01267955	Antoine Italiano	Principal Investigator
NCT01268553	Ronald J Oudiz, MD	Principal Investigator
NCT01269346	Sam Misir	Study Director
NCT01269385	Steven Ansell, M.D.	Study Chair
NCT01270321	Taofeek Owonikoko, MD, PhD	Principal Investigator
NCT01271374	Bobby V Khan, MD, PhD	Principal Investigator
NCT01271374	Keith C Ferdinand, MD	Study Director
NCT01271504	Melissa J Versola, RN	Study Director
NCT01272245	Hagop Kantarjian, MD	Principal Investigator
NCT01272830	Mark W Kovacik, BS	Study Director
NCT01272830	Thomas F Bear, MD	Principal Investigator
NCT01273337	James M Hinson, MD	Study Director
NCT01273610	Arti Hurria, MD	Principal Investigator
NCT01273662	Ann-Lii Cheng, MD, PhD	Principal Investigator
NCT01273805	Brian Wolpin, MD, MPH	Principal Investigator
NCT01274338	Ahmad Tarhini	Principal Investigator
NCT01274429	Wesley Burks, MD	Principal Investigator
NCT01275586	Melissa Markel, MD	Study Chair
NCT01275677	Louis Fehrenbacher	Principal Investigator
NCT01276041	Chau Dang, MD	Principal Investigator
[truncated: 58,788 more rows]

## Sheet: 48314
nct_number	last_name	role
NCT00492778	Jay W. Carlson	Principal Investigator
NCT00565851	Jay W. Carlson	Principal Investigator
NCT00888615	Jay W. Carlson	Principal Investigator
NCT01013649	Jay W. Carlson	Principal Investigator
NCT01042522	Jay W. Carlson	Principal Investigator
NCT01101451	Jay W. Carlson	Principal Investigator
NCT01169337	Jay W. Carlson	Principal Investigator
NCT01272037	Jay W. Carlson	Principal Investigator
NCT01349881	Jay W. Carlson	Principal Investigator
NCT01414608	Jay W. Carlson	Principal Investigator
NCT01415752	Jay W. Carlson	Principal Investigator
NCT01533207	Jay W. Carlson	Principal Investigator
NCT01535053	Jay W. Carlson	Principal Investigator
NCT01622868	Jay W. Carlson	Principal Investigator
NCT01668719	Jay W. Carlson	Principal Investigator
NCT01674140	Jay W. Carlson	Principal Investigator
NCT01809691	Jay W. Carlson	Principal Investigator
NCT01822496	Jay W. Carlson	Principal Investigator
NCT01856192	Jay W. Carlson	Principal Investigator
NCT01863550	Jay W. Carlson	Principal Investigator
NCT01898494	Jay W. Carlson	Principal Investigator
NCT01950390	Jay W. Carlson	Principal Investigator
NCT02101788	Jay W. Carlson	Principal Investigator
NCT02115282	Jay W. Carlson	Principal Investigator
NCT02134912	Jay W. Carlson	Principal Investigator
NCT02135042	Jay W. Carlson	Principal Investigator
NCT02152982	Jay W. Carlson	Principal Investigator
NCT02154490	Jay W. Carlson	Principal Investigator
NCT02177695	Jay W. Carlson	Principal Investigator
NCT02180867	Jay W. Carlson	Principal Investigator
NCT02186847	Jay W. Carlson	Principal Investigator
NCT02193282	Jay W. Carlson	Principal Investigator
NCT02201992	Jay W. Carlson	Principal Investigator
NCT02254278	Jay W. Carlson	Principal Investigator
NCT02306161	Jay W. Carlson	Principal Investigator
NCT02785913	Jay W. Carlson	Principal Investigator
NCT02785939	Jay W. Carlson	Principal Investigator
NCT00565851	James L. Wade	Principal Investigator
NCT00888615	James L. Wade	Principal Investigator
NCT00956007	James L. Wade	Principal Investigator
NCT01013649	James L. Wade	Principal Investigator
NCT01042522	James L. Wade	Principal Investigator
NCT01101451	James L. Wade	Principal Investigator
NCT01169337	James L. Wade	Principal Investigator
NCT01216683	James L. Wade	Principal Investigator
NCT01272037	James L. Wade	Principal Investigator
NCT01349881	James L. Wade	Principal Investigator
NCT01386385	James L. Wade	Principal Investigator
NCT01414608	James L. Wade	Principal Investigator
NCT01415752	James L. Wade	Principal Investigator
NCT01533207	James L. Wade	Principal Investigator
NCT01575548	James L. Wade	Principal Investigator
NCT01668719	James L. Wade	Principal Investigator
NCT01674140	James L. Wade	Principal Investigator
NCT01809691	James L. Wade	Principal Investigator
NCT01822496	James L. Wade	Principal Investigator
NCT01856192	James L. Wade	Principal Investigator
NCT01863550	James L. Wade	Principal Investigator
NCT01935934	James L. Wade	Principal Investigator
NCT01959139	James L. Wade	Principal Investigator
NCT02003222	James L. Wade	Principal Investigator
NCT02085408	James L. Wade	Principal Investigator
NCT02101775	James L. Wade	Principal Investigator
NCT02115282	James L. Wade	Principal Investigator
NCT02135042	James L. Wade	Principal Investigator
NCT02152982	James L. Wade	Principal Investigator
NCT02154490	James L. Wade	Principal Investigator
NCT02186847	James L. Wade	Principal Investigator
NCT02193282	James L. Wade	Principal Investigator
NCT02201992	James L. Wade	Principal Investigator
NCT02785913	James L. Wade	Principal Investigator
NCT02785939	James L. Wade	Principal Investigator
NCT00492778	Benjamin T. Marchello	Principal Investigator
NCT01013649	Benjamin T. Marchello	Principal Investigator
NCT01169337	Benjamin T. Marchello	Principal Investigator
NCT01236547	Benjamin T. Marchello	Principal Investigator
NCT01272037	Benjamin T. Marchello	Principal Investigator
NCT01349881	Benjamin T. Marchello	Principal Investigator
NCT01414608	Benjamin T. Marchello	Principal Investigator
NCT01415752	Benjamin T. Marchello	Principal Investigator
NCT01533207	Benjamin T. Marchello	Principal Investigator
NCT01535053	Benjamin T. Marchello	Principal Investigator
NCT01575548	Benjamin T. Marchello	Principal Investigator
NCT01674140	Benjamin T. Marchello	Principal Investigator
NCT01809691	Benjamin T. Marchello	Principal Investigator
NCT01856192	Benjamin T. Marchello	Principal Investigator
NCT01863550	Benjamin T. Marchello	Principal Investigator
NCT01950390	Benjamin T. Marchello	Principal Investigator
NCT02003222	Benjamin T. Marchello	Principal Investigator
NCT02085408	Benjamin T. Marchello	Principal Investigator
NCT02115282	Benjamin T. Marchello	Principal Investigator
NCT02134912	Benjamin T. Marchello	Principal Investigator
NCT02152982	Benjamin T. Marchello	Principal Investigator
NCT02154490	Benjamin T. Marchello	Principal Investigator
NCT02177695	Benjamin T. Marchello	Principal Investigator
NCT02179086	Benjamin T. Marchello	Principal Investigator
NCT02186847	Benjamin T. Marchello	Principal Investigator
NCT02193282	Benjamin T. Marchello	Principal Investigator
NCT02201992	Benjamin T. Marchello	Principal Investigator
NCT02254278	Benjamin T. Marchello	Principal Investigator
NCT02785913	Benjamin T. Marchello	Principal Investigator
NCT02785939	Benjamin T. Marchello	Principal Investigator
NCT00492778	John P. Kuebler	Principal Investigator
NCT00565851	John P. Kuebler	Principal Investigator
NCT00888615	John P. Kuebler	Principal Investigator
NCT01013649	John P. Kuebler	Principal Investigator
NCT01042522	John P. Kuebler	Principal Investigator
NCT01101451	John P. Kuebler	Principal Investigator
NCT01169337	John P. Kuebler	Principal Investigator
NCT01272037	John P. Kuebler	Principal Investigator
NCT01349881	John P. Kuebler	Principal Investigator
NCT01414608	John P. Kuebler	Principal Investigator
NCT01533207	John P. Kuebler	Principal Investigator
NCT01535053	John P. Kuebler	Principal Investigator
NCT01575548	John P. Kuebler	Principal Investigator
NCT01668719	John P. Kuebler	Principal Investigator
NCT01674140	John P. Kuebler	Principal Investigator
NCT01809691	John P. Kuebler	Principal Investigator
NCT01822496	John P. Kuebler	Principal Investigator
NCT01856192	John P. Kuebler	Principal Investigator
NCT01863550	John P. Kuebler	Principal Investigator
NCT01950390	John P. Kuebler	Principal Investigator
NCT02115282	John P. Kuebler	Principal Investigator
NCT02134912	John P. Kuebler	Principal Investigator
NCT02152982	John P. Kuebler	Principal Investigator
NCT02179086	John P. Kuebler	Principal Investigator
NCT02186847	John P. Kuebler	Principal Investigator
NCT02193282	John P. Kuebler	Principal Investigator
NCT02201992	John P. Kuebler	Principal Investigator
NCT02785913	John P. Kuebler	Principal Investigator
NCT02785939	John P. Kuebler	Principal Investigator
NCT00492778	Shaker R. Dakhil	Principal Investigator
NCT00565851	Keren Sturtz	Principal Investigator
NCT00565851	Shaker R. Dakhil	Principal Investigator
NCT00888615	Shaker R. Dakhil	Principal Investigator
NCT00956007	Keren Sturtz	Principal Investigator
NCT01013649	Shaker R. Dakhil	Principal Investigator
NCT01101451	Keren Sturtz	Principal Investigator
NCT01169337	Keren Sturtz	Principal Investigator
NCT01169337	Shaker R. Dakhil	Principal Investigator
NCT01216683	Keren Sturtz	Principal Investigator
NCT01216683	Shaker R. Dakhil	Principal Investigator
NCT01272037	Keren Sturtz	Principal Investigator
NCT01272037	Shaker R. Dakhil	Principal Investigator
NCT01349881	Keren Sturtz	Principal Investigator
NCT01349881	Shaker R. Dakhil	Principal Investigator
NCT01414608	Keren Sturtz	Principal Investigator
NCT01415752	Keren Sturtz	Principal Investigator
NCT01415752	Shaker R. Dakhil	Principal Investigator
NCT01533207	Keren Sturtz	Principal Investigator
NCT01533207	Shaker R. Dakhil	Principal Investigator
NCT01575548	Shaker R. Dakhil	Principal Investigator
NCT01668719	Shaker R. Dakhil	Principal Investigator
NCT01674140	Keren Sturtz	Principal Investigator
NCT01674140	Shaker R. Dakhil	Principal Investigator
NCT01809691	Keren Sturtz	Principal Investigator
NCT01809691	Shaker R. Dakhil	Principal Investigator
NCT01822496	Keren Sturtz	Principal Investigator
NCT01856192	Keren Sturtz	Principal Investigator
NCT01856192	Shaker R. Dakhil	Principal Investigator
NCT01863550	Keren Sturtz	Principal Investigator
NCT01863550	Shaker R. Dakhil	Principal Investigator
NCT01898494	Keren Sturtz	Principal Investigator
NCT01950390	Shaker R. Dakhil	Principal Investigator
NCT02003222	Shaker R. Dakhil	Principal Investigator
NCT02085408	Keren Sturtz	Principal Investigator
NCT02101788	Keren Sturtz	Principal Investigator
NCT02115282	Keren Sturtz	Principal Investigator
NCT02115282	Shaker R. Dakhil	Principal Investigator
NCT02135042	Keren Sturtz	Principal Investigator
NCT02135042	Shaker R. Dakhil	Principal Investigator
NCT02152982	Keren Sturtz	Principal Investigator
NCT02152982	Shaker R. Dakhil	Principal Investigator
NCT02154490	Keren Sturtz	Principal Investigator
NCT02154490	Shaker R. Dakhil	Principal Investigator
NCT02186847	Keren Sturtz	Principal Investigator
NCT02186847	Shaker R. Dakhil	Principal Investigator
NCT02193282	Keren Sturtz	Principal Investigator
NCT02193282	Shaker R. Dakhil	Principal Investigator
NCT02201992	Keren Sturtz	Principal Investigator
NCT02201992	Shaker R. Dakhil	Principal Investigator
NCT02254278	Keren Sturtz	Principal Investigator
NCT02254278	Shaker R. Dakhil	Principal Investigator
NCT02785913	Keren Sturtz	Principal Investigator
NCT02785913	Shaker R. Dakhil	Principal Investigator
NCT02785939	Keren Sturtz	Principal Investigator
NCT02785939	Shaker R. Dakhil	Principal Investigator
NCT00492778	Donald B. Wender	Principal Investigator
NCT00956007	Donald B. Wender	Principal Investigator
NCT01013649	Donald B. Wender	Principal Investigator
NCT01101451	Donald B. Wender	Principal Investigator
NCT01169337	Donald B. Wender	Principal Investigator
NCT01216683	Donald B. Wender	Principal Investigator
NCT01272037	Donald B. Wender	Principal Investigator
NCT01349881	Donald B. Wender	Principal Investigator
NCT01415752	Donald B. Wender	Principal Investigator
NCT01533207	Donald B. Wender	Principal Investigator
NCT01535053	Donald B. Wender	Principal Investigator
NCT01668719	Donald B. Wender	Principal Investigator
NCT01674140	Donald B. Wender	Principal Investigator
NCT01822496	Donald B. Wender	Principal Investigator
NCT01856192	Donald B. Wender	Principal Investigator
NCT01863550	Donald B. Wender	Principal Investigator
NCT01950390	Donald B. Wender	Principal Investigator
NCT02085408	Donald B. Wender	Principal Investigator
NCT02115282	Donald B. Wender	Principal Investigator
NCT02152982	Donald B. Wender	Principal Investigator
NCT02177695	Donald B. Wender	Principal Investigator
NCT02180867	Donald B. Wender	Principal Investigator
NCT02193282	Donald B. Wender	Principal Investigator
NCT02201992	Donald B. Wender	Principal Investigator
NCT02785913	Donald B. Wender	Principal Investigator
NCT02785939	Donald B. Wender	Principal Investigator
NCT00565851	Howard M. Gross	Principal Investigator
NCT01101451	Howard M. Gross	Principal Investigator
NCT01169337	Howard M. Gross	Principal Investigator
NCT01272037	Howard M. Gross	Principal Investigator
NCT01349881	Howard M. Gross	Principal Investigator
NCT01414608	Howard M. Gross	Principal Investigator
NCT01415752	Howard M. Gross	Principal Investigator
NCT01533207	Howard M. Gross	Principal Investigator
NCT01575548	Howard M. Gross	Principal Investigator
NCT01668719	Howard M. Gross	Principal Investigator
NCT01674140	Howard M. Gross	Principal Investigator
NCT01809691	Howard M. Gross	Principal Investigator
NCT01863550	Howard M. Gross	Principal Investigator
NCT01950390	Howard M. Gross	Principal Investigator
NCT02003222	Howard M. Gross	Principal Investigator
NCT02085408	Howard M. Gross	Principal Investigator
NCT02134912	Howard M. Gross	Principal Investigator
NCT02152982	Howard M. Gross	Principal Investigator
NCT02154490	Howard M. Gross	Principal Investigator
NCT02186847	Howard M. Gross	Principal Investigator
NCT02193282	Howard M. Gross	Principal Investigator
NCT02201992	Howard M. Gross	Principal Investigator
NCT02785913	Howard M. Gross	Principal Investigator
NCT02785939	Howard M. Gross	Principal Investigator
NCT00492778	John A. Ellerton	Principal Investigator
NCT00565851	Kathleen J. Yost	Principal Investigator
NCT00565851	Mehmet S. Copur	Principal Investigator
NCT00602797	Mehmet S. Copur	Principal Investigator
NCT01013649	John A. Ellerton	Principal Investigator
NCT01013649	Kathleen J. Yost	Principal Investigator
NCT01013649	Mehmet S. Copur	Principal Investigator
NCT01106898	Mehmet S. Copur	Principal Investigator
NCT01169337	John A. Ellerton	Principal Investigator
NCT01169337	Kathleen J. Yost	Principal Investigator
NCT01272037	John A. Ellerton	Principal Investigator
NCT01272037	Kathleen J. Yost	Principal Investigator
NCT01272037	Mehmet S. Copur	Principal Investigator
NCT01349881	John A. Ellerton	Principal Investigator
NCT01349881	Kathleen J. Yost	Principal Investigator
NCT01349881	Mehmet S. Copur	Principal Investigator
NCT01414608	Kathleen J. Yost	Principal Investigator
NCT01533207	Mehmet S. Copur	Principal Investigator
NCT01535053	Kathleen J. Yost	Principal Investigator
NCT01575548	John A. Ellerton	Principal Investigator
NCT01575548	Kathleen J. Yost	Principal Investigator
NCT01575548	Mehmet S. Copur	Principal Investigator
NCT01622868	Kathleen J. Yost	Principal Investigator
NCT01668719	John A. Ellerton	Principal Investigator
NCT01668719	Kathleen J. Yost	Principal Investigator
NCT01674140	John A. Ellerton	Principal Investigator
NCT01674140	Mehmet S. Copur	Principal Investigator
NCT01809691	John A. Ellerton	Principal Investigator
NCT01809691	Mehmet S. Copur	Principal Investigator
NCT01822496	Kathleen J. Yost	Principal Investigator
NCT01856192	John A. Ellerton	Principal Investigator
NCT01856192	Mehmet S. Copur	Principal Investigator
NCT01863550	John A. Ellerton	Principal Investigator
NCT01863550	Mehmet S. Copur	Principal Investigator
NCT01950390	John A. Ellerton	Principal Investigator
NCT01950390	Kathleen J. Yost	Principal Investigator
NCT02003222	John A. Ellerton	Principal Investigator
NCT02003222	Kathleen J. Yost	Principal Investigator
NCT02085408	John A. Ellerton	Principal Investigator
NCT02101788	Kathleen J. Yost	Principal Investigator
NCT02101788	Mehmet S. Copur	Principal Investigator
NCT02101853	Kathleen J. Yost	Principal Investigator
NCT02112916	Kathleen J. Yost	Principal Investigator
NCT02115282	Kathleen J. Yost	Principal Investigator
NCT02115282	Mehmet S. Copur	Principal Investigator
NCT02135042	John A. Ellerton	Principal Investigator
NCT02152982	Kathleen J. Yost	Principal Investigator
NCT02152982	Mehmet S. Copur	Principal Investigator
NCT02154490	John A. Ellerton	Principal Investigator
NCT02154490	Mehmet S. Copur	Principal Investigator
NCT02177695	John A. Ellerton	Principal Investigator
NCT02179086	John A. Ellerton	Principal Investigator
NCT02179086	Kathleen J. Yost	Principal Investigator
NCT02180867	Kathleen J. Yost	Principal Investigator
NCT02186847	Mehmet S. Copur	Principal Investigator
NCT02193282	John A. Ellerton	Principal Investigator
NCT02193282	Kathleen J. Yost	Principal Investigator
NCT02193282	Mehmet S. Copur	Principal Investigator
NCT02201992	John A. Ellerton	Principal Investigator
NCT02201992	Mehmet S. Copur	Principal Investigator
NCT02254278	John A. Ellerton	Principal Investigator
NCT02254278	Kathleen J. Yost	Principal Investigator
NCT02254278	Mehmet S. Copur	Principal Investigator
NCT02306161	Kathleen J. Yost	Principal Investigator
NCT02306161	Mehmet S. Copur	Principal Investigator
NCT02785913	John A. Ellerton	Principal Investigator
NCT02785913	Mehmet S. Copur	Principal Investigator
NCT02785939	John A. Ellerton	Principal Investigator
NCT02785939	Mehmet S. Copur	Principal Investigator
NCT00094705	Anna Durbin, MD	Principal Investigator
NCT00094718	Anna Durbin, MD	Principal Investigator
NCT00118924	Anna Durbin, MD	Principal Investigator
NCT00258193	Michael Camilleri, MD	Principal Investigator
NCT00270699	Anna Durbin, MD	Principal Investigator
NCT00320658	Anna Durbin, MD	Principal Investigator
NCT00322946	Anna Durbin, MD	Principal Investigator
NCT00375726	Anna Durbin, MD	Principal Investigator
NCT00458120	Anna Durbin, MD	Principal Investigator
NCT00473135	Anna Durbin, MD	Principal Investigator
NCT00712803	Anna Durbin, MD	Principal Investigator
NCT00831012	Anna Durbin, MD	Study Chair
NCT00871325	Michael Camilleri, MD	Principal Investigator
NCT00888615	Joseph J. Merchant	Principal Investigator
NCT00919178	Anna Durbin, MD	Principal Investigator
NCT00920517	Anna Durbin, MD	Principal Investigator
NCT00953043	Michael Camilleri, MD	Principal Investigator
NCT00956007	Joseph J. Merchant	Principal Investigator
NCT01038687	Michael Camilleri, MD	Principal Investigator
NCT01055704	Michael Camilleri, MD	Principal Investigator
NCT01056107	Michael Camilleri, MD	Principal Investigator
NCT01072786	Anna Durbin, MD	Principal Investigator
NCT01084291	Anna Durbin, MD	Principal Investigator
NCT01094808	Michael Camilleri, MD	Principal Investigator
NCT01094821	Michael Camilleri, MD	Principal Investigator
NCT01101451	Joseph J. Merchant	Principal Investigator
NCT01139216	Michael Camilleri, MD	Principal Investigator
NCT01216683	Joseph J. Merchant	Principal Investigator
NCT01253408	Michael Camilleri, MD	Principal Investigator
NCT01272037	Joseph J. Merchant	Principal Investigator
NCT01331213	Michael Camilleri, MD	Principal Investigator
NCT01394055	Michael Camilleri, MD	Principal Investigator
NCT01415752	Joseph J. Merchant	Principal Investigator
NCT01436422	Anna Durbin, MD	Principal Investigator
NCT01500317	Michael Camilleri, MD	Principal Investigator
NCT01506570	Anna Durbin, MD	Principal Investigator
NCT01523184	Michael Camilleri, MD	Principal Investigator
NCT01533207	Joseph J. Merchant	Principal Investigator
NCT01575548	Joseph J. Merchant	Principal Investigator
NCT01668719	Joseph J. Merchant	Principal Investigator
NCT01674140	Joseph J. Merchant	Principal Investigator
NCT01782300	Anna Durbin, MD	Principal Investigator
NCT01786109	Michael Camilleri, MD	Principal Investigator
NCT01809691	Joseph J. Merchant	Principal Investigator
NCT01822496	Joseph J. Merchant	Principal Investigator
NCT01834404	Michael Camilleri, MD	Principal Investigator
NCT01856192	Joseph J. Merchant	Principal Investigator
NCT01863550	Joseph J. Merchant	Principal Investigator
NCT01890837	Michael Camilleri, MD	Principal Investigator
NCT01931176	Anna Durbin, MD	Principal Investigator
NCT01950390	Joseph J. Merchant	Principal Investigator
NCT02003222	Joseph J. Merchant	Principal Investigator
NCT02021968	Anna Durbin, MD	Principal Investigator
NCT02033876	Michael Camilleri, MD	Principal Investigator
NCT02085408	Joseph J. Merchant	Principal Investigator
NCT02099084	Michael Camilleri, MD	Principal Investigator
NCT02111603	Michael Camilleri, MD	Principal Investigator
NCT02115282	Joseph J. Merchant	Principal Investigator
NCT02137642	Michael Camilleri, MD	Principal Investigator
NCT02160990	Michael Camilleri, MD	Principal Investigator
NCT02186626	Anna Durbin, MD	Principal Investigator
NCT02193282	Joseph J. Merchant	Principal Investigator
NCT02201992	Joseph J. Merchant	Principal Investigator
NCT02317900	Anna Durbin, MD	Principal Investigator
NCT02785913	Joseph J. Merchant	Principal Investigator
NCT02785939	Joseph J. Merchant	Principal Investigator
NCT00492778	James N. Atkins	Principal Investigator
NCT01101451	James N. Atkins	Principal Investigator
NCT01169337	James N. Atkins	Principal Investigator
NCT01272037	James N. Atkins	Principal Investigator
NCT01349881	James N. Atkins	Principal Investigator
NCT01415752	James N. Atkins	Principal Investigator
NCT01575548	James N. Atkins	Principal Investigator
NCT01668719	James N. Atkins	Principal Investigator
NCT01674140	James N. Atkins	Principal Investigator
NCT01856192	James N. Atkins	Principal Investigator
NCT01863550	James N. Atkins	Principal Investigator
NCT01950390	James N. Atkins	Principal Investigator
NCT01959139	James N. Atkins	Principal Investigator
NCT02101788	James N. Atkins	Principal Investigator
NCT02115282	James N. Atkins	Principal Investigator
NCT02154490	James N. Atkins	Principal Investigator
NCT02177695	James N. Atkins	Principal Investigator
NCT02193282	James N. Atkins	Principal Investigator
NCT02201992	James N. Atkins	Principal Investigator
NCT02785913	James N. Atkins	Principal Investigator
NCT02785939	James N. Atkins	Principal Investigator
NCT00565851	Robert J. Behrens	Principal Investigator
NCT00647608	James D Carlson, Pharm. D.	Principal Investigator
NCT00647621	James D Carlson, Pharm. D.	Principal Investigator
NCT00647660	James D Carlson, Pharm. D.	Principal Investigator
NCT00647673	James D Carlson, Pharm. D.	Principal Investigator
NCT00647686	Dorian Williams, M.D.	Principal Investigator
NCT00647816	James D Carlson, Pharm. D.	Principal Investigator
NCT00647842	Dorian Williams, M.D.	Principal Investigator
NCT00647881	James D Carlson, Pharm. D.	Principal Investigator
NCT00647894	Dorian Williams, M.D.	Principal Investigator
NCT00647959	Dorian Williams, M.D.	Principal Investigator
NCT00648050	James D Carlson, Pharm. D.	Principal Investigator
NCT00648180	Dorian Williams, M.D.	Principal Investigator
NCT00648219	James D Carlson, Pharm. D.	Principal Investigator
NCT00648297	James D Carlson, Pharm. D.	Principal Investigator
NCT00648401	James D Carlson, Pharm. D.	Principal Investigator
NCT00648505	James D Carlson, Pharm. D.	Principal Investigator
NCT00648700	James D Carlson, Pharm. D.	Principal Investigator
NCT00648804	Dorian Williams, M.D.	Principal Investigator
NCT00648934	Dorian Williams, M.D.	Principal Investigator
NCT00649155	Dorian Williams, M.D.	Principal Investigator
NCT00649324	James D Carlson, Pharm. D.	Principal Investigator
NCT00649363	Dorian Williams, M.D.	Principal Investigator
NCT00649454	James D Carlson, Pharm. D.	Principal Investigator
NCT00649467	Dorian Williams, M.D.	Principal Investigator
NCT00649571	Dorian Williams, M.D.	Principal Investigator
NCT00649623	James D Carlson, Pharm. D.	Principal Investigator
NCT00649636	James D Carlson, Pharm. D.	Principal Investigator
NCT00649662	Dorian Williams, M.D.	Principal Investigator
NCT00649740	Dorian Williams, M.D.	Principal Investigator
NCT00649805	James D Carlson, Pharm. D.	Principal Investigator
NCT00649870	Dorian Williams, M.D.	Principal Investigator
NCT00649935	Dorian Williams, M.D.	Principal Investigator
NCT00649974	Dorian Williams, M.D.	Principal Investigator
NCT00650117	Dorian Williams, M.D.	Principal Investigator
NCT00650273	Dorian Williams, M.D.	Principal Investigator
NCT00650351	Dorian Williams, M.D.	Principal Investigator
NCT00650494	Dorian Williams, M.D.	Principal Investigator
NCT00830206	James D Carlson, Pharm. D.	Principal Investigator
NCT00830336	James D Carlson, Pharm. D.	Principal Investigator
NCT00956007	Robert J. Behrens	Principal Investigator
NCT00974012	James D Carlson, Pharm. D.	Principal Investigator
NCT01013649	Kurt Oettel	Principal Investigator
NCT01013649	Robert J. Behrens	Principal Investigator
NCT01101451	Kurt Oettel	Principal Investigator
NCT01101451	Robert J. Behrens	Principal Investigator
NCT01169337	Kurt Oettel	Principal Investigator
NCT01216683	Kurt Oettel	Principal Investigator
NCT01272037	Kurt Oettel	Principal Investigator
NCT01272037	Robert J. Behrens	Principal Investigator
NCT01349881	Robert J. Behrens	Principal Investigator
NCT01415752	Kurt Oettel	Principal Investigator
NCT01533207	Kurt Oettel	Principal Investigator
NCT01533207	Robert J. Behrens	Principal Investigator
NCT01575548	Kurt Oettel	Principal Investigator
NCT01668719	Kurt Oettel	Principal Investigator
NCT01674140	Robert J. Behrens	Principal Investigator
NCT01809691	Kurt Oettel	Principal Investigator
NCT01856192	Kurt Oettel	Principal Investigator
NCT01856192	Robert J. Behrens	Principal Investigator
NCT01863550	Kurt Oettel	Principal Investigator
NCT01950390	Kurt Oettel	Principal Investigator
NCT01950390	Robert J. Behrens	Principal Investigator
NCT02003222	Kurt Oettel	Principal Investigator
NCT02085408	Kurt Oettel	Principal Investigator
NCT02101788	Robert J. Behrens	Principal Investigator
NCT02115282	Kurt Oettel	Principal Investigator
NCT02115282	Robert J. Behrens	Principal Investigator
NCT02135042	Robert J. Behrens	Principal Investigator
NCT02152982	Robert J. Behrens	Principal Investigator
NCT02154490	Kurt Oettel	Principal Investigator
NCT02154490	Robert J. Behrens	Principal Investigator
NCT02179086	Robert J. Behrens	Principal Investigator
NCT02193282	Robert J. Behrens	Principal Investigator
NCT02201992	Kurt Oettel	Principal Investigator
NCT02201992	Robert J. Behrens	Principal Investigator
NCT02785913	Kurt Oettel	Principal Investigator
NCT02785913	Robert J. Behrens	Principal Investigator
NCT02785939	Kurt Oettel	Principal Investigator
NCT02785939	Robert J. Behrens	Principal Investigator
NCT00436527	Ronald W Gottschalk, MD	Study Director
NCT00437255	Ronald W Gottschalk, MD	Study Director
NCT00469183	Ronald W Gottschalk, MD	Study Director
NCT00469755	Ronald W Gottschalk, MD	Study Director
NCT00472966	Ronald W Gottschalk, MD	Study Director
NCT00647556	Ronald W Gottschalk, MD	Study Director
NCT00658788	Ronald W Gottschalk, MD	Study Director
NCT00733954	Ronald W Gottschalk, MD	Study Director
NCT00881868	Ronald W Gottschalk, MD	Study Director
NCT00892281	Ronald W Gottschalk, MD	Study Director
NCT00907101	Ronald W Gottschalk, MD	Study Director
NCT00988637	Ronald W Gottschalk, MD	Study Director
NCT01046396	Ronald W Gottschalk, MD	Study Director
NCT01046565	Ronald W Gottschalk, MD	Study Director
NCT01139008	Ronald W Gottschalk, MD	Study Director
NCT01139047	Ronald W Gottschalk, MD	Study Director
NCT01169337	Jeffrey K. Giguere	Principal Investigator
NCT01209949	Ronald W Gottschalk, MD	Study Director
NCT01272037	Jeffrey K. Giguere	Principal Investigator
NCT01308619	Ronald W Gottschalk, MD	Study Director
NCT01349881	Jeffrey K. Giguere	Principal Investigator
NCT01426269	Ronald W Gottschalk, MD	Study Director
NCT01674140	Jeffrey K. Giguere	Principal Investigator
NCT01809691	Jeffrey K. Giguere	Principal Investigator
NCT01856192	Jeffrey K. Giguere	Principal Investigator
NCT01863550	Jeffrey K. Giguere	Principal Investigator
NCT01950390	Jeffrey K. Giguere	Principal Investigator
NCT02003222	Jeffrey K. Giguere	Principal Investigator
NCT02115282	Jeffrey K. Giguere	Principal Investigator
NCT02135042	Jeffrey K. Giguere	Principal Investigator
NCT02152982	Jeffrey K. Giguere	Principal Investigator
NCT02154490	Jeffrey K. Giguere	Principal Investigator
NCT02177695	Jeffrey K. Giguere	Principal Investigator
NCT02186847	Jeffrey K. Giguere	Principal Investigator
NCT02193282	Jeffrey K. Giguere	Principal Investigator
NCT02201992	Jeffrey K. Giguere	Principal Investigator
NCT02785913	Jeffrey K. Giguere	Principal Investigator
NCT02785939	Jeffrey K. Giguere	Principal Investigator
NCT00129740	Jorge Cortes, MD	Principal Investigator
NCT00254423	Jorge Cortes, MD	Principal Investigator
NCT00375219	Jorge Cortes, MD	Principal Investigator
NCT00462943	Jorge Cortes, MD	Principal Investigator
NCT00492778	Thomas J. Reid	Principal Investigator
NCT00520208	Jorge Cortes, MD	Principal Investigator
NCT00827138	Jorge Cortes, MD	Principal Investigator
NCT00888615	Thomas J. Reid	Principal Investigator
NCT00904995	Jorge Cortes, MD	Study Chair
NCT00936117	Jorge Cortes, MD	Study Chair
NCT00954941	Jorge Cortes, MD	Study Chair
NCT00980460	Jeffrey S. Dome	Principal Investigator
NCT00980460	Mark A. Ranalli	Principal Investigator
NCT00980460	Robert J. Fallon	Principal Investigator
NCT01031498	Jorge Cortes, MD	Study Chair
NCT01096368	Jeffrey S. Dome	Principal Investigator
NCT01096368	Mark A. Ranalli	Principal Investigator
NCT01096368	Robert J. Fallon	Principal Investigator
NCT01101451	Thomas J. Reid	Principal Investigator
NCT01159028	Jorge Cortes, MD	Study Chair
NCT01167166	Jorge Cortes, MD	Principal Investigator
NCT01169337	Gregory A. Masters	Principal Investigator
NCT01169337	Thomas J. Reid	Principal Investigator
NCT01190930	Jeffrey S. Dome	Principal Investigator
NCT01190930	Mark A. Ranalli	Principal Investigator
NCT01190930	Robert J. Fallon	Principal Investigator
NCT01202877	Jorge Cortes, MD	Principal Investigator
NCT01216683	Gregory A. Masters	Principal Investigator
NCT01272037	Gregory A. Masters	Principal Investigator
NCT01272037	Thomas J. Reid	Principal Investigator
NCT01307579	Jeffrey S. Dome	Principal Investigator
NCT01307579	Mark A. Ranalli	Principal Investigator
NCT01307579	Robert J. Fallon	Principal Investigator
NCT01349881	Thomas J. Reid	Principal Investigator
NCT01371656	Jeffrey S. Dome	Principal Investigator
NCT01371656	Mark A. Ranalli	Principal Investigator
NCT01371656	Robert J. Fallon	Principal Investigator
NCT01371981	Jeffrey S. Dome	Principal Investigator
NCT01371981	Mark A. Ranalli	Principal Investigator
NCT01371981	Robert J. Fallon	Principal Investigator
NCT01415752	Gregory A. Masters	Principal Investigator
NCT01460498	Jorge Cortes, MD	Principal Investigator
NCT01503515	Mark A. Ranalli	Principal Investigator
NCT01503515	Robert J. Fallon	Principal Investigator
NCT01503632	Jeffrey S. Dome	Principal Investigator
NCT01503632	Mark A. Ranalli	Principal Investigator
NCT01503632	Robert J. Fallon	Principal Investigator
NCT01533207	Thomas J. Reid	Principal Investigator
NCT01575548	Gregory A. Masters	Principal Investigator
NCT01575548	Thomas J. Reid	Principal Investigator
NCT01602666	Jeffrey S. Dome	Principal Investigator
NCT01602666	Mark A. Ranalli	Principal Investigator
NCT01602666	Robert J. Fallon	Principal Investigator
NCT01606579	Jorge Cortes, MD	Principal Investigator
NCT01636609	Jorge Cortes, MD	Principal Investigator
NCT01664897	Jorge Cortes, MD	Principal Investigator
NCT01668719	Gregory A. Masters	Principal Investigator
NCT01674140	Thomas J. Reid	Principal Investigator
NCT01746836	Jorge Cortes, MD	Principal Investigator
NCT01767194	Jeffrey S. Dome	Principal Investigator
NCT01767194	Mark A. Ranalli	Principal Investigator
NCT01767194	Robert J. Fallon	Principal Investigator
NCT01809691	Thomas J. Reid	Principal Investigator
NCT01856192	Gregory A. Masters	Principal Investigator
NCT01863550	Gregory A. Masters	Principal Investigator
NCT01863550	Thomas J. Reid	Principal Investigator
NCT01950390	Gregory A. Masters	Principal Investigator
NCT01979536	Jeffrey S. Dome	Principal Investigator
NCT01979536	Mark A. Ranalli	Principal Investigator
NCT01979536	Robert J. Fallon	Principal Investigator
NCT02017964	Jeffrey S. Dome	Principal Investigator
NCT02017964	Mark A. Ranalli	Principal Investigator
NCT02017964	Robert J. Fallon	Principal Investigator
NCT02101788	Thomas J. Reid	Principal Investigator
NCT02101853	Jeffrey S. Dome	Principal Investigator
NCT02101853	Mark A. Ranalli	Principal Investigator
NCT02101853	Robert J. Fallon	Principal Investigator
NCT02112916	Jeffrey S. Dome	Principal Investigator
NCT02112916	Mark A. Ranalli	Principal Investigator
NCT02112916	Robert J. Fallon	Principal Investigator
NCT02115282	Gregory A. Masters	Principal Investigator
NCT02116777	Jeffrey S. Dome	Principal Investigator
NCT02135042	Gregory A. Masters	Principal Investigator
NCT02152982	Thomas J. Reid	Principal Investigator
NCT02154490	Gregory A. Masters	Principal Investigator
NCT02154490	Thomas J. Reid	Principal Investigator
NCT02176967	Jeffrey S. Dome	Principal Investigator
NCT02176967	Mark A. Ranalli	Principal Investigator
NCT02176967	Robert J. Fallon	Principal Investigator
NCT02180867	Jeffrey S. Dome	Principal Investigator
NCT02180867	Mark A. Ranalli	Principal Investigator
NCT02180867	Robert J. Fallon	Principal Investigator
NCT02186847	Gregory A. Masters	Principal Investigator
NCT02193282	Gregory A. Masters	Principal Investigator
NCT02193282	Thomas J. Reid	Principal Investigator
NCT02201992	Gregory A. Masters	Principal Investigator
NCT02201992	Thomas J. Reid	Principal Investigator
NCT02254278	Gregory A. Masters	Principal Investigator
NCT02306161	Jeffrey S. Dome	Principal Investigator
NCT02306161	Mark A. Ranalli	Principal Investigator
NCT02306161	Robert J. Fallon	Principal Investigator
NCT02785913	Gregory A. Masters	Principal Investigator
NCT02785913	Thomas J. Reid	Principal Investigator
NCT02785939	Gregory A. Masters	Principal Investigator
NCT02785939	Thomas J. Reid	Principal Investigator
NCT02883049	Jeffrey S. Dome	Principal Investigator
NCT02883049	Mark A. Ranalli	Principal Investigator
NCT02883049	Robert J. Fallon	Principal Investigator
NCT00392327	Steven L. Halpern	Principal Investigator
NCT00492778	Sharad A. Ghamande	Principal Investigator
NCT00565851	Sharad A. Ghamande	Principal Investigator
NCT00956007	Peter R. Watson	Principal Investigator
NCT00980460	Gregory A. Hale	Principal Investigator
NCT00980460	Rene Y. McNall-Knapp	Principal Investigator
NCT00980460	Steven J. Kuerbitz	Principal Investigator
NCT00980460	Steven L. Halpern	Principal Investigator
NCT01013649	Peter R. Watson	Principal Investigator
NCT01042522	Sharad A. Ghamande	Principal Investigator
NCT01096368	Gregory A. Hale	Principal Investigator
NCT01096368	Rene Y. McNall-Knapp	Principal Investigator
NCT01096368	Steven J. Kuerbitz	Principal Investigator
NCT01096368	Steven L. Halpern	Principal Investigator
NCT01169337	Bret E. Friday	Principal Investigator
NCT01169337	Peter R. Watson	Principal Investigator
NCT01169337	Sharad A. Ghamande	Principal Investigator
NCT01169337	Thomas H. Openshaw	Principal Investigator
NCT01190930	Gregory A. Hale	Principal Investigator
NCT01190930	Rene Y. McNall-Knapp	Principal Investigator
NCT01190930	Steven J. Kuerbitz	Principal Investigator
NCT01190930	Steven L. Halpern	Principal Investigator
NCT01216683	Bret E. Friday	Principal Investigator
NCT01216683	Sharad A. Ghamande	Principal Investigator
NCT01272037	Sharad A. Ghamande	Principal Investigator
NCT01272037	Thomas H. Openshaw	Principal Investigator
NCT01307579	Gregory A. Hale	Principal Investigator
NCT01307579	Rene Y. McNall-Knapp	Principal Investigator
NCT01307579	Steven J. Kuerbitz	Principal Investigator
NCT01307579	Steven L. Halpern	Principal Investigator
NCT01349881	Bret E. Friday	Principal Investigator
NCT01371656	Gregory A. Hale	Principal Investigator
NCT01371656	Rene Y. McNall-Knapp	Principal Investigator
NCT01371656	Steven J. Kuerbitz	Principal Investigator
NCT01371981	Gregory A. Hale	Principal Investigator
NCT01371981	Rene Y. McNall-Knapp	Principal Investigator
NCT01371981	Steven L. Halpern	Principal Investigator
NCT01415752	Bret E. Friday	Principal Investigator
NCT01415752	Peter R. Watson	Principal Investigator
NCT01415752	Thomas H. Openshaw	Principal Investigator
NCT01503515	Rene Y. McNall-Knapp	Principal Investigator
NCT01503515	Steven J. Kuerbitz	Principal Investigator
NCT01503632	Gregory A. Hale	Principal Investigator
NCT01503632	Rene Y. McNall-Knapp	Principal Investigator
NCT01503632	Steven J. Kuerbitz	Principal Investigator
NCT01503632	Steven L. Halpern	Principal Investigator
NCT01507428	Sharad A. Ghamande	Principal Investigator
NCT01535053	Sharad A. Ghamande	Principal Investigator
NCT01575548	Peter R. Watson	Principal Investigator
NCT01602666	Gregory A. Hale	Principal Investigator
NCT01602666	Rene Y. McNall-Knapp	Principal Investigator
NCT01602666	Steven J. Kuerbitz	Principal Investigator
NCT01602666	Steven L. Halpern	Principal Investigator
NCT01668719	Bret E. Friday	Principal Investigator
NCT01668719	Peter R. Watson	Principal Investigator
NCT01674140	Bret E. Friday	Principal Investigator
NCT01674140	Sharad A. Ghamande	Principal Investigator
NCT01674140	Thomas H. Openshaw	Principal Investigator
NCT01711515	Sharad A. Ghamande	Principal Investigator
NCT01767194	Gregory A. Hale	Principal Investigator
NCT01767194	Rene Y. McNall-Knapp	Principal Investigator
NCT01767194	Steven J. Kuerbitz	Principal Investigator
NCT01767194	Steven L. Halpern	Principal Investigator
NCT01809691	Bret E. Friday	Principal Investigator
NCT01809691	Peter R. Watson	Principal Investigator
NCT01809691	Thomas H. Openshaw	Principal Investigator
NCT01822496	Bret E. Friday	Principal Investigator
NCT01856192	Bret E. Friday	Principal Investigator
NCT01856192	Peter R. Watson	Principal Investigator
NCT01856192	Thomas H. Openshaw	Principal Investigator
NCT01863550	Bret E. Friday	Principal Investigator
NCT01863550	Thomas H. Openshaw	Principal Investigator
NCT01950390	Peter R. Watson	Principal Investigator
NCT01950390	Thomas H. Openshaw	Principal Investigator
NCT01979536	Gregory A. Hale	Principal Investigator
NCT01979536	Rene Y. McNall-Knapp	Principal Investigator
NCT01979536	Steven J. Kuerbitz	Principal Investigator
NCT01979536	Steven L. Halpern	Principal Investigator
NCT02003222	Thomas H. Openshaw	Principal Investigator
NCT02017964	Gregory A. Hale	Principal Investigator
NCT02017964	Rene Y. McNall-Knapp	Principal Investigator
NCT02017964	Steven J. Kuerbitz	Principal Investigator
NCT02017964	Steven L. Halpern	Principal Investigator
NCT02085408	Peter R. Watson	Principal Investigator
NCT02085408	Sharad A. Ghamande	Principal Investigator
NCT02085408	Thomas H. Openshaw	Principal Investigator
NCT02101853	Gregory A. Hale	Principal Investigator
NCT02101853	Rene Y. McNall-Knapp	Principal Investigator
NCT02101853	Steven J. Kuerbitz	Principal Investigator
NCT02101853	Steven L. Halpern	Principal Investigator
NCT02112916	Gregory A. Hale	Principal Investigator
NCT02112916	Rene Y. McNall-Knapp	Principal Investigator
NCT02112916	Steven J. Kuerbitz	Principal Investigator
NCT02112916	Steven L. Halpern	Principal Investigator
NCT02115282	Bret E. Friday	Principal Investigator
NCT02115282	Peter R. Watson	Principal Investigator
NCT02115282	Thomas H. Openshaw	Principal Investigator
NCT02152982	Bret E. Friday	Principal Investigator
NCT02152982	Peter R. Watson	Principal Investigator
NCT02152982	Thomas H. Openshaw	Principal Investigator
NCT02154490	Bret E. Friday	Principal Investigator
NCT02154490	Sharad A. Ghamande	Principal Investigator
NCT02154490	Thomas H. Openshaw	Principal Investigator
NCT02176967	Gregory A. Hale	Principal Investigator
NCT02176967	Rene Y. McNall-Knapp	Principal Investigator
NCT02176967	Steven J. Kuerbitz	Principal Investigator
NCT02176967	Steven L. Halpern	Principal Investigator
NCT02180867	Gregory A. Hale	Principal Investigator
NCT02180867	Steven J. Kuerbitz	Principal Investigator
NCT02180867	Steven L. Halpern	Principal Investigator
NCT02186847	Sharad A. Ghamande	Principal Investigator
NCT02193282	Bret E. Friday	Principal Investigator
NCT02193282	Peter R. Watson	Principal Investigator
NCT02193282	Sharad A. Ghamande	Principal Investigator
NCT02193282	Thomas H. Openshaw	Principal Investigator
NCT02201992	Bret E. Friday	Principal Investigator
NCT02201992	Peter R. Watson	Principal Investigator
NCT02201992	Sharad A. Ghamande	Principal Investigator
NCT02201992	Thomas H. Openshaw	Principal Investigator
NCT02254278	Peter R. Watson	Principal Investigator
NCT02306161	Gregory A. Hale	Principal Investigator
NCT02306161	Rene Y. McNall-Knapp	Principal Investigator
NCT02306161	Steven J. Kuerbitz	Principal Investigator
NCT02306161	Steven L. Halpern	Principal Investigator
NCT02785913	Bret E. Friday	Principal Investigator
NCT02785913	Peter R. Watson	Principal Investigator
NCT02785913	Sharad A. Ghamande	Principal Investigator
NCT02785913	Thomas H. Openshaw	Principal Investigator
NCT02785939	Bret E. Friday	Principal Investigator
NCT02785939	Peter R. Watson	Principal Investigator
NCT02785939	Sharad A. Ghamande	Principal Investigator
NCT02785939	Thomas H. Openshaw	Principal Investigator
NCT02883049	Gregory A. Hale	Principal Investigator
NCT02883049	Rene Y. McNall-Knapp	Principal Investigator
NCT02883049	Steven J. Kuerbitz	Principal Investigator
NCT02883049	Steven L. Halpern	Principal Investigator
NCT00492778	Philip J. Stella	Principal Investigator
NCT00565851	Philip J. Stella	Principal Investigator
NCT00565851	Rakesh Gaur	Principal Investigator
NCT00888615	Philip J. Stella	Principal Investigator
NCT00956007	Preston D. Steen	Principal Investigator
NCT00980460	Bassem I. Razzouk	Principal Investigator
NCT00980460	Leo Mascarenhas	Principal Investigator
NCT00980460	Michael S. Isakoff	Principal Investigator
NCT00980460	Minnie Abromowitch	Principal Investigator
NCT00980460	Robert M. Cooper	Principal Investigator
NCT00980460	Violet Shen	Principal Investigator
NCT00980460	Wendy L. Woods-Swafford	Principal Investigator
NCT00980460	Yousif (Joe) H. Matloub	Principal Investigator
NCT01013649	John A. Keech	Principal Investigator
NCT01013649	Rakesh Gaur	Principal Investigator
NCT01013649	Steven J. Jubelirer	Principal Investigator
NCT01013649	Thomas E. Lad	Principal Investigator
NCT01096368	Bassem I. Razzouk	Principal Investigator
NCT01096368	Leo Mascarenhas	Principal Investigator
NCT01096368	Michael S. Isakoff	Principal Investigator
NCT01096368	Minnie Abromowitch	Principal Investigator
NCT01096368	Robert M. Cooper	Principal Investigator
NCT01096368	Violet Shen	Principal Investigator
NCT01096368	Wendy L. Woods-Swafford	Principal Investigator
NCT01096368	Yousif (Joe) H. Matloub	Principal Investigator
NCT01101451	Augusto C. Ochoa	Principal Investigator
NCT01101451	John A. Keech	Principal Investigator
NCT01101451	Philip J. Stella	Principal Investigator
NCT01169337	John A. Keech	Principal Investigator
NCT01169337	Rakesh Gaur	Principal Investigator
NCT01169337	Steven J. Jubelirer	Principal Investigator
NCT01169337	Timothy R. Wassenaar	Principal Investigator
NCT01190930	Bassem I. Razzouk	Principal Investigator
NCT01190930	Leo Mascarenhas	Principal Investigator
NCT01190930	Michael S. Isakoff	Principal Investigator
NCT01190930	Minnie Abromowitch	Principal Investigator
NCT01190930	Robert M. Cooper	Principal Investigator
NCT01190930	Violet Shen	Principal Investigator
NCT01190930	Wendy L. Woods-Swafford	Principal Investigator
NCT01190930	Yousif (Joe) H. Matloub	Principal Investigator
NCT01216683	Preston D. Steen	Principal Investigator
NCT01216683	Steven J. Jubelirer	Principal Investigator
NCT01216683	Timothy R. Wassenaar	Principal Investigator
NCT01272037	Augusto C. Ochoa	Principal Investigator
NCT01272037	Jeffrey L. Berenberg	Principal Investigator
NCT01272037	John A. Keech	Principal Investigator
NCT01272037	Philip J. Stella	Principal Investigator
NCT01272037	Rakesh Gaur	Principal Investigator
NCT01272037	Steven J. Jubelirer	Principal Investigator
NCT01272037	Thomas E. Lad	Principal Investigator
NCT01272037	Timothy R. Wassenaar	Principal Investigator
NCT01307579	Bassem I. Razzouk	Principal Investigator
NCT01307579	Leo Mascarenhas	Principal Investigator
NCT01307579	Michael S. Isakoff	Principal Investigator
NCT01307579	Minnie Abromowitch	Principal Investigator
NCT01307579	Robert M. Cooper	Principal Investigator
NCT01307579	Violet Shen	Principal Investigator
NCT01307579	Wendy L. Woods-Swafford	Principal Investigator
NCT01307579	Yousif (Joe) H. Matloub	Principal Investigator
NCT01349881	Jeffrey L. Berenberg	Principal Investigator
NCT01349881	John A. Keech	Principal Investigator
NCT01349881	Philip J. Stella	Principal Investigator
NCT01371656	Bassem I. Razzouk	Principal Investigator
NCT01371656	Leo Mascarenhas	Principal Investigator
NCT01371656	Minnie Abromowitch	Principal Investigator
NCT01371656	Robert M. Cooper	Principal Investigator
NCT01371656	Wendy L. Woods-Swafford	Principal Investigator
NCT01371981	Bassem I. Razzouk	Principal Investigator
NCT01371981	Leo Mascarenhas	Principal Investigator
NCT01371981	Michael S. Isakoff	Principal Investigator
NCT01371981	Robert M. Cooper	Principal Investigator
NCT01371981	Violet Shen	Principal Investigator
NCT01371981	Wendy L. Woods-Swafford	Principal Investigator
NCT01371981	Yousif (Joe) H. Matloub	Principal Investigator
NCT01386385	Jeffrey L. Berenberg	Principal Investigator
NCT01414608	Augusto C. Ochoa	Principal Investigator
NCT01414608	Thomas E. Lad	Principal Investigator
NCT01415752	Jeffrey L. Berenberg	Principal Investigator
NCT01415752	Rakesh Gaur	Principal Investigator
NCT01415752	Timothy R. Wassenaar	Principal Investigator
NCT01503515	Minnie Abromowitch	Principal Investigator
NCT01503515	Violet Shen	Principal Investigator
NCT01503515	Yousif (Joe) H. Matloub	Principal Investigator
NCT01503632	Bassem I. Razzouk	Principal Investigator
NCT01503632	Leo Mascarenhas	Principal Investigator
NCT01503632	Michael S. Isakoff	Principal Investigator
NCT01503632	Minnie Abromowitch	Principal Investigator
NCT01503632	Robert M. Cooper	Principal Investigator
NCT01503632	Wendy L. Woods-Swafford	Principal Investigator
NCT01503632	Yousif (Joe) H. Matloub	Principal Investigator
NCT01507428	Rakesh Gaur	Principal Investigator
NCT01533207	John A. Keech	Principal Investigator
NCT01533207	Rakesh Gaur	Principal Investigator
NCT01533207	Thomas E. Lad	Principal Investigator
NCT01575548	Augusto C. Ochoa	Principal Investigator
NCT01575548	John A. Keech	Principal Investigator
NCT01575548	Philip J. Stella	Principal Investigator
NCT01575548	Steven J. Jubelirer	Principal Investigator
NCT01575548	Timothy R. Wassenaar	Principal Investigator
NCT01602666	Bassem I. Razzouk	Principal Investigator
NCT01602666	Leo Mascarenhas	Principal Investigator
NCT01602666	Michael S. Isakoff	Principal Investigator
NCT01602666	Violet Shen	Principal Investigator
NCT01602666	Wendy L. Woods-Swafford	Principal Investigator
NCT01602666	Yousif (Joe) H. Matloub	Principal Investigator
NCT01622868	Rakesh Gaur	Principal Investigator
NCT01622868	Thomas E. Lad	Principal Investigator
NCT01668719	Preston D. Steen	Principal Investigator
NCT01668719	Rakesh Gaur	Principal Investigator
NCT01674140	Augusto C. Ochoa	Principal Investigator
NCT01674140	Jeffrey L. Berenberg	Principal Investigator
NCT01674140	John A. Keech	Principal Investigator
NCT01674140	Philip J. Stella	Principal Investigator
NCT01674140	Rakesh Gaur	Principal Investigator
NCT01674140	Steven J. Jubelirer	Principal Investigator
NCT01674140	Thomas E. Lad	Principal Investigator
NCT01674140	Timothy R. Wassenaar	Principal Investigator
NCT01767194	Bassem I. Razzouk	Principal Investigator
NCT01767194	Leo Mascarenhas	Principal Investigator
NCT01767194	Michael S. Isakoff	Principal Investigator
NCT01767194	Minnie Abromowitch	Principal Investigator
NCT01767194	Robert M. Cooper	Principal Investigator
NCT01767194	Violet Shen	Principal Investigator
NCT01767194	Wendy L. Woods-Swafford	Principal Investigator
NCT01767194	Yousif (Joe) H. Matloub	Principal Investigator
NCT01809691	Augusto C. Ochoa	Principal Investigator
NCT01809691	Jeffrey L. Berenberg	Principal Investigator
NCT01809691	Philip J. Stella	Principal Investigator
NCT01809691	Preston D. Steen	Principal Investigator
NCT01809691	Steven J. Jubelirer	Principal Investigator
NCT01856192	Jeffrey L. Berenberg	Principal Investigator
NCT01856192	Preston D. Steen	Principal Investigator
NCT01856192	Rakesh Gaur	Principal Investigator
NCT01856192	Steven J. Jubelirer	Principal Investigator
NCT01856192	Timothy R. Wassenaar	Principal Investigator
NCT01863550	Augusto C. Ochoa	Principal Investigator
NCT01863550	Jeffrey L. Berenberg	Principal Investigator
NCT01863550	Preston D. Steen	Principal Investigator
NCT01863550	Steven J. Jubelirer	Principal Investigator
NCT01863550	Timothy R. Wassenaar	Principal Investigator
NCT01950390	Timothy R. Wassenaar	Principal Investigator
NCT01959139	Rakesh Gaur	Principal Investigator
NCT01979536	Bassem I. Razzouk	Principal Investigator
NCT01979536	Leo Mascarenhas	Principal Investigator
NCT01979536	Michael S. Isakoff	Principal Investigator
NCT01979536	Minnie Abromowitch	Principal Investigator
NCT01979536	Robert M. Cooper	Principal Investigator
NCT01979536	Violet Shen	Principal Investigator
NCT01979536	Wendy L. Woods-Swafford	Principal Investigator
NCT01979536	Yousif (Joe) H. Matloub	Principal Investigator
NCT02017964	Michael S. Isakoff	Principal Investigator
NCT02017964	Minnie Abromowitch	Principal Investigator
NCT02017964	Robert M. Cooper	Principal Investigator
NCT02017964	Violet Shen	Principal Investigator
NCT02017964	Wendy L. Woods-Swafford	Principal Investigator
NCT02017964	Yousif (Joe) H. Matloub	Principal Investigator
NCT02085408	Jeffrey L. Berenberg	Principal Investigator
NCT02085408	Preston D. Steen	Principal Investigator
NCT02085408	Steven J. Jubelirer	Principal Investigator
NCT02085408	Timothy R. Wassenaar	Principal Investigator
NCT02101788	John A. Keech	Principal Investigator
NCT02101788	Philip J. Stella	Principal Investigator
NCT02101853	Bassem I. Razzouk	Principal Investigator
NCT02101853	Leo Mascarenhas	Principal Investigator
NCT02101853	Michael S. Isakoff	Principal Investigator
NCT02101853	Minnie Abromowitch	Principal Investigator
NCT02101853	Robert M. Cooper	Principal Investigator
NCT02101853	Violet Shen	Principal Investigator
NCT02101853	Yousif (Joe) H. Matloub	Principal Investigator
NCT02112916	Bassem I. Razzouk	Principal Investigator
NCT02112916	Leo Mascarenhas	Principal Investigator
NCT02112916	Michael S. Isakoff	Principal Investigator
NCT02112916	Minnie Abromowitch	Principal Investigator
NCT02112916	Robert M. Cooper	Principal Investigator
NCT02112916	Violet Shen	Principal Investigator
NCT02112916	Wendy L. Woods-Swafford	Principal Investigator
NCT02112916	Yousif (Joe) H. Matloub	Principal Investigator
NCT02115282	Augusto C. Ochoa	Principal Investigator
NCT02115282	Jeffrey L. Berenberg	Principal Investigator
NCT02115282	Preston D. Steen	Principal Investigator
NCT02115282	Rakesh Gaur	Principal Investigator
NCT02115282	Steven J. Jubelirer	Principal Investigator
NCT02115282	Thomas E. Lad	Principal Investigator
NCT02115282	Timothy R. Wassenaar	Principal Investigator
NCT02135042	Thomas E. Lad	Principal Investigator
NCT02152982	Augusto C. Ochoa	Principal Investigator
NCT02152982	Jeffrey L. Berenberg	Principal Investigator
NCT02152982	John A. Keech	Principal Investigator
NCT02152982	Preston D. Steen	Principal Investigator
NCT02152982	Rakesh Gaur	Principal Investigator
NCT02152982	Timothy R. Wassenaar	Principal Investigator
NCT02154490	Augusto C. Ochoa	Principal Investigator
NCT02154490	John A. Keech	Principal Investigator
NCT02154490	Philip J. Stella	Principal Investigator
NCT02154490	Preston D. Steen	Principal Investigator
NCT02154490	Steven J. Jubelirer	Principal Investigator
NCT02154490	Thomas E. Lad	Principal Investigator
NCT02176967	Bassem I. Razzouk	Principal Investigator
NCT02176967	Leo Mascarenhas	Principal Investigator
NCT02176967	Michael S. Isakoff	Principal Investigator
NCT02176967	Minnie Abromowitch	Principal Investigator
NCT02176967	Robert M. Cooper	Principal Investigator
NCT02176967	Violet Shen	Principal Investigator
NCT02176967	Wendy L. Woods-Swafford	Principal Investigator
NCT02177695	Jeffrey L. Berenberg	Principal Investigator
NCT02179086	Preston D. Steen	Principal Investigator
NCT02179086	Thomas E. Lad	Principal Investigator
NCT02180867	Bassem I. Razzouk	Principal Investigator
NCT02180867	Leo Mascarenhas	Principal Investigator
NCT02180867	Michael S. Isakoff	Principal Investigator
NCT02180867	Minnie Abromowitch	Principal Investigator
NCT02180867	Robert M. Cooper	Principal Investigator
NCT02180867	Violet Shen	Principal Investigator
NCT02180867	Wendy L. Woods-Swafford	Principal Investigator
NCT02180867	Yousif (Joe) H. Matloub	Principal Investigator
NCT02186847	Augusto C. Ochoa	Principal Investigator
NCT02186847	Philip J. Stella	Principal Investigator
NCT02186847	Preston D. Steen	Principal Investigator
NCT02186847	Thomas E. Lad	Principal Investigator
NCT02193282	Augusto C. Ochoa	Principal Investigator
NCT02193282	Jeffrey L. Berenberg	Principal Investigator
NCT02193282	John A. Keech	Principal Investigator
NCT02193282	Philip J. Stella	Principal Investigator
NCT02193282	Preston D. Steen	Principal Investigator
NCT02193282	Steven J. Jubelirer	Principal Investigator
NCT02193282	Thomas E. Lad	Principal Investigator
NCT02193282	Timothy R. Wassenaar	Principal Investigator
NCT02201992	Augusto C. Ochoa	Principal Investigator
NCT02201992	Jeffrey L. Berenberg	Principal Investigator
NCT02201992	John A. Keech	Principal Investigator
NCT02201992	Philip J. Stella	Principal Investigator
NCT02201992	Preston D. Steen	Principal Investigator
NCT02201992	Steven J. Jubelirer	Principal Investigator
NCT02201992	Thomas E. Lad	Principal Investigator
NCT02201992	Timothy R. Wassenaar	Principal Investigator
NCT02254278	John A. Keech	Principal Investigator
NCT02254278	Thomas E. Lad	Principal Investigator
NCT02267603	Augusto C. Ochoa	Principal Investigator
NCT02306161	Bassem I. Razzouk	Principal Investigator
NCT02306161	Leo Mascarenhas	Principal Investigator
NCT02306161	Michael S. Isakoff	Principal Investigator
NCT02306161	Minnie Abromowitch	Principal Investigator
NCT02306161	Robert M. Cooper	Principal Investigator
NCT02306161	Violet Shen	Principal Investigator
NCT02306161	Wendy L. Woods-Swafford	Principal Investigator
NCT02306161	Yousif (Joe) H. Matloub	Principal Investigator
NCT02785913	Augusto C. Ochoa	Principal Investigator
NCT02785913	Jeffrey L. Berenberg	Principal Investigator
NCT02785913	John A. Keech	Principal Investigator
NCT02785913	Philip J. Stella	Principal Investigator
NCT02785913	Preston D. Steen	Principal Investigator
NCT02785913	Rakesh Gaur	Principal Investigator
NCT02785913	Steven J. Jubelirer	Principal Investigator
NCT02785913	Thomas E. Lad	Principal Investigator
NCT02785913	Timothy R. Wassenaar	Principal Investigator
NCT02785939	Augusto C. Ochoa	Principal Investigator
NCT02785939	Jeffrey L. Berenberg	Principal Investigator
NCT02785939	John A. Keech	Principal Investigator
NCT02785939	Philip J. Stella	Principal Investigator
NCT02785939	Preston D. Steen	Principal Investigator
NCT02785939	Rakesh Gaur	Principal Investigator
NCT02785939	Steven J. Jubelirer	Principal Investigator
NCT02785939	Thomas E. Lad	Principal Investigator
NCT02785939	Timothy R. Wassenaar	Principal Investigator
NCT02883049	Bassem I. Razzouk	Principal Investigator
NCT02883049	Leo Mascarenhas	Principal Investigator
NCT02883049	Michael S. Isakoff	Principal Investigator
NCT02883049	Minnie Abromowitch	Principal Investigator
NCT02883049	Robert M. Cooper	Principal Investigator
NCT02883049	Violet Shen	Principal Investigator
NCT02883049	Wendy L. Woods-Swafford	Principal Investigator
NCT02883049	Yousif (Joe) H. Matloub	Principal Investigator
NCT00198523	Tim McNamara, PharmD	Study Director
NCT00198536	Tim McNamara, PharmD	Study Director
NCT00392327	Janice F. Olson	Principal Investigator
NCT00419666	Michael Graeber, MD	Study Director
NCT00421993	Michael Graeber, MD	Study Director
NCT00422240	Michael Graeber, MD	Study Director
NCT00560703	Michael Graeber, MD	Study Director
NCT00585975	Tim McNamara, PharmD	Study Director
NCT00586625	Tim McNamara, PharmD	Study Director
NCT00586664	Tim McNamara, PharmD	Study Director
NCT00625326	Michael Graeber, MD	Study Director
NCT00660985	Michael Graeber, MD	Study Director
NCT00667004	Tim McNamara, PharmD	Study Director
NCT00699803	Tim McNamara, PharmD	Study Director
NCT00758784	Tim McNamara, PharmD	Study Director
NCT00853970	Tim McNamara, PharmD	Study Director
NCT00854061	Tim McNamara, PharmD	Study Director
NCT00888615	James E. Radford	Principal Investigator
NCT00919763	Michael Graeber, MD	Study Director
NCT00980460	Alyssa T. Reddy	Principal Investigator
NCT00980460	Bethany G. Sleckman	Principal Investigator
NCT00980460	Craig Lotterman	Principal Investigator
NCT00980460	Emad K. Salman	Principal Investigator
NCT00980460	Eric J. Lowe	Principal Investigator
NCT00980460	Janice F. Olson	Principal Investigator
NCT00980460	Koh B. Boayue	Principal Investigator
NCT00980460	Mary L. Schmidt	Principal Investigator
NCT00980460	Narayana Gowda	Principal Investigator
NCT00980460	Neyssa M. Marina	Principal Investigator
NCT00980460	Stuart H. Gold	Principal Investigator
NCT00989014	Michael Graeber, MD	Study Director
NCT01013649	Bruce J. Averbook	Principal Investigator
NCT01096368	Alyssa T. Reddy	Principal Investigator
NCT01096368	Bethany G. Sleckman	Principal Investigator
NCT01096368	Emad K. Salman	Principal Investigator
NCT01096368	Eric J. Lowe	Principal Investigator
NCT01096368	Janice F. Olson	Principal Investigator
NCT01096368	Koh B. Boayue	Principal Investigator
NCT01096368	Mary L. Schmidt	Principal Investigator
NCT01096368	Narayana Gowda	Principal Investigator
NCT01096368	Neyssa M. Marina	Principal Investigator
NCT01096368	Stuart H. Gold	Principal Investigator
NCT01106807	Michael Graeber, MD	Study Director
NCT01121302	David Mathews, MD	Principal Investigator
NCT01138735	Michael Graeber, MD	Study Director
NCT01145768	David Mathews, MD	Principal Investigator
NCT01169337	Bruce J. Averbook	Principal Investigator
NCT01171105	David Mathews, MD	Principal Investigator
NCT01174030	Michael Graeber, MD	Study Director
NCT01174823	Tim McNamara, PharmD	Study Director
NCT01190930	Alyssa T. Reddy	Principal Investigator
NCT01190930	Bethany G. Sleckman	Principal Investigator
NCT01190930	Craig Lotterman	Principal Investigator
NCT01190930	Emad K. Salman	Principal Investigator
NCT01190930	Eric J. Lowe	Principal Investigator
NCT01190930	Janice F. Olson	Principal Investigator
NCT01190930	Koh B. Boayue	Principal Investigator
NCT01190930	Mary L. Schmidt	Principal Investigator
NCT01190930	Narayana Gowda	Principal Investigator
NCT01190930	Neyssa M. Marina	Principal Investigator
NCT01190930	Stuart H. Gold	Principal Investigator
NCT01212471	Tim McNamara, PharmD	Study Director
NCT01216683	Bruce J. Averbook	Principal Investigator
NCT01216683	Terrence P. Cescon	Principal Investigator
NCT01272037	Bruce J. Averbook	Principal Investigator
NCT01277341	Tim McNamara, PharmD	Study Director
NCT01290900	David Mathews, MD	Principal Investigator
NCT01307579	Alyssa T. Reddy	Principal Investigator
NCT01307579	Bethany G. Sleckman	Principal Investigator
NCT01307579	Craig Lotterman	Principal Investigator
NCT01307579	Emad K. Salman	Principal Investigator
NCT01307579	Eric J. Lowe	Principal Investigator
NCT01307579	Janice F. Olson	Principal Investigator
NCT01307579	Koh B. Boayue	Principal Investigator
NCT01307579	Mary L. Schmidt	Principal Investigator
NCT01307579	Narayana Gowda	Principal Investigator
NCT01307579	Stuart H. Gold	Principal Investigator
NCT01320033	Michael Graeber, MD	Study Director
NCT01349881	James E. Radford	Principal Investigator
NCT01355458	Michael Graeber, MD	Study Chair
NCT01355471	Michael Graeber, MD	Study Chair
NCT01365000	David Mathews, MD	Principal Investigator
NCT01367249	Tim McNamara, PharmD	Study Director
NCT01371656	Bethany G. Sleckman	Principal Investigator
NCT01371656	Craig Lotterman	Principal Investigator
NCT01371656	Emad K. Salman	Principal Investigator
NCT01371656	Eric J. Lowe	Principal Investigator
NCT01371656	Koh B. Boayue	Principal Investigator
NCT01371656	Narayana Gowda	Principal Investigator
NCT01371981	Alyssa T. Reddy	Principal Investigator
NCT01371981	Bethany G. Sleckman	Principal Investigator
NCT01371981	Craig Lotterman	Principal Investigator
NCT01371981	Emad K. Salman	Principal Investigator
NCT01371981	Eric J. Lowe	Principal Investigator
NCT01371981	Janice F. Olson	Principal Investigator
NCT01371981	Koh B. Boayue	Principal Investigator
NCT01371981	Mary L. Schmidt	Principal Investigator
NCT01371981	Narayana Gowda	Principal Investigator
NCT01371981	Stuart H. Gold	Principal Investigator
NCT01415752	Bruce J. Averbook	Principal Investigator
NCT01415752	James E. Radford	Principal Investigator
NCT01415752	Terrence P. Cescon	Principal Investigator
NCT01458899	David Mathews, MD	Principal Investigator
NCT01503515	Neyssa M. Marina	Principal Investigator
NCT01503515	Stuart H. Gold	Principal Investigator
NCT01503632	Alyssa T. Reddy	Principal Investigator
NCT01503632	Bethany G. Sleckman	Principal Investigator
NCT01503632	Craig Lotterman	Principal Investigator
NCT01503632	Emad K. Salman	Principal Investigator
NCT01503632	Janice F. Olson	Principal Investigator
NCT01503632	Koh B. Boayue	Principal Investigator
NCT01503632	Mary L. Schmidt	Principal Investigator
NCT01503632	Narayana Gowda	Principal Investigator
NCT01503632	Neyssa M. Marina	Principal Investigator
NCT01534247	David Mathews, MD	Principal Investigator
NCT01575548	Bruce J. Averbook	Principal Investigator
NCT01578278	Tim McNamara, PharmD	Study Director
NCT01602666	Alyssa T. Reddy	Principal Investigator
NCT01602666	Bethany G. Sleckman	Principal Investigator
NCT01602666	Emad K. Salman	Principal Investigator
NCT01602666	Janice F. Olson	Principal Investigator
NCT01602666	Koh B. Boayue	Principal Investigator
NCT01602666	Mary L. Schmidt	Principal Investigator
NCT01602666	Neyssa M. Marina	Principal Investigator
NCT01602666	Stuart H. Gold	Principal Investigator
NCT01645085	David Mathews, MD	Principal Investigator
NCT01674140	Bruce J. Averbook	Principal Investigator
NCT01674140	James E. Radford	Principal Investigator
NCT01674140	Terrence P. Cescon	Principal Investigator
NCT01711554	Neyssa M. Marina	Principal Investigator
NCT01725230	David Mathews, MD	Principal Investigator
NCT01767194	Bethany G. Sleckman	Principal Investigator
NCT01767194	Craig Lotterman	Principal Investigator
NCT01767194	Emad K. Salman	Principal Investigator
NCT01767194	Eric J. Lowe	Principal Investigator
NCT01767194	Janice F. Olson	Principal Investigator
NCT01767194	Koh B. Boayue	Principal Investigator
NCT01767194	Mary L. Schmidt	Principal Investigator
NCT01767194	Neyssa M. Marina	Principal Investigator
NCT01767194	Stuart H. Gold	Principal Investigator
NCT01809691	Bruce J. Averbook	Principal Investigator
NCT01809691	James E. Radford	Principal Investigator
NCT01809691	Terrence P. Cescon	Principal Investigator
NCT01856192	Bruce J. Averbook	Principal Investigator
NCT01856192	James E. Radford	Principal Investigator
NCT01856192	Terrence P. Cescon	Principal Investigator
NCT01858935	David Mathews, MD	Principal Investigator
NCT01863550	Bruce J. Averbook	Principal Investigator
NCT01863550	James E. Radford	Principal Investigator
NCT01863550	Terrence P. Cescon	Principal Investigator
NCT01921920	David Mathews, MD	Principal Investigator
NCT01929629	David Mathews, MD	Principal Investigator
NCT01932242	David Mathews, MD	Principal Investigator
NCT01950390	James E. Radford	Principal Investigator
NCT01950390	Terrence P. Cescon	Principal Investigator
NCT01952444	David Mathews, MD	Principal Investigator
NCT01959139	James E. Radford	Principal Investigator
NCT01979536	Alyssa T. Reddy	Principal Investigator
NCT01979536	Bethany G. Sleckman	Principal Investigator
NCT01979536	Craig Lotterman	Principal Investigator
NCT01979536	Emad K. Salman	Principal Investigator
NCT01979536	Eric J. Lowe	Principal Investigator
NCT01979536	Koh B. Boayue	Principal Investigator
NCT01979536	Mary L. Schmidt	Principal Investigator
NCT01979536	Narayana Gowda	Principal Investigator
NCT01979536	Neyssa M. Marina	Principal Investigator
NCT01979536	Stuart H. Gold	Principal Investigator
NCT02017964	Alyssa T. Reddy	Principal Investigator
NCT02017964	Craig Lotterman	Principal Investigator
NCT02017964	Eric J. Lowe	Principal Investigator
NCT02017964	Koh B. Boayue	Principal Investigator
NCT02017964	Narayana Gowda	Principal Investigator
NCT02085408	Bethany G. Sleckman	Principal Investigator
NCT02101853	Bethany G. Sleckman	Principal Investigator
NCT02101853	Craig Lotterman	Principal Investigator
NCT02101853	Emad K. Salman	Principal Investigator
NCT02101853	Eric J. Lowe	Principal Investigator
NCT02101853	Janice F. Olson	Principal Investigator
NCT02101853	Mary L. Schmidt	Principal Investigator
NCT02101853	Narayana Gowda	Principal Investigator
NCT02101853	Neyssa M. Marina	Principal Investigator
NCT02101853	Stuart H. Gold	Principal Investigator
NCT02112916	Alyssa T. Reddy	Principal Investigator
NCT02112916	Bethany G. Sleckman	Principal Investigator
NCT02112916	Craig Lotterman	Principal Investigator
NCT02112916	Emad K. Salman	Principal Investigator
NCT02112916	Eric J. Lowe	Principal Investigator
NCT02112916	Janice F. Olson	Principal Investigator
NCT02112916	Koh B. Boayue	Principal Investigator
NCT02112916	Mary L. Schmidt	Principal Investigator
NCT02112916	Narayana Gowda	Principal Investigator
NCT02112916	Neyssa M. Marina	Principal Investigator
NCT02112916	Stuart H. Gold	Principal Investigator
NCT02115282	James E. Radford	Principal Investigator
NCT02115282	Terrence P. Cescon	Principal Investigator
NCT02116777	Alyssa T. Reddy	Principal Investigator
NCT02135042	Terrence P. Cescon	Principal Investigator
NCT02154490	Bruce J. Averbook	Principal Investigator
NCT02154490	James E. Radford	Principal Investigator
NCT02154490	Terrence P. Cescon	Principal Investigator
NCT02176967	Alyssa T. Reddy	Principal Investigator
NCT02176967	Bethany G. Sleckman	Principal Investigator
NCT02176967	Craig Lotterman	Principal Investigator
NCT02176967	Eric J. Lowe	Principal Investigator
NCT02176967	Janice F. Olson	Principal Investigator
NCT02176967	Koh B. Boayue	Principal Investigator
NCT02176967	Mary L. Schmidt	Principal Investigator
NCT02176967	Narayana Gowda	Principal Investigator
NCT02176967	Neyssa M. Marina	Principal Investigator
NCT02176967	Stuart H. Gold	Principal Investigator
NCT02179086	Terrence P. Cescon	Principal Investigator
NCT02180867	Alyssa T. Reddy	Principal Investigator
NCT02180867	Craig Lotterman	Principal Investigator
NCT02180867	Emad K. Salman	Principal Investigator
NCT02180867	Eric J. Lowe	Principal Investigator
NCT02180867	Janice F. Olson	Principal Investigator
NCT02180867	Koh B. Boayue	Principal Investigator
NCT02180867	Mary L. Schmidt	Principal Investigator
NCT02180867	Narayana Gowda	Principal Investigator
NCT02180867	Neyssa M. Marina	Principal Investigator
NCT02180867	Stuart H. Gold	Principal Investigator
NCT02186665	Michael Graeber, MD	Study Director
NCT02186847	Terrence P. Cescon	Principal Investigator
NCT02193282	Bruce J. Averbook	Principal Investigator
NCT02193282	James E. Radford	Principal Investigator
NCT02201992	Bruce J. Averbook	Principal Investigator
NCT02201992	James E. Radford	Principal Investigator
NCT02226783	David Mathews, MD	Principal Investigator
NCT02254278	Terrence P. Cescon	Principal Investigator
NCT02306161	Alyssa T. Reddy	Principal Investigator
NCT02306161	Craig Lotterman	Principal Investigator
NCT02306161	Emad K. Salman	Principal Investigator
NCT02306161	Eric J. Lowe	Principal Investigator
NCT02306161	Janice F. Olson	Principal Investigator
NCT02306161	Mary L. Schmidt	Principal Investigator
NCT02306161	Narayana Gowda	Principal Investigator
NCT02306161	Neyssa M. Marina	Principal Investigator
NCT02306161	Stuart H. Gold	Principal Investigator
NCT02785913	Bruce J. Averbook	Principal Investigator
NCT02785913	James E. Radford	Principal Investigator
NCT02785913	Terrence P. Cescon	Principal Investigator
NCT02785939	Bruce J. Averbook	Principal Investigator
NCT02785939	James E. Radford	Principal Investigator
NCT02785939	Terrence P. Cescon	Principal Investigator
NCT02883049	Alyssa T. Reddy	Principal Investigator
NCT02883049	Bethany G. Sleckman	Principal Investigator
NCT02883049	Craig Lotterman	Principal Investigator
NCT02883049	Emad K. Salman	Principal Investigator
NCT02883049	Eric J. Lowe	Principal Investigator
NCT02883049	Janice F. Olson	Principal Investigator
NCT02883049	Koh B. Boayue	Principal Investigator
NCT02883049	Mary L. Schmidt	Principal Investigator
NCT02883049	Narayana Gowda	Principal Investigator
NCT02883049	Neyssa M. Marina	Principal Investigator
NCT02883049	Stuart H. Gold	Principal Investigator
NCT00099580	Lisa Porter, MD	Study Director
NCT00103935	Lisa Porter, MD	Study Director
NCT00110695	Norman Wolmark, MD	Principal Investigator
NCT00112021	Lisa Porter, MD	Study Director
NCT00189514	Lisa Porter, MD	Study Director
NCT00240253	Lisa Porter, MD	Study Director
NCT00254254	Lisa Porter, MD	Study Director
NCT00308139	Lisa Porter, MD	Study Director
NCT00313183	Lisa Porter, MD	Study Director
NCT00321828	Norman Wolmark, MD	Principal Investigator
NCT00365417	Norman Wolmark, MD	Principal Investigator
NCT00382070	Norman Wolmark, MD	Principal Investigator
NCT00392925	Lisa Porter, MD	Study Director
NCT00402077	Lisa Porter, MD	Study Director
NCT00408408	Norman Wolmark, MD	Principal Investigator
NCT00464646	Norman Wolmark, MD	Principal Investigator
NCT00467649	Lisa Porter, MD	Study Director
NCT00477581	Lisa Porter, MD	Study Director
NCT00486668	Norman Wolmark, MD	Principal Investigator
NCT00565851	Keith S. Lanier	Principal Investigator
NCT00637273	Lisa Porter, MD	Study Director
NCT00803647	Norman Wolmark, MD	Principal Investigator
NCT00877890	Lisa Porter, MD	Study Director
NCT00887536	Norman Wolmark, MD	Principal Investigator
NCT00888615	Albert S. DeNittis	Principal Investigator
NCT00980460	Douglas S. Hawkins	Principal Investigator
NCT00980460	Kayelyn J. Wagner	Principal Investigator
NCT00980460	Ronnie W. Neuberg	Principal Investigator
NCT00980460	William D. Roberts	Principal Investigator
NCT01008150	Norman Wolmark, MD	Principal Investigator
NCT01013649	Albert S. DeNittis	Principal Investigator
NCT01013649	Jeffrey H. Muler	Principal Investigator
NCT01096368	Ronnie W. Neuberg	Principal Investigator
NCT01096368	William D. Roberts	Principal Investigator
NCT01101451	Keith S. Lanier	Principal Investigator
NCT01169337	Gamini S. Soori	Principal Investigator
NCT01169337	Jeffrey H. Muler	Principal Investigator
NCT01169337	Keith S. Lanier	Principal Investigator
NCT01169337	Robert D. Siegel	Principal Investigator
NCT01190930	Douglas S. Hawkins	Principal Investigator
NCT01190930	Kayelyn J. Wagner	Principal Investigator
NCT01190930	Ronnie W. Neuberg	Principal Investigator
NCT01190930	William D. Roberts	Principal Investigator
NCT01272037	Gamini S. Soori	Principal Investigator
NCT01272037	Jeffrey H. Muler	Principal Investigator
NCT01272037	Robert D. Siegel	Principal Investigator
NCT01307579	Douglas S. Hawkins	Principal Investigator
NCT01307579	Kayelyn J. Wagner	Principal Investigator
NCT01307579	Ronnie W. Neuberg	Principal Investigator
NCT01307579	William D. Roberts	Principal Investigator
NCT01349881	Albert S. DeNittis	Principal Investigator
NCT01349881	Gamini S. Soori	Principal Investigator
NCT01371656	Kayelyn J. Wagner	Principal Investigator
NCT01371656	Ronnie W. Neuberg	Principal Investigator
NCT01371981	Douglas S. Hawkins	Principal Investigator
NCT01371981	Kayelyn J. Wagner	Principal Investigator
NCT01371981	Ronnie W. Neuberg	Principal Investigator
NCT01423123	Norman Wolmark, MD	Principal Investigator
NCT01503515	William D. Roberts	Principal Investigator
NCT01503632	Douglas S. Hawkins	Principal Investigator
NCT01503632	Ronnie W. Neuberg	Principal Investigator
NCT01503632	William D. Roberts	Principal Investigator
NCT01533207	Albert S. DeNittis	Principal Investigator
NCT01533207	Keith S. Lanier	Principal Investigator
NCT01547741	Norman Wolmark, MD	Principal Investigator
NCT01575548	Jeffrey H. Muler	Principal Investigator
NCT01575548	Robert D. Siegel	Principal Investigator
NCT01602666	Kayelyn J. Wagner	Principal Investigator
NCT01602666	Ronnie W. Neuberg	Principal Investigator
NCT01668719	Gamini S. Soori	Principal Investigator
NCT01668719	Keith S. Lanier	Principal Investigator
NCT01674140	Albert S. DeNittis	Principal Investigator
NCT01674140	Gamini S. Soori	Principal Investigator
NCT01674140	Keith S. Lanier	Principal Investigator
NCT01674140	Robert D. Siegel	Principal Investigator
NCT01705691	Norman Wolmark, MD	Principal Investigator
NCT01767194	Douglas S. Hawkins	Principal Investigator
NCT01767194	Kayelyn J. Wagner	Principal Investigator
NCT01767194	Ronnie W. Neuberg	Principal Investigator
NCT01767194	William D. Roberts	Principal Investigator
NCT01822496	Albert S. DeNittis	Principal Investigator
NCT01856192	Jeffrey H. Muler	Principal Investigator
NCT01856192	Keith S. Lanier	Principal Investigator
NCT01863550	Gamini S. Soori	Principal Investigator
NCT01863550	Jeffrey H. Muler	Principal Investigator
NCT01863550	Robert D. Siegel	Principal Investigator
NCT01898494	Keith S. Lanier	Principal Investigator
NCT01902173	Keith S. Lanier	Principal Investigator
NCT01950390	Gamini S. Soori	Principal Investigator
NCT01960023	Norman Wolmark, MD	Principal Investigator
NCT01979536	Douglas S. Hawkins	Principal Investigator
NCT01979536	Kayelyn J. Wagner	Principal Investigator
NCT01979536	Ronnie W. Neuberg	Principal Investigator
NCT01979536	William D. Roberts	Principal Investigator
NCT02003222	Keith S. Lanier	Principal Investigator
NCT02003222	Robert D. Siegel	Principal Investigator
NCT02017964	Douglas S. Hawkins	Principal Investigator
NCT02101788	Jeffrey H. Muler	Principal Investigator
NCT02101853	Douglas S. Hawkins	Principal Investigator
NCT02101853	Kayelyn J. Wagner	Principal Investigator
NCT02101853	William D. Roberts	Principal Investigator
NCT02112916	Douglas S. Hawkins	Principal Investigator
NCT02112916	Kayelyn J. Wagner	Principal Investigator
NCT02112916	Ronnie W. Neuberg	Principal Investigator
NCT02112916	William D. Roberts	Principal Investigator
NCT02115282	Albert S. DeNittis	Principal Investigator
NCT02115282	Jeffrey H. Muler	Principal Investigator
NCT02115282	Keith S. Lanier	Principal Investigator
NCT02115282	Robert D. Siegel	Principal Investigator
NCT02134912	Gamini S. Soori	Principal Investigator
NCT02152982	Gamini S. Soori	Principal Investigator
NCT02152982	Keith S. Lanier	Principal Investigator
NCT02154490	Albert S. DeNittis	Principal Investigator
NCT02154490	Gamini S. Soori	Principal Investigator
NCT02154490	Jeffrey H. Muler	Principal Investigator
NCT02154490	Robert D. Siegel	Principal Investigator
NCT02176967	Douglas S. Hawkins	Principal Investigator
NCT02176967	Kayelyn J. Wagner	Principal Investigator
NCT02176967	William D. Roberts	Principal Investigator
NCT02180867	Albert S. DeNittis	Principal Investigator
NCT02180867	Douglas S. Hawkins	Principal Investigator
NCT02180867	Kayelyn J. Wagner	Principal Investigator
NCT02180867	Robert D. Siegel	Principal Investigator
NCT02180867	Ronnie W. Neuberg	Principal Investigator
NCT02180867	William D. Roberts	Principal Investigator
NCT02186847	Albert S. DeNittis	Principal Investigator
NCT02186847	Robert D. Siegel	Principal Investigator
NCT02193282	Albert S. DeNittis	Principal Investigator
NCT02193282	Gamini S. Soori	Principal Investigator
NCT02193282	Jeffrey H. Muler	Principal Investigator
NCT02193282	Keith S. Lanier	Principal Investigator
NCT02193282	Robert D. Siegel	Principal Investigator
NCT02201992	Albert S. DeNittis	Principal Investigator
NCT02201992	Gamini S. Soori	Principal Investigator
NCT02201992	Jeffrey H. Muler	Principal Investigator
NCT02201992	Keith S. Lanier	Principal Investigator
NCT02201992	Robert D. Siegel	Principal Investigator
NCT02254278	Jeffrey H. Muler	Principal Investigator
NCT02306161	Douglas S. Hawkins	Principal Investigator
NCT02306161	Kayelyn J. Wagner	Principal Investigator
NCT02306161	Ronnie W. Neuberg	Principal Investigator
NCT02306161	William D. Roberts	Principal Investigator
NCT02785913	Albert S. DeNittis	Principal Investigator
NCT02785913	Gamini S. Soori	Principal Investigator
NCT02785913	Jeffrey H. Muler	Principal Investigator
NCT02785913	Robert D. Siegel	Principal Investigator
NCT02785939	Albert S. DeNittis	Principal Investigator
NCT02785939	Gamini S. Soori	Principal Investigator
NCT02785939	Jeffrey H. Muler	Principal Investigator
NCT02785939	Robert D. Siegel	Principal Investigator
NCT02883049	Douglas S. Hawkins	Principal Investigator
NCT02883049	Kayelyn J. Wagner	Principal Investigator
NCT02883049	Ronnie W. Neuberg	Principal Investigator
NCT02883049	William D. Roberts	Principal Investigator
NCT00110279	Ruth A. Karron, MD	Principal Investigator
NCT00127803	Thomas Marbury, MD	Principal Investigator
NCT00255177	Thomas Marbury, MD	Principal Investigator
NCT00308412	Ruth A. Karron, MD	Principal Investigator
NCT00311350	Jeff Cohn	Study Director
NCT00326170	Guillermo Garcia-Manero, MD	Principal Investigator
NCT00338052	Herman Ellman, MD	Study Director
NCT00347672	Ruth A. Karron, MD	Principal Investigator
NCT00349596	Guillermo Garcia-Manero, MD	Principal Investigator
NCT00366431	Jeff Cohn	Study Director
NCT00366782	Ruth A. Karron, MD	Principal Investigator
NCT00380237	Ruth A. Karron, MD	Principal Investigator
NCT00382590	Guillermo Garcia-Manero, MD	Principal Investigator
NCT00387309	Jeff Cohn	Study Director
NCT00387491	Jeff Cohn	Study Director
NCT00387985	Jeff Cohn	Study Director
NCT00391807	Herman Ellman, MD	Study Director
NCT00392327	Nichole L. Bryant	Principal Investigator
NCT00398502	Jeff Cohn	Study Director
NCT00434395	Jeff Cohn	Study Director
NCT00444158	Jeff Cohn	Study Director
NCT00447811	Jeff Cohn	Study Director
NCT00464802	Jeff Cohn	Study Director
NCT00488046	Ruth A. Karron, MD	Principal Investigator
NCT00492778	Nguyet A. Le-Lindqwister	Principal Investigator
NCT00528970	Jeff Cohn	Study Director
NCT00529087	Jeff Cohn	Study Director
NCT00560638	Gail Torkildsen, MD	Principal Investigator
NCT00605644	Jeff Cohn	Study Director
NCT00641017	Ruth A. Karron, MD	Principal Investigator
NCT00712322	Herman Ellman, MD	Study Director
NCT00741234	Guillermo Garcia-Manero, MD	Principal Investigator
NCT00765804	Gail Torkildsen, MD	Principal Investigator
NCT00799552	Gail Torkildsen, MD	Principal Investigator
NCT00805090	Thomas Marbury, MD	Principal Investigator
NCT00836485	Gail Torkildsen, MD	Principal Investigator
NCT00882687	Gail Torkildsen, MD	Principal Investigator
NCT00888615	James M. Granfortuna	Principal Investigator
NCT00907803	Thomas Marbury, MD	Principal Investigator
NCT00926185	Gail Torkildsen, MD	Principal Investigator
NCT00948064	Guillermo Garcia-Manero, MD	Principal Investigator
NCT00980460	Ayman A. El-Sheikh	Principal Investigator
NCT00980460	David L. Becton	Principal Investigator
NCT00980460	Douglas J. Scothorn	Principal Investigator
NCT00980460	Gregory P. Brandt	Principal Investigator
NCT00980460	Judy L. Felgenhauer	Principal Investigator
NCT00980460	Lolie C. Yu	Principal Investigator
NCT00980460	Nichole L. Bryant	Principal Investigator
NCT00980460	Nina S. Kadan-Lottick	Principal Investigator
NCT00980460	Phillip E. Barnette	Principal Investigator
NCT00980460	Richard A. Drachtman	Principal Investigator
NCT00980460	Sara Chaffee	Principal Investigator
NCT01013649	Andrew W. Pippas	Principal Investigator
NCT01021397	Ruth A. Karron, MD	Study Chair
NCT01037218	Herman Ellman, MD	Study Director
NCT01037244	Herman Ellman, MD	Study Director
NCT01038635	Guillermo Garcia-Manero, MD	Study Chair
NCT01042522	Nguyet A. Le-Lindqwister	Principal Investigator
NCT01065012	Herman Ellman, MD	Study Director
NCT01096368	Ayman A. El-Sheikh	Principal Investigator
NCT01096368	David L. Becton	Principal Investigator
NCT01096368	Gregory P. Brandt	Principal Investigator
NCT01096368	Nichole L. Bryant	Principal Investigator
NCT01096368	Nina S. Kadan-Lottick	Principal Investigator
NCT01096368	Phillip E. Barnette	Principal Investigator
NCT01096368	Richard A. Drachtman	Principal Investigator
NCT01096368	Sara Chaffee	Principal Investigator
NCT01101451	James M. Granfortuna	Principal Investigator
NCT01131845	Thomas Marbury, MD	Principal Investigator
NCT01139437	Ruth A. Karron, MD	Principal Investigator
NCT01169337	Joshua C. Lukenbill	Principal Investigator
NCT01169337	Nguyet A. Le-Lindqwister	Principal Investigator
NCT01190930	Ayman A. El-Sheikh	Principal Investigator
NCT01190930	David L. Becton	Principal Investigator
NCT01190930	Douglas J. Scothorn	Principal Investigator
NCT01190930	Gregory P. Brandt	Principal Investigator
NCT01190930	Judy L. Felgenhauer	Principal Investigator
NCT01190930	Lolie C. Yu	Principal Investigator
NCT01190930	Nina S. Kadan-Lottick	Principal Investigator
NCT01190930	Phillip E. Barnette	Principal Investigator
NCT01190930	Richard A. Drachtman	Principal Investigator
NCT01190930	Sara Chaffee	Principal Investigator
NCT01216683	Nguyet A. Le-Lindqwister	Principal Investigator
NCT01222455	Thomas Marbury, MD	Principal Investigator
NCT01230541	Herman Ellman, MD	Study Director
NCT01240967	Thomas Marbury, MD	Principal Investigator
NCT01245790	Thomas Marbury, MD	Principal Investigator
NCT01255410	Ruth A. Karron, MD	Principal Investigator
NCT01257607	Gail Torkildsen, MD	Principal Investigator
NCT01272037	Andrew W. Pippas	Principal Investigator
NCT01272037	James M. Granfortuna	Principal Investigator
NCT01272037	Joshua C. Lukenbill	Principal Investigator
NCT01272037	Nguyet A. Le-Lindqwister	Principal Investigator
NCT01307579	Ayman A. El-Sheikh	Principal Investigator
NCT01307579	David L. Becton	Principal Investigator
NCT01307579	Douglas J. Scothorn	Principal Investigator
NCT01307579	Gregory P. Brandt	Principal Investigator
NCT01307579	Judy L. Felgenhauer	Principal Investigator
NCT01307579	Lolie C. Yu	Principal Investigator
NCT01307579	Nichole L. Bryant	Principal Investigator
NCT01307579	Nina S. Kadan-Lottick	Principal Investigator
NCT01307579	Richard A. Drachtman	Principal Investigator
NCT01307579	Sara Chaffee	Principal Investigator
NCT01349881	Nguyet A. Le-Lindqwister	Principal Investigator
NCT01371656	David L. Becton	Principal Investigator
NCT01371981	Ayman A. El-Sheikh	Principal Investigator
NCT01371981	David L. Becton	Principal Investigator
NCT01371981	Douglas J. Scothorn	Principal Investigator
NCT01371981	Gregory P. Brandt	Principal Investigator
NCT01371981	Judy L. Felgenhauer	Principal Investigator
NCT01371981	Lolie C. Yu	Principal Investigator
NCT01371981	Nichole L. Bryant	Principal Investigator
NCT01371981	Nina S. Kadan-Lottick	Principal Investigator
NCT01371981	Phillip E. Barnette	Principal Investigator
NCT01371981	Sara Chaffee	Principal Investigator
NCT01372826	Thomas Marbury, MD	Principal Investigator
NCT01387347	Gail Torkildsen, MD	Principal Investigator
NCT01392807	Thomas Marbury, MD	Principal Investigator
NCT01400776	Herman Ellman, MD	Study Director
NCT01444742	Guillermo Garcia-Manero, MD	Principal Investigator
NCT01455597	Herman Ellman, MD	Study Director
NCT01459198	Ruth A. Karron, MD	Principal Investigator
NCT01503515	Lolie C. Yu	Principal Investigator
NCT01503632	Ayman A. El-Sheikh	Principal Investigator
NCT01503632	Douglas J. Scothorn	Principal Investigator
NCT01503632	Judy L. Felgenhauer	Principal Investigator
NCT01533207	James M. Granfortuna	Principal Investigator
NCT01575548	Andrew W. Pippas	Principal Investigator
NCT01575548	Joshua C. Lukenbill	Principal Investigator
NCT01575548	Nguyet A. Le-Lindqwister	Principal Investigator
NCT01575691	Guillermo Garcia-Manero, MD	Principal Investigator
NCT01602666	Lolie C. Yu	Principal Investigator
NCT01602666	Nichole L. Bryant	Principal Investigator
NCT01602666	Nina S. Kadan-Lottick	Principal Investigator
NCT01602666	Phillip E. Barnette	Principal Investigator
NCT01628549	Herman Ellman, MD	Study Director
NCT01639846	Gail Torkildsen, MD	Principal Investigator
NCT01668719	Joshua C. Lukenbill	Principal Investigator
NCT01674140	Andrew W. Pippas	Principal Investigator
NCT01674140	James M. Granfortuna	Principal Investigator
NCT01674140	Joshua C. Lukenbill	Principal Investigator
NCT01674140	Nguyet A. Le-Lindqwister	Principal Investigator
NCT01675570	Gail Torkildsen, MD	Principal Investigator
NCT01684150	Guillermo Garcia-Manero, MD	Principal Investigator
NCT01730872	Gail Torkildsen, MD	Principal Investigator
NCT01733992	Gail Torkildsen, MD	Principal Investigator
NCT01767194	Ayman A. El-Sheikh	Principal Investigator
NCT01767194	David L. Becton	Principal Investigator
NCT01767194	Douglas J. Scothorn	Principal Investigator
NCT01767194	Gregory P. Brandt	Principal Investigator
NCT01767194	Judy L. Felgenhauer	Principal Investigator
NCT01767194	Lolie C. Yu	Principal Investigator
NCT01767194	Nina S. Kadan-Lottick	Principal Investigator
NCT01767194	Phillip E. Barnette	Principal Investigator
NCT01767194	Richard A. Drachtman	Principal Investigator
NCT01767194	Sara Chaffee	Principal Investigator
NCT01809691	Andrew W. Pippas	Principal Investigator
NCT01809691	Nguyet A. Le-Lindqwister	Principal Investigator
NCT01816139	Herman Ellman, MD	Study Director
NCT01845649	Herman Ellman, MD	Study Director
NCT01852266	Ruth A. Karron, MD	Principal Investigator
NCT01856192	Joshua C. Lukenbill	Principal Investigator
NCT01856192	Nguyet A. Le-Lindqwister	Principal Investigator
NCT01863550	James M. Granfortuna	Principal Investigator
NCT01863550	Joshua C. Lukenbill	Principal Investigator
NCT01863550	Nguyet A. Le-Lindqwister	Principal Investigator
NCT01873703	Guillermo Garcia-Manero, MD	Principal Investigator
NCT01891968	Guillermo Garcia-Manero, MD	Principal Investigator
NCT01912274	Guillermo Garcia-Manero, MD	Principal Investigator
NCT01939184	Herman Ellman, MD	Study Director
NCT01950390	Joshua C. Lukenbill	Principal Investigator
NCT01950390	Nguyet A. Le-Lindqwister	Principal Investigator
NCT01959139	James M. Granfortuna	Principal Investigator
NCT01979536	Ayman A. El-Sheikh	Principal Investigator
NCT01979536	Douglas J. Scothorn	Principal Investigator
NCT01979536	Gregory P. Brandt	Principal Investigator
NCT01979536	Judy L. Felgenhauer	Principal Investigator
NCT01979536	Nichole L. Bryant	Principal Investigator
NCT01979536	Nina S. Kadan-Lottick	Principal Investigator
NCT01979536	Phillip E. Barnette	Principal Investigator
NCT01979536	Richard A. Drachtman	Principal Investigator
NCT01979536	Sara Chaffee	Principal Investigator
NCT01993641	Guillermo Garcia-Manero, MD	Principal Investigator
NCT02017964	Lolie C. Yu	Principal Investigator
NCT02017964	Nichole L. Bryant	Principal Investigator
NCT02017964	Richard A. Drachtman	Principal Investigator
NCT02040831	Ruth A. Karron, MD	Principal Investigator
NCT02085408	Nguyet A. Le-Lindqwister	Principal Investigator
NCT02101853	Ayman A. El-Sheikh	Principal Investigator
NCT02101853	David L. Becton	Principal Investigator
NCT02101853	Douglas J. Scothorn	Principal Investigator
NCT02101853	Gregory P. Brandt	Principal Investigator
NCT02101853	Judy L. Felgenhauer	Principal Investigator
NCT02101853	Nichole L. Bryant	Principal Investigator
NCT02101853	Nina S. Kadan-Lottick	Principal Investigator
NCT02101853	Phillip E. Barnette	Principal Investigator
NCT02101853	Richard A. Drachtman	Principal Investigator
NCT02101853	Sara Chaffee	Principal Investigator
NCT02112916	Ayman A. El-Sheikh	Principal Investigator
NCT02112916	David L. Becton	Principal Investigator
NCT02112916	Douglas J. Scothorn	Principal Investigator
NCT02112916	Gregory P. Brandt	Principal Investigator
NCT02112916	Judy L. Felgenhauer	Principal Investigator
NCT02112916	Lolie C. Yu	Principal Investigator
NCT02112916	Nichole L. Bryant	Principal Investigator
NCT02112916	Nina S. Kadan-Lottick	Principal Investigator
NCT02112916	Phillip E. Barnette	Principal Investigator
NCT02112916	Richard A. Drachtman	Principal Investigator
NCT02112916	Sara Chaffee	Principal Investigator
NCT02115282	Andrew W. Pippas	Principal Investigator
NCT02115282	James M. Granfortuna	Principal Investigator
NCT02115282	Joshua C. Lukenbill	Principal Investigator
NCT02135302	Thomas Marbury, MD	Principal Investigator
NCT02152982	Andrew W. Pippas	Principal Investigator
NCT02152982	Joshua C. Lukenbill	Principal Investigator
NCT02154490	Andrew W. Pippas	Principal Investigator
NCT02154490	James M. Granfortuna	Principal Investigator
NCT02154490	Joshua C. Lukenbill	Principal Investigator
NCT02176967	David L. Becton	Principal Investigator
NCT02176967	Douglas J. Scothorn	Principal Investigator
NCT02176967	Gregory P. Brandt	Principal Investigator
NCT02176967	Judy L. Felgenhauer	Principal Investigator
NCT02176967	Lolie C. Yu	Principal Investigator
NCT02176967	Phillip E. Barnette	Principal Investigator
NCT02176967	Richard A. Drachtman	Principal Investigator
NCT02176967	Sara Chaffee	Principal Investigator
NCT02180867	Ayman A. El-Sheikh	Principal Investigator
NCT02180867	David L. Becton	Principal Investigator
NCT02180867	Douglas J. Scothorn	Principal Investigator
NCT02180867	Gregory P. Brandt	Principal Investigator
NCT02180867	Judy L. Felgenhauer	Principal Investigator
NCT02180867	Lolie C. Yu	Principal Investigator
NCT02180867	Nichole L. Bryant	Principal Investigator
NCT02180867	Nina S. Kadan-Lottick	Principal Investigator
NCT02180867	Phillip E. Barnette	Principal Investigator
NCT02180867	Richard A. Drachtman	Principal Investigator
NCT02180867	Sara Chaffee	Principal Investigator
NCT02186847	Andrew W. Pippas	Principal Investigator
NCT02193282	Andrew W. Pippas	Principal Investigator
NCT02193282	James M. Granfortuna	Principal Investigator
NCT02201992	Andrew W. Pippas	Principal Investigator
NCT02201992	James M. Granfortuna	Principal Investigator
NCT02235259	Gail Torkildsen, MD	Principal Investigator
NCT02306161	Ayman A. El-Sheikh	Principal Investigator
NCT02306161	David L. Becton	Principal Investigator
NCT02306161	Douglas J. Scothorn	Principal Investigator
NCT02306161	Gregory P. Brandt	Principal Investigator
NCT02306161	Judy L. Felgenhauer	Principal Investigator
NCT02306161	Lolie C. Yu	Principal Investigator
NCT02306161	Nichole L. Bryant	Principal Investigator
NCT02306161	Nina S. Kadan-Lottick	Principal Investigator
NCT02306161	Phillip E. Barnette	Principal Investigator
NCT02306161	Richard A. Drachtman	Principal Investigator
NCT02306161	Sara Chaffee	Principal Investigator
NCT02313103	Thomas Marbury, MD	Principal Investigator
NCT02318836	Thomas Marbury, MD	Principal Investigator
NCT02785913	Andrew W. Pippas	Principal Investigator
NCT02785913	James M. Granfortuna	Principal Investigator
NCT02785913	Joshua C. Lukenbill	Principal Investigator
NCT02785939	Andrew W. Pippas	Principal Investigator
NCT02785939	James M. Granfortuna	Principal Investigator
NCT02785939	Joshua C. Lukenbill	Principal Investigator
NCT02883049	Ayman A. El-Sheikh	Principal Investigator
NCT02883049	David L. Becton	Principal Investigator
NCT02883049	Douglas J. Scothorn	Principal Investigator
NCT02883049	Gregory P. Brandt	Principal Investigator
NCT02883049	Judy L. Felgenhauer	Principal Investigator
NCT02883049	Lolie C. Yu	Principal Investigator
NCT02883049	Nichole L. Bryant	Principal Investigator
NCT02883049	Nina S. Kadan-Lottick	Principal Investigator
NCT02883049	Phillip E. Barnette	Principal Investigator
NCT02883049	Richard A. Drachtman	Principal Investigator
NCT02883049	Sara Chaffee	Principal Investigator
NCT00315250	Danna Jennings, MD	Principal Investigator
NCT00387075	Danna Jennings, MD	Principal Investigator
NCT00397228	Danna Jennings, MD	Principal Investigator
NCT00404170	Danna Jennings, MD	Principal Investigator
NCT00439010	Danna Jennings, MD	Principal Investigator
NCT00480701	Danna Jennings, MD	Principal Investigator
NCT00492778	Benjamin T. Marchello	Principal Investigator
NCT00961116	Anthony R Godfrey, Pharm.D.	Principal Investigator
NCT00961259	Anthony R Godfrey, Pharm.D.	Principal Investigator
NCT00970333	Danna Jennings, MD	Principal Investigator
NCT00980460	Albert Kheradpour	Principal Investigator
NCT00980460	David S. Dickens	Principal Investigator
NCT00980460	Eugenia Chang	Principal Investigator
NCT00980460	Fouad M. Hajjar	Principal Investigator
NCT00980460	Iftikhar Hanif	Principal Investigator
NCT00980460	Lars M. Wagner	Principal Investigator
NCT00980460	Lisa M. McGregor	Principal Investigator
NCT00980460	Mark E. Weinblatt	Principal Investigator
NCT00980460	Mary A. Bonilla	Principal Investigator
NCT00980460	Ray C. Pais	Principal Investigator
NCT00980460	Susan G. Kreissman	Principal Investigator
NCT00980460	Vonda L. Crouse	Principal Investigator
NCT00983216	Anthony R Godfrey, Pharm.D.	Principal Investigator
NCT00983294	Anthony R Godfrey, Pharm.D.	Principal Investigator
NCT00984009	Anthony R Godfrey, Pharm.D.	Principal Investigator
NCT01017003	Anthony R Godfrey, Pharm.D.	Principal Investigator
NCT01017042	Anthony R Godfrey, Pharm.D.	Principal Investigator
NCT01018420	Anthony R Godfrey, Pharm.D.	Principal Investigator
NCT01021020	Anthony R Godfrey, Pharm.D.	Principal Investigator
NCT01096368	David S. Dickens	Principal Investigator
NCT01096368	Eugenia Chang	Principal Investigator
NCT01096368	Hadi Sawaf	Principal Investigator
NCT01096368	Iftikhar Hanif	Principal Investigator
NCT01096368	Jeffrey H. Schwartz	Principal Investigator
NCT01096368	Lisa M. McGregor	Principal Investigator
NCT01096368	Mary A. Bonilla	Principal Investigator
NCT01096368	Philip M. Monteleone	Principal Investigator
NCT01096368	Ray C. Pais	Principal Investigator
NCT01096368	Vonda L. Crouse	Principal Investigator
NCT01169337	Harvey E. Einhorn	Principal Investigator
NCT01182194	Anthony R Godfrey, Pharm.D.	Principal Investigator
NCT01182207	Anthony R Godfrey, Pharm.D.	Principal Investigator
NCT01190930	Albert Kheradpour	Principal Investigator
NCT01190930	David S. Dickens	Principal Investigator
NCT01190930	Eugenia Chang	Principal Investigator
NCT01190930	Fouad M. Hajjar	Principal Investigator
NCT01190930	Hadi Sawaf	Principal Investigator
NCT01190930	Iftikhar Hanif	Principal Investigator
NCT01190930	Jeffrey H. Schwartz	Principal Investigator
NCT01190930	Lars M. Wagner	Principal Investigator
NCT01190930	Lisa M. McGregor	Principal Investigator
NCT01190930	Mark E. Weinblatt	Principal Investigator
NCT01190930	Mary A. Bonilla	Principal Investigator
NCT01190930	Philip M. Monteleone	Principal Investigator
NCT01190930	Ray C. Pais	Principal Investigator
NCT01190930	Vonda L. Crouse	Principal Investigator
NCT01209156	Danna Jennings, MD	Principal Investigator
NCT01216683	Harvey E. Einhorn	Principal Investigator
NCT01217021	Danna Jennings, MD	Principal Investigator
NCT01268020	Danna Jennings, MD	Principal Investigator
NCT01272037	Harvey E. Einhorn	Principal Investigator
NCT01272037	Jonathan W. Friedberg	Principal Investigator
NCT01272037	Rubina Qamar	Principal Investigator
NCT01307579	David S. Dickens	Principal Investigator
NCT01307579	Eugenia Chang	Principal Investigator
NCT01307579	Fouad M. Hajjar	Principal Investigator
NCT01307579	Hadi Sawaf	Principal Investigator
NCT01307579	Iftikhar Hanif	Principal Investigator
NCT01307579	Jeffrey H. Schwartz	Principal Investigator
NCT01307579	Mark E. Weinblatt	Principal Investigator
NCT01307579	Mary A. Bonilla	Principal Investigator
NCT01307579	Philip M. Monteleone	Principal Investigator
NCT01307579	Susan G. Kreissman	Principal Investigator
NCT01307579	Vonda L. Crouse	Principal Investigator
NCT01349881	Benjamin T. Marchello	Principal Investigator
NCT01349881	Sreedhar Katragadda	Principal Investigator
NCT01371656	David S. Dickens	Principal Investigator
NCT01371656	Jeffrey H. Schwartz	Principal Investigator
NCT01371656	Philip M. Monteleone	Principal Investigator
NCT01371981	Albert Kheradpour	Principal Investigator
NCT01371981	David S. Dickens	Principal Investigator
NCT01371981	Eugenia Chang	Principal Investigator
NCT01371981	Fouad M. Hajjar	Principal Investigator
NCT01371981	Hadi Sawaf	Principal Investigator
NCT01371981	Iftikhar Hanif	Principal Investigator
NCT01371981	Jeffrey H. Schwartz	Principal Investigator
NCT01371981	Lars M. Wagner	Principal Investigator
NCT01371981	Lisa M. McGregor	Principal Investigator
NCT01371981	Mark E. Weinblatt	Principal Investigator
NCT01371981	Mary A. Bonilla	Principal Investigator
NCT01371981	Philip M. Monteleone	Principal Investigator
NCT01371981	Ray C. Pais	Principal Investigator
NCT01371981	Susan G. Kreissman	Principal Investigator
NCT01371981	Vonda L. Crouse	Principal Investigator
NCT01415752	Harvey E. Einhorn	Principal Investigator
NCT01415752	Jonathan W. Friedberg	Principal Investigator
NCT01415752	Sreedhar Katragadda	Principal Investigator
NCT01462708	Danna Jennings, MD	Principal Investigator
NCT01503515	David S. Dickens	Principal Investigator
NCT01503515	Susan G. Kreissman	Principal Investigator
NCT01503632	David S. Dickens	Principal Investigator
NCT01503632	Iftikhar Hanif	Principal Investigator
NCT01503632	Jeffrey H. Schwartz	Principal Investigator
NCT01503632	Susan G. Kreissman	Principal Investigator
NCT01575548	Benjamin T. Marchello	Principal Investigator
NCT01575548	Rubina Qamar	Principal Investigator
NCT01602666	David S. Dickens	Principal Investigator
NCT01602666	Lisa M. McGregor	Principal Investigator
NCT01602666	Ray C. Pais	Principal Investigator
NCT01602666	Susan G. Kreissman	Principal Investigator
NCT01602757	Anthony R Godfrey, Pharm.D.	Principal Investigator
NCT01668719	Jonathan W. Friedberg	Principal Investigator
NCT01668719	Sreedhar Katragadda	Principal Investigator
NCT01674140	Harvey E. Einhorn	Principal Investigator
NCT01674140	Jonathan W. Friedberg	Principal Investigator
NCT01674140	Rubina Qamar	Principal Investigator
NCT01674140	Sreedhar Katragadda	Principal Investigator
NCT01767194	Albert Kheradpour	Principal Investigator
NCT01767194	David S. Dickens	Principal Investigator
NCT01767194	Eugenia Chang	Principal Investigator
NCT01767194	Fouad M. Hajjar	Principal Investigator
NCT01767194	Hadi Sawaf	Principal Investigator
NCT01767194	Lars M. Wagner	Principal Investigator
NCT01767194	Lisa M. McGregor	Principal Investigator
NCT01767194	Mark E. Weinblatt	Principal Investigator
NCT01767194	Vonda L. Crouse	Principal Investigator
NCT01809691	Jonathan W. Friedberg	Principal Investigator
NCT01809691	Rubina Qamar	Principal Investigator
NCT01809691	Sreedhar Katragadda	Principal Investigator
NCT01822496	Harvey E. Einhorn	Principal Investigator
NCT01856192	Harvey E. Einhorn	Principal Investigator
NCT01856192	Jonathan W. Friedberg	Principal Investigator
NCT01856192	Rubina Qamar	Principal Investigator
NCT01856192	Sreedhar Katragadda	Principal Investigator
NCT01859767	Danna Jennings, MD	Principal Investigator
NCT01863550	Benjamin T. Marchello	Principal Investigator
NCT01863550	Harvey E. Einhorn	Principal Investigator
NCT01925131	Jonathan W. Friedberg	Principal Investigator
NCT01950390	Benjamin T. Marchello	Principal Investigator
NCT01950390	Harvey E. Einhorn	Principal Investigator
NCT01979536	Albert Kheradpour	Principal Investigator
NCT01979536	David S. Dickens	Principal Investigator
NCT01979536	Eugenia Chang	Principal Investigator
NCT01979536	Fouad M. Hajjar	Principal Investigator
NCT01979536	Hadi Sawaf	Principal Investigator
NCT01979536	Jeffrey H. Schwartz	Principal Investigator
NCT01979536	Lars M. Wagner	Principal Investigator
NCT01979536	Lisa M. McGregor	Principal Investigator
NCT01979536	Mark E. Weinblatt	Principal Investigator
NCT01979536	Mary A. Bonilla	Principal Investigator
NCT01979536	Philip M. Monteleone	Principal Investigator
NCT01979536	Ray C. Pais	Principal Investigator
NCT01979536	Susan G. Kreissman	Principal Investigator
NCT01979536	Vonda L. Crouse	Principal Investigator
NCT02003222	Jonathan W. Friedberg	Principal Investigator
NCT02017964	Albert Kheradpour	Principal Investigator
NCT02017964	David S. Dickens	Principal Investigator
NCT02017964	Fouad M. Hajjar	Principal Investigator
NCT02017964	Jeffrey H. Schwartz	Principal Investigator
NCT02017964	Lars M. Wagner	Principal Investigator
NCT02017964	Lisa M. McGregor	Principal Investigator
NCT02085408	Jonathan W. Friedberg	Principal Investigator
NCT02085408	Rubina Qamar	Principal Investigator
NCT02101853	Albert Kheradpour	Principal Investigator
NCT02101853	Eugenia Chang	Principal Investigator
NCT02101853	Fouad M. Hajjar	Principal Investigator
NCT02101853	Hadi Sawaf	Principal Investigator
NCT02101853	Iftikhar Hanif	Principal Investigator
NCT02101853	Jeffrey H. Schwartz	Principal Investigator
NCT02101853	Lars M. Wagner	Principal Investigator
NCT02101853	Mark E. Weinblatt	Principal Investigator
NCT02101853	Mary A. Bonilla	Principal Investigator
NCT02101853	Philip M. Monteleone	Principal Investigator
NCT02101853	Ray C. Pais	Principal Investigator
NCT02101853	Susan G. Kreissman	Principal Investigator
NCT02112916	Albert Kheradpour	Principal Investigator
NCT02112916	Eugenia Chang	Principal Investigator
NCT02112916	Fouad M. Hajjar	Principal Investigator
NCT02112916	Hadi Sawaf	Principal Investigator
NCT02112916	Iftikhar Hanif	Principal Investigator
NCT02112916	Jeffrey H. Schwartz	Principal Investigator
NCT02112916	Lars M. Wagner	Principal Investigator
NCT02112916	Lisa M. McGregor	Principal Investigator
NCT02112916	Mark E. Weinblatt	Principal Investigator
NCT02112916	Mary A. Bonilla	Principal Investigator
NCT02112916	Philip M. Monteleone	Principal Investigator
NCT02112916	Ray C. Pais	Principal Investigator
NCT02112916	Susan G. Kreissman	Principal Investigator
NCT02112916	Vonda L. Crouse	Principal Investigator
NCT02115282	Harvey E. Einhorn	Principal Investigator
NCT02115282	Rubina Qamar	Principal Investigator
NCT02115282	Sreedhar Katragadda	Principal Investigator
NCT02134912	Benjamin T. Marchello	Principal Investigator
NCT02154490	Benjamin T. Marchello	Principal Investigator
NCT02154490	Rubina Qamar	Principal Investigator
NCT02154490	Sreedhar Katragadda	Principal Investigator
NCT02176967	Albert Kheradpour	Principal Investigator
NCT02176967	Hadi Sawaf	Principal Investigator
NCT02176967	Iftikhar Hanif	Principal Investigator
NCT02176967	Jeffrey H. Schwartz	Principal Investigator
NCT02176967	Lars M. Wagner	Principal Investigator
NCT02176967	Mark E. Weinblatt	Principal Investigator
NCT02176967	Mary A. Bonilla	Principal Investigator
NCT02176967	Philip M. Monteleone	Principal Investigator
NCT02176967	Ray C. Pais	Principal Investigator
NCT02176967	Susan G. Kreissman	Principal Investigator
NCT02176967	Vonda L. Crouse	Principal Investigator
NCT02177695	Benjamin T. Marchello	Principal Investigator
NCT02177695	Jonathan W. Friedberg	Principal Investigator
NCT02180867	Albert Kheradpour	Principal Investigator
NCT02180867	Eugenia Chang	Principal Investigator
NCT02180867	Fouad M. Hajjar	Principal Investigator
NCT02180867	Hadi Sawaf	Principal Investigator
NCT02180867	Iftikhar Hanif	Principal Investigator
NCT02180867	Lars M. Wagner	Principal Investigator
NCT02180867	Lisa M. McGregor	Principal Investigator
NCT02180867	Mark E. Weinblatt	Principal Investigator
NCT02180867	Mary A. Bonilla	Principal Investigator
NCT02180867	Philip M. Monteleone	Principal Investigator
NCT02180867	Ray C. Pais	Principal Investigator
NCT02180867	Susan G. Kreissman	Principal Investigator
NCT02180867	Vonda L. Crouse	Principal Investigator
NCT02186847	Rubina Qamar	Principal Investigator
NCT02193282	Benjamin T. Marchello	Principal Investigator
NCT02193282	Harvey E. Einhorn	Principal Investigator
NCT02193282	Rubina Qamar	Principal Investigator
NCT02193282	Sreedhar Katragadda	Principal Investigator
NCT02201992	Benjamin T. Marchello	Principal Investigator
NCT02201992	Harvey E. Einhorn	Principal Investigator
NCT02201992	Sreedhar Katragadda	Principal Investigator
NCT02306161	Albert Kheradpour	Principal Investigator
NCT02306161	Eugenia Chang	Principal Investigator
NCT02306161	Fouad M. Hajjar	Principal Investigator
NCT02306161	Hadi Sawaf	Principal Investigator
NCT02306161	Iftikhar Hanif	Principal Investigator
NCT02306161	Lars M. Wagner	Principal Investigator
NCT02306161	Lisa M. McGregor	Principal Investigator
NCT02306161	Mark E. Weinblatt	Principal Investigator
NCT02306161	Mary A. Bonilla	Principal Investigator
NCT02306161	Philip M. Monteleone	Principal Investigator
NCT02306161	Ray C. Pais	Principal Investigator
NCT02306161	Susan G. Kreissman	Principal Investigator
NCT02306161	Vonda L. Crouse	Principal Investigator
NCT02785913	Benjamin T. Marchello	Principal Investigator
NCT02785913	Jonathan W. Friedberg	Principal Investigator
NCT02785913	Rubina Qamar	Principal Investigator
NCT02785913	Sreedhar Katragadda	Principal Investigator
NCT02785939	Benjamin T. Marchello	Principal Investigator
NCT02785939	Jonathan W. Friedberg	Principal Investigator
NCT02785939	Rubina Qamar	Principal Investigator
NCT02785939	Sreedhar Katragadda	Principal Investigator
NCT02883049	Albert Kheradpour	Principal Investigator
NCT02883049	Eugenia Chang	Principal Investigator
NCT02883049	Fouad M. Hajjar	Principal Investigator
NCT02883049	Hadi Sawaf	Principal Investigator
NCT02883049	Iftikhar Hanif	Principal Investigator
NCT02883049	Jeffrey H. Schwartz	Principal Investigator
NCT02883049	Lars M. Wagner	Principal Investigator
NCT02883049	Lisa M. McGregor	Principal Investigator
NCT02883049	Mark E. Weinblatt	Principal Investigator
NCT02883049	Mary A. Bonilla	Principal Investigator
NCT02883049	Philip M. Monteleone	Principal Investigator
NCT02883049	Ray C. Pais	Principal Investigator
NCT02883049	Vonda L. Crouse	Principal Investigator
NCT00224874	Mary Horowitz, MD	Study Director
NCT00326417	Mary Horowitz, MD	Study Director
NCT00329030	Mary Horowitz, MD	Study Director
NCT00397254	Roger K Cady, MD	Principal Investigator
NCT00406393	Mary Horowitz, MD	Study Director
NCT00421174	Mary Horowitz, MD	Study Director
NCT00492778	James T. Thigpen	Principal Investigator
NCT00492778	Robert S. Mannel	Principal Investigator
NCT00565851	Asheesh Shipstone	Principal Investigator
NCT00565851	James T. Thigpen	Principal Investigator
NCT00565851	Robert S. Mannel	Principal Investigator
NCT00610428	Roger K Cady, MD	Principal Investigator
NCT00651820	Herbert B Slade, MD	Study Director
NCT00679523	Karl Beutner, MD, PhD	Study Director
NCT00679601	Karl Beutner, MD, PhD	Study Director
NCT00679770	Karl Beutner, MD, PhD	Study Director
NCT00679965	Karl Beutner, MD, PhD	Study Director
NCT00680095	Karl Beutner, MD, PhD	Study Director
NCT00680134	Karl Beutner, MD, PhD	Study Director
NCT00680160	Karl Beutner, MD, PhD	Study Director
NCT00745420	Mary Horowitz, MD	Study Director
NCT00759161	Karl Beutner, MD, PhD	Study Director
NCT00762658	Karl Beutner, MD, PhD	Study Director
NCT00763204	Karl Beutner, MD, PhD	Study Director
NCT00846495	Roger K Cady, MD	Principal Investigator
NCT00852995	Herbert B Slade, MD	Study Chair
[truncated: 46,315 more rows]

## Sheet: 31962
nct_number	last_name	role	surname
NCT00045968	linda liau	Principal Investigator	liau
NCT00045968	marnix l. bosch	Study Director	bosch
NCT00062868	helen e heslop	Principal Investigator	heslop
NCT00072982	robert b zurier	Principal Investigator	zurier
NCT00079417	debra friedman	Principal Investigator	friedman
NCT00081263	janet rader	Principal Investigator	rader
NCT00083083	mitchell machtay	Study Chair	machtay
NCT00085098	jeffrey c. allen	Study Chair	allen
NCT00098787	jean l. grem	Study Chair	grem
NCT00098787	neal j. meropol	Study Chair	meropol
NCT00098839	elizabeth raetz	Principal Investigator	raetz
NCT00099086	david marshall	Principal Investigator	marshall
NCT00100061	lynn stothers	Principal Investigator	stothers
NCT00100802	regina jakacki	Study Chair	jakacki
NCT00102908	jeannie s. huang	Principal Investigator	huang
NCT00103285	kelly maloney	Principal Investigator	maloney
NCT00104923	ann mohrbacher	Study Chair	mohrbacher
NCT00108745	larry copeland	Principal Investigator	copeland
NCT00114140	barbara j. fisher	Principal Investigator	fisher
NCT00114140	david r. macdonald	Study Chair	macdonald
NCT00114140	glenn j. lesser	Study Chair	lesser
NCT00114140	stephen w. coons	Study Chair	coons
NCT00114231	julio garcia-aguilar	Study Chair	garcia-aguilar
NCT00114738	wyndham h wilson	Principal Investigator	wilson
NCT00115778	selim m arcasoy	Principal Investigator	arcasoy
NCT00116142	anthony v. d'amico	Principal Investigator	d'amico
NCT00117936	nabil dib	Principal Investigator	dib
NCT00118209	andrew d. zelenetz	Study Chair	zelenetz
NCT00118209	wyndham h. wilson	Study Chair	wilson
NCT00118274	craig l. slingluff	Principal Investigator	slingluff
NCT00118352	brenda sandmaier	Principal Investigator	sandmaier
NCT00121251	scott tagawa	Principal Investigator	tagawa
NCT00122005	bernard fox	Principal Investigator	fox
NCT00126581	pasi janne	Principal Investigator	janne
NCT00126672	sandra dabora	Study Chair	dabora
NCT00127205	alexander h paterson	Study Chair	paterson
NCT00127205	carla i. falkson	Study Chair	falkson
NCT00127205	elizabeth c. dees	Study Chair	dees
NCT00127205	james n. ingle	Study Chair	ingle
NCT00127205	julie r. gralow	Study Chair	gralow
NCT00127205	mark j. clemons	Study Chair	clemons
NCT00127205	robert b. livingston	Study Chair	livingston
NCT00129740	jorge cortes	Principal Investigator	cortes
NCT00130117	christos s mantzoros	Principal Investigator	mantzoros
NCT00132301	bruce montgomery	Study Chair	montgomery
NCT00132301	daniel lin	Study Chair	lin
NCT00132743	don cutlip	Principal Investigator	cutlip
NCT00132743	timothy murphy	Principal Investigator	murphy
NCT00134030	neyssa marina	Principal Investigator	marina
NCT00134056	david i. quinn	Study Chair	quinn
NCT00134056	maha hadi a. hussain	Study Chair	hussain
NCT00134056	mark garzotto	Study Chair	garzotto
NCT00134056	primo n. lara	Study Chair	lara
NCT00134082	richard ambinder	Study Chair	ambinder
NCT00135200	mark kaminski	Principal Investigator	kaminski
NCT00142519	natalia moryl	Principal Investigator	moryl
NCT00147914	jacquelynne corey	Principal Investigator	corey
NCT00151203	ruben niesvizky	Principal Investigator	niesvizky
NCT00154180	dennis m black	Principal Investigator	black
NCT00154180	frederick naftolin	Study Director	naftolin
NCT00154180	howard hodis	Principal Investigator	hodis
NCT00154180	matthew budoff	Principal Investigator	budoff
NCT00154180	michael mendelsohn	Principal Investigator	mendelsohn
NCT00154180	s mitchell harman	Study Director	harman
NCT00154180	sanjay asthana	Principal Investigator	asthana
NCT00174525	daniel e. grosz	Principal Investigator	grosz
NCT00175123	bettina jorgensen	Principal Investigator	jorgensen
NCT00179998	robert g castile	Principal Investigator	castile
NCT00182715	timothy maughan	Study Chair	maughan
NCT00183872	syma iqbal	Principal Investigator	iqbal
NCT00184015	david quinn	Principal Investigator	quinn
NCT00185731	dean felsher	Principal Investigator	felsher
NCT00186888	ibrahim qaddoumi	Principal Investigator	qaddoumi
NCT00195624	danielle m townsley	Principal Investigator	townsley
NCT00200161	lisa deangelis	Principal Investigator	deangelis
NCT00201760	kari kendra	Principal Investigator	kendra
NCT00203411	arash naeim	Study Chair	naeim
NCT00203411	randy hecht	Study Chair	hecht
NCT00205504	john e nestler	Study Director	nestler
NCT00205504	kai i cheang	Principal Investigator	cheang
NCT00214747	kurt barnhart	Principal Investigator	barnhart
NCT00214838	donald picker	Study Director	picker
NCT00216242	nancy bouveret	Study Director	bouveret
NCT00217594	christopher s hourigan	Principal Investigator	hourigan
NCT00217737	al benson	Principal Investigator	benson
NCT00217763	pr. bruno vellas	Principal Investigator	vellas
NCT00225537	anastacio m hoyumpa	Principal Investigator	hoyumpa
NCT00225537	charles t leach	Principal Investigator	leach
NCT00225537	dubravko pavlin	Study Director	pavlin
NCT00227019	heather a. wakelee	Principal Investigator	wakelee
NCT00227461	a.m. barrett	Principal Investigator	barrett
NCT00227617	emily k. bergsland	Principal Investigator	bergsland
NCT00232505	lisa a. carey	Principal Investigator	carey
NCT00233324	abbot r. laptook	Principal Investigator	laptook
NCT00233324	abhik das	Principal Investigator	das
NCT00233324	barbara j. stoll	Principal Investigator	stoll
NCT00233324	brenda b. poindexter	Principal Investigator	poindexter
NCT00233324	edward f. bell	Principal Investigator	bell
NCT00233324	ivan d. frantz iii	Principal Investigator	iii
NCT00233324	kathleen a. kennedy	Principal Investigator	kennedy
NCT00233324	krisa p. van meurs	Principal Investigator	meurs
NCT00233324	kristi l. watterberg	Principal Investigator	watterberg
NCT00233324	kurt schibler	Principal Investigator	schibler
NCT00233324	michele c. walsh	Principal Investigator	walsh
NCT00233324	neil n. finer	Principal Investigator	finer
NCT00233324	pablo j. sanchez	Principal Investigator	sanchez
NCT00233324	richard a. ehrenkranz	Principal Investigator	ehrenkranz
NCT00233324	roger g. faix	Principal Investigator	faix
NCT00233324	ronald n. goldberg	Principal Investigator	goldberg
NCT00233324	seetha shankaran	Principal Investigator	shankaran
NCT00233324	waldemar a. carlo	Principal Investigator	carlo
NCT00233454	jason robert gotlib	Principal Investigator	gotlib
NCT00233987	eileen p. smith	Study Chair	smith
NCT00233987	louis s. constine	Study Chair	constine
NCT00233987	patrick j. stiff	Study Chair	stiff
NCT00234052	jyoti d. patel	Study Chair	patel
NCT00234312	joshua boverman	Principal Investigator	boverman
NCT00235053	eli o meltzer	Principal Investigator	meltzer
NCT00237068	benjamin d. gold	Principal Investigator	gold
NCT00237523	julia kazakhin	Study Director	kazakhin
NCT00238238	john p. leonard	Study Chair	leonard
NCT00238433	richard maziarz	Study Chair	maziarz
NCT00239746	john breitner	Principal Investigator	breitner
NCT00242593	suzanne craft	Principal Investigator	craft
NCT00244972	david hong	Principal Investigator	hong
NCT00247520	wynne h weston-davies	Study Director	weston-davies
NCT00247624	w. vaughn mccall	Principal Investigator	mccall
NCT00248287	joyce a. o'shaughnessy	Principal Investigator	o'shaughnessy
NCT00248495	grace k. dy	Principal Investigator	dy
NCT00248521	ian r. judson	Study Chair	judson
NCT00249691	bankole johnson	Principal Investigator	johnson
NCT00254410	william g. wierda	Principal Investigator	wierda
NCT00254592	rita mehta	Principal Investigator	mehta
NCT00255346	hagop m kantarjian	Principal Investigator	kantarjian
NCT00255801	david j. straus	Principal Investigator	straus
NCT00255801	patricia l. myskowski	Principal Investigator	myskowski
NCT00255801	steven m. horwitz	Principal Investigator	horwitz
NCT00256308	ignatius ou	Principal Investigator	ou
NCT00258687	f. stephen hodi	Principal Investigator	hodi
NCT00262067	leonardo faoro	Study Director	faoro
NCT00263341	ruth merkatz	Study Director	merkatz
NCT00265278	reese jones	Principal Investigator	jones
NCT00265759	matthew j. ellis	Study Chair	ellis
NCT00265798	hedy kindler	Principal Investigator	kindler
NCT00265850	alan venook	Study Chair	venook
NCT00265941	david rosenthal	Principal Investigator	rosenthal
NCT00265941	phuc felix nguyen-tan	Study Chair	nguyen-tan
NCT00266110	jonathan s. serody	Principal Investigator	serody
NCT00268385	patrick wen	Principal Investigator	wen
NCT00270959	douglas f. zatzick	Principal Investigator	zatzick
NCT00271505	william n. william jr.	Principal Investigator	jr.
NCT00274924	lode j. swinnen	Study Chair	swinnen
NCT00274937	carlos rodriguez-galindo	Principal Investigator	rodriguez-galindo
NCT00274950	juliet hale	Principal Investigator	hale
NCT00275067	jeffrey raizer	Principal Investigator	raizer
NCT00276705	bruce morland	Study Chair	morland
NCT00276783	jeffrey j. raizer	Study Chair	raizer
NCT00278148	nathan pennell	Study Chair	pennell
NCT00278343	holger hirte	Principal Investigator	hirte
NCT00278538	richard burt	Principal Investigator	burt
NCT00282100	alex chang	Principal Investigator	chang
NCT00287287	kenneth b ain	Principal Investigator	ain
NCT00287924	martin w. english	Study Chair	english
NCT00288015	mark agulnik	Principal Investigator	agulnik
NCT00288080	howard m. sandler	Principal Investigator	sandler
NCT00288080	kenneth j. pienta	Study Chair	pienta
NCT00288080	leonard g. gomella	Study Chair	gomella
NCT00288080	seth rosenthal	Study Chair	rosenthal
NCT00288093	tanios bekaii-saab	Principal Investigator	bekaii-saab
NCT00288873	emily m stein	Principal Investigator	stein
NCT00290498	luis e. fayad	Principal Investigator	fayad
NCT00293501	deborah l. ornstein	Study Chair	ornstein
NCT00294658	gary cutter	Principal Investigator	cutter
NCT00294658	gil wolfe	Principal Investigator	wolfe
NCT00295373	michael g flynn	Study Director	flynn
NCT00295373	robert e hannemann	Principal Investigator	hannemann
NCT00295841	bayard l. powell	Study Chair	powell
NCT00295893	george somlo	Principal Investigator	somlo
NCT00295932	john f. gerecitano	Study Chair	gerecitano
NCT00298155	peter s. nelson	Principal Investigator	nelson
NCT00298155	r. bruce montgomery	Principal Investigator	montgomery
NCT00299962	daniel h. sterman	Principal Investigator	sterman
NCT00300807	john andrews	Study Director	andrews
NCT00301067	timothy m. kuzel	Study Chair	kuzel
NCT00301093	martha wadleigh	Principal Investigator	wadleigh
NCT00301756	amit oza	Principal Investigator	oza
NCT00301925	david cameron	Study Chair	cameron
NCT00302003	frank keller	Principal Investigator	keller
NCT00304031	mark r. gilbert	Principal Investigator	gilbert
NCT00304031	minesh p. mehta	Study Chair	mehta
NCT00304031	roger stupp	Study Chair	stupp
NCT00307151	avy violari	Study Chair	violari
NCT00307151	paul palumbo	Study Chair	palumbo
NCT00309907	gregory yanik	Principal Investigator	yanik
NCT00309985	christopher sweeney	Study Chair	sweeney
NCT00310037	lawrence d. kaplan	Study Chair	kaplan
NCT00310180	joseph sparano	Principal Investigator	sparano
NCT00311805	douglas w. losordo	Principal Investigator	losordo
NCT00313586	steven gore	Principal Investigator	gore
NCT00314366	emerson perin	Principal Investigator	perin
NCT00314925	rudin charles	Study Chair	charles
NCT00315341	andrew saxon	Principal Investigator	saxon
NCT00315341	walter ling	Principal Investigator	ling
NCT00315627	rodolfo alejandro	Principal Investigator	alejandro
NCT00316862	david h. ilson	Study Chair	ilson
NCT00316888	joseph a. sparano	Study Chair	sparano
NCT00316888	madhur k. garg	Study Chair	garg
NCT00317603	beth overmoyer	Principal Investigator	overmoyer
NCT00318383	matt hohenboken	Study Director	hohenboken
NCT00319839	s.-h. ignatius ou	Principal Investigator	ou
NCT00321685	jerome landry	Principal Investigator	landry
NCT00322023	daniel c. javitt	Principal Investigator	javitt
NCT00322309	maryam afshar	Principal Investigator	afshar
NCT00323063	deborah r. toppmeyer	Principal Investigator	toppmeyer
NCT00324805	heather wakelee	Principal Investigator	wakelee
NCT00325182	ofra sarid-segal	Principal Investigator	sarid-segal
NCT00325286	sriram ramaswamy	Principal Investigator	ramaswamy
NCT00326872	dusica babovic-vuksanovic	Principal Investigator	babovic-vuksanovic
NCT00329043	amado zurita	Principal Investigator	zurita
NCT00329719	kurt jaeckle	Principal Investigator	jaeckle
NCT00331162	alan c farney	Principal Investigator	farney
NCT00331630	virginia g. kaklamani	Principal Investigator	kaklamani
NCT00331760	anuja jhingran	Study Chair	jhingran
NCT00334672	vasanta nanduri	Study Chair	nanduri
NCT00334737	adam rosenberg	Principal Investigator	rosenberg
NCT00334737	robert d christensen	Principal Investigator	christensen
NCT00334737	robin k ohls	Principal Investigator	ohls
NCT00334737	susan wiedmeier	Principal Investigator	wiedmeier
NCT00334789	thehang luu	Principal Investigator	luu
NCT00335868	ronald paquette	Study Chair	paquette
NCT00336024	claire mazewski	Principal Investigator	mazewski
NCT00336063	wen-son hsieh	Principal Investigator	hsieh
NCT00336947	mamoru tsukuda	Study Chair	tsukuda
NCT00346164	sheri spunt	Principal Investigator	spunt
NCT00347828	michael b raizman	Principal Investigator	raizman
NCT00347828	rahul mandiga	Study Director	mandiga
NCT00347828	sandra y cho	Study Director	cho
NCT00348816	gregory p. swanson	Study Chair	swanson
NCT00348946	judith l. ross	Principal Investigator	ross
NCT00350701	paresh dandona	Principal Investigator	dandona
NCT00351299	gerald l weinhouse	Principal Investigator	weinhouse
NCT00352027	monika metzger	Principal Investigator	metzger
NCT00352794	srdan verstovsek	Principal Investigator	verstovsek
NCT00354744	brenda weigel	Study Chair	weigel
NCT00354744	carola a arndt	Study Chair	arndt
NCT00354835	douglas hawkins	Principal Investigator	hawkins
NCT00357448	lupe salazar	Principal Investigator	salazar
NCT00357877	athena papas	Principal Investigator	papas
NCT00358163	pankaj bhargava	Principal Investigator	bhargava
NCT00361244	andrew x. zhu	Principal Investigator	zhu
NCT00361296	b. douglas smith	Principal Investigator	smith
NCT00364390	bartley p griffith	Principal Investigator	griffith
NCT00364390	george tellides	Principal Investigator	tellides
NCT00364598	kenneth b margulies	Principal Investigator	margulies
NCT00364598	y. joseph woo	Principal Investigator	woo
NCT00365105	michael j. seider	Study Chair	seider
NCT00369317	jeffrey taub	Principal Investigator	taub
NCT00369707	andrew m. evens	Principal Investigator	evens
NCT00371033	john kusek	Study Director	kusek
NCT00371033	lee nyberg	Study Director	nyberg
NCT00372515	bruce johnson	Principal Investigator	johnson
NCT00372593	alan s. gamis	Study Chair	gamis
NCT00372593	richard aplenc	Study Chair	aplenc
NCT00372619	bassem i. razzouk	Study Chair	razzouk
NCT00372619	todd cooper	Study Chair	cooper
NCT00372905	jane winter	Principal Investigator	winter
NCT00376688	gini fleming	Principal Investigator	fleming
NCT00376961	richard i. fisher	Study Chair	fisher
NCT00376961	steven h. bernstein	Study Chair	bernstein
NCT00378105	paul richardson	Principal Investigator	richardson
NCT00378703	keith flaherty	Principal Investigator	flaherty
NCT00379340	david dix	Principal Investigator	dix
NCT00380029	raj s. pruthi	Principal Investigator	pruthi
NCT00380679	daniel fishbein	Principal Investigator	fishbein
NCT00380679	william m cassidy	Principal Investigator	cassidy
NCT00381108	leland ronningen	Principal Investigator	ronningen
NCT00381641	jonas de souza	Principal Investigator	souza
NCT00381680	glen lew	Principal Investigator	lew
NCT00381797	sridharan gururangan	Principal Investigator	gururangan
NCT00382018	daniel f. hayes	Study Chair	hayes
NCT00382018	eric p. winer	Study Chair	winer
NCT00382018	jeffrey b. smerage	Study Chair	smerage
NCT00382070	norman wolmark	Principal Investigator	wolmark
NCT00382109	michael pulsipher	Principal Investigator	pulsipher
NCT00382200	virginia klimek	Study Chair	klimek
NCT00383851	gilad gordon	Study Director	gordon
NCT00383994	issa f. khouri	Principal Investigator	khouri
NCT00384176	jane robertson	Study Director	robertson
NCT00385502	michael h. silverman	Study Director	silverman
NCT00387075	danna jennings	Principal Investigator	jennings
NCT00387530	william l. read	Study Chair	read
NCT00389038	scott w. powers	Principal Investigator	powers
NCT00389610	daniel a. laheru	Principal Investigator	laheru
NCT00390000	julian molina	Principal Investigator	molina
NCT00390325	manisha shah	Principal Investigator	shah
NCT00390455	harold burstein	Principal Investigator	burstein
NCT00390767	sam l teichman	Study Director	teichman
NCT00390793	farhad ravandi-kashani	Principal Investigator	ravandi-kashani
NCT00392015	cindy tamminga	Principal Investigator	tamminga
NCT00392054	carlos a morillo	Principal Investigator	morillo
NCT00392054	natale andrea	Principal Investigator	andrea
NCT00392340	guy makin	Study Chair	makin
NCT00392353	lewis silverman	Principal Investigator	silverman
NCT00392951	david t. teachey	Principal Investigator	teachey
NCT00392990	leo gordon	Principal Investigator	gordon
NCT00393783	teresa gilewski	Principal Investigator	gilewski
NCT00394433	peter enzinger	Principal Investigator	enzinger
NCT00395538	rachel i gafni	Principal Investigator	gafni
NCT00396019	jean tersak	Principal Investigator	tersak
NCT00397579	arthur e. frankel	Principal Investigator	frankel
NCT00397917	jeffrey murray	Principal Investigator	murray
NCT00398450	gregory a. daniels	Principal Investigator	daniels
NCT00400374	dong shin	Principal Investigator	shin
NCT00400816	david m. peereboom	Study Chair	peereboom
NCT00400946	lewis b. silverman	Principal Investigator	silverman
NCT00401817	john p leonard	Principal Investigator	leonard
NCT00402779	vassiliki papadimitrakopoulou	Principal Investigator	papadimitrakopoulou
NCT00404417	kevin r cannard	Principal Investigator	cannard
NCT00405327	james d geiger	Principal Investigator	geiger
NCT00405587	henry hsu	Study Director	hsu
NCT00406809	mack mabry	Study Director	mabry
NCT00407381	diana do	Principal Investigator	do
NCT00408005	stuart winter	Principal Investigator	winter
NCT00408499	david r. gandara	Study Chair	gandara
NCT00409383	anna c pavlick	Principal Investigator	pavlick
NCT00410462	hans gelderblom	Study Chair	gelderblom
NCT00410553	rakesh goel	Principal Investigator	goel
NCT00410605	natalie callander	Principal Investigator	callander
NCT00410813	anne f. schott	Study Chair	schott
NCT00410813	catherine van poznak	Study Chair	poznak
NCT00410956	william r. jarnagin	Principal Investigator	jarnagin
NCT00411086	nathan fowler	Principal Investigator	fowler
NCT00411723	christopher bever	Principal Investigator	bever
NCT00411723	david mattson	Principal Investigator	mattson
NCT00411723	jana preiningerova	Principal Investigator	preiningerova
NCT00411723	sharon lynch	Principal Investigator	lynch
NCT00411723	theodore r brown	Principal Investigator	brown
NCT00411723	vijayshree yadav	Principal Investigator	yadav
NCT00414076	robert coleman	Principal Investigator	coleman
NCT00414648	bruce trapnell	Principal Investigator	trapnell
NCT00414648	frank mccormack	Principal Investigator	mccormack
NCT00416455	mostafa atri	Principal Investigator	atri
NCT00416598	william blum	Principal Investigator	blum
NCT00417560	carolyn bridges	Principal Investigator	bridges
NCT00417794	laura j mcguinn	Principal Investigator	mcguinn
NCT00418496	j. paul monk	Principal Investigator	monk
NCT00419562	jay skyler	Study Chair	skyler
NCT00419562	jeff krischer	Principal Investigator	krischer
NCT00422799	irene ghobrial	Principal Investigator	ghobrial
NCT00423293	lisa a. kachnic	Study Chair	kachnic
NCT00423514	farid boulad	Principal Investigator	boulad
NCT00423735	andrew lassman	Principal Investigator	lassman
NCT00423917	winston tan	Study Chair	tan
NCT00424164	pierre fumoleau	Study Chair	fumoleau
NCT00425607	mark w kieran	Study Chair	kieran
NCT00425802	craig moskowitz	Principal Investigator	moskowitz
NCT00425802	hugo r. castro-malaspina	Principal Investigator	castro-malaspina
NCT00425802	juliet barker	Principal Investigator	barker
NCT00426764	kenichi takeshita	Study Director	takeshita
NCT00428298	jennifer l payne	Principal Investigator	payne
NCT00428922	bhuvaneswari ramaswamy	Principal Investigator	ramaswamy
NCT00430183	james eastham	Study Chair	eastham
NCT00433511	kathy miller	Principal Investigator	miller
NCT00433550	robert mcwilliams	Study Chair	mcwilliams
NCT00436267	kenneth l. pennington	Study Chair	pennington
NCT00436332	howard l. west	Study Chair	west
NCT00436852	elizabeth fox	Principal Investigator	fox
NCT00438256	theodore hong	Principal Investigator	hong
NCT00438802	thomas e. witzig	Study Chair	witzig
NCT00438841	william i. bensinger	Principal Investigator	bensinger
NCT00439465	kenneth meehan	Principal Investigator	meehan
NCT00439972	robert h knopp	Principal Investigator	knopp
NCT00441142	patrick y wen	Principal Investigator	wen
NCT00442130	catherine j. wu	Principal Investigator	wu
NCT00442533	ebrahim delpassand	Principal Investigator	delpassand
NCT00445692	leona holmberg	Principal Investigator	holmberg
NCT00445887	gus rodriguez	Study Chair	rodriguez
NCT00448357	thomas c. shea	Principal Investigator	shea
NCT00448734	robert earhart	Study Director	earhart
NCT00449007	maria a. oquendo	Principal Investigator	oquendo
NCT00449657	paul walker	Principal Investigator	walker
NCT00450398	stefan hemmerich	Study Director	hemmerich
NCT00450450	stephan a. grupp	Principal Investigator	grupp
NCT00450463	ravi a madan	Principal Investigator	madan
NCT00453154	neal ready	Principal Investigator	ready
NCT00453388	hans-peter kiem	Principal Investigator	kiem
NCT00454168	craig s. rosenfeld	Study Chair	rosenfeld
NCT00454389	jeffrey a nau	Study Director	nau
NCT00454389	pravin dugel	Principal Investigator	dugel
NCT00455312	jakub tolar	Principal Investigator	tolar
NCT00455325	clay f. semenkovich	Principal Investigator	semenkovich
NCT00455689	hadine joffe	Principal Investigator	joffe
NCT00457639	abhimanyu garg	Principal Investigator	garg
NCT00457769	anna m barrett	Principal Investigator	barrett
NCT00458653	david avigan	Principal Investigator	avigan
NCT00460031	jorge garcia	Principal Investigator	garcia
NCT00460031	matthew m. cooney	Principal Investigator	cooney
NCT00460174	william small	Study Chair	small
NCT00460239	eric c strain	Principal Investigator	strain
NCT00461045	steven d reich	Study Director	reich
NCT00464620	scott schuetze	Principal Investigator	schuetze
NCT00464711	dan iosifescu	Principal Investigator	iosifescu
NCT00465491	dr. hazel breitz	Study Director	breitz
NCT00466661	bryan k tolliver	Principal Investigator	tolliver
NCT00466661	kathleen t brady	Study Director	brady
NCT00466895	leslie andritsos	Principal Investigator	andritsos
NCT00468117	james f. markmann	Principal Investigator	markmann
NCT00468169	everett e vokes	Principal Investigator	vokes
NCT00468715	tiffany a. traina	Principal Investigator	traina
NCT00468910	hemant roy	Principal Investigator	roy
NCT00469859	donald small	Study Chair	small
NCT00469859	patrick a. brown	Study Chair	brown
NCT00470015	svetomir markovic	Study Chair	markovic
NCT00470496	hassan arshad	Principal Investigator	arshad
NCT00470704	nancy lin	Principal Investigator	lin
NCT00474747	paolo anderlini	Principal Investigator	anderlini
NCT00474929	shaji k. kumar	Principal Investigator	kumar
NCT00475020	uday popat	Principal Investigator	popat
NCT00476190	daniel deangelo	Principal Investigator	deangelo
NCT00477412	michael wang	Principal Investigator	wang
NCT00477750	craig b. reeder	Principal Investigator	reeder
NCT00477750	philip r. greipp	Principal Investigator	greipp
NCT00477750	vivek roy	Study Chair	roy
NCT00477815	angela dispenzieri	Study Chair	dispenzieri
NCT00478465	jose g montoya	Principal Investigator	montoya
NCT00479128	arlene siefker-radtke	Principal Investigator	siefker-radtke
NCT00481832	wen-kai weng	Principal Investigator	weng
NCT00482092	priya raina	Study Director	raina
NCT00482950	hans-peter guler	Study Director	guler
NCT00483223	steven isakoff	Principal Investigator	isakoff
NCT00483366	elizabeth c. reed	Study Chair	reed
NCT00483366	ralph hauke	Principal Investigator	hauke
NCT00485264	andrew wiznia	Study Chair	wiznia
NCT00485264	sharon a. nachman	Study Chair	nachman
NCT00486603	myrna rosenfeld	Study Chair	rosenfeld
NCT00486642	kim chi	Principal Investigator	chi
NCT00487305	eric jacobsen	Principal Investigator	jacobsen
NCT00489307	sriram yennurajalingam	Principal Investigator	yennurajalingam
NCT00490061	quynh-thu le	Principal Investigator	le
NCT00490529	ronald levy	Principal Investigator	levy
NCT00491816	priyanka sharma	Principal Investigator	sharma
NCT00492050	sheeba thomas	Principal Investigator	thomas
NCT00492167	brian h. kushner	Principal Investigator	kushner
NCT00492167	shakeel modak	Study Chair	modak
NCT00492349	l. elliot hong	Principal Investigator	hong
NCT00492999	michael d'angelica	Principal Investigator	d'angelica
NCT00492999	nancy e. kemeny	Principal Investigator	kemeny
NCT00493064	michael gaynon	Principal Investigator	gaynon
NCT00493870	joanne l blum	Principal Investigator	blum
NCT00494182	george blumenschein	Principal Investigator	blumenschein
NCT00494234	andrew tutt	Principal Investigator	tutt
NCT00494234	james carmichael	Study Director	carmichael
NCT00495170	joe y. chang	Principal Investigator	chang
NCT00495716	anna wald	Principal Investigator	wald
NCT00496366	deborah toppmeyer	Principal Investigator	toppmeyer
NCT00497952	joanne kurtzberg	Principal Investigator	kurtzberg
NCT00497952	suzanne t. ildstad	Study Director	ildstad
NCT00498316	elizabeth shpall	Principal Investigator	shpall
NCT00499083	kenneth h. cowan	Principal Investigator	cowan
NCT00499135	glenn liu	Principal Investigator	liu
NCT00499525	william j. gradishar	Study Chair	gradishar
NCT00499603	ana gonzalez-angulo	Principal Investigator	gonzalez-angulo
NCT00499616	clare twist	Study Chair	twist
NCT00499616	mary lou schmidt	Study Chair	schmidt
NCT00499655	karen reckamp	Principal Investigator	reckamp
NCT00500344	rajendra s. apte	Principal Investigator	apte
NCT00500890	michael e. rytting	Principal Investigator	rytting
NCT00501410	scott kopetz	Principal Investigator	kopetz
NCT00504751	richard furman	Principal Investigator	furman
NCT00504894	kane pryor	Principal Investigator	pryor
NCT00505063	rachel kobos	Principal Investigator	kobos
NCT00507728	paul cinciripini	Principal Investigator	cinciripini
NCT00509093	anjali advani	Principal Investigator	advani
NCT00509093	brenda cooper	Principal Investigator	cooper
NCT00509899	ayalew tefferi	Principal Investigator	tefferi
NCT00511992	d. scott mcmeekin	Principal Investigator	mcmeekin
NCT00513240	dean b. andropoulos	Principal Investigator	andropoulos
NCT00513292	aman buzdar	Principal Investigator	buzdar
NCT00513383	lori j. wirth	Principal Investigator	wirth
NCT00513461	john hoefs	Principal Investigator	hoefs
NCT00513695	jennifer specht	Principal Investigator	specht
NCT00513747	john c. byrd	Study Chair	byrd
NCT00513786	david o'malley	Principal Investigator	o'malley
NCT00514046	brigitte c widemann	Principal Investigator	widemann
NCT00514072	james l. gulley	Principal Investigator	gulley
NCT00514449	konasale prasad	Principal Investigator	prasad
NCT00514774	penelope hogarth	Principal Investigator	hogarth
NCT00515021	james a muldowney	Principal Investigator	muldowney
NCT00515281	michael d. schreiber	Principal Investigator	schreiber
NCT00515528	thomas gajeweski	Principal Investigator	gajeweski
NCT00516100	ronald b. natale	Principal Investigator	natale
NCT00516373	dr. johann de bono	Principal Investigator	bono
NCT00516477	albert m maguire	Principal Investigator	maguire
NCT00516607	roy rampling	Study Chair	rampling
NCT00518583	john macdonald	Study Director	macdonald
NCT00520130	lauren m curtis	Principal Investigator	curtis
NCT00520767	jeffrey a. zonder	Principal Investigator	zonder
NCT00520910	brian berman	Principal Investigator	berman
NCT00520975	ingrid mayer	Principal Investigator	mayer
NCT00524277	elizabeth a mittendorf	Principal Investigator	mittendorf
NCT00524277	george e peoples	Study Director	peoples
NCT00525577	walker long	Study Chair	long
NCT00526591	jorge a. garcia	Principal Investigator	garcia
NCT00527566	michael wechsler	Principal Investigator	wechsler
NCT00528580	jerry krishnan	Principal Investigator	krishnan
NCT00528866	mark hurwitz	Principal Investigator	hurwitz
NCT00528866	oliver sartor	Study Chair	sartor
NCT00528866	ying xiao	Study Chair	xiao
NCT00528957	erin quirk	Study Director	quirk
NCT00528983	barry skikne	Study Director	skikne
NCT00529035	john koreth	Principal Investigator	koreth
NCT00530868	andres forero	Principal Investigator	forero
NCT00531284	naseem zojwalla	Study Director	zojwalla
NCT00533949	alex a. adjei	Study Chair	adjei
NCT00533949	arthur william blackstock	Study Chair	blackstock
NCT00533949	gregory a. masters	Study Chair	masters
NCT00533949	hak choy	Study Chair	choy
NCT00533949	jeffrey a. bogart	Study Chair	bogart
NCT00533949	jeffrey bradley	Principal Investigator	bradley
NCT00533949	mark a. socinski	Study Chair	socinski
NCT00533949	steven e. schild	Study Chair	schild
NCT00536341	ian w. flinn	Study Chair	flinn
NCT00536874	eileen o'reilly	Principal Investigator	o'reilly
NCT00536874	peter j. allen	Principal Investigator	allen
NCT00536952	bharat b. mittal	Study Chair	mittal
NCT00536991	saby george	Principal Investigator	george
NCT00538720	nancy d. perrier	Principal Investigator	perrier
NCT00539591	alberto pappo	Principal Investigator	pappo
NCT00540007	todd fehniger	Principal Investigator	fehniger
NCT00540930	carol l shields	Principal Investigator	shields
NCT00540995	anthony stein	Principal Investigator	stein
NCT00542451	eric winer	Principal Investigator	winer
NCT00543504	funda meric-bernstam	Principal Investigator	meric-bernstam
NCT00544830	przemyslaw w. twardowski	Principal Investigator	twardowski
NCT00547066	william wegener	Study Chair	wegener
NCT00547378	steven siegel	Study Chair	siegel
NCT00550537	david carbone	Study Chair	carbone
NCT00550615	julie vose	Principal Investigator	vose
NCT00551070	john farley	Principal Investigator	farley
NCT00551460	cheryl l. willman	Study Chair	willman
NCT00551460	jeffrey e. lancet	Study Chair	lancet
NCT00551460	marilyn l. slovak	Study Chair	slovak
NCT00551460	rami komrokji	Study Chair	komrokji
NCT00553098	lauri burroughs	Principal Investigator	burroughs
NCT00553150	jann n. sarkaria	Study Chair	sarkaria
NCT00553202	stella m. davies	Study Chair	davies
NCT00553410	marco colleoni	Study Chair	colleoni
NCT00553462	rogerio lilenbaum	Study Chair	lilenbaum
NCT00553644	vicki morrison	Principal Investigator	morrison
NCT00553683	andrew n. de la torre	Study Chair	torre
NCT00553800	hossein borghaei	Principal Investigator	borghaei
NCT00554515	allen pantuck	Principal Investigator	pantuck
NCT00554515	david f mcdermott	Study Chair	mcdermott
NCT00554515	geoffrey weiss	Principal Investigator	weiss
NCT00554515	janice dutcher	Principal Investigator	dutcher
NCT00554515	jeffrey sosman	Principal Investigator	sosman
NCT00554515	joseph clark	Principal Investigator	clark
NCT00554515	kim margolin	Principal Investigator	margolin
NCT00554515	leonard appleman	Principal Investigator	appleman
NCT00554515	leslie oleksowicz	Principal Investigator	oleksowicz
NCT00554515	marc ernstoff	Principal Investigator	ernstoff
NCT00554515	michael wong	Principal Investigator	wong
NCT00554515	theodore logan	Principal Investigator	logan
NCT00554515	ulka vaishampayan	Principal Investigator	vaishampayan
NCT00554515	walter urba	Principal Investigator	urba
NCT00554788	ira dunkel	Principal Investigator	dunkel
NCT00555399	marta penas-prado	Principal Investigator	penas-prado
NCT00555399	vinay puduvalli	Study Chair	puduvalli
NCT00555581	robert spiera	Principal Investigator	spiera
NCT00557193	joanne hilden	Principal Investigator	hilden
NCT00557349	roger de la torre	Principal Investigator	torre
NCT00557492	herbert j. zeh	Principal Investigator	zeh
NCT00558519	wendy stock	Study Chair	stock
NCT00558896	martha q. lacy	Study Chair	lacy
NCT00559117	andrew brenner	Principal Investigator	brenner
NCT00559117	pierre triozzi	Principal Investigator	triozzi
NCT00559819	asokumar buvanendran	Study Director	buvanendran
NCT00560586	leila kheirandish	Principal Investigator	kheirandish
NCT00562328	clive s. zent	Study Chair	zent
NCT00562640	richard j. o'reilly	Principal Investigator	o'reilly
NCT00562640	roisin o'cearbhaill	Principal Investigator	o'cearbhaill
NCT00563212	rany condos	Principal Investigator	condos
NCT00563784	ritsuko r. komaki	Principal Investigator	komaki
NCT00565487	yixing jiang	Principal Investigator	jiang
NCT00565773	antonio guasch	Principal Investigator	guasch
NCT00566488	m. louise markert	Principal Investigator	markert
NCT00566540	enver ozer	Principal Investigator	ozer
NCT00566618	stacy moulder	Principal Investigator	moulder
NCT00566696	brandon triplett	Principal Investigator	triplett
NCT00566852	christina a. meyers	Study Chair	meyers
NCT00566852	deepak khuntia	Study Chair	khuntia
NCT00566852	paul d. brown	Principal Investigator	brown
NCT00566852	sherry fox	Study Chair	fox
NCT00567190	ru walker	Study Director	walker
NCT00567359	lecia v. sequist	Principal Investigator	sequist
NCT00567567	julie park	Principal Investigator	park
NCT00567580	alan pollack	Principal Investigator	pollack
NCT00567580	joycelyn l. speight	Study Chair	speight
NCT00569127	james yao	Principal Investigator	yao
NCT00570258	issam makhoul	Principal Investigator	makhoul
NCT00570674	roy b. tishler	Principal Investigator	tishler
NCT00571298	david j sugarbaker	Principal Investigator	sugarbaker
NCT00572065	gail roboz	Principal Investigator	roboz
NCT00572078	daniela e matei	Principal Investigator	matei
NCT00572078	elena g chiorean	Principal Investigator	chiorean
NCT00572169	gareth morgan	Principal Investigator	morgan
NCT00572897	damiano rondelli	Study Chair	rondelli
NCT00572897	giovanni barosi	Study Chair	barosi
NCT00572897	john mascarenhas	Principal Investigator	mascarenhas
NCT00573794	andreas lazar	Study Director	lazar
NCT00574119	marvin w kronenberg	Principal Investigator	kronenberg
NCT00574496	miguel-angel perales	Principal Investigator	perales
NCT00574496	tanya trippett	Principal Investigator	trippett
NCT00574769	mitchell e gross	Principal Investigator	gross
NCT00575952	d. mcmeekin	Principal Investigator	mcmeekin
NCT00576225	jack w. singer	Study Director	singer
NCT00576680	jennifer chan	Principal Investigator	chan
NCT00576979	anthony s. stein	Study Chair	stein
NCT00577005	gerardo gonzalez	Principal Investigator	gonzalez
NCT00577278	auayporn p. nademanee	Study Chair	nademanee
NCT00577304	jan ohrstrom	Study Director	ohrstrom
NCT00577577	richard moxley	Study Chair	moxley
NCT00577629	david rizzieri	Principal Investigator	rizzieri
NCT00579280	david sheehan	Principal Investigator	sheehan
NCT00580333	paula d. ryan	Principal Investigator	ryan
NCT00580645	sherry a mckee	Principal Investigator	mckee
NCT00580931	steven s schreiber	Principal Investigator	schreiber
NCT00583024	david m lubaroff	Principal Investigator	lubaroff
NCT00583453	douglas vandaele	Principal Investigator	vandaele
NCT00586391	carlos ramos	Principal Investigator	ramos
NCT00588770	athanassios (ethan) argiris	Principal Investigator	argiris
NCT00588991	keith pratz	Principal Investigator	pratz
NCT00589056	amit maity	Principal Investigator	maity
NCT00589121	burton l. eisenberg	Study Chair	eisenberg
NCT00589121	david g. kirsch	Study Chair	kirsch
NCT00589121	dian wang	Principal Investigator	wang
NCT00589121	john m. kane	Study Chair	kane
NCT00589121	scott okuno	Study Chair	okuno
NCT00589186	toh han chong	Study Chair	chong
NCT00589875	e. antonio chiocca	Principal Investigator	chiocca
NCT00590824	mark r albertini	Study Chair	albertini
NCT00590824	paul m sondel	Principal Investigator	sondel
NCT00590954	thomas kaley	Principal Investigator	kaley
NCT00591058	burt nabors	Principal Investigator	nabors
NCT00591058	gerry linette	Principal Investigator	linette
NCT00591058	glenn lesser	Principal Investigator	lesser
NCT00591058	jeremy rudnick	Principal Investigator	rudnick
NCT00591058	maceij mrugala	Principal Investigator	mrugala
NCT00591058	sean grimm	Principal Investigator	grimm
NCT00591058	steven rosenfeld	Principal Investigator	rosenfeld
NCT00591292	jonathan lewis	Study Director	lewis
NCT00592150	robert m carey	Principal Investigator	carey
NCT00592501	annie w chan	Principal Investigator	chan
NCT00593242	charles m cotten	Principal Investigator	cotten
NCT00593450	daniel f martin	Study Chair	martin
NCT00593450	glenn jaffe	Study Director	jaffe
NCT00593450	juan e grunwald	Principal Investigator	grunwald
NCT00593450	maureen g maguire	Study Director	maguire
NCT00593450	stuart l fine	Study Chair	fine
NCT00593554	sherif farag	Principal Investigator	farag
NCT00595088	donald lamm	Principal Investigator	lamm
NCT00596011	nagi kumar	Principal Investigator	kumar
NCT00596531	william h martin	Principal Investigator	martin
NCT00596531	yongbing shi	Principal Investigator	shi
NCT00596622	amit anand	Principal Investigator	anand
NCT00599170	anil tulpule	Principal Investigator	tulpule
NCT00600496	jeffrey infante	Principal Investigator	infante
NCT00600496	kevin kim	Principal Investigator	kim
NCT00600496	patricia lorusso	Principal Investigator	lorusso
NCT00600496	roger cohen	Principal Investigator	cohen
NCT00601094	jay m. lee	Study Chair	lee
NCT00601705	david j. adelstein	Principal Investigator	adelstein
NCT00601900	maura dickler	Principal Investigator	dickler
NCT00601913	j. d. browne	Principal Investigator	browne
NCT00601913	mercedes porosnicu	Principal Investigator	porosnicu
NCT00602186	sakineh hajebrahimi	Study Director	hajebrahimi
NCT00602459	john byrd	Principal Investigator	byrd
NCT00602641	alexander stewart	Principal Investigator	stewart
NCT00602693	claudio g. brunstein	Principal Investigator	brunstein
NCT00602693	margaret l. macmillan	Principal Investigator	macmillan
NCT00602836	han win tun	Principal Investigator	tun
NCT00602836	jose f. leis	Principal Investigator	leis
NCT00602836	tait d. shanafelt	Study Chair	shanafelt
NCT00604591	edward huey	Principal Investigator	huey
NCT00605696	michelle ng gong	Principal Investigator	gong
NCT00608075	caleb m adler	Principal Investigator	adler
NCT00608205	panayiotis savvides	Principal Investigator	savvides
NCT00609336	andrew coveler	Principal Investigator	coveler
NCT00609791	arti hurria	Principal Investigator	hurria
NCT00610493	sarina piha-paul	Principal Investigator	piha-paul
NCT00611208	arthur e frankel	Principal Investigator	frankel
NCT00611208	cesar rodriguez	Principal Investigator	rodriguez
NCT00611208	madeleine duvic	Principal Investigator	duvic
NCT00611572	handan gunduz-bruce	Principal Investigator	gunduz-bruce
NCT00612274	stuart seropian	Principal Investigator	seropian
NCT00613080	adam c. berger	Study Chair	berger
NCT00613080	johanna bendell	Study Chair	bendell
NCT00613080	michael c. garofalo	Principal Investigator	garofalo
NCT00614809	wu yilong	Principal Investigator	yilong
NCT00614822	michael guarino	Principal Investigator	guarino
NCT00615784	donald e. tsai	Principal Investigator	tsai
NCT00617409	scott antonia	Principal Investigator	antonia
NCT00617942	william sikov	Principal Investigator	sikov
NCT00617981	riccardo lencioni	Study Director	lencioni
NCT00617981	ronnie t poon	Study Director	poon
NCT00618605	dan barouch	Study Chair	barouch
NCT00618605	lindsey baden	Study Chair	baden
NCT00618605	raphael dolin	Study Chair	dolin
NCT00620633	susan prockop	Principal Investigator	prockop
NCT00621309	david l eaton	Principal Investigator	eaton
NCT00621686	evanthia galanis	Study Chair	galanis
NCT00622466	barbara b. haley	Principal Investigator	haley
NCT00622726	helen a. mintz-hittner	Principal Investigator	mintz-hittner
NCT00624013	mayer davidson	Study Director	davidson
NCT00624715	deepak d'souza	Principal Investigator	d'souza
NCT00624923	allison b. goldfine	Principal Investigator	goldfine
NCT00624923	ernest schaefer	Principal Investigator	schaefer
NCT00624923	francine welty	Study Director	welty
NCT00624923	melvin clouse	Principal Investigator	clouse
NCT00624923	steven e. shoelson	Principal Investigator	shoelson
NCT00625820	rajiv saran	Principal Investigator	saran
NCT00625846	keith bible	Principal Investigator	bible
NCT00626483	gordana vlahovic	Principal Investigator	vlahovic
NCT00626990	anna nowak	Study Chair	nowak
NCT00626990	michael a. vogelbaum	Study Chair	vogelbaum
NCT00626990	s. erridge	Study Chair	erridge
NCT00626990	warren p. mason	Study Chair	mason
NCT00626990	wolfgang wick	Study Chair	wick
NCT00628251	stan kaye	Principal Investigator	kaye
NCT00628498	william tappe	Study Chair	tappe
NCT00628914	ian a cook	Principal Investigator	cook
NCT00629343	robert n taub	Principal Investigator	taub
NCT00629798	hugo castro-malaspina	Principal Investigator	castro-malaspina
NCT00630032	mario campone	Principal Investigator	campone
NCT00630097	gantt galloway	Principal Investigator	galloway
NCT00631072	steven balk	Principal Investigator	balk
NCT00631852	elizabeth peralta	Principal Investigator	peralta
NCT00633165	jack singer	Study Chair	singer
NCT00633594	ian w flinn	Study Chair	flinn
NCT00634270	brian weiss	Principal Investigator	weiss
NCT00634270	bruce korf	Principal Investigator	korf
NCT00634270	roger packer	Study Director	packer
NCT00634634	antoinette tan	Principal Investigator	tan
NCT00635557	andrew p. beelen	Study Director	beelen
NCT00638547	paul orchard	Principal Investigator	orchard
NCT00639743	guy meyer	Principal Investigator	meyer
NCT00639743	stavros konstantinides	Principal Investigator	konstantinides
NCT00640003	thomas o crawford	Principal Investigator	crawford
NCT00641147	francis giardiello	Principal Investigator	giardiello
NCT00641160	george tidmarsh	Study Director	tidmarsh
NCT00644228	brian g. durie	Principal Investigator	durie
NCT00644696	rajen mody	Principal Investigator	mody
NCT00645710	jeffrey wong	Principal Investigator	wong
NCT00646230	barry j. maurer	Study Chair	maurer
NCT00651261	richard m. stone	Study Chair	stone
NCT00652574	anne s. tsao	Principal Investigator	tsao
NCT00653068	alyssa reddy	Principal Investigator	reddy
NCT00654732	michelle fanale	Principal Investigator	fanale
NCT00655850	francisco robert	Principal Investigator	robert
NCT00655876	mohan suntharalingam	Principal Investigator	suntharalingam
NCT00656058	ronald e gress	Principal Investigator	gress
NCT00656786	cliff perlis	Principal Investigator	perlis
NCT00656786	jennifer temel	Principal Investigator	temel
NCT00656786	madeline duvic	Principal Investigator	duvic
NCT00656786	maria colavincenzo	Principal Investigator	colavincenzo
NCT00656786	milan anadkat	Principal Investigator	anadkat
NCT00656786	serena mraz	Principal Investigator	mraz
NCT00656786	vera hirsh	Principal Investigator	hirsh
NCT00658814	sucha nand	Principal Investigator	nand
NCT00658931	john l shuster	Principal Investigator	shuster
NCT00659828	julio licinio	Principal Investigator	licinio
NCT00660101	henry e schea	Study Director	schea
NCT00660283	renato v larocca	Principal Investigator	larocca
NCT00660673	janet benesh	Study Director	benesh
NCT00661492	mark t. fleming	Principal Investigator	fleming
NCT00662129	donald w. northfelt	Study Chair	northfelt
NCT00662506	tracy batchelor	Principal Investigator	batchelor
NCT00662636	charles erlichman	Principal Investigator	erlichman
NCT00663039	henry holcomb	Principal Investigator	holcomb
NCT00663689	wu yilong	Principal Investigator	yilong
NCT00666562	tracy downs	Principal Investigator	downs
NCT00667342	michael bishop	Principal Investigator	bishop
NCT00667615	david straus	Principal Investigator	straus
NCT00668421	ronald hoffman	Principal Investigator	hoffman
NCT00668850	gerald bernstein	Study Chair	bernstein
NCT00668850	jaime davidson	Study Director	davidson
NCT00668850	philip raskin	Principal Investigator	raskin
NCT00668941	robert lindsay	Principal Investigator	lindsay
NCT00669162	xinglei shen	Principal Investigator	shen
NCT00669734	elizabeth poplin	Principal Investigator	poplin
NCT00670748	steven a rosenberg	Principal Investigator	rosenberg
NCT00672737	anthony doufas	Principal Investigator	doufas
NCT00673218	robert g townley	Principal Investigator	townley
NCT00674297	doruk erkan	Principal Investigator	erkan
NCT00674297	silvia pierangeli	Principal Investigator	pierangeli
NCT00676975	francis kl chan	Principal Investigator	chan
NCT00677092	jonathan kay	Principal Investigator	kay
NCT00678743	kevin c. maki	Study Director	maki
NCT00679029	elizabeth reed	Principal Investigator	reed
NCT00679289	john kirkwood	Study Chair	kirkwood
NCT00682435	andrew chang	Principal Investigator	chang
NCT00683670	gerald p. linette	Principal Investigator	linette
NCT00683761	adam mamelak	Principal Investigator	mamelak
NCT00683761	antonio omuro	Principal Investigator	omuro
NCT00683761	david schiff	Principal Investigator	schiff
NCT00683761	edward pan	Principal Investigator	pan
NCT00683761	heather jacene	Principal Investigator	jacene
NCT00683761	jan drappatz	Principal Investigator	drappatz
NCT00683761	jay-jiguang zhu	Principal Investigator	zhu
NCT00683761	jeffrey olson	Principal Investigator	olson
NCT00683761	john fiveash	Principal Investigator	fiveash
NCT00683761	karen fink	Principal Investigator	fink
NCT00683761	maciej mrugala	Principal Investigator	mrugala
NCT00683761	marc chamberlain	Principal Investigator	chamberlain
NCT00683761	mark malkin	Principal Investigator	malkin
NCT00683761	michael edgeworth	Principal Investigator	edgeworth
NCT00683761	nimish mobile	Principal Investigator	mobile
NCT00683761	richard wahl	Principal Investigator	wahl
NCT00683761	steven chmura	Principal Investigator	chmura
NCT00683761	thomas gribbin	Principal Investigator	gribbin
NCT00684294	minal barve	Principal Investigator	barve
NCT00684983	tufia haddad	Principal Investigator	haddad
NCT00685919	david robertson	Principal Investigator	robertson
NCT00686166	cynthia g. leichman	Study Chair	leichman
NCT00686972	dariush elahi	Principal Investigator	elahi
NCT00689572	nassima ait-daoud tiouririne	Principal Investigator	tiouririne
NCT00689936	christian jacques	Study Director	jacques
NCT00691015	zaid al-kadhimi	Study Chair	al-kadhimi
NCT00691106	joseph jorizzo	Principal Investigator	jorizzo
NCT00693654	alan fleischer	Principal Investigator	fleischer
NCT00693693	steve feldman	Principal Investigator	feldman
NCT00694915	amillal bhat	Principal Investigator	bhat
NCT00694915	anup kundu	Principal Investigator	kundu
NCT00694915	b. r. srivastav	Principal Investigator	srivastav
NCT00694915	h. k. moorthy	Principal Investigator	moorthy
NCT00694915	jitendra amlani	Principal Investigator	amlani
NCT00694915	kim mammen	Principal Investigator	mammen
NCT00694915	mahesh desai	Principal Investigator	desai
NCT00694915	n k mohanty	Principal Investigator	mohanty
NCT00694915	padmaraj hegde	Principal Investigator	hegde
NCT00694915	purshottam k. puri	Principal Investigator	puri
NCT00694915	rajeev sood	Principal Investigator	sood
NCT00694915	shrawan k. singh	Principal Investigator	singh
NCT00694915	sujata patwardhan	Principal Investigator	patwardhan
NCT00694915	sushil bhatia	Principal Investigator	bhatia
NCT00694915	yathish kumar	Principal Investigator	kumar
NCT00695409	amrita y. krishnan	Principal Investigator	krishnan
NCT00695786	felipe samaniego	Principal Investigator	samaniego
NCT00697463	adi cohen	Study Director	cohen
NCT00697463	elizabeth shane	Principal Investigator	shane
NCT00697684	david e avigan	Principal Investigator	avigan
NCT00698815	rebecca heist	Principal Investigator	heist
NCT00699491	cynthia ma	Principal Investigator	ma
NCT00700076	deepak c d'souza	Principal Investigator	d'souza
NCT00700596	mohini ranganathan	Principal Investigator	ranganathan
NCT00701233	dennis dykstra	Principal Investigator	dykstra
NCT00702962	chandra p belani	Principal Investigator	belani
NCT00703222	chrystal u louis	Principal Investigator	louis
NCT00703625	joel picus	Principal Investigator	picus
NCT00703664	beata holkova	Principal Investigator	holkova
NCT00705926	eric s. rosenberg	Study Chair	rosenberg
NCT00705926	h.t. banks	Principal Investigator	banks
NCT00705926	marie davidian	Principal Investigator	davidian
NCT00706147	merit cudkowicz	Principal Investigator	cudkowicz
NCT00706147	michael benatar	Principal Investigator	benatar
NCT00707876	william strauss	Study Director	strauss
NCT00708773	federico innocenti	Principal Investigator	innocenti
NCT00709592	amir toor	Principal Investigator	toor
NCT00710892	malcolm k brenner	Principal Investigator	brenner
NCT00711243	mary mulcahy	Principal Investigator	mulcahy
NCT00711828	craig reeder	Principal Investigator	reeder
NCT00713193	spero r cataland	Principal Investigator	cataland
NCT00714246	chandra p. belani	Principal Investigator	belani
NCT00715442	eric jonasch	Principal Investigator	jonasch
NCT00715988	robert ward	Principal Investigator	ward
NCT00716976	david r. freyer	Study Chair	freyer
NCT00718484	jonathan j lewis	Study Director	lewis
NCT00720226	robert a. wise	Principal Investigator	wise
NCT00720876	robert chen	Principal Investigator	chen
NCT00721799	john m. buatti	Principal Investigator	buatti
NCT00721799	yusuf menda	Principal Investigator	menda
NCT00722865	jeremy abramson	Principal Investigator	abramson
NCT00723177	sandra d comer	Principal Investigator	comer
NCT00723229	christine johnston	Principal Investigator	johnston
NCT00723255	edwin alvarez	Principal Investigator	alvarez
NCT00724568	moshe talpaz	Principal Investigator	talpaz
NCT00726232	lance leopold	Study Director	leopold
NCT00726596	mark stein	Principal Investigator	stein
NCT00727948	chris e holmes	Principal Investigator	holmes
NCT00728507	susan dorman	Principal Investigator	dorman
NCT00728728	christine marx	Principal Investigator	marx
NCT00729118	craig c. hofmeister	Principal Investigator	hofmeister
NCT00729612	gregory a. otterson	Principal Investigator	otterson
NCT00729716	avner yayon	Study Director	yayon
NCT00729911	andrea natale	Principal Investigator	natale
NCT00729911	luigi di biase	Principal Investigator	biase
NCT00731302	c m stein	Principal Investigator	stein
NCT00731952	david r jones	Principal Investigator	jones
NCT00732121	richard e pratley	Principal Investigator	pratley
NCT00732498	soham d puvvada	Principal Investigator	puvvada
NCT00732654	robert wood	Principal Investigator	wood
NCT00733746	peter w.t. pisters	Study Chair	pisters
NCT00736645	james l. mohler	Principal Investigator	mohler
NCT00736944	douglas adkins	Principal Investigator	adkins
NCT00737529	lei zhang	Study Director	zhang
NCT00740064	benjamin young	Principal Investigator	young
NCT00740441	greg smith	Principal Investigator	smith
NCT00740441	harry drabkin	Principal Investigator	drabkin
NCT00741403	avi retter	Principal Investigator	retter
NCT00741403	divis k khaira	Principal Investigator	khaira
NCT00741403	karen gelmon	Principal Investigator	gelmon
NCT00741403	senzer neil	Principal Investigator	neil
NCT00742404	james r. berenson	Principal Investigator	berenson
NCT00742560	louie naumovski	Study Director	naumovski
NCT00742573	carlos blanco	Principal Investigator	blanco
NCT00745134	sunil krishnan	Principal Investigator	krishnan
NCT00745420	mary horowitz	Study Director	horowitz
NCT00745615	giancarlo comi	Principal Investigator	comi
NCT00746746	adam i riker	Principal Investigator	riker
NCT00748657	jubilee brown	Principal Investigator	brown
NCT00749957	j timothy stout	Principal Investigator	stout
NCT00752206	kristin baird	Principal Investigator	baird
NCT00755040	madan jagasia	Principal Investigator	jagasia
NCT00756600	andrew davidson	Principal Investigator	davidson
NCT00756600	mary ellen mccann	Principal Investigator	mccann
NCT00756600	neil morton	Principal Investigator	morton
NCT00759291	joshua a. beckman	Principal Investigator	beckman
NCT00759772	pouneh k fazeli	Principal Investigator	fazeli
NCT00759798	william wierda	Principal Investigator	wierda
NCT00760981	david miklos	Principal Investigator	miklos
NCT00764517	stephen spurgeon	Principal Investigator	spurgeon
NCT00765921	ivana kim	Principal Investigator	kim
NCT00766753	frank lieberman	Principal Investigator	lieberman
NCT00767624	rachel manber	Principal Investigator	manber
NCT00767949	glenn stoller	Study Director	stoller
NCT00769379	melody cobleigh	Principal Investigator	cobleigh
NCT00769483	milind javle	Principal Investigator	javle
NCT00769613	kenneth g. lucas	Principal Investigator	lucas
NCT00770120	linda garland	Study Chair	garland
NCT00770120	sai-hong i. ou	Study Chair	ou
NCT00770224	jonathan w. friedberg	Study Chair	friedberg
NCT00770224	lisa rimsza	Study Chair	rimsza
NCT00770224	oliver w. press	Study Chair	press
NCT00770809	lisa carey	Principal Investigator	carey
NCT00772486	januario castro	Principal Investigator	castro
NCT00774345	kenichi takechita	Study Director	takechita
NCT00776594	mary-ellen taplin	Principal Investigator	taplin
NCT00777491	cheryl t. lee	Study Chair	lee
NCT00777491	chin-lee wu	Study Chair	wu
NCT00777491	john j. coen	Principal Investigator	coen
NCT00777491	philip j. saylor	Study Chair	saylor
NCT00777673	jasgit c. sachdev	Principal Investigator	sachdev
NCT00777881	robert redner	Principal Investigator	redner
NCT00780234	robert l. keith	Principal Investigator	keith
NCT00782288	pamela l zeitlin	Principal Investigator	zeitlin
NCT00782574	j ballmana gelpi	Principal Investigator	gelpi
NCT00782574	judy e garber	Principal Investigator	garber
NCT00783367	stephen j schuster	Principal Investigator	schuster
NCT00785291	hope rugo	Principal Investigator	rugo
NCT00787059	amit patel	Principal Investigator	patel
NCT00787059	clyde w yancy	Principal Investigator	yancy
NCT00787059	david r murray	Principal Investigator	murray
NCT00787059	eric d adler	Principal Investigator	adler
NCT00787059	h. kirk hammond	Study Director	hammond
NCT00787059	jay h traverse	Principal Investigator	traverse
NCT00787059	matthew w watkins	Principal Investigator	watkins
NCT00787059	william penny	Principal Investigator	penny
NCT00787969	david j. inwards	Study Chair	inwards
NCT00788112	laura esserman	Principal Investigator	esserman
NCT00788125	judith k. sato	Principal Investigator	sato
NCT00789581	denise a yardley	Study Chair	yardley
NCT00789633	gaĂ«l deplanque	Principal Investigator	deplanque
NCT00789958	edgar ben-josef	Principal Investigator	ben-josef
NCT00790335	clive kearon	Principal Investigator	kearon
NCT00790335	samuel z goldhaber	Study Chair	goldhaber
NCT00790335	suresh vedantham	Principal Investigator	vedantham
NCT00790582	robert g miller	Study Director	miller
NCT00790842	joseph r. mikhael	Study Chair	mikhael
NCT00790868	david f tolin	Principal Investigator	tolin
NCT00790868	mark h pollack	Principal Investigator	pollack
NCT00790868	michael w otto	Study Chair	otto
NCT00791037	mary disis	Principal Investigator	disis
NCT00792142	firoozeh sahebi	Principal Investigator	sahebi
NCT00792701	ralph g. zinner	Study Chair	zinner
NCT00793572	marco mielcarek	Principal Investigator	mielcarek
NCT00794339	david a. mankoff	Study Chair	mankoff
NCT00794339	farrokh dehdashti	Principal Investigator	dehdashti
NCT00794950	alon weizer	Principal Investigator	weizer
NCT00796562	heather symons	Principal Investigator	symons
NCT00796978	cynthia owusu	Principal Investigator	owusu
NCT00798655	robert ferris	Principal Investigator	ferris
NCT00798720	tien hoang	Principal Investigator	hoang
NCT00799617	peter j snyder	Principal Investigator	snyder
NCT00802412	robert m. anthenelli	Principal Investigator	anthenelli
NCT00803972	jolene k berg	Principal Investigator	berg
NCT00804336	jennifer ang chan	Principal Investigator	chan
NCT00805129	dean bajorin	Principal Investigator	bajorin
NCT00807365	kenneth l. minaker	Principal Investigator	minaker
NCT00807586	daniel p melby	Principal Investigator	melby
NCT00807599	hani hassoun	Principal Investigator	hassoun
NCT00807768	marcus randall	Principal Investigator	randall
NCT00807963	emanuel p denoia	Principal Investigator	denoia
NCT00808314	timothy m bateman	Principal Investigator	bateman
NCT00808639	toni choueiri	Principal Investigator	choueiri
NCT00810888	edward c. jauch	Principal Investigator	jauch
NCT00810888	matthew l. flaherty	Principal Investigator	flaherty
NCT00813293	rebecca a miksad	Principal Investigator	miksad
NCT00813423	janice mehnert	Principal Investigator	mehnert
NCT00813826	kevin pojasek	Study Director	pojasek
NCT00814294	david orloff	Study Director	orloff
NCT00814294	len rosenberg	Study Director	rosenberg
NCT00815035	wesley burks	Principal Investigator	burks
NCT00816595	jose f. francisco	Principal Investigator	francisco
NCT00819546	richard stone	Principal Investigator	stone
NCT00820170	monica fornier	Principal Investigator	fornier
NCT00820872	edith a. perez	Study Chair	perez
NCT00822848	christopher w. ryan	Principal Investigator	ryan
NCT00823212	peter m maurer	Study Director	maurer
NCT00824200	theodore johnson ii	Principal Investigator	ii
NCT00824993	huifang lu	Principal Investigator	lu
NCT00825201	mihaela cristea	Study Chair	cristea
NCT00825656	martha white	Principal Investigator	white
NCT00825721	reeta gurung	Principal Investigator	gurung
NCT00825721	sanduk ruit	Principal Investigator	ruit
NCT00825942	ira wong	Study Director	wong
NCT00826202	daniel c javitt	Principal Investigator	javitt
NCT00826540	axel grothey	Study Chair	grothey
NCT00830544	fernando cabanillas	Principal Investigator	cabanillas
NCT00831766	jeffrey lancet	Principal Investigator	lancet
NCT00831792	paul corn	Principal Investigator	corn
NCT00833261	lucien a. nedzi	Principal Investigator	nedzi
NCT00834093	jochen lorch	Principal Investigator	lorch
NCT00834665	carl h june	Study Chair	june
NCT00837928	john c. grecula	Principal Investigator	grecula
NCT00838435	suyash prasad	Study Director	prasad
NCT00838656	christopher poole	Principal Investigator	poole
NCT00840931	javier pinilla	Principal Investigator	pinilla
NCT00841074	catherine j binkley	Principal Investigator	binkley
NCT00841802	robert p schleimer	Principal Investigator	schleimer
NCT00843882	alan list	Principal Investigator	list
NCT00844831	john wo	Principal Investigator	wo
NCT00846430	albert s cornelius	Principal Investigator	cornelius
NCT00847171	leisha a. emens	Principal Investigator	emens
NCT00847912	martin a. weinstock	Study Chair	weinstock
NCT00848328	joseph m. tuscano	Principal Investigator	tuscano
NCT00849121	douglas mcneel	Principal Investigator	mcneel
NCT00852787	deepak malhotra	Principal Investigator	malhotra
NCT00853125	roger strair	Principal Investigator	strair
NCT00853580	jonathan payne	Study Director	payne
NCT00853580	kathryn north	Principal Investigator	north
NCT00853580	maria acosta	Study Director	acosta
NCT00856245	siddhartha ganguly	Principal Investigator	ganguly
NCT00856401	john p bilezikian	Principal Investigator	bilezikian
NCT00856492	zeina nahleh	Principal Investigator	nahleh
NCT00857025	marianna koczywas	Principal Investigator	koczywas
NCT00857389	laura l. worth	Principal Investigator	worth
NCT00857545	paul sabbatini	Principal Investigator	sabbatini
NCT00858117	olga frankfurt	Principal Investigator	frankfurt
NCT00859222	patrick y. wen	Principal Investigator	wen
NCT00859716	mohamed al-ibrahim	Principal Investigator	al-ibrahim
NCT00859937	stuart wong	Principal Investigator	wong
NCT00860379	maggie l dylewski	Principal Investigator	dylewski
NCT00860522	david f claxton	Principal Investigator	claxton
NCT00861406	wen-jen hwu	Principal Investigator	hwu
NCT00861913	amy weise	Principal Investigator	weise
NCT00863369	leslie popplewell	Principal Investigator	popplewell
NCT00865566	magdalena sobieszczyk	Study Chair	sobieszczyk
NCT00865566	michael yin	Study Chair	yin
NCT00865566	scott hammer	Study Chair	hammer
NCT00866879	lorenzo gallon	Principal Investigator	gallon
NCT00866918	john gregory	Principal Investigator	gregory
NCT00867048	abdel babiker	Study Chair	babiker
NCT00867048	fred gordin	Study Chair	gordin
NCT00867048	james d neaton	Principal Investigator	neaton
NCT00867048	jens lundgren	Study Chair	lundgren
NCT00867048	sean emery	Study Chair	emery
NCT00867217	qamar j khan	Principal Investigator	khan
NCT00867529	david maloney	Principal Investigator	maloney
NCT00868114	emmanuel e zervos	Principal Investigator	zervos
NCT00869024	ganesh raveendran	Principal Investigator	raveendran
NCT00869206	andrew l. himelstein	Study Chair	himelstein
NCT00869401	nadia n. laack	Study Chair	laack
NCT00870779	david w roberts	Principal Investigator	roberts
NCT00870779	keith paulsen	Principal Investigator	paulsen
NCT00870987	judith epstein	Principal Investigator	epstein
NCT00871923	james welsh	Principal Investigator	welsh
NCT00872911	elena volpi	Principal Investigator	volpi
NCT00872989	robert l. coleman	Study Chair	coleman
NCT00873093	terzah horton	Principal Investigator	horton
NCT00873275	lily l. lai	Principal Investigator	lai
NCT00878904	pamela n. munster	Principal Investigator	munster
NCT00879177	william b white	Principal Investigator	white
NCT00879489	paul o. schwarzenberger	Principal Investigator	schwarzenberger
NCT00880919	s. charles schulz	Principal Investigator	schulz
NCT00881361	judy boughey	Study Chair	boughey
NCT00881556	angela christiano	Principal Investigator	christiano
NCT00883129	donald p. tashkin	Principal Investigator	tashkin
NCT00883129	michael d. roth	Principal Investigator	roth
NCT00883129	robert m. elashoff	Principal Investigator	elashoff
NCT00883298	michael a. badurddoja	Principal Investigator	badurddoja
NCT00884312	kanya rajangam	Study Director	rajangam
NCT00884741	mark gilbert	Principal Investigator	gilbert
NCT00885326	julia l. glade-bender	Principal Investigator	glade-bender
NCT00885495	carl j fichtenbaum	Principal Investigator	fichtenbaum
NCT00885703	robert a. larsen	Study Chair	larsen
NCT00885703	umesh g. lalloo	Study Chair	lalloo
NCT00886028	elena arechaga ocampo	Study Chair	ocampo
NCT00886028	enrique estrada lobato	Study Chair	lobato
NCT00886028	luis alberto medina velĂ¡zquez	Study Chair	velĂ¡zquez
NCT00886028	luisa geraldine villanueva rodrĂ­guez	Study Chair	rodrĂ­guez
NCT00886028	miguel angel rĂ­os trejo	Study Chair	trejo
NCT00886028	victoria lĂ³pez rodrĂ­gez	Study Chair	rodrĂ­gez
NCT00886691	william p. tew	Study Chair	tew
NCT00887159	chandra belani	Principal Investigator	belani
NCT00888173	matthew powell	Principal Investigator	powell
NCT00888628	james f markmann	Principal Investigator	markmann
NCT00889408	verokina bachanova	Principal Investigator	bachanova
NCT00890617	frank a. baciewicz	Principal Investigator	baciewicz
NCT00890786	maryam fouladi	Principal Investigator	fouladi
NCT00890825	dr pasi janne	Principal Investigator	janne
NCT00890825	gabriella mariani	Study Director	mariani
NCT00891527	kathy j jenkins	Principal Investigator	jenkins
NCT00892736	shannon puhalla	Principal Investigator	puhalla
NCT00900809	michael boyiadzis	Principal Investigator	boyiadzis
NCT00901069	hayslip w john	Principal Investigator	john
NCT00902018	james b bussel	Principal Investigator	bussel
NCT00902577	elizabeth gerstner	Principal Investigator	gerstner
NCT00903461	julie bauman	Principal Investigator	bauman
NCT00904033	luke j peppone	Principal Investigator	peppone
NCT00904345	shruti jolly	Principal Investigator	jolly
NCT00906945	geoffrey l. uy	Principal Investigator	uy
NCT00907166	neil senzer	Principal Investigator	senzer
NCT00908791	margit m mcgowan	Principal Investigator	mcgowan
NCT00909090	billy r hammond	Principal Investigator	hammond
NCT00909831	ravi amaravadi	Principal Investigator	amaravadi
NCT00910910	oliver kong	Study Director	kong
NCT00911820	peter c. enzinger	Principal Investigator	enzinger
NCT00912340	elisavet paplomata	Principal Investigator	paplomata
NCT00912691	eugene arnold	Principal Investigator	arnold
NCT00914940	marie bleakley	Principal Investigator	bleakley
NCT00914940	warren shlomchik	Principal Investigator	shlomchik
NCT00915005	zhongxing liao	Study Chair	liao
NCT00915694	jay f. dorsey	Principal Investigator	dorsey
NCT00916409	eric t. wong	Study Director	wong
NCT00916409	herbert h. engelhard	Study Director	engelhard
NCT00916409	manfred westphal	Study Director	westphal
NCT00916409	philip h. gutin	Study Director	gutin
NCT00916578	wendy woodward	Study Chair	woodward
NCT00916747	mark kieran	Principal Investigator	kieran
NCT00917462	david ilson	Principal Investigator	ilson
NCT00918333	shaji kumar	Principal Investigator	kumar
NCT00918723	mazyar shadman	Principal Investigator	shadman
NCT00920023	ralph weissleder	Principal Investigator	weissleder
NCT00920699	christopher a ross	Principal Investigator	ross
NCT00920699	kevin m biglan	Principal Investigator	biglan
NCT00921310	maria baggstrom	Principal Investigator	baggstrom
NCT00921557	george k. siberry	Study Chair	siberry
NCT00922883	cynthia e dunbar	Principal Investigator	dunbar
NCT00923351	john glod	Principal Investigator	glod
NCT00923364	dennis d hickstein	Principal Investigator	hickstein
NCT00923845	daniel h fowler	Principal Investigator	fowler
NCT00924703	celeste decker	Study Director	decker
NCT00925314	gregory daniels	Principal Investigator	daniels
NCT00926380	benjamin z leder	Principal Investigator	leder
NCT00926380	robert m neer	Principal Investigator	neer
NCT00928135	jan l launspach	Study Chair	launspach
NCT00928135	joseph zabner	Principal Investigator	zabner
NCT00928135	lakshmi durairaj	Study Director	durairaj
NCT00929214	eric a. strom	Principal Investigator	strom
NCT00929344	barbara j mason	Principal Investigator	mason
NCT00930579	dawn l hershman	Principal Investigator	hershman
NCT00931840	richard m. goldberg	Principal Investigator	goldberg
NCT00932113	alice b. gottlieb	Principal Investigator	gottlieb
NCT00932828	arvil w burks	Principal Investigator	burks
NCT00934427	jeff gregory	Study Director	gregory
NCT00934440	peter j van veldhuizen	Principal Investigator	veldhuizen
NCT00934895	deborah l. toppmeyer	Principal Investigator	toppmeyer
NCT00936390	alvaro a. martinez	Study Chair	martinez
NCT00937937	christopher lao	Principal Investigator	lao
NCT00938470	steven r. alberts	Study Chair	alberts
NCT00939770	yael p. mosse	Study Chair	mosse
NCT00939822	cynthia m. carlsson	Principal Investigator	carlsson
NCT00940771	janice piatt	Principal Investigator	piatt
NCT00941720	ronald m. sobecks	Principal Investigator	sobecks
NCT00942331	jonathan rosenberg	Principal Investigator	rosenberg
NCT00942357	daniela matei	Principal Investigator	matei
NCT00942578	william l dahut	Principal Investigator	dahut
NCT00943319	andrew artz	Principal Investigator	artz
NCT00943618	paul m cinciripini	Principal Investigator	cinciripini
NCT00943943	michael andreeff	Principal Investigator	andreeff
NCT00944047	qamar khan	Principal Investigator	khan
NCT00946088	deirdre judith lyell	Principal Investigator	lyell
NCT00946673	griffith r. harsh	Principal Investigator	harsh
NCT00946712	roy herbst	Principal Investigator	herbst
NCT00948064	guillermo garcia-manero	Principal Investigator	garcia-manero
NCT00948688	lawrence blaszkowsky	Principal Investigator	blaszkowsky
NCT00948740	jie tang	Principal Investigator	tang
NCT00948753	david porter	Principal Investigator	porter
NCT00948922	melissa alsina	Principal Investigator	alsina
NCT00949949	brian costello	Principal Investigator	costello
NCT00949988	thomas j kipps	Principal Investigator	kipps
NCT00950248	bibiana bielekova	Principal Investigator	bielekova
NCT00951496	joan walker	Principal Investigator	walker
NCT00954278	anne m traynor	Principal Investigator	traynor
NCT00954707	daniel simon	Principal Investigator	simon
NCT00954707	david kandzari	Principal Investigator	kandzari
NCT00955006	janine maenza	Study Chair	maenza
NCT00956332	sam l. teichman	Study Director	teichman
NCT00957359	anthony bossis	Study Chair	bossis
NCT00957359	jeffrey guss	Study Director	guss
NCT00957359	stephen ross	Principal Investigator	ross
NCT00960752	richard royal	Principal Investigator	royal
NCT00961220	kevin cooper	Principal Investigator	cooper
NCT00961961	john m zajecka	Principal Investigator	zajecka
NCT00961961	robert j. derubeis	Principal Investigator	derubeis
NCT00962845	janice m. mehnert	Principal Investigator	mehnert
NCT00963274	amy kimball	Principal Investigator	kimball
NCT00963274	nishitha reddy	Principal Investigator	reddy
NCT00963274	sho ma	Principal Investigator	ma
NCT00963274	steven grant	Study Chair	grant
NCT00963781	david e kandzari	Principal Investigator	kandzari
NCT00963781	eric j. topol	Principal Investigator	topol
NCT00963781	paul s. teirstein	Principal Investigator	teirstein
NCT00964080	jaffer a. ajani	Principal Investigator	ajani
NCT00964353	david o meltzer	Principal Investigator	meltzer
NCT00964886	joseph h atkinson	Principal Investigator	atkinson
NCT00965250	giuseppe giaccone	Principal Investigator	giaccone
NCT00966693	jatin j. shah	Study Chair	shah
NCT00967005	jon e grant	Principal Investigator	grant
NCT00967005	marc n potenza	Principal Investigator	potenza
NCT00967369	michelle a. fanale	Study Chair	fanale
NCT00968110	dale umetsu	Principal Investigator	umetsu
NCT00968760	partow kebriaei	Study Chair	kebriaei
NCT00970905	steven ades	Principal Investigator	ades
NCT00972478	daniel persky	Principal Investigator	persky
NCT00972933	ahmad tarhini	Principal Investigator	tarhini
NCT00974142	michael donahoe	Principal Investigator	donahoe
NCT00975819	denise m adams	Principal Investigator	adams
NCT00976131	heather greenlee	Principal Investigator	greenlee
NCT00976248	steven treon	Principal Investigator	treon
NCT00977470	lecia sequist	Principal Investigator	sequist
NCT00977574	carol aghajanian	Principal Investigator	aghajanian
NCT00977691	courtney d fitzhugh	Principal Investigator	fitzhugh
NCT00979212	martin j. edelman	Principal Investigator	edelman
NCT00979992	john chan	Principal Investigator	chan
NCT00981747	alicia k gerke	Principal Investigator	gerke
NCT00982787	siegward m elsas	Principal Investigator	elsas
NCT00983580	frank sinicrope	Principal Investigator	sinicrope
NCT00985517	raymond t bartus	Study Director	bartus
NCT00986609	joseph baar	Principal Investigator	baar
NCT00987389	david jayne	Principal Investigator	jayne
NCT00987389	michael walsh	Principal Investigator	walsh
NCT00987389	peter merkel	Principal Investigator	merkel
NCT00987480	faird boulad	Principal Investigator	boulad
NCT00987766	laura goff	Principal Investigator	goff
NCT00987948	cecilia m shikuma	Principal Investigator	shikuma
NCT00988208	debora barton	Study Director	barton
NCT00988429	patrĂ­cio soares-da-silva	Study Director	soares-da-silva
NCT00989651	katherine bell-mcguinn	Principal Investigator	bell-mcguinn
NCT00993759	ronald turner	Principal Investigator	turner
NCT00994643	matthew carabasi	Principal Investigator	carabasi
NCT00995150	andrea olariu	Study Director	olariu
NCT00996073	roger brown	Study Director	brown
NCT00997035	nisha acharya	Principal Investigator	acharya
NCT00997035	nv prajna	Principal Investigator	prajna
NCT00997035	tom lietman	Principal Investigator	lietman
NCT00997334	david jackman	Principal Investigator	jackman
NCT00998010	albert lai	Principal Investigator	lai
NCT00999609	stephen r russell	Principal Investigator	russell
NCT00999804	mothaffar rimawi	Principal Investigator	rimawi
NCT01000285	lee ratner	Principal Investigator	ratner
NCT01001442	kenneth c. anderson	Study Director	anderson
NCT01001754	jan hillson	Study Director	hillson
NCT01002547	kenneth cusi	Principal Investigator	cusi
NCT01002755	alessandra ferrajoli	Study Chair	ferrajoli
NCT01002924	siu-long yao	Study Director	yao
NCT01004874	annick desjardins	Principal Investigator	desjardins
NCT01004978	jean-francois (jeff) geschwind	Principal Investigator	geschwind
NCT01005108	jun j mao	Principal Investigator	mao
NCT01005472	bartosz chmielowski	Principal Investigator	chmielowski
NCT01005576	shalini shenoy	Principal Investigator	shenoy
NCT01007630	grace s liang	Principal Investigator	liang
NCT01008917	alan p venook	Principal Investigator	venook
NCT01008917	robin k kelley	Principal Investigator	kelley
NCT01009437	david a. potter	Principal Investigator	potter
NCT01009918	maya guglin	Study Chair	guglin
NCT01010217	stefan ciurea	Study Chair	ciurea
NCT01011010	hanna h. sanoff	Principal Investigator	sanoff
NCT01011218	oxana rg palesh	Principal Investigator	palesh
NCT01011374	lawrence j singerman	Principal Investigator	singerman
NCT01011439	anna petroccione	Study Director	petroccione
NCT01011439	arun rajan	Principal Investigator	rajan
NCT01011439	benjamin besse	Principal Investigator	besse
NCT01011439	glen weiss	Principal Investigator	weiss
NCT01011439	julien maziĂ¨res	Principal Investigator	maziĂ¨res
NCT01011439	marina c garassino	Principal Investigator	garassino
NCT01011439	silvia novello	Principal Investigator	novello
NCT01013441	chitra hosing	Principal Investigator	hosing
NCT01013870	claudia s robertson	Principal Investigator	robertson
NCT01014598	chukwumere nwogu	Principal Investigator	nwogu
NCT01015222	filip janku	Principal Investigator	janku
NCT01015833	ghassan abou-alfa	Principal Investigator	abou-alfa
NCT01016730	erin reid	Principal Investigator	reid
NCT01016769	david pfister	Principal Investigator	pfister
NCT01019187	michael perlis	Principal Investigator	perlis
NCT01020539	monica bhatia	Principal Investigator	bhatia
NCT01021241	alan kivitz	Principal Investigator	kivitz
NCT01021241	anthony s fiorino	Study Director	fiorino
NCT01022580	roberta a ballard	Principal Investigator	ballard
NCT01023477	kirsten h edmiston	Principal Investigator	edmiston
NCT01023477	priscilla mcauliffe	Principal Investigator	mcauliffe
NCT01024010	han w. tun	Principal Investigator	tun
NCT01024010	jose leis	Principal Investigator	leis
NCT01024010	tait shanafelt	Study Chair	shanafelt
NCT01024387	matthew kulke	Principal Investigator	kulke
NCT01025427	hiroyu hatano	Principal Investigator	hatano
NCT01025453	eric sherman	Principal Investigator	sherman
NCT01026220	kara kelly	Principal Investigator	kelly
NCT01026493	h. ian robins	Principal Investigator	robins
NCT01026987	john dipersio	Principal Investigator	dipersio
NCT01027000	edwin p. alyea	Study Chair	alyea
NCT01027702	andrew gilman	Principal Investigator	gilman
NCT01027754	shadi nahvi	Principal Investigator	nahvi
NCT01027949	kevin laliberte	Study Director	laliberte
NCT01029262	albert hoenekopp	Study Director	hoenekopp
NCT01034254	mark c steinhoff	Principal Investigator	steinhoff
NCT01034631	thomas hutson	Study Chair	hutson
NCT01036087	naoto ueno	Study Chair	ueno
NCT01036113	joyce a o'shaughnessy	Principal Investigator	o'shaughnessy
NCT01036594	charles j. ryan	Principal Investigator	ryan
NCT01037621	mary jane burton	Principal Investigator	burton
NCT01038388	jonathan kaufman	Principal Investigator	kaufman
NCT01038583	john mcneil	Principal Investigator	mcneil
NCT01038583	richard grimm	Principal Investigator	grimm
NCT01040000	philip m arlen	Study Director	arlen
NCT01040221	eric hollander	Principal Investigator	hollander
NCT01041274	donald c goff	Principal Investigator	goff
NCT01041521	christine a wanke	Principal Investigator	wanke
NCT01042158	paul hassoun	Principal Investigator	hassoun
NCT01042535	hatem soliman	Principal Investigator	soliman
NCT01044238	maureen hillhouse	Study Director	hillhouse
NCT01044433	corey langer	Principal Investigator	langer
NCT01044745	robert bociek	Principal Investigator	bociek
NCT01046604	ethan j anderson	Principal Investigator	anderson
NCT01047319	prof. timothy vollmer	Principal Investigator	vollmer
NCT01047722	jeffrey a klein	Principal Investigator	klein
NCT01048827	thomas martin	Study Chair	martin
NCT01049451	regina r berkovich	Principal Investigator	berkovich
NCT01049854	mitchell s cairo	Principal Investigator	cairo
NCT01050647	yasser y el-sayed	Principal Investigator	el-sayed
NCT01050842	erik p. castle	Study Chair	castle
NCT01054079	k.c. balaji	Principal Investigator	balaji
NCT01054144	rachid baz	Principal Investigator	baz
NCT01055028	kristen n. ganjoo	Principal Investigator	ganjoo
NCT01056276	jesus berdeja	Study Chair	berdeja
NCT01056393	william towner	Principal Investigator	towner
NCT01056965	adam l. boxer	Principal Investigator	boxer
NCT01058655	brian wolpin	Principal Investigator	wolpin
NCT01058941	lynne shinto	Principal Investigator	shinto
NCT01059929	john p kress	Principal Investigator	kress
NCT01060384	julie m vose	Principal Investigator	vose
NCT01061775	m. jennifer abuzzahab	Principal Investigator	abuzzahab
NCT01062399	prakash chinnaiyan	Principal Investigator	chinnaiyan
NCT01062451	thomas f newton	Principal Investigator	newton
NCT01064648	anne tsao	Principal Investigator	tsao
NCT01065129	mark schroeder	Principal Investigator	schroeder
NCT01065662	susana campos	Principal Investigator	campos
NCT01066637	robert j gropler	Principal Investigator	gropler
NCT01067144	ian r carroll	Principal Investigator	carroll
NCT01067469	john degroot	Study Chair	degroot
NCT01068327	chi lin	Principal Investigator	lin
NCT01068769	suzanne george	Principal Investigator	george
NCT01069510	craig broberg	Principal Investigator	broberg
NCT01071941	kenneth k. tanabe	Principal Investigator	tanabe
NCT01074047	c l beach	Study Director	beach
NCT01074411	don dizon	Principal Investigator	dizon
NCT01074554	wonder p drake	Principal Investigator	drake
NCT01074970	kathy d. miller	Study Chair	miller
NCT01075412	michael m graham	Study Director	graham
NCT01075412	sarah mcguire	Principal Investigator	mcguire
NCT01076543	sonali smith	Principal Investigator	smith
NCT01078662	bella kaufman	Principal Investigator	kaufman
NCT01080391	a. keith stewart	Principal Investigator	stewart
NCT01080391	antonio palumbo	Principal Investigator	palumbo
NCT01080391	philippe moreau	Principal Investigator	moreau
NCT01080391	s. vincent rajkumar	Principal Investigator	rajkumar
NCT01081262	david gershenson	Principal Investigator	gershenson
NCT01082679	randy brown	Principal Investigator	brown
NCT01083316	vaishali sanchorawala	Principal Investigator	sanchorawala
NCT01084057	yuan yuan	Principal Investigator	yuan
NCT01086332	sudershan k. bhatia	Study Director	bhatia
NCT01086605	alvaro moreno-asptia	Study Chair	moreno-asptia
NCT01088802	arlene forastiere	Principal Investigator	forastiere
NCT01088802	quon harry	Principal Investigator	harry
NCT01088815	ana de jesus-acosta	Principal Investigator	jesus-acosta
NCT01088815	daniel laheru	Principal Investigator	laheru
NCT01089101	jason fangusaro	Principal Investigator	fangusaro
NCT01089361	daniel talmor	Principal Investigator	talmor
NCT01089647	ann romaker	Principal Investigator	romaker
NCT01090128	hung khong	Principal Investigator	khong
NCT01090414	siddhartha mitra	Study Director	mitra
NCT01091454	alvaro moreno aspitia	Study Chair	aspitia
NCT01091792	camilo e fadul	Principal Investigator	fadul
NCT01093183	jue wang	Principal Investigator	wang
NCT01093521	christopher h goss	Principal Investigator	goss
NCT01095120	jaffer ajani	Study Chair	ajani
NCT01095224	xia jin	Study Chair	jin
NCT01095822	victor serebruany	Study Director	serebruany
NCT01097642	jenny chang	Principal Investigator	chang
NCT01097694	elliot israel	Principal Investigator	israel
NCT01097694	joshua boyce	Principal Investigator	boyce
NCT01097746	anil sood	Principal Investigator	sood
NCT01098266	antonio lambiase	Study Director	lambiase
NCT01100502	naomi hunder	Study Director	hunder
NCT01100775	l. e. hong	Principal Investigator	hong
NCT01101880	pamela becker	Principal Investigator	becker
NCT01102374	adit a ginde	Principal Investigator	ginde
NCT01102426	Ă³scar f. ballester	Principal Investigator	ballester
NCT01102426	rubĂ©n niesvizky	Principal Investigator	niesvizky
NCT01103635	robert vonderheide	Principal Investigator	vonderheide
NCT01105546	elena santagostino	Principal Investigator	santagostino
NCT01106027	mark stegall	Principal Investigator	stegall
NCT01106157	michael j. haller	Principal Investigator	haller
NCT01106872	mohammed milhem	Principal Investigator	milhem
NCT01111058	tanguy seiwert	Principal Investigator	seiwert
NCT01111305	amy d klion	Principal Investigator	klion
NCT01111526	lia perez	Principal Investigator	perez
NCT01111994	valerie callender	Principal Investigator	callender
NCT01112306	aline frey	Study Director	frey
NCT01112527	tracy t. batchelor	Principal Investigator	batchelor
NCT01113502	noelle frey	Principal Investigator	frey
NCT01113515	vickie r driver	Principal Investigator	driver
NCT01113970	jonathan j. lewis	Study Director	lewis
NCT01116648	joyce liu	Principal Investigator	liu
NCT01118052	ronald alvarez	Principal Investigator	alvarez
NCT01119664	andrew haas	Principal Investigator	haas
NCT01120236	evan yu	Principal Investigator	yu
NCT01120639	scott soltys	Principal Investigator	soltys
NCT01121120	michael schuster	Principal Investigator	schuster
NCT01121224	emmanouil s brilakis	Study Chair	brilakis
NCT01122199	shadia i jalal	Study Chair	jalal
NCT01122901	david peereboom	Principal Investigator	peereboom
NCT01124539	james j vredneburgh	Principal Investigator	vredneburgh
NCT01124734	joseph j drabick	Principal Investigator	drabick
NCT01125046	priya kumthekar	Principal Investigator	kumthekar
NCT01126736	harish dave	Study Director	dave
NCT01128296	herbert zeh	Principal Investigator	zeh
NCT01128582	ronnie fass	Principal Investigator	fass
NCT01129193	craig hofmeister	Principal Investigator	hofmeister
NCT01129453	karen l kotloff	Principal Investigator	kotloff
NCT01132014	janos tanyi	Principal Investigator	tanyi
NCT01133678	everett vokes	Principal Investigator	vokes
NCT01134198	wilfid n raby	Principal Investigator	raby
NCT01134575	hagop kantarjian	Study Chair	kantarjian
NCT01134614	frank hodi	Principal Investigator	hodi
NCT01136356	eric strain	Principal Investigator	strain
NCT01136772	joseph p mcevoy	Principal Investigator	mcevoy
NCT01136772	scott stroup	Principal Investigator	stroup
NCT01136928	adriana andrade	Principal Investigator	andrade
NCT01137695	alan schorr	Principal Investigator	schorr
NCT01137695	cheryl rosenfeld	Principal Investigator	rosenfeld
NCT01137695	jeffrey rothman	Principal Investigator	rothman
NCT01139294	thomas j abramo	Principal Investigator	abramo
NCT01139970	ivana gojo	Principal Investigator	gojo
NCT01140360	kent robertson	Principal Investigator	robertson
NCT01141491	william tap	Principal Investigator	tap
NCT01142232	attaya suvannasankha	Principal Investigator	suvannasankha
NCT01142388	steven cohen	Principal Investigator	cohen
NCT01142401	kerin adelson	Principal Investigator	adelson
NCT01143402	paul chapman	Principal Investigator	chapman
NCT01144338	nardev khurmi	Study Director	khurmi
NCT01145209	inhye ahn	Principal Investigator	ahn
NCT01145430	bhavana pothuri	Principal Investigator	pothuri
NCT01145495	peter martin	Principal Investigator	martin
NCT01145807	eduardo tschen	Principal Investigator	tschen
NCT01146054	albert koong	Principal Investigator	koong
NCT01147107	thuy le	Study Director	le
NCT01147107	van vinh chau nguyen	Principal Investigator	nguyen
NCT01147211	chih-hsin yang	Principal Investigator	yang
NCT01148225	andy payne	Study Director	payne
NCT01148849	robert lechleider	Study Director	lechleider
NCT01149083	jeffrey weitzel	Principal Investigator	weitzel
NCT01149850	phioanh nghiemphu	Principal Investigator	nghiemphu
NCT01150045	jeffrey meyerhardt	Study Chair	meyerhardt
NCT01152541	peter hersh	Principal Investigator	hersh
NCT01153243	leon fogelfeld	Study Director	fogelfeld
NCT01154387	stuart flechner	Principal Investigator	flechner
NCT01154816	yael mosse	Principal Investigator	mosse
NCT01154920	vali papadimitrakopoulou	Study Chair	papadimitrakopoulou
NCT01155284	alex rabinovitch	Principal Investigator	rabinovitch
NCT01155284	diane l hahn	Study Director	hahn
NCT01155583	ehsan malek	Principal Investigator	malek
NCT01155583	frederic reu	Principal Investigator	reu
NCT01155817	george chen	Principal Investigator	chen
NCT01156142	robert c. miller	Study Chair	miller
NCT01157091	sumanta pal	Principal Investigator	pal
NCT01157416	michael s scheeringa	Principal Investigator	scheeringa
NCT01157975	hesham elkhayat	Principal Investigator	elkhayat
NCT01157975	mario chojkier	Principal Investigator	chojkier
NCT01157975	martina buck	Principal Investigator	buck
NCT01158105	alan miller	Principal Investigator	miller
NCT01158222	brian rini	Principal Investigator	rini
NCT01158651	bruce r. korf	Study Chair	korf
NCT01159028	maro ohanian	Principal Investigator	ohanian
NCT01159522	muh-hwan su	Study Director	su
NCT01159990	esper kallas	Study Chair	kallas
NCT01160458	raffit hassan	Principal Investigator	hassan
NCT01161524	haichen yang	Study Director	yang
NCT01162785	colin p. dinney	Study Chair	dinney
NCT01163084	christopher logothetis	Principal Investigator	logothetis
NCT01163786	jayesh mehta	Principal Investigator	mehta
NCT01163786	manu jain	Principal Investigator	jain
NCT01165112	ajay gopal	Principal Investigator	gopal
NCT01167114	eunice kwak	Principal Investigator	kwak
NCT01167192	rebecca aft	Principal Investigator	aft
NCT01167725	alexander stojadinovic	Principal Investigator	stojadinovic
NCT01168219	ravi vij	Principal Investigator	vij
NCT01168232	carolyn mccourt	Principal Investigator	mccourt
NCT01169259	joann e. manson	Principal Investigator	manson
NCT01169259	julie e. buring	Principal Investigator	buring
NCT01169402	kevin m watt	Principal Investigator	watt
NCT01169636	yasuhiro oki	Principal Investigator	oki
NCT01171092	sunil abhyankar	Principal Investigator	abhyankar
NCT01172938	douglas hough	Study Director	hough
NCT01173523	leena gandhi	Principal Investigator	gandhi
NCT01173692	gary b. gunn	Principal Investigator	gunn
NCT01174082	muzaffar h. qazilbash	Principal Investigator	qazilbash
NCT01174264	manish sharma	Principal Investigator	sharma
NCT01175109	deric m park	Principal Investigator	park
NCT01175148	mehdi hamadani	Principal Investigator	hamadani
NCT01176461	nikhil i. khushalani	Principal Investigator	khushalani
NCT01176474	nikhil khushalani	Principal Investigator	khushalani
NCT01177397	kristen hege	Study Director	hege
NCT01178281	robert p gale	Study Director	gale
NCT01178814	mark heaney	Principal Investigator	heaney
NCT01180036	fernando c. fervenza	Principal Investigator	fervenza
NCT01180855	richard r bootzin	Principal Investigator	bootzin
NCT01180959	ahmed kaseb	Principal Investigator	kaseb
NCT01181271	yi-bin a chen	Principal Investigator	chen
NCT01182350	mark w. kieran	Study Chair	kieran
NCT01182441	david r. holmes	Principal Investigator	holmes
NCT01182441	vivek y. reddy	Principal Investigator	reddy
NCT01183416	brian kushner	Principal Investigator	kushner
NCT01184326	joaquim bellmunt	Principal Investigator	bellmunt
NCT01185067	scott l hummel	Principal Investigator	hummel
NCT01186562	melena bellin	Principal Investigator	bellin
NCT01187199	shannon westin	Principal Investigator	westin
NCT01188421	eric c. strain	Principal Investigator	strain
NCT01188876	marcela g. del carmen	Principal Investigator	carmen
NCT01189266	jack su	Principal Investigator	su
NCT01189383	joseph fay	Principal Investigator	fay
NCT01190098	nancy foldvary-schaefer	Principal Investigator	foldvary-schaefer
NCT01190449	cara a. rosenbaum	Principal Investigator	rosenbaum
NCT01192555	chrystal u. louis	Principal Investigator	louis
NCT01192828	johan vanhove	Principal Investigator	vanhove
NCT01193517	michael overman	Principal Investigator	overman
NCT01193842	juan ramos	Principal Investigator	ramos
NCT01194219	irina khanskaya	Study Director	khanskaya
NCT01195415	mark zalupski	Principal Investigator	zalupski
NCT01196390	howard safran	Principal Investigator	safran
NCT01197378	craig langman	Principal Investigator	langman
NCT01197560	oliver manzke	Study Director	manzke
NCT01198028	bonnie s. glisson	Principal Investigator	glisson
NCT01198067	sheeba k. thomas	Principal Investigator	thomas
NCT01198158	george philips	Principal Investigator	philips
NCT01199146	charles j ryan	Principal Investigator	ryan
NCT01199263	david cohn	Principal Investigator	cohn
NCT01199575	danelle f james	Principal Investigator	james
NCT01200329	yago nieto	Principal Investigator	nieto
NCT01200355	genovefa papanicolaou	Principal Investigator	papanicolaou
NCT01202994	kevin duff	Principal Investigator	duff
NCT01204918	carlos zarate	Principal Investigator	zarate
NCT01204918	gerard sanacora	Principal Investigator	sanacora
NCT01204918	maurizio fava	Principal Investigator	fava
NCT01204918	sanjay matthew	Principal Investigator	matthew
NCT01206166	daren k. heyland	Study Chair	heyland
NCT01207050	anthony lequerica	Principal Investigator	lequerica
NCT01207323	andrea pirzkall	Study Director	pirzkall
NCT01207492	andrew j. wagner	Principal Investigator	wagner
NCT01207908	meilan rutter	Principal Investigator	rutter
NCT01209325	joel palefsky	Principal Investigator	palefsky
NCT01209442	douglas ney	Principal Investigator	ney
NCT01209598	mark dickson	Principal Investigator	dickson
NCT01210222	kathleen moore	Principal Investigator	moore
NCT01210664	jeffrey bluestone	Study Director	bluestone
NCT01210664	kevan herold	Principal Investigator	herold
NCT01210664	stephen e gitelman	Study Chair	gitelman
NCT01211262	namir hassan	Study Director	hassan
NCT01211405	michael c mithoefer	Principal Investigator	mithoefer
NCT01211730	mark e molitch	Principal Investigator	molitch
NCT01212822	barbara burtness	Principal Investigator	burtness
NCT01212900	david a bluemke	Principal Investigator	bluemke
NCT01212952	martha lacy	Study Chair	lacy
NCT01213082	susanna s park	Principal Investigator	park
NCT01213238	apostolia m. tsimberidou	Principal Investigator	tsimberidou
NCT01214083	gihyun yoon	Principal Investigator	yoon
NCT01214187	joe gn garcia	Principal Investigator	garcia
NCT01214187	rosas o ivan	Principal Investigator	ivan
NCT01215136	matthew galsky	Study Chair	galsky
NCT01215253	wojciech zareba	Principal Investigator	zareba
NCT01216280	longgui wang	Study Director	wang
NCT01216982	daniel t johnston	Principal Investigator	johnston
NCT01217060	steven h. lin	Principal Investigator	lin
NCT01217385	bruce j. tromberg	Principal Investigator	tromberg
NCT01217437	adam levy	Principal Investigator	levy
NCT01218048	rober l ferris	Principal Investigator	ferris
NCT01218555	taofeek owonikoko	Principal Investigator	owonikoko
NCT01220609	linda duska	Principal Investigator	duska
NCT01220973	susan goodin	Principal Investigator	goodin
NCT01221181	gerald b appel	Principal Investigator	appel
NCT01221792	arifulla khan	Study Director	khan
NCT01222260	suzanne lentzsch	Principal Investigator	lentzsch
NCT01222689	andrew ko	Principal Investigator	ko
NCT01222754	katherine e warren	Principal Investigator	warren
NCT01224067	gustavo d kinrys	Principal Investigator	kinrys
NCT01224730	ed cullen	Study Director	cullen
NCT01225055	thomas j schnizter	Principal Investigator	schnizter
NCT01227044	lynn e sullivan (fiellin)	Principal Investigator	(fiellin)
NCT01228175	kent hutchison	Principal Investigator	hutchison
NCT01228318	igho ofotokun	Principal Investigator	ofotokun
NCT01228318	mervyn n weitzmann	Principal Investigator	weitzmann
NCT01229566	kevin c maki	Principal Investigator	maki
NCT01229761	roger l shapiro	Principal Investigator	shapiro
NCT01229761	shahin lockman	Principal Investigator	lockman
NCT01232738	yunxia wang	Principal Investigator	wang
NCT01234467	steven park	Principal Investigator	park
NCT01234766	frederick lansigan	Principal Investigator	lansigan
NCT01234935	richard finn	Principal Investigator	finn
NCT01237067	jung-min lee	Principal Investigator	lee
NCT01237457	ebrahim s delpassand	Principal Investigator	delpassand
NCT01238211	guido marcucci	Principal Investigator	marcucci
NCT01238237	john boockvar	Principal Investigator	boockvar
NCT01239394	jeremy s. abramson	Principal Investigator	abramson
NCT01240590	james gulley	Principal Investigator	gulley
NCT01241500	steven m. fruchtman	Study Chair	fruchtman
NCT01241734	tatyana feldman	Principal Investigator	feldman
NCT01242267	scott d rowley	Principal Investigator	rowley
NCT01243190	william g. weirda	Study Chair	weirda
NCT01243944	mark jones	Study Director	jones
NCT01245101	rafael e campo	Principal Investigator	campo
NCT01245673	aaron rapoport	Study Chair	rapoport
NCT01245673	ed stadtmauer	Principal Investigator	stadtmauer
NCT01246622	elizabeth griffiths	Principal Investigator	griffiths
NCT01247246	israel rios	Study Director	rios
NCT01249430	rebecca klisovic	Principal Investigator	klisovic
NCT01249443	missak haigentz	Principal Investigator	haigentz
NCT01250925	christine sindt	Principal Investigator	sindt
NCT01250925	pedram hamrah	Principal Investigator	hamrah
NCT01251861	anna ferrari	Principal Investigator	ferrari
NCT01252953	louise bowman	Principal Investigator	bowman
NCT01252953	martin landray	Principal Investigator	landray
NCT01253070	geoffrey uy	Principal Investigator	uy
NCT01253161	jonathan strosberg	Principal Investigator	strosberg
NCT01253473	barry j make	Principal Investigator	make
NCT01253473	edwin k silverman	Principal Investigator	silverman
NCT01253473	james d crapo	Principal Investigator	crapo
NCT01253642	tomasz beer	Principal Investigator	beer
NCT01254617	erin bertino	Principal Investigator	bertino
NCT01256268	robert wenham	Principal Investigator	wenham
NCT01256398	matthew wieduwilt	Principal Investigator	wieduwilt
NCT01257737	colleen canavan	Study Chair	canavan
NCT01258933	william g wierda	Principal Investigator	wierda
NCT01259063	guido dalbagni	Principal Investigator	dalbagni
NCT01259089	melissa johnson	Principal Investigator	johnson
NCT01260688	sebastien hotte	Principal Investigator	hotte
NCT01261247	patrick johnston	Study Chair	johnston
NCT01261299	chong-xian pan	Study Chair	pan
NCT01263769	christopher wood	Principal Investigator	wood
NCT01263782	john heymach	Principal Investigator	heymach
NCT01263938	ronald g collman	Principal Investigator	collman
NCT01263951	marcia brose	Principal Investigator	brose
NCT01264432	nilofer azad	Principal Investigator	azad
NCT01264705	adam c yopp	Principal Investigator	yopp
NCT01265433	marjorie zauderer	Principal Investigator	zauderer
NCT01265550	stuart j spechler	Study Chair	spechler
NCT01265563	paolo fanti	Principal Investigator	fanti
NCT01266031	mark r gilbert	Principal Investigator	gilbert
NCT01266083	peter maslak	Principal Investigator	maslak
NCT01267240	eric chen	Principal Investigator	chen
NCT01267955	antoine italiano	Principal Investigator	italiano
NCT01268553	ronald j oudiz	Principal Investigator	oudiz
NCT01269346	sam misir	Study Director	misir
NCT01269385	steven ansell	Study Chair	ansell
NCT01271374	bobby v khan	Principal Investigator	khan
NCT01271374	keith c ferdinand	Study Director	ferdinand
NCT01271504	melissa j versola	Study Director	versola
NCT01272830	mark w kovacik	Study Director	kovacik
NCT01272830	thomas f bear	Principal Investigator	bear
NCT01273337	james m hinson	Study Director	hinson
NCT01273662	ann-lii cheng	Principal Investigator	cheng
NCT01275586	melissa markel	Study Chair	markel
NCT01275677	louis fehrenbacher	Principal Investigator	fehrenbacher
NCT01276041	chau dang	Principal Investigator	dang
NCT01276210	anuradha chakravarthy	Principal Investigator	chakravarthy
NCT01276704	carol fabian	Principal Investigator	fabian
NCT01276730	partha s basu	Principal Investigator	basu
NCT01277744	andrea hayes-jordan	Principal Investigator	hayes-jordan
NCT01279954	eric b. suhler	Principal Investigator	suhler
NCT01279954	james t rosenbaum	Study Director	rosenbaum
NCT01280955	mitchell horwitz	Principal Investigator	horwitz
NCT01280955	saurabh chhabra	Principal Investigator	chhabra
NCT01281124	gregory otterson	Principal Investigator	otterson
NCT01281176	michael maitland	Principal Investigator	maitland
NCT01281488	clayton lau	Principal Investigator	lau
NCT01281852	ritu salani	Principal Investigator	salani
NCT01281969	susan e swedo	Principal Investigator	swedo
NCT01282242	lawrence latour	Principal Investigator	latour
NCT01282242	lee schwamm	Principal Investigator	schwamm
NCT01282242	ona wu	Principal Investigator	wu
NCT01282242	steven warach	Principal Investigator	warach
NCT01282476	jeremy s abramson	Principal Investigator	abramson
NCT01283009	gianfranco umberto meduri	Study Chair	meduri
NCT01283178	shiyu song	Principal Investigator	song
NCT01286272	kristie blum	Principal Investigator	blum
NCT01286727	weizhong cai	Study Director	cai
NCT01286779	nirjhar chatterjee	Study Director	chatterjee
NCT01287104	nirali n shah	Principal Investigator	shah
NCT01287195	scott snapper	Principal Investigator	snapper
NCT01287936	gary k steinberg	Principal Investigator	steinberg
NCT01287936	james markert	Principal Investigator	markert
NCT01287936	joshua m rosenow	Principal Investigator	rosenow
NCT01287936	lawrence r wechsler	Principal Investigator	wechsler
NCT01287936	robert e gross	Principal Investigator	gross
NCT01289353	carmen perez	Principal Investigator	perez
NCT01290263	david reardon	Principal Investigator	reardon
NCT01290692	gary wood	Study Chair	wood
NCT01290783	peter gibbs	Principal Investigator	gibbs
NCT01295502	cecelia boardman	Principal Investigator	boardman
NCT01295515	frank maldarelli	Principal Investigator	maldarelli
NCT01295645	borje s. andersson	Principal Investigator	andersson
NCT01295697	rochelle bagatell	Study Chair	bagatell
NCT01295710	anne kuan	Study Director	kuan
NCT01296672	javier hernandez	Principal Investigator	hernandez
NCT01297309	hjalmar lagast	Study Director	lagast
NCT01297413	lev verkh	Study Director	verkh
NCT01297452	david hyman	Principal Investigator	hyman
NCT01297829	ronald s chamberlain	Principal Investigator	chamberlain
NCT01297959	jerrold h levy	Principal Investigator	levy
NCT01297959	michael j stamos	Principal Investigator	stamos
NCT01297959	peter o'hanley	Study Director	o'hanley
NCT01297959	robert martindale	Study Chair	martindale
NCT01298570	hanna sanoff	Principal Investigator	sanoff
NCT01299038	jeffrey b. zwicker	Principal Investigator	zwicker
NCT01299116	david hubacher	Principal Investigator	hubacher
NCT01300078	wulf utian	Principal Investigator	utian
NCT01300611	uday r popat	Principal Investigator	popat
NCT01300728	shawn kile	Principal Investigator	kile
NCT01301443	peter a campochiaro	Principal Investigator	campochiaro
NCT01302210	lance r peterson	Principal Investigator	peterson
NCT01302834	andy m. trotti	Principal Investigator	trotti
NCT01302834	maura gillison	Principal Investigator	gillison
NCT01303705	brendan d curti	Principal Investigator	curti
NCT01304095	narendra singh	Principal Investigator	singh
NCT01304602	joaquina baranda	Principal Investigator	baranda
NCT01305200	nathaniel treister	Principal Investigator	treister
NCT01305213	bradley monk	Principal Investigator	monk
NCT01305252	roham t. zamanian	Principal Investigator	zamanian
NCT01306929	karl kieburtz	Principal Investigator	kieburtz
NCT01307618	thomas gajewski	Principal Investigator	gajewski
NCT01307631	panagiotis konstantinopoulos	Principal Investigator	konstantinopoulos
NCT01309672	thomas w. flaig	Principal Investigator	flaig
NCT01309789	dana kennedy	Study Director	kennedy
NCT01309802	michael w neumeister	Principal Investigator	neumeister
NCT01311674	gerald winnan	Principal Investigator	winnan
NCT01311674	ronald brown	Principal Investigator	brown
NCT01311687	mohamed zaki	Study Director	zaki
NCT01315431	lee s schwartzberg	Principal Investigator	schwartzberg
NCT01316146	barbara savoldo	Principal Investigator	savoldo
NCT01316757	renee mehra	Principal Investigator	mehra
NCT01317199	michael a carducci	Principal Investigator	carducci
NCT01318915	james markmann	Principal Investigator	markmann
NCT01321879	issam raad	Principal Investigator	raad
NCT01322048	mayur b patel	Principal Investigator	patel
NCT01322490	philip kantoff	Principal Investigator	kantoff
NCT01323062	juneko grilley olson	Principal Investigator	olson
NCT01323751	sagar lonial	Principal Investigator	lonial
NCT01324635	wenyin shi	Principal Investigator	shi
NCT01326871	hing c wong	Study Chair	wong
NCT01327573	sanjay kulkarni	Principal Investigator	kulkarni
NCT01327781	matthew goetz	Principal Investigator	goetz
NCT01327911	weng tao	Study Chair	tao
NCT01328535	roxana dronca	Study Chair	dronca
NCT01328626	sari enschede	Study Director	enschede
NCT01329016	david flockhart	Principal Investigator	flockhart
NCT01329016	gary dv hankins	Principal Investigator	hankins
NCT01329016	mary f. hebert	Principal Investigator	hebert
NCT01329016	steve caritis	Principal Investigator	caritis
NCT01330693	floyd r sallee	Principal Investigator	sallee
NCT01330966	arthur staddon	Study Chair	staddon
NCT01330966	warren chow	Study Chair	chow
NCT01331135	muna qayed	Principal Investigator	qayed
NCT01331148	ifeyinwa osunkwo	Principal Investigator	osunkwo
NCT01332630	nuhad k. ibrahim	Principal Investigator	ibrahim
NCT01333033	karyn a. goodman	Study Chair	goodman
NCT01335932	ajit limaye	Principal Investigator	limaye
NCT01335932	michael boeckh	Principal Investigator	boeckh
NCT01335971	janet t holbrook	Principal Investigator	holbrook
NCT01336842	david gandara	Principal Investigator	gandara
NCT01339871	siqing fu	Principal Investigator	fu
NCT01342224	todd crocenzi	Principal Investigator	crocenzi
NCT01343368	angela smith	Principal Investigator	smith
NCT01343771	catherine m gordon	Principal Investigator	gordon
NCT01344187	vineeta belanger	Study Director	belanger
NCT01344824	thomas e. stinchcombe	Principal Investigator	stinchcombe
NCT01345058	jong woo lee	Principal Investigator	lee
NCT01345175	philip paty	Principal Investigator	paty
NCT01346371	ahmad m fahmy	Principal Investigator	fahmy
NCT01347541	douglas zatzick	Principal Investigator	zatzick
NCT01347970	saro armenian	Principal Investigator	armenian
NCT01349049	alexander perl	Principal Investigator	perl
NCT01349049	catherine smith	Principal Investigator	smith
NCT01349049	eunice wang	Principal Investigator	wang
NCT01349049	john pagel	Principal Investigator	pagel
NCT01349049	mark levis	Principal Investigator	levis
NCT01349660	john hainsworth	Study Chair	hainsworth
NCT01349959	vered stearns	Principal Investigator	stearns
NCT01351896	jeffrey jones	Principal Investigator	jones
NCT01352117	mina c hosseinipour	Study Chair	hosseinipour
NCT01352117	thomas b campbell	Study Chair	campbell
NCT01352312	mark weiss	Principal Investigator	weiss
NCT01352520	auris huen	Principal Investigator	huen
NCT01352962	andrea b apolo	Principal Investigator	apolo
NCT01353599	miroslav radulovic	Principal Investigator	radulovic
NCT01355705	michaela liedtke	Principal Investigator	liedtke
NCT01356628	christina brus	Principal Investigator	brus
NCT01358266	abu abraham	Study Director	abraham
NCT01358734	robert gale	Study Director	gale
NCT01360593	dwight e heron	Principal Investigator	heron
NCT01360593	rodney wegner	Principal Investigator	wegner
NCT01361113	william kim	Principal Investigator	kim
NCT01361711	shuo ma	Principal Investigator	ma
NCT01362374	premal h. patel	Study Director	patel
NCT01363206	lynn e. spitler	Principal Investigator	spitler
NCT01365221	ron waksman	Principal Investigator	waksman
NCT01365559	james r berenson	Principal Investigator	berenson
NCT01368497	averell sherker	Study Chair	sherker
NCT01368497	ed doo	Study Chair	doo
NCT01368497	kathleen schwarz	Principal Investigator	schwarz
NCT01370213	sarah cooley	Principal Investigator	cooley
NCT01370447	gregory enns	Principal Investigator	enns
NCT01370564	philip adamson	Principal Investigator	adamson
NCT01372111	patrick d. maguire	Principal Investigator	maguire
NCT01372202	ronan kelly	Principal Investigator	kelly
NCT01372228	joanne k. kurtzberg	Principal Investigator	kurtzberg
NCT01372579	virginia kaklamani	Principal Investigator	kaklamani
NCT01373294	mayer fishman	Principal Investigator	fishman
NCT01375699	andrew s. poklepovic	Principal Investigator	poklepovic
NCT01376349	debra barton	Principal Investigator	barton
NCT01377168	ann duerr	Principal Investigator	duerr
NCT01377168	frederick altice	Study Director	altice
NCT01377389	ana m. aparicio	Principal Investigator	aparicio
NCT01378273	sandra e juul	Principal Investigator	juul
NCT01378299	reina c villareal	Principal Investigator	villareal
NCT01379287	mrinal gounder	Principal Investigator	gounder
NCT01380080	johnstone kumwenda	Study Chair	kumwenda
NCT01380106	nikhil c munshi	Principal Investigator	munshi
NCT01380145	adam d cohen	Principal Investigator	cohen
NCT01380145	hearn j cho	Study Chair	cho
NCT01380145	nikoletta lendvai	Principal Investigator	lendvai
NCT01380535	christian peters	Study Director	peters
NCT01381692	leonard heffner	Principal Investigator	heffner
NCT01381718	jeffrey p. krischer	Study Chair	krischer
NCT01381718	nicole j. ullrich	Study Chair	ullrich
NCT01381822	alexander starodub	Principal Investigator	starodub
NCT01383148	quoix elisabeth	Principal Investigator	elisabeth
NCT01383161	gary w small	Principal Investigator	small
NCT01383343	joleen hubbard	Principal Investigator	hubbard
NCT01385228	daniel j george	Principal Investigator	george
NCT01385293	andrew armstrong	Principal Investigator	armstrong
NCT01386632	john h lee	Study Chair	lee
NCT01390064	laura hutchins	Principal Investigator	hutchins
NCT01390077	william l nyhan	Principal Investigator	nyhan
NCT01392287	brent p forester	Principal Investigator	forester
NCT01392625	joshua m hare	Principal Investigator	hare
NCT01392989	everett meyer	Principal Investigator	meyer
NCT01393405	hans herfarth	Principal Investigator	herfarth
NCT01393912	alberto broniscer	Principal Investigator	broniscer
NCT01395004	shannon r morris	Study Director	morris
NCT01395316	adil javed	Principal Investigator	javed
NCT01395329	christopher a desouza	Principal Investigator	desouza
NCT01396317	robert f spiera	Principal Investigator	spiera
NCT01396499	marina konopleva	Principal Investigator	konopleva
NCT01399827	craig surman	Principal Investigator	surman
NCT01400516	daniel h solomon	Principal Investigator	solomon
NCT01400516	ellen m. gravallese	Principal Investigator	gravallese
NCT01400516	marcy b. bolster	Principal Investigator	bolster
NCT01400672	christopher moertel	Principal Investigator	moertel
NCT01401062	silvia formenti	Principal Investigator	formenti
NCT01401647	myron weisfeldt	Study Chair	weisfeldt
NCT01402284	mark j roschewski	Principal Investigator	roschewski
NCT01403311	jefferson chen	Principal Investigator	chen
NCT01404312	richard e. chaisson	Study Chair	chaisson
NCT01404312	susan swindells	Study Chair	swindells
NCT01404949	jae park	Principal Investigator	park
NCT01406119	christopher ocampo	Study Director	ocampo
NCT01406873	richard t. moxley	Principal Investigator	moxley
NCT01407094	madhukar h trivedi	Principal Investigator	trivedi
NCT01407094	myrna weissman	Principal Investigator	weissman
NCT01407094	patrick j mcgrath	Principal Investigator	mcgrath
NCT01407094	ramin parsey	Principal Investigator	parsey
NCT01407107	jonathan dowell	Principal Investigator	dowell
NCT01407198	edwin choy	Principal Investigator	choy
NCT01407562	rebecca moss	Principal Investigator	moss
NCT01410565	show-li sun	Study Director	sun
NCT01411774	eric storch	Principal Investigator	storch
NCT01412229	jared weiss	Principal Investigator	weiss
NCT01413763	robert w babilon	Study Director	babilon
NCT01415297	daniel d. von hoff	Principal Investigator	hoff
NCT01415297	howard a. burris	Principal Investigator	burris
NCT01415427	matthew mealiffe	Study Director	mealiffe
NCT01415921	stuart d katz	Principal Investigator	katz
NCT01416428	dave ramies	Study Director	ramies
NCT01417000	dung t le	Principal Investigator	le
NCT01417026	robert t. schultz	Principal Investigator	schultz
NCT01417182	steve cho	Principal Investigator	cho
NCT01418261	deepak l bhatt	Principal Investigator	bhatt
NCT01418261	george bakris	Principal Investigator	bakris
NCT01420250	jianqing lin	Principal Investigator	lin
NCT01420874	hemchandra mahaseth	Principal Investigator	mahaseth
NCT01421342	sidney zisook	Study Chair	zisook
NCT01421342	somaia mohamed	Study Chair	mohamed
NCT01423604	william williams	Study Director	williams
NCT01424241	pamela u freda	Principal Investigator	freda
NCT01424670	charles wells	Study Director	wells
NCT01425476	edward sauter	Principal Investigator	sauter
NCT01426074	peter o'dwyer	Principal Investigator	o'dwyer
NCT01429025	grzegorz s. nowakowski	Study Chair	nowakowski
NCT01429350	j mocco	Principal Investigator	mocco
NCT01429350	osama zaidat	Principal Investigator	zaidat
NCT01429350	pooja khatri	Principal Investigator	khatri
NCT01429454	kristin s cadenhead	Principal Investigator	cadenhead
NCT01430572	david s hong	Principal Investigator	hong
NCT01430689	milagritos d tapia	Principal Investigator	tapia
NCT01430689	myron m levine	Study Director	levine
NCT01430689	samba o sow	Principal Investigator	sow
NCT01432574	anna giuliano	Principal Investigator	giuliano
NCT01433172	jhanelle gray	Principal Investigator	gray
NCT01434901	burton m wice	Principal Investigator	wice
NCT01434901	dominic reeds	Principal Investigator	reeds
NCT01435135	supachai rerks-ngarm	Principal Investigator	rerks-ngarm
NCT01435720	john a lust	Principal Investigator	lust
NCT01436214	elisabeth i heath	Principal Investigator	heath
NCT01436214	jeremy cetnar	Principal Investigator	cetnar
NCT01437449	a. dimitrios colevas	Principal Investigator	colevas
NCT01437488	jean hoffman-censits	Principal Investigator	hoffman-censits
NCT01437709	paul hamlin	Principal Investigator	hamlin
NCT01438554	nilo azad	Principal Investigator	azad
NCT01439711	shelley hwang	Study Chair	hwang
NCT01440764	robert b banzett	Principal Investigator	banzett
NCT01440816	shailender bhatia	Principal Investigator	bhatia
NCT01443728	gary brittenham	Principal Investigator	brittenham
NCT01443728	margaret t lee	Principal Investigator	lee
NCT01443936	mark connors	Principal Investigator	connors
NCT01445028	richard s kaiser	Principal Investigator	kaiser
NCT01445509	christina m annunziata	Principal Investigator	annunziata
NCT01446042	natalia tkachenko	Study Director	tkachenko
NCT01447056	carlos a ramos	Principal Investigator	ramos
NCT01449682	behnam sharareh	Study Director	sharareh
NCT01449682	ron p gallemore	Principal Investigator	gallemore
NCT01451606	joel greenspan	Principal Investigator	greenspan
NCT01454154	howard eisenberg	Principal Investigator	eisenberg
NCT01456104	james young	Principal Investigator	young
NCT01456780	reza dana	Principal Investigator	dana
NCT01457885	john m magenau	Principal Investigator	magenau
NCT01457885	shin mineishi	Study Chair	mineishi
NCT01457885	stephen j forman	Study Chair	forman
NCT01459380	lisa landrum	Principal Investigator	landrum
NCT01459614	dung le	Principal Investigator	le
NCT01461668	susan huang	Principal Investigator	huang
NCT01461824	andrea bonny	Principal Investigator	bonny
NCT01463046	charalambos andreadis	Principal Investigator	andreadis
NCT01466036	janet murphy	Principal Investigator	murphy
NCT01466179	max topp	Principal Investigator	topp
NCT01466179	nicola gĂ¶kbuget	Principal Investigator	gĂ¶kbuget
NCT01467999	elias dakwar	Principal Investigator	dakwar
NCT01467999	frances levin	Principal Investigator	levin
NCT01468311	thomas a waldmann	Principal Investigator	waldmann
NCT01468454	lisa j states	Principal Investigator	states
NCT01468896	william carson	Principal Investigator	carson
NCT01468909	debra richardson	Principal Investigator	richardson
NCT01469156	dennis m. marcus	Principal Investigator	marcus
NCT01469429	amit agrawal	Principal Investigator	agrawal
NCT01469520	daniel a gbadero	Study Director	gbadero
NCT01469520	moji c adeyeye	Principal Investigator	adeyeye
NCT01469572	bassel el-rayes	Principal Investigator	el-rayes
NCT01470196	steven p treon	Principal Investigator	treon
NCT01470417	thomas george	Principal Investigator	george
NCT01471444	richard e. champlin	Principal Investigator	champlin
NCT01472562	jia ruan	Principal Investigator	ruan
NCT01472965	joshua wolf	Principal Investigator	wolf
NCT01473524	david shapiro	Study Chair	shapiro
NCT01475513	kai cheang	Principal Investigator	cheang
NCT01476657	virginia kelly	Study Director	kelly
NCT01476787	nathan h fowler	Study Chair	fowler
NCT01477333	cindy madden	Study Chair	madden
NCT01477489	reshma jagsi	Principal Investigator	jagsi
NCT01478178	gerald falchook	Principal Investigator	falchook
NCT01478178	howard a burris	Principal Investigator	burris
NCT01478178	manish patel	Principal Investigator	patel
[truncated: 29,963 more rows]
[truncated: 1 more columns]
